# Supplementary material for: Metal-free divergent radical reactions of N -sulfonyl ynamides: substrate-controlled synthesis of α -sulfonyl amides and α -sulfonyl nitriles
Source: Royal Society of Chemistry journal article supplement (doi:10.1039/d5qo01373a), 2025-11-26
Supplement: d5qo01373a1.pdf [file d5qo01373a1.pdf]

## SUPPORTING INFORMATION

### **Metal-Free Divergent Radical Reactions of *N*-Sulfonyl Ynamides: Substrate-Controlled Synthesis of $\alpha$ -Sulfonyl Amides and $\alpha$ -Sulfonyl Nitriles**

Xinsong Liu<sup>1</sup>, Ruotong Chen<sup>1</sup>, Yu Yan, Yu Li, Junbiao Chang\*, Xiao-Na Wang\*

*Pingyuan Laboratory, State Key Laboratory of Antiviral Drugs, Key Laboratory of Advanced Drug Preparation Technologies, Ministry of Education, School of Pharmaceutical Sciences, Zhengzhou University, Zhengzhou, Henan 450001, P.R. China*

<sup>1</sup> These authors contributed equally to this work.

#### Table of Contents

|                                                                                                  |     |
|--------------------------------------------------------------------------------------------------|-----|
| Part I Experimental Part.....                                                                    | S2  |
| General Information .....                                                                        | S2  |
| 1.1 Synthesis of ynamides <b>1</b> and <b>1'</b> .....                                           | S2  |
| 1.2 Reaction condition optimization for $\alpha$ -sulfonyl amide formation.....                  | S11 |
| 1.3 Substrate scope of <i>N</i> -sulfonyl ynamides in $\alpha$ -sulfonyl amides synthesis .....  | S12 |
| 1.4 Substrate scope of <i>N</i> -sulfonyl ynamides in $\alpha$ -sulfonyl nitriles synthesis..... | S44 |
| 1.5 Gram-scale experiments and a synthetic application .....                                     | S53 |
| 1.6 Control experiments .....                                                                    | S55 |
| References .....                                                                                 | S56 |
| Part II Copies of <sup>1</sup> H NMR, <sup>13</sup> C NMR, and <sup>19</sup> F NMR Spectra ..... | S58 |

## Part I Experimental Part

### General Information

Unless otherwise indicated, all starting materials were obtained from commercial supplies and used as received. All reactions were performed in oven-dried glassware under a nitrogen atmosphere. Solvents were distilled before use. Chromatographic separations were performed using 200~300 mesh silica gel.  $^1\text{H}$  NMR and  $^{13}\text{C}$  NMR spectra were obtained on a Bruker's Ascend<sup>TM</sup> 400 NMR spectrometer using  $\text{CDCl}_3$  as solvent with TMS or residual solvent as standard unless otherwise noted.  $^{13}\text{C}$  NMR (100 MHz) spectra were reported in ppm with the internal chloroform signal at 77.2 ppm as a standard. Infrared spectra were obtained on a PerkinElmer FT/IR spectrophotometer, and relative intensities are expressed qualitatively as s (strong), m (medium), and w (weak). TLC analysis was performed using 254 nm polyester-backed plates and visualized using UV and  $\text{KMnO}_4$  stain. High-resolution mass spectra (HRMS) were performed on a Bruker MicrOTOF-Q II mass spectrometer.

### 1.1 Synthesis of ynamides **1** and **1'**

The known ynamides **1a**<sup>1</sup>, **1b**<sup>1</sup>, **1c**<sup>1</sup>, **1d**<sup>1</sup>, **1e**<sup>11</sup>, **1f**<sup>11</sup>, **1g**<sup>1</sup>, **1h**<sup>7</sup>, **1i**<sup>7</sup>, **1j**<sup>7</sup>, **1k**<sup>7</sup>, **1l**<sup>7</sup>, **1m**<sup>7</sup>, **1o**<sup>7</sup>, **1p**<sup>7</sup>, **1u**<sup>1</sup>, **1v**<sup>5</sup>, **1w**<sup>3</sup>, **1x**<sup>10</sup>, **1z**<sup>4</sup>, **1aa**<sup>6</sup>, **1ab**<sup>3</sup>, **1ac**<sup>1</sup>, **1ad**<sup>2</sup>, **1ae**<sup>7</sup>, **1af**<sup>7</sup>, **1ag**<sup>7</sup>, **1ah**<sup>7</sup>, **1ai**<sup>7</sup>, **1aj**<sup>8</sup>, **1ak**<sup>7</sup>, **1al**<sup>7</sup>, **1am**<sup>7</sup>, **1an**<sup>7</sup>, **1ap**<sup>9</sup>, **1aq**<sup>2</sup>, **1ar**<sup>7</sup>, **1a'**<sup>1</sup>, **1f'**<sup>16</sup>, **1g'**<sup>14</sup>, **1h'**<sup>2</sup>, **1i'**<sup>13</sup>, **1k'**<sup>14</sup> and **1l'**<sup>15</sup> were synthesized according to previously reported procedures, with analytical data consistent with literature values.

The novel ynamides **1n**, **1q**, **1r**, **1s**, **1t**, **1y**, **1ao**, **1b'**, **1c'**, **1d'**, **1e'**, **1j'**, **1m'**, and **1n'** were prepared according to literatures.<sup>7,10,17</sup>

#### Synthesis of ynamides **1n**, **1q-1t**, **1b'-1e'**, **1j'**, **1m'**, and **1n'**<sup>7</sup>

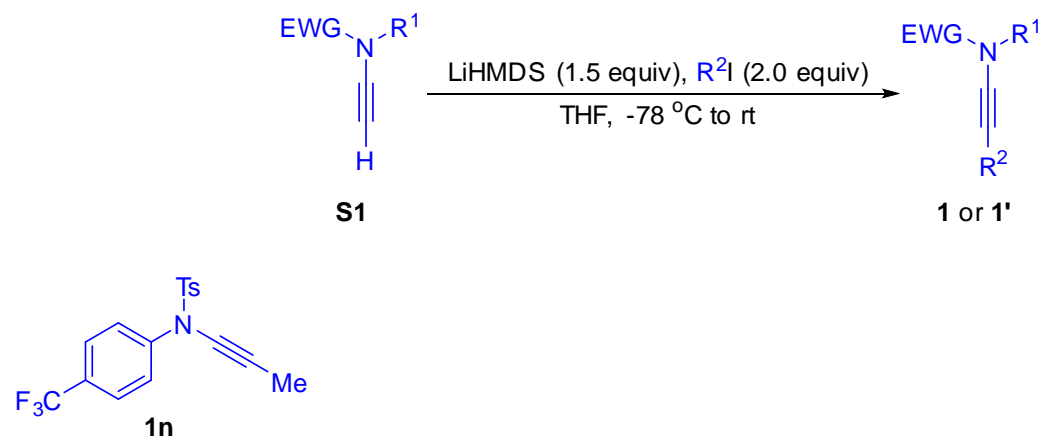

To an oven-dried round-bottom flask under N<sub>2</sub> atmosphere was added the corresponding ynamide

**S1** (678.7 mg, 2.00 mmol) and anhydrous THF (10.0 mL). The resulting solution was cooled to  $-78\text{ }^{\circ}\text{C}$ , then LiHMDS (3.0 mL, 1.0 M in THF) was added dropwise. The reaction mixture was gradually warmed to  $-60\text{ }^{\circ}\text{C}$  and equilibrated for 1.0 h with vigorous stirring. At this temperature, iodomethane (249.0  $\mu\text{L}$ , 4.00 mmol) was added. The resulting mixture was then allowed to warm gradually to room temperature and stirred for an additional 12.0 h under a nitrogen atmosphere. Upon confirmation of reaction completion by TLC, the mixture was quenched with distilled water (20 mL). The aqueous phase was extracted with ethyl acetate ( $3 \times 10.0\text{ mL}$ ), and the combined organic extracts were washed with saturated brine, dried over anhydrous  $\text{Na}_2\text{SO}_4$ , filtered, concentrated in vacuo, and purified by flash silica gel column chromatography [gradient eluent: 30:1~20:1 petroleum ether/EtOAc] to afford ynamide **1n** (473.5 mg, 1.34 mmol) in 67% yield.

**1n**:  $R_f = 0.23$  [20:1 petroleum ether/EtOAc]; white solid; mp =  $104\text{--}105\text{ }^{\circ}\text{C}$ ;  $^1\text{H}$  NMR (400 MHz,  $\text{CDCl}_3$ )  $\delta$  7.57 (dd, 4H,  $J = 8.3, 3.1\text{ Hz}$ ), 7.43 (d, 2H,  $J = 8.0\text{ Hz}$ ), 7.29 (d, 2H,  $J = 7.7\text{ Hz}$ ), 2.44 (s, 3H), 1.95 (s, 3H);  $^{13}\text{C}$  NMR (100 MHz,  $\text{CDCl}_3$ )  $\delta$  145.3, 142.5, 132.9, 129.8, 129.7 (q,  $J_{\text{C-F}} = 32.5\text{ Hz}$ ), 128.2, 126.3 (q,  $J_{\text{C-F}} = 3.8\text{ Hz}$ ), 125.8, 123.9 (q,  $J_{\text{C-F}} = 270.5\text{ Hz}$ ), 72.0, 67.4, 21.9, 3.5;  $^{19}\text{F}$  NMR (376 MHz,  $\text{CDCl}_3$ )  $\delta$  -62.5; IR (neat) ( $\text{cm}^{-1}$ ) 2048m, 1612w, 1372m, 1320s, 1162s, 1065s, 907m, 813s; HRMS (ESI):  $m/z$  calcd for  $\text{C}_{17}\text{H}_{15}\text{F}_3\text{NO}_2\text{S}$  [ $\text{M} + \text{H}$ ] $^+$  354.0770, found 354.0773.

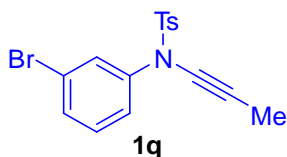

To an oven-dried round-bottom flask under  $\text{N}_2$  atmosphere was added the corresponding ynamide **S1** (700.5 mg, 2.00 mmol) and anhydrous THF (10.0 mL). The resulting solution was cooled to  $-78\text{ }^{\circ}\text{C}$ , then LiHMDS (3.0 mL, 1.0 M in THF) was added dropwise. The reaction mixture was gradually warmed to  $-60\text{ }^{\circ}\text{C}$  and equilibrated for 1.0 h with vigorous stirring. At this temperature, iodomethane (249.0  $\mu\text{L}$ , 4.00 mmol) was added. The resulting mixture was then allowed to warm gradually to room temperature and stirred for an additional 12.0 h under a nitrogen atmosphere. Upon confirmation of reaction completion by TLC, the mixture was quenched with distilled water (20 mL). The aqueous phase was extracted with ethyl acetate ( $3 \times 10.0\text{ mL}$ ), and the combined organic extracts were washed with saturated brine, dried over anhydrous  $\text{Na}_2\text{SO}_4$ , filtered, concentrated in vacuo, and purified by flash silica gel column chromatography [gradient eluent: 15:1~10:1 petroleum ether/EtOAc] to afford ynamide **1q** (633.8 mg, 1.74 mmol) in 87% yield.

**1q**:  $R_f = 0.41$  [10:1 petroleum ether/EtOAc]; white solid; mp =  $124\text{--}125\text{ }^{\circ}\text{C}$ ;  $^1\text{H}$  NMR (400 MHz,  $\text{CDCl}_3$ )  $\delta$  7.56 (d, 2H,  $J = 8.4\text{ Hz}$ ), 7.47-7.37 (m, 2H), 7.31-7.23 (m, 3H), 7.18 (t, 1H,  $J = 8.3\text{ Hz}$ ), 2.44 (s, 3H), 1.94 (s, 3H);  $^{13}\text{C}$  NMR (100 MHz,  $\text{CDCl}_3$ )  $\delta$  145.2, 140.6, 132.8, 131.0, 130.3, 129.7,

128.9, 128.3, 124.8, 122.2, 72.2, 66.9, 21.9, 3.5; IR (neat) ( $\text{cm}^{-1}$ ) 2356w, 1583m, 1369s, 1288m, 1165s, 924m, 817s, 665s; HRMS (ESI):  $m/z$  calcd for  $\text{C}_{16}\text{H}_{15}\text{BrNO}_2\text{S}$   $[\text{M} + \text{H}]^+$  364.0001, found 364.0007.

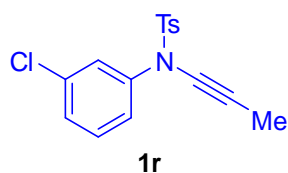

To an oven-dried round-bottom flask under  $\text{N}_2$  atmosphere was added the corresponding ynamide **S1** (611.6 mg, 2.00 mmol) and anhydrous THF (10.0 mL). The resulting solution was cooled to  $-78^\circ\text{C}$ , then LiHMDS (3.0 mL, 1.0 M in THF) was added dropwise. The reaction mixture was gradually warmed to  $-60^\circ\text{C}$  and equilibrated for 1.0 h with vigorous stirring. At this temperature, iodomethane (249.0  $\mu\text{L}$ , 4.00 mmol) was added. The resulting mixture was then allowed to warm gradually to room temperature and stirred for an additional 12.0 h under a nitrogen atmosphere. Upon confirmation of reaction completion by TLC, the mixture was quenched with distilled water (20 mL). The aqueous phase was extracted with ethyl acetate ( $3 \times 10.0$  mL), and the combined organic extracts were washed with saturated brine, dried over anhydrous  $\text{Na}_2\text{SO}_4$ , filtered, concentrated in vacuo, and purified by flash silica gel column chromatography [gradient eluent: 15:1~10:1 petroleum ether/EtOAc] to afford ynamide **1r** (524.5 mg, 1.64 mmol) in 82% yield.

**1r**:  $R_f$  = 0.38 [10:1 petroleum ether/EtOAc]; white solid; mp =  $120\text{--}121^\circ\text{C}$ ;  $^1\text{H}$  NMR (400 MHz,  $\text{CDCl}_3$ )  $\delta$  7.56 (d, 2H,  $J$  = 8.4 Hz), 7.32-7.19 (m, 6H), 2.44 (s, 3H), 1.94 (s, 3H);  $^{13}\text{C}$  NMR (100 MHz,  $\text{CDCl}_3$ )  $\delta$  145.2, 140.5, 134.5, 132.9, 130.0, 129.7, 128.3, 128.1, 126.1, 124.3, 72.2, 66.9, 21.9, 3.5; IR (neat) ( $\text{cm}^{-1}$ ) 2260w, 1588m, 1369s, 1265w, 1168s, 931s, 889m, 782m; HRMS (ESI):  $m/z$  calcd for  $\text{C}_{16}\text{H}_{15}\text{ClNO}_2\text{S}$   $[\text{M} + \text{H}]^+$  320.0507, found 320.0508.

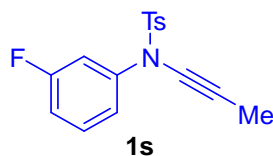

To an oven-dried round-bottom flask under  $\text{N}_2$  atmosphere was added the corresponding ynamide **S1** (578.6 mg, 2.00 mmol) and anhydrous THF (10.0 mL). The resulting solution was cooled to  $-78^\circ\text{C}$ , then LiHMDS (3.0 mL, 1.0 M in THF) was added dropwise. The reaction mixture was gradually warmed to  $-60^\circ\text{C}$  and equilibrated for 1.0 h with vigorous stirring. At this temperature, iodomethane (249.0  $\mu\text{L}$ , 4.00 mmol) was added. The resulting mixture was then allowed to warm gradually to room temperature and stirred for an additional 12.0 h under a nitrogen atmosphere. Upon confirmation of reaction completion by TLC, the mixture was quenched with distilled water (20 mL). The aqueous phase was extracted with ethyl acetate ( $3 \times 10.0$  mL), and the combined



organic extracts were washed with saturated brine, dried over anhydrous  $\text{Na}_2\text{SO}_4$ , filtered, concentrated in vacuo, and purified by flash silica gel column chromatography [gradient eluent: 15:1~10:1 petroleum ether/EtOAc] to afford ynamide **1s** (473.2 mg, 1.56 mmol) in 78% yield.

**1s**:  $R_f$  = 0.41 [10:1 petroleum ether/EtOAc]; white solid; mp = 85–86 °C;  $^1\text{H}$  NMR (400 MHz,  $\text{CDCl}_3$ )  $\delta$  7.57 (d, 2H,  $J$  = 8.2 Hz), 7.31–7.26 (m, 3H), 7.11 (d, 1H,  $J$  = 8.4 Hz), 7.07–6.89 (m, 2H), 2.44 (s, 3H), 1.95 (s, 3H);  $^{13}\text{C}$  NMR (100 MHz,  $\text{CDCl}_3$ )  $\delta$  162.6 (d,  $J_{\text{C-F}}$  = 245.8 Hz), 145.2, 140.8 (d,  $J_{\text{C-F}}$  = 9.8 Hz), 132.9, 130.2 (d,  $J_{\text{C-F}}$  = 8.9 Hz), 129.7, 128.3, 121.6 (d,  $J_{\text{C-F}}$  = 3.3 Hz), 114.9 (d,  $J_{\text{C-F}}$  = 21.0 Hz), 113.3 (d,  $J_{\text{C-F}}$  = 24.2 Hz), 72.2, 66.9, 21.9, 3.5;  $^{19}\text{F}$  NMR (376 MHz,  $\text{CDCl}_3$ )  $\delta$  -111.2; IR (neat) ( $\text{cm}^{-1}$ ) 2350w, 1592m, 1479m, 1361m, 1169s, 1226m, 890m, 874s; HRMS (ESI):  $m/z$  calcd for  $\text{C}_{16}\text{H}_{15}\text{FNO}_2\text{S}$  [ $\text{M} + \text{H}$ ] $^+$  304.0802, found 304.0804.

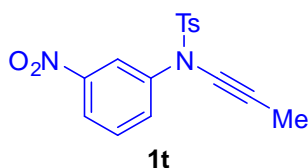

To an oven-dried round-bottom flask under  $\text{N}_2$  atmosphere was added the corresponding ynamide **S1** (632.7 mg, 2.00 mmol) and anhydrous THF (10.0 mL). The resulting solution was cooled to –78 °C, then LiHMDS (3.0 mL, 1.0 M in THF) was added dropwise. The reaction mixture was gradually warmed to –60 °C and equilibrated for 1.0 h with vigorous stirring. At this temperature, iodomethane (249.0  $\mu\text{L}$ , 4.00 mmol) was added. The resulting mixture was then allowed to warm gradually to room temperature and stirred for an additional 12.0 h under a nitrogen atmosphere. Upon confirmation of reaction completion by TLC, the mixture was quenched with distilled water (20 mL). The aqueous phase was extracted with ethyl acetate ( $3 \times 10.0$  mL), and the combined organic extracts were washed with saturated brine, dried over anhydrous  $\text{Na}_2\text{SO}_4$ , filtered, concentrated in vacuo, and purified by flash silica gel column chromatography [gradient eluent: 15:1~10:1 petroleum ether/EtOAc] to afford ynamide **1t** (409.6 mg, 1.24 mmol) in 62% yield.

**1t**:  $R_f$  = 0.27 [10:1 petroleum ether/EtOAc]; white solid; mp = 131–132 °C;  $^1\text{H}$  NMR (400 MHz,  $\text{CDCl}_3$ )  $\delta$  8.14 (ddd, 1H,  $J$  = 8.2, 2.2, 1.0 Hz), 8.09 (t, 1H,  $J$  = 2.1 Hz), 7.76 (ddd, 1H,  $J$  = 8.1, 2.2, 1.0 Hz), 7.58–7.51 (m, 3H), 7.30 (d, 2H,  $J$  = 8.7 Hz), 2.45 (s, 3H), 1.98 (s, 3H);  $^{13}\text{C}$  NMR (100 MHz,  $\text{CDCl}_3$ )  $\delta$  148.5, 145.7, 140.7, 132.6, 132.0, 129.93, 129.91, 128.2, 122.5, 120.3, 71.6, 68.1, 21.9, 3.5; IR (neat) ( $\text{cm}^{-1}$ ) 2930m, 2260w, 1530s, 1369m, 1171s, 1083m, 917m, 815m; HRMS (ESI):  $m/z$  calcd for  $\text{C}_{16}\text{H}_{15}\text{N}_2\text{O}_4\text{S}$  [ $\text{M} + \text{H}$ ] $^+$  331.0747, found 331.0747.

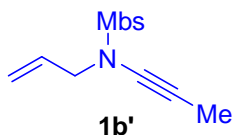

To an oven-dried round-bottom flask under N<sub>2</sub> atmosphere was added the corresponding ynamide **S1** (502.6 mg, 2.00 mmol) and anhydrous THF (10.0 mL). The resulting solution was cooled to –78 °C, then LiHMDS (3.0 mL, 1.0 M in THF) was added dropwise. The reaction mixture was gradually warmed to –60 °C and equilibrated for 1.0 h with vigorous stirring. At this temperature, iodomethane (249.0 μL, 4.00 mmol) was added. The resulting mixture was then allowed to warm gradually to room temperature and stirred for an additional 12.0 h under a nitrogen atmosphere. Upon confirmation of reaction completion by TLC, the mixture was quenched with distilled water (20 mL). The aqueous phase was extracted with ethyl acetate (3 × 10.0 mL), and the combined organic extracts were washed with saturated brine, dried over anhydrous Na<sub>2</sub>SO<sub>4</sub>, filtered, concentrated in vacuo, and purified by flash silica gel column chromatography [gradient eluent: 15:1~10:1 petroleum ether/EtOAc] to afford ynamide **1b'** (451.1 mg, 1.70 mmol) in 85% yield.

**1b'**: *R*<sub>f</sub> = 0.26 [10:1 petroleum ether/EtOAc]; white solid; mp = 51–52 °C; <sup>1</sup>H NMR (400 MHz, CDCl<sub>3</sub>) δ 7.74 (d, 2H, *J* = 8.9 Hz), 6.93 (d, 2H, *J* = 9.0 Hz), 5.70–5.58 (m, 1H), 5.18–5.07 (m, 2H), 3.82 (d, 2H, *J* = 6.2 Hz), 3.80 (s, 3H), 1.79 (s, 3H); <sup>13</sup>C NMR (100 MHz, CDCl<sub>3</sub>) δ 163.6, 131.3, 129.9, 129.2, 119.6, 114.3, 72.1, 65.8, 55.7, 54.2, 3.3; IR (neat) (cm<sup>–1</sup>) 2920w, 2255w, 1595s, 1496s, 1302m, 1161s, 936s, 829s; HRMS (ESI): *m/z* calcd for C<sub>13</sub>H<sub>16</sub>NO<sub>3</sub>S [M + H]<sup>+</sup> 266.0845, found 266.0849.

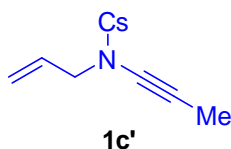

To an oven-dried round-bottom flask under N<sub>2</sub> atmosphere was added the corresponding ynamide **S1** (511.4 mg, 2.00 mmol) and anhydrous THF (10.0 mL). The resulting solution was cooled to –78 °C, then LiHMDS (3.0 mL, 1.0 M in THF) was added dropwise. The reaction mixture was gradually warmed to –60 °C and equilibrated for 1.0 h with vigorous stirring. At this temperature, iodomethane (249.0 μL, 4.00 mmol) was added. The resulting mixture was then allowed to warm gradually to room temperature and stirred for an additional 12.0 h under a nitrogen atmosphere. Upon confirmation of reaction completion by TLC, the mixture was quenched with distilled water (20 mL). The aqueous phase was extracted with ethyl acetate (3 × 10.0 mL), and the combined organic extracts were washed with saturated brine, dried over anhydrous Na<sub>2</sub>SO<sub>4</sub>, filtered, concentrated in vacuo, and purified by flash silica gel column chromatography [gradient eluent: 15:1~10:1 petroleum ether/EtOAc] to afford ynamide **1c'** (442.4 mg, 1.64 mmol) in 82% yield.

**1c'**: *R*<sub>f</sub> = 0.52 [10:1 petroleum ether/EtOAc]; colorless oil; <sup>1</sup>H NMR (400 MHz, CDCl<sub>3</sub>) δ 7.84 (d, 2H, *J* = 8.7 Hz), 7.53 (d, 2H, *J* = 8.7 Hz), 5.77–5.66 (m, 1H), 5.27–5.18 (m, 2H), 3.94 (d, 2H, *J* = 6.3 Hz),

1.89 (s, 3H);  $^{13}\text{C}$  NMR (100 MHz,  $\text{CDCl}_3$ )  $\delta$  140.2, 136.4, 131.0, 129.6, 129.3, 120.1, 71.6, 66.4, 54.5, 3.4; IR (neat) ( $\text{cm}^{-1}$ ) 3094w, 2261m, 1583m, 1477s, 1360s, 1235m, 988s, 838s; HRMS (ESI):  $m/z$  calcd for  $\text{C}_{12}\text{H}_{13}\text{ClNO}_2\text{S}$   $[\text{M} + \text{H}]^+$  270.0350, found 270.0352.

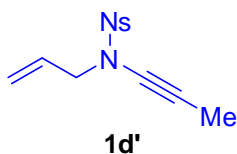

To an oven-dried round-bottom flask under  $\text{N}_2$  atmosphere was added the corresponding ynamide **S1** (532.5 mg, 2.00 mmol) and anhydrous THF (10.0 mL). The resulting solution was cooled to  $-78\text{ }^\circ\text{C}$ , then LiHMDS (3.0 mL, 1.0 M in THF) was added dropwise. The reaction mixture was gradually warmed to  $-60\text{ }^\circ\text{C}$  and equilibrated for 1.0 h with vigorous stirring. At this temperature, iodomethane (249.0  $\mu\text{L}$ , 4.00 mmol) was added. The resulting mixture was then allowed to warm gradually to room temperature and stirred for an additional 12.0 h under a nitrogen atmosphere. Upon confirmation of reaction completion by TLC, the mixture was quenched with distilled water (20 mL). The aqueous phase was extracted with ethyl acetate ( $3 \times 10.0\text{ mL}$ ), and the combined organic extracts were washed with saturated brine, dried over anhydrous  $\text{Na}_2\text{SO}_4$ , filtered, concentrated in vacuo, and purified by flash silica gel column chromatography [gradient eluent: 15:1~10:1 petroleum ether/EtOAc] to afford ynamide **1d'** (353.2 mg, 1.26 mmol) in 63% yield.

**1d'**:  $R_f$  = 0.35 [10:1 petroleum ether/EtOAc]; white solid; mp =  $71\text{--}72\text{ }^\circ\text{C}$ ;  $^1\text{H}$  NMR (400 MHz,  $\text{CDCl}_3$ )  $\delta$  8.40 (d, 2H,  $J$  = 8.9 Hz), 8.09 (d, 2H,  $J$  = 8.9 Hz), 5.77-5.65 (m, 1H), 5.29-5.19 (m, 2H), 4.00 (d, 2H,  $J$  = 6.3 Hz), 1.90 (s, 3H);  $^{13}\text{C}$  NMR (100 MHz,  $\text{CDCl}_3$ )  $\delta$  150.7, 143.4, 130.6, 129.1, 124.5, 120.5, 71.0, 67.0, 54.8, 3.4; IR (neat) ( $\text{cm}^{-1}$ ) 2260w, 1527s, 1440m, 1345s, 1170s, 991m, 831s; HRMS (ESI):  $m/z$  calcd for  $\text{C}_{12}\text{H}_{13}\text{N}_2\text{O}_4\text{S}$   $[\text{M} + \text{H}]^+$  281.0591, found 281.0590.

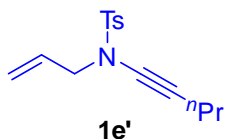

To an oven-dried round-bottom flask under  $\text{N}_2$  atmosphere was added the corresponding ynamide **S1** (470.6 mg, 2.00 mmol) and anhydrous THF (10.0 mL). The resulting solution was cooled to  $-78\text{ }^\circ\text{C}$ , then LiHMDS (3.0 mL, 1.0 M in THF) was added dropwise. The reaction mixture was gradually warmed to  $-60\text{ }^\circ\text{C}$  and equilibrated for 1.0 h with vigorous stirring. At this temperature, iodopropane (390.1  $\mu\text{L}$ , 4.00 mmol) was added. The resulting mixture was then allowed to warm gradually to room temperature and stirred for an additional 12.0 h under a nitrogen atmosphere. Upon confirmation of reaction completion by TLC, the mixture was quenched with distilled water (20 mL). The aqueous phase was extracted with ethyl acetate ( $3 \times 10.0\text{ mL}$ ), and the combined organic extracts were washed with saturated brine, dried over anhydrous  $\text{Na}_2\text{SO}_4$ , filtered,

concentrated in vacuo, and purified by flash silica gel column chromatography [gradient eluent: 15:1~10:1 petroleum ether/EtOAc] to afford ynamide **1e'** (382.8 mg, 1.38 mmol) in 69% yield.

**1e'**:  $R_f$  = 0.50 [10:1 petroleum ether/EtOAc]; yellow oil;  $^1\text{H}$  NMR (400 MHz,  $\text{CDCl}_3$ )  $\delta$  7.78 (d, 2H,  $J$  = 8.3 Hz), 7.33 (d, 2H,  $J$  = 8.1 Hz), 5.78-5.65 (m, 1H), 5.25-5.15 (m, 2H), 3.91 (d, 2H,  $J$  = 6.2 Hz), 2.45 (s, 3H), 2.22 (t, 2H,  $J$  = 6.9 Hz), 1.54-1.44 (m, 2H), 0.93 (t, 3H,  $J$  = 7.4 Hz);  $^{13}\text{C}$  NMR (100 MHz,  $\text{CDCl}_3$ )  $\delta$  144.5, 134.8, 131.3, 129.7, 127.8, 119.7, 73.2, 70.4, 54.4, 22.5, 21.8, 20.5, 13.5; IR (neat) ( $\text{cm}^{-1}$ ) 2960m, 2252m, 1596m, 1493w, 1361s, 1166s, 987m, 813s; HRMS (ESI):  $m/z$  calcd for  $\text{C}_{15}\text{H}_{20}\text{NO}_2\text{S}$  [ $\text{M} + \text{H}$ ] $^+$  278.1209, found 278.1211.

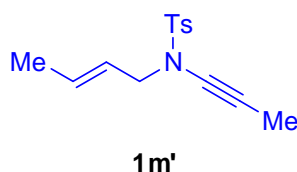

To an oven-dried round-bottom flask under  $\text{N}_2$  atmosphere was added the corresponding ynamide **S1** (498.7 mg, 2.00 mmol) and anhydrous THF (10.0 mL). The resulting solution was cooled to  $-78^\circ\text{C}$ , then LiHMDS (3.0 mL, 1.0 M in THF) was added dropwise. The reaction mixture was gradually warmed to  $-60^\circ\text{C}$  and equilibrated for 1.0 h with vigorous stirring. At this temperature, iodomethane (249.0  $\mu\text{L}$ , 4.00 mmol) was added. The resulting mixture was then allowed to warm gradually to room temperature and stirred for an additional 12.0 h under a nitrogen atmosphere. Upon confirmation of reaction completion by TLC, the mixture was quenched with distilled water (20 mL). The aqueous phase was extracted with ethyl acetate ( $3 \times 10.0$  mL), and the combined organic extracts were washed with saturated brine, dried over anhydrous  $\text{Na}_2\text{SO}_4$ , filtered, concentrated in vacuo, and purified by flash silica gel column chromatography [gradient eluent: 15:1~10:1 petroleum ether/EtOAc] to afford ynamide **1m'** (268.6 mg, 1.02 mmol) in 51% yield.

**1m'**:  $R_f$  = 0.33 [10:1 petroleum ether/EtOAc]; yellow oil;  $^1\text{H}$  NMR (400 MHz,  $\text{CDCl}_3$ )  $\delta$  7.77 (d, 2H,  $J$  = 8.4 Hz), 7.33 (d, 2H,  $J$  = 7.9 Hz), 5.69-5.60 (m, 1H), 5.40-5.32 (m, 1H), 3.84 (d, 2H,  $J$  = 6.7 Hz), 2.45 (s, 3H), 1.88 (s, 3H), 1.65 (d, 3H,  $J$  = 5.1 Hz);  $^{13}\text{C}$  NMR (100 MHz,  $\text{CDCl}_3$ )  $\delta$  144.4, 135.1, 131.7, 129.7, 127.8, 124.0, 72.2, 65.8, 53.9, 21.8, 17.9, 3.5; IR (neat) ( $\text{cm}^{-1}$ ) 2922m, 2072w, 1363s, 1169s, 1091m, 966w, 814m; HRMS (ESI):  $m/z$  calcd for  $\text{C}_{14}\text{H}_{18}\text{NO}_2\text{S}$  [ $\text{M} + \text{H}$ ] $^+$  264.1053, found 264.1053.

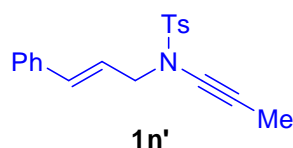

To an oven-dried round-bottom flask under  $\text{N}_2$  atmosphere was added the corresponding ynamide

**S1** (622.8 mg, 2.00 mmol) and anhydrous THF (10.0 mL). The resulting solution was cooled to  $-78\text{ }^{\circ}\text{C}$ , then LiHMDS (3.0 mL, 1.0 M in THF) was added dropwise. The reaction mixture was gradually warmed to  $-60\text{ }^{\circ}\text{C}$  and equilibrated for 1.0 h with vigorous stirring. At this temperature, iodomethane (249.0  $\mu\text{L}$ , 4.00 mmol) was added. The resulting mixture was then allowed to warm gradually to room temperature and stirred for an additional 12.0 h under a nitrogen atmosphere. Upon confirmation of reaction completion by TLC, the mixture was quenched with distilled water (20 mL). The aqueous phase was extracted with ethyl acetate ( $3 \times 10.0\text{ mL}$ ), and the combined organic extracts were washed with saturated brine, dried over anhydrous  $\text{Na}_2\text{SO}_4$ , filtered, concentrated in vacuo, and purified by flash silica gel column chromatography [gradient eluent: 15:1~10:1 petroleum ether/EtOAc] to afford ynamide **1n'** (637.8 mg, 1.96 mmol) in 98% yield.

**1n'**:  $R_f = 0.25$  [10:1 petroleum ether/EtOAc]; white solid; mp =  $96\text{--}97\text{ }^{\circ}\text{C}$ ;  $^1\text{H}$  NMR (400 MHz,  $\text{CDCl}_3$ )  $\delta$  7.79 (d, 2H,  $J = 8.2\text{ Hz}$ ), 7.31-7.24 (m, 7H), 6.49 (d, 1H,  $J = 15.6\text{ Hz}$ ), 6.02 (dt, 1H,  $J = 15.8, 6.6\text{ Hz}$ ), 4.08 (d, 2H,  $J = 6.7\text{ Hz}$ ), 2.41 (s, 3H), 1.87 (s, 3H);  $^{13}\text{C}$  NMR (100 MHz,  $\text{CDCl}_3$ )  $\delta$  144.5, 136.2, 135.0, 134.8, 129.8, 128.7, 128.1, 127.8, 126.7, 122.3, 72.2, 66.1, 54.2, 21.7, 3.5; IR (neat) ( $\text{cm}^{-1}$ ) 2916w, 2261w, 1637m, 1368s, 1173m, 1407m, 991w; HRMS (ESI):  $m/z$  calcd for  $\text{C}_{19}\text{H}_{20}\text{NO}_2\text{S}$   $[\text{M} + \text{H}]^+$  326.1209, found 326.1205.

#### Synthesis of ynamides **1ao** and **1j'**<sup>12,17</sup>

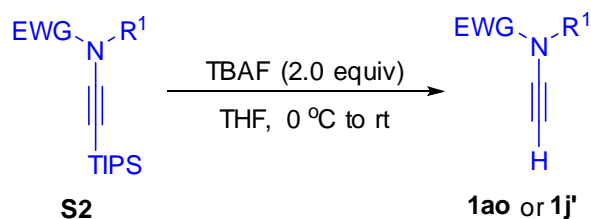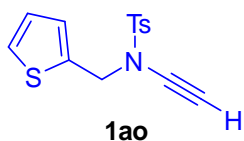

To an oven-dried round-bottom flask under  $\text{N}_2$  atmosphere was added the corresponding TIPS-protected ynamide **S2** (895.5 mg, 2.00 mmol) and anhydrous THF (10.0 mL). The resulting solution was cooled to  $0\text{ }^{\circ}\text{C}$ , then TBAF (4.0 mL of a 1.0 M solution in THF) was added dropwise. The reaction mixture was gradually warmed to room temperature and equilibrated for 0.5 h with vigorous stirring. Upon confirmation of reaction completion by TLC, the mixture was quenched with saturated ammonium chloride solution (4.0 mL), and distilled water (6.0 mL) was added. The aqueous phase was extracted with ethyl acetate ( $3 \times 10.0\text{ mL}$ ), and the combined organic extracts were washed with saturated brine, dried over anhydrous  $\text{Na}_2\text{SO}_4$ , filtered, concentrated in vacuo, and

purified by flash silica gel column chromatography [gradient eluent: 15:1~10:1 petroleum ether/EtOAc] to afford ynamide **1ao** (495.4 mg, 1.70 mmol) in 85% yield.

**1ao**:  $R_f$  = 0.26 [10:1 petroleum ether/EtOAc]; white solid; mp = 68–69 °C;  $^1\text{H}$  NMR (400 MHz,  $\text{CDCl}_3$ )  $\delta$  7.74 (d, 2H,  $J$  = 8.3 Hz), 7.30 (d, 2H,  $J$  = 7.8 Hz), 7.24 (dd, 1H,  $J$  = 5.1, 1.3 Hz), 7.00 (d, 1H,  $J$  = 3.5 Hz), 6.92 (dd, 1H,  $J$  = 5.1, 3.5 Hz), 4.73 (s, 2H), 2.76 (s, 1H), 2.44 (s, 3H);  $^{13}\text{C}$  NMR (100 MHz,  $\text{CDCl}_3$ )  $\delta$  145.0, 136.3, 134.8, 129.9, 128.7, 127.9, 126.9, 126.8, 75.9, 60.6, 50.1, 21.8; IR (neat) ( $\text{cm}^{-1}$ ) 2135m, 1595m, 1438w, 1356s, 1165s, 1135w, 914s; HRMS (ESI):  $m/z$  calcd for  $\text{C}_{14}\text{H}_{14}\text{NO}_2\text{S}_2$  [ $\text{M} + \text{H}$ ] $^+$  292.0460, found 292.0464.

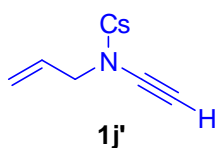

To an oven-dried round-bottom flask under  $\text{N}_2$  atmosphere was added the corresponding TIPS-protected ynamide **S2** (824.1 mg, 2.00 mmol) and anhydrous THF (10.0 mL). The resulting solution was cooled to 0 °C, then TBAF (4.0 mL of a 1.0 M solution in THF) was added dropwise. The reaction mixture was gradually warmed to room temperature and equilibrated for 0.5 h with vigorous stirring. Upon confirmation of reaction completion by TLC, the mixture was quenched with saturated ammonium chloride solution (4.0 mL), and distilled water (6.0 mL) was added. The aqueous phase was extracted with ethyl acetate ( $3 \times 10.0$  mL), and the combined organic extracts were washed with saturated brine, dried over anhydrous  $\text{Na}_2\text{SO}_4$ , filtered, concentrated in vacuo, and purified by flash silica gel column chromatography [gradient eluent: 15:1~10:1 petroleum ether/EtOAc] to afford ynamide **1j'** (439.8 mg, 1.72 mmol) in 86% yield.

**1j'**:  $R_f$  = 0.48 [10:1 petroleum ether/EtOAc]; white solid; mp = 64–65 °C;  $^1\text{H}$  NMR (400 MHz,  $\text{CDCl}_3$ )  $\delta$  7.87 (d, 2H,  $J$  = 8.7 Hz), 7.54 (d, 2H,  $J$  = 8.6 Hz), 5.79–5.66 (m, 1H), 5.32–5.20 (m, 2H), 3.99 (d, 2H,  $J$  = 6.4 Hz), 2.76 (s, 1H);  $^{13}\text{C}$  NMR (100 MHz,  $\text{CDCl}_3$ )  $\delta$  140.6, 136.1, 130.3, 129.6, 129.2, 120.6, 75.5, 59.7, 54.2; IR (neat) ( $\text{cm}^{-1}$ ) 2922w, 2255w, 1594s, 1496s, 1355s, 1160s, 936m; HRMS (ESI):  $m/z$  calcd for  $\text{C}_{11}\text{H}_{11}\text{ClNO}_2\text{S}$  [ $\text{M} + \text{H}$ ] $^+$  256.0194, found 256.0195.

### Synthesis of ynamide **1y**<sup>10</sup>

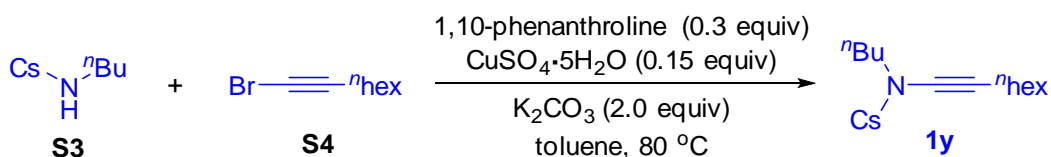

To an oven-dried round-bottom flask under  $\text{N}_2$  atmosphere was added the sulfonamide **S3** (743.2 mg, 3.00 mmol), 1-bromooct-1-yne **S4** (680.7 mg, 3.60 mmol), 1,10-phenanthroline (162.2 mg, 0.90 mmol),  $\text{CuSO}_4 \cdot 5\text{H}_2\text{O}$  (112.4 mg, 0.45 mmol),  $\text{K}_2\text{CO}_3$  (829.3 mg, 6.00 mmol) and toluene (15.0 mL)

in sequence. The reaction was stirred at 80 °C in an oil bath for 4.0 h. After the reaction was determined to be complete by TLC analysis, the reaction mixture was cooled to room temperature, filtered through a short pad of silica gel, concentrated in vacuo, and purified by flash silica gel column chromatography [isocratic eluent: 30:1 petroleum ether/EtOAc] to afford ynamide **1y** (800.8 mg, 2.25 mmol) in 75% yield.

**1y**:  $R_f$  = 0.45 [30:1 petroleum ether/EtOAc]; yellow oil;  $^1\text{H}$  NMR (400 MHz,  $\text{CDCl}_3$ )  $\delta$  7.85 (d, 2H,  $J$  = 8.6 Hz), 7.52 (d, 2H,  $J$  = 8.7 Hz), 3.28 (t, 2H,  $J$  = 7.1 Hz), 2.26 (t, 2H,  $J$  = 6.9 Hz), 1.67-1.55 (m, 2H), 1.53-1.41 (m, 2H), 1.39-1.22 (m, 8H), 0.94-0.85 (m, 6H);  $^{13}\text{C}$  NMR (100 MHz,  $\text{CDCl}_3$ )  $\delta$  139.9, 136.0, 129.3, 129.0, 72.6, 70.5, 51.3, 31.3, 29.8, 28.9, 28.5, 22.6, 19.4, 18.4, 14.1, 13.6; IR (neat) ( $\text{cm}^{-1}$ ) 2956w, 2930m, 2251m, 1584m, 1366s, 1217w, 1171s, 825m; HRMS (ESI):  $m/z$  calcd for  $\text{C}_{18}\text{H}_{27}\text{ClNO}_2\text{S}$   $[\text{M} + \text{H}]^+$  356.1446, found 356.1451.

## 1.2 Reaction condition optimization for $\alpha$ -sulfonyl amide formation

**Table 1. Reaction Condition Optimization for  $\alpha$ -Sulfonyl Amide Formation**

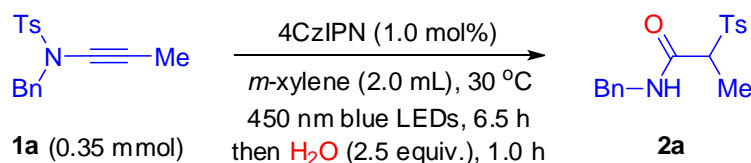

| Entry <sup>a</sup> | Variation from the standard reaction conditions      | Yield (%) <sup>b</sup> |
|--------------------|------------------------------------------------------|------------------------|
| 1                  | none                                                 | 94                     |
| 2                  | without 4CzIPN                                       | NR                     |
| 3                  | without light                                        | NR                     |
| 4                  | toluene instead of <i>m</i> -xylene                  | 81                     |
| 5                  | $\text{CH}_2\text{Cl}_2$ instead of <i>m</i> -xylene | 78                     |
| 6                  | DCE instead of <i>m</i> -xylene                      | 84                     |
| 7                  | THF instead of <i>m</i> -xylene                      | 87                     |
| 8                  | MeCN instead of <i>m</i> -xylene                     | 80                     |
| 9                  | 1,4-dioxane instead of <i>m</i> -xylene              | 89                     |
| 10                 | DMF instead of <i>m</i> -xylene                      | 54                     |
| 11                 | benzophenone instead of 4CzIPN                       | NR                     |
| 12                 | 405 nm instead of 450 nm LED                         | 79                     |
| 13                 | 365 nm instead of 450 nm LED                         | NR                     |
| 14 <sup>c</sup>    | none                                                 | 90                     |
| 15                 | thermal (130 °C), no photocatalyst/light             | 40                     |
| 16                 | thermal (140 °C), no photocatalyst/light             | 75                     |
| 17 <sup>c</sup>    | thermal (140 °C), no photocatalyst/light             | 73                     |

<sup>a</sup> Standard reaction conditions: **1a** (0.35 mmol), 4CzIPN (1.0 mol%), *m*-xylene (2.0 mL), 450 nm blue LED irradiation, 30 °C, 6.5 h, then  $\text{H}_2\text{O}$  (0.88 mmol, 2.5 equiv.), 1.0 h. <sup>b</sup> Isolated yields. <sup>c</sup> **1a** (1.00 mmol) was added. 4CzIPN = 2,4,5,6-tetra(9*H*-carbazol-9-yl)isophthalonitrile. NR = no reaction detected by TLC.



**Entry 14 (1.0 mmol synthetic method):** To a 10 mL Schlenk flask was added ynamide **1a** (299.4 mg, 1.0 mmol), 4CzIPN (7.9 mg, 0.01 mmol), and *m*-xylene (5.7 mL, ynamide *concn* = 0.175 M) under a nitrogen atmosphere. After 8 h of irradiation at a distance of ~3.5 cm (light intensity: 20 mW/cm<sup>2</sup> at 3.5 cm distance) with 30 W blue LEDs (450 nm) at 30 °C, water (45.0 μL, 2.5 mmol) was then added, and the mixture was stirred for an additional 1 h. After the reaction was determined to be complete by TLC analysis, the reaction mixture was purified by flash silica gel column chromatography [gradient eluent: 10:1~2:1 petroleum ether /EtOAc] to afford  $\alpha$ -sulfonyl amide **2a** (285.7 mg, 0.90 mmol) in 90% yield.

**Entry 17 (1.0 mmol synthetic method):** To an oven-dried tube was added ynamide **1a** (299.4 mg, 1.0 mmol), and *m*-xylene (5.7 mL, ynamide *concn* = 0.175 M) under a nitrogen atmosphere. The vessel was sealed and heated to 140 °C with stirring for 8 h. Water (45.0 μL, 2.5 mmol) was then added, and the mixture was stirred at 140 °C for an additional 2 h. After the reaction was determined to be complete by TLC analysis, the reaction mixture was purified by flash silica gel column chromatography [gradient eluent: 10:1~2:1 petroleum ether /EtOAc] to afford  $\alpha$ -sulfonyl amide **2a** (231.7 mg, 0.73 mmol) in 73% yield.

### 1.3 Substrate scope of *N*-sulfonyl ynamides in $\alpha$ -sulfonyl amides synthesis

All  $\alpha$ -sulfonyl amides are novel except for **2v**, **2w**, and **2ap**, which are known compounds.

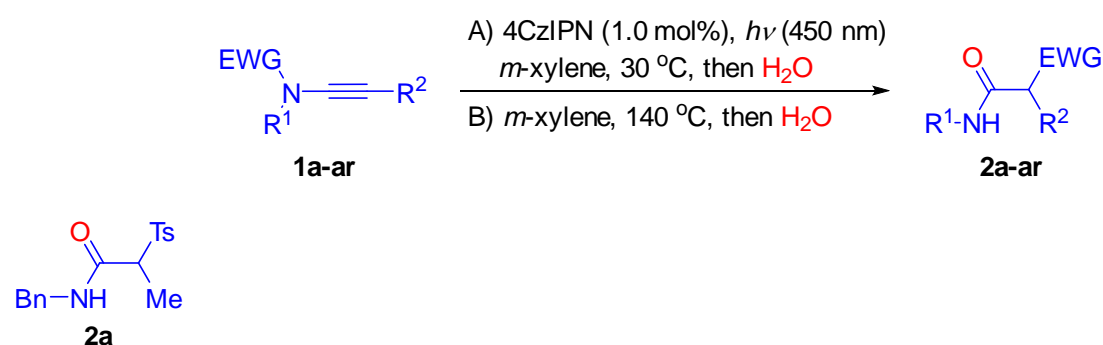

**Condition A:** To a 10 mL Schlenk flask was added ynamide **1a** (104.8 mg, 0.35 mmol), 4CzIPN (2.8 mg, 0.0035 mmol), and *m*-xylene (2.0 mL, ynamide *concn* = 0.175 M) under a nitrogen atmosphere. The reaction mixture was stirred and irradiated for 6.5 h at a distance of ~3.5 cm (light intensity: 20 mW/cm<sup>2</sup> at 3.5 cm distance) with 30 W blue LEDs (450 nm) at 30 °C. Water (15.8 μL, 0.88 mmol) was then added, and the mixture was stirred for an additional 1 h. After the reaction was determined to be complete by TLC analysis, the reaction mixture was purified by flash silica gel column chromatography [gradient eluent: 10:1~2:1 petroleum ether /EtOAc] to afford  $\alpha$ -sulfonyl



amide **2a** (104.5 mg, 0.33 mmol) in 94% yield.

**Condition B:** To an oven-dried tube was added ynamide **1a** (104.8 mg, 0.35 mmol), and *m*-xylene (2.0 mL, ynamide *concn* = 0.175 M) under a nitrogen atmosphere. The vessel was sealed and heated to 140 °C with stirring for 8.5 h. Water (15.8 µL, 0.88 mmol) was then added, and the mixture was stirred at 140 °C for an additional 1 h. After the reaction was determined to be complete by TLC analysis, the reaction mixture was purified by flash silica gel column chromatography [gradient eluent: 10:1~2:1 petroleum ether /EtOAc] to afford  $\alpha$ -sulfonyl amide **2a** (83.4 mg, 0.26 mmol) in 75% yield.

**2a:**  $R_f$  = 0.32 [2:1 petroleum ether/EtOAc]; white solid; mp = 141–142 °C;  $^1\text{H}$  NMR (400 MHz,  $\text{CDCl}_3$ )  $\delta$  7.58 (d, 2H,  $J$  = 8.1 Hz), 7.37–7.24 (m, 7H), 7.09 (t, 1H,  $J$  = 5.7 Hz), 4.49–4.39 (m, 2H), 3.91 (q, 1H,  $J$  = 7.1 Hz), 2.42 (s, 3H), 1.50 (d, 3H,  $J$  = 5.5 Hz);  $^{13}\text{C}$  NMR (100 MHz,  $\text{CDCl}_3$ )  $\delta$  164.6, 145.6, 137.6, 132.9, 130.0, 129.2, 128.8, 128.2, 127.8, 65.8, 44.2, 21.8, 12.2; IR (neat) ( $\text{cm}^{-1}$ ) 3352m, 1665s, 1524m, 1288m, 1212w, 1139s, 813m, 700m; HRMS (ESI):  $m/z$  calcd for  $\text{C}_{17}\text{H}_{20}\text{NO}_3\text{S}$  [ $\text{M} + \text{H}$ ] $^+$  318.1158, found 318.1163.

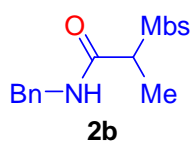

**Condition A:** To a 10 mL Schlenk flask was added ynamide **1b** (110.4 mg, 0.35 mmol), 4CzIPN (2.8 mg, 0.0035 mmol), and *m*-xylene (2.0 mL, ynamide *concn* = 0.175 M) under a nitrogen atmosphere. The reaction mixture was stirred and irradiated for 7.5 h at a distance of ~3.5 cm (light intensity: 20 mW/cm<sup>2</sup> at 3.5 cm distance) with 30 W blue LEDs (450 nm) at 30 °C. Water (15.8 µL, 0.88 mmol) was then added, and the mixture was stirred for an additional 1.5 h. After the reaction was determined to be complete by TLC analysis, the reaction mixture was purified by flash silica gel column chromatography [gradient eluent: 10:1~2:1 petroleum ether /EtOAc] to afford  $\alpha$ -sulfonyl amide **2b** (108.8 mg, 0.33 mmol) in 93% yield.

**Condition B:** To an oven-dried tube was added ynamide **1b** (110.4 mg, 0.35 mmol), and *m*-xylene (2.0 mL, ynamide *concn* = 0.175 M) under a nitrogen atmosphere. The vessel was sealed and heated to 140 °C with stirring for 5 h. Water (15.8 µL, 0.88 mmol) was then added, and the mixture was stirred at 140 °C for an additional 1 h. After the reaction was determined to be complete by TLC analysis, the reaction mixture was purified by flash silica gel column chromatography [gradient eluent: 10:1~2:1 petroleum ether /EtOAc] to afford  $\alpha$ -sulfonyl amide **2b** (82.1 mg, 0.25 mmol) in 70% yield.

**2b:**  $R_f$  = 0.18 [2:1 petroleum ether/EtOAc]; white solid; mp = 139–140 °C;  $^1\text{H}$  NMR (400 MHz,

CDCl<sub>3</sub>)  $\delta$  7.61 (d, 2H,  $J$  = 9.0 Hz), 7.38-7.30 (m, 5H), 7.06 (t, 1H,  $J$  = 5.9 Hz), 6.93-6.89 (m, 2H), 4.48-4.41 (m, 2H), 3.92-3.86 (m, 4H), 1.51 (d, 3H,  $J$  = 7.1 Hz); <sup>13</sup>C NMR (100 MHz, CDCl<sub>3</sub>)  $\delta$  164.7, 164.4, 137.6, 131.4, 128.9, 128.3, 127.8, 127.3, 114.6, 66.0, 55.8, 44.3, 12.3; IR (neat) (cm<sup>-1</sup>) 3353m, 1670s, 1594m, 1498m, 1318w, 1142s, 832s, 723s; HRMS (ESI):  $m/z$  calcd for C<sub>17</sub>H<sub>20</sub>NO<sub>4</sub>S [M + H]<sup>+</sup> 334.1108, found 334.1112.

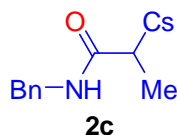

**Condition A:** To a 10 mL Schlenk flask was added ynamide **1c** (111.9 mg, 0.35 mmol), 4CzIPN (2.8 mg, 0.0035 mmol), and *m*-xylene (2.0 mL, ynamide *concn* = 0.175 M) under a nitrogen atmosphere. The reaction mixture was stirred and irradiated for 7.5 h at a distance of ~3.5 cm (light intensity: 20 mW/cm<sup>2</sup> at 3.5 cm distance) with 30 W blue LEDs (450 nm) at 30 °C. Water (15.8  $\mu$ L, 0.88 mmol) was then added, and the mixture was stirred for an additional 1.5 h. After the reaction was determined to be complete by TLC analysis, the reaction mixture was purified by flash silica gel column chromatography [gradient eluent: 10:1~2:1 petroleum ether /EtOAc] to afford  $\alpha$ -sulfonyl amide **2c** (111.0 mg, 0.33 mmol) in 94% yield.

**Condition B:** To an oven-dried tube was added ynamide **1c** (111.9 mg, 0.35 mmol), and *m*-xylene (2.0 mL, ynamide *concn* = 0.175 M) under a nitrogen atmosphere. The vessel was sealed and heated to 140 °C with stirring for 5.5 h. Water (15.8  $\mu$ L, 0.88 mmol) was then added, and the mixture was stirred at 140 °C for an additional 1 h. After the reaction was determined to be complete by TLC analysis, the reaction mixture was purified by flash silica gel column chromatography [gradient eluent: 10:1~2:1 petroleum ether /EtOAc] to afford  $\alpha$ -sulfonyl amide **2c** (91.8 mg, 0.27 mmol) in 78% yield.

**2c:**  $R_f$  = 0.31 [2:1 petroleum ether/EtOAc]; white solid; mp = 149–150 °C; <sup>1</sup>H NMR (400 MHz, CDCl<sub>3</sub>)  $\delta$  7.59 (d, 2H,  $J$  = 8.6 Hz), 7.43-7.29 (m, 7H), 6.98 (t, 1H,  $J$  = 5.7 Hz), 4.49-4.38 (m, 2H), 3.92 (q, 1H,  $J$  = 7.1 Hz), 1.51 (d, 3H,  $J$  = 7.1 Hz); <sup>13</sup>C NMR (100 MHz, CDCl<sub>3</sub>)  $\delta$  164.2, 141.4, 137.5, 134.2, 130.7, 129.7, 129.0, 128.3, 128.0, 66.0, 44.4, 12.2; IR (neat) (cm<sup>-1</sup>) 3346m, 1684s, 1660s, 1581w, 1522s, 1312m, 1143s, 829m; HRMS (ESI):  $m/z$  calcd for C<sub>16</sub>H<sub>17</sub>ClNO<sub>3</sub>S [M + H]<sup>+</sup> 338.0612, found 338.0618.

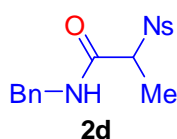

**Condition A:** To a 10 mL Schlenk flask was added ynamide **1d** (115.6 mg, 0.35 mmol), 4CzIPN

(2.8 mg, 0.0035 mmol), and *m*-xylene (2.0 mL, ynamide *concn* = 0.175 M) under a nitrogen atmosphere. The reaction mixture was stirred and irradiated for 6.5 h at a distance of ~3.5 cm (light intensity: 20 mW/cm<sup>2</sup> at 3.5 cm distance) with 30 W blue LEDs (450 nm) at 30 °C. Water (15.8 µL, 0.88 mmol) was then added, and the mixture was stirred for an additional 1 h. After the reaction was determined to be complete by TLC analysis, the reaction mixture was purified by flash silica gel column chromatography [gradient eluent: 10:1~2:1 petroleum ether /EtOAc] to afford  $\alpha$ -sulfonyl amide **2d** (99.6 mg, 0.29 mmol) in 82% yield.

**Condition B:** To an oven-dried tube was added ynamide **1d** (115.6 mg, 0.35 mmol), and *m*-xylene (2.0 mL, ynamide *concn* = 0.175 M) under a nitrogen atmosphere. The vessel was sealed and heated to 140 °C with stirring for 12 h. Water (15.8 µL, 0.88 mmol) was then added, and the mixture was stirred at 140 °C for an additional 1 h. After the reaction was determined to be complete by TLC analysis, the reaction mixture was purified by flash silica gel column chromatography [gradient eluent: 10:1~2:1 petroleum ether /EtOAc] to afford  $\alpha$ -sulfonyl amide **2d** (63.5 mg, 0.18 mmol) in 52% yield.

**2d:**  $R_f$  = 0.20 [2:1 petroleum ether/EtOAc]; white solid; mp = 160–161 °C; <sup>1</sup>H NMR (400 MHz, CDCl<sub>3</sub>)  $\delta$  8.25 (d, 2H,  $J$  = 8.8 Hz), 7.82 (d, 2H,  $J$  = 8.8 Hz), 7.44-7.35 (m, 3H), 7.35-7.29 (m, 2H), 6.90 (t, 1H,  $J$  = 6.1 Hz), 4.50-4.37 (m, 2H), 3.97 (q, 1H,  $J$  = 7.1 Hz), 1.56 (d, 3H,  $J$  = 7.1 Hz); <sup>13</sup>C NMR (100 MHz, CDCl<sub>3</sub>)  $\delta$  163.8, 151.2, 141.3, 137.3, 130.9, 129.1, 128.5, 128.2, 124.4, 66.3, 44.5, 12.1; IR (neat) (cm<sup>-1</sup>) 3340m, 1684s, 1532s, 1347m, 1297s, 1211w, 855m, 703s; HRMS (ESI):  $m/z$  calcd for C<sub>16</sub>H<sub>17</sub>N<sub>2</sub>O<sub>5</sub>S [M + H]<sup>+</sup> 349.0853, found 349.0857.

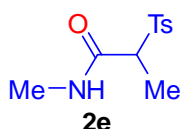

**Condition A:** To a 10 mL Schlenk flask was added ynamide **1e** (78.2 mg, 0.35 mmol), 4CzIPN (2.8 mg, 0.0035 mmol), and *m*-xylene (2.0 mL, ynamide *concn* = 0.175 M) under a nitrogen atmosphere. The reaction mixture was stirred and irradiated for 5.5 h at a distance of ~3.5 cm (light intensity: 20 mW/cm<sup>2</sup> at 3.5 cm distance) with 30 W blue LEDs (450 nm) at 30 °C. Water (15.8 µL, 0.88 mmol) was then added, and the mixture was stirred for an additional 1 h. After the reaction was determined to be complete by TLC analysis, the reaction mixture was purified by flash silica gel column chromatography [gradient eluent: 10:1~1:1 petroleum ether /EtOAc] to afford  $\alpha$ -sulfonyl amide **2e** (68.1 mg, 0.28 mmol) in 81% yield.

**Condition B:** To an oven-dried tube was added ynamide **1e** (78.2 mg, 0.35 mmol), and *m*-xylene (2.0 mL, ynamide *concn* = 0.175 M) under a nitrogen atmosphere. The vessel was sealed and heated

to 140 °C with stirring for 9 h. Water (15.8  $\mu$ L, 0.88 mmol) was then added, and the mixture was stirred at 140 °C for an additional 0.5 h. After the reaction was determined to be complete by TLC analysis, the reaction mixture was purified by flash silica gel column chromatography [gradient eluent: 10:1~1:1 petroleum ether /EtOAc] to afford  $\alpha$ -sulfonyl amide **2e** (50.1 mg, 0.21 mmol) in 59% yield.

**2e:**  $R_f$  = 0.22 [1:1 petroleum ether/EtOAc]; white solid; mp = 140–141 °C;  $^1\text{H}$  NMR (400 MHz,  $\text{CDCl}_3$ )  $\delta$  7.72 (d, 2H,  $J$  = 8.3 Hz), 7.36 (d, 2H,  $J$  = 8.1 Hz), 6.79 (s, 1H), 3.92 (q, 1H,  $J$  = 7.2 Hz), 2.85 (d, 3H,  $J$  = 4.9 Hz), 2.45 (s, 3H), 1.49 (d, 3H,  $J$  = 7.1 Hz);  $^{13}\text{C}$  NMR (100 MHz,  $\text{CDCl}_3$ )  $\delta$  165.3, 145.7, 133.1, 130.0, 129.2, 65.8, 27.0, 21.8, 12.3; IR (neat) ( $\text{cm}^{-1}$ ) 1640s, 1559m, 1449m, 1315s, 1296w, 1146s, 815m, 727s; HRMS (ESI):  $m/z$  calcd for  $\text{C}_{11}\text{H}_{16}\text{NO}_3\text{S}$  [ $\text{M} + \text{H}$ ] $^+$  242.0845, found 242.0849.

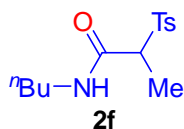

**Condition A:** To a 10 mL Schlenk flask was added ynamide **1f** (92.9 mg, 0.35 mmol), 4CzIPN (2.8 mg, 0.0035 mmol), and *m*-xylene (2.0 mL, ynamide *concn* = 0.175 *M*) under a nitrogen atmosphere. The reaction mixture was stirred and irradiated for 6 h at a distance of ~3.5 cm (light intensity: 20 mW/ $\text{cm}^2$  at 3.5 cm distance) with 30 W blue LEDs (450 nm) at 30 °C. Water (15.8  $\mu$ L, 0.88 mmol) was then added, and the mixture was stirred for an additional 1 h. After the reaction was determined to be complete by TLC analysis, the reaction mixture was purified by flash silica gel column chromatography [gradient eluent: 10:1~2:1 petroleum ether /EtOAc] to afford  $\alpha$ -sulfonyl amide **2f** (82.4 mg, 0.29 mmol) in 83% yield.

**Condition B:** To an oven-dried tube was added ynamide **1f** (92.9 mg, 0.35 mmol), and *m*-xylene (2.0 mL, ynamide *concn* = 0.175 *M*) under a nitrogen atmosphere. The vessel was sealed and heated to 140 °C with stirring for 5 h. Water (15.8  $\mu$ L, 0.88 mmol) was then added, and the mixture was stirred at 140 °C for an additional 1 h. After the reaction was determined to be complete by TLC analysis, the reaction mixture was purified by flash silica gel column chromatography [gradient eluent: 10:1~2:1 petroleum ether /EtOAc] to afford  $\alpha$ -sulfonyl amide **2f** (70.6 mg, 0.25 mmol) in 71% yield.

**2f:**  $R_f$  = 0.23 [4:1 petroleum ether/EtOAc]; white solid; mp = 81–82 °C;  $^1\text{H}$  NMR (400 MHz,  $\text{CDCl}_3$ )  $\delta$  7.72 (d, 2H,  $J$  = 8.3 Hz), 7.36 (d, 2H,  $J$  = 8.0 Hz), 6.67 (t, 1H,  $J$  = 6.4 Hz), 3.86 (q, 1H,  $J$  = 7.2 Hz), 3.27 (q, 2H,  $J$  = 6.9 Hz), 2.45 (s, 3H), 1.56–1.48 (m, 5H), 1.43–1.32 (m, 2H), 0.94 (t, 3H,  $J$  = 7.3 Hz);  $^{13}\text{C}$  NMR (100 MHz,  $\text{CDCl}_3$ )  $\delta$  164.6, 145.7, 133.3, 130.0, 129.2, 65.9, 40.1, 31.5, 21.9, 20.2, 13.9,

12.3; IR (neat) ( $\text{cm}^{-1}$ ) 3363m, 2957w, 1662s, 1524m, 1302m, 1141s, 998w, 814m; HRMS (ESI):  $m/z$  calcd for  $\text{C}_{14}\text{H}_{22}\text{NO}_3\text{S}$  [ $\text{M} + \text{H}$ ] $^{+}$  284.1315, found 284.1321.

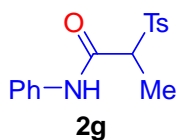

**Condition A:** To a 10 mL Schlenk flask was added ynamide **1g** (99.9 mg, 0.35 mmol), 4CzIPN (2.8 mg, 0.0035 mmol), and *m*-xylene (2.0 mL, ynamide *concn* = 0.175 M) under a nitrogen atmosphere. The reaction mixture was stirred and irradiated for 12 h at a distance of ~3.5 cm (light intensity: 20 mW/cm<sup>2</sup> at 3.5 cm distance) with 30 W blue LEDs (450 nm) at 30 °C. Water (15.8  $\mu\text{L}$ , 0.88 mmol) was then added, and the mixture was stirred for an additional 1 h. After the reaction was determined to be complete by TLC analysis, the reaction mixture was purified by flash silica gel column chromatography [gradient eluent: 10:1~4:1 petroleum ether /EtOAc] to afford  $\alpha$ -sulfonyl amide **2g** (85.4 mg, 0.28 mmol) in 80% yield.

**Condition B:** To an oven-dried tube was added ynamide **1g** (99.9 mg, 0.35 mmol), and *m*-xylene (2.0 mL, ynamide *concn* = 0.175 M) under a nitrogen atmosphere. The vessel was sealed and heated to 140 °C with stirring for 2.5 h. Water (15.8  $\mu\text{L}$ , 0.88 mmol) was then added, and the mixture was stirred at 140 °C for an additional 1 h. After the reaction was determined to be complete by TLC analysis, the reaction mixture was purified by flash silica gel column chromatography [gradient eluent: 10:1~4:1 petroleum ether /EtOAc] to afford  $\alpha$ -sulfonyl amide **2g** (99.0 mg, 0.33 mmol) in 93% yield.

**2g:**  $R_f$  = 0.22 [4:1 petroleum ether/EtOAc]; white solid; mp = 160–161 °C;  $^1\text{H}$  NMR (400 MHz,  $\text{CDCl}_3$ )  $\delta$  8.54 (s, 1H), 7.73 (d, 2H,  $J$  = 8.4 Hz), 7.51 (d, 2H,  $J$  = 7.4 Hz), 7.34 (t, 4H,  $J$  = 7.9 Hz), 7.15 (t, 1H,  $J$  = 7.4 Hz), 4.07 (q, 1H,  $J$  = 7.1 Hz), 2.43 (s, 3H), 1.58 (d, 3H,  $J$  = 7.1 Hz);  $^{13}\text{C}$  NMR (100 MHz,  $\text{CDCl}_3$ )  $\delta$  162.6, 146.0, 137.4, 132.7, 130.2, 129.28, 129.27, 125.2, 120.2, 66.8, 21.9, 12.1; IR (neat) ( $\text{cm}^{-1}$ ) 3313m, 1659s, 1490m, 1342m, 1247w, 1133s, 813s, 766s; HRMS (ESI):  $m/z$  calcd for  $\text{C}_{16}\text{H}_{18}\text{NO}_3\text{S}$  [ $\text{M} + \text{H}$ ] $^{+}$  304.1002, found 304.1006.

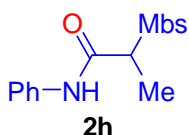

**Condition A:** To a 10 mL Schlenk flask was added ynamide **1h** (105.5 mg, 0.35 mmol), 4CzIPN (2.8 mg, 0.0035 mmol), and *m*-xylene (2.0 mL, ynamide *concn* = 0.175 M) under a nitrogen atmosphere. The reaction mixture was stirred and irradiated for 9 h at a distance of ~3.5 cm (light intensity: 20 mW/cm<sup>2</sup> at 3.5 cm distance) with 30 W blue LEDs (450 nm) at 30 °C. Water (15.8  $\mu\text{L}$ ,

0.88 mmol) was then added, and the mixture was stirred for an additional 1 h. After the reaction was determined to be complete by TLC analysis, the reaction mixture was purified by flash silica gel column chromatography [gradient eluent: 10:1~2:1 petroleum ether /EtOAc] to afford  $\alpha$ -sulfonyl amide **2h** (95.0 mg, 0.30 mmol) in 85% yield.

**Condition B:** To an oven-dried tube was added ynamide **1h** (105.5 mg, 0.35 mmol), and *m*-xylene (2.0 mL, ynamide *concn* = 0.175 M) under a nitrogen atmosphere. The vessel was sealed and heated to 140 °C with stirring for 5 h. Water (15.8  $\mu$ L, 0.88 mmol) was then added, and the mixture was stirred at 140 °C for an additional 1 h. After the reaction was determined to be complete by TLC analysis, the reaction mixture was purified by flash silica gel column chromatography [gradient eluent: 10:1~2:1 petroleum ether /EtOAc] to afford  $\alpha$ -sulfonyl amide **2h** (99.3 mg, 0.31 mmol) in 89% yield.

**2h:**  $R_f$  = 0.35 [2:1 petroleum ether/EtOAc]; white solid; mp = 154–155 °C;  $^1\text{H}$  NMR (400 MHz,  $\text{CDCl}_3$ )  $\delta$  8.53 (s, 1H), 7.77 (d, 2H,  $J$  = 8.9 Hz), 7.52 (d, 2H,  $J$  = 7.5 Hz), 7.35 (t, 2H,  $J$  = 7.8 Hz), 7.16 (t, 1H,  $J$  = 7.3 Hz), 6.99 (d, 2H,  $J$  = 8.9 Hz), 4.06 (q, 1H,  $J$  = 7.0 Hz), 3.86 (s, 3H), 1.59 (d, 3H,  $J$  = 7.1 Hz);  $^{13}\text{C}$  NMR (100 MHz,  $\text{CDCl}_3$ )  $\delta$  164.6, 162.7, 137.4, 131.5, 129.3, 127.0, 125.2, 120.2, 114.8, 66.9, 55.9, 12.1; IR (neat) ( $\text{cm}^{-1}$ ) 3321m, 1659m, 1572w, 1492s, 1264s, 1131s, 806m, 765m; HRMS (ESI):  $m/z$  calcd for  $\text{C}_{16}\text{H}_{18}\text{NO}_4\text{S}$  [ $\text{M} + \text{H}$ ] $^+$  320.0951, found 320.0955.

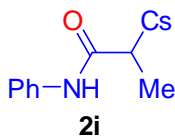

**Condition A:** To a 10 mL Schlenk flask was added ynamide **1i** (107.0 mg, 0.35 mmol), 4CzIPN (2.8 mg, 0.0035 mmol), and *m*-xylene (2.0 mL, ynamide *concn* = 0.175 M) under a nitrogen atmosphere. The reaction mixture was stirred and irradiated for 7.5 h at a distance of ~3.5 cm (light intensity: 20 mW/cm<sup>2</sup> at 3.5 cm distance) with 30 W blue LEDs (450 nm) at 30 °C. Water (15.8  $\mu$ L, 0.88 mmol) was then added, and the mixture was stirred for an additional 2 h. After the reaction was determined to be complete by TLC analysis, the reaction mixture was purified by flash silica gel column chromatography [gradient eluent: 10:1~4:1 petroleum ether /EtOAc] to afford  $\alpha$ -sulfonyl amide **2i** (100.7 mg, 0.31 mmol) in 89% yield.

**Condition B:** To an oven-dried tube was added ynamide **1i** (107.0 mg, 0.35 mmol), and *m*-xylene (2.0 mL, ynamide *concn* = 0.175 M) under a nitrogen atmosphere. The vessel was sealed and heated to 140 °C with stirring for 3 h. Water (15.8  $\mu$ L, 0.88 mmol) was then added, and the mixture was stirred at 140 °C for an additional 0.5 h. After the reaction was determined to be complete by TLC analysis, the reaction mixture was purified by flash silica gel column chromatography [gradient

eluent: 10:1~4:1 petroleum ether /EtOAc] to afford  $\alpha$ -sulfonyl amide **2i** (105.5 mg, 0.33 mmol) in 93% yield.

**2i:**  $R_f$  = 0.22 [4:1 petroleum ether/EtOAc]; white solid; mp = 128–129 °C;  $^1\text{H}$  NMR (400 MHz,  $\text{CDCl}_3$ )  $\delta$  8.41 (s, 1H), 7.78 (d, 2H,  $J$  = 8.6 Hz), 7.52 (dd, 4H,  $J$  = 8.0, 6.0 Hz), 7.36 (t, 2H,  $J$  = 8.0 Hz), 7.18 (t, 1H,  $J$  = 7.4 Hz), 4.08 (q, 1H,  $J$  = 7.1 Hz), 1.59 (d, 3H,  $J$  = 7.1 Hz);  $^{13}\text{C}$  NMR (100 MHz,  $\text{CDCl}_3$ )  $\delta$  162.2, 141.8, 137.2, 134.1, 130.8, 129.9, 129.4, 125.4, 120.2, 66.9, 12.1; IR (neat) ( $\text{cm}^{-1}$ ) 1653m, 1540m, 1444m, 1357w, 1322s, 1149s, 817m, 752s; HRMS (ESI):  $m/z$  calcd for  $\text{C}_{15}\text{H}_{15}\text{ClNO}_3\text{S}$  [ $\text{M} + \text{H}$ ] $^+$  324.0456, found 324.0460.

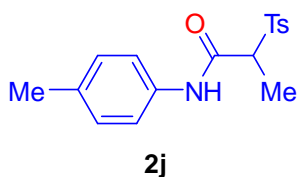

**Condition A:** To a 10 mL Schlenk flask was added ynamide **1j** (104.8 mg, 0.35 mmol), 4CzIPN (2.8 mg, 0.0035 mmol), and *m*-xylene (2.0 mL, ynamide *concn* = 0.175 *M*) under a nitrogen atmosphere. The reaction mixture was stirred and irradiated for 5.5 h at a distance of ~3.5 cm (light intensity: 20 mW/ $\text{cm}^2$  at 3.5 cm distance) with 30 W blue LEDs (450 nm) at 30 °C. Water (15.8  $\mu\text{L}$ , 0.88 mmol) was then added, and the mixture was stirred for an additional 1 h. After the reaction was determined to be complete by TLC analysis, the reaction mixture was purified by flash silica gel column chromatography [gradient eluent: 10:1~2:1 petroleum ether /EtOAc] to afford  $\alpha$ -sulfonyl amide **2j** (98.6 mg, 0.31 mmol) in 89% yield.

**Condition B:** To an oven-dried tube was added ynamide **1j** (104.8 mg, 0.35 mmol), and *m*-xylene (2.0 mL, ynamide *concn* = 0.175 *M*) under a nitrogen atmosphere. The vessel was sealed and heated to 140 °C with stirring for 2.5 h. Water (15.8  $\mu\text{L}$ , 0.88 mmol) was then added, and the mixture was stirred at 140 °C for an additional 1 h. After the reaction was determined to be complete by TLC analysis, the reaction mixture was purified by flash silica gel column chromatography [gradient eluent: 10:1~2:1 petroleum ether /EtOAc] to afford  $\alpha$ -sulfonyl amide **2j** (101.3 mg, 0.32 mmol) in 91% yield.

**2j:**  $R_f$  = 0.43 [2:1 petroleum ether/EtOAc]; white solid; mp = 163–164 °C;  $^1\text{H}$  NMR (400 MHz,  $\text{CDCl}_3$ )  $\delta$  8.49 (s, 1H), 7.72 (d, 2H,  $J$  = 8.0 Hz), 7.36 (dd, 4H,  $J$  = 26.9, 8.0 Hz), 7.13 (d, 2H,  $J$  = 8.0 Hz), 4.07 (q, 1H,  $J$  = 6.9 Hz), 2.42 (s, 3H), 2.32 (s, 3H), 1.57 (d, 3H,  $J$  = 7.1 Hz);  $^{13}\text{C}$  NMR (100 MHz,  $\text{CDCl}_3$ )  $\delta$  162.4, 145.9, 134.83, 134.80, 132.7, 130.1, 129.7, 129.3, 120.2, 66.7, 21.9, 21.1, 12.1; IR (neat) ( $\text{cm}^{-1}$ ) 3345s, 2948w, 1678s, 1512s, 1443w, 1290s, 1143s, 915m; HRMS (ESI):  $m/z$  calcd for  $\text{C}_{17}\text{H}_{20}\text{NO}_3\text{S}$  [ $\text{M} + \text{H}$ ] $^+$  318.1158, found 318.1163.



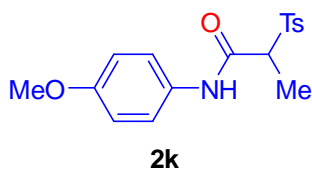

**Condition A:** To a 10 mL Schlenk flask was added ynamide **1k** (110.4 mg, 0.35 mmol), 4CzIPN (2.8 mg, 0.0035 mmol), and *m*-xylene (2.0 mL, ynamide *concn* = 0.175 *M*) under a nitrogen atmosphere. The reaction mixture was stirred and irradiated for 7.5 h at a distance of ~3.5 cm (light intensity: 20 mW/cm<sup>2</sup> at 3.5 cm distance) with 30 W blue LEDs (450 nm) at 30 °C. Water (15.8 μL, 0.88 mmol) was then added, and the mixture was stirred for an additional 1 h. After the reaction was determined to be complete by TLC analysis, the reaction mixture was purified by flash silica gel column chromatography [gradient eluent: 10:1~2:1 petroleum ether /EtOAc] to afford  $\alpha$ -sulfonyl amide **2k** (103.8 mg, 0.31 mmol) in 89% yield.

**Condition B:** To an oven-dried tube was added ynamide **1k** (110.4 mg, 0.35 mmol), and *m*-xylene (2.0 mL, ynamide *concn* = 0.175 *M*) under a nitrogen atmosphere. The vessel was sealed and heated to 140 °C with stirring for 2.5 h. Water (15.8 μL, 0.88 mmol) was then added, and the mixture was stirred at 140 °C for an additional 1 h. After the reaction was determined to be complete by TLC analysis, the reaction mixture was purified by flash silica gel column chromatography [gradient eluent: 10:1~2:1 petroleum ether /EtOAc] to afford  $\alpha$ -sulfonyl amide **2k** (106.2 mg, 0.32 mmol) in 91% yield.

**2k:**  $R_f$  = 0.28 [2:1 petroleum ether/EtOAc]; white solid; mp = 140–141 °C; <sup>1</sup>H NMR (400 MHz, CDCl<sub>3</sub>)  $\delta$  8.51 (s, 1H), 7.73 (d, 2H, *J* = 8.4 Hz), 7.41 (d, 2H, *J* = 9.0 Hz), 7.33 (d, 2H, *J* = 8.1 Hz), 6.84 (d, 2H, *J* = 8.9 Hz), 4.10 (q, 1H, *J* = 7.0 Hz), 3.79 (s, 3H), 2.42 (s, 3H), 1.55 (d, 3H, *J* = 7.1 Hz); <sup>13</sup>C NMR (100 MHz, CDCl<sub>3</sub>)  $\delta$  162.4, 156.9, 145.9, 132.7, 130.5, 130.1, 129.3, 122.0, 114.3, 66.6, 55.6, 21.8, 12.2; IR (neat) (cm<sup>-1</sup>) 3340m, 2946w, 1675s, 1544s, 1411m, 1292s, 918m, 725s; HRMS (ESI): *m/z* calcd for C<sub>17</sub>H<sub>20</sub>NO<sub>4</sub>S [M + H]<sup>+</sup> 334.1108, found 334.1113.

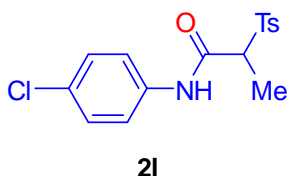

**Condition A:** To a 10 mL Schlenk flask was added ynamide **1l** (111.9 mg, 0.35 mmol), 4CzIPN (2.8 mg, 0.0035 mmol), and *m*-xylene (2.0 mL, ynamide *concn* = 0.175 *M*) under a nitrogen atmosphere. The reaction mixture was stirred and irradiated for 10.5 h at a distance of ~3.5 cm (light intensity: 20 mW/cm<sup>2</sup> at 3.5 cm distance) with 30 W blue LEDs (450 nm) at 30 °C. Water (15.8 μL, 0.88 mmol) was then added, and the mixture was stirred for an additional 1 h. After the reaction was



determined to be complete by TLC analysis, the reaction mixture was purified by flash silica gel column chromatography [gradient eluent: 10:1~2:1 petroleum ether /EtOAc] to afford  $\alpha$ -sulfonyl amide **2l** (92.7 mg, 0.27 mmol) in 78% yield.

**Condition B:** To an oven-dried tube was added ynamide **1l** (111.9 mg, 0.35 mmol), and *m*-xylene (2.0 mL, ynamide *concn* = 0.175 M) under a nitrogen atmosphere. The vessel was sealed and heated to 140 °C with stirring for 2 h. Water (15.8  $\mu$ L, 0.88 mmol) was then added, and the mixture was stirred at 140 °C for an additional 1 h. After the reaction was determined to be complete by TLC analysis, the reaction mixture was purified by flash silica gel column chromatography [gradient eluent: 10:1~2:1 petroleum ether /EtOAc] to afford  $\alpha$ -sulfonyl amide **2l** (98.1 mg, 0.29 mmol) in 83% yield.

**2l:**  $R_f$  = 0.42 [2:1 petroleum ether/EtOAc]; white solid; mp = 179–180 °C;  $^1\text{H}$  NMR (400 MHz,  $\text{CDCl}_3$ )  $\delta$  8.59 (s, 1H), 7.71 (d, 2H,  $J$  = 8.3 Hz), 7.48 (d, 2H,  $J$  = 8.9 Hz), 7.32 (dd, 4H,  $J$  = 19.3, 8.4 Hz), 4.08 (q, 1H,  $J$  = 7.1 Hz), 2.44 (s, 3H), 1.56 (d, 3H,  $J$  = 7.1 Hz);  $^{13}\text{C}$  NMR (100 MHz,  $\text{CDCl}_3$ )  $\delta$  162.6, 146.2, 136.0, 132.6, 130.3, 130.2, 129.3, 129.2, 121.4, 66.7, 21.9, 12.1; IR (neat) ( $\text{cm}^{-1}$ ) 3340m, 1684s, 1535s, 1489m, 1290s, 1142s, 828m, 811m; HRMS (ESI):  $m/z$  calcd for  $\text{C}_{16}\text{H}_{17}\text{ClNO}_3\text{S}$  [ $\text{M} + \text{H}$ ] $^+$  338.0612, found 338.0618.

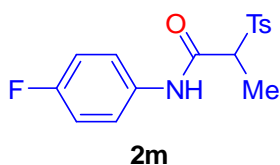

**Condition A:** To a 10 mL Schlenk flask was added ynamide **1m** (106.2 mg, 0.35 mmol), 4CzIPN (2.8 mg, 0.0035 mmol), and *m*-xylene (2.0 mL, ynamide *concn* = 0.175 M) under a nitrogen atmosphere. The reaction mixture was stirred and irradiated for 39 h at a distance of ~3.5 cm (light intensity: 20 mW/cm<sup>2</sup> at 3.5 cm distance) with 30 W blue LEDs (450 nm) at 30 °C. Water (15.8  $\mu$ L, 0.88 mmol) was then added, and the mixture was stirred for an additional 5.5 h. After the reaction was determined to be complete by TLC analysis, the reaction mixture was purified by flash silica gel column chromatography [gradient eluent: 10:1~2:1 petroleum ether /EtOAc] to afford  $\alpha$ -sulfonyl amide **2m** (76.7 mg, 0.24 mmol) in 68% yield.

**Condition B:** To an oven-dried tube was added ynamide **1m** (106.2 mg, 0.35 mmol), and *m*-xylene (2.0 mL, ynamide *concn* = 0.175 M) under a nitrogen atmosphere. The vessel was sealed and heated to 140 °C with stirring for 4.5 h. Water (15.8  $\mu$ L, 0.88 mmol) was then added, and the mixture was stirred at 140 °C for an additional 1 h. After the reaction was determined to be complete by TLC analysis, the reaction mixture was purified by flash silica gel column chromatography [gradient eluent: 10:1~2:1 petroleum ether /EtOAc] to afford  $\alpha$ -sulfonyl amide **2m** (90.0 mg, 0.28

mmol) in 80% yield.

**2m:**  $R_f$  = 0.37 [2:1 petroleum ether/EtOAc]; white solid; mp = 165–166 °C;  $^1\text{H}$  NMR (400 MHz,  $\text{CDCl}_3$ )  $\delta$  8.60 (s, 1H), 7.73 (d, 2H,  $J$  = 8.4 Hz), 7.51–7.45 (m, 2H), 7.35 (d, 2H,  $J$  = 8.1 Hz), 7.02 (t, 2H,  $J$  = 8.7 Hz), 4.11 (q, 1H,  $J$  = 7.1 Hz), 2.44 (s, 3H), 1.56 (d, 3H,  $J$  = 7.1 Hz);  $^{13}\text{C}$  NMR (100 MHz,  $\text{CDCl}_3$ )  $\delta$  162.6, 159.8 (d,  $J_{\text{C-F}}$  = 243.0 Hz), 146.1, 133.4 (d,  $J_{\text{C-F}}$  = 2.9 Hz), 132.6, 130.2, 129.3, 122.0 (d,  $J_{\text{C-F}}$  = 8.0 Hz), 115.9 (d,  $J_{\text{C-F}}$  = 22.4 Hz), 66.6, 21.9, 12.2;  $^{19}\text{F}$  NMR (376 MHz,  $\text{CDCl}_3$ )  $\delta$  -117.0; IR (neat) ( $\text{cm}^{-1}$ ) 3354m, 2951w, 1678s, 1507s, 1344m, 1223m, 915m, 727s; HRMS (ESI):  $m/z$  calcd for  $\text{C}_{16}\text{H}_{17}\text{FNO}_3\text{S}$  [ $\text{M} + \text{H}$ ] $^+$  322.0908, found 322.0913.

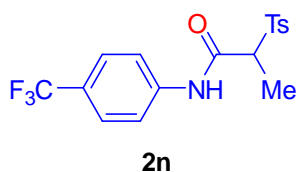

**Condition A:** To a 10 mL Schlenk flask was added ynamide **1n** (123.7 mg, 0.35 mmol), 4CzIPN (2.8 mg, 0.0035 mmol), and *m*-xylene (2.0 mL, ynamide *concn* = 0.175 *M*) under a nitrogen atmosphere. The reaction mixture was stirred and irradiated for 24 h at a distance of ~3.5 cm (light intensity: 20 mW/cm<sup>2</sup> at 3.5 cm distance) with 30 W blue LEDs (450 nm) at 30 °C. Water (15.8  $\mu\text{L}$ , 0.88 mmol) was then added, and the mixture was stirred for an additional 1 h. After the reaction was determined to be complete by TLC analysis, the reaction mixture was purified by flash silica gel column chromatography [gradient eluent: 10:1~4:1 petroleum ether /EtOAc] to afford  $\alpha$ -sulfonyl amide **2n** (86.8 mg, 0.23 mmol) in 67% yield.

**Condition B:** To an oven-dried tube was added ynamide **1n** (123.7 mg, 0.35 mmol), and *m*-xylene (2.0 mL, ynamide *concn* = 0.175 *M*) under a nitrogen atmosphere. The vessel was sealed and heated to 140 °C with stirring for 2.5 h. Water (15.8  $\mu\text{L}$ , 0.88 mmol) was then added, and the mixture was stirred at 140 °C for an additional 2 h. After the reaction was determined to be complete by TLC analysis, the reaction mixture was purified by flash silica gel column chromatography [gradient eluent: 10:1~4:1 petroleum ether /EtOAc] to afford  $\alpha$ -sulfonyl amide **2n** (101.2 mg, 0.27 mmol) in 78% yield.

**2n:**  $R_f$  = 0.25 [4:1 petroleum ether/EtOAc]; white solid; mp = 164–165 °C;  $^1\text{H}$  NMR (400 MHz,  $\text{CDCl}_3$ )  $\delta$  8.80 (s, 1H), 7.72 (d, 2H,  $J$  = 8.3 Hz), 7.68–7.57 (m, 4H), 7.36 (d, 2H,  $J$  = 8.0 Hz), 4.14 (q, 1H,  $J$  = 7.1 Hz), 2.45 (s, 3H), 1.57 (d, 3H,  $J$  = 7.0 Hz);  $^{13}\text{C}$  NMR (100 MHz,  $\text{CDCl}_3$ )  $\delta$  162.9, 146.3, 140.4, 132.4, 130.3, 129.3, 126.9 (q,  $J_{\text{C-F}}$  = 32.7 Hz), 126.5 (q,  $J_{\text{C-F}}$  = 3.8 Hz), 124.1 (q,  $J_{\text{C-F}}$  = 270.1 Hz), 119.8, 66.8, 21.9, 12.1;  $^{19}\text{F}$  NMR (376 MHz,  $\text{CDCl}_3$ )  $\delta$  -62.2; IR (neat) ( $\text{cm}^{-1}$ ) 3322m, 2961w,

1671s, 1546s, 1368m, 1260s, 1149s, 813s; HRMS (ESI):  $m/z$  calcd for  $C_{17}H_{17}F_3NO_3S$   $[M + H]^+$  372.0876, found 372.0882.

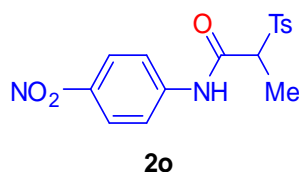

**Condition A:** To a 10 mL Schlenk flask was added ynamide **1o** (115.6 mg, 0.35 mmol), 4CzIPN (2.8 mg, 0.0035 mmol), and *m*-xylene (2.0 mL, ynamide *concn* = 0.175 M) under a nitrogen atmosphere. The reaction mixture was stirred and irradiated for 16 h at a distance of ~3.5 cm (light intensity: 20 mW/cm<sup>2</sup> at 3.5 cm distance) with 30 W blue LEDs (450 nm) at 30 °C. Water (15.8 μL, 0.88 mmol) was then added, and the mixture was stirred for an additional 1 h. After the reaction was determined to be complete by TLC analysis, the reaction mixture was purified by flash silica gel column chromatography [gradient eluent: 10:1~2:1 petroleum ether /EtOAc] to afford  $\alpha$ -sulfonyl amide **2o** (77.0 mg, 0.22 mmol) in 63% yield.

**Condition B:** To an oven-dried tube was added ynamide **1o** (115.6 mg, 0.35 mmol), and *m*-xylene (2.0 mL, ynamide *concn* = 0.175 M) under a nitrogen atmosphere. The vessel was sealed and heated to 140 °C with stirring for 17.5 h. Water (15.8 μL, 0.88 mmol) was then added, and the mixture was stirred at 140 °C for an additional 1 h. After the reaction was determined to be complete by TLC analysis, the reaction mixture was purified by flash silica gel column chromatography [gradient eluent: 10:1~2:1 petroleum ether /EtOAc] to afford  $\alpha$ -sulfonyl amide **2o** (46.7 mg, 0.13 mmol) in 36% yield.

**2o:**  $R_f$  = 0.28 [2:1 petroleum ether/EtOAc]; white solid; mp = 199–200 °C; <sup>1</sup>H NMR (400 MHz, CDCl<sub>3</sub>)  $\delta$  8.99 (s, 1H), 8.24 (d, 2H,  $J$  = 9.2 Hz), 7.73 (dd, 4H,  $J$  = 10.8, 8.7 Hz), 7.37 (d, 2H,  $J$  = 7.8 Hz), 4.15 (q, 1H,  $J$  = 7.0 Hz), 2.46 (s, 3H), 1.57 (d, 3H,  $J$  = 7.1 Hz); <sup>13</sup>C NMR (100 MHz, CDCl<sub>3</sub>)  $\delta$  163.1, 146.5, 144.2, 143.1, 132.3, 130.4, 129.2, 125.3, 119.7, 66.8, 22.0, 12.1; IR (neat) (cm<sup>-1</sup>) 3338m, 1699s, 1559m, 1408w, 1225m, 1138m, 857m, 736m; HRMS (ESI):  $m/z$  calcd for  $C_{16}H_{17}N_2O_5S$   $[M + H]^+$  349.0853, found 349.0858.

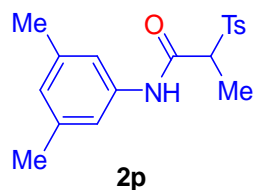

**Condition A:** To a 10 mL Schlenk flask was added ynamide **1p** (109.7 mg, 0.35 mmol), 4CzIPN (2.8 mg, 0.0035 mmol), and *m*-xylene (2.0 mL, ynamide *concn* = 0.175 M) under a nitrogen

atmosphere. The reaction mixture was stirred and irradiated for 8 h at a distance of ~3.5 cm (light intensity: 20 mW/cm<sup>2</sup> at 3.5 cm distance) with 30 W blue LEDs (450 nm) at 30 °C. Water (15.8 µL, 0.88 mmol) was then added, and the mixture was stirred for an additional 2 h. After the reaction was determined to be complete by TLC analysis, the reaction mixture was purified by flash silica gel column chromatography [gradient eluent: 10:1~4:1 petroleum ether /EtOAc] to afford  $\alpha$ -sulfonyl amide **2p** (102.4 mg, 0.31 mmol) in 88% yield.

**Condition B:** To an oven-dried tube was added ynamide **1p** (109.7 mg, 0.35 mmol), and *m*-xylene (2.0 mL, ynamide *concn* = 0.175 M) under a nitrogen atmosphere. The vessel was sealed and heated to 140 °C with stirring for 2 h. Water (15.8 µL, 0.88 mmol) was then added, and the mixture was stirred at 140 °C for an additional 1 h. After the reaction was determined to be complete by TLC analysis, the reaction mixture was purified by flash silica gel column chromatography [gradient eluent: 10:1~4:1 petroleum ether /EtOAc] to afford  $\alpha$ -sulfonyl amide **2p** (112.2 mg, 0.34 mmol) in 97% yield.

**2p:**  $R_f$  = 0.26 [4:1 petroleum ether/EtOAc]; white solid; mp = 172–173 °C; <sup>1</sup>H NMR (400 MHz, CDCl<sub>3</sub>)  $\delta$  8.42 (s, 1H), 7.72 (d, 2H,  $J$  = 8.3 Hz), 7.33 (d, 2H,  $J$  = 8.0 Hz), 7.15 (s, 2H), 6.80 (s, 1H), 4.02 (q, 1H,  $J$  = 7.1 Hz), 2.43 (s, 3H), 2.30 (s, 6H), 1.58 (d, 3H,  $J$  = 7.1 Hz); <sup>13</sup>C NMR (100 MHz, CDCl<sub>3</sub>)  $\delta$  162.4, 146.0, 139.0, 137.2, 132.8, 130.2, 129.2, 126.9, 117.9, 66.8, 21.9, 21.5, 12.0; IR (neat) (cm<sup>-1</sup>) 3345m, 2954w, 1686m, 1586s, 1310m, 1206w, 848s, 724w; HRMS (ESI):  $m/z$  calcd for C<sub>18</sub>H<sub>22</sub>NO<sub>3</sub>S [M + H]<sup>+</sup> 332.1315, found 332.1320.

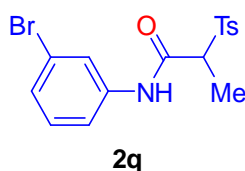

**Condition A:** To a 10 mL Schlenk flask was added ynamide **1q** (127.5 mg, 0.35 mmol), 4CzIPN (2.8 mg, 0.0035 mmol), and *m*-xylene (2.0 mL, ynamide *concn* = 0.175 M) under a nitrogen atmosphere. The reaction mixture was stirred and irradiated for 21 h at a distance of ~3.5 cm (light intensity: 20 mW/cm<sup>2</sup> at 3.5 cm distance) with 30 W blue LEDs (450 nm) at 30 °C. Water (15.8 µL, 0.88 mmol) was then added, and the mixture was stirred for an additional 1 h. After the reaction was determined to be complete by TLC analysis, the reaction mixture was purified by flash silica gel column chromatography [gradient eluent: 10:1~4:1 petroleum ether /EtOAc] to afford  $\alpha$ -sulfonyl amide **2q** (103.4 mg, 0.27 mmol) in 77% yield.

**Condition B:** To an oven-dried tube was added ynamide **1q** (127.5 mg, 0.35 mmol), and *m*-xylene (2.0 mL, ynamide *concn* = 0.175 M) under a nitrogen atmosphere. The vessel was sealed and heated

to 140 °C with stirring for 4 h. Water (15.8  $\mu$ L, 0.88 mmol) was then added, and the mixture was stirred at 140 °C for an additional 1 h. After the reaction was determined to be complete by TLC analysis, the reaction mixture was purified by flash silica gel column chromatography [gradient eluent: 10:1~4:1 petroleum ether /EtOAc] to afford  $\alpha$ -sulfonyl amide **2q** (117.9 mg, 0.31 mmol) in 88% yield.

**2q:**  $R_f$  = 0.20 [4:1 petroleum ether/EtOAc]; white solid; mp = 136–137 °C;  $^1\text{H}$  NMR (400 MHz,  $\text{CDCl}_3$ )  $\delta$  8.71 (s, 1H), 7.80 (t, 1H,  $J$  = 2.0 Hz), 7.74 (d, 2H,  $J$  = 8.3 Hz), 7.41 (d, 1H,  $J$  = 8.1 Hz), 7.36 (d, 2H,  $J$  = 8.1 Hz), 7.25 (d, 1H,  $J$  = 8.4 Hz), 7.16 (t, 1H,  $J$  = 8.0 Hz), 4.16 (q, 1H,  $J$  = 7.1 Hz), 2.45 (s, 3H), 1.54 (d, 3H,  $J$  = 7.1 Hz);  $^{13}\text{C}$  NMR (100 MHz,  $\text{CDCl}_3$ )  $\delta$  162.8, 146.2, 138.7, 132.4, 130.5, 130.2, 129.3, 128.0, 123.1, 122.8, 118.6, 66.7, 21.9, 12.2; IR (neat) ( $\text{cm}^{-1}$ ) 3340m, 2953w, 1589s, 1445w, 1339m, 1142s, 864m, 776m; HRMS (ESI):  $m/z$  calcd for  $\text{C}_{16}\text{H}_{17}\text{BrNO}_3\text{S}$  [ $\text{M} + \text{H}$ ] $^+$  382.0107, found 382.0114.

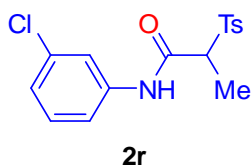

**Condition A:** To a 10 mL Schlenk flask was added ynamide **1r** (111.9 mg, 0.35 mmol), 4CzIPN (2.8 mg, 0.0035 mmol), and *m*-xylene (2.0 mL, ynamide *concn* = 0.175 *M*) under a nitrogen atmosphere. The reaction mixture was stirred and irradiated for 13 h at a distance of ~3.5 cm (light intensity: 20 mW/cm<sup>2</sup> at 3.5 cm distance) with 30 W blue LEDs (450 nm) at 30 °C. Water (15.8  $\mu$ L, 0.88 mmol) was then added, and the mixture was stirred for an additional 1 h. After the reaction was determined to be complete by TLC analysis, the reaction mixture was purified by flash silica gel column chromatography [gradient eluent: 10:1~4:1 petroleum ether /EtOAc] to afford  $\alpha$ -sulfonyl amide **2r** (84.3 mg, 0.25 mmol) in 71% yield.

**Condition B:** To an oven-dried tube was added ynamide **1r** (111.9 mg, 0.35 mmol), and *m*-xylene (2.0 mL, ynamide *concn* = 0.175 *M*) under a nitrogen atmosphere. The vessel was sealed and heated to 140 °C with stirring for 3.5 h. Water (15.8  $\mu$ L, 0.88 mmol) was then added, and the mixture was stirred at 140 °C for an additional 1 h. After the reaction was determined to be complete by TLC analysis, the reaction mixture was purified by flash silica gel column chromatography [gradient eluent: 10:1~4:1 petroleum ether /EtOAc] to afford  $\alpha$ -sulfonyl amide **2r** (85.9 mg, 0.25 mmol) in 73% yield.

**2r:**  $R_f$  = 0.25 [4:1 petroleum ether/EtOAc]; white solid; mp = 137–138 °C;  $^1\text{H}$  NMR (400 MHz,  $\text{CDCl}_3$ )  $\delta$  8.67 (s, 1H), 7.73 (d, 2H,  $J$  = 8.3 Hz), 7.66 (t, 1H,  $J$  = 2.1 Hz), 7.36 (d, 3H,  $J$  = 8.4 Hz), 7.23 (d, 1H,  $J$  = 8.1 Hz), 7.12 (d, 1H,  $J$  = 8.0 Hz), 4.13 (q, 1H,  $J$  = 7.0 Hz), 2.45 (s, 3H), 1.56 (d, 3H,

$J = 7.1$  Hz);  $^{13}\text{C}$  NMR (100 MHz,  $\text{CDCl}_3$ )  $\delta$  162.7, 146.2, 138.5, 134.9, 132.5, 130.3, 130.2, 129.3, 125.2, 120.3, 118.1, 66.7, 21.9, 12.1; IR (neat) ( $\text{cm}^{-1}$ ) 3344m, 1686s, 1536m, 1478w, 1338w, 1144s, 809m, 738s; HRMS (ESI):  $m/z$  calcd for  $\text{C}_{16}\text{H}_{17}\text{ClNO}_3\text{S}$   $[\text{M} + \text{H}]^+$  338.0612, found 338.0618.

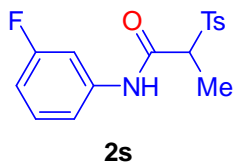

**Condition A:** To a 10 mL Schlenk flask was added ynamide **1s** (106.2 mg, 0.35 mmol), 4CzIPN (2.8 mg, 0.0035 mmol), and *m*-xylene (2.0 mL, ynamide *concn* = 0.175 M) under a nitrogen atmosphere. The reaction mixture was stirred and irradiated for 13 h at a distance of ~3.5 cm (light intensity: 20 mW/cm<sup>2</sup> at 3.5 cm distance) with 30 W blue LEDs (450 nm) at 30 °C. Water (15.8  $\mu\text{L}$ , 0.88 mmol) was then added, and the mixture was stirred for an additional 1 h. After the reaction was determined to be complete by TLC analysis, the reaction mixture was purified by flash silica gel column chromatography [gradient eluent: 10:1~2:1 petroleum ether /EtOAc] to afford  $\alpha$ -sulfonyl amide **2s** (85.6 mg, 0.27 mmol) in 76% yield.

**Condition B:** To an oven-dried tube was added ynamide **1s** (106.2 mg, 0.35 mmol), and *m*-xylene (2.0 mL, ynamide *concn* = 0.175 M) under a nitrogen atmosphere. The vessel was sealed and heated to 140 °C with stirring for 3 h. Water (15.8  $\mu\text{L}$ , 0.88 mmol) was then added, and the mixture was stirred at 140 °C for an additional 1 h. After the reaction was determined to be complete by TLC analysis, the reaction mixture was purified by flash silica gel column chromatography [gradient eluent: 10:1~2:1 petroleum ether /EtOAc] to afford  $\alpha$ -sulfonyl amide **2s** (87.9 mg, 0.27 mmol) in 78% yield.

**2s:**  $R_f$  = 0.42 [2:1 petroleum ether/EtOAc]; white solid; mp = 123–124 °C;  $^1\text{H}$  NMR (400 MHz,  $\text{CDCl}_3$ )  $\delta$  8.73 (s, 1H), 7.73 (d, 2H,  $J$  = 8.3 Hz), 7.48 (dt, 1H,  $J$  = 10.8, 2.3 Hz), 7.35 (d, 2H,  $J$  = 8.1 Hz), 7.27 (d, 1H,  $J$  = 8.4 Hz), 7.18 (d, 1H,  $J$  = 8.1 Hz), 6.86–6.81 (m, 1H), 4.15 (dd, 1H,  $J$  = 7.0, 2.4 Hz), 2.44 (s, 3H), 1.55 (d, 3H,  $J$  = 7.2 Hz);  $^{13}\text{C}$  NMR (100 MHz,  $\text{CDCl}_3$ )  $\delta$  163.0 (d,  $J_{\text{C-F}}$  = 243.6 Hz), 162.8, 146.2, 138.9 (d,  $J_{\text{C-F}}$  = 10.7 Hz), 132.4, 130.3 (d,  $J_{\text{C-F}}$  = 9.2 Hz), 130.2, 129.3, 115.4 (d,  $J_{\text{C-F}}$  = 2.9 Hz), 111.8 (d,  $J_{\text{C-F}}$  = 21.1 Hz), 107.7 (d,  $J_{\text{C-F}}$  = 26.3 Hz), 66.7, 21.9, 12.2;  $^{19}\text{F}$  NMR (376 MHz,  $\text{CDCl}_3$ )  $\delta$  -111.2; IR (neat) ( $\text{cm}^{-1}$ ) 1658s, 1543m, 1356w, 1230w, 1144s, 865w, 779m, 707m; HRMS (ESI):  $m/z$  calcd for  $\text{C}_{16}\text{H}_{17}\text{FNO}_3\text{S}$   $[\text{M} + \text{H}]^+$  322.0908, found 322.0913.

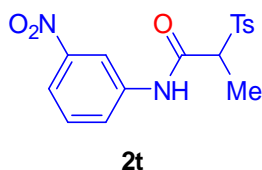

**Condition A:** To a 10 mL Schlenk flask was added ynamide **1t** (115.6 mg, 0.35 mmol), 4CzIPN (2.8 mg, 0.0035 mmol), and *m*-xylene (2.0 mL, ynamide *concn* = 0.175 M) under a nitrogen atmosphere. The reaction mixture was stirred and irradiated for 14 h at a distance of ~3.5 cm (light intensity: 20 mW/cm<sup>2</sup> at 3.5 cm distance) with 30 W blue LEDs (450 nm) at 30 °C. Water (15.8 µL, 0.88 mmol) was then added, and the mixture was stirred for an additional 5 h. After the reaction was determined to be complete by TLC analysis, the reaction mixture was purified by flash silica gel column chromatography [gradient eluent: 10:1~2:1 petroleum ether /EtOAc] to afford  $\alpha$ -sulfonyl amide **2t** (85.7 mg, 0.25 mmol) in 70% yield.

**Condition B:** To an oven-dried tube was added ynamide **1t** (115.6 mg, 0.35 mmol), and *m*-xylene (2.0 mL, ynamide *concn* = 0.175 M) under a nitrogen atmosphere. The vessel was sealed and heated to 140 °C with stirring for 22 h. Water (15.8 µL, 0.88 mmol) was then added, and the mixture was stirred at 140 °C for an additional 1 h. After the reaction was determined to be complete by TLC analysis, the reaction mixture was purified by flash silica gel column chromatography [gradient eluent: 10:1~2:1 petroleum ether /EtOAc] to afford  $\alpha$ -sulfonyl amide **2t** (41.7 mg, 0.12 mmol) in 34% yield.

**2t:**  $R_f$  = 0.28 [2:1 petroleum ether/EtOAc]; white solid; mp = 194–195 °C; <sup>1</sup>H NMR (400 MHz, CDCl<sub>3</sub>)  $\delta$  8.95 (s, 1H), 8.46 (t, 1H,  $J$  = 2.2 Hz), 7.99 (dd, 1H,  $J$  = 8.3, 1.3 Hz), 7.89 (dd, 1H,  $J$  = 8.1, 1.2 Hz), 7.75 (d, 2H,  $J$  = 8.4 Hz), 7.51 (t, 1H,  $J$  = 8.2 Hz), 7.38 (d, 2H,  $J$  = 8.1 Hz), 4.16 (q, 1H,  $J$  = 7.1 Hz), 2.46 (s, 3H), 1.58 (d, 3H,  $J$  = 7.1 Hz); <sup>13</sup>C NMR (100 MHz, CDCl<sub>3</sub>)  $\delta$  163.1, 148.7, 146.4, 138.5, 132.4, 130.4, 130.1, 129.3, 125.7, 119.7, 115.0, 66.7, 22.0, 12.2; IR (neat) (cm<sup>-1</sup>) 3328m, 2927w, 1687m, 1529s, 1291m, 1144s, 737s, 675m; HRMS (ESI):  $m/z$  calcd for C<sub>16</sub>H<sub>17</sub>N<sub>2</sub>O<sub>5</sub>S [M + H]<sup>+</sup> 349.0853, found 349.0859.

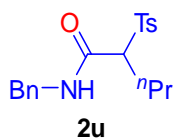

**Condition A:** To a 10 mL Schlenk flask was added ynamide **1u** (114.6 mg, 0.35 mmol), 4CzIPN (2.8 mg, 0.0035 mmol), and *m*-xylene (2.0 mL, ynamide *concn* = 0.175 M) under a nitrogen atmosphere. The reaction mixture was stirred and irradiated for 6.5 h at a distance of ~3.5 cm (light intensity: 20 mW/cm<sup>2</sup> at 3.5 cm distance) with 30 W blue LEDs (450 nm) at 30 °C. Water (15.8 µL, 0.88 mmol) was then added, and the mixture was stirred for an additional 1 h. After the reaction was determined to be complete by TLC analysis, the reaction mixture was purified by flash silica gel column chromatography [gradient eluent: 10:1~4:1 petroleum ether /EtOAc] to afford  $\alpha$ -sulfonyl amide **2u** (117.7 mg, 0.34 mmol) in 97% yield.



**Condition B:** To an oven-dried tube was added ynamide **1u** (114.6 mg, 0.35 mmol), and *m*-xylene (2.0 mL, ynamide *concn* = 0.175 M) under a nitrogen atmosphere. The vessel was sealed and heated to 140 °C with stirring for 4.5 h. Water (15.8 µL, 0.88 mmol) was then added, and the mixture was stirred at 140 °C for an additional 1 h. After the reaction was determined to be complete by TLC analysis, the reaction mixture was purified by flash silica gel column chromatography [gradient eluent: 10:1~4:1 petroleum ether /EtOAc] to afford  $\alpha$ -sulfonyl amide **2u** (103.4 mg, 0.30 mmol) in 86% yield.

**2u:**  $R_f$  = 0.29 [4:1 petroleum ether/EtOAc]; white solid; mp = 155–156 °C;  $^1\text{H}$  NMR (400 MHz,  $\text{CDCl}_3$ )  $\delta$  7.59 (d, 2H,  $J$  = 8.4 Hz), 7.38-7.25 (m, 7H), 6.84 (t, 1H,  $J$  = 6.7 Hz), 4.43 (d, 2H,  $J$  = 5.9 Hz), 3.76 (dd, 1H,  $J$  = 11.1, 3.8 Hz), 2.43 (s, 3H), 2.03-1.85 (m, 2H), 1.46-1.28 (m, 2H), 0.92 (t, 3H,  $J$  = 7.3 Hz);  $^{13}\text{C}$  NMR (100 MHz,  $\text{CDCl}_3$ )  $\delta$  164.3, 145.5, 137.6, 133.6, 129.9, 129.1, 128.9, 128.2, 127.8, 71.4, 44.2, 28.9, 21.9, 20.4, 13.8; IR (neat) ( $\text{cm}^{-1}$ ) 2956m, 1638s, 1597w, 1437w, 1318s, 1147s, 811m, 746s; HRMS (ESI):  $m/z$  calcd for  $\text{C}_{19}\text{H}_{24}\text{NO}_3\text{S}$  [ $\text{M} + \text{H}$ ] $^+$  346.1471, found 346.1475.

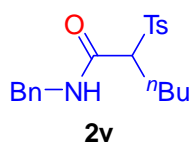

**Condition A:** To a 10 mL Schlenk flask was added ynamide **1v** (119.5 mg, 0.35 mmol), 4CzIPN (2.8 mg, 0.0035 mmol), and *m*-xylene (2.0 mL, ynamide *concn* = 0.175 M) under a nitrogen atmosphere. The reaction mixture was stirred and irradiated for 5 h at a distance of ~3.5 cm (light intensity: 20 mW/cm<sup>2</sup> at 3.5 cm distance) with 30 W blue LEDs (450 nm) at 30 °C. Water (15.8 µL, 0.88 mmol) was then added, and the mixture was stirred for an additional 1.5 h. After the reaction was determined to be complete by TLC analysis, the reaction mixture was purified by flash silica gel column chromatography [gradient eluent: 10:1~4:1 petroleum ether /EtOAc] to afford  $\alpha$ -sulfonyl amide **2v** (115.6 mg, 0.32 mmol) in 92% yield.

**Condition B:** To an oven-dried tube was added ynamide **1v** (119.5 mg, 0.35 mmol), and *m*-xylene (2.0 mL, ynamide *concn* = 0.175 M) under a nitrogen atmosphere. The vessel was sealed and heated to 140 °C with stirring for 4 h. Water (15.8 µL, 0.88 mmol) was then added, and the mixture was stirred at 140 °C for an additional 0.5 h. After the reaction was determined to be complete by TLC analysis, the reaction mixture was purified by flash silica gel column chromatography [gradient eluent: 10:1~4:1 petroleum ether /EtOAc] to afford  $\alpha$ -sulfonyl amide **2v** (106.4 mg, 0.30 mmol) in 85% yield.

**2v:**  $R_f$  = 0.30 [4:1 petroleum ether/EtOAc]; white solid;  $^1\text{H}$  NMR (400 MHz,  $\text{CDCl}_3$ )  $\delta$  7.59 (d, 2H,  $J$  = 8.3 Hz), 7.36-7.25 (m, 7H), 6.78 (t, 1H,  $J$  = 5.9 Hz), 4.43 (d, 2H,  $J$  = 5.9 Hz), 3.73 (dd, 1H,  $J$  =



11.2, 3.7 Hz), 2.43 (s, 3H), 2.08-2.00 (m, 1H), 1.95-1.85 (m, 1H), 1.39-1.28 (m, 4H), 0.87 (t, 3H,  $J = 6.7$  Hz);  $^{13}\text{C}$  NMR (100 MHz,  $\text{CDCl}_3$ )  $\delta$  164.4, 145.6, 137.6, 133.7, 130.0, 129.1, 128.9, 128.3, 127.9, 71.6, 44.2, 29.1, 26.6, 22.4, 21.9, 13.9. Spectral data are in agreement with literature values<sup>18</sup>.

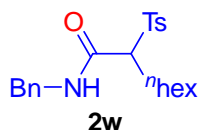

**Condition A:** To a 10 mL Schlenk flask was added ynamide **1w** (129.3 mg, 0.35 mmol), 4CzIPN (2.8 mg, 0.0035 mmol), and *m*-xylene (2.0 mL, ynamide *concn* = 0.175 M) under a nitrogen atmosphere. The reaction mixture was stirred and irradiated for 6.5 h at a distance of ~3.5 cm (light intensity: 20 mW/cm<sup>2</sup> at 3.5 cm distance) with 30 W blue LEDs (450 nm) at 30 °C. Water (15.8  $\mu\text{L}$ , 0.88 mmol) was then added, and the mixture was stirred for an additional 1 h. After the reaction was determined to be complete by TLC analysis, the reaction mixture was purified by flash silica gel column chromatography [gradient eluent: 10:1~4:1 petroleum ether /EtOAc] to afford  $\alpha$ -sulfonyl amide **2w** (102.3 mg, 0.26 mmol) in 75% yield.

**Condition B:** To an oven-dried tube was added ynamide **1w** (129.3 mg, 0.35 mmol), and *m*-xylene (2.0 mL, ynamide *concn* = 0.175 M) under a nitrogen atmosphere. The vessel was sealed and heated to 140 °C with stirring for 4.5 h. Water (15.8  $\mu\text{L}$ , 0.88 mmol) was then added, and the mixture was stirred at 140 °C for an additional 1 h. After the reaction was determined to be complete by TLC analysis, the reaction mixture was purified by flash silica gel column chromatography [gradient eluent: 10:1~4:1 petroleum ether /EtOAc] to afford  $\alpha$ -sulfonyl amide **2w** (119.4 mg, 0.31 mmol) in 88% yield.

**2w:**  $R_f$  = 0.35 [4:1 petroleum ether/EtOAc]; colorless oil;  $^1\text{H}$  NMR (400 MHz,  $\text{CDCl}_3$ )  $\delta$  7.59 (d, 2H,  $J = 8.3$  Hz), 7.38-7.25 (m, 7H), 6.79 (t, 1H,  $J = 5.9$  Hz), 4.43 (d, 2H,  $J = 5.9$  Hz), 3.73 (dd, 1H,  $J = 11.1, 3.8$  Hz), 2.43 (s, 3H), 2.06-1.98 (m, 1H), 1.94-1.84 (m, 1H), 1.37-1.20 (m, 8H), 0.85 (t, 3H,  $J = 6.8$  Hz);  $^{13}\text{C}$  NMR (100 MHz,  $\text{CDCl}_3$ )  $\delta$  164.3, 145.5, 137.6, 133.7, 130.0, 129.1, 128.9, 128.2, 127.9, 71.6, 44.2, 31.5, 28.9, 27.0, 26.9, 22.6, 21.9, 14.2. Spectral data are in agreement with literature values<sup>18</sup>.

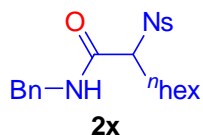

**Condition A:** To a 10 mL Schlenk flask was added ynamide **1x** (140.2 mg, 0.35 mmol), 4CzIPN (2.8 mg, 0.0035 mmol), and *m*-xylene (2.0 mL, ynamide *concn* = 0.175 M) under a nitrogen atmosphere. The reaction mixture was stirred and irradiated for 5 h at a distance of ~3.5 cm (light

intensity: 20 mW/cm<sup>2</sup> at 3.5 cm distance) with 30 W blue LEDs (450 nm) at 30 °C. Water (15.8 μL, 0.88 mmol) was then added, and the mixture was stirred for an additional 1 h. After the reaction was determined to be complete by TLC analysis, the reaction mixture was purified by flash silica gel column chromatography [gradient eluent: 10:1~4:1 petroleum ether /EtOAc] to afford  $\alpha$ -sulfonyl amide **2x** (141.6 mg, 0.34 mmol) in 97% yield.

**Condition B:** To an oven-dried tube was added ynamide **1x** (140.2 mg, 0.35 mmol), and *m*-xylene (2.0 mL, ynamide *concn* = 0.175 M) under a nitrogen atmosphere. The vessel was sealed and heated to 140 °C with stirring for 12 h. Water (15.8 μL, 0.88 mmol) was then added, and the mixture was stirred at 140 °C for an additional 1 h. After the reaction was determined to be complete by TLC analysis, the reaction mixture was purified by flash silica gel column chromatography [gradient eluent: 10:1~4:1 petroleum ether /EtOAc] to afford  $\alpha$ -sulfonyl amide **2x** (53.0 mg, 0.13 mmol) in 36% yield.

**2x:**  $R_f$  = 0.38 [4:1 petroleum ether/EtOAc]; white solid; mp = 157–158 °C; <sup>1</sup>H NMR (400 MHz, CDCl<sub>3</sub>)  $\delta$  8.25 (d, 2H,  $J$  = 8.8 Hz), 7.84 (d, 2H,  $J$  = 8.8 Hz), 7.40-7.28 (m, 5H), 6.76 (t, 1H,  $J$  = 6.0 Hz), 4.43 (d, 2H,  $J$  = 6.0 Hz), 3.81 (dd, 1H,  $J$  = 11.4, 3.6 Hz), 2.10-2.01 (m, 1H), 1.91-1.81 (m, 1H), 1.35-1.21 (m, 8H), 0.86 (t, 3H,  $J$  = 6.8 Hz); <sup>13</sup>C NMR (100 MHz, CDCl<sub>3</sub>)  $\delta$  163.7, 151.1, 141.9, 137.4, 130.9, 129.0, 128.4, 128.1, 124.3, 71.9, 44.4, 31.5, 28.9, 26.95, 26.85, 22.6, 14.2; IR (neat) (cm<sup>-1</sup>) 3353m, 2923w, 1669s, 1525s, 1348m, 1144s, 854m, 748m; HRMS (ESI):  $m/z$  calcd for C<sub>21</sub>H<sub>27</sub>N<sub>2</sub>O<sub>5</sub>S [M + H]<sup>+</sup> 419.1635, found 419.1643.

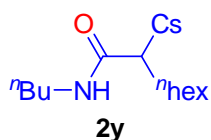

**Condition A:** To a 10 mL Schlenk flask was added ynamide **1y** (124.6 mg, 0.35 mmol), 4CzIPN (2.8 mg, 0.0035 mmol), and *m*-xylene (2.0 mL, ynamide *concn* = 0.175 M) under a nitrogen atmosphere. The reaction mixture was stirred and irradiated for 17 h at a distance of ~3.5 cm (light intensity: 20 mW/cm<sup>2</sup> at 3.5 cm distance) with 30 W blue LEDs (450 nm) at 30 °C. Water (15.8 μL, 0.88 mmol) was then added, and the mixture was stirred for an additional 5.5 h. After the reaction was determined to be complete by TLC analysis, the reaction mixture was purified by flash silica gel column chromatography [isocratic eluent: 10:1 petroleum ether /EtOAc] to afford  $\alpha$ -sulfonyl amide **2y** (83.8 mg, 0.22 mmol) in 64% yield.

**Condition B:** To an oven-dried tube was added ynamide **1y** (124.6 mg, 0.35 mmol), and *m*-xylene (2.0 mL, ynamide *concn* = 0.175 M) under a nitrogen atmosphere. The vessel was sealed and heated to 140 °C with stirring for 2 h. Water (15.8 μL, 0.88 mmol) was then added, and the mixture was

stirred at 140 °C for an additional 4 h. After the reaction was determined to be complete by TLC analysis, the reaction mixture was purified by flash silica gel column chromatography [isocratic eluent: 10:1 petroleum ether /EtOAc] to afford  $\alpha$ -sulfonyl amide **2y** (79.7 mg, 0.21 mmol) in 61% yield.

**2y:**  $R_f$  = 0.18 [10:1 petroleum ether/EtOAc]; white solid; mp = 125–126 °C;  $^1\text{H}$  NMR (400 MHz,  $\text{CDCl}_3$ )  $\delta$  7.77 (d, 2H,  $J$  = 8.6 Hz), 7.53 (d, 2H,  $J$  = 8.6 Hz), 6.32 (t, 1H,  $J$  = 5.8 Hz), 3.70 (dd, 1H,  $J$  = 11.2, 3.7 Hz), 3.31–3.21 (m, 2H), 2.04–1.96 (m, 1H), 1.90–1.79 (m, 1H), 1.54–1.46 (m, 2H), 1.40–1.22 (m, 10H), 0.94 (t, 3H,  $J$  = 7.3 Hz), 0.86 (t, 3H,  $J$  = 6.8 Hz);  $^{13}\text{C}$  NMR (100 MHz,  $\text{CDCl}_3$ )  $\delta$  164.0, 141.4, 135.2, 130.7, 129.6, 71.9, 40.0, 31.53, 31.48, 28.9, 27.0, 26.9, 22.6, 20.2, 14.2, 13.9; IR (neat) ( $\text{cm}^{-1}$ ) 3270m, 2925m, 1668s, 1638s, 1469m, 1361w, 830m, 754s; HRMS (ESI):  $m/z$  calcd for  $\text{C}_{18}\text{H}_{29}\text{ClNO}_3\text{S}$  [ $\text{M} + \text{H}$ ] $^+$  374.1551, found 374.1556.

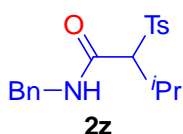

**Condition A:** To a 10 mL Schlenk flask was added ynamide **1z** (114.6 mg, 0.35 mmol), 4CzIPN (2.8 mg, 0.0035 mmol), and *m*-xylene (2.0 mL, ynamide *concn* = 0.175 *M*) under a nitrogen atmosphere. The reaction mixture was stirred and irradiated for 8 h at a distance of ~3.5 cm (light intensity: 20 mW/cm<sup>2</sup> at 3.5 cm distance) with 30 W blue LEDs (450 nm) at 30 °C. Water (15.8  $\mu\text{L}$ , 0.88 mmol) was then added, and the mixture was stirred for an additional 2 h. After the reaction was determined to be complete by TLC analysis, the reaction mixture was purified by flash silica gel column chromatography [gradient eluent: 10:1~2:1 petroleum ether /EtOAc] to afford  $\alpha$ -sulfonyl amide **2z** (60.5 mg, 0.18 mmol) in 50% yield.

**Condition B:** To an oven-dried tube was added ynamide **1z** (114.6 mg, 0.35 mmol), and *m*-xylene (2.0 mL, ynamide *concn* = 0.175 *M*) under a nitrogen atmosphere. The vessel was sealed and heated to 140 °C with stirring for 6 h. Water (15.8  $\mu\text{L}$ , 0.88 mmol) was then added, and the mixture was stirred at 140 °C for an additional 2 h. After the reaction was determined to be complete by TLC analysis, the reaction mixture was purified by flash silica gel column chromatography [gradient eluent: 10:1~2:1 petroleum ether /EtOAc] to afford  $\alpha$ -sulfonyl amide **2z** (62.9 mg, 0.18 mmol) in 52% yield.

**2z:**  $R_f$  = 0.42 [2:1 petroleum ether/EtOAc]; white solid; mp = 152–153 °C;  $^1\text{H}$  NMR (400 MHz,  $\text{CDCl}_3$ )  $\delta$  7.64 (d, 2H,  $J$  = 8.4 Hz), 7.36–7.29 (m, 3H), 7.26–7.20 (m, 4H), 6.94 (t, 1H,  $J$  = 5.8 Hz), 4.42–4.29 (m, 2H), 3.66 (d, 1H,  $J$  = 7.2 Hz), 2.62–2.51 (m, 1H), 2.42 (s, 3H), 1.23 (d, 3H,  $J$  = 6.7 Hz), 1.10 (d, 3H,  $J$  = 6.7 Hz);  $^{13}\text{C}$  NMR (100 MHz,  $\text{CDCl}_3$ )  $\delta$  164.1, 145.4, 137.5, 135.3, 130.0, 128.9,

128.7, 128.3, 127.9, 77.2, 44.1, 28.1, 22.1, 21.9, 20.3; IR (neat) ( $\text{cm}^{-1}$ ) 3349m, 2954w, 1663s, 1521s, 1455m, 1286s, 1138s, 866m; HRMS (ESI):  $m/z$  calcd for  $\text{C}_{19}\text{H}_{24}\text{NO}_3\text{S}$   $[\text{M} + \text{H}]^+$  346.1471, found 346.1471.

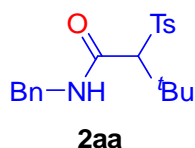

**Condition A:** To a 10 mL Schlenk flask was added ynamide **1aa** (119.5 mg, 0.35 mmol), 4CzIPN (2.8 mg, 0.0035 mmol), and *m*-xylene (2.0 mL, ynamide *concn* = 0.175 M) under a nitrogen atmosphere. The reaction mixture was stirred and irradiated for 6 h at a distance of ~3.5 cm (light intensity: 20 mW/cm<sup>2</sup> at 3.5 cm distance) with 30 W blue LEDs (450 nm) at 30 °C. Water (15.8  $\mu\text{L}$ , 0.88 mmol) was then added, and the mixture was stirred for an additional 2 h. After the reaction was determined to be complete by TLC analysis, the reaction mixture was purified by flash silica gel column chromatography [gradient eluent: 10:1~2:1 petroleum ether /EtOAc] to afford  $\alpha$ -sulfonyl amide **2aa** (61.7 mg, 0.17 mmol) in 49% yield.

**Condition B:** To an oven-dried tube was added ynamide **1aa** (119.5 mg, 0.35 mmol), and *m*-xylene (2.0 mL, ynamide *concn* = 0.175 M) under a nitrogen atmosphere. The vessel was sealed and heated to 140 °C with stirring for 8.5 h. Water (15.8  $\mu\text{L}$ , 0.88 mmol) was then added, and the mixture was stirred at 140 °C for an additional 2 h. After the reaction was determined to be complete by TLC analysis, the reaction mixture was purified by flash silica gel column chromatography [gradient eluent: 10:1~2:1 petroleum ether /EtOAc] to afford  $\alpha$ -sulfonyl amide **2aa** (56.6 mg, 0.16 mmol) in 45% yield.

**2aa:**  $R_f$  = 0.47 [2:1 petroleum ether/EtOAc]; white solid; mp = 150–151 °C; <sup>1</sup>H NMR (400 MHz,  $\text{CDCl}_3$ )  $\delta$  7.58 (d, 2H,  $J$  = 8.3 Hz), 7.35–7.28 (m, 3H), 7.19 (d, 4H,  $J$  = 9.1 Hz), 7.05 (t, 1H,  $J$  = 5.8 Hz), 4.30 (d, 2H,  $J$  = 4.5 Hz), 3.76 (s, 1H), 2.40 (s, 3H), 1.30 (s, 9H); <sup>13</sup>C NMR (100 MHz,  $\text{CDCl}_3$ )  $\delta$  164.2, 145.0, 137.4, 136.8, 129.9, 128.8, 128.39, 128.36, 127.8, 80.0, 44.1, 36.2, 29.6, 21.8; IR (neat) ( $\text{cm}^{-1}$ ) 3375m, 2987w, 1667s, 1524s, 1456m, 1328s, 1139s, 827m; HRMS (ESI):  $m/z$  calcd for  $\text{C}_{20}\text{H}_{26}\text{NO}_3\text{S}$   $[\text{M} + \text{H}]^+$  360.1628, found 360.1631.

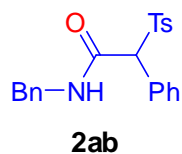

**Condition A:** To a 10 mL Schlenk flask was added ynamide **1ab** (126.5 mg, 0.35 mmol), 4CzIPN (2.8 mg, 0.0035 mmol), and *m*-xylene (2.0 mL, ynamide *concn* = 0.175 M) under a nitrogen atmosphere. The reaction mixture was stirred and irradiated for 20 h at a distance of ~3.5 cm (light

intensity: 20 mW/cm<sup>2</sup> at 3.5 cm distance) with 30 W blue LEDs (450 nm) at 30 °C. Water (15.8 µL, 0.88 mmol) was then added, and the mixture was stirred for an additional 1 h. After the reaction was determined to be complete by TLC analysis, the reaction mixture was purified by flash silica gel column chromatography [gradient eluent: 10:1~4:1 petroleum ether /EtOAc] to afford  $\alpha$ -sulfonyl amide **2ab** (54.7 mg, 0.14 mmol) in 41% yield.

**Condition B:** To an oven-dried tube was added ynamide **1ab** (126.5 mg, 0.35 mmol), and *m*-xylene (2.0 mL, ynamide *concn* = 0.175 M) under a nitrogen atmosphere. The vessel was sealed and heated to 140 °C with stirring for 7 h. Water (15.8 µL, 0.88 mmol) was then added, and the mixture was stirred at 140 °C for an additional 1 h. After the reaction was determined to be complete by TLC analysis, the reaction mixture was purified by flash silica gel column chromatography [gradient eluent: 10:1~4:1 petroleum ether /EtOAc] to afford  $\alpha$ -sulfonyl amide **2ab** (48.7 mg, 0.13 mmol) in 37% yield.

**2ab:**  $R_f$  = 0.22 [4:1 petroleum ether/EtOAc]; white solid; mp = 218–219 °C; <sup>1</sup>H NMR (400 MHz, CDCl<sub>3</sub>)  $\delta$  7.43 (d, 2H,  $J$  = 8.1 Hz), 7.38–7.27 (m, 10H), 7.23 (t, 1H,  $J$  = 5.7 Hz), 7.17 (d, 2H,  $J$  = 8.0 Hz), 4.93 (s, 1H), 4.54 (d, 2H,  $J$  = 5.7 Hz), 2.40 (s, 3H); <sup>13</sup>C NMR (100 MHz, CDCl<sub>3</sub>)  $\delta$  163.2, 145.6, 137.5, 133.7, 130.5, 129.63, 129.61, 129.5, 128.97, 128.96, 128.8, 128.1, 127.9, 76.2, 44.4, 21.9; IR (neat) (cm<sup>-1</sup>) 3356m, 2850w, 1669s, 1514m, 1285m, 1142s, 805s, 744s; HRMS (ESI):  $m/z$  calcd for C<sub>22</sub>H<sub>22</sub>NO<sub>3</sub>S [M + H]<sup>+</sup> 380.1315, found 380.1323.

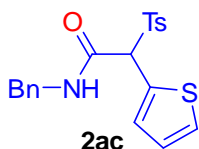

**Condition A:** To a 10 mL Schlenk flask was added ynamide **1ac** (128.6 mg, 0.35 mmol), 4CzIPN (2.8 mg, 0.0035 mmol), and *m*-xylene (2.0 mL, ynamide *concn* = 0.175 M) under a nitrogen atmosphere. The reaction mixture was stirred and irradiated for 9.5 h at a distance of ~3.5 cm (light intensity: 20 mW/cm<sup>2</sup> at 3.5 cm distance) with 30 W blue LEDs (450 nm) at 30 °C. Water (15.8 µL, 0.88 mmol) was then added, and the mixture was stirred for an additional 1 h. After the reaction was determined to be complete by TLC analysis, the reaction mixture was purified by flash silica gel column chromatography [gradient eluent: 10:1~4:1 petroleum ether /EtOAc] to afford  $\alpha$ -sulfonyl amide **2ac** (24.3 mg, 0.06 mmol) in 18% yield.

**Condition B:** To an oven-dried tube was added ynamide **1ac** (128.6 mg, 0.35 mmol), and *m*-xylene (2.0 mL, ynamide *concn* = 0.175 M) under a nitrogen atmosphere. The vessel was sealed and heated to 140 °C with stirring for 12 h. Water (15.8 µL, 0.88 mmol) was then added, and the mixture was stirred at 140 °C for an additional 1 h. After the reaction was determined to be complete

by TLC analysis, the reaction mixture was purified by flash silica gel column chromatography [gradient eluent: 10:1~4:1 petroleum ether /EtOAc] to afford  $\alpha$ -sulfonyl amide **2ac** (11.0 mg, 0.03 mmol) in 8% yield.

**2ac**:  $R_f$  = 0.20 [4:1 petroleum ether/EtOAc]; white solid; mp = 214–215 °C;  $^1\text{H}$  NMR (400 MHz, DMSO)  $\delta$  8.87 (t, 1H,  $J$  = 5.8 Hz), 7.56 (d, 1H,  $J$  = 6.4 Hz), 7.47 (d, 2H,  $J$  = 8.4 Hz), 7.42–7.19 (m, 6H), 7.15 (d, 2H,  $J$  = 6.5 Hz), 7.03–6.96 (m, 2H), 4.36 (dd, 1H,  $J$  = 15.1, 3.9 Hz), 4.20 (dd, 1H,  $J$  = 15.2, 3.3 Hz), 2.40 (s, 3H);  $^{13}\text{C}$  NMR (100 MHz, DMSO)  $\delta$  163.5, 145.4, 138.5, 134.0, 130.6, 129.8, 129.7, 129.5, 128.8, 127.79, 127.78, 127.5, 126.8, 70.6, 43.1, 21.6; IR (neat) ( $\text{cm}^{-1}$ ) 3350m, 3180m, 2916s, 2848m, 1644m, 1139m, 813m, 696m; HRMS (ESI):  $m/z$  calcd for  $\text{C}_{20}\text{H}_{20}\text{NO}_3\text{S}_2$  [ $\text{M} + \text{H}$ ] $^+$  386.0879, found 386.0883.

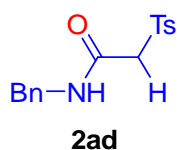

**Condition A**: To a 10 mL Schlenk flask was added ynamide **1ad** (99.9 mg, 0.35 mmol), 4CzIPN (2.8 mg, 0.0035 mmol), and *m*-xylene (2.0 mL, ynamide *concn* = 0.175 M) under a nitrogen atmosphere. The reaction mixture was stirred and irradiated for 4 h at a distance of ~3.5 cm (light intensity: 20 mW/cm<sup>2</sup> at 3.5 cm distance) with 30 W blue LEDs (450 nm) at 30 °C. Water (15.8  $\mu\text{L}$ , 0.88 mmol) was then added, and the mixture was stirred for an additional 2 h. After the reaction was determined to be complete by TLC analysis, the reaction mixture was purified by flash silica gel column chromatography [gradient eluent: 10:1~2:1 petroleum ether /EtOAc] to afford  $\alpha$ -sulfonyl amide **2ad** (95.2 mg, 0.31 mmol) in 90% yield.

**Condition B**: To an oven-dried tube was added ynamide **1ad** (99.9 mg, 0.35 mmol), and *m*-xylene (2.0 mL, ynamide *concn* = 0.175 M) under a nitrogen atmosphere. The vessel was sealed and heated to 140 °C with stirring for 1 h. Water (15.8  $\mu\text{L}$ , 0.88 mmol) was then added, and the mixture was stirred at 140 °C for an additional 1 h. After the reaction was determined to be complete by TLC analysis, the reaction mixture was purified by flash silica gel column chromatography [gradient eluent: 10:1~2:1 petroleum ether /EtOAc] to afford  $\alpha$ -sulfonyl amide **2ad** (56.0 mg, 0.18 mmol) in 53% yield.

**2ad**:  $R_f$  = 0.17 [2:1 petroleum ether/EtOAc]; white solid; mp = 143–144 °C;  $^1\text{H}$  NMR (400 MHz,  $\text{CDCl}_3$ )  $\delta$  7.67 (d, 2H,  $J$  = 8.3 Hz), 7.37–7.26 (m, 7H), 7.09 (t, 1H,  $J$  = 5.8 Hz), 4.43 (d, 2H,  $J$  = 5.9 Hz), 4.01 (s, 2H), 2.44 (s, 3H);  $^{13}\text{C}$  NMR (100 MHz,  $\text{CDCl}_3$ )  $\delta$  160.7, 145.8, 137.4, 135.1, 130.2, 128.9, 128.3, 128.2, 127.9, 62.1, 44.2, 21.9; IR (neat) ( $\text{cm}^{-1}$ ) 3353s, 2923w, 1594m, 1492w, 1358w, 1287s, 900m, 809s; HRMS (ESI):  $m/z$  calcd for  $\text{C}_{16}\text{H}_{18}\text{NO}_3\text{S}$  [ $\text{M} + \text{H}$ ] $^+$  304.1002, found 304.1006.

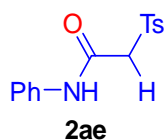

**Condition A:** To a 10 mL Schlenk flask was added ynamide **1ae** (95.0 mg, 0.35 mmol), 4CzIPN (2.8 mg, 0.0035 mmol), and *m*-xylene (2.0 mL, ynamide *concn* = 0.175 M) under a nitrogen atmosphere. The reaction mixture was stirred and irradiated for 2 h at a distance of ~3.5 cm (light intensity: 20 mW/cm<sup>2</sup> at 3.5 cm distance) with 30 W blue LEDs (450 nm) at 30 °C. Water (15.8 μL, 0.88 mmol) was then added, and the mixture was stirred for an additional 4 h. After the reaction was determined to be complete by TLC analysis, the reaction mixture was purified by flash silica gel column chromatography [gradient eluent: 10:1~2:1 petroleum ether /EtOAc] to afford  $\alpha$ -sulfonyl amide **2ae** (92.7 mg, 0.32 mmol) in 92% yield.

**Condition B:** To an oven-dried tube was added ynamide **1ae** (95.0 mg, 0.35 mmol), and *m*-xylene (2.0 mL, ynamide *concn* = 0.175 M) under a nitrogen atmosphere. The vessel was sealed and heated to 140 °C with stirring for 0.5 h. Water (15.8 μL, 0.88 mmol) was then added, and the mixture was stirred at 140 °C for an additional 4.5 h. After the reaction was determined to be complete by TLC analysis, the reaction mixture was purified by flash silica gel column chromatography [gradient eluent: 10:1~2:1 petroleum ether /EtOAc] to afford  $\alpha$ -sulfonyl amide **2ae** (12.3 mg, 0.04 mmol) in 12% yield.

**2ae:**  $R_f$  = 0.29 [2:1 petroleum ether/EtOAc]; white solid; mp = 159–160 °C; <sup>1</sup>H NMR (400 MHz, CDCl<sub>3</sub>)  $\delta$  8.56 (s, 1H), 7.80 (d, 2H,  $J$  = 8.2 Hz), 7.50 (d, 2H,  $J$  = 7.4 Hz), 7.40–7.30 (m, 4H), 7.20–7.11 (m, 1H), 4.17 (s, 2H), 2.44 (s, 3H); <sup>13</sup>C NMR (100 MHz, CDCl<sub>3</sub>)  $\delta$  158.8, 146.1, 137.1, 135.0, 130.4, 129.3, 128.3, 125.4, 120.3, 63.2, 21.9; IR (neat) (cm<sup>-1</sup>) 3327s, 1661s, 1541s, 1404m, 1235w, 1075s, 907m, 766s; HRMS (ESI):  $m/z$  calcd for C<sub>15</sub>H<sub>16</sub>NO<sub>3</sub>S [M + H]<sup>+</sup> 290.0845, found 290.0849.

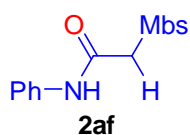

**Condition A:** To a 10 mL Schlenk flask was added ynamide **1af** (100.6 mg, 0.35 mmol), 4CzIPN (2.8 mg, 0.0035 mmol), and *m*-xylene (2.0 mL, ynamide *concn* = 0.175 M) under a nitrogen atmosphere. The reaction mixture was stirred and irradiated for 2 h at a distance of ~3.5 cm (light intensity: 20 mW/cm<sup>2</sup> at 3.5 cm distance) with 30 W blue LEDs (450 nm) at 30 °C. Water (15.8 μL, 0.88 mmol) was then added, and the mixture was stirred for an additional 1 h. After the reaction was determined to be complete by TLC analysis, the reaction mixture was purified by flash silica gel



column chromatography [gradient eluent: 10:1~2:1 petroleum ether /EtOAc] to afford  $\alpha$ -sulfonyl amide **2af** (78.9 mg, 0.26 mmol) in 74% yield.

**2af**:  $R_f$  = 0.17 [2:1 petroleum ether/EtOAc]; white solid; mp = 138–139 °C;  $^1\text{H}$  NMR (400 MHz,  $\text{CDCl}_3$ )  $\delta$  8.56 (s, 1H), 7.84 (d, 2H,  $J$  = 8.9 Hz), 7.50 (d, 2H,  $J$  = 7.4 Hz), 7.34 (t, 2H,  $J$  = 7.9 Hz), 7.16 (t, 1H,  $J$  = 7.4 Hz), 7.01 (d, 2H,  $J$  = 8.9 Hz), 4.15 (s, 2H), 3.87 (s, 3H);  $^{13}\text{C}$  NMR (100 MHz,  $\text{CDCl}_3$ )  $\delta$  164.6, 158.9, 137.1, 130.6, 129.31, 129.32, 125.4, 120.3, 115.0, 63.4, 55.9; IR (neat) ( $\text{cm}^{-1}$ ) 3320m, 2344w, 1661s, 1441m, 1311m, 1260s, 1147s, 911m; HRMS (ESI):  $m/z$  calcd for  $\text{C}_{15}\text{H}_{16}\text{NO}_4\text{S}$  [ $\text{M} + \text{H}$ ] $^+$  306.0795, found 306.0799.

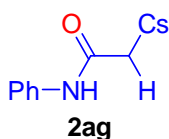

**Condition A:** To a 10 mL Schlenk flask was added ynamide **1ag** (102.1 mg, 0.35 mmol), 4CzIPN (2.8 mg, 0.0035 mmol), and *m*-xylene (2.0 mL, ynamide *concn* = 0.175 *M*) under a nitrogen atmosphere. The reaction mixture was stirred and irradiated for 0.5 h at a distance of ~3.5 cm (light intensity: 20 mW/cm<sup>2</sup> at 3.5 cm distance) with 30 W blue LEDs (450 nm) at 30 °C. Water (15.8  $\mu\text{L}$ , 0.88 mmol) was then added, and the mixture was stirred for an additional 0.5 h. After the reaction was determined to be complete by TLC analysis, the reaction mixture was purified by flash silica gel column chromatography [gradient eluent: 10:1~2:1 petroleum ether /EtOAc] to afford  $\alpha$ -sulfonyl amide **2ag** (101.3 mg, 0.33 mmol) in 93% yield.

**Condition B:** To an oven-dried tube was added ynamide **1ag** (102.1 mg, 0.35 mmol), and *m*-xylene (2.0 mL, ynamide *concn* = 0.175 *M*) under a nitrogen atmosphere. The vessel was sealed and heated to 140 °C with stirring for 0.5 h. Water (15.8  $\mu\text{L}$ , 0.88 mmol) was then added, and the mixture was stirred at 140 °C for an additional 0.5 h. After the reaction was determined to be complete by TLC analysis, the reaction mixture was purified by flash silica gel column chromatography [gradient eluent: 10:1~2:1 petroleum ether /EtOAc] to afford  $\alpha$ -sulfonyl amide **2ag** (23.5 mg, 0.08 mmol) in 22% yield.

**2ag**:  $R_f$  = 0.37 [2:1 petroleum ether/EtOAc]; white solid; mp = 174–175 °C;  $^1\text{H}$  NMR (400 MHz,  $\text{CDCl}_3$ )  $\delta$  8.41 (s, 1H), 7.86 (d, 2H,  $J$  = 8.7 Hz), 7.58-7.45 (m, 4H), 7.36 (t, 2H,  $J$  = 7.9 Hz), 7.18 (t, 1H,  $J$  = 7.4 Hz), 4.17 (s, 2H);  $^{13}\text{C}$  NMR (100 MHz,  $\text{CDCl}_3$ )  $\delta$  158.3, 141.9, 136.9, 136.3, 130.2, 129.8, 129.4, 125.6, 120.3, 63.2; IR (neat) ( $\text{cm}^{-1}$ ) 3372m, 2920w, 1663s, 1532s, 1393w, 1084s, 831m, 688s; HRMS (ESI):  $m/z$  calcd for  $\text{C}_{14}\text{H}_{13}\text{ClNO}_3\text{S}$  [ $\text{M} + \text{H}$ ] $^+$  310.0299, found 310.0304.



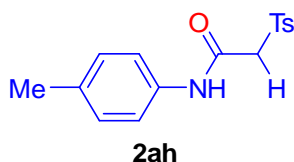

**Condition A:** To a 10 mL Schlenk flask was added ynamide **1ah** (99.9 mg, 0.35 mmol), 4CzIPN (2.8 mg, 0.0035 mmol), and *m*-xylene (2.0 mL, ynamide *concn* = 0.175 M) under a nitrogen atmosphere. The reaction mixture was stirred and irradiated for 1.5 h at a distance of ~3.5 cm (light intensity: 20 mW/cm<sup>2</sup> at 3.5 cm distance) with 30 W blue LEDs (450 nm) at 30 °C. Water (15.8 μL, 0.88 mmol) was then added, and the mixture was stirred for an additional 3 h. After the reaction was determined to be complete by TLC analysis, the reaction mixture was purified by flash silica gel column chromatography [gradient eluent: 10:1~2:1 petroleum ether /EtOAc] to afford  $\alpha$ -sulfonyl amide **2ah** (81.3 mg, 0.27 mmol) in 77% yield.

**2ah:**  $R_f$  = 0.39 [2:1 petroleum ether/EtOAc]; white solid; mp = 145–146 °C; <sup>1</sup>H NMR (400 MHz, CDCl<sub>3</sub>)  $\delta$  8.59 (s, 1H), 7.80 (d, 2H,  $J$  = 8.4 Hz), 7.35 (t, 4H,  $J$  = 8.9 Hz), 7.10 (d, 2H,  $J$  = 8.1 Hz), 4.18 (s, 2H), 2.42 (s, 3H), 2.31 (s, 3H); <sup>13</sup>C NMR (100 MHz, CDCl<sub>3</sub>)  $\delta$  158.8, 146.0, 135.1, 135.0, 134.6, 130.3, 129.7, 128.3, 120.4, 63.2, 21.9, 21.1; IR (neat) (cm<sup>-1</sup>) 3338m, 2991m, 2922m, 1662s, 1508s, 1236w, 814s, 723s; HRMS (ESI):  $m/z$  calcd for C<sub>16</sub>H<sub>18</sub>NO<sub>3</sub>S [M + H]<sup>+</sup> 304.1002, found 304.1006.

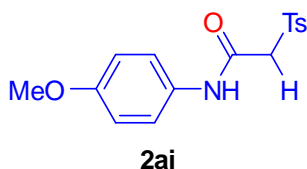

**Condition A:** To a 10 mL Schlenk flask was added ynamide **1ai** (105.5 mg, 0.35 mmol), 4CzIPN (2.8 mg, 0.0035 mmol), and *m*-xylene (2.0 mL, ynamide *concn* = 0.175 M) under a nitrogen atmosphere. The reaction mixture was stirred and irradiated for 3.5 h at a distance of ~3.5 cm (light intensity: 20 mW/cm<sup>2</sup> at 3.5 cm distance) with 30 W blue LEDs (450 nm) at 30 °C. Water (15.8 μL, 0.88 mmol) was then added, and the mixture was stirred for an additional 2 h. After the reaction was determined to be complete by TLC analysis, the reaction mixture was purified by flash silica gel column chromatography [gradient eluent: 10:1~2:1 petroleum ether /EtOAc] to afford  $\alpha$ -sulfonyl amide **2ai** (83.1 mg, 0.26 mmol) in 74% yield.

**Condition B:** To an oven-dried tube was added ynamide **1ai** (105.5 mg, 0.35 mmol), and *m*-xylene (2.0 mL, ynamide *concn* = 0.175 M) under a nitrogen atmosphere. The vessel was sealed and heated to 140 °C with stirring for 0.5 h. Water (15.8 μL, 0.88 mmol) was then added, and the mixture was stirred at 140 °C for an additional 1.5 h. After the reaction was determined to be complete by TLC

analysis, the reaction mixture was purified by flash silica gel column chromatography [gradient eluent: 10:1~2:1 petroleum ether /EtOAc] to afford  $\alpha$ -sulfonyl amide **2ai** (13.6 mg, 0.04 mmol) in 12% yield.

**2ai:**  $R_f$  = 0.19 [2:1 petroleum ether/EtOAc]; white solid; mp = 144–145 °C;  $^1\text{H}$  NMR (400 MHz,  $\text{CDCl}_3$ )  $\delta$  8.48 (s, 1H), 7.80 (d, 2H,  $J$  = 8.3 Hz), 7.37 (dd, 4H,  $J$  = 12.4, 8.5 Hz), 6.85 (d, 2H,  $J$  = 9.0 Hz), 4.15 (s, 2H), 3.79 (s, 3H), 2.44 (s, 3H);  $^{13}\text{C}$  NMR (100 MHz,  $\text{CDCl}_3$ )  $\delta$  158.7, 157.1, 146.0, 135.1, 130.4, 130.2, 128.3, 122.1, 114.3, 63.0, 55.6, 21.9; IR (neat) ( $\text{cm}^{-1}$ ) 3750m, 1658m, 1508s, 1412m, 1275w, 1144s, 823s, 721m; HRMS (ESI):  $m/z$  calcd for  $\text{C}_{16}\text{H}_{18}\text{NO}_4\text{S}$  [ $\text{M} + \text{H}$ ] $^+$  320.0951, found 320.0954.

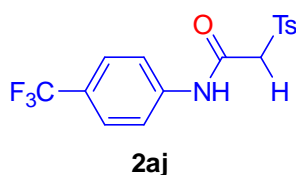

**Condition A:** To a 10 mL Schlenk flask was added ynamide **1aj** (118.8 mg, 0.35 mmol), 4CzIPN (2.8 mg, 0.0035 mmol), and *m*-xylene (2.0 mL, ynamide *concn* = 0.175 *M*) under a nitrogen atmosphere. The reaction mixture was stirred and irradiated for 12 h at a distance of ~3.5 cm (light intensity: 20 mW/cm<sup>2</sup> at 3.5 cm distance) with 30 W blue LEDs (450 nm) at 30 °C. Water (15.8  $\mu\text{L}$ , 0.88 mmol) was then added, and the mixture was stirred for an additional 1 h. After the reaction was determined to be complete by TLC analysis, the reaction mixture was purified by flash silica gel column chromatography [gradient eluent: 10:1~2:1 petroleum ether /EtOAc] to afford  $\alpha$ -sulfonyl amide **2aj** (70.2 mg, 0.20 mmol) in 56% yield.

**Condition B:** To an oven-dried tube was added ynamide **1aj** (118.8 mg, 0.35 mmol), and *m*-xylene (2.0 mL, ynamide *concn* = 0.175 *M*) under a nitrogen atmosphere. The vessel was sealed and heated to 140 °C with stirring for 24 h. Water (15.8  $\mu\text{L}$ , 0.88 mmol) was then added, and the mixture was stirred at 140 °C for an additional 1 h. After the reaction was determined to be complete by TLC analysis, the reaction mixture was purified by flash silica gel column chromatography [gradient eluent: 10:1~2:1 petroleum ether /EtOAc] to afford  $\alpha$ -sulfonyl amide **2aj** (10.2 mg, 0.03 mmol) in 8% yield.

**2aj:**  $R_f$  = 0.28 [2:1 petroleum ether/EtOAc]; white solid; mp = 182–183 °C;  $^1\text{H}$  NMR (400 MHz,  $\text{CDCl}_3$ )  $\delta$  8.74 (s, 1H), 7.79 (d, 2H,  $J$  = 8.4 Hz), 7.70–7.53 (m, 4H), 7.38 (d, 2H,  $J$  = 8.1 Hz), 4.18 (s, 2H), 2.46 (s, 3H);  $^{13}\text{C}$  NMR (100 MHz,  $\text{CDCl}_3$ )  $\delta$  159.1, 146.4, 140.1, 134.8, 130.6, 128.2, 127.1 (q,  $J_{\text{C-F}}$  = 33.1 Hz), 126.6 (q,  $J_{\text{C-F}}$  = 3.8 Hz), 124.1 (q,  $J_{\text{C-F}}$  = 270.3 Hz), 119.9, 63.1, 22.0;  $^{19}\text{F}$  NMR (376 MHz,  $\text{CDCl}_3$ )  $\delta$  -62.2; IR (neat) ( $\text{cm}^{-1}$ ) 3375m, 2936w, 1683s, 1528s, 1182m, 1067s, 839m, 739m;

HRMS (ESI):  $m/z$  calcd for  $C_{16}H_{15}F_3NO_3S$   $[M + H]^+$  358.0719, found 358.0722.

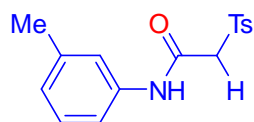

**2ak**

**Condition A:** To a 10 mL Schlenk flask was added ynamide **1ak** (99.9 mg, 0.35 mmol), 4CzIPN (2.8 mg, 0.0035 mmol), and *m*-xylene (2.0 mL, ynamide *concn* = 0.175 M) under a nitrogen atmosphere. The reaction mixture was stirred and irradiated for 3 h at a distance of ~3.5 cm (light intensity: 20 mW/cm<sup>2</sup> at 3.5 cm distance) with 30 W blue LEDs (450 nm) at 30 °C. Water (15.8  $\mu$ L, 0.88 mmol) was then added, and the mixture was stirred for an additional 2.5 h. After the reaction was determined to be complete by TLC analysis, the reaction mixture was purified by flash silica gel column chromatography [gradient eluent: 10:1~2:1 petroleum ether /EtOAc] to afford  $\alpha$ -sulfonyl amide **2ak** (75.7 mg, 0.25 mmol) in 71% yield.

**Condition B:** To an oven-dried tube was added ynamide **1ak** (99.9 mg, 0.35 mmol), and *m*-xylene (2.0 mL, ynamide *concn* = 0.175 M) under a nitrogen atmosphere. The vessel was sealed and heated to 140 °C with stirring for 0.5 h. Water (15.8  $\mu$ L, 0.88 mmol) was then added, and the mixture was stirred at 140 °C for an additional 0.5 h. After the reaction was determined to be complete by TLC analysis, the reaction mixture was purified by flash silica gel column chromatography [gradient eluent: 10:1~2:1 petroleum ether /EtOAc] to afford  $\alpha$ -sulfonyl amide **2ak** (9.8 mg, 0.03 mmol) in 9% yield.

**2ak:**  $R_f$  = 0.30 [2:1 petroleum ether/EtOAc]; white solid; mp = 112–113 °C; <sup>1</sup>H NMR (400 MHz, CDCl<sub>3</sub>)  $\delta$  8.54 (s, 1H), 7.80 (d, 2H,  $J$  = 8.3 Hz), 7.37-7.27 (m, 4H), 7.20 (t, 1H,  $J$  = 7.8 Hz), 6.97 (d, 1H,  $J$  = 7.5 Hz), 4.16 (s, 2H), 2.43 (s, 3H), 2.32 (s, 3H); <sup>13</sup>C NMR (100 MHz, CDCl<sub>3</sub>)  $\delta$  158.7, 146.1, 139.2, 137.1, 135.0, 130.4, 129.1, 128.3, 126.1, 120.9, 117.4, 63.2, 21.9, 21.6; IR (neat) (cm<sup>-1</sup>) 3263m, 2962w, 1662s, 1528s, 1431w, 1288w, 1145s, 801m; HRMS (ESI):  $m/z$  calcd for  $C_{16}H_{18}NO_3S$   $[M + H]^+$  304.1002, found 304.1006.

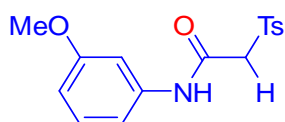

**2al**

**Condition A:** To a 10 mL Schlenk flask was added ynamide **1al** (105.5 mg, 0.35 mmol), 4CzIPN (2.8 mg, 0.0035 mmol), and *m*-xylene (2.0 mL, ynamide *concn* = 0.175 M) under a nitrogen atmosphere. The reaction mixture was stirred and irradiated for 1 h at a distance of ~3.5 cm (light

intensity: 20 mW/cm<sup>2</sup> at 3.5 cm distance) with 30 W blue LEDs (450 nm) at 30 °C. Water (15.8 μL, 0.88 mmol) was then added, and the mixture was stirred for an additional 1.5 h. After the reaction was determined to be complete by TLC analysis, the reaction mixture was purified by flash silica gel column chromatography [gradient eluent: 10:1~2:1 petroleum ether /EtOAc] to afford α-sulfonyl amide **2al** (94.6 mg, 0.30 mmol) in 85% yield.

**2al**:  $R_f$  = 0.22 [2:1 petroleum ether/EtOAc]; white solid; mp = 109–110 °C; <sup>1</sup>H NMR (400 MHz, CDCl<sub>3</sub>) δ 8.66 (s, 1H), 7.80 (d, 2H,  $J$  = 8.3 Hz), 7.34 (d, 2H,  $J$  = 8.0 Hz), 7.23–7.16 (m, 2H), 7.01 (dd, 1H,  $J$  = 8.0, 2.0 Hz), 6.69 (d, 1H,  $J$  = 8.3 Hz), 4.19 (s, 2H), 3.75 (s, 3H), 2.43 (s, 3H); <sup>13</sup>C NMR (100 MHz, CDCl<sub>3</sub>) δ 160.2, 158.9, 146.0, 138.4, 135.0, 130.3, 129.9, 128.3, 112.4, 111.0, 105.9, 63.3, 55.4, 21.9; IR (neat) (cm<sup>-1</sup>) 3282m, 2916w, 1666s, 1428m, 1217s, 1146s, 848s, 703m; HRMS (ESI):  $m/z$  calcd for C<sub>16</sub>H<sub>18</sub>NO<sub>4</sub>S [M + H]<sup>+</sup> 320.0951, found 320.0955.

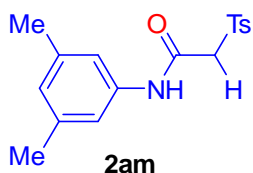

**Condition A**: To a 10 mL Schlenk flask was added ynamide **1am** (104.8 mg, 0.35 mmol), 4CzIPN (2.8 mg, 0.0035 mmol), and *m*-xylene (2.0 mL, ynamide *concn* = 0.175 M) under a nitrogen atmosphere. The reaction mixture was stirred and irradiated for 2 h at a distance of ~3.5 cm (light intensity: 20 mW/cm<sup>2</sup> at 3.5 cm distance) with 30 W blue LEDs (450 nm) at 30 °C. Water (15.8 μL, 0.88 mmol) was then added, and the mixture was stirred for an additional 0.5 h. After the reaction was determined to be complete by TLC analysis, the reaction mixture was purified by flash silica gel column chromatography [gradient eluent: 10:1~2:1 petroleum ether /EtOAc] to afford α-sulfonyl amide **2am** (78.0 mg, 0.25 mmol) in 70% yield.

**Condition B**: To an oven-dried tube was added ynamide **1am** (104.8 mg, 0.35 mmol), and *m*-xylene (2.0 mL, ynamide *concn* = 0.175 M) under a nitrogen atmosphere. The vessel was sealed and heated to 140 °C with stirring for 1 h. Water (15.8 μL, 0.88 mmol) was then added, and the mixture was stirred at 140 °C for an additional 0.5 h. After the reaction was determined to be complete by TLC analysis, the reaction mixture was purified by flash silica gel column chromatography [gradient eluent: 10:1~2:1 petroleum ether /EtOAc] to afford α-sulfonyl amide **2am** (29.8 mg, 0.09 mmol) in 27% yield.

**2am**:  $R_f$  = 0.35 [2:1 petroleum ether/EtOAc]; white solid; mp = 139–140 °C; <sup>1</sup>H NMR (400 MHz, CDCl<sub>3</sub>) δ 8.51 (s, 1H), 7.80 (d, 2H,  $J$  = 8.3 Hz), 7.35 (d, 2H,  $J$  = 8.0 Hz), 7.12 (s, 2H), 6.79 (s, 1H), 4.15 (s, 2H), 2.43 (s, 3H), 2.28 (s, 6H); <sup>13</sup>C NMR (100 MHz, CDCl<sub>3</sub>) δ 158.7, 146.0, 138.9, 137.0,

135.1, 130.3, 128.3, 127.0, 118.0, 63.2, 21.9, 21.5; IR (neat) ( $\text{cm}^{-1}$ ) 3270m, 2919w, 1684s, 1534s, 1217m, 1147s, 804m, 705m; HRMS (ESI):  $m/z$  calcd for  $\text{C}_{17}\text{H}_{20}\text{NO}_3\text{S}$   $[\text{M} + \text{H}]^+$  318.1158 found 318.1164.

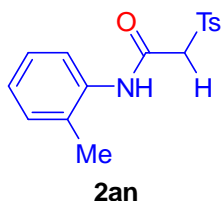

**Condition A:** To a 10 mL Schlenk flask was added ynamide **1an** (99.9 mg, 0.35 mmol), 4CzIPN (2.8 mg, 0.0035 mmol), and *m*-xylene (2.0 mL, ynamide *concn* = 0.175 M) under a nitrogen atmosphere. The reaction mixture was stirred and irradiated for 4.5 h at a distance of ~3.5 cm (light intensity: 20 mW/cm<sup>2</sup> at 3.5 cm distance) with 30 W blue LEDs (450 nm) at 30 °C. Water (15.8  $\mu\text{L}$ , 0.88 mmol) was then added, and the mixture was stirred for an additional 1 h. After the reaction was determined to be complete by TLC analysis, the reaction mixture was purified by flash silica gel column chromatography [gradient eluent: 10:1~2:1 petroleum ether /EtOAc] to afford  $\alpha$ -sulfonyl amide **2an** (72.0 mg, 0.24 mmol) in 68% yield.

**Condition B:** To an oven-dried tube was added ynamide **1an** (99.9 mg, 0.35 mmol), and *m*-xylene (2.0 mL, ynamide *concn* = 0.175 M) under a nitrogen atmosphere. The vessel was sealed and heated to 140 °C with stirring for 2.5 h. Water (15.8  $\mu\text{L}$ , 0.88 mmol) was then added, and the mixture was stirred at 140 °C for an additional 0.5 h. After the reaction was determined to be complete by TLC analysis, the reaction mixture was purified by flash silica gel column chromatography [gradient eluent: 10:1~2:1 petroleum ether /EtOAc] to afford  $\alpha$ -sulfonyl amide **2an** (30.1 mg, 0.10 mmol) in 28% yield.

**2an:**  $R_f$  = 0.35 [2:1 petroleum ether/EtOAc]; white solid; mp = 117–118 °C; <sup>1</sup>H NMR (400 MHz,  $\text{CDCl}_3$ )  $\delta$  8.47 (s, 1H), 7.81 (d, 2H,  $J$  = 8.3 Hz), 7.74 (d, 1H,  $J$  = 8.1 Hz), 7.36 (d, 2H,  $J$  = 8.1 Hz), 7.19 (dd, 2H,  $J$  = 11.6, 7.8 Hz), 7.10 (t, 1H,  $J$  = 7.5 Hz), 4.19 (s, 2H), 2.44 (s, 3H), 2.35 (s, 3H); <sup>13</sup>C NMR (100 MHz,  $\text{CDCl}_3$ )  $\delta$  158.9, 146.0, 135.2, 135.1, 130.8, 130.4, 129.5, 128.2, 126.9, 125.9, 122.8, 62.7, 21.9, 18.0; IR (neat) ( $\text{cm}^{-1}$ ) 3334w, 2983w, 1654s, 1523s, 1412m, 1146m, 918m, 809m; HRMS (ESI):  $m/z$  calcd for  $\text{C}_{16}\text{H}_{18}\text{NO}_3\text{S}$   $[\text{M} + \text{H}]^+$  304.1002, found 304.1006.

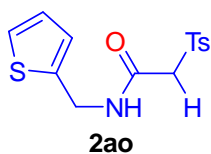

**Condition A:** To a 10 mL Schlenk flask was added ynamide **1ao** (102.0 mg, 0.35 mmol), 4CzIPN (2.8 mg, 0.0035 mmol), and *m*-xylene (2.0 mL, ynamide *concn* = 0.175 M) under a nitrogen

atmosphere. The reaction mixture was stirred and irradiated for 6 h at a distance of ~3.5 cm (light intensity: 20 mW/cm<sup>2</sup> at 3.5 cm distance) with 30 W blue LEDs (450 nm) at 30 °C. Water (15.8 µL, 0.88 mmol) was then added, and the mixture was stirred for an additional 1 h. After the reaction was determined to be complete by TLC analysis, the reaction mixture was purified by flash silica gel column chromatography [gradient eluent: 10:1~2:1 petroleum ether /EtOAc] to afford  $\alpha$ -sulfonyl amide **2ao** (74.8 mg, 0.24 mmol) in 69% yield.

**2ao**:  $R_f$  = 0.30 [2:1 petroleum ether/EtOAc]; yellow solid; mp = 129–130 °C; <sup>1</sup>H NMR (400 MHz, CDCl<sub>3</sub>)  $\delta$  7.68 (d, 2H,  $J$  = 8.4 Hz), 7.30 (d, 2H,  $J$  = 8.0 Hz), 7.26-7.23 (m, 1H), 7.20 (t, 1H,  $J$  = 5.8 Hz), 7.01-6.93 (m, 2H), 4.58 (d, 2H,  $J$  = 5.6 Hz), 4.00 (s, 2H), 2.43 (s, 3H); <sup>13</sup>C NMR (100 MHz, CDCl<sub>3</sub>)  $\delta$  160.6, 145.7, 139.8, 135.1, 130.2, 128.3, 127.1, 126.8, 125.6, 62.0, 38.6, 21.9; IR (neat) (cm<sup>-1</sup>) 3353m, 2919w, 2362m, 1664s, 1520s, 1316m, 1143s, 899m; HRMS (ESI):  $m/z$  calcd for C<sub>14</sub>H<sub>16</sub>NO<sub>3</sub>S<sub>2</sub> [M + H]<sup>+</sup> 310.0566, found 310.0567.

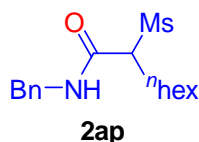

**Condition A:** To a 10 mL Schlenk flask was added ynamide **1ap** (102.7 mg, 0.35 mmol), 4CzIPN (2.8 mg, 0.0035 mmol), and *m*-xylene (2.0 mL, ynamide *concn* = 0.175 M) under a nitrogen atmosphere. The reaction mixture was stirred and irradiated for 7.5 h at a distance of ~3.5 cm (light intensity: 20 mW/cm<sup>2</sup> at 3.5 cm distance) with 30 W blue LEDs (450 nm) at 30 °C. Water (15.8 µL, 0.88 mmol) was then added, and the mixture was stirred for an additional 1.5 h. After the reaction was determined to be complete by TLC analysis, the reaction mixture was purified by flash silica gel column chromatography [gradient eluent: 10:1~4:1 petroleum ether /EtOAc] to afford  $\alpha$ -sulfonyl amide **2ap** (96.0 mg, 0.31 mmol) in 88% yield.

**Condition B:** To an oven-dried tube was added ynamide **1ap** (102.7 mg, 0.35 mmol), and *m*-xylene (2.0 mL, ynamide *concn* = 0.175 M) under a nitrogen atmosphere. The vessel was sealed and heated to 140 °C with stirring for 12 h. Water (15.8 µL, 0.88 mmol) was then added, and the mixture was stirred at 140 °C for an additional 1 h. After the reaction was determined to be complete by TLC analysis, the reaction mixture was purified by flash silica gel column chromatography [gradient eluent: 10:1~4:1 petroleum ether /EtOAc] to afford  $\alpha$ -sulfonyl amide **2ap** (36.0 mg, 0.12 mmol) in 33% yield.

**2ap**:  $R_f$  = 0.27 [4:1 petroleum ether/EtOAc]; white solid; <sup>1</sup>H NMR (400 MHz, CDCl<sub>3</sub>)  $\delta$  7.36-7.27 (m, 5H), 6.83 (t, 1H,  $J$  = 5.7 Hz), 4.48 (d, 2H,  $J$  = 5.8 Hz), 3.56 (dd, 1H,  $J$  = 9.7, 5.2 Hz), 2.90 (s, 3H), 2.08-1.99 (m, 2H), 1.39-1.24 (m, 8H), 0.88 (t, 3H,  $J$  = 6.7 Hz); <sup>13</sup>C NMR (100 MHz, CDCl<sub>3</sub>)  $\delta$  165.2,

137.5, 128.9, 127.83, 127.80, 70.8, 44.2, 37.9, 31.5, 28.9, 27.13, 27.08, 22.6, 14.2. Spectral data are in agreement with literature values<sup>18</sup>.

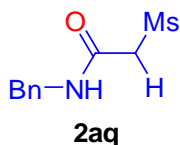

**Condition A:** To a 10 mL Schlenk flask was added ynamide **1aq** (73.2 mg, 0.35 mmol), 4CzIPN (2.8 mg, 0.0035 mmol), and *m*-xylene (2.0 mL, ynamide *concn* = 0.175 M) under a nitrogen atmosphere. The reaction mixture was stirred and irradiated for 2 h at a distance of ~3.5 cm (light intensity: 20 mW/cm<sup>2</sup> at 3.5 cm distance) with 30 W blue LEDs (450 nm) at 30 °C. Water (15.8 μL, 0.88 mmol) was then added, and the mixture was stirred for an additional 0.5 h. After the reaction was determined to be complete by TLC analysis, the reaction mixture was purified by flash silica gel column chromatography [gradient eluent: 10:1~1:1 petroleum ether /EtOAc] to afford  $\alpha$ -sulfonyl amide **2aq** (74.9 mg, 0.33 mmol) in 94% yield.

**Condition B:** To an oven-dried tube was added ynamide **1aq** (73.2 mg, 0.35 mmol), and *m*-xylene (2.0 mL, ynamide *concn* = 0.175 M) under a nitrogen atmosphere. The vessel was sealed and heated to 140 °C with stirring for 2.5 h. Water (15.8 μL, 0.88 mmol) was then added, and the mixture was stirred at 140 °C for an additional 0.5 h. After the reaction was determined to be complete by TLC analysis, the reaction mixture was purified by flash silica gel column chromatography [gradient eluent: 10:1~1:1 petroleum ether /EtOAc] to afford  $\alpha$ -sulfonyl amide **2aq** (16.9 mg, 0.07 mmol) in 21% yield.

**2aq:** *R*<sub>f</sub> = 0.25 [1:1 petroleum ether/EtOAc]; white solid; mp = 118–119 °C; <sup>1</sup>H NMR (400 MHz, CDCl<sub>3</sub>)  $\delta$  7.37–7.28 (m, 5H), 6.89 (t, 1H, *J* = 5.7 Hz), 4.47 (d, 2H, *J* = 5.8 Hz), 3.88 (s, 2H), 3.05 (s, 3H); <sup>13</sup>C NMR (100 MHz, CDCl<sub>3</sub>)  $\delta$  161.5, 137.2, 129.0, 128.0, 127.9, 60.9, 44.3, 41.4; IR (neat) (cm<sup>-1</sup>) 3255m, 2953w, 1648s, 1550m, 1309s, 1128s, 900s, 759m; HRMS (ESI): *m/z* calcd for C<sub>10</sub>H<sub>14</sub>NO<sub>3</sub>S [M + H]<sup>+</sup> 228.0689, found 228.0693.

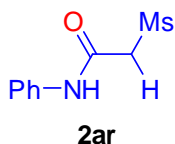

**Condition A:** To a 10 mL Schlenk flask was added ynamide **1ar** (68.3 mg, 0.35 mmol), 4CzIPN (2.8 mg, 0.0035 mmol), and *m*-xylene (2.0 mL, ynamide *concn* = 0.175 M) under a nitrogen atmosphere. The reaction mixture was stirred and irradiated for 4.5 h at a distance of ~3.5 cm (light intensity: 20 mW/cm<sup>2</sup> at 3.5 cm distance) with 30 W blue LEDs (450 nm) at 30 °C. Water (15.8 μL, 0.88 mmol) was then added, and the mixture was stirred for an additional 3 h. After the reaction was



determined to be complete by TLC analysis, the reaction mixture was purified by flash silica gel column chromatography [gradient eluent: 10:1~2:1 petroleum ether /EtOAc] to afford  $\alpha$ -sulfonyl amide **2ar** (60.5 mg, 0.28 mmol) in 81% yield.

**2ar**:  $R_f$  = 0.17 [2:1 petroleum ether/EtOAc]; white solid; mp = 111–112 °C;  $^1\text{H}$  NMR (400 MHz,  $\text{CDCl}_3$ )  $\delta$  8.42 (s, 1H), 7.52 (d, 2H,  $J$  = 7.5 Hz), 7.33 (t, 2H,  $J$  = 7.9 Hz), 7.16 (t, 1H,  $J$  = 7.5 Hz), 4.11 (s, 2H), 3.16 (s, 3H);  $^{13}\text{C}$  NMR (100 MHz,  $\text{CDCl}_3$ )  $\delta$  159.5, 137.1, 129.3, 125.6, 120.4, 61.9, 41.5; IR (neat) ( $\text{cm}^{-1}$ ) 3351m, 2964w, 1683s, 1538s, 1443m, 1294s, 1148m, 913m; HRMS (ESI):  $m/z$  calcd for  $\text{C}_9\text{H}_{12}\text{NO}_3\text{S}$  [ $\text{M} + \text{H}$ ] $^+$  214.0532, found 214.0535.

#### 1.4 Substrate scope of *N*-sulfonyl ynamides in $\alpha$ -sulfonyl nitriles synthesis

All  $\alpha$ -sulfonyl nitriles are novel except for **3g** and **3h**, which are known compounds.

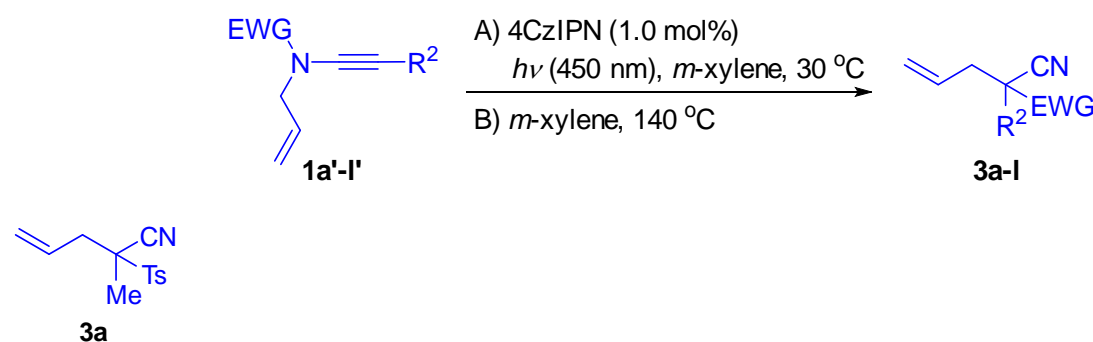

**Condition A:** To a 10 mL Schlenk flask was added ynamide **1a'** (99.7 mg, 0.4 mmol), 4CzIPN (3.2 mg, 0.004 mmol), and *m*-xylene (2.3 mL, ynamide *concn* = 0.175 *M*) under a nitrogen atmosphere. The reaction mixture was stirred and irradiated for 24 h at a distance of ~3.5 cm (light intensity: 20 mW/ $\text{cm}^2$  at 3.5 cm distance) with 30 W blue LEDs (450 nm) at 30 °C. After the reaction was determined to be complete by TLC analysis, the reaction mixture was purified by flash silica gel column chromatography [isocratic eluent: 10:1 petroleum ether /EtOAc] to afford  $\alpha$ -sulfonyl nitrile **3a** (78.8 mg, 0.32 mmol) in 79% yield.

**Condition B:** To an oven-dried tube was added ynamide **1a'** (99.7 mg, 0.4 mmol), and *m*-xylene (2.3 mL, ynamide *concn* = 0.175 *M*) under a nitrogen atmosphere. The vessel was sealed and heated to 140 °C with stirring for 1 h. After the reaction was determined to be complete by TLC analysis, the reaction mixture was purified by flash silica gel column chromatography [isocratic eluent: 10:1 petroleum ether /EtOAc] to afford  $\alpha$ -sulfonyl nitrile **3a** (77.8 mg, 0.31 mmol) in 78% yield.

**Condition A (1.0 mmol synthetic method):** To a 10 mL Schlenk flask was added ynamide **1a'** (249.3 mg, 1.0 mmol), 4CzIPN (7.9 mg, 0.01 mmol), and *m*-xylene (5.7 mL, ynamide *concn* = 0.175 *M*) under a nitrogen atmosphere. The reaction mixture was stirred and irradiated for 24 h at a

distance of ~3.5 cm (light intensity: 20 mW/cm<sup>2</sup> at 3.5 cm distance) with 30 W blue LEDs (450 nm) at 30 °C. After the reaction was determined to be complete by TLC analysis, the reaction mixture was purified by flash silica gel column chromatography [isocratic eluent: 10:1 petroleum ether /EtOAc] to afford  $\alpha$ -sulfonyl nitrile **3a** (187.0 mg, 0.75 mmol) in 75% yield.

**Condition B (1.0 mmol synthetic method):** To an oven-dried tube was added ynamide **1a'** (249.3 mg, 1.0 mmol), and *m*-xylene (5.7 mL, ynamide *concn* = 0.175 M) under a nitrogen atmosphere. The vessel was sealed and heated to 140 °C with stirring for 1 h. After the reaction was determined to be complete by TLC analysis, the reaction mixture was purified by flash silica gel column chromatography [isocratic eluent: 10:1 petroleum ether /EtOAc] to afford  $\alpha$ -sulfonyl nitrile **3a** (192.1mg, 0.77 mmol) in 77% yield.

**3a:**  $R_f$  = 0.38 [10:1 petroleum ether/EtOAc]; white solid; mp = 57–58 °C; <sup>1</sup>H NMR (400 MHz, CDCl<sub>3</sub>)  $\delta$  7.89 (d, 2H,  $J$  = 8.4 Hz), 7.44 (d, 2H,  $J$  = 8.1 Hz), 5.89-5.66 (m, 1H), 5.36-5.26 (m, 2H), 2.83 (dd, 1H,  $J$  = 13.7, 6.3 Hz), 2.58 (dd, 1H,  $J$  = 13.7, 8.4 Hz), 2.49 (s, 3H), 1.61 (s, 3H); <sup>13</sup>C NMR (100 MHz, CDCl<sub>3</sub>)  $\delta$  146.8, 130.9, 130.6, 130.2, 129.2, 122.6, 117.3, 61.6, 37.3, 21.9, 18.4; IR (neat) (cm<sup>-1</sup>) 1639w, 1593m, 1405w, 1321s, 1177w, 1076s, 813s, 732w; HRMS (ESI):  $m/z$  calcd for C<sub>13</sub>H<sub>16</sub>NO<sub>2</sub>S [M + H]<sup>+</sup> 250.0896, found 250.0898.

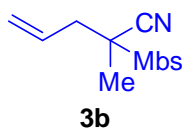

**Condition A:** To a 10 mL Schlenk flask was added ynamide **1b'** (106.1 mg, 0.4 mmol), 4CzIPN (3.2 mg, 0.004 mmol), and *m*-xylene (2.3 mL, ynamide *concn* = 0.175 M) under a nitrogen atmosphere. The reaction mixture was stirred and irradiated for 24 h at a distance of ~3.5 cm (light intensity: 20 mW/cm<sup>2</sup> at 3.5 cm distance) with 30 W blue LEDs (450 nm) at 30 °C. After the reaction was determined to be complete by TLC analysis, the reaction mixture was purified by flash silica gel column chromatography [isocratic eluent: 10:1 petroleum ether /EtOAc] to afford  $\alpha$ -sulfonyl nitrile **3b** (96.6 mg, 0.36 mmol) in 91% yield.

**Condition B:** To an oven-dried tube was added ynamide **1b'** (106.1 mg, 0.4 mmol), and *m*-xylene (2.3 mL, ynamide *concn* = 0.175 M) under a nitrogen atmosphere. The vessel was sealed and heated to 140 °C with stirring for 1 h. After the reaction was determined to be complete by TLC analysis, the reaction mixture was purified by flash silica gel column chromatography [isocratic eluent: 10:1 petroleum ether /EtOAc] to afford  $\alpha$ -sulfonyl nitrile **3b** (95.2 mg, 0.36 mmol) in 90% yield.

**3b:**  $R_f$  = 0.15 [10:1 petroleum ether/EtOAc]; white solid; mp = 88–89 °C; <sup>1</sup>H NMR (400 MHz, CDCl<sub>3</sub>)  $\delta$  7.93 (d, 2H,  $J$  = 9.0 Hz), 7.09 (d, 2H,  $J$  = 9.0 Hz), 5.87-5.72 (m, 1H), 5.39-5.25 (m, 2H),

3.91 (s, 3H), 2.83 (dd, 1H,  $J = 13.7, 6.2$  Hz), 2.58 (dd, 1H,  $J = 13.6, 6.2$  Hz), 1.61 (s, 3H);  $^{13}\text{C}$  NMR (100 MHz,  $\text{CDCl}_3$ )  $\delta$  165.1, 133.1, 129.3, 124.8, 122.4, 117.4, 114.7, 61.7, 55.9, 37.3, 18.4; IR (neat) ( $\text{cm}^{-1}$ ) 2933w, 2242w, 1591s, 1493s, 1415m, 1305s, 1149s, 933s; HRMS (ESI):  $m/z$  calcd for  $\text{C}_{13}\text{H}_{16}\text{NO}_3\text{S}$   $[\text{M} + \text{H}]^+$  266.0845, found 266.0848.

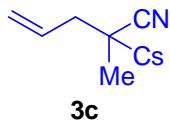

**Condition A:** To a 10 mL Schlenk flask was added ynamide **1c'** (107.9 mg, 0.4 mmol), 4CzIPN (3.2 mg, 0.004 mmol), and *m*-xylene (2.3 mL, ynamide *concn* = 0.175 M) under a nitrogen atmosphere. The reaction mixture was stirred and irradiated for 24 h at a distance of ~3.5 cm (light intensity: 20 mW/cm<sup>2</sup> at 3.5 cm distance) with 30 W blue LEDs (450 nm) at 30 °C. After the reaction was determined to be complete by TLC analysis, the reaction mixture was purified by flash silica gel column chromatography [isocratic eluent: 10:1 petroleum ether /EtOAc] to afford  $\alpha$ -sulfonyl nitrile **3c** (84.3 mg, 0.29 mmol) in 73% yield.

**Condition B:** To an oven-dried tube was added ynamide **1c'** (107.9 mg, 0.4 mmol), and *m*-xylene (2.3 mL, ynamide *concn* = 0.175 M) under a nitrogen atmosphere. The vessel was sealed and heated to 140 °C with stirring for 1 h. After the reaction was determined to be complete by TLC analysis, the reaction mixture was purified by flash silica gel column chromatography [isocratic eluent: 10:1 petroleum ether /EtOAc] to afford  $\alpha$ -sulfonyl nitrile **3c** (97.2 mg, 0.36 mmol) in 90% yield.

**3c:**  $R_f$  = 0.50 [10:1 petroleum ether/EtOAc]; white solid; mp = 77–78 °C;  $^1\text{H}$  NMR (400 MHz,  $\text{CDCl}_3$ )  $\delta$  7.97 (d, 2H,  $J = 8.6$  Hz), 7.63 (d, 2H,  $J = 8.6$  Hz), 5.85–5.72 (m, 1H), 5.38–5.29 (m, 2H), 2.84 (dd, 1H,  $J = 13.7, 6.3$  Hz), 2.60 (dd, 1H,  $J = 13.6, 8.4$  Hz), 1.63 (s, 3H);  $^{13}\text{C}$  NMR (100 MHz,  $\text{CDCl}_3$ )  $\delta$  142.6, 132.4, 132.2, 130.0, 128.9, 123.0, 117.1, 61.8, 37.3, 18.4; IR (neat) ( $\text{cm}^{-1}$ ) 2919m, 2242w, 1639m, 1323s, 1280s, 1153s, 996m, 891w; HRMS (ESI):  $m/z$  calcd for  $\text{C}_{12}\text{H}_{13}\text{ClNO}_2\text{S}$   $[\text{M} + \text{H}]^+$  270.0350, found 270.0349.

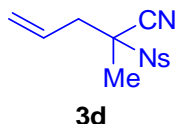

**Condition A:** To a 10 mL Schlenk flask was added ynamide **1d'** (112.1 mg, 0.4 mmol), 4CzIPN (3.2 mg, 0.004 mmol), and *m*-xylene (2.3 mL, ynamide *concn* = 0.175 M) under a nitrogen atmosphere. The reaction mixture was stirred and irradiated for 18 h at a distance of ~3.5 cm (light intensity: 20 mW/cm<sup>2</sup> at 3.5 cm distance) with 30 W blue LEDs (450 nm) at 30 °C. After the reaction was determined to be complete by TLC analysis, the reaction mixture was purified by flash silica gel

column chromatography [isocratic eluent: 10:1 petroleum ether /EtOAc] to afford  $\alpha$ -sulfonyl nitrile **3d** (70.6 mg, 0.25 mmol) in 63% yield.

**Condition B:** To an oven-dried tube was added ynamide **1d'** (112.1 mg, 0.4 mmol), and *m*-xylene (2.3 mL, ynamide *concn* = 0.175 M) under a nitrogen atmosphere. The vessel was sealed and heated to 140 °C with stirring for 1 h. After the reaction was determined to be complete by TLC analysis, the reaction mixture was purified by flash silica gel column chromatography [isocratic eluent: 10:1 petroleum ether /EtOAc] to afford  $\alpha$ -sulfonyl nitrile **3d** (104.9 mg, 0.37 mmol) in 94% yield.

**3d:**  $R_f$  = 0.23 [10:1 petroleum ether/EtOAc]; white solid; mp = 117–118 °C;  $^1\text{H}$  NMR (400 MHz,  $\text{CDCl}_3$ )  $\delta$  8.49 (d, 2H,  $J$  = 8.9 Hz), 8.25 (d, 2H,  $J$  = 8.9 Hz), 5.87–5.70 (m, 1H), 5.44–5.26 (m, 2H), 2.85 (dd, 1H,  $J$  = 13.6, 6.3 Hz), 2.65 (dd, 1H,  $J$  = 13.6, 8.3 Hz), 1.66 (s, 3H);  $^{13}\text{C}$  NMR (100 MHz,  $\text{CDCl}_3$ )  $\delta$  151.8, 139.4, 132.6, 128.4, 124.6, 123.4, 116.7, 62.1, 37.1, 18.3; IR (neat) ( $\text{cm}^{-1}$ ) 2912w, 2242w, 1606m, 1531s, 1355s, 1153s, 970m, 855s; HRMS (ESI):  $m/z$  calcd for  $\text{C}_{12}\text{H}_{12}\text{N}_2\text{NaO}_4\text{S}$  [ $\text{M} + \text{Na}$ ] $^+$  303.0410, found 303.0413.

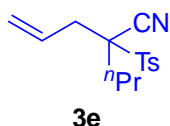

**Condition A:** To a 10 mL Schlenk flask was added ynamide **1e'** (111.0 mg, 0.4 mmol), 4CzIPN (3.2 mg, 0.004 mmol), and *m*-xylene (2.3 mL, ynamide *concn* = 0.175 M) under a nitrogen atmosphere. The reaction mixture was stirred and irradiated for 24 h at a distance of ~3.5 cm (light intensity: 20 mW/cm<sup>2</sup> at 3.5 cm distance) with 30 W blue LEDs (450 nm) at 30 °C. After the reaction was determined to be complete by TLC analysis, the reaction mixture was purified by flash silica gel column chromatography [isocratic eluent: 10:1 petroleum ether /EtOAc] to afford  $\alpha$ -sulfonyl nitrile **3e** (80.3 mg, 0.29 mmol) in 72% yield.

**Condition B:** To an oven-dried tube was added ynamide **1e'** (111.0 mg, 0.4 mmol), and *m*-xylene (2.3 mL, ynamide *concn* = 0.175 M) under a nitrogen atmosphere. The vessel was sealed and heated to 140 °C with stirring for 1 h. After the reaction was determined to be complete by TLC analysis, the reaction mixture was purified by flash silica gel column chromatography [isocratic eluent: 10:1 petroleum ether /EtOAc] to afford  $\alpha$ -sulfonyl nitrile **3e** (98.7 mg, 0.36 mmol) in 89% yield.

**3e:**  $R_f$  = 0.34 [10:1 petroleum ether/EtOAc]; colorless oil;  $^1\text{H}$  NMR (400 MHz,  $\text{CDCl}_3$ )  $\delta$  7.89 (d, 2H,  $J$  = 8.4 Hz), 7.43 (d, 2H,  $J$  = 8.1 Hz), 5.90–5.75 (m, 1H), 5.31–5.20 (m, 2H), 2.71 (d, 2H,  $J$  = 6.8 Hz), 2.49 (s, 3H), 2.05–1.86 (m, 2H), 1.68–1.50 (m, 2H), 0.94 (t, 3H,  $J$  = 7.3 Hz);  $^{13}\text{C}$  NMR (100 MHz,  $\text{CDCl}_3$ )  $\delta$  146.6, 131.5, 130.8, 130.1, 129.7, 121.6, 116.8, 65.8, 36.8, 33.4, 21.9, 18.5, 14.1; IR (neat) ( $\text{cm}^{-1}$ ) 2967m, 2238w, 1595s, 1442m, 1326s, 1149s, 929s, 814s; HRMS (ESI):  $m/z$  calcd for

C<sub>15</sub>H<sub>20</sub>NO<sub>2</sub>S [M + H]<sup>+</sup> 278.1209, found 278.1212.

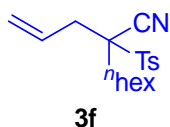

**Condition A:** To a 10 mL Schlenk flask was added ynamide **1f'** (127.8 mg, 0.4 mmol), 4CzIPN (3.2 mg, 0.004 mmol), and *m*-xylene (2.3 mL, ynamide *concn* = 0.175 M) under a nitrogen atmosphere. The reaction mixture was stirred and irradiated for 24 h at a distance of ~3.5 cm (light intensity: 20 mW/cm<sup>2</sup> at 3.5 cm distance) with 30 W blue LEDs (450 nm) at 30 °C. After the reaction was determined to be complete by TLC analysis, the reaction mixture was purified by flash silica gel column chromatography [isocratic eluent: 10:1 petroleum ether /EtOAc] to afford  $\alpha$ -sulfonyl nitrile **3f** (103.4 mg, 0.32 mmol) in 81% yield.

**Condition B:** To an oven-dried tube was added ynamide **1f'** (127.8 mg, 0.4 mmol), and *m*-xylene (2.3 mL, ynamide *concn* = 0.175 M) under a nitrogen atmosphere. The vessel was sealed and heated to 140 °C with stirring for 1 h. After the reaction was determined to be complete by TLC analysis, the reaction mixture was purified by flash silica gel column chromatography [isocratic eluent: 10:1 petroleum ether /EtOAc] to afford  $\alpha$ -sulfonyl nitrile **3f** (112.6 mg, 0.35 mmol) in 88% yield.

**3f:** *R<sub>f</sub>* = 0.50 [10:1 petroleum ether/EtOAc]; colorless oil; <sup>1</sup>H NMR (400 MHz, CDCl<sub>3</sub>)  $\delta$  7.81 (d, 2H, *J* = 8.4 Hz), 7.34 (d, 2H, *J* = 8.1 Hz), 5.82-5.67 (m, 1H), 5.23-5.12 (m, 2H), 2.63 (d, 2H, *J* = 7.2 Hz), 2.41 (s, 3H), 1.98-1.80 (m, 2H), 1.54-1.37 (m, 2H), 1.26-1.14 (m, 6H), 0.79 (t, 3H, *J* = 7.0 Hz); <sup>13</sup>C NMR (100 MHz, CDCl<sub>3</sub>)  $\delta$  146.6, 131.5, 130.8, 130.1, 129.7, 121.6, 116.8, 65.8, 36.8, 31.41, 31.37, 29.2, 24.8, 22.5, 21.9, 14.1; IR (neat) (cm<sup>-1</sup>) 2927m, 2237w, 1595m, 1328s, 1149s, 1084s, 928m, 814s; HRMS (ESI): *m/z* calcd for C<sub>18</sub>H<sub>26</sub>NO<sub>2</sub>S [M + H]<sup>+</sup> 320.1679, found 320.1682.

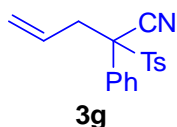

**Condition A:** To a 10 mL Schlenk flask was added ynamide **1g'** (124.6 mg, 0.4 mmol), 4CzIPN (3.2 mg, 0.004 mmol), and *m*-xylene (2.3 mL, ynamide *concn* = 0.175 M) under a nitrogen atmosphere. The reaction mixture was stirred and irradiated for 30 h at a distance of ~3.5 cm (light intensity: 20 mW/cm<sup>2</sup> at 3.5 cm distance) with 30 W blue LEDs (450 nm) at 30 °C. After the reaction was determined to be complete by TLC analysis, the reaction mixture was purified by flash silica gel column chromatography [isocratic eluent: 10:1 petroleum ether /EtOAc] to afford  $\alpha$ -sulfonyl nitrile **3g** (63.0 mg, 0.20 mmol) in 51% yield.

**Condition B:** To an oven-dried tube was added ynamide **1g'** (124.6 mg, 0.4 mmol), and *m*-xylene

(2.3 mL, ynamide *concn* = 0.175 M) under a nitrogen atmosphere. The vessel was sealed and heated to 140 °C with stirring for 18 h. After the reaction was determined to be complete by TLC analysis, the reaction mixture was purified by flash silica gel column chromatography [isocratic eluent: 10:1 petroleum ether /EtOAc] to afford  $\alpha$ -sulfonyl nitrile **3g** (76.8 mg, 0.25 mmol) in 62% yield.

**3g**:  $R_f$  = 0.29 [10:1 petroleum ether/EtOAc]; white solid;  $^1\text{H}$  NMR (400 MHz,  $\text{CDCl}_3$ )  $\delta$  7.46-7.36 (m, 5H), 7.35-7.28 (m, 2H), 7.19 (d, 2H,  $J$  = 8.1 Hz), 5.61-5.48 (m, 1H), 5.30 (dd, 1H,  $J$  = 16.9, 1.4 Hz), 5.18 (d, 1H,  $J$  = 10.0 Hz), 3.46 (dd, 1H,  $J$  = 14.1, 6.7 Hz), 3.32 (dd, 1H,  $J$  = 14.1, 7.4 Hz), 2.40 (s, 3H);  $^{13}\text{C}$  NMR (100 MHz,  $\text{CDCl}_3$ )  $\delta$  146.4, 130.8, 130.7, 130.2, 129.6, 129.1, 128.88, 128.86, 128.4, 122.2, 116.3, 72.0, 35.9, 21.9. Spectral data are in agreement with literature values<sup>19</sup>.

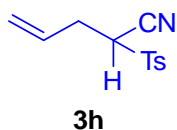

**Condition A**: To a 10 mL Schlenk flask was added ynamide **1h'** (94.1 mg, 0.4 mmol), 4CzIPN (3.2 mg, 0.004 mmol), and *m*-xylene (2.3 mL, ynamide *concn* = 0.175 M) under a nitrogen atmosphere. The reaction mixture was stirred and irradiated for 32 h at a distance of ~3.5 cm (light intensity: 20 mW/cm<sup>2</sup> at 3.5 cm distance) with 30 W blue LEDs (450 nm) at 30 °C. After the reaction was determined to be complete by TLC analysis, the reaction mixture was purified by flash silica gel column chromatography [isocratic eluent: 10:1 petroleum ether /EtOAc] to afford  $\alpha$ -sulfonyl nitrile **3h** (63.4 mg, 0.27 mmol) in 67% yield.

**Condition B**: To an oven-dried tube was added ynamide **1h'** (94.1 mg, 0.4 mmol), and *m*-xylene (2.3 mL, ynamide *concn* = 0.175 M) under a nitrogen atmosphere. The vessel was sealed and heated to 140 °C with stirring for 1 h. After the reaction was determined to be complete by TLC analysis, the reaction mixture was purified by flash silica gel column chromatography [isocratic eluent: 10:1 petroleum ether /EtOAc] to afford  $\alpha$ -sulfonyl nitrile **3h** (10.2 mg, 0.04 mmol) in 11% yield.

**3h**:  $R_f$  = 0.25 [10:1 petroleum ether/EtOAc]; colorless oil;  $^1\text{H}$  NMR (400 MHz,  $\text{CDCl}_3$ )  $\delta$  7.90 (d, 2H,  $J$  = 8.4 Hz), 7.45 (d, 2H,  $J$  = 8.0 Hz), 5.86-5.72 (m, 1H), 5.36-5.24 (m, 2H), 3.93 (dd, 1H,  $J$  = 10.9, 4.4 Hz), 3.00-2.91 (m, 1H), 2.67-2.56 (m, 1H), 2.50 (s, 3H);  $^{13}\text{C}$  NMR (100 MHz,  $\text{CDCl}_3$ )  $\delta$  147.0, 132.6, 130.5, 130.0, 129.9, 121.3, 113.9, 57.4, 31.2, 22.0. Spectral data are in agreement with literature values<sup>19</sup>.

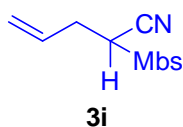

**Condition A**: To a 10 mL Schlenk flask was added ynamide **1i'** (100.5 mg, 0.4 mmol), 4CzIPN

(3.2 mg, 0.004 mmol), and *m*-xylene (2.3 mL, ynamide *concn* = 0.175 M) under a nitrogen atmosphere. The reaction mixture was stirred and irradiated for 4 h at a distance of ~3.5 cm (light intensity: 20 mW/cm<sup>2</sup> at 3.5 cm distance) with 30 W blue LEDs (450 nm) at 30 °C. After the reaction was determined to be complete by TLC analysis, the reaction mixture was purified by flash silica gel column chromatography [gradient eluent: 10:1~3:1 petroleum ether /EtOAc] to afford  $\alpha$ -sulfonyl nitrile **3i** (78.1 mg, 0.31 mmol) in 78% yield.

**Condition B:** To an oven-dried tube was added ynamide **1i'** (100.5 mg, 0.4 mmol), and *m*-xylene (2.3 mL, ynamide *concn* = 0.175 M) under a nitrogen atmosphere. The vessel was sealed and heated to 140 °C with stirring for 1 h. After the reaction was determined to be complete by TLC analysis, the reaction mixture was purified by flash silica gel column chromatography [gradient eluent: 10:1~3:1 petroleum ether /EtOAc] to afford  $\alpha$ -sulfonyl nitrile **3i** (8.3 mg, 0.03 mmol) in 8% yield.

**3i:**  $R_f$  = 0.42 [3:1 petroleum ether/EtOAc]; white solid; mp = 62–63 °C; <sup>1</sup>H NMR (400 MHz, CDCl<sub>3</sub>)  $\delta$  7.93 (d, 2H,  $J$  = 9.0 Hz), 7.09 (d, 2H,  $J$  = 9.0 Hz), 5.86-5.71 (m, 1H), 5.35-5.23 (m, 2H), 3.97 (dd, 1H,  $J$  = 10.8, 4.4 Hz), 3.92 (s, 3H), 2.99-2.88 (m, 1H), 2.65-2.55 (m, 1H); <sup>13</sup>C NMR (100 MHz, CDCl<sub>3</sub>)  $\delta$  165.2, 132.1, 130.1, 126.7, 121.1, 115.0, 114.0, 57.5, 56.0, 31.3; IR (neat) (cm<sup>-1</sup>) 2948m, 2241w, 1642w, 1496s, 1332s, 1142s, 941s, 814m; HRMS (ESI):  $m/z$  calcd for C<sub>12</sub>H<sub>14</sub>NO<sub>3</sub>S [M + H]<sup>+</sup> 252.0689, found 252.0691.

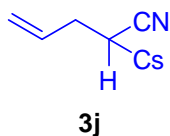

**Condition A:** To a 10 mL Schlenk flask was added ynamide **1j'** (102.3 mg, 0.4 mmol), 4CzIPN (3.2 mg, 0.004 mmol), and *m*-xylene (2.3 mL, ynamide *concn* = 0.175 M) under a nitrogen atmosphere. The reaction mixture was stirred and irradiated for 29 h at a distance of ~3.5 cm (light intensity: 20 mW/cm<sup>2</sup> at 3.5 cm distance) with 30 W blue LEDs (450 nm) at 30 °C. After the reaction was determined to be complete by TLC analysis, the reaction mixture was purified by flash silica gel column chromatography [isocratic eluent: 10:1 petroleum ether /EtOAc] to afford  $\alpha$ -sulfonyl nitrile **3j** (59.3 mg, 0.23 mmol) in 58% yield.

**Condition B:** To an oven-dried tube was added ynamide **1j'** (102.3 mg, 0.4 mmol), and *m*-xylene (2.3 mL, ynamide *concn* = 0.175 M) under a nitrogen atmosphere. The vessel was sealed and heated to 140 °C with stirring for 1 h. After the reaction was determined to be complete by TLC analysis, the reaction mixture was purified by flash silica gel column chromatography [isocratic eluent: 10:1 petroleum ether /EtOAc] to afford  $\alpha$ -sulfonyl nitrile **3j** (7.5 mg, 0.03 mmol) in 7% yield.

**3j:**  $R_f$  = 0.30 [10:1 petroleum ether/EtOAc]; yellow oil; <sup>1</sup>H NMR (400 MHz, CDCl<sub>3</sub>)  $\delta$  7.96 (d, 2H,  $J$



= 8.7 Hz), 7.64 (d, 2H,  $J$  = 8.6 Hz), 5.85-5.72 (m, 1H), 5.36-5.26 (m, 2H), 3.98 (dd, 1H,  $J$  = 10.8, 4.4 Hz), 3.00-2.91 (m, 1H), 2.70-2.56 (m, 1H);  $^{13}\text{C}$  NMR (100 MHz,  $\text{CDCl}_3$ )  $\delta$  142.7, 133.9, 131.3, 130.3, 129.7, 121.5, 113.6, 57.4, 31.1; IR (neat) ( $\text{cm}^{-1}$ ) 2926w, 2246w, 1579s, 1475s, 1335s, 1218w, 991m, 830s; HRMS (ESI):  $m/z$  calcd for  $\text{C}_{11}\text{H}_{10}\text{ClNNaO}_2\text{S}$  [ $\text{M} + \text{Na}$ ] $^{+}$  278.0013, found 278.0015.

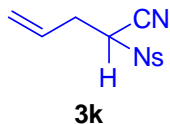

**Condition A:** To a 10 mL Schlenk flask was added ynamide **1k'** (106.5 mg, 0.4 mmol), 4CzIPN (3.2 mg, 0.004 mmol), and *m*-xylene (2.3 mL, ynamide *concn* = 0.175 M) under a nitrogen atmosphere. The reaction mixture was stirred and irradiated for 32 h at a distance of ~3.5 cm (light intensity: 20 mW/cm<sup>2</sup> at 3.5 cm distance) with 30 W blue LEDs (450 nm) at 30 °C. After the reaction was determined to be complete by TLC analysis, the reaction mixture was purified by flash silica gel column chromatography [gradient eluent: 10:1~4:1 petroleum ether /EtOAc] to afford  $\alpha$ -sulfonyl nitrile **3k** (43.7 mg, 0.16 mmol) in 41% yield.

**Condition B:** To an oven-dried tube was added ynamide **1k'** (106.5 mg, 0.4 mmol), and *m*-xylene (2.3 mL, ynamide *concn* = 0.175 M) under a nitrogen atmosphere. The vessel was sealed and heated to 140 °C with stirring for 1 h. After the reaction was determined to be complete by TLC analysis, the reaction mixture was purified by flash silica gel column chromatography [gradient eluent: 10:1~4:1 petroleum ether /EtOAc] to afford  $\alpha$ -sulfonyl nitrile **3k** (29.7 mg, 0.11 mmol) in 28% yield.

**3k:**  $R_f$  = 0.34 [4:1 petroleum ether/EtOAc]; colorless oil;  $^1\text{H}$  NMR (400 MHz,  $\text{CDCl}_3$ )  $\delta$  8.50 (d, 2H,  $J$  = 8.8 Hz), 8.25 (d, 2H,  $J$  = 8.8 Hz), 5.86-5.72 (m, 1H), 5.38-5.31 (m, 2H), 4.02 (dd, 1H,  $J$  = 10.6, 4.5 Hz), 3.06-2.96 (m, 1H), 2.74-2.63 (m, 1H);  $^{13}\text{C}$  NMR (100 MHz,  $\text{CDCl}_3$ )  $\delta$  152.0, 141.1, 131.5, 129.3, 125.0, 122.0, 113.2, 57.4, 30.9; IR (neat) ( $\text{cm}^{-1}$ ) 2912w, 2246w, 1591s, 1531s, 1440m, 1147s, 939s, 855m; HRMS (ESI):  $m/z$  calcd for  $\text{C}_{11}\text{H}_9\text{N}_2\text{O}_4\text{S}$  [ $\text{M} - \text{H}$ ] $^{-}$  265.0288, found 265.0290.

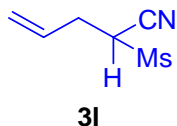

**Condition A:** To a 10 mL Schlenk flask was added ynamide **1l'** (63.7 mg, 0.4 mmol), 4CzIPN (3.2 mg, 0.004 mmol), and *m*-xylene (2.3 mL, ynamide *concn* = 0.175 M) under a nitrogen atmosphere. The reaction mixture was stirred and irradiated for 37 h at a distance of ~3.5 cm (light intensity: 20 mW/cm<sup>2</sup> at 3.5 cm distance) with 30 W blue LEDs (450 nm) at 30 °C. After the reaction was determined to be complete by TLC analysis, the reaction mixture was purified by flash silica gel column chromatography [gradient eluent: 10:1~2:1 petroleum ether /EtOAc] to afford  $\alpha$ -sulfonyl

nitrile **3l** (36.7 mg, 0.23 mmol) in 58% yield.

**3l**:  $R_f$  = 0.50 [2:1 petroleum ether/EtOAc]; yellow oil;  $^1\text{H}$  NMR (400 MHz,  $\text{CDCl}_3$ )  $\delta$  5.93-5.79 (m, 1H), 5.44-5.32 (m, 2H), 4.04-3.94 (m, 1H), 3.18 (s, 3H), 3.00-2.88 (m, 1H), 2.84-2.71 (m, 1H);  $^{13}\text{C}$  NMR (100 MHz,  $\text{CDCl}_3$ )  $\delta$  129.7, 121.7, 113.8, 55.4, 39.7, 30.2; IR (neat) ( $\text{cm}^{-1}$ ) 2930m, 2362w, 1642w, 1412w, 1318s, 1146s, 985m, 836s; HRMS (ESI):  $m/z$  calcd for  $\text{C}_6\text{H}_9\text{NNaO}_2\text{S}$  [ $\text{M} + \text{Na}$ ] $^+$  182.0246, found 182.0246.

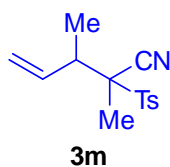

**Condition A**: To a 10 mL Schlenk flask was added ynamide **1m'** (105.3 mg, 0.4 mmol), 4CzIPN (3.2 mg, 0.004 mmol), and *m*-xylene (2.3 mL, ynamide *concn* = 0.175 M) under a nitrogen atmosphere. The reaction mixture was stirred and irradiated for 24 h at a distance of ~3.5 cm (light intensity: 20 mW/cm<sup>2</sup> at 3.5 cm distance) with 30 W blue LEDs (450 nm) at 30 °C. After the reaction was determined to be complete by TLC analysis, the reaction mixture was purified by flash silica gel column chromatography [gradient eluent: 15:1~5:1 petroleum ether /EtOAc] to afford  $\alpha$ -sulfonyl nitrile **3m** (64.7 mg, 0.25 mmol) in 61% yield.

**Condition B**: To an oven-dried tube was added ynamide **1m'** (105.3 mg, 0.4 mmol), and *m*-xylene (2.3 mL, ynamide *concn* = 0.175 M) under a nitrogen atmosphere. The vessel was sealed and heated to 140 °C with stirring for 3.5 h. After the reaction was determined to be complete by TLC analysis, the reaction mixture was purified by flash silica gel column chromatography [gradient eluent: 15:1~5:1 petroleum ether /EtOAc] to afford  $\alpha$ -sulfonyl nitrile **3m** (55.0 mg, 0.21 mmol) in 52% yield.

**3m**:  $R_f$  = 0.24 [10:1 petroleum ether/EtOAc]; yellow oil;  $^1\text{H}$  NMR (400 MHz,  $\text{CDCl}_3$ )  $\delta$  7.89 (d, 2H,  $J$  = 8.3 Hz), 7.42-7.40 (m, 2H), 5.92 (ddd, 1H,  $J$  = 17.6, 10.2, 7.9 Hz), 5.27-5.23 (m, 2H), 3.08 (p, 1H,  $J$  = 6.9 Hz), 2.49 (s, 3H), 1.58 (s, 3H), 1.34 (d, 3H,  $J$  = 6.9 Hz);  $^{13}\text{C}$  NMR (100 MHz,  $\text{CDCl}_3$ )  $\delta$  146.6, 136.7, 132.0, 130.9, 130.0, 118.8, 117.8, 65.5, 41.0, 22.0, 16.5, 15.2; IR (neat) ( $\text{cm}^{-1}$ ) 2918w, 1637m, 1329m, 1151s, 1075w, 816w, 785w; HRMS (ESI):  $m/z$  calcd for  $\text{C}_{14}\text{H}_{18}\text{NO}_2\text{S}$  [ $\text{M} + \text{H}$ ] $^+$  264.1053, found 264.1051.

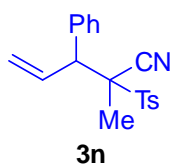

**Condition A:** To a 10 mL Schlenk flask was added ynamide **1n'** (130.2 mg, 0.4 mmol), 4CzIPN (3.2 mg, 0.004 mmol), and *m*-xylene (2.3 mL, ynamide *concn* = 0.175 M) under a nitrogen atmosphere. The reaction mixture was stirred and irradiated for 24 h at a distance of ~3.5 cm (light intensity: 20 mW/cm<sup>2</sup> at 3.5 cm distance) with 30 W blue LEDs (450 nm) at 30 °C. After the reaction was determined to be complete by TLC analysis, the reaction mixture was purified by flash silica gel column chromatography [gradient eluent: 15:1~5:1 petroleum ether /EtOAc] to afford  $\alpha$ -sulfonyl nitrile **3n** (34.9 mg, 0.107 mmol) in 27% yield.

**Condition B:** To an oven-dried tube was added ynamide **1n'** (130.2 mg, 0.4 mmol), and *m*-xylene (2.3 mL, ynamide *concn* = 0.175 M) under a nitrogen atmosphere. The vessel was sealed and heated to 140 °C with stirring for 1.5 h. After the reaction was determined to be complete by TLC analysis, the reaction mixture was purified by flash silica gel column chromatography [gradient eluent: 10:1~5:1 petroleum ether /EtOAc] to afford  $\alpha$ -sulfonyl nitrile **3n** (58.8 mg, 0.18 mmol) in 45% yield.

**3n:**  $R_f$  = 0.23 [10:1 petroleum ether/EtOAc]; white solid; mp = 86–87 °C; <sup>1</sup>H NMR (400 MHz, CDCl<sub>3</sub>)  $\delta$  7.90 (d, 2H,  $J$  = 8.3 Hz), 7.40 (d, 2H,  $J$  = 8.1 Hz), 7.35–7.26 (m, 5H), 6.44 (ddd, 1H,  $J$  = 16.8, 10.3, 8.5 Hz), 5.24–5.18 (m, 2H), 4.11 (d, 1H,  $J$  = 8.6 Hz), 2.48 (s, 3H), 1.26 (s, 3H); <sup>13</sup>C NMR (100 MHz, CDCl<sub>3</sub>)  $\delta$  146.6, 138.4, 135.5, 132.5, 131.4, 130.1, 129.3, 128.9, 128.3, 119.6, 117.4, 65.5, 52.2, 22.0, 21.1; IR (neat) (cm<sup>-1</sup>) 2923m, 2852w, 2070w, 1452m, 1326m, 1148s, 926m; HRMS (ESI):  $m/z$  calcd for C<sub>19</sub>H<sub>20</sub>NO<sub>2</sub>S [M + H]<sup>+</sup> 326.1209, found 326.1207.

## 1.5 Gram-scale experiments and a synthetic application

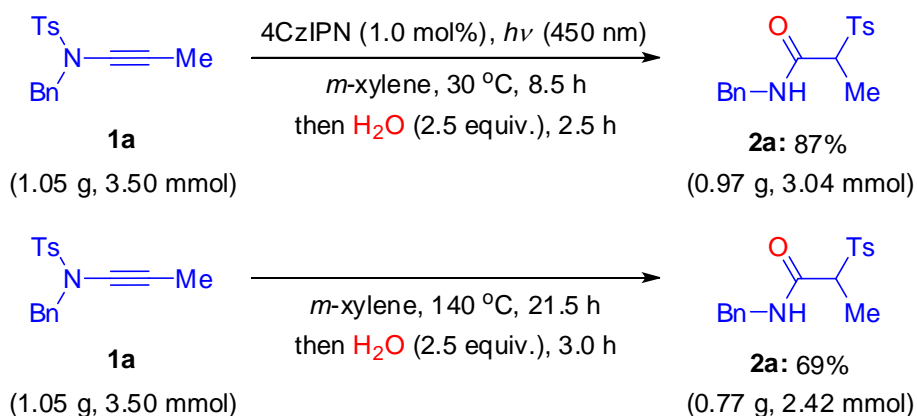

**Condition A (gram-scale procedure):** To a Schlenk flask was added ynamide **1a** (1.05 g, 3.50 mmol), 4CzIPN (27.6 mg, 0.035 mmol), and *m*-xylene (20.0 mL, ynamide *concn* = 0.175 M) under a nitrogen atmosphere. After 8.5 h of irradiation at a distance of ~3.5 cm (light intensity: 20 mW/cm<sup>2</sup> at 3.5 cm distance) with 30 W blue LEDs (450 nm) at 30 °C, water (157.5  $\mu$ L, 8.75 mmol) was then added, and the mixture was stirred for an additional 2.5 h. After the reaction was determined to be

complete by TLC analysis, the reaction mixture was purified by flash silica gel column chromatography [gradient eluent: 10:1~2:1 petroleum ether /EtOAc] to afford  $\alpha$ -sulfonyl amide **2a** (0.97 g, 3.04 mmol) in 87% yield.

**Condition B (gram-scale procedure):** To an oven-dried tube was added ynamide **1a** (1.05 g, 3.50 mmol), and *m*-xylene (20.0 mL, ynamide *concn* = 0.175 M) under a nitrogen atmosphere. The vessel was sealed and heated to 140 °C with stirring for 21.5 h. Water (157.5  $\mu$ L, 8.75 mmol) was then added, and the mixture was stirred at 140 °C for an additional 3.0 h. After the reaction was determined to be complete by TLC analysis, the reaction mixture was purified by flash silica gel column chromatography [gradient eluent: 10:1~2:1 petroleum ether /EtOAc] to afford  $\alpha$ -sulfonyl amide **2a** (0.77 g, 2.42 mmol) in 69% yield.

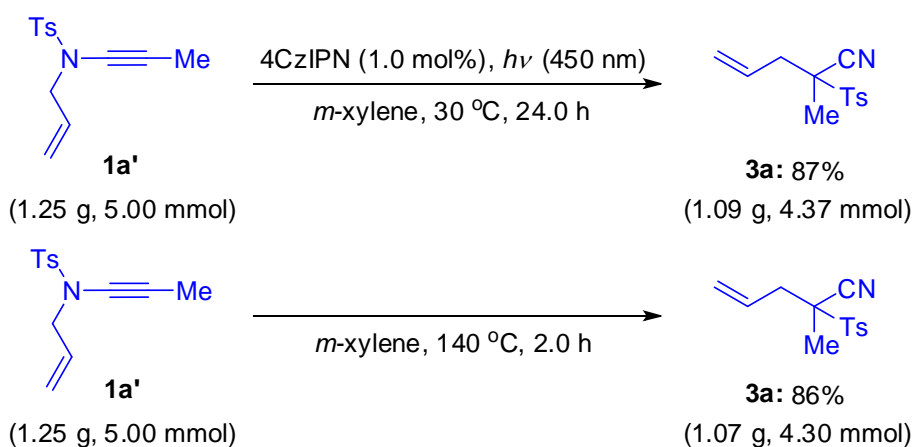

**Condition A (gram-scale procedure):** To a Schlenk flask was added ynamide **1a'** (1.25 g, 5.00 mmol), 4CzIPN (39.4 mg, 0.05 mmol), and *m*-xylene (28.6 mL, ynamide *concn* = 0.175 M) under a nitrogen atmosphere. The reaction mixture was stirred and irradiated for 24.0 h at a distance of ~3.5 cm (light intensity: 20 mW/cm<sup>2</sup> at 3.5 cm distance) with 30 W blue LEDs (450 nm) at 30 °C. After the reaction was determined to be complete by TLC analysis, the reaction mixture was purified by flash silica gel column chromatography [isocratic eluent: 10:1 petroleum ether /EtOAc] to afford  $\alpha$ -sulfonyl nitrile **3a** (1.09 g, 4.37 mmol) in 87% yield.

**Condition B (gram-scale procedure):** To an oven-dried tube was added ynamide **1a'** (1.25 g, 5.00 mmol), and *m*-xylene (28.6 mL, ynamide *concn* = 0.175 M) under a nitrogen atmosphere. The vessel was sealed and heated to 140 °C with stirring for 2.0 h. After the reaction was determined to be complete by TLC analysis, the reaction mixture was purified by flash silica gel column chromatography [isocratic eluent: 10:1 petroleum ether /EtOAc] to afford  $\alpha$ -sulfonyl nitrile **3a** (1.07 g, 4.30 mmol) in 86% yield.

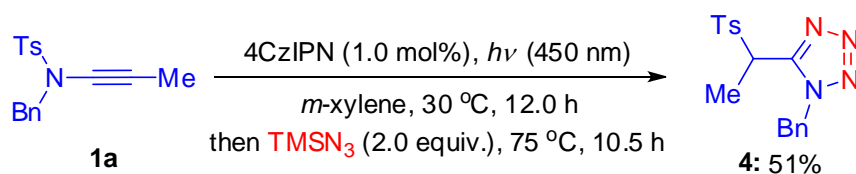

To a 10 mL Schlenk flask was added ynamide **1a** (104.8 mg, 0.35 mmol), 4CzIPN (2.8 mg, 0.0035 mmol), and *m*-xylene (2.0 mL, ynamide *concn* = 0.175 M) under a nitrogen atmosphere. The reaction mixture was stirred and irradiated for 12 h at a distance of ~3.5 cm (light intensity: 20 mW/cm<sup>2</sup> at 3.5 cm distance) with 30 W blue LEDs (450 nm) at 30 °C. TMSN<sub>3</sub> (80.6 mg, 0.7 mmol) was then added, and the mixture was stirred in an oil bath and heated at 75 °C for 10.5 h. After the reaction was determined to be complete by TLC analysis, the reaction mixture was purified by flash silica gel column chromatography [gradient eluent: 10:1~2:1 petroleum ether /EtOAc] to afford  $\alpha$ -sulfonyl amide **4** (60.8 mg, 0.18 mmol) in 51% yield.

**4:** *R*<sub>f</sub> = 0.35 [2:1 petroleum ether/EtOAc]; white solid; mp = 162–163 °C; <sup>1</sup>H NMR (400 MHz, CDCl<sub>3</sub>)  $\delta$  7.40–7.38 (m, 5H), 7.31 (d, 2H, *J* = 8.1 Hz), 7.24 (dd, 2H, *J* = 7.2, 2.3 Hz), 5.98 (d, 1H, *J* = 15.5 Hz), 5.80 (d, 1H, *J* = 15.6 Hz), 4.37 (q, 1H, *J* = 7.1 Hz), 2.44 (s, 3H), 1.62 (d, 3H, *J* = 7.1 Hz); <sup>13</sup>C NMR (100 MHz, CDCl<sub>3</sub>)  $\delta$  150.1, 146.5, 133.0, 130.7, 130.0, 129.8, 129.6, 129.3, 127.8, 56.3, 51.9, 21.9, 14.1; IR (neat) (cm<sup>-1</sup>) 2922w, 1499m, 1312m, 1149s, 1085w, 820m, 751m; HRMS (ESI): *m/z* calcd for C<sub>17</sub>H<sub>19</sub>N<sub>4</sub>O<sub>2</sub>S [M + H]<sup>+</sup> 343.1223, found 343.1222.

## 1.6 Control experiments

**Condition A:** To a 10 mL Schlenk flask was added ynamide **1a** (104.8 mg, 0.35 mmol), 4CzIPN (2.8 mg, 0.0035 mmol), BHT (154.2mg, 0.70 mmol) or TEMPO (109.4 mg, 0.70 mmol), and *m*-xylene (2.0 mL, ynamide *concn* = 0.175 M) under a nitrogen atmosphere. The reaction mixture was stirred and irradiated for 6.5 h at a distance of ~3.5 cm (light intensity: 20 mW/cm<sup>2</sup> at 3.5 cm distance) with 30 W blue LEDs (450 nm) at 30 °C. Water (15.8  $\mu$ L, 0.88 mmol) was then added, and the mixture was stirred for an additional 1 h. After the reaction was determined to be complete by TLC analysis, the reaction mixture was purified by flash silica gel column chromatography [isocratic eluent: 10:1 petroleum ether /EtOAc] to recover ynamide **1a** (100.2 mg, 0.33 mmol) with a recovery rate of 96% or recover ynamide **1a** (99.1 mg, 0.33 mmol) with a recovery rate of 95%.

**Condition B:** To an oven-dried tube was added ynamide **1a** (104.8 mg, 0.35 mmol), BHT (154.2mg, 0.70 mmol) or TEMPO (109.4 mg, 0.70 mmol), and *m*-xylene (2.0 mL, ynamide *concn* = 0.175 M) under a nitrogen atmosphere. The vessel was sealed and heated to 140 °C with stirring for 8.5 h. Water (15.8  $\mu$ L, 0.88 mmol) was then added, and the mixture was stirred at 140 °C for an

additional 1 h. After the reaction was determined to be complete by TLC analysis, the reaction mixture was purified by flash silica gel column chromatography [isocratic eluent: 10:1 petroleum ether /EtOAc] to recover ynamide **1a** (98.7 mg, 0.33 mmol) with a recovery rate of 94% or recover ynamide **1a** (98.2 mg, 0.33 mmol) with a recovery rate of 94%.

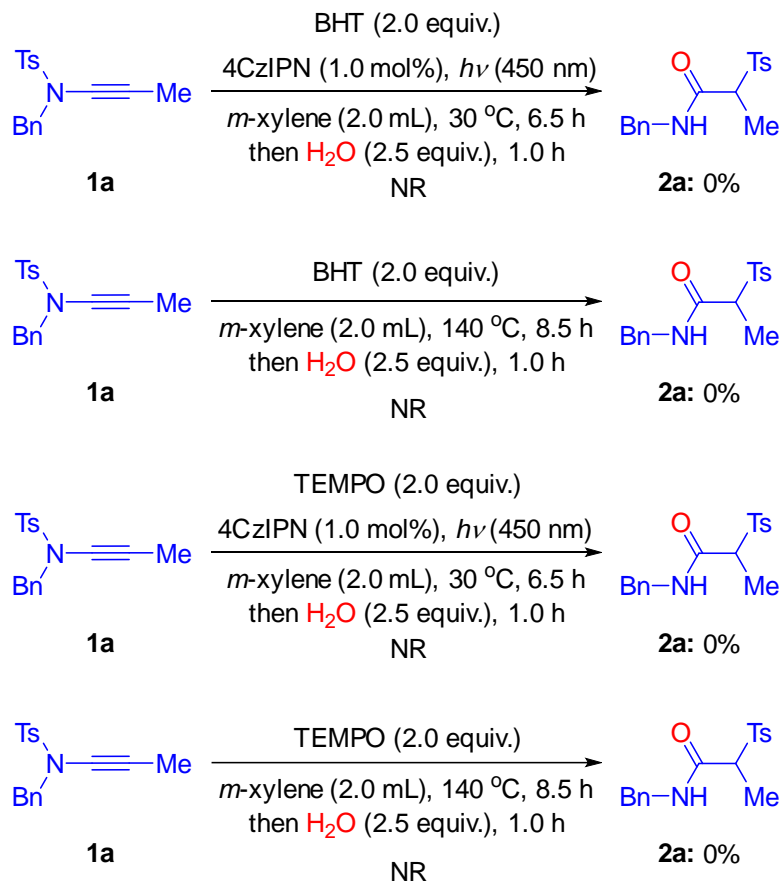

## References

- 1 H. Liu, Y. Yang, J. Wu, X.-N. Wang and J. Chang, Regioselective synthesis of 3,4-disubstituted isocoumarins through the Pd-catalyzed annulation of 2-iodoaromatic acids with ynamides. *Chem. Commun.*, 2016, **52**, 6801-6804.
- 2 H. Clavier, A. Lepronier, N. Bengobesse-Mintsa, D. Gatineau, H. Pellissier, L. Giordano, A. Tenaglia and G. Buono, Palladium-mediated [2 + 1] cycloaddition of norbornene derivatives with ynamides. *Adv. Synth. Catal.*, 2013, **355**, 403-408.
- 3 Y. Zhang, R. P. Hsung, M. R. Tracey, K. C. M. Kurtz and E. L. Vera, Copper sulfate-pentahydrate-1,10-phenanthroline catalyzed amidations of alkynyl bromides. Synthesis of heteroaromatic amine substituted ynamides. *Org. Lett.*, 2004, **6**, 1151-1154.
- 4 X.-N. Wang, Y. Liu, X. Shen, N. Wang, X. Liu, R. Chen and J. Chang, TMSOTf/TfOH-Promoted [4 + 2] annulation of ynamides with 2-aminoarylnitriles to construct 2,4-diaminoquinolines. *J. Org. Chem.*, 2025, **90**, 3930-3935.
- 5 A. Hentz, P. Retailleau, V. Gandon, K. Cariou and R. H. Dodd, Transition-metal-free tunable chemoselective N functionalization of indoles with ynamides. *Angew. Chem. Int. Ed.*, 2014, **53**, 8333-8337.
- 6 E. G. L. Robert and J. Waser, Ficini reaction with acrylates for the stereoselective synthesis of aminocyclobutanes. *Chem. Eur. J.*, 2024, **30**, e202401810.
- 7 L. Ding, Z. Zhu, X. Zhou, G. Zhu, J.-H. Wang, S.-T. Zhu, B. Hu, X.-N. Wang and J. Chang, Metal-free [2 + 2] and [4 + 2] cycloadditions of *N*-aryl-substituted ynamides to construct functionalized aminocyclobutenes and 4-aminoquinolines. *Org. Chem. Front.*, 2023, **10**, 4043-4054.

- 8 M. Tayu, R. Watanabe, S. Isogi and N. Saito, A catalytic construction of indoles via formation of ruthenium vinylidene species from *N*-arylnamides. *Adv. Synth. Catal.*, 2021, **363**, 1147-1151.
- 9 B. Yao, Z. Liang, T. Niu and Y. Zhang, Iron-catalyzed amidation of alkynyl bromides: a facile route for the preparation of ynamides. *J. Org. Chem.*, 2009, **74**, 4630-4633.
- 10 X. Zhang, Y. Zhang, J. Huang, R. P. Hsung, K. C. M. Kurtz, J. Oppenheimer, M. E. Petersen, I. K. Sagamanova, L. Shen and M. R. Tracey, Copper(II)-Catalyzed Amidations of Alkynyl Bromides as a General Synthesis of Ynamides and *Z*-Enamides. An Intramolecular Amidation for the Synthesis of Macrocyclic Ynamides. *J. Org. Chem.*, 2006, **71**, 4170-4177.
- 11 J. Zhang, M. Guo, Y. Chen, S. Zhang, X.-N. Wang and J. Chang, Synthesis of amino-substituted  $\alpha$ - and  $\delta$ -carbolines via metal-free [2 + 2 + 2] cycloaddition of functionalized alkyne-nitriles with ynamides. *Org. Lett.*, 2019, **21**, 1331-1336.
- 12 Y. Tu, X. Zeng, H. Wang and J. Zhao, A robust one-step approach to ynamides. *Org. Lett.*, 2018, **20**, 280-283.
- 13 M. Egi, K. Shimizu, M. Kamiya, Y. Ota and S. Akai, Central-axial-central chirality transfer: asymmetric synthesis of highly substituted indenenes bearing a stereogenic quaternary carbon center from optically active propargyl alcohols. *Chem. Commun.*, 2015, **51**, 380-383.
- 14 H. Li and R. P. Hsung, Highly substituted 2-amido-furans from Rh(II)-catalyzed cyclopropanations of ynamides. *Org. Lett.*, 2009, **11**, 4462-4465.
- 15 Gayyur, S. Choudhary, R. Kant and N. Ghosh, Synergetic copper/zinc catalysis: synthesis of aryl/heteroaryl-fused 1*H*-pyrrolo[3,2-*c*]pyridines. *Chem. Commun.*, 2022, **58**, 1974-1977.
- 16 F. Pan, C. Shu, Y.-F. Ping, Y.-F. Pan, P.-P. Ruan, Q.-R. Fei and L.-W. Ye, Synthesis of  $\alpha,\beta$ -unsaturated *N*-sulfonyl imides through zinc-catalyzed intermolecular oxidation of *N*-sulfonyl ynamides. *J. Org. Chem.*, 2015, **80**, 10009-10015.
- 17 Y. Zheng, A. Perfetto, D. Luise, I. Ciofini and L. Miesch, Direct synthesis of CF<sub>2</sub>H-substituted 2-amidofurans via copper-catalyzed addition of difluorinated diazoacetone to ynamides. *Org. Lett.*, 2021, **23**, 5528-5532.
- 18 A. Galibert-Guijarro, J. Tronc, D. Mouysset, D. Siri, S. Gastaldi, M. P. Bertrand and L. Feray, Investigation of UV light-promoted synthesis of  $\alpha$ -sulfonyl amides from *N*-sulfonyl ynamides. *J. Org. Chem.*, 2024, **89**, 9695-9699.
- 19 K. A. DeKorver, R. P. Hsung, A. G. Lohse and Y. Zhang, A divergent mechanistic course of Pd(0)-catalyzed *aza*-Claisen rearrangement and *aza*-Rautenstrauch-type cyclization of *N*-allyl ynamides. *Org. Lett.*, 2010, **12**, 1840-1843.



## Part II Copies of $^1\text{H}$ NMR, $^{13}\text{C}$ NMR, and $^{19}\text{F}$ NMR Spectra

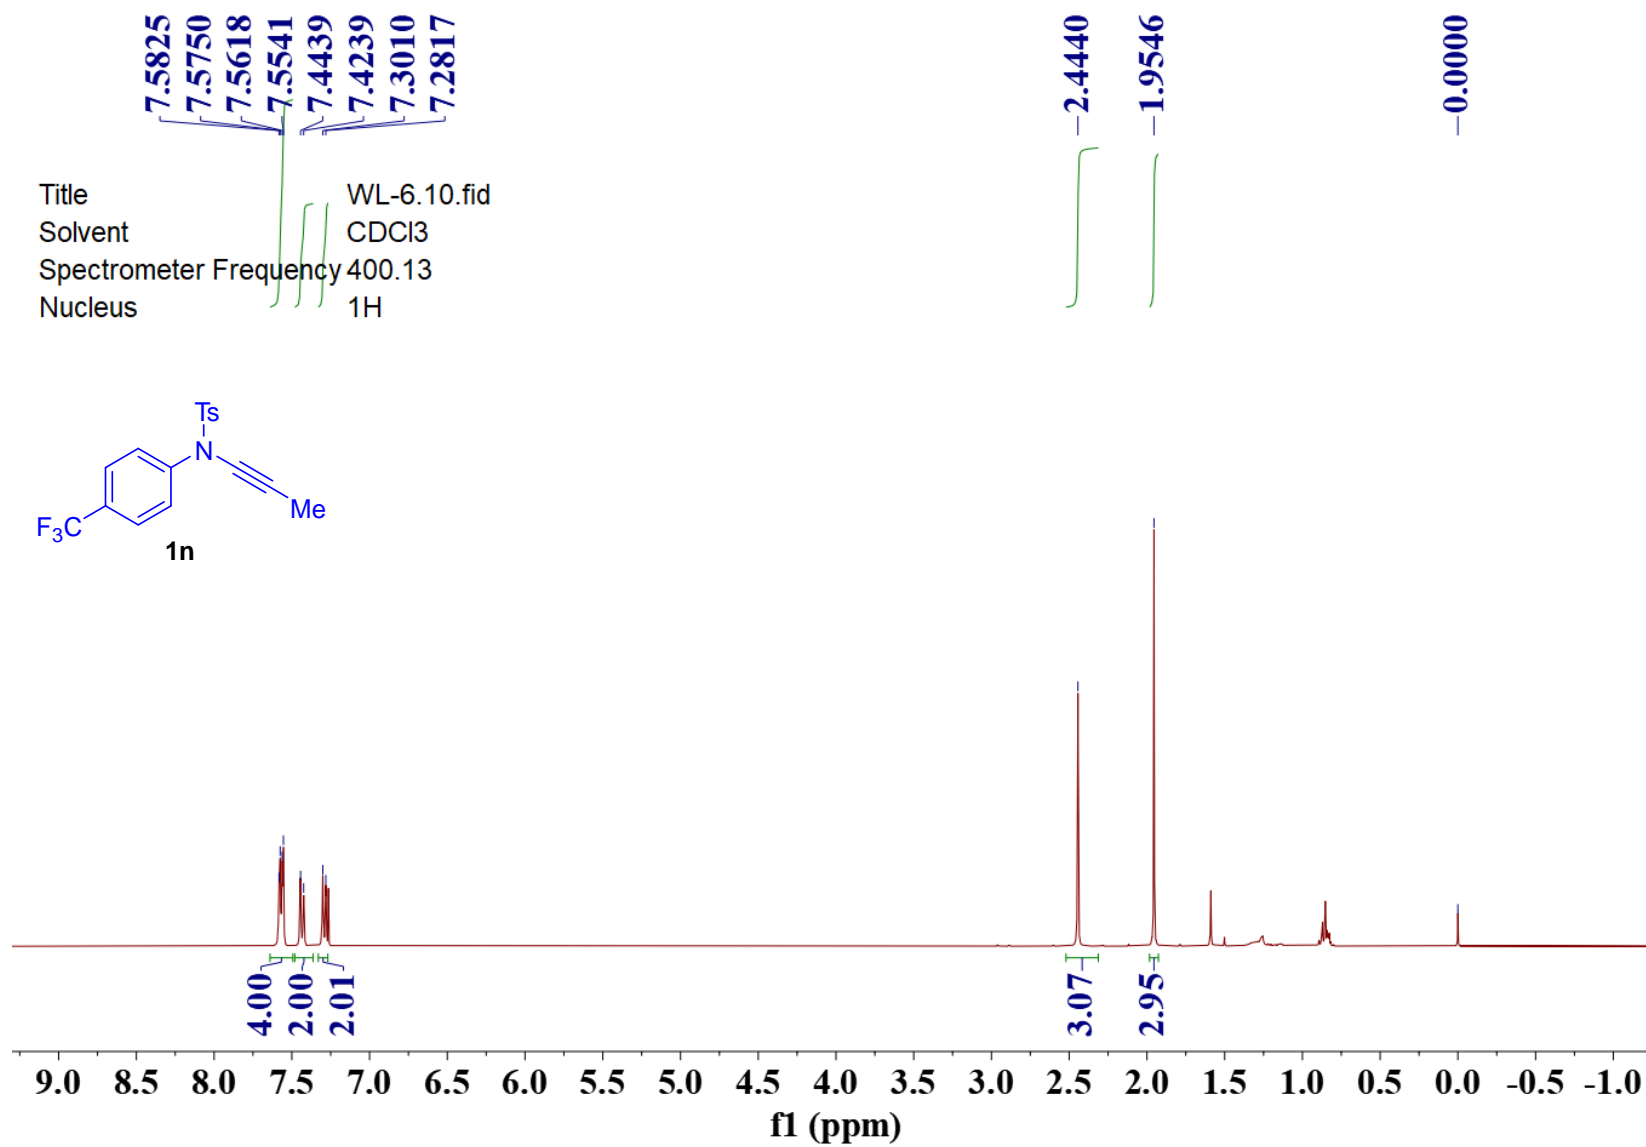

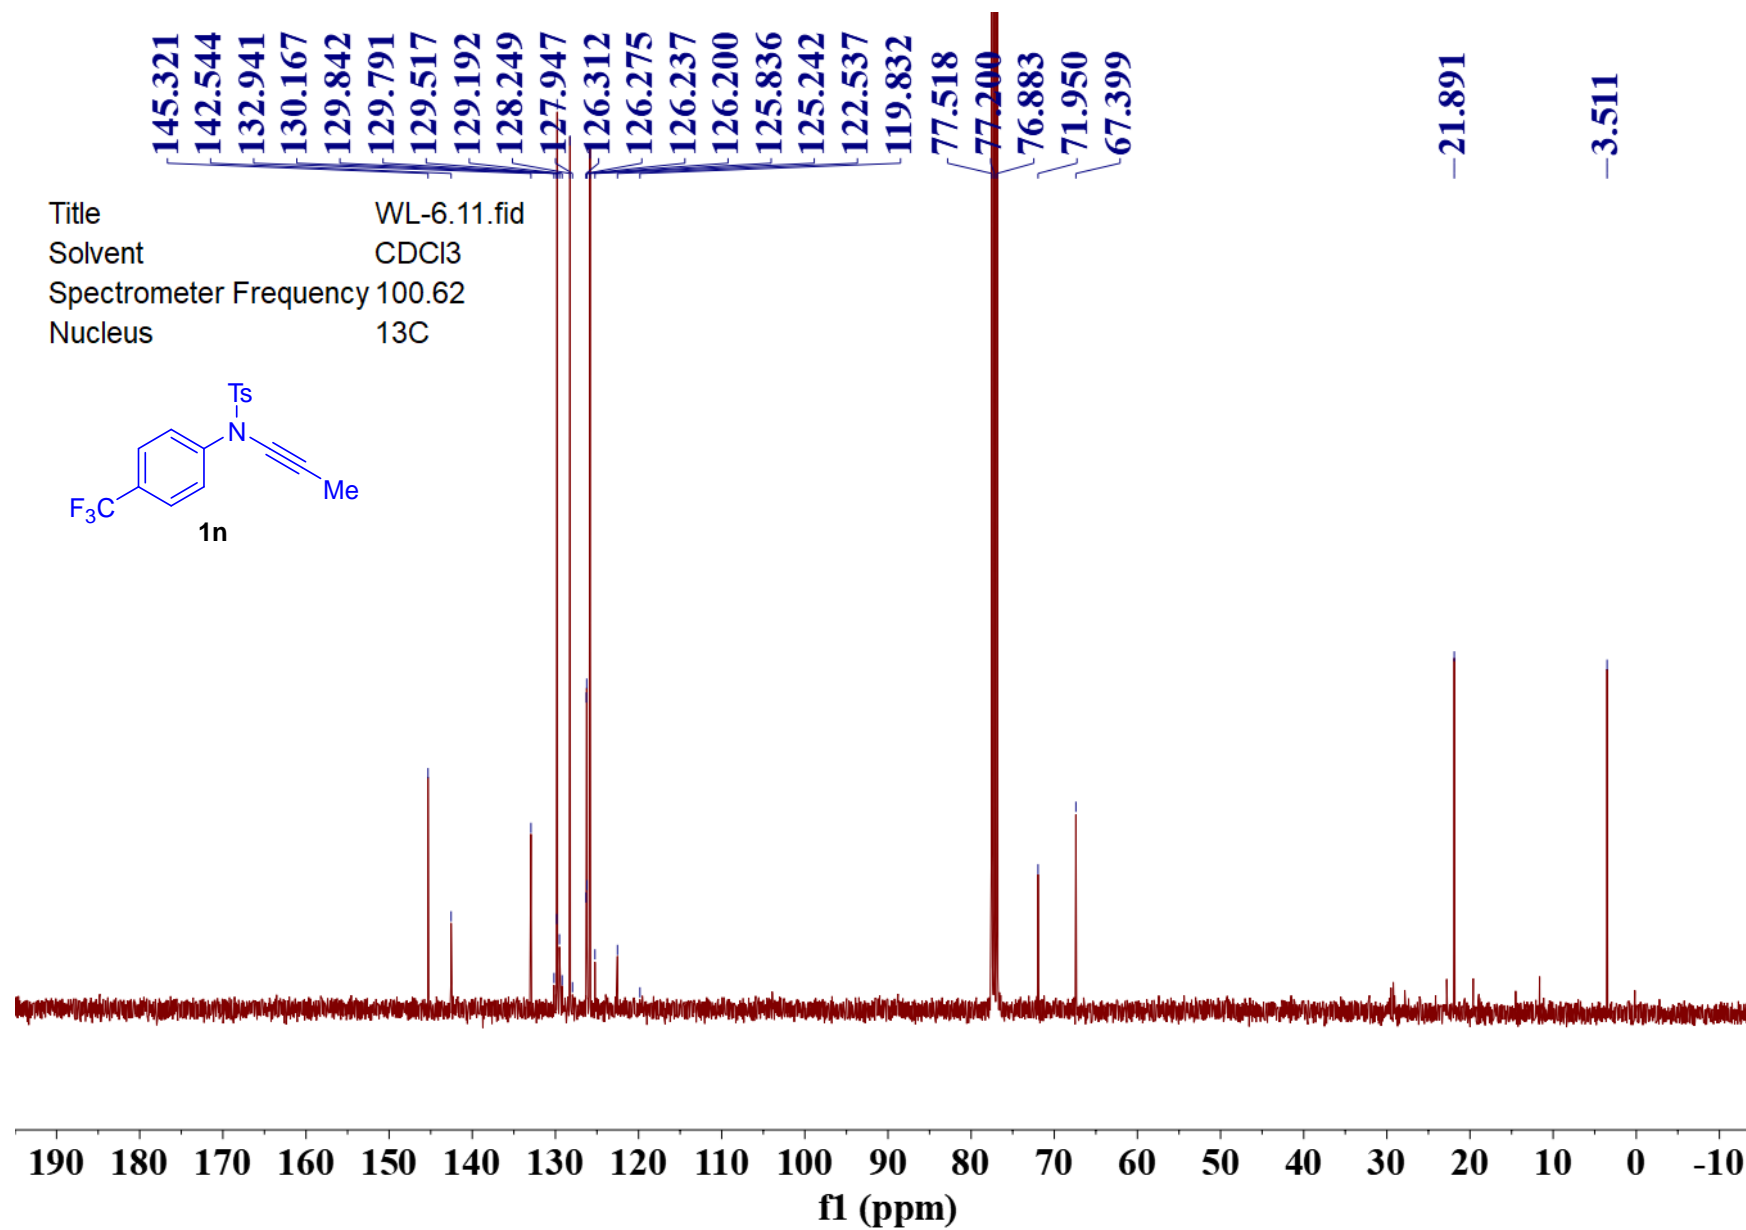

Title WL-6.12.fid  
Solvent CDCl<sub>3</sub>  
Spectrometer Frequency 376.46  
Nucleus <sup>19</sup>F

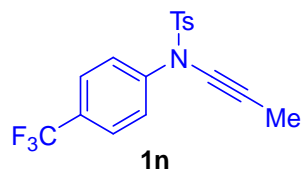

--62.4739

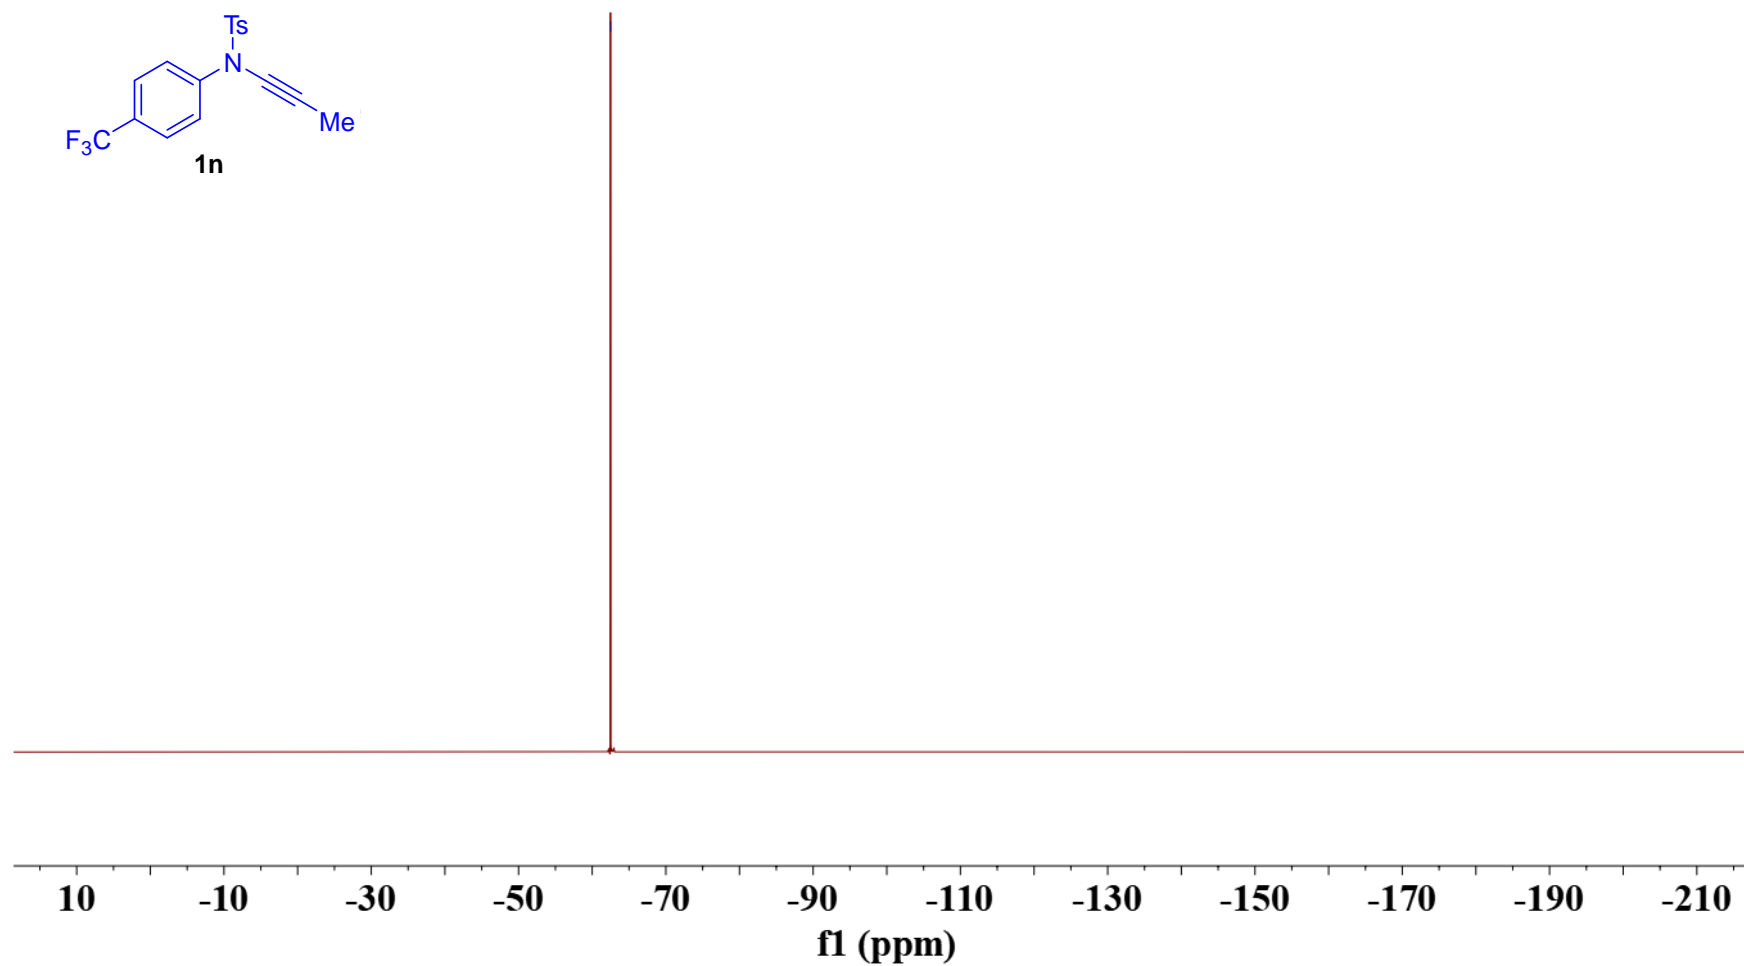

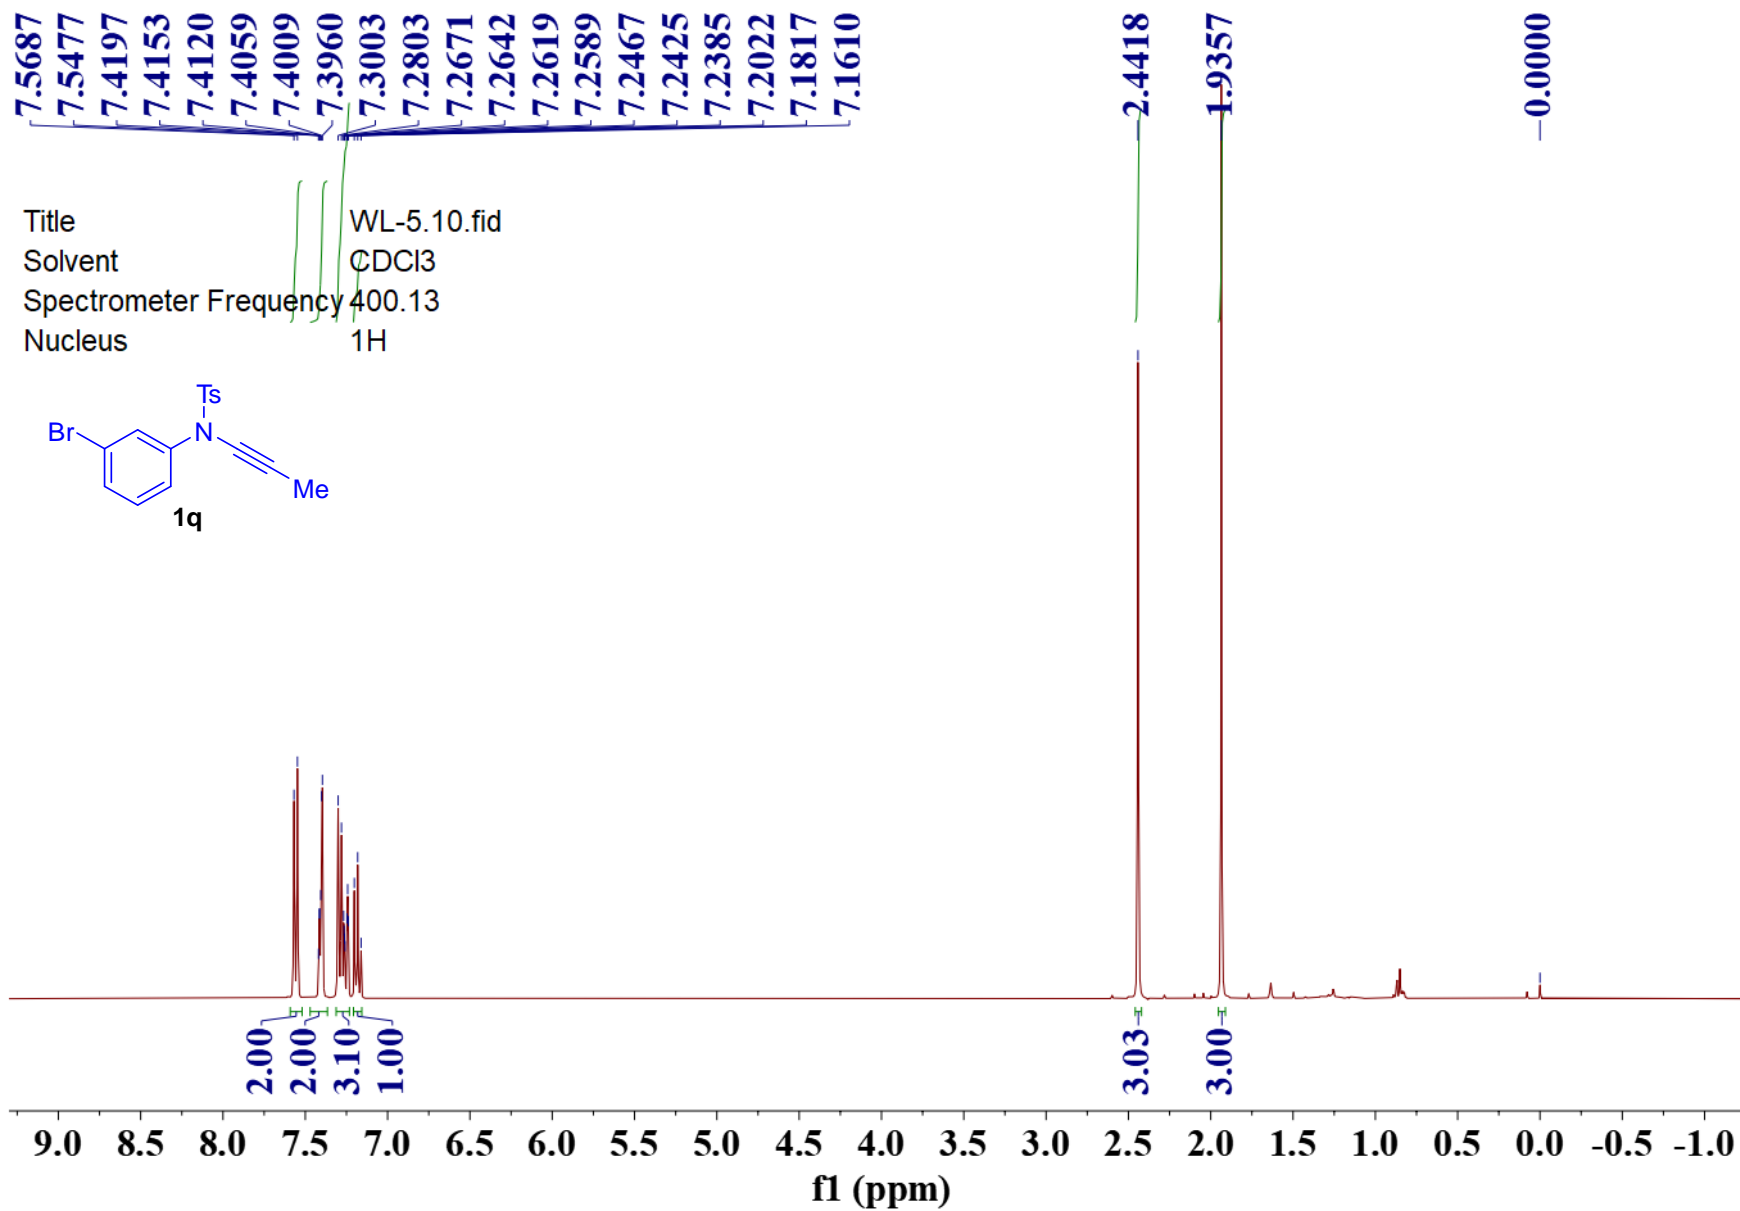

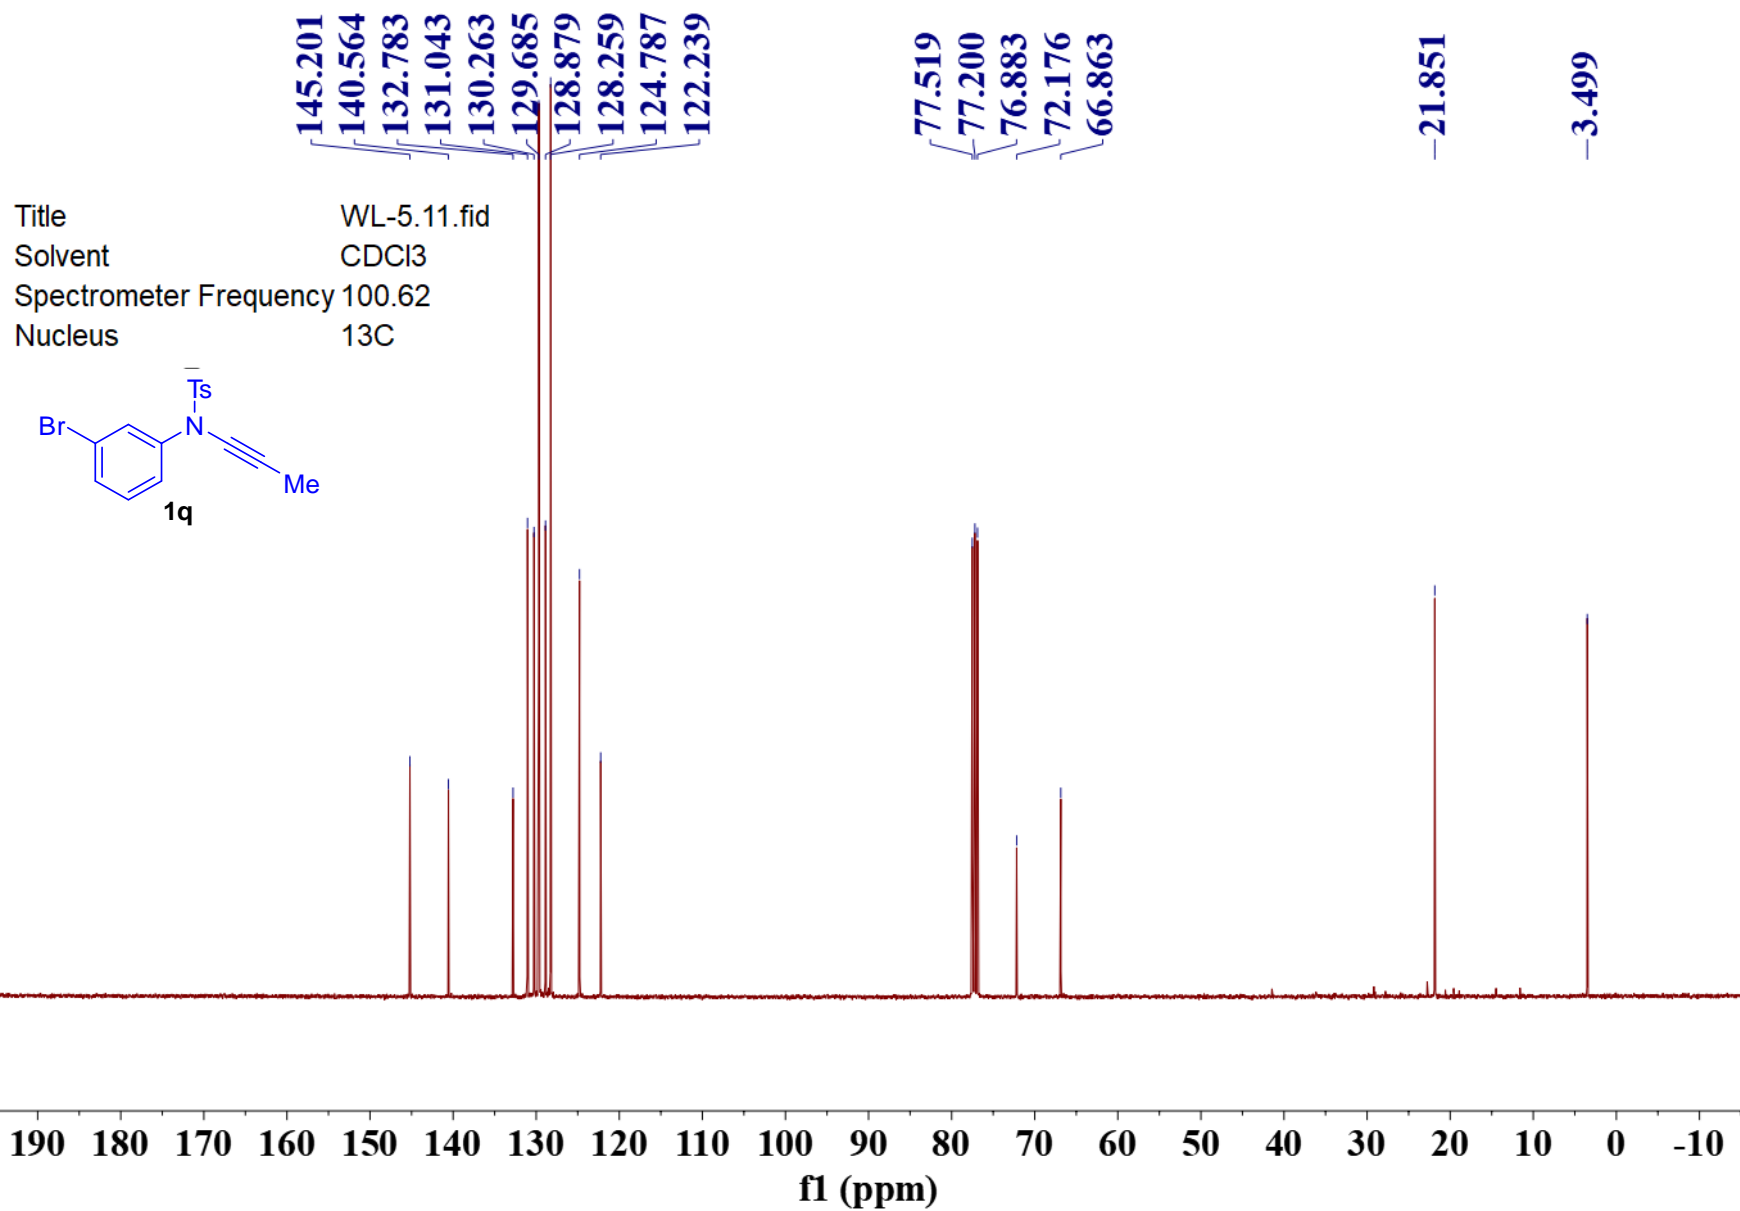

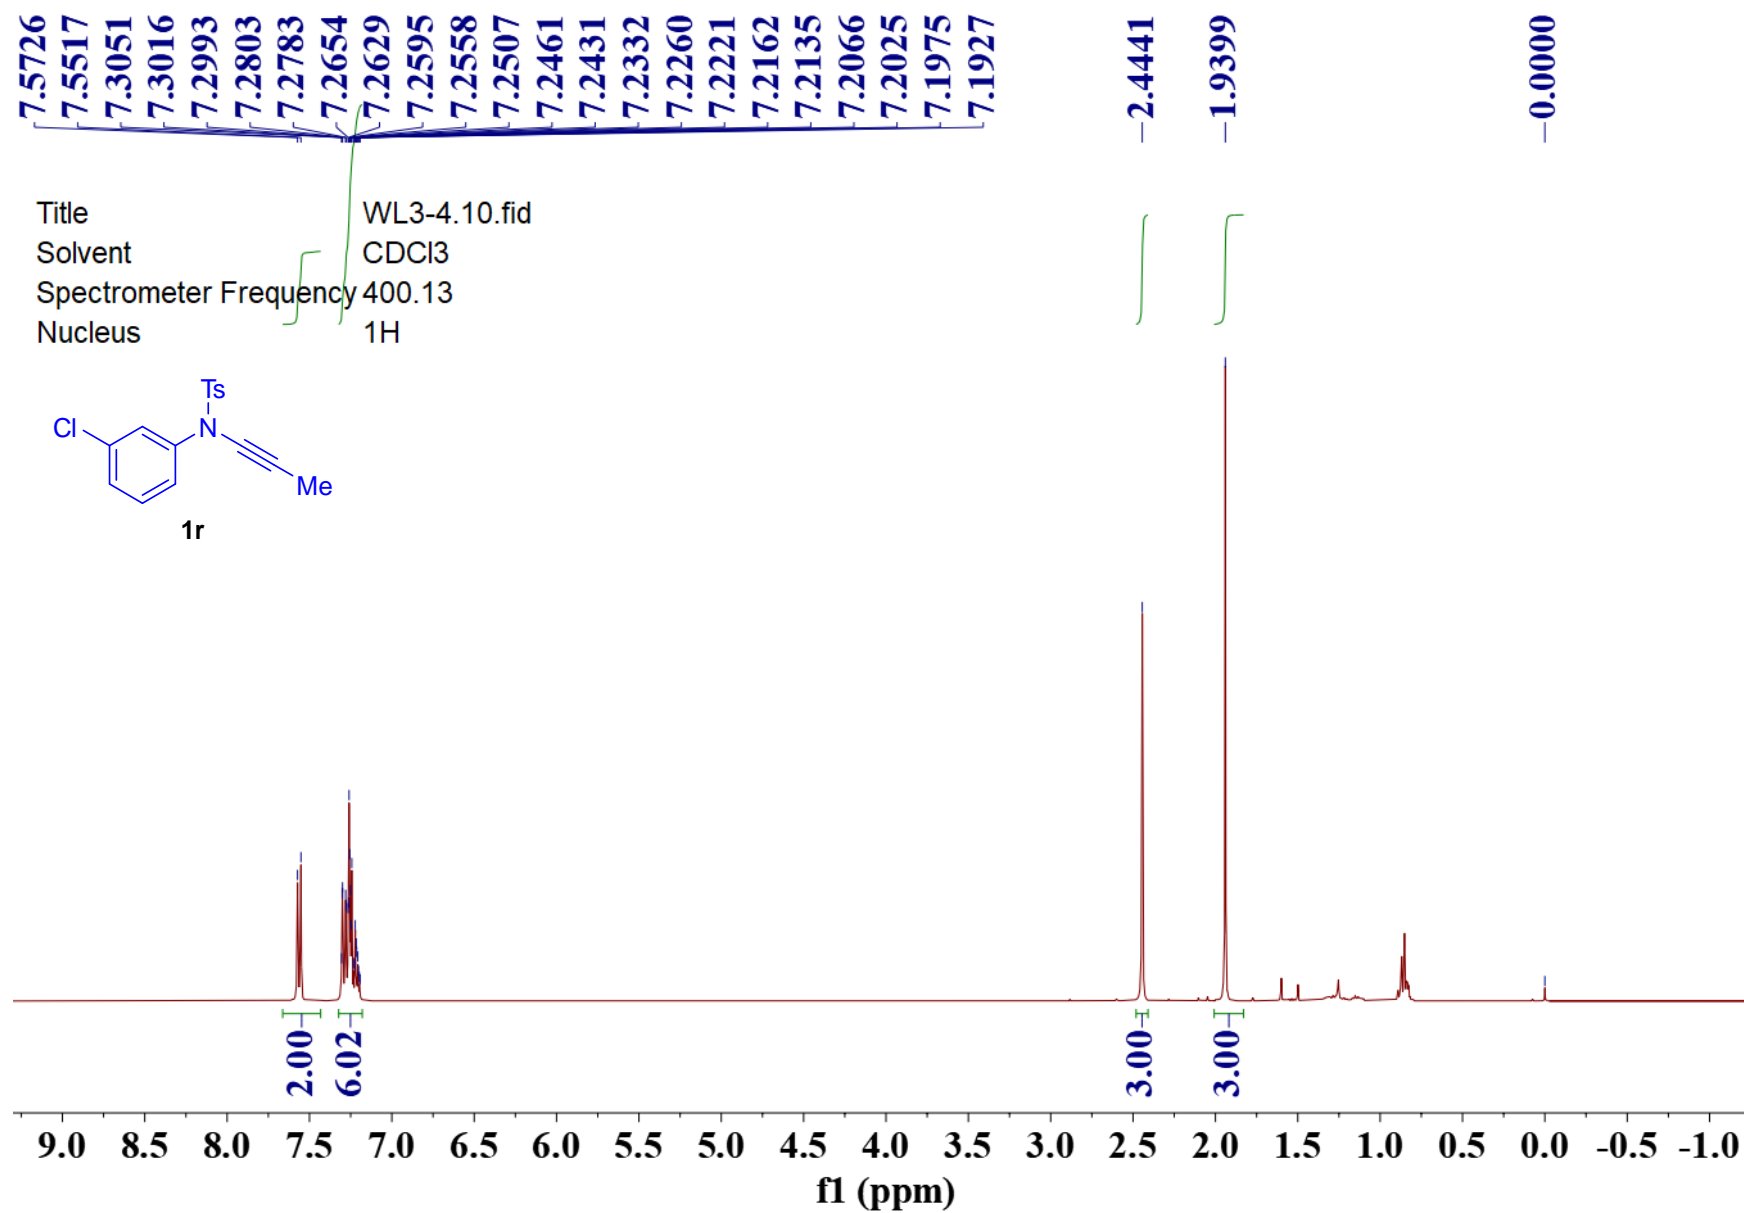

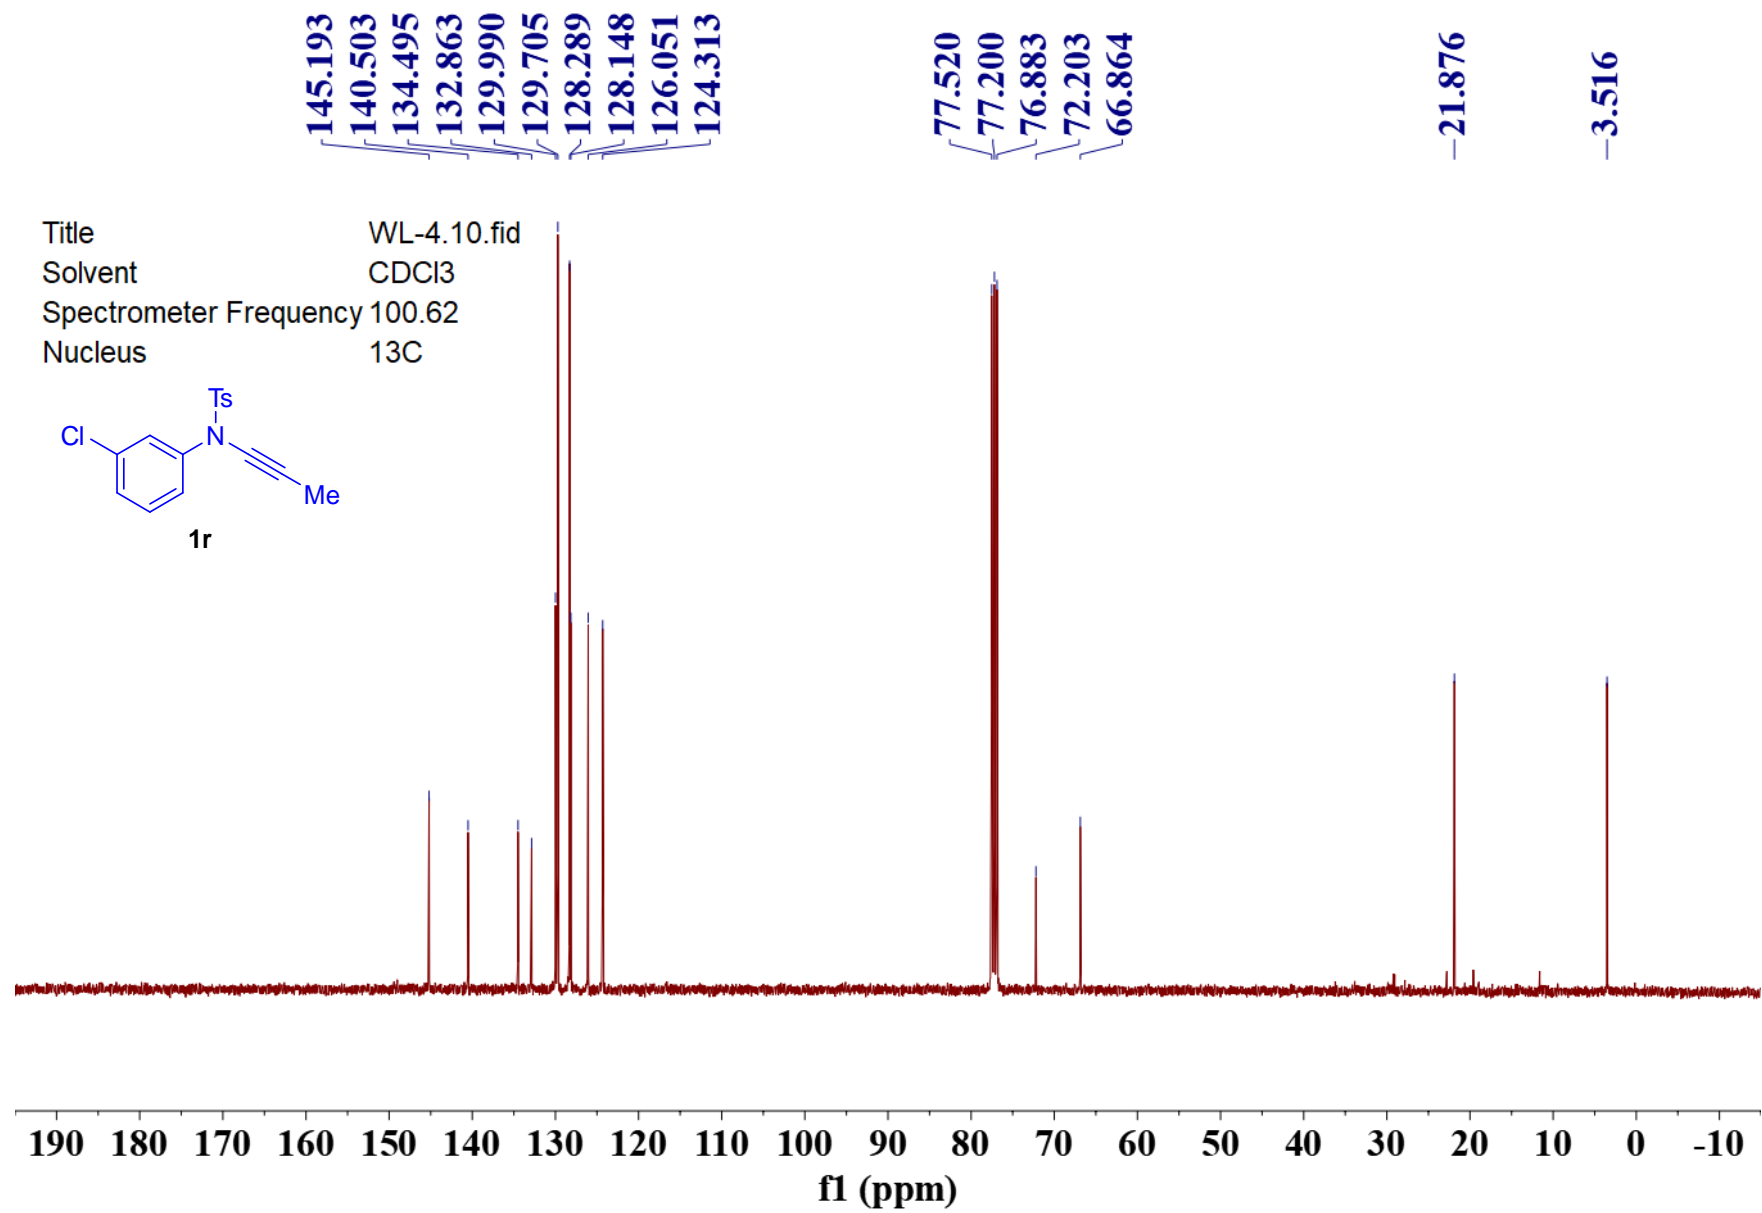



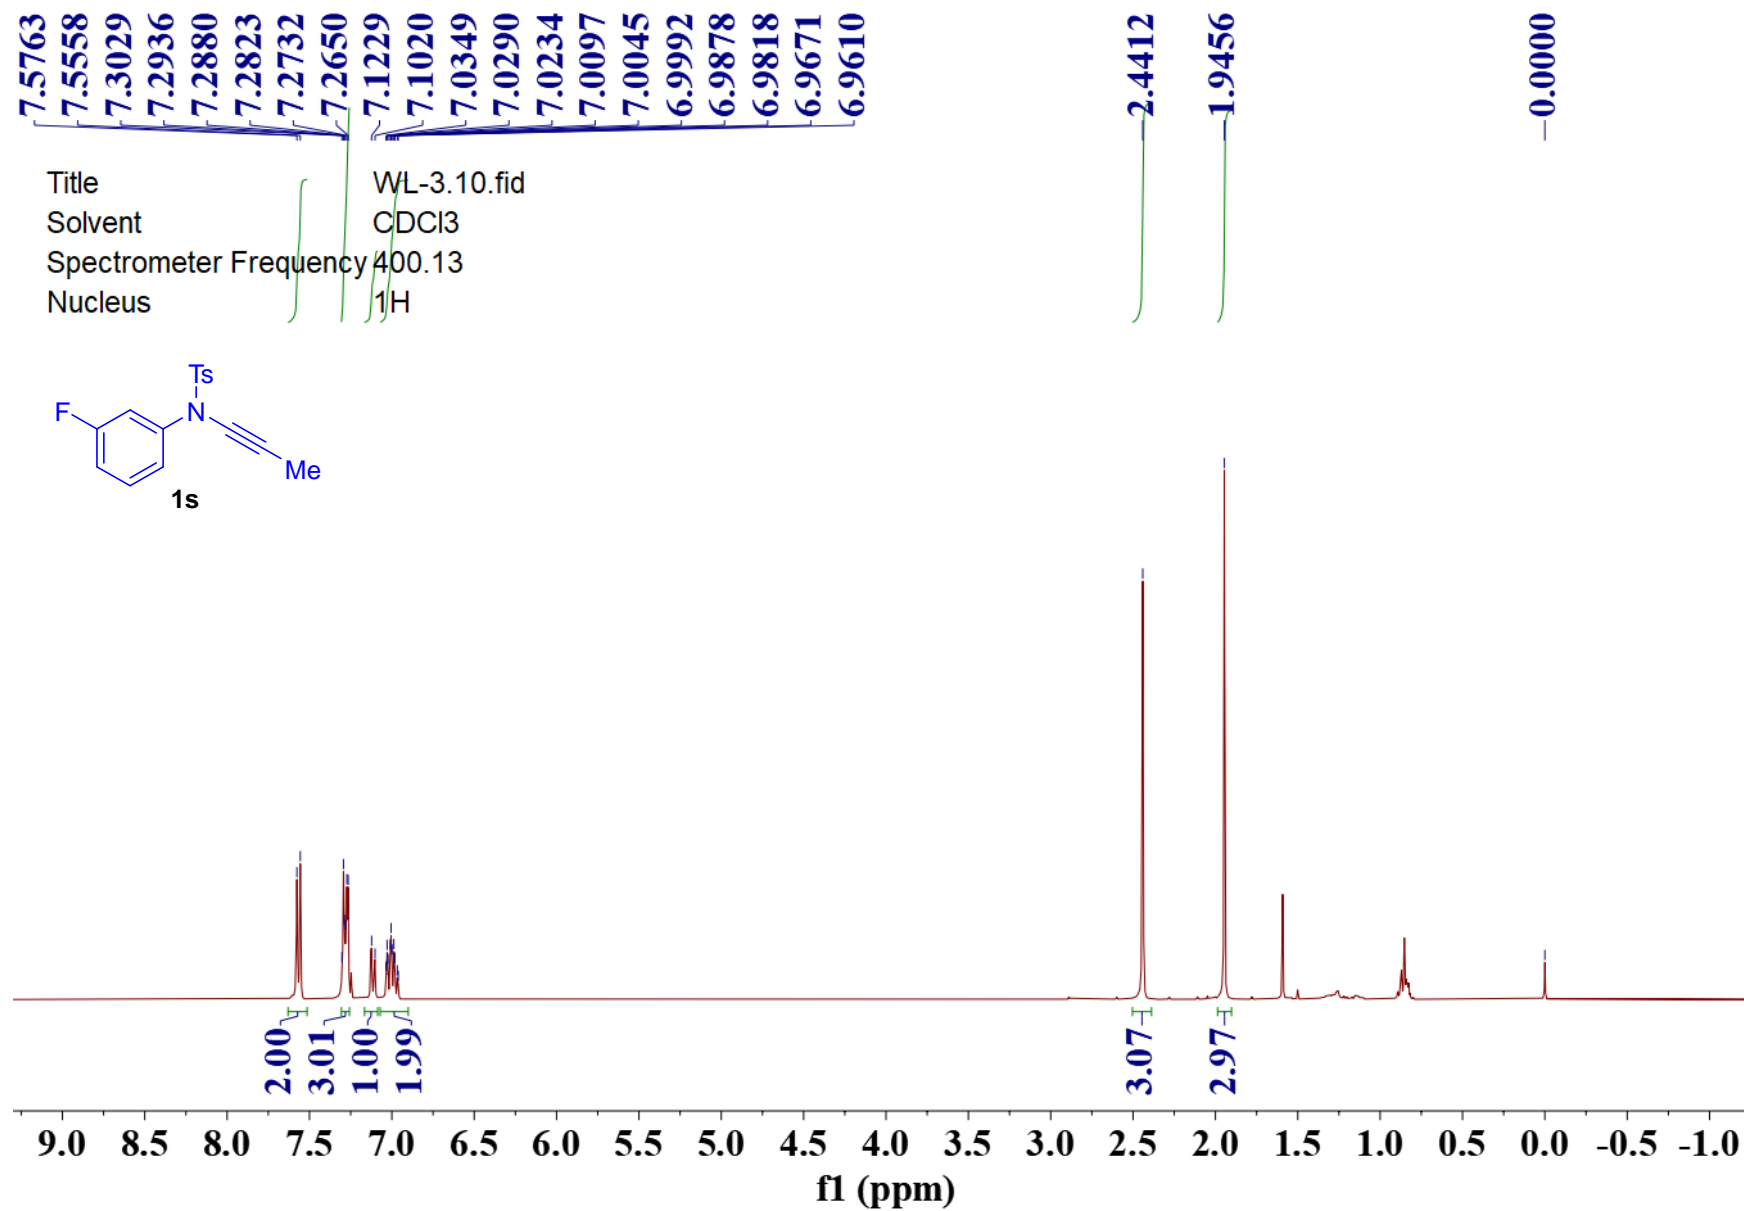

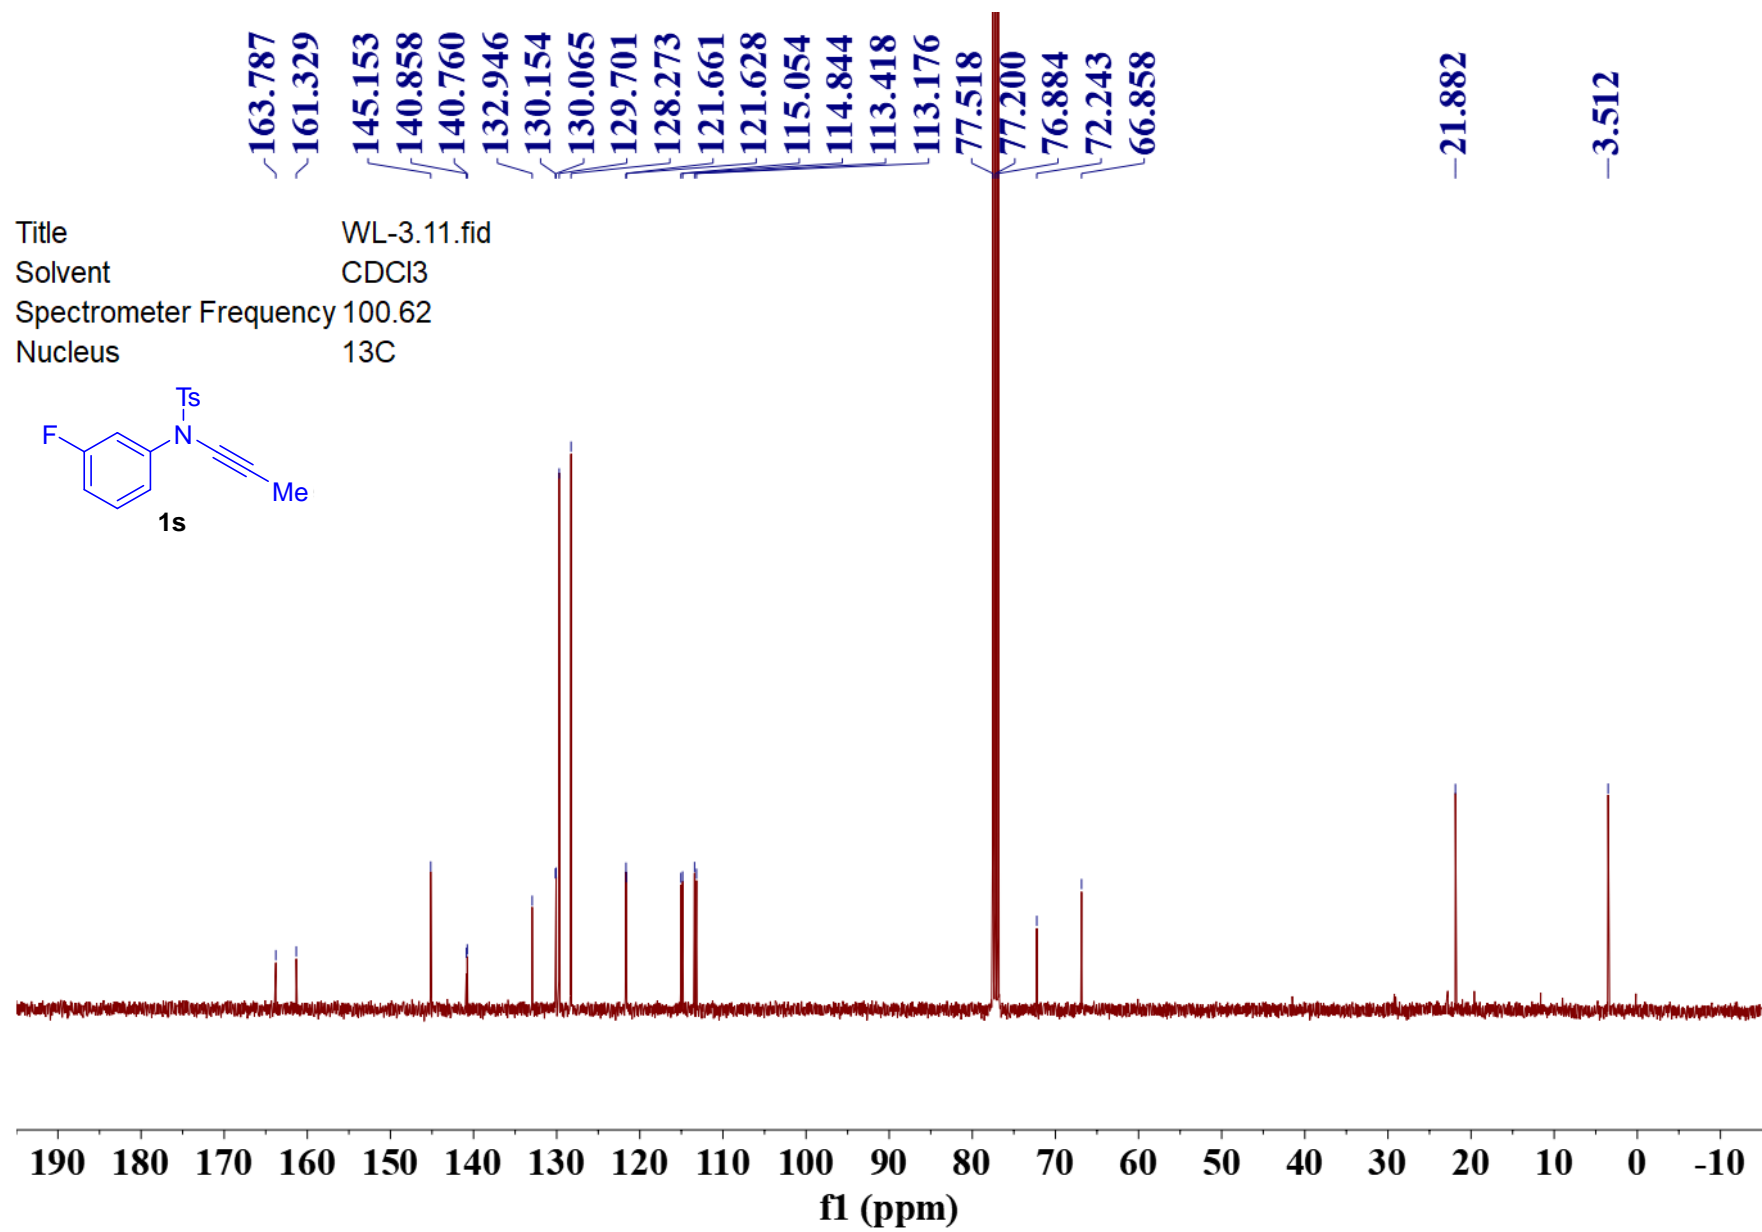

Title WL-3.12.fid  
Solvent CDCl3  
Spectrometer Frequency 376.46  
Nucleus 19F

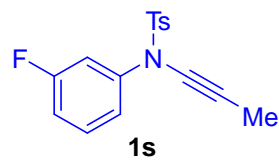

-111.2203

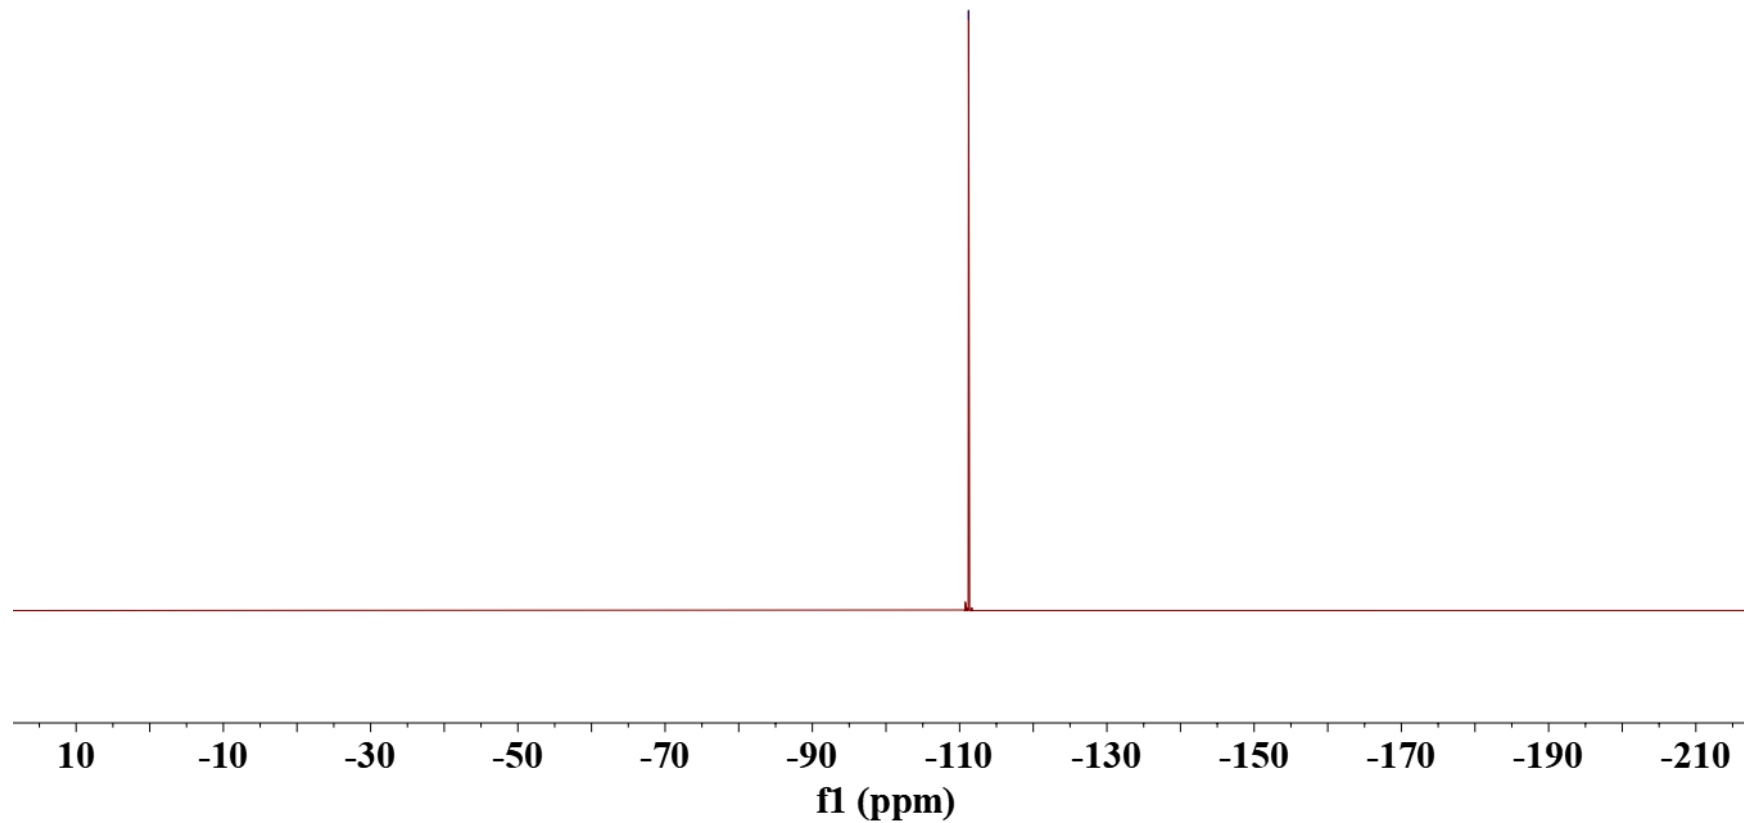

S66

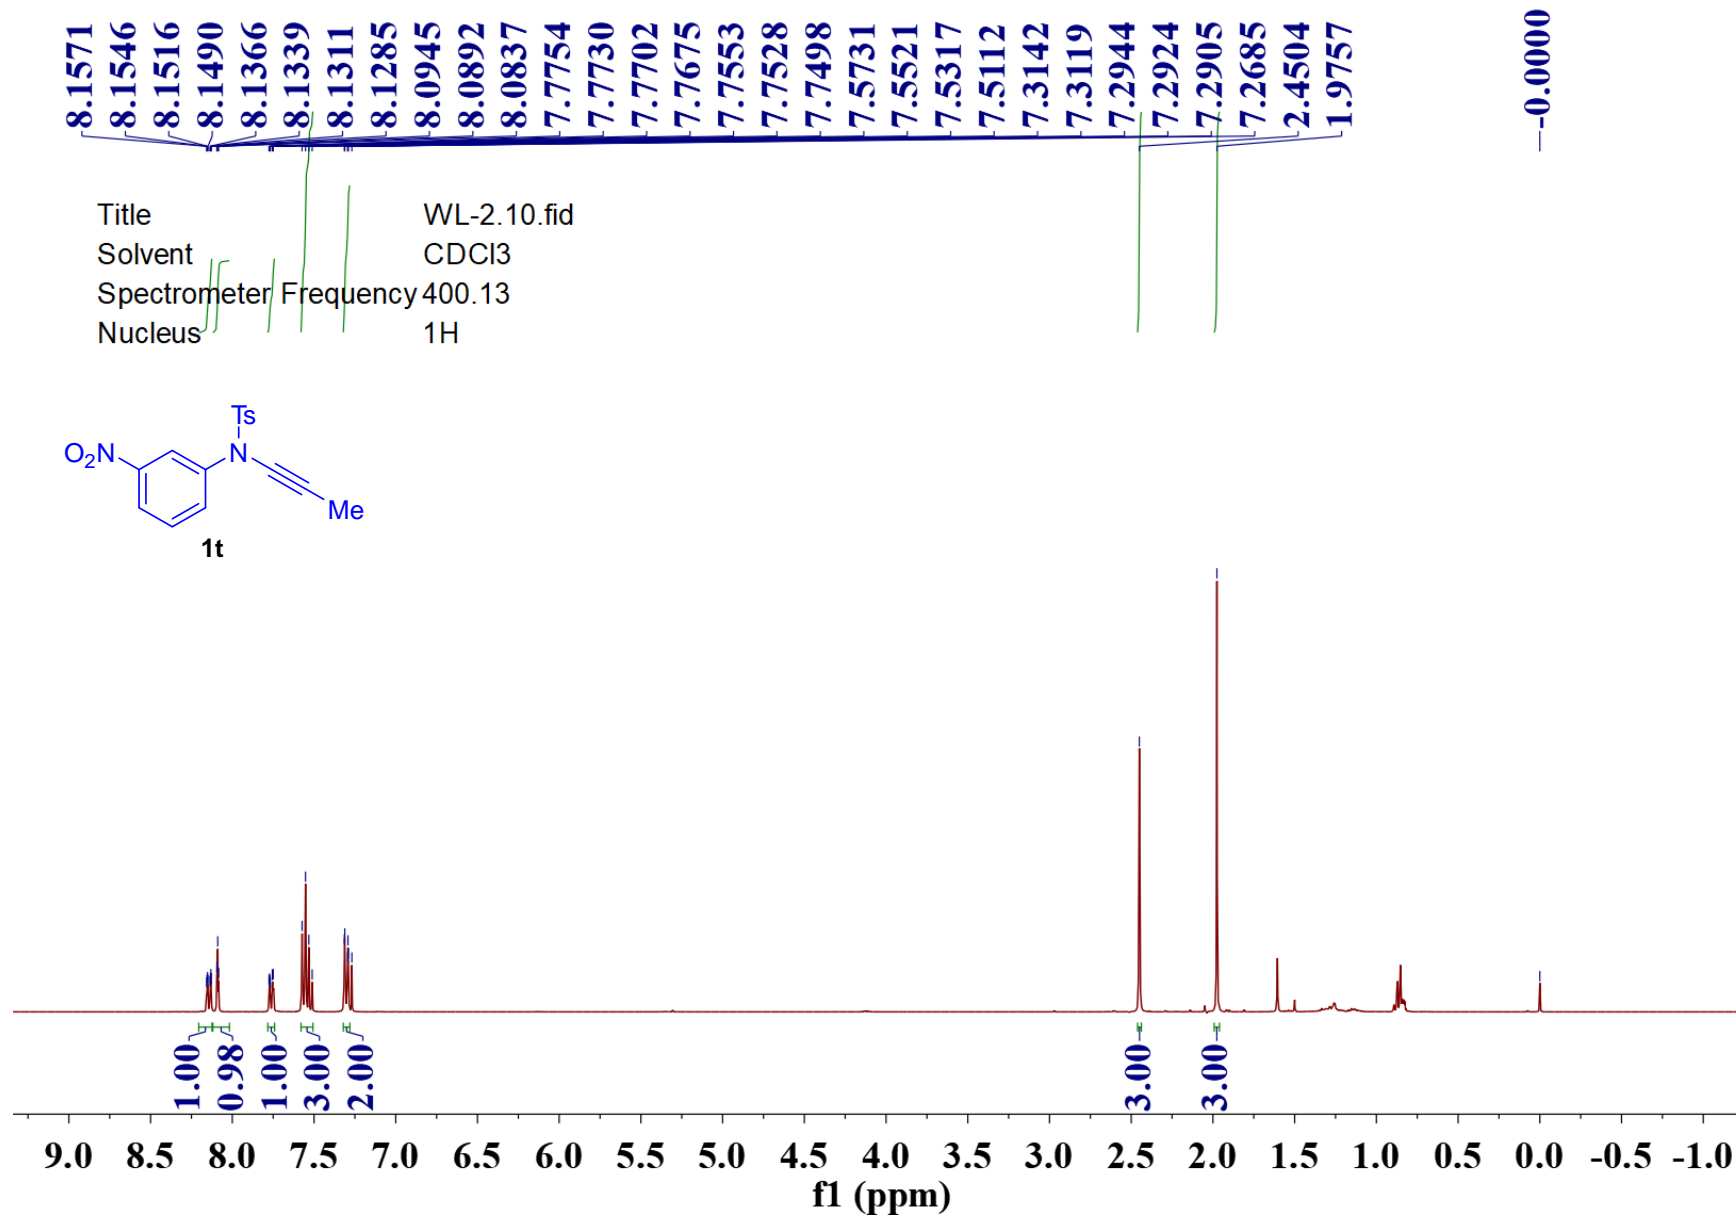

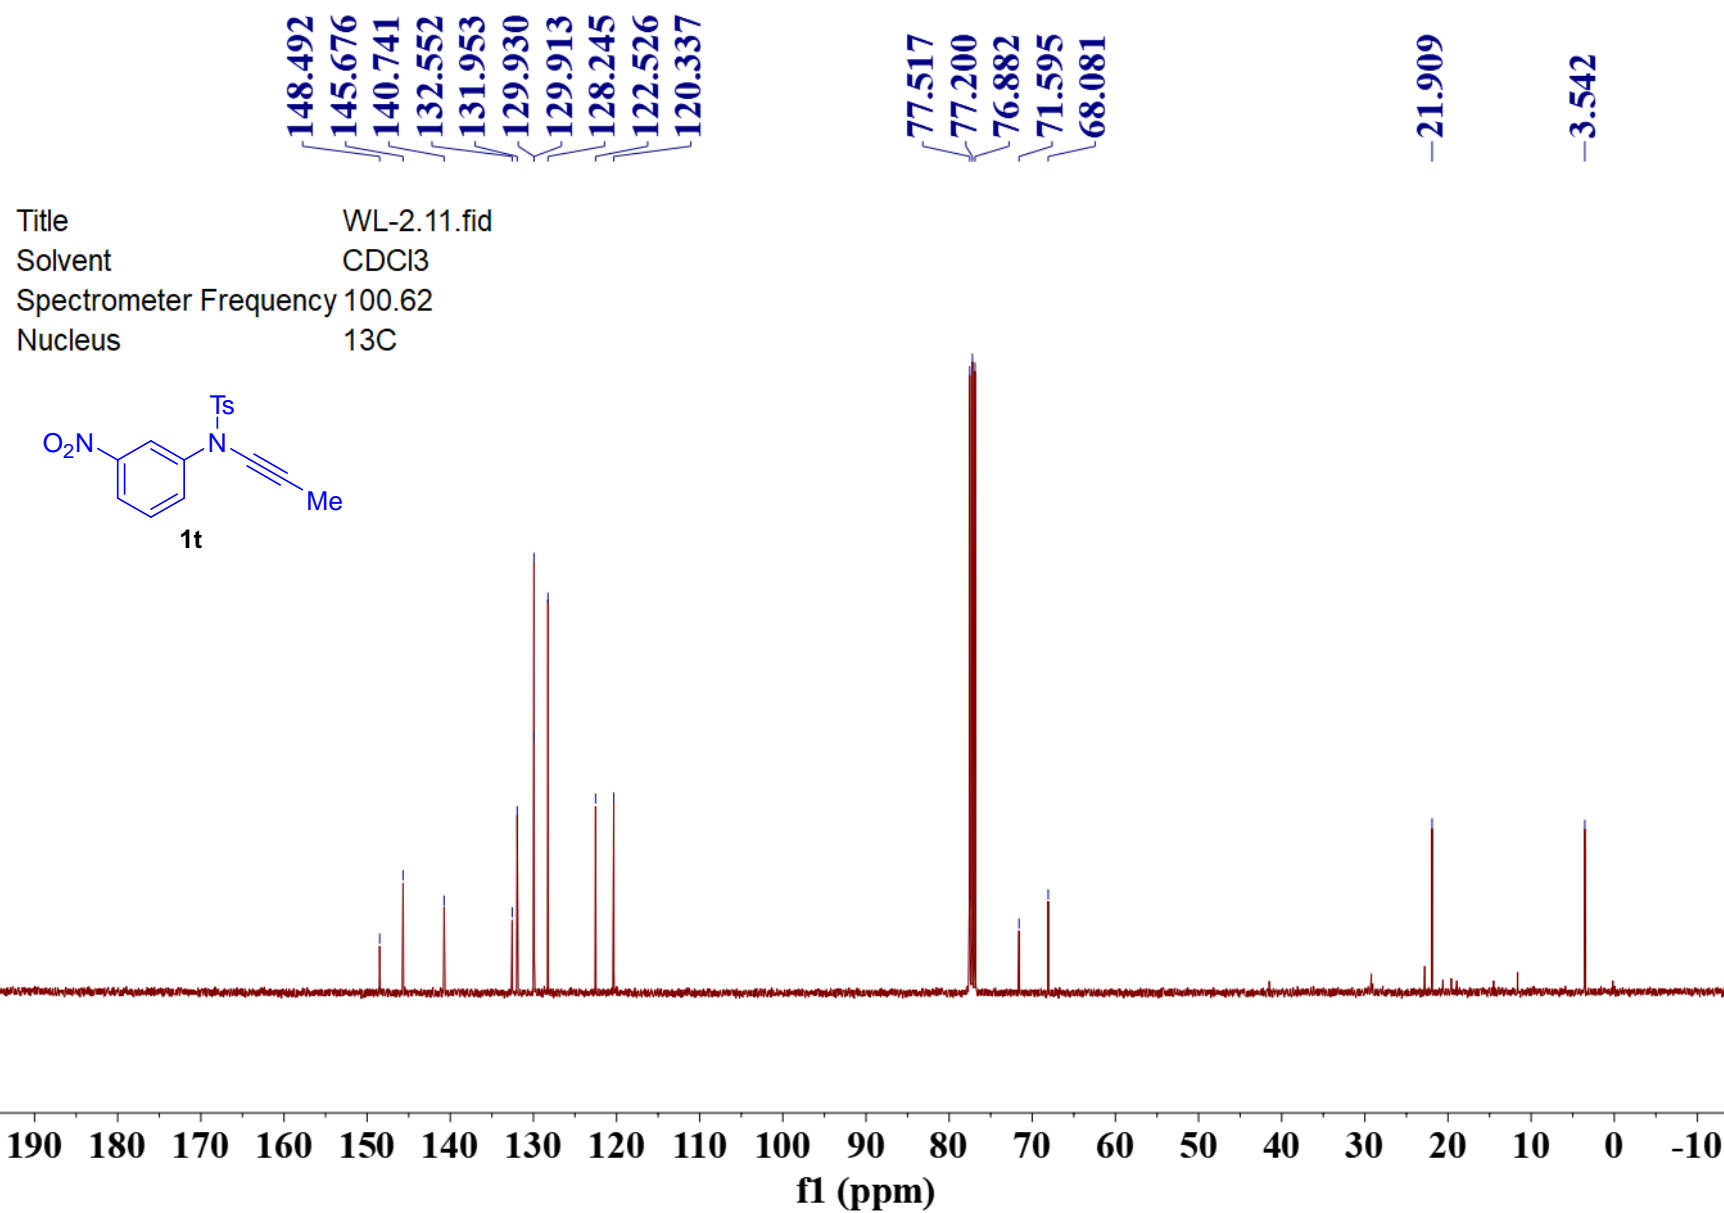

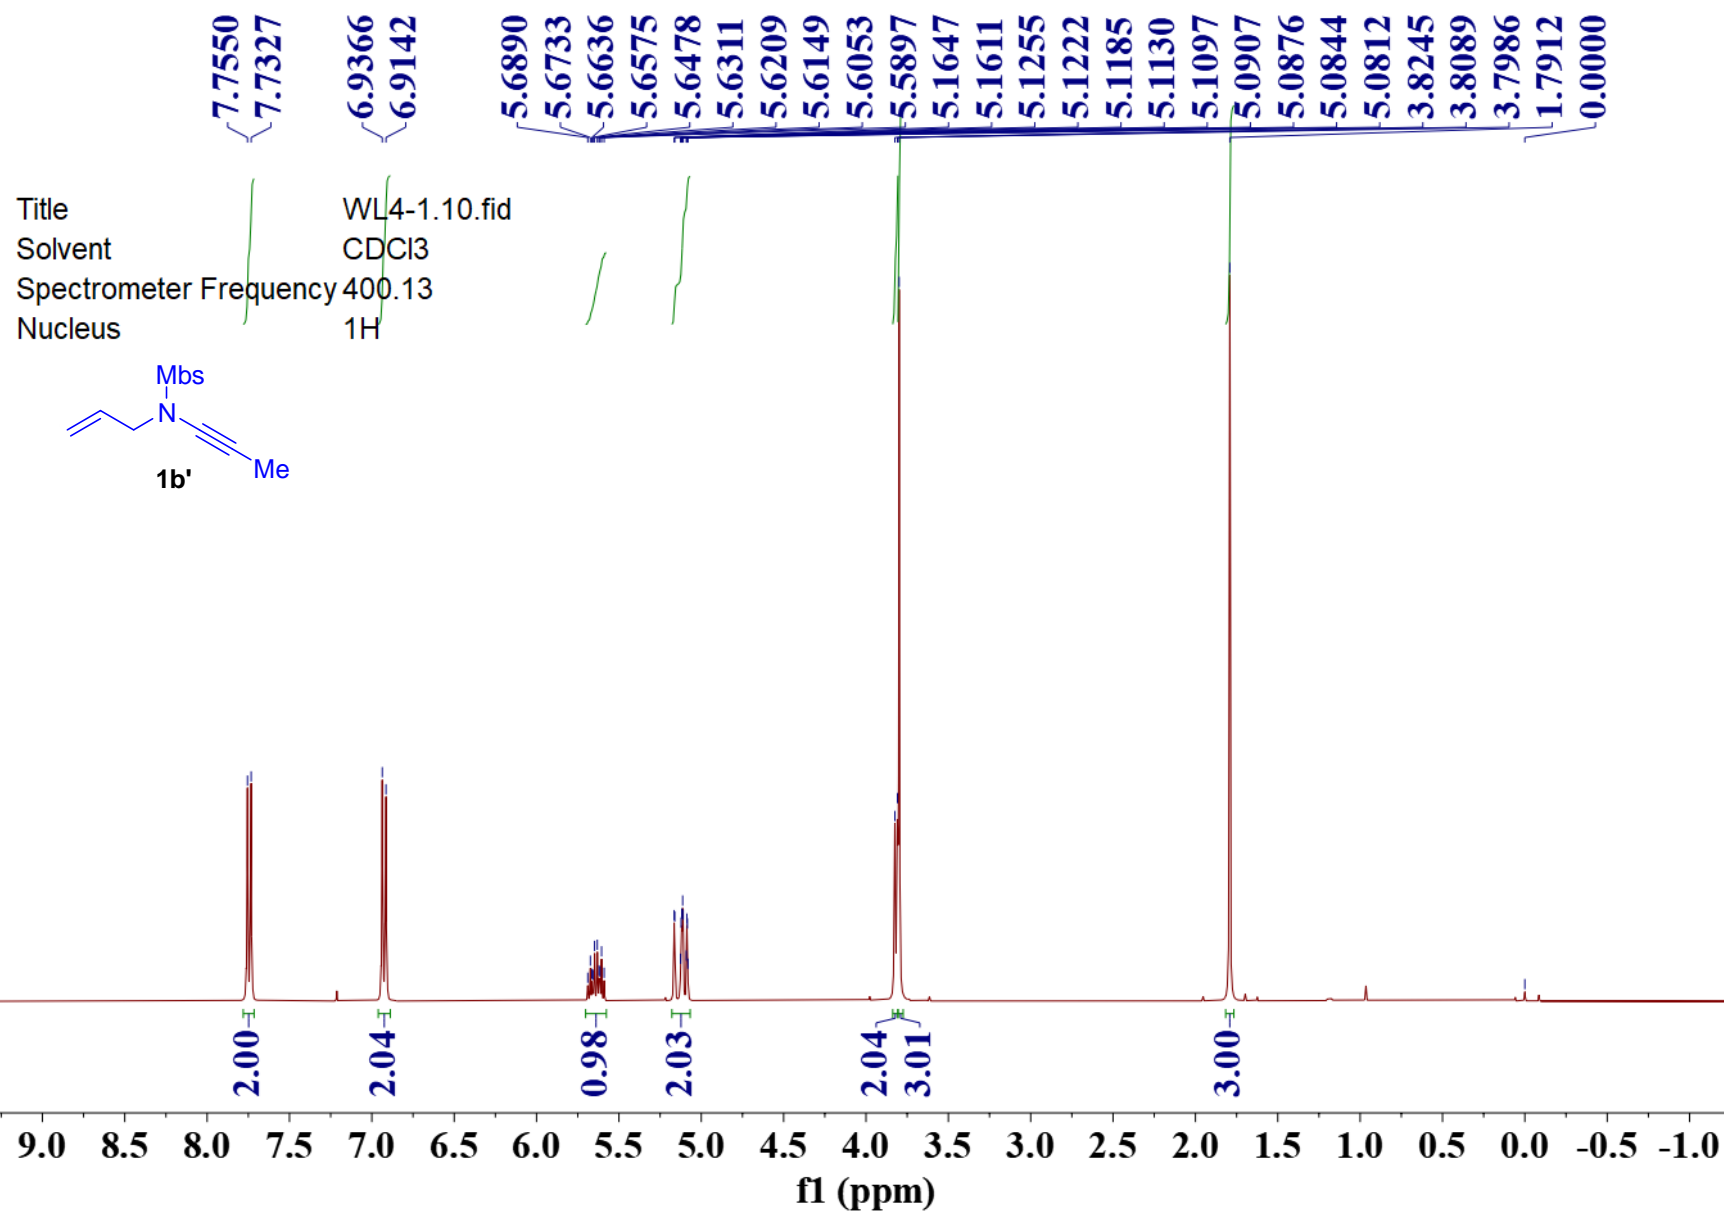

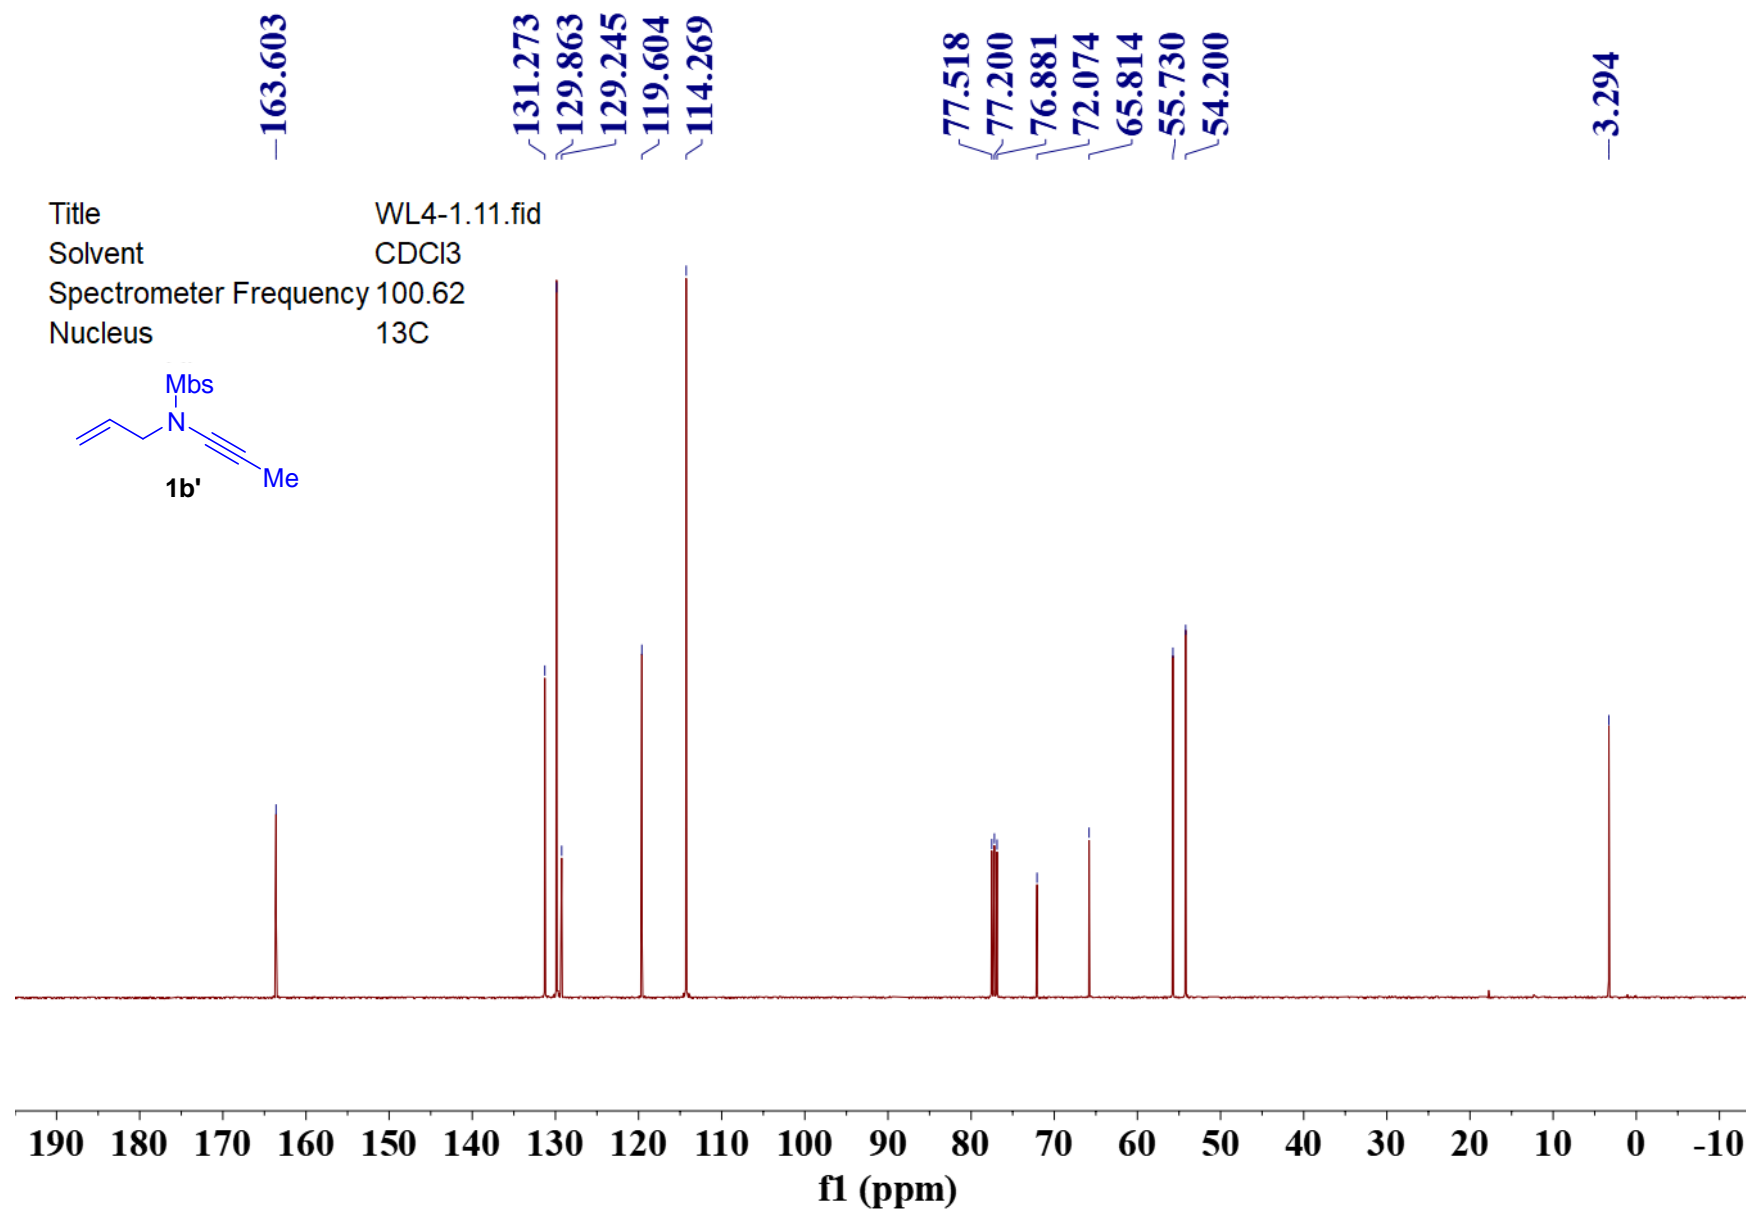



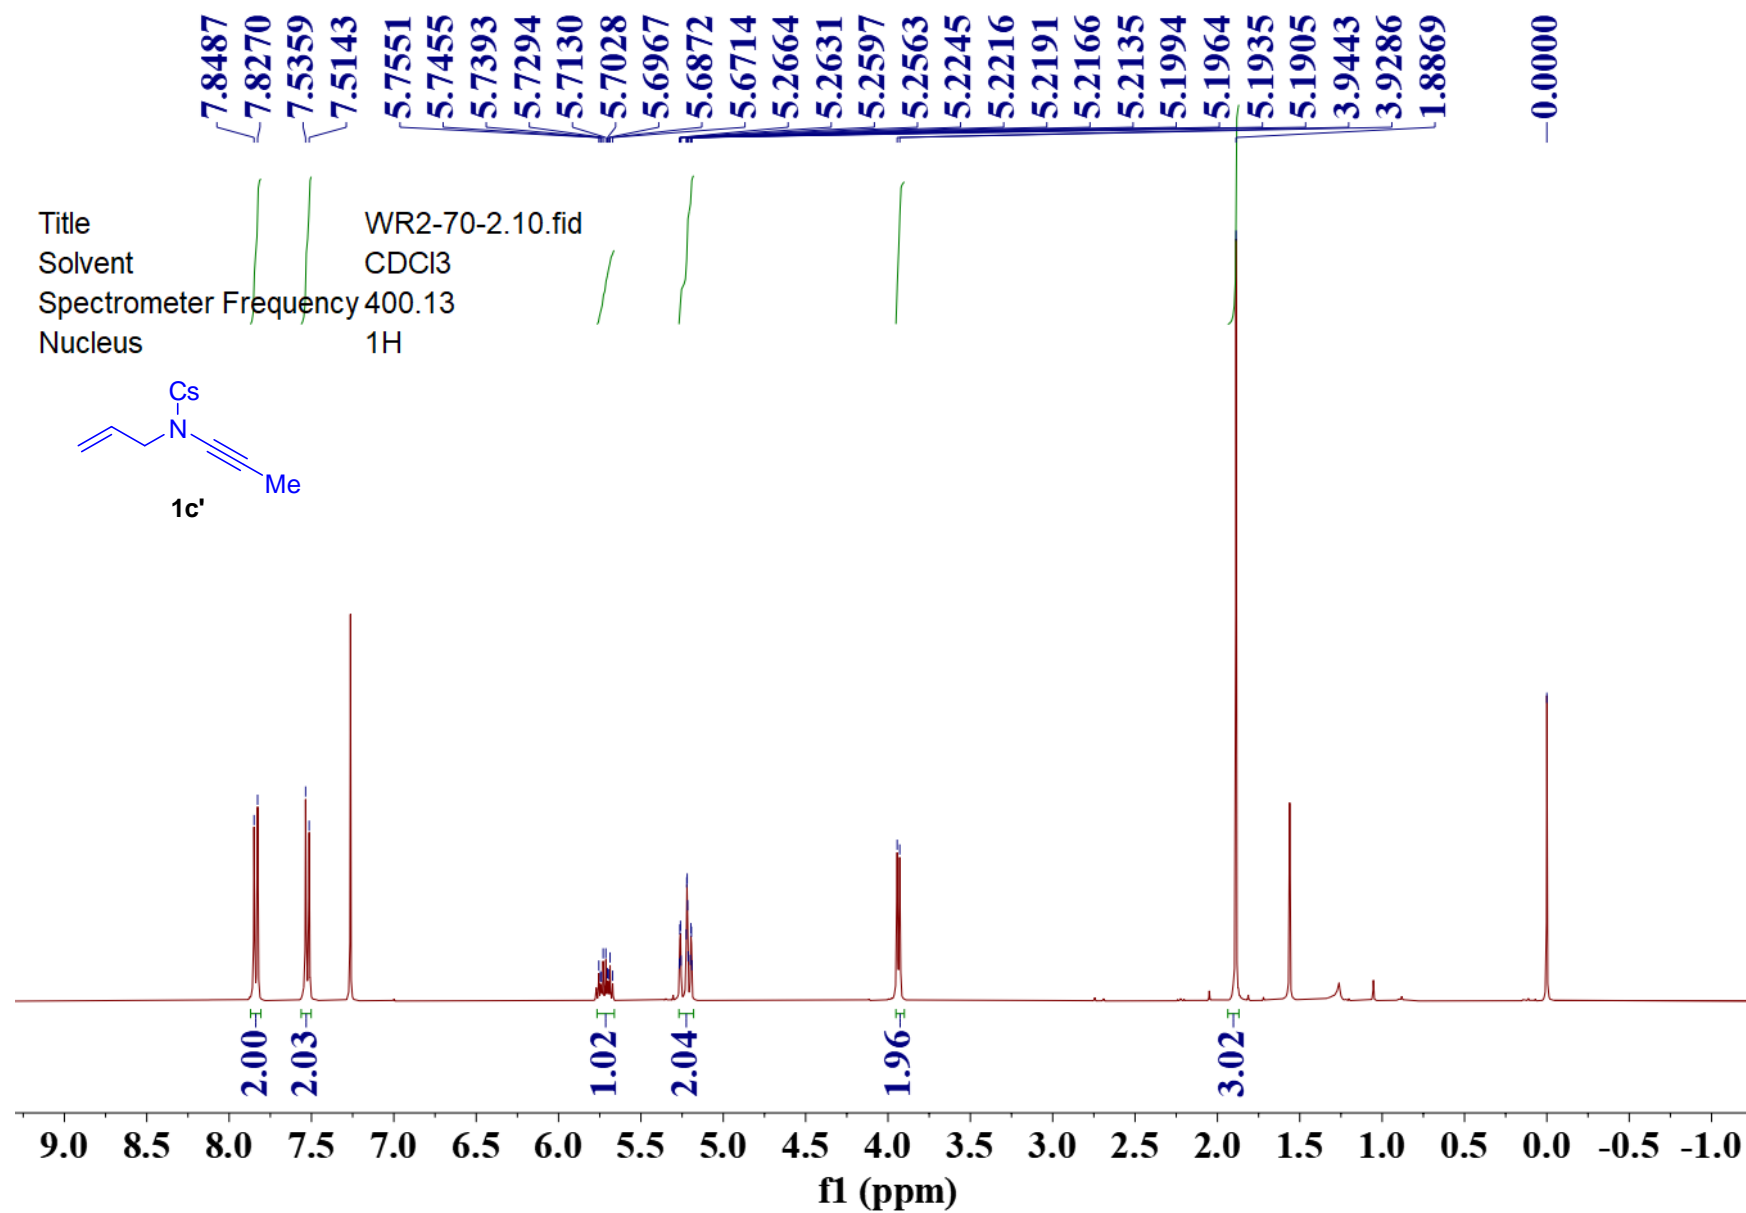

Title WR2-70-2.10.fid  
Solvent CDCl3  
Spectrometer Frequency 100.62  
Nucleus 13C

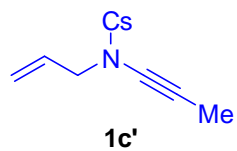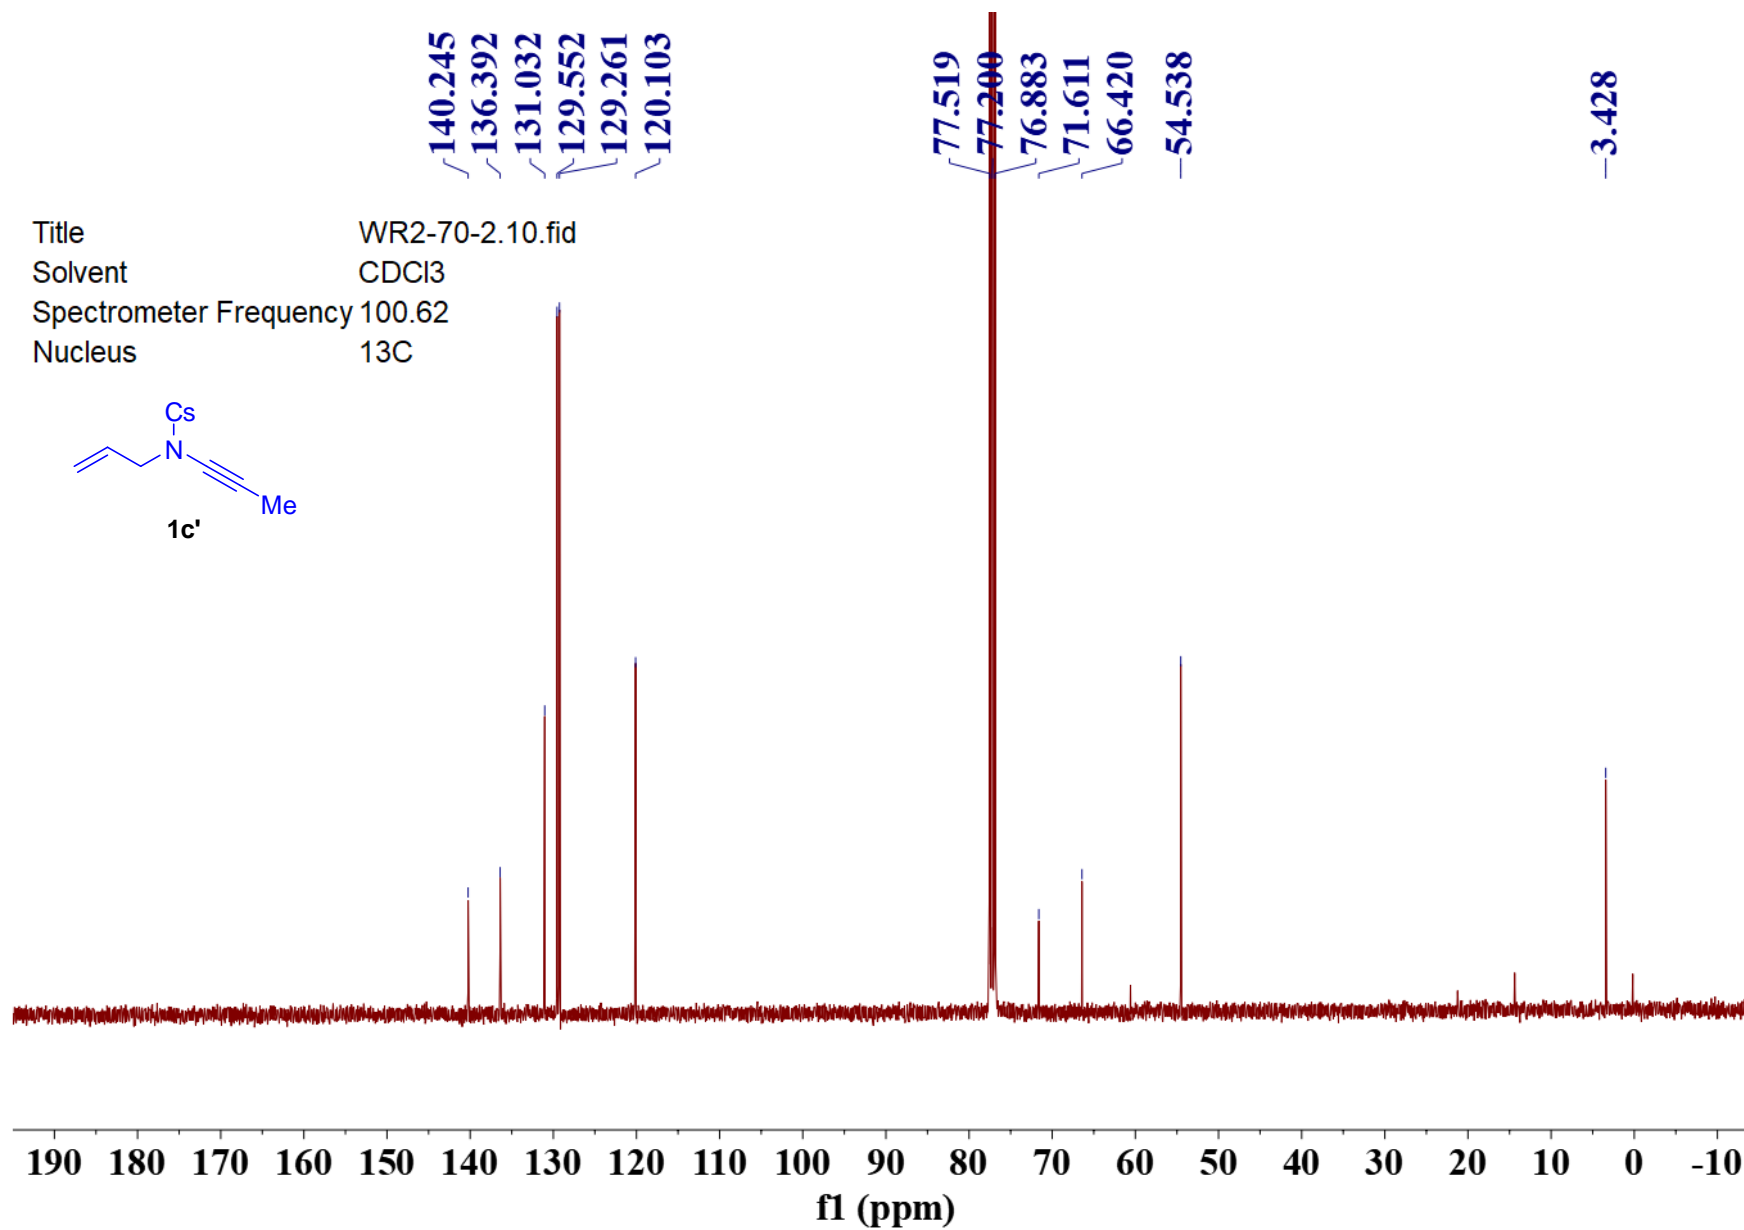

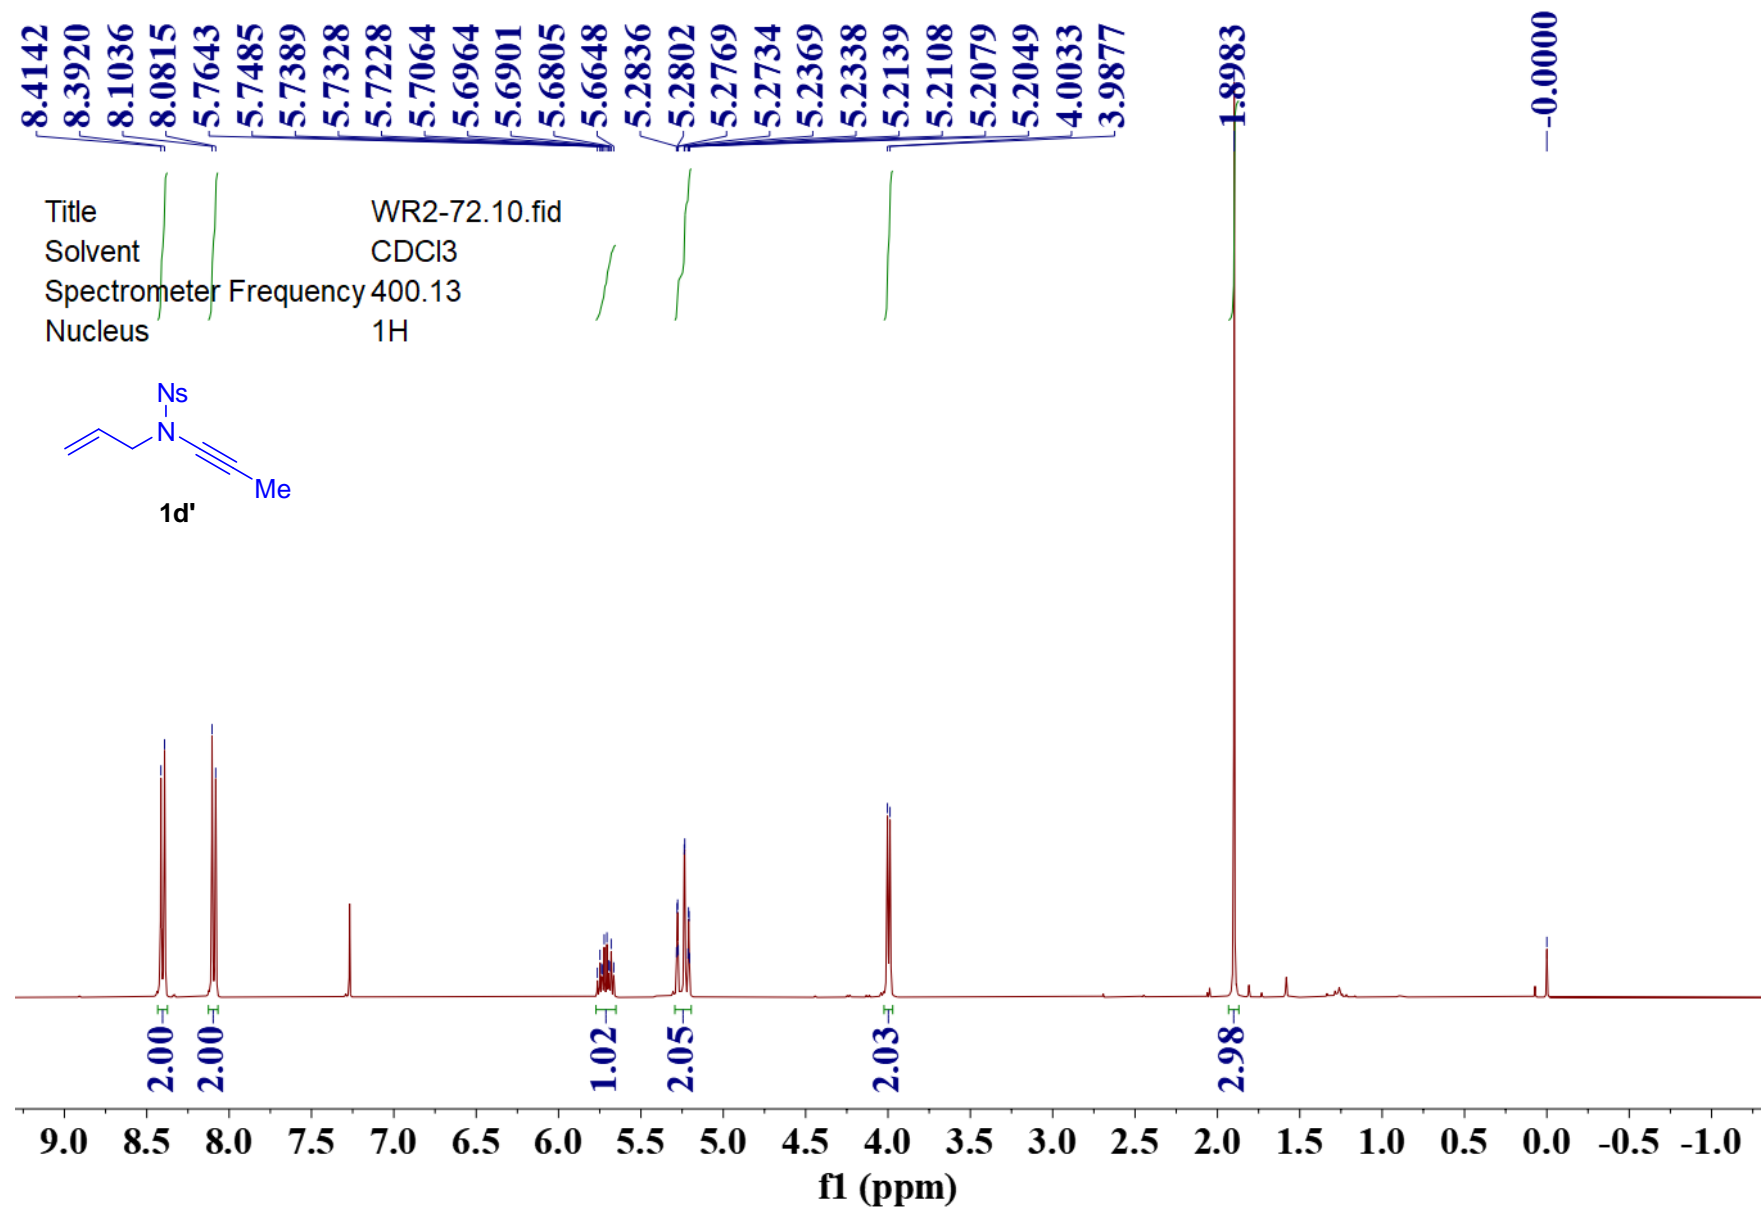

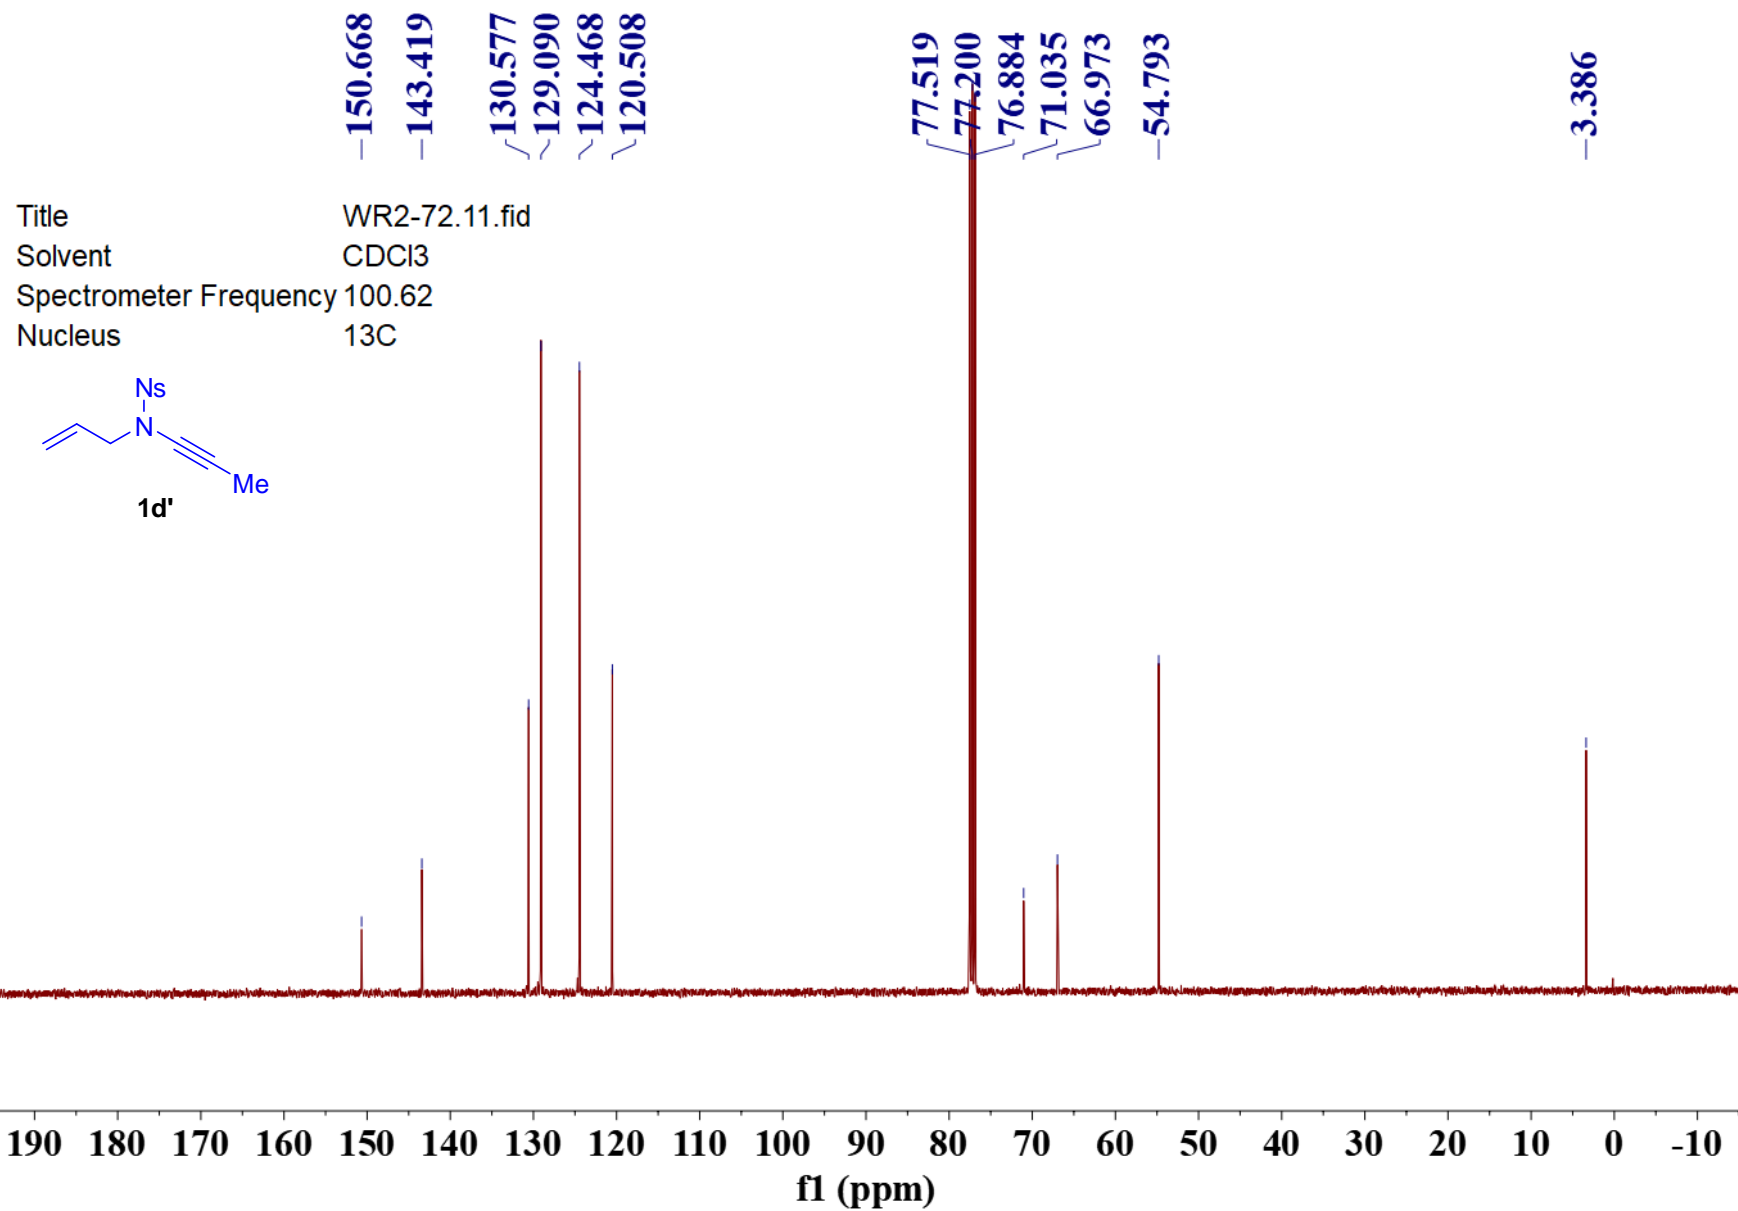

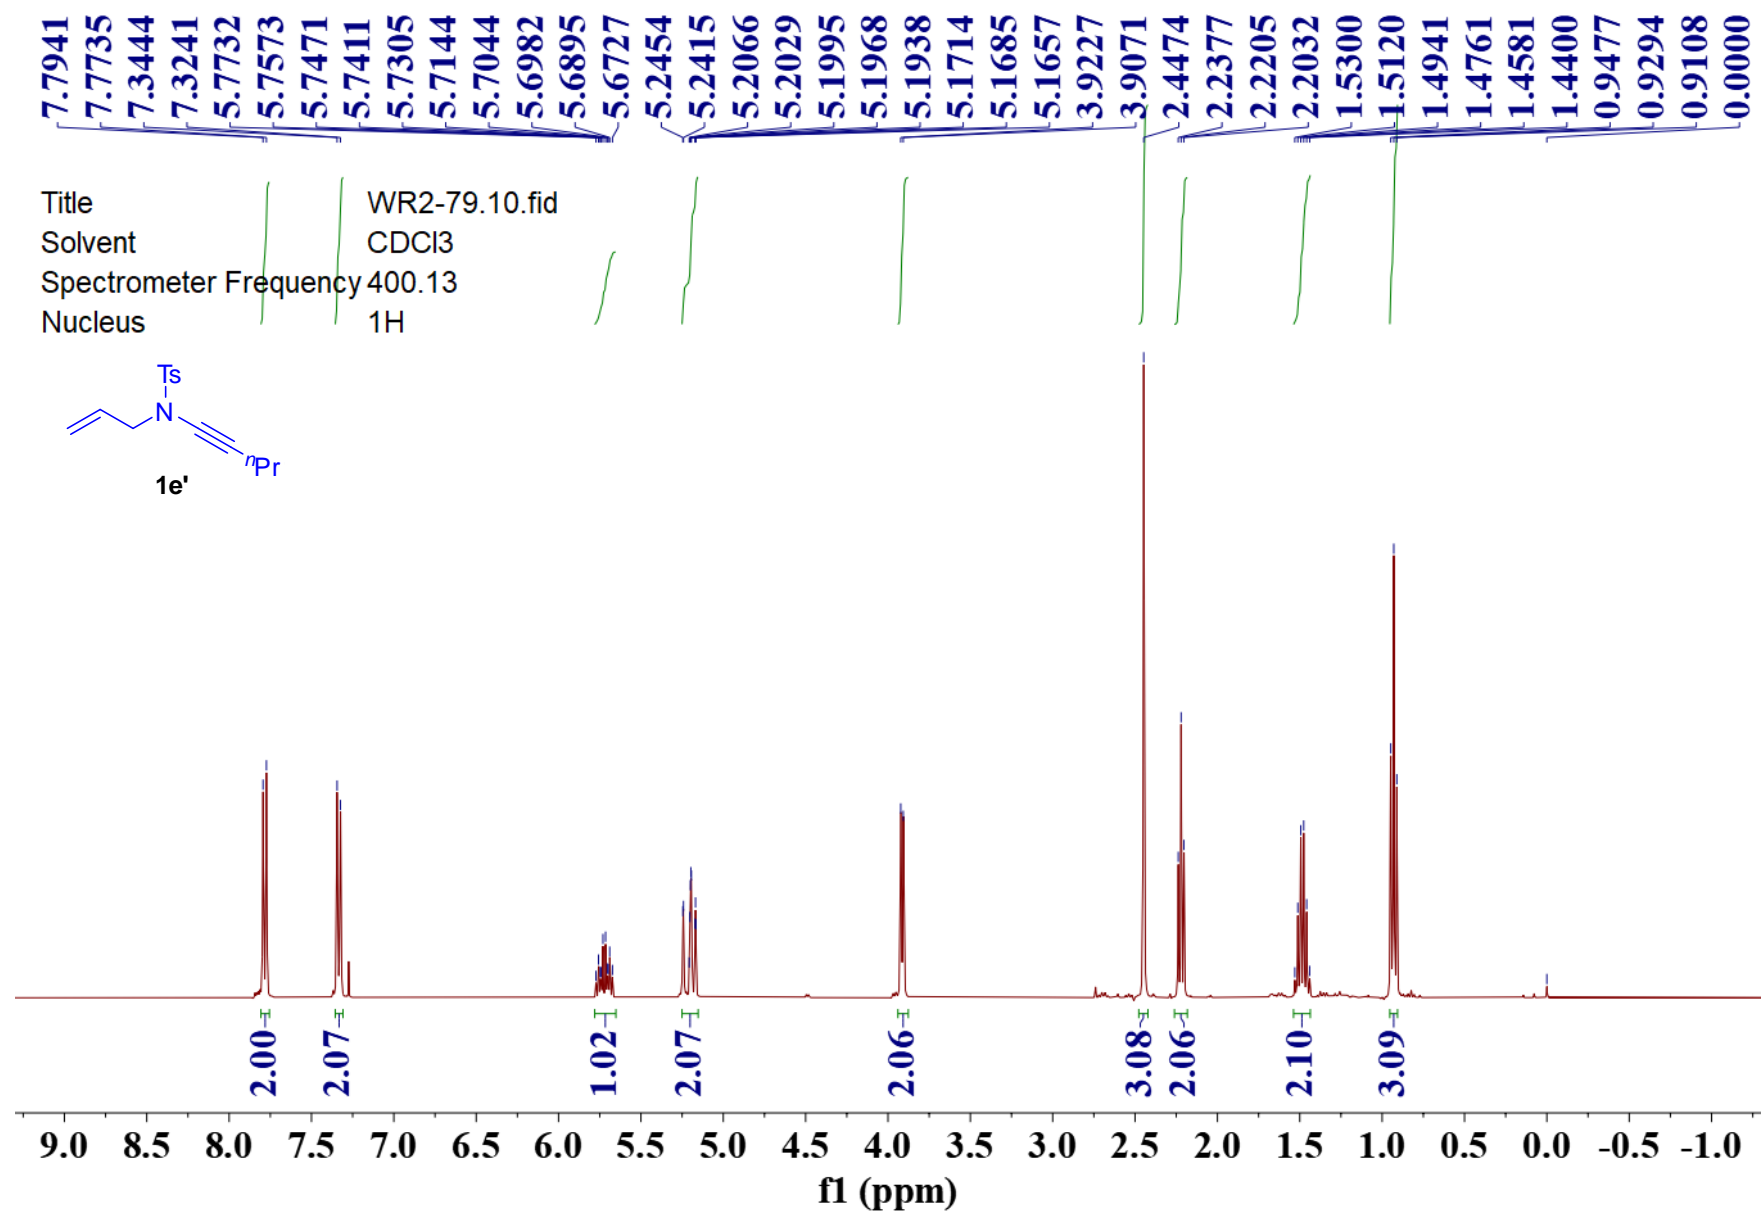

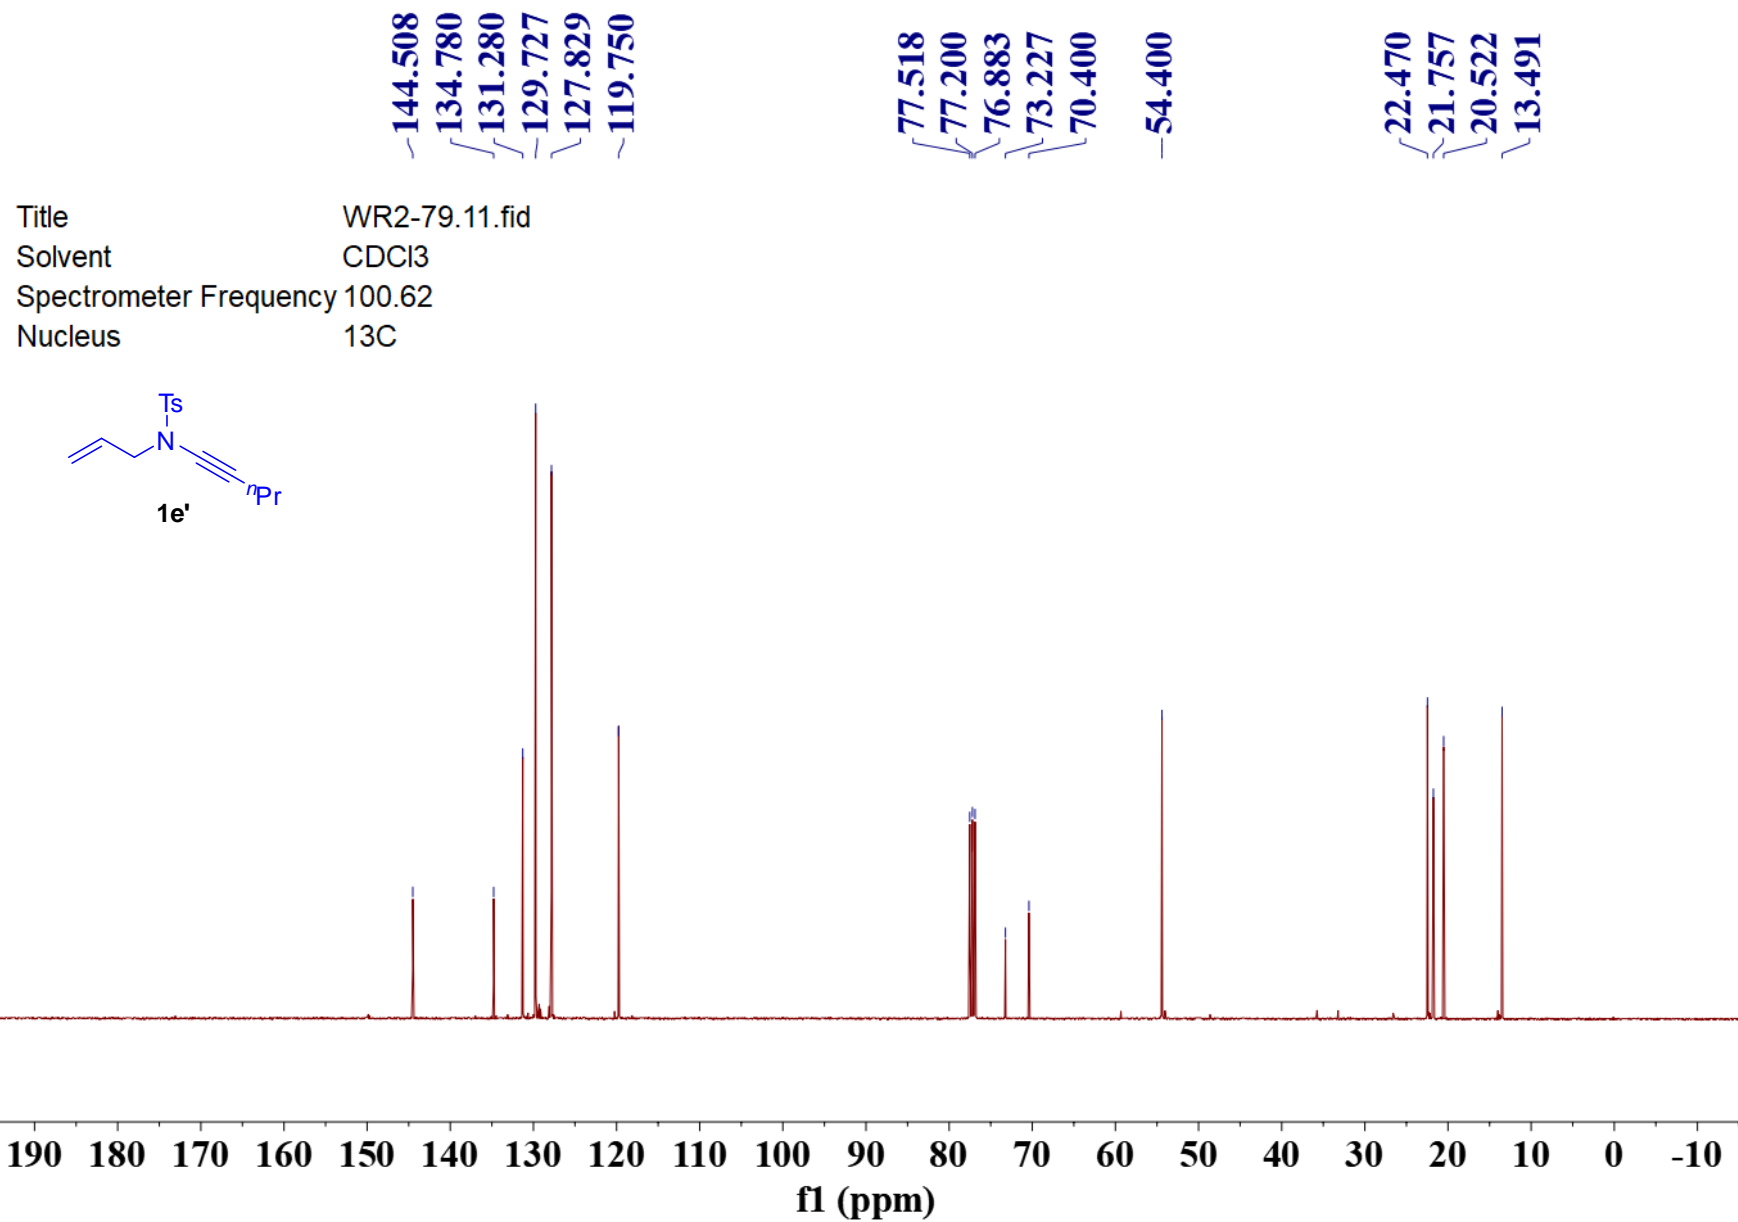

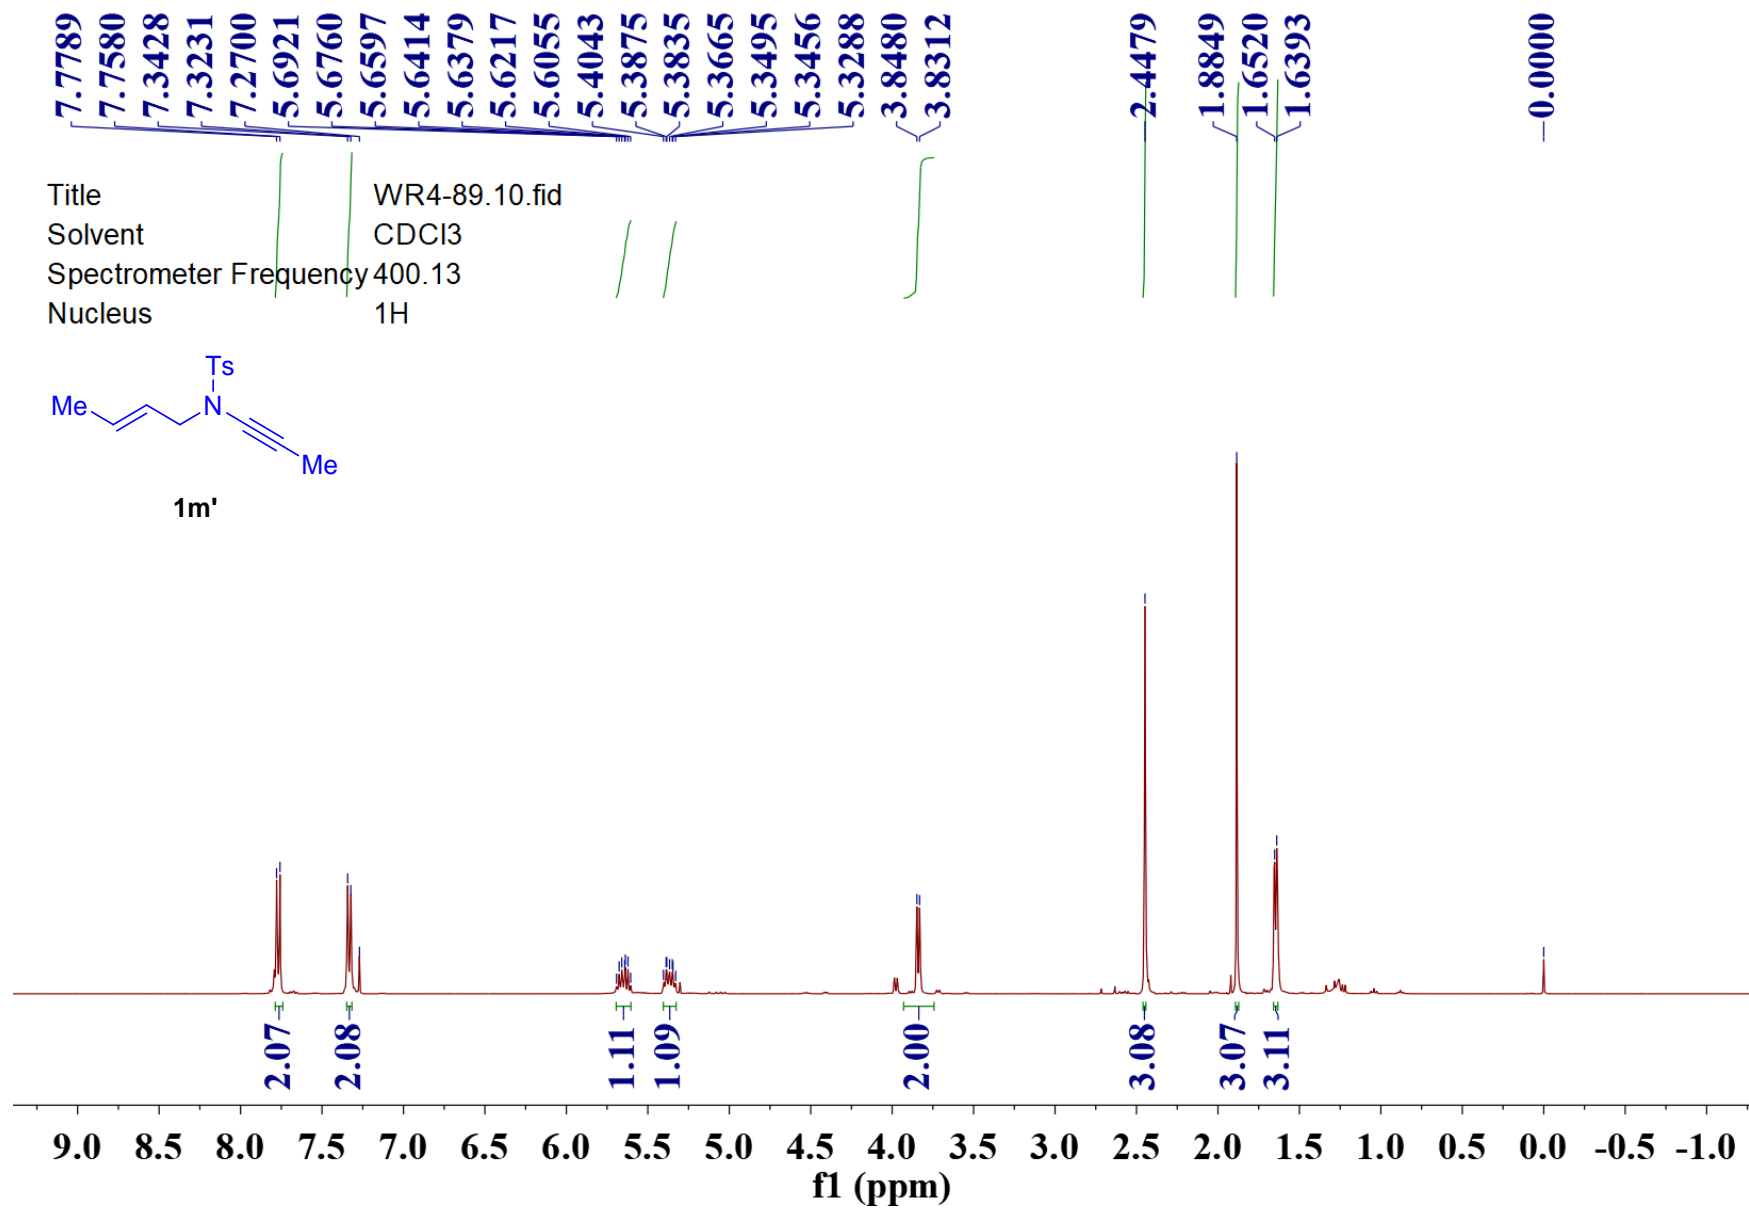



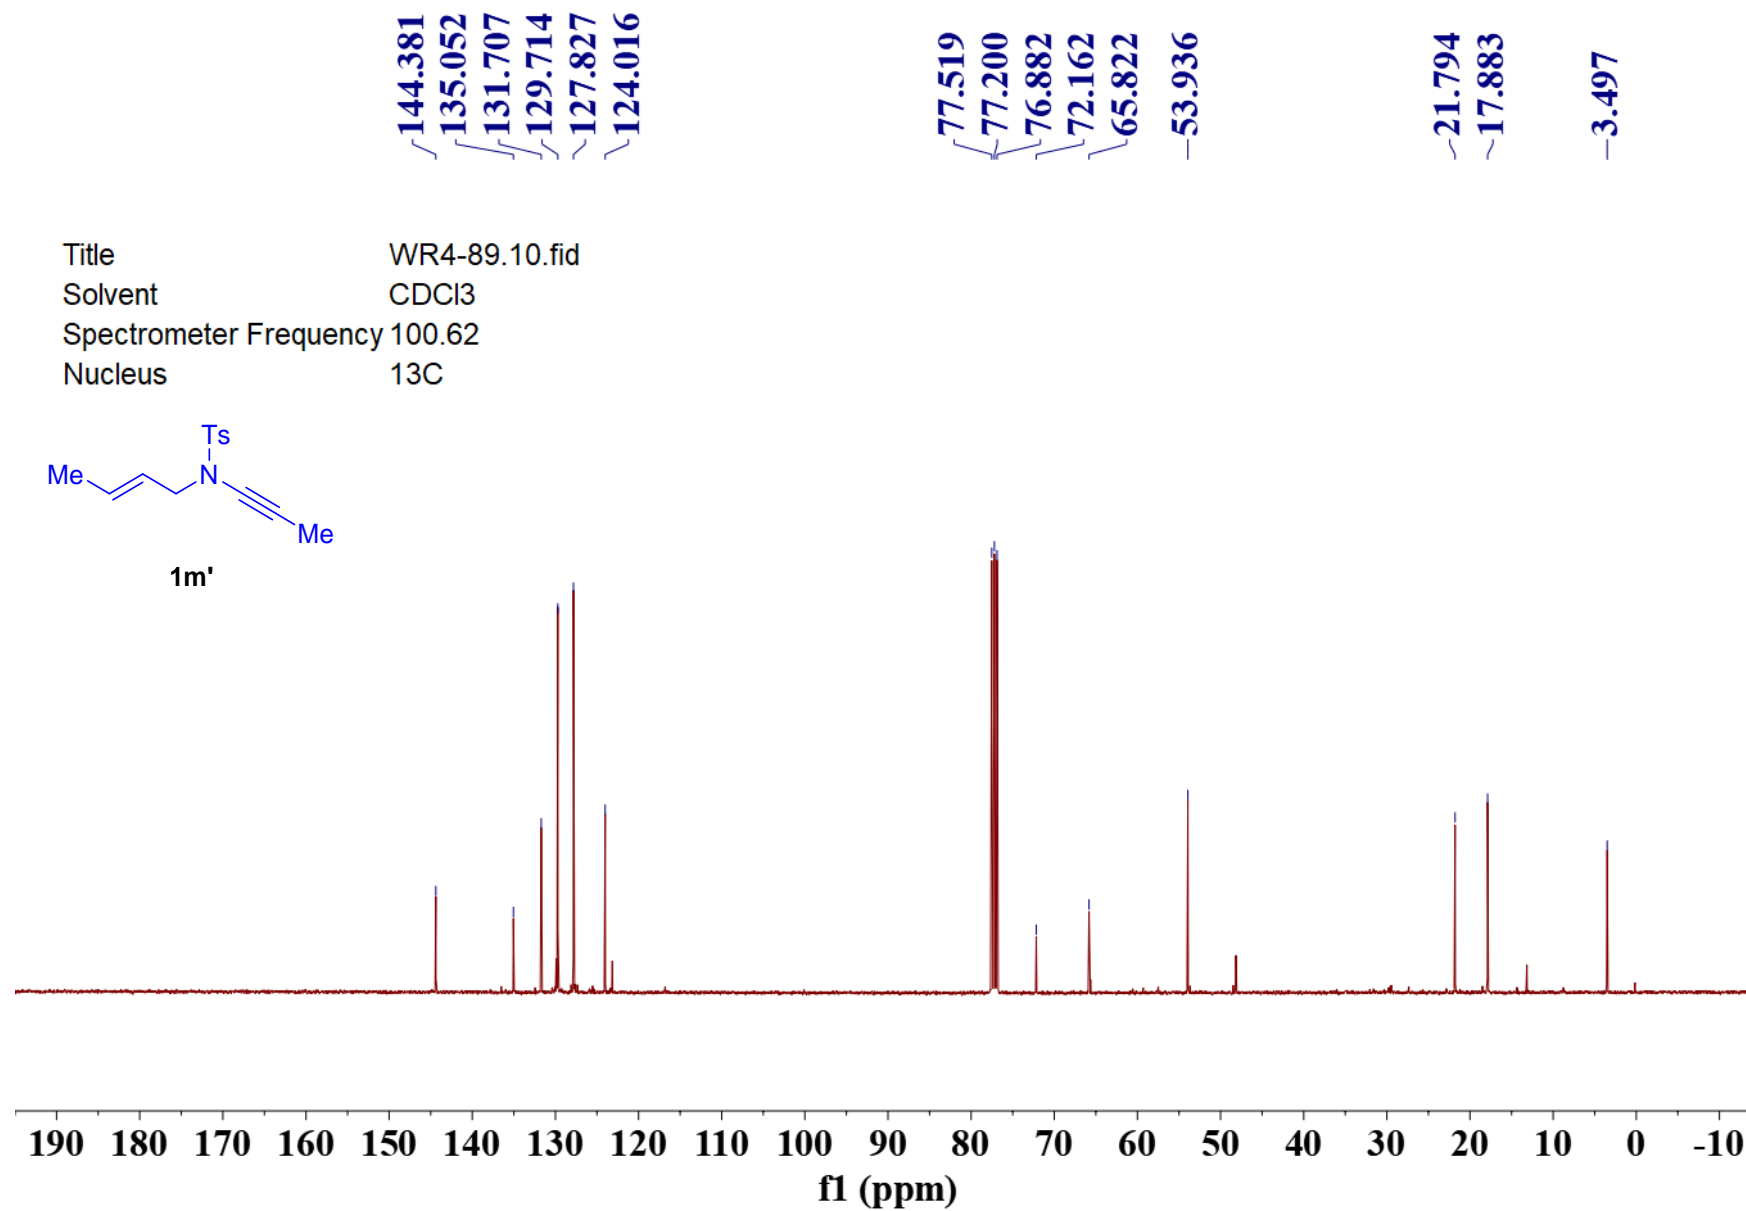

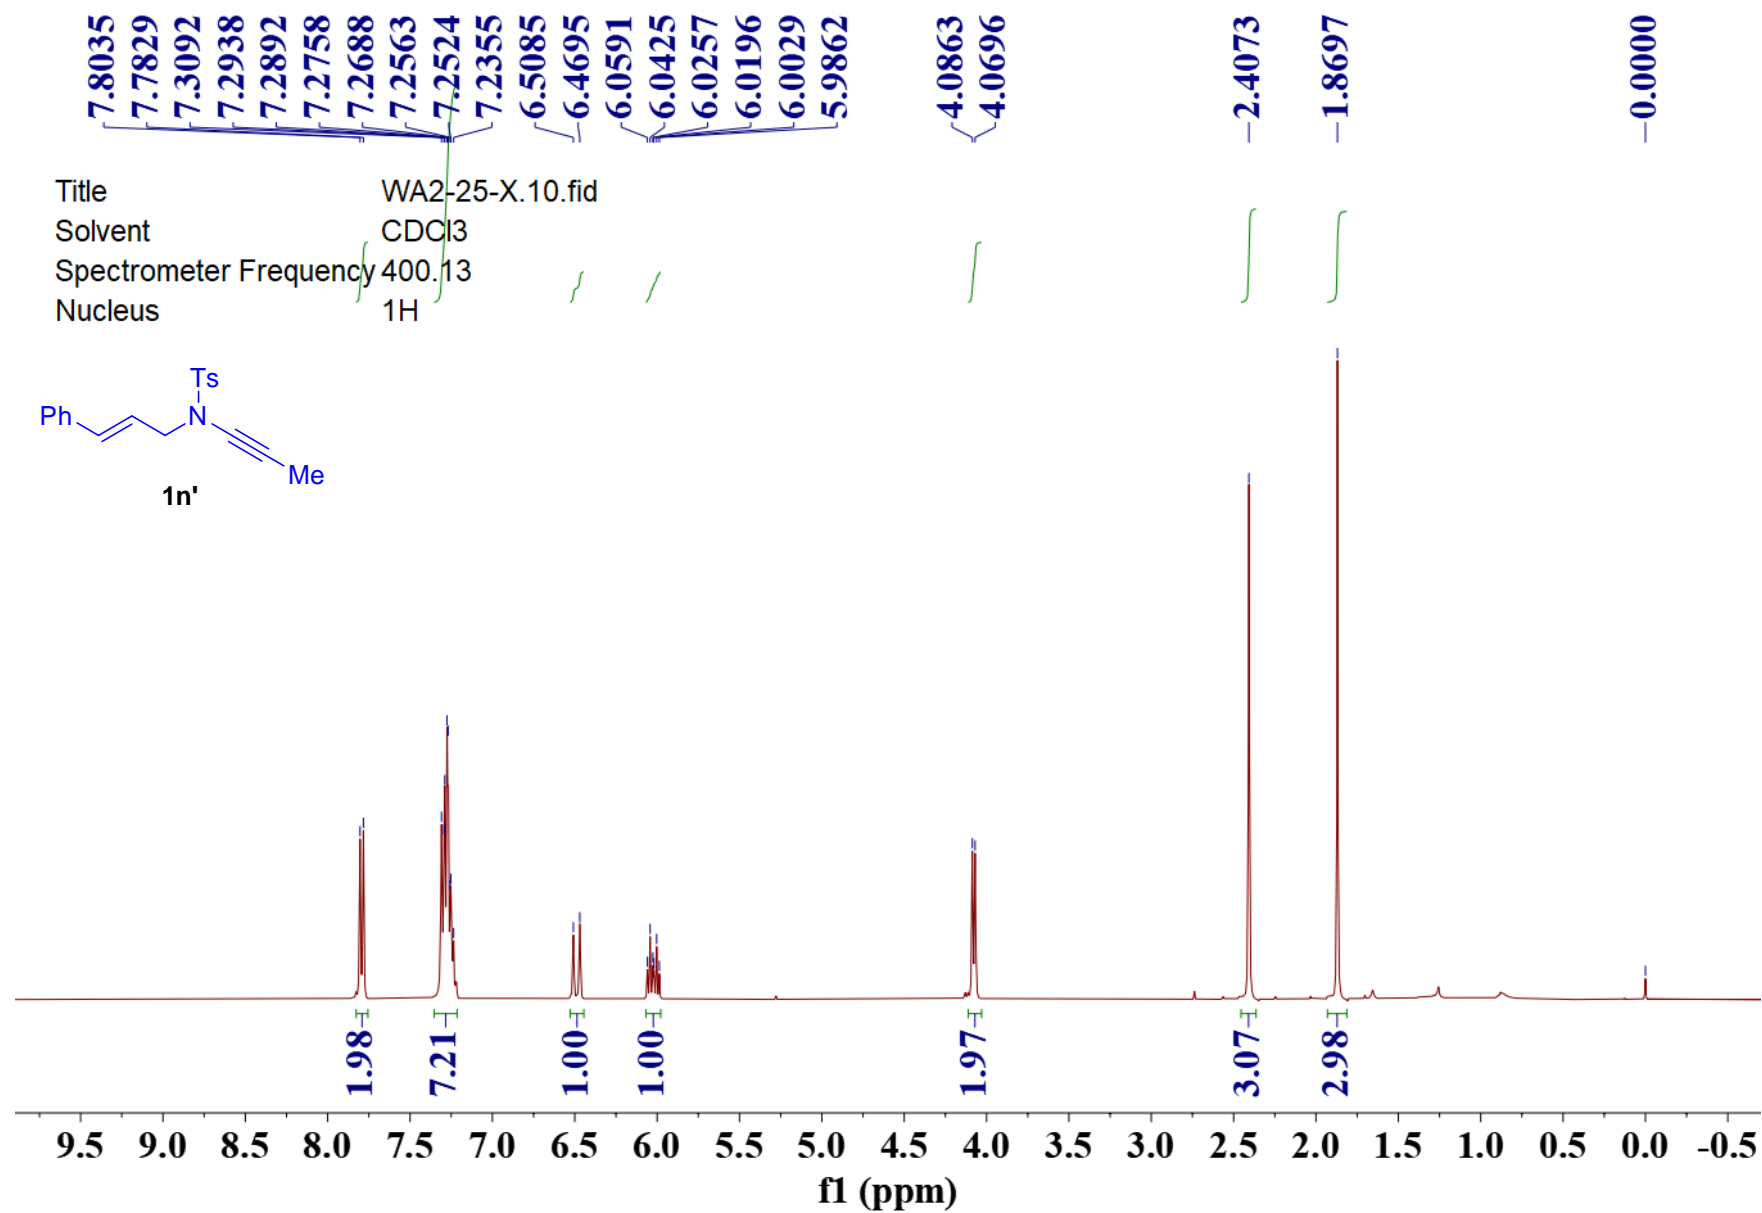

Title WA-2-25-X.10.fid  
Solvent CDCl<sub>3</sub>  
Spectrometer Frequency 100.62  
Nucleus <sup>13</sup>C

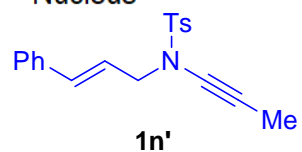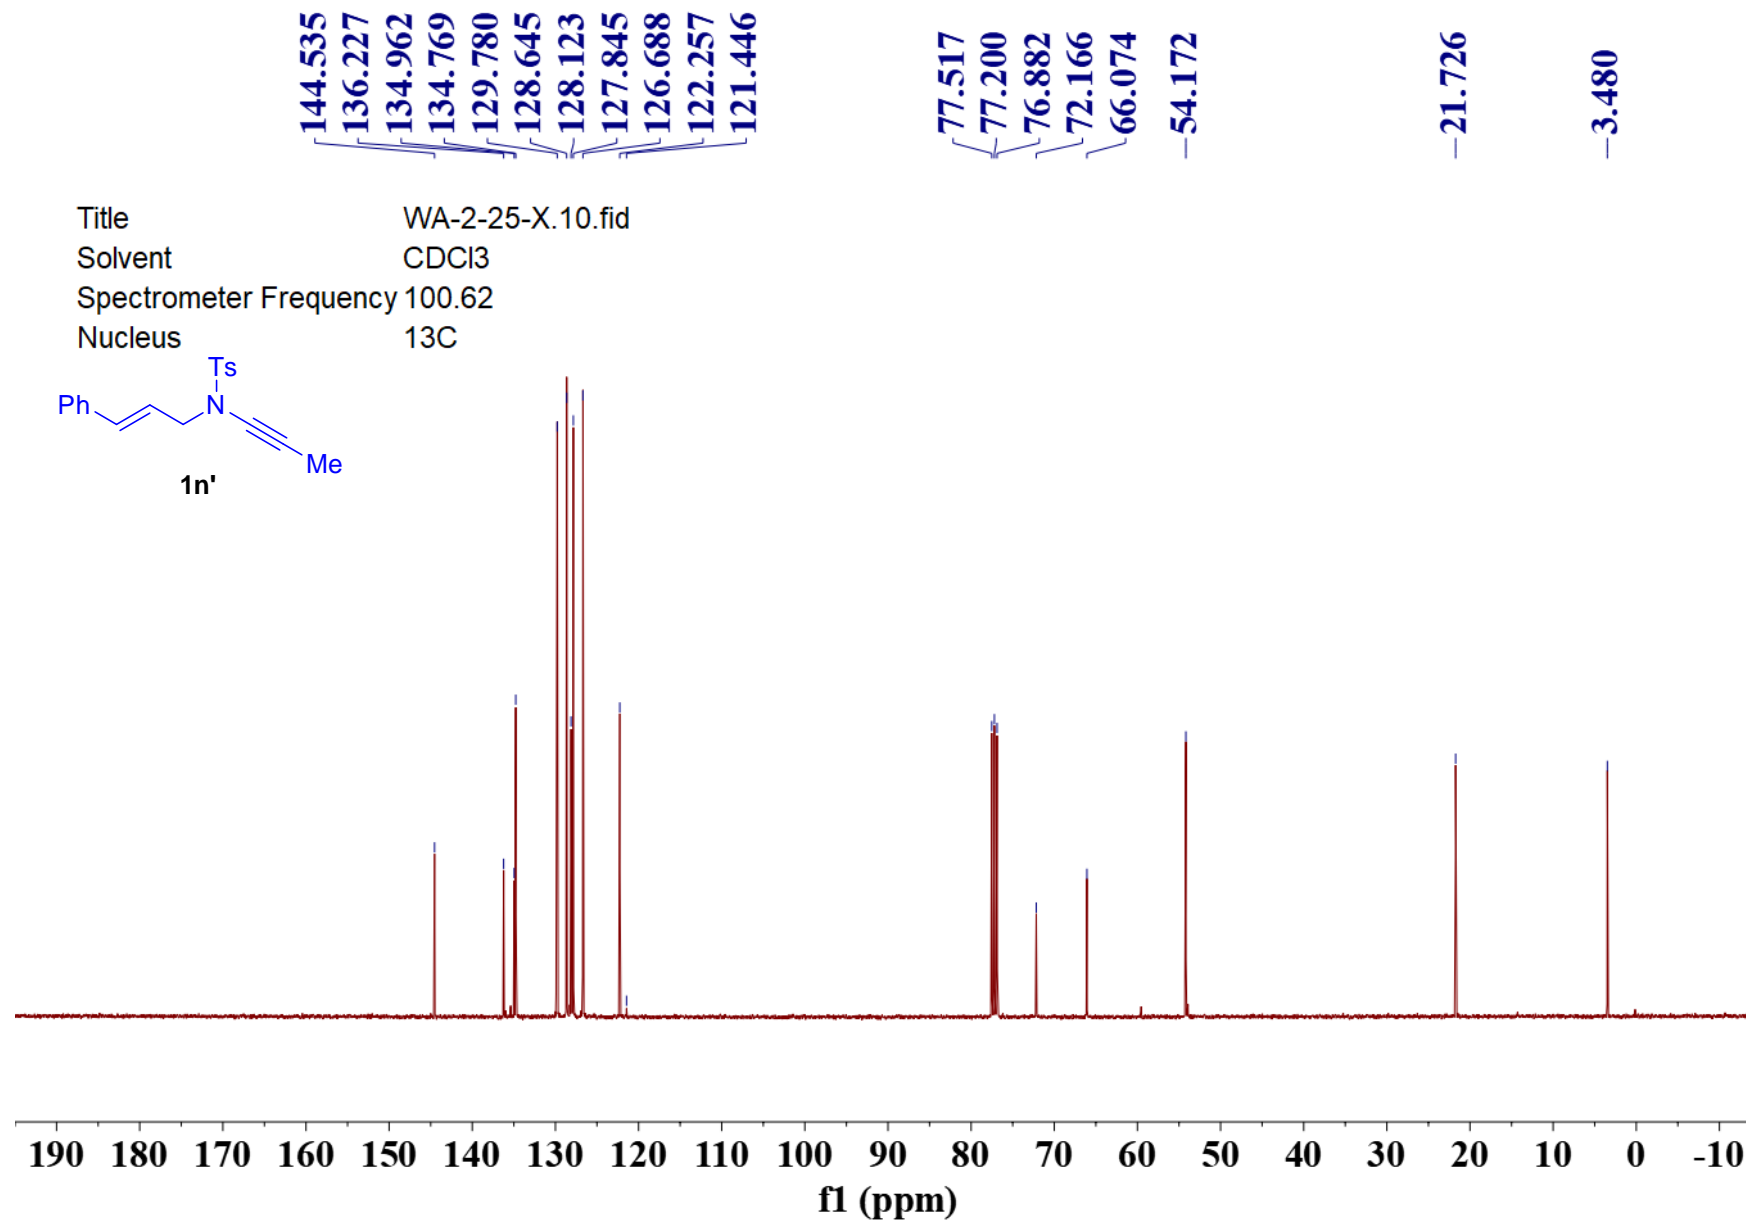

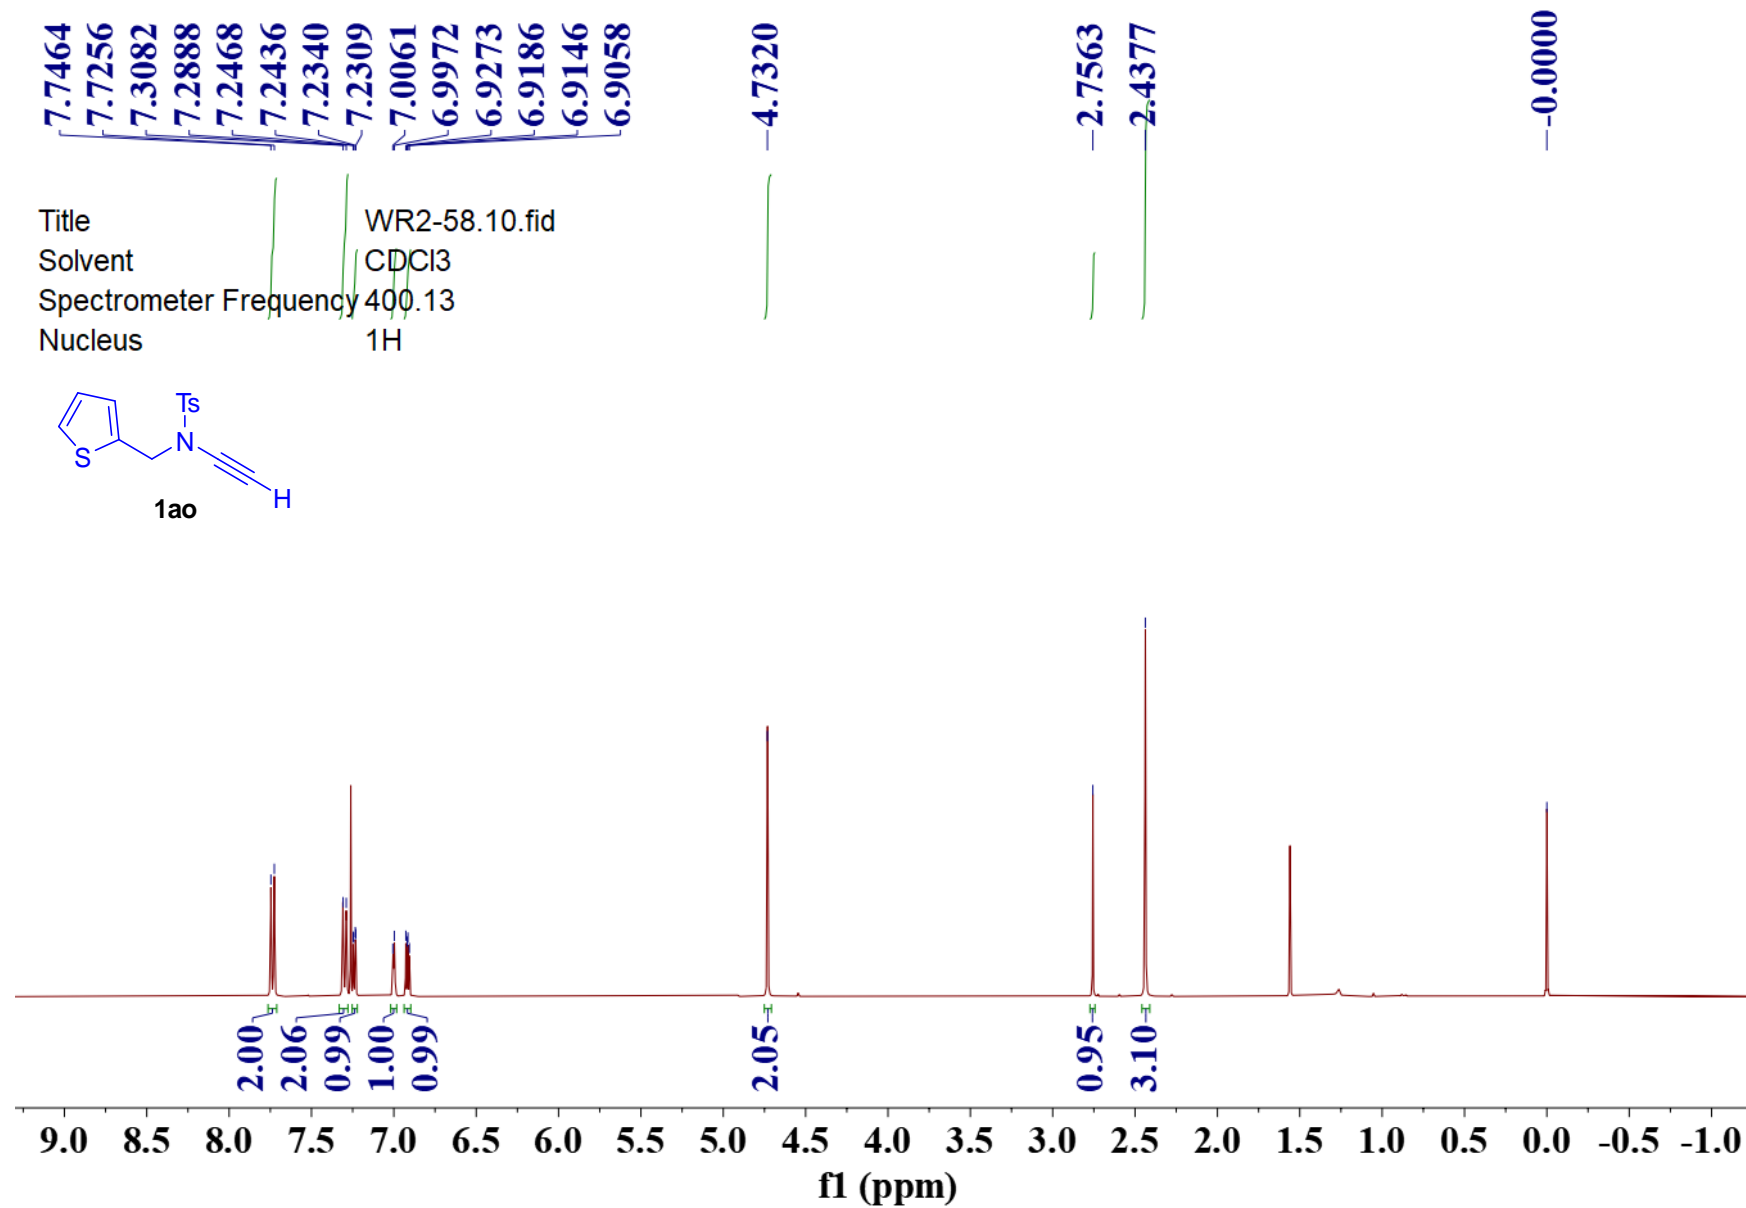

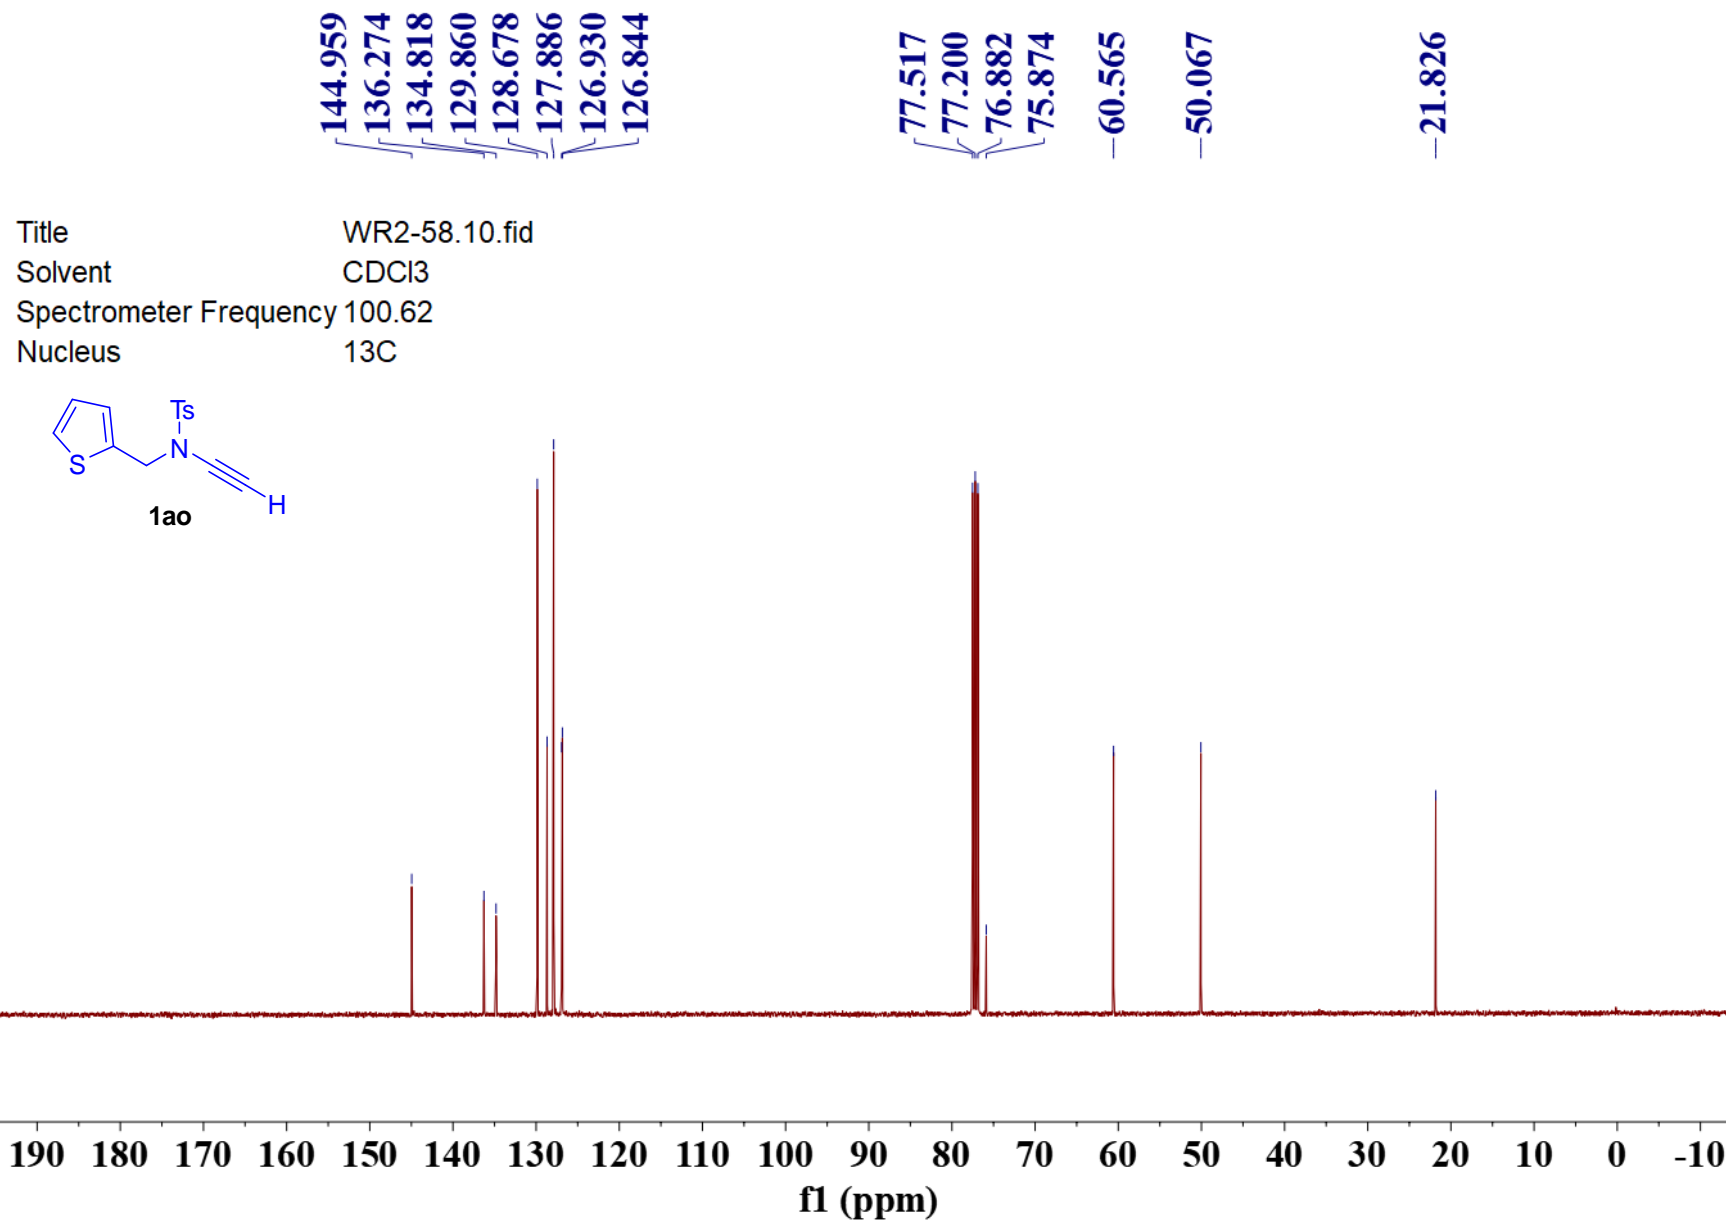

Title  
 Solvent  
 Spectrometer Frequency  
 Nucleus

WR2-68.10.fid  
 CDCl<sub>3</sub>  
 400.13  
<sup>1</sup>H

7.8777  
 7.8560  
 7.5548  
 7.5332  
 5.7757  
 5.7598  
 5.7504  
 5.7440  
 5.7342  
 5.7176  
 5.7077  
 5.7015  
 5.6919  
 5.6761  
 5.2920  
 5.2886  
 5.2853  
 5.2819  
 5.2523  
 5.2493  
 5.2462  
 5.2427  
 5.2392  
 5.2297  
 5.2269  
 5.2239  
 5.2211  
 3.9967  
 3.9808  
 2.7600  
 -0.0000

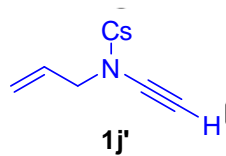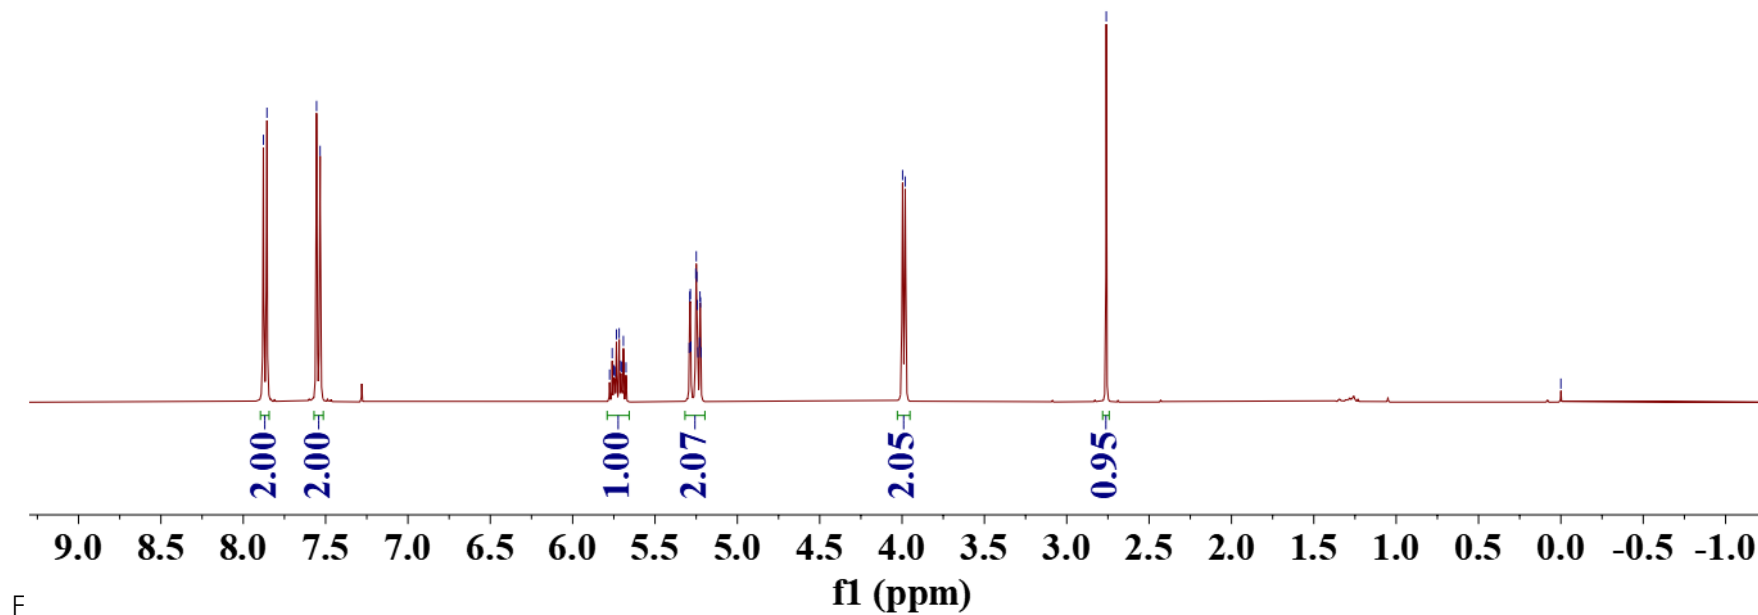

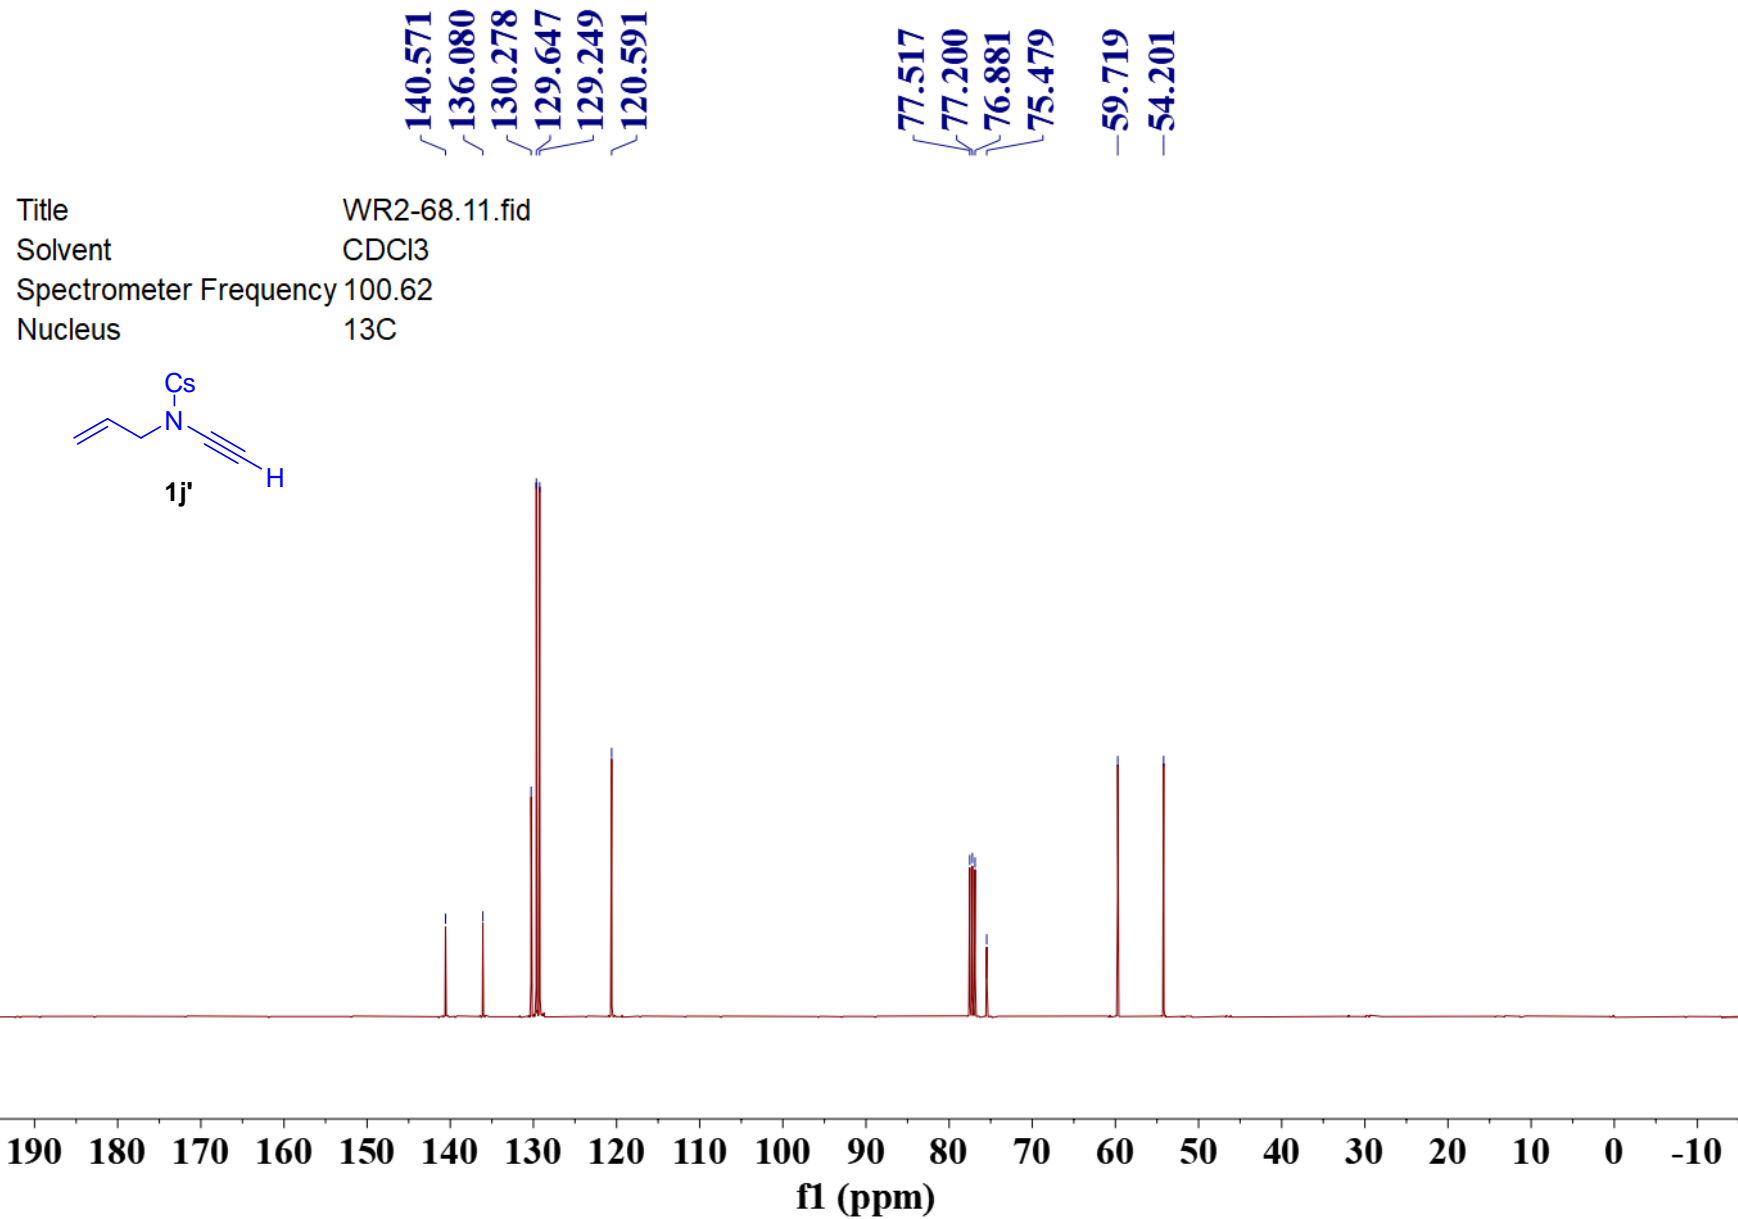



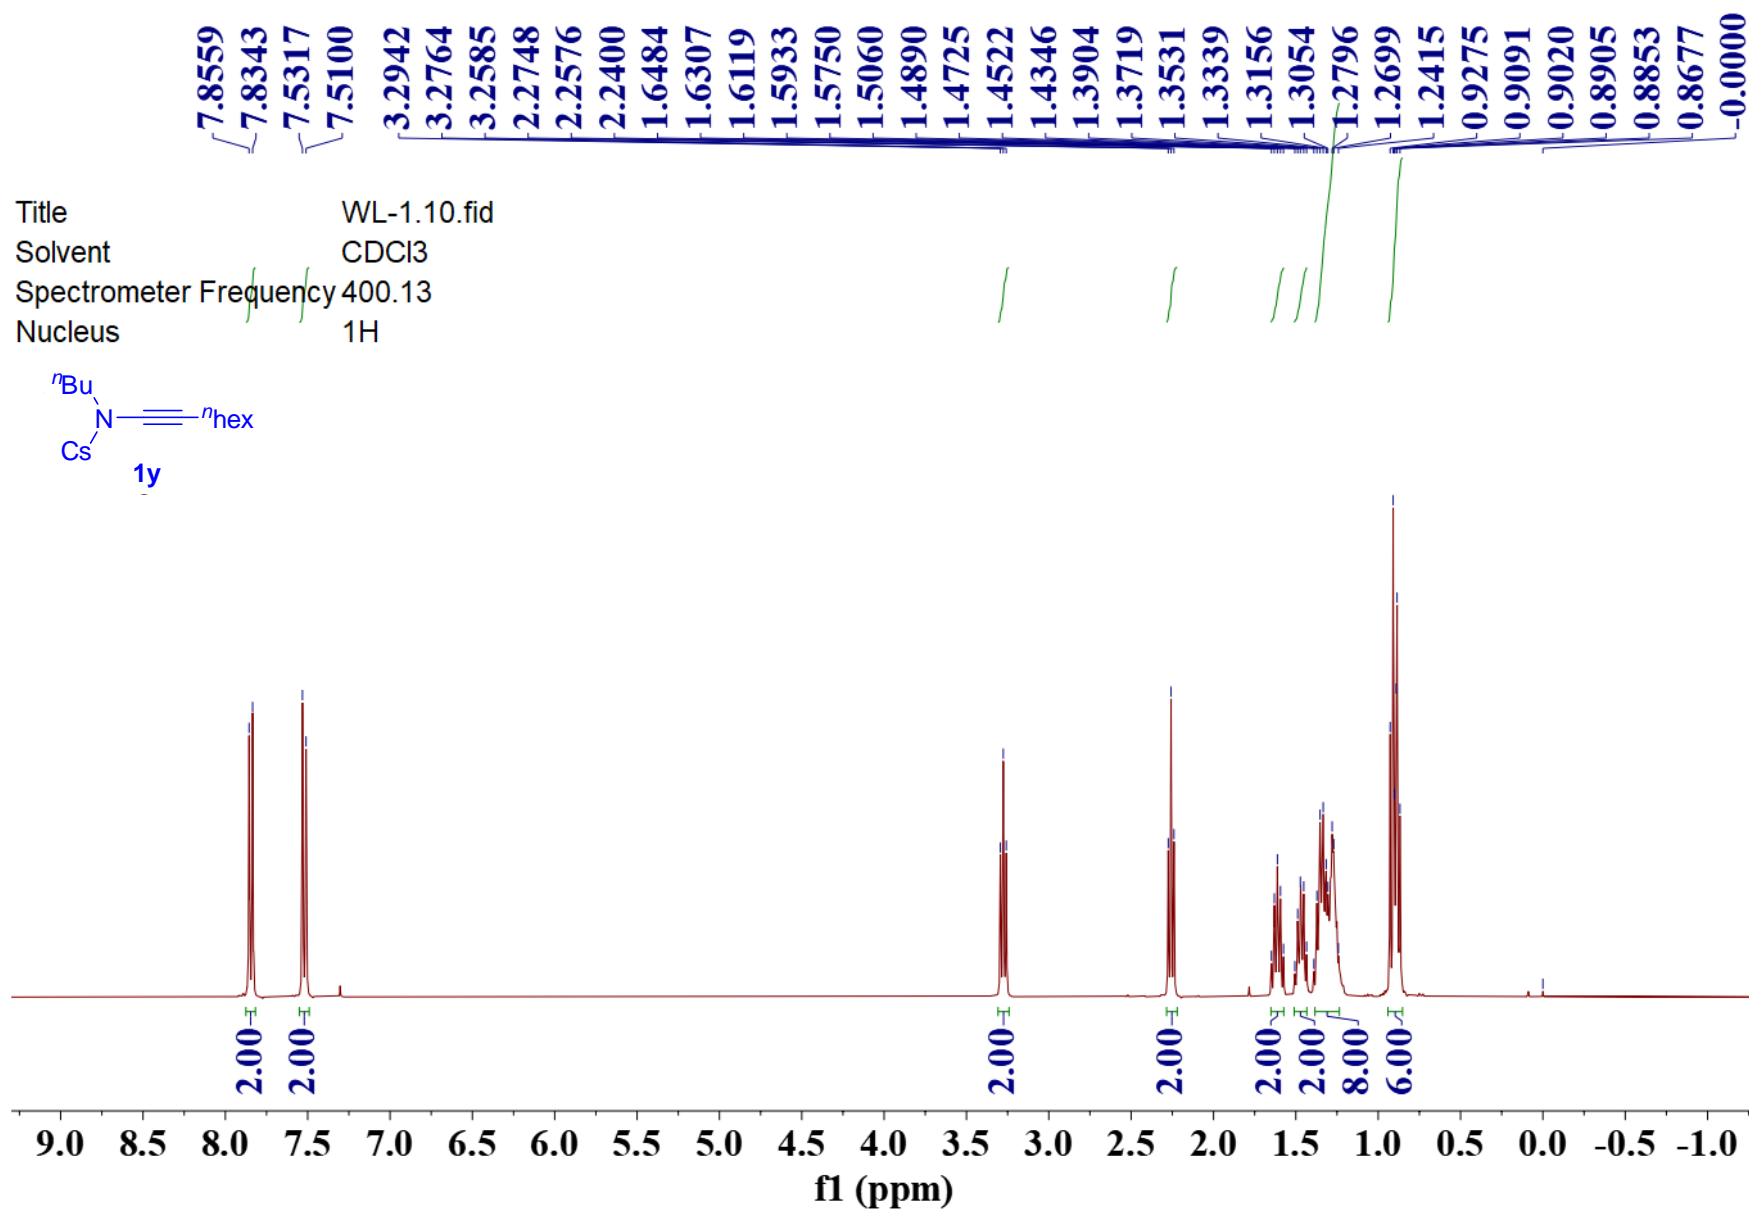

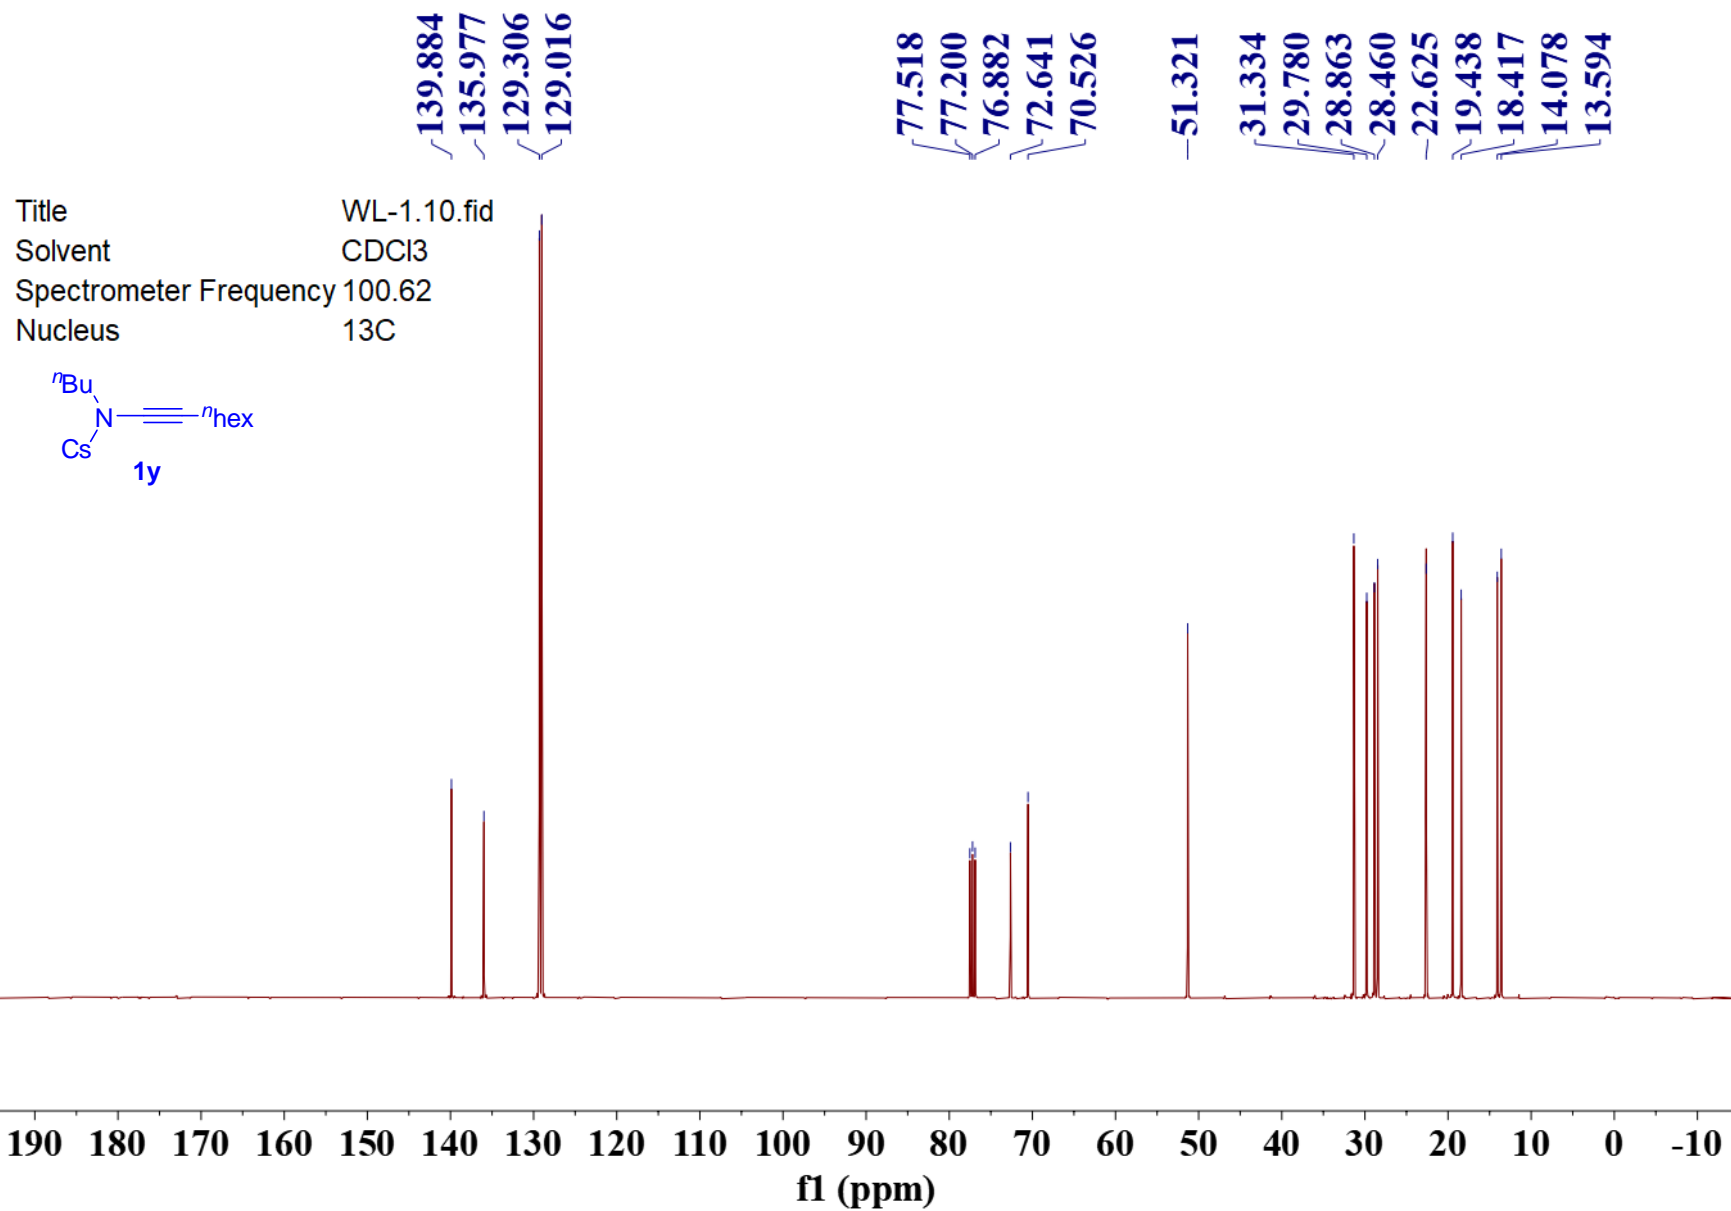

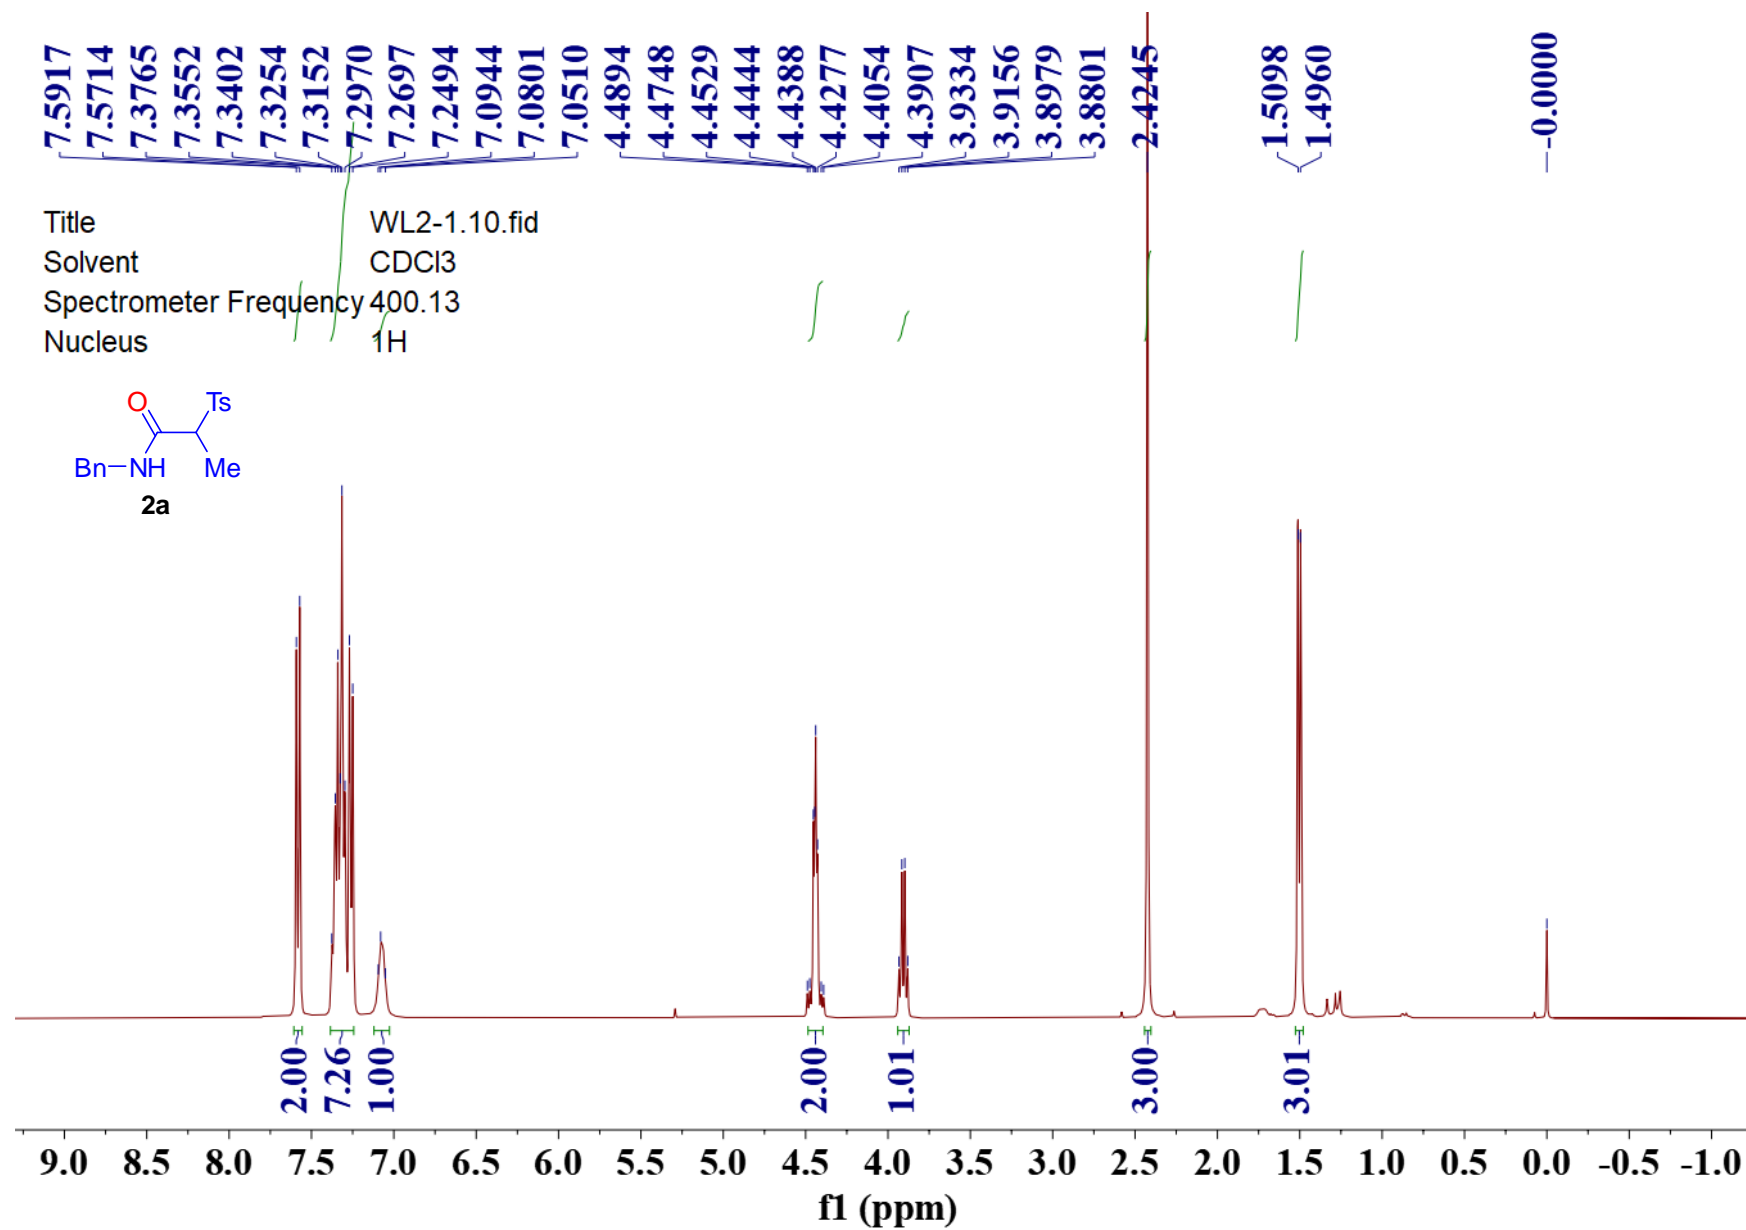

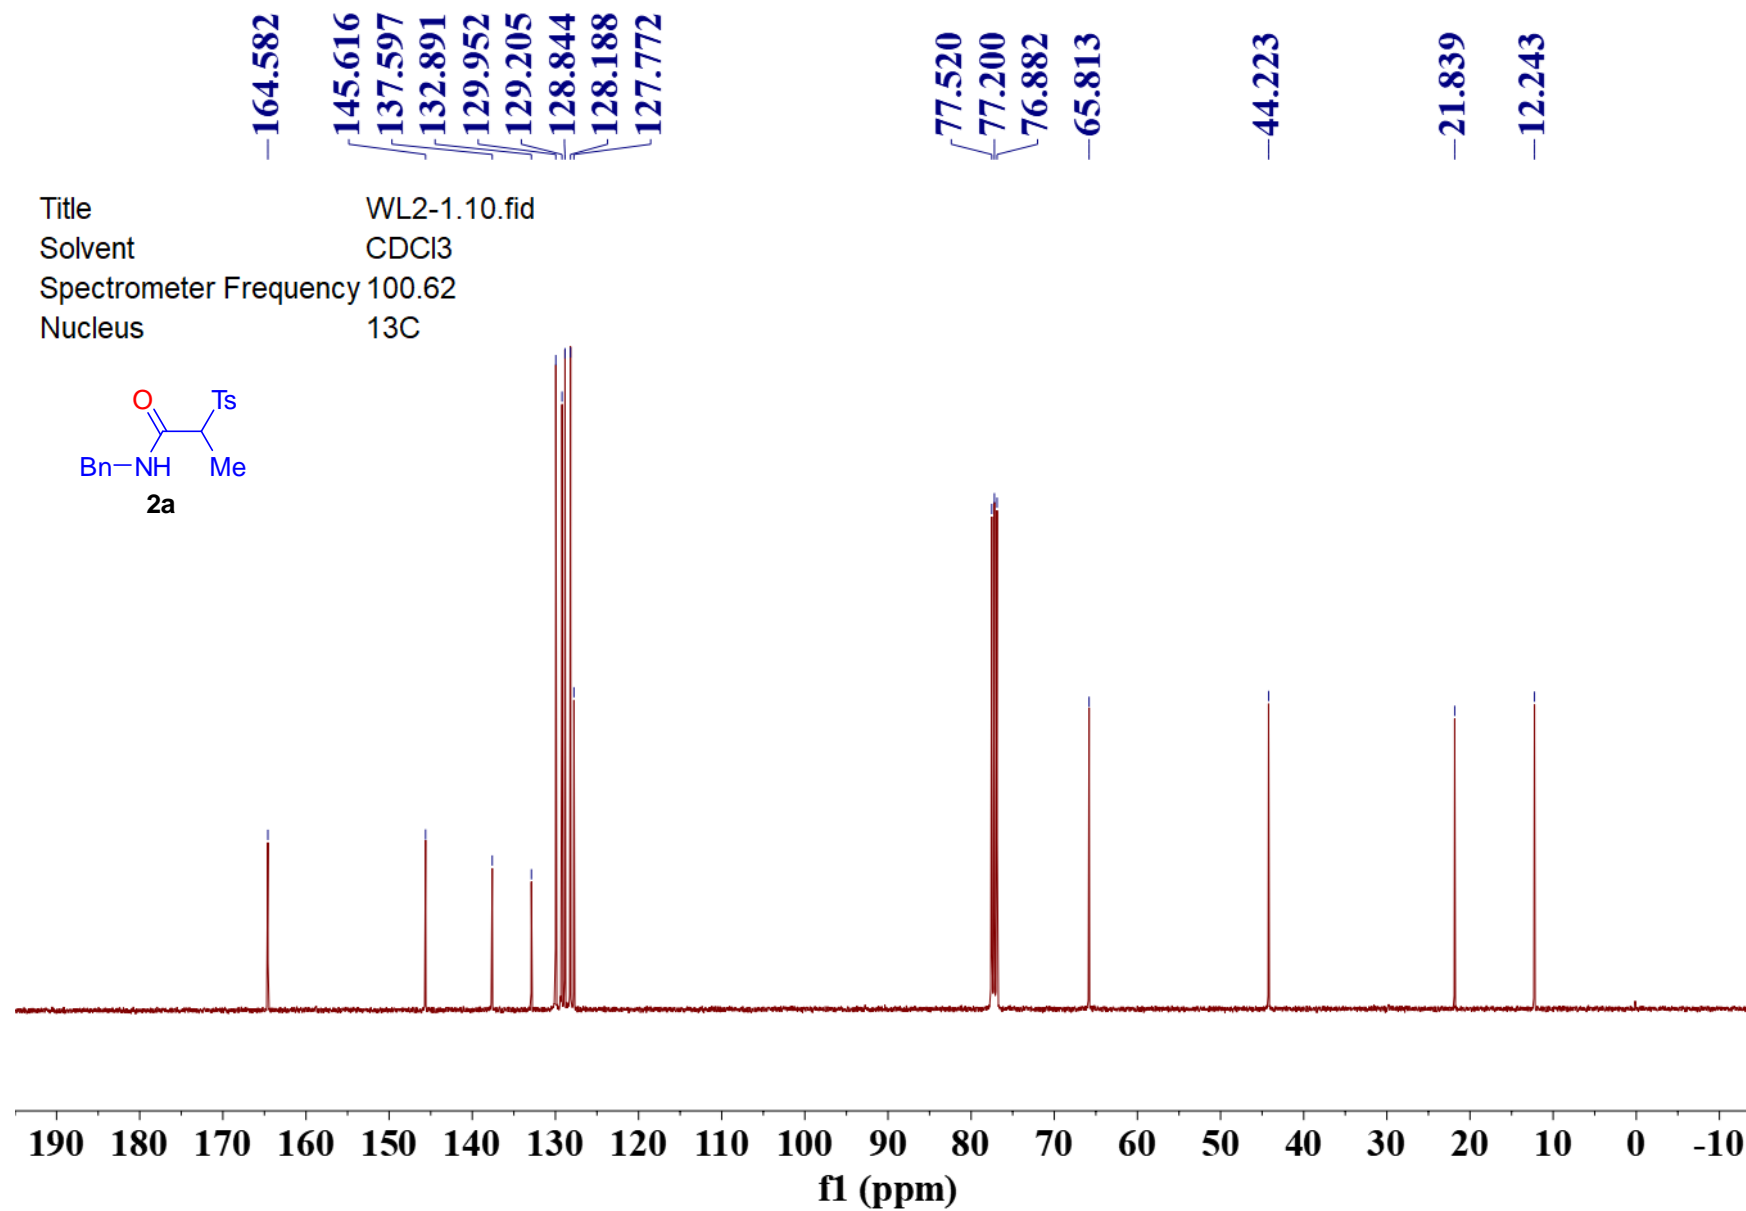

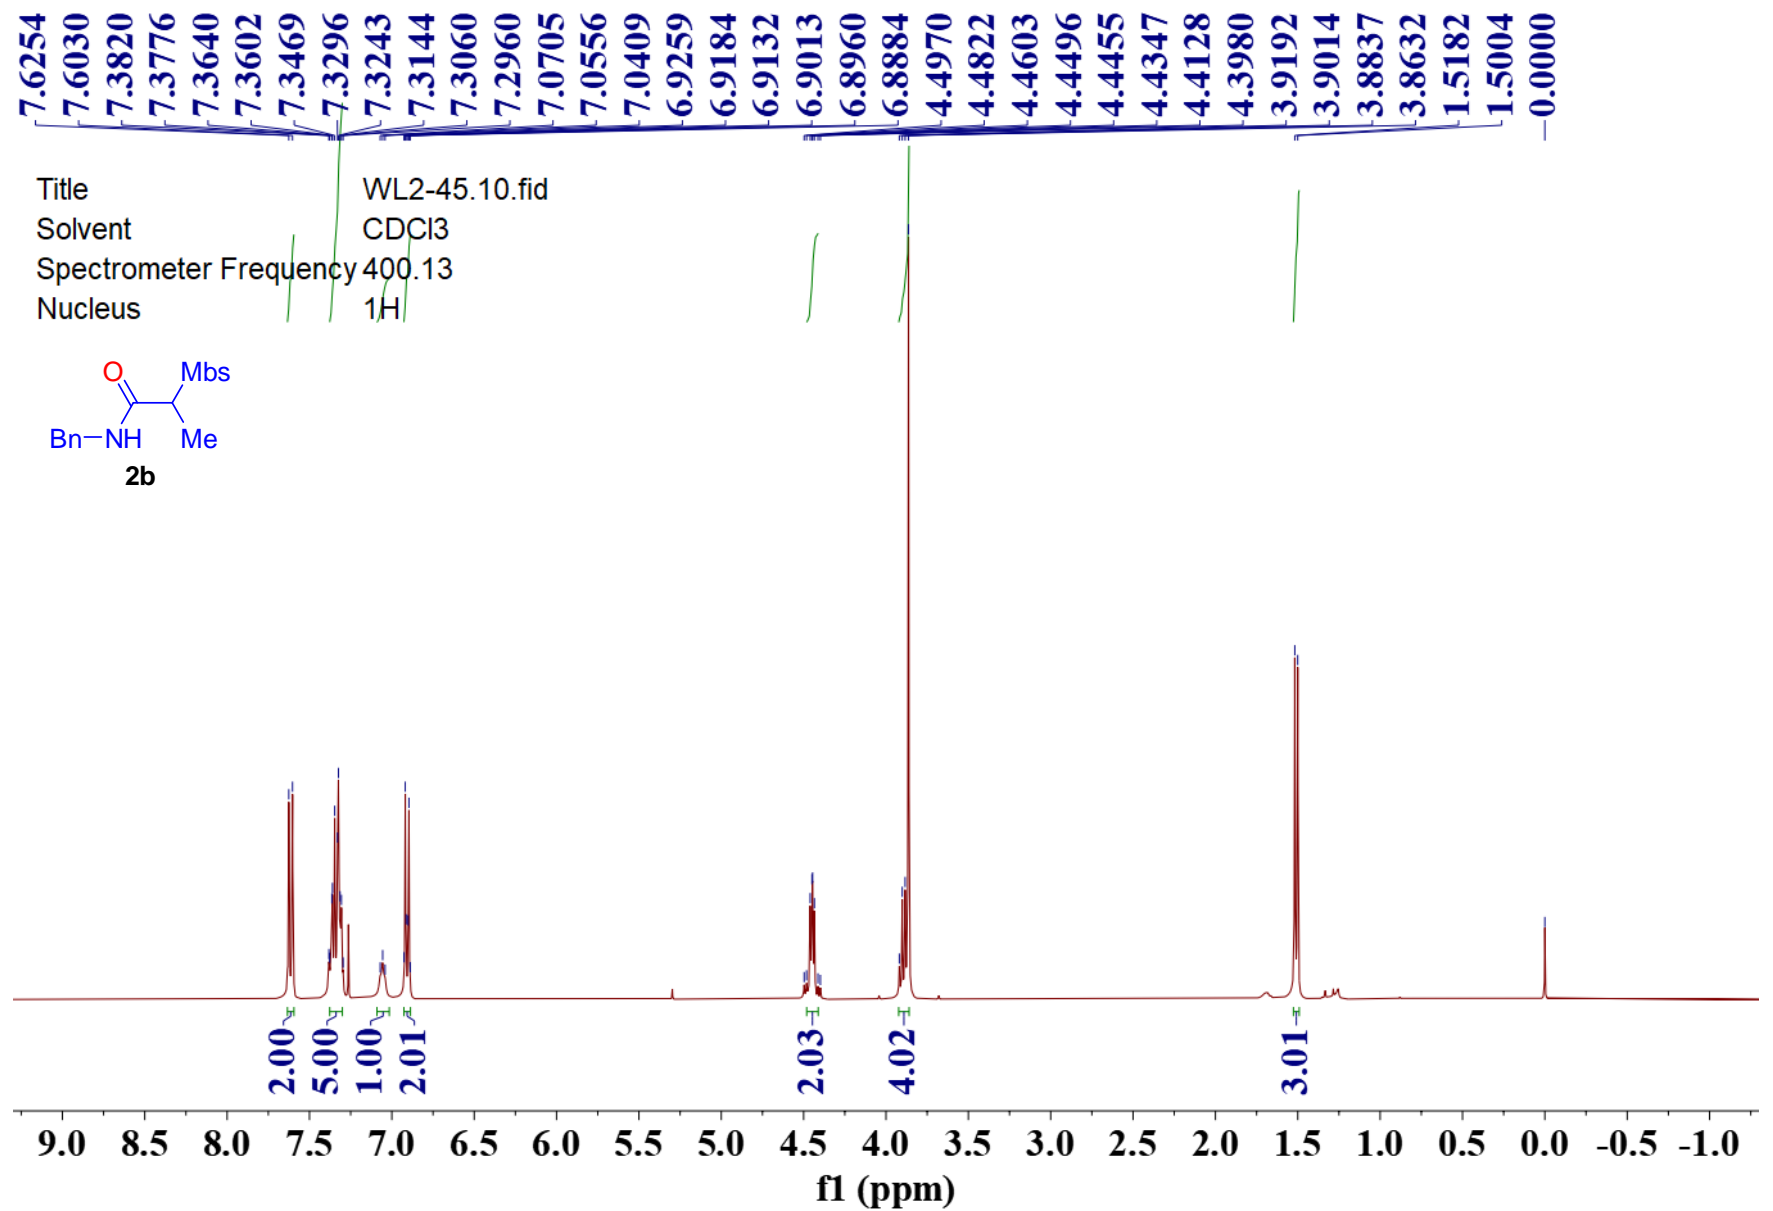

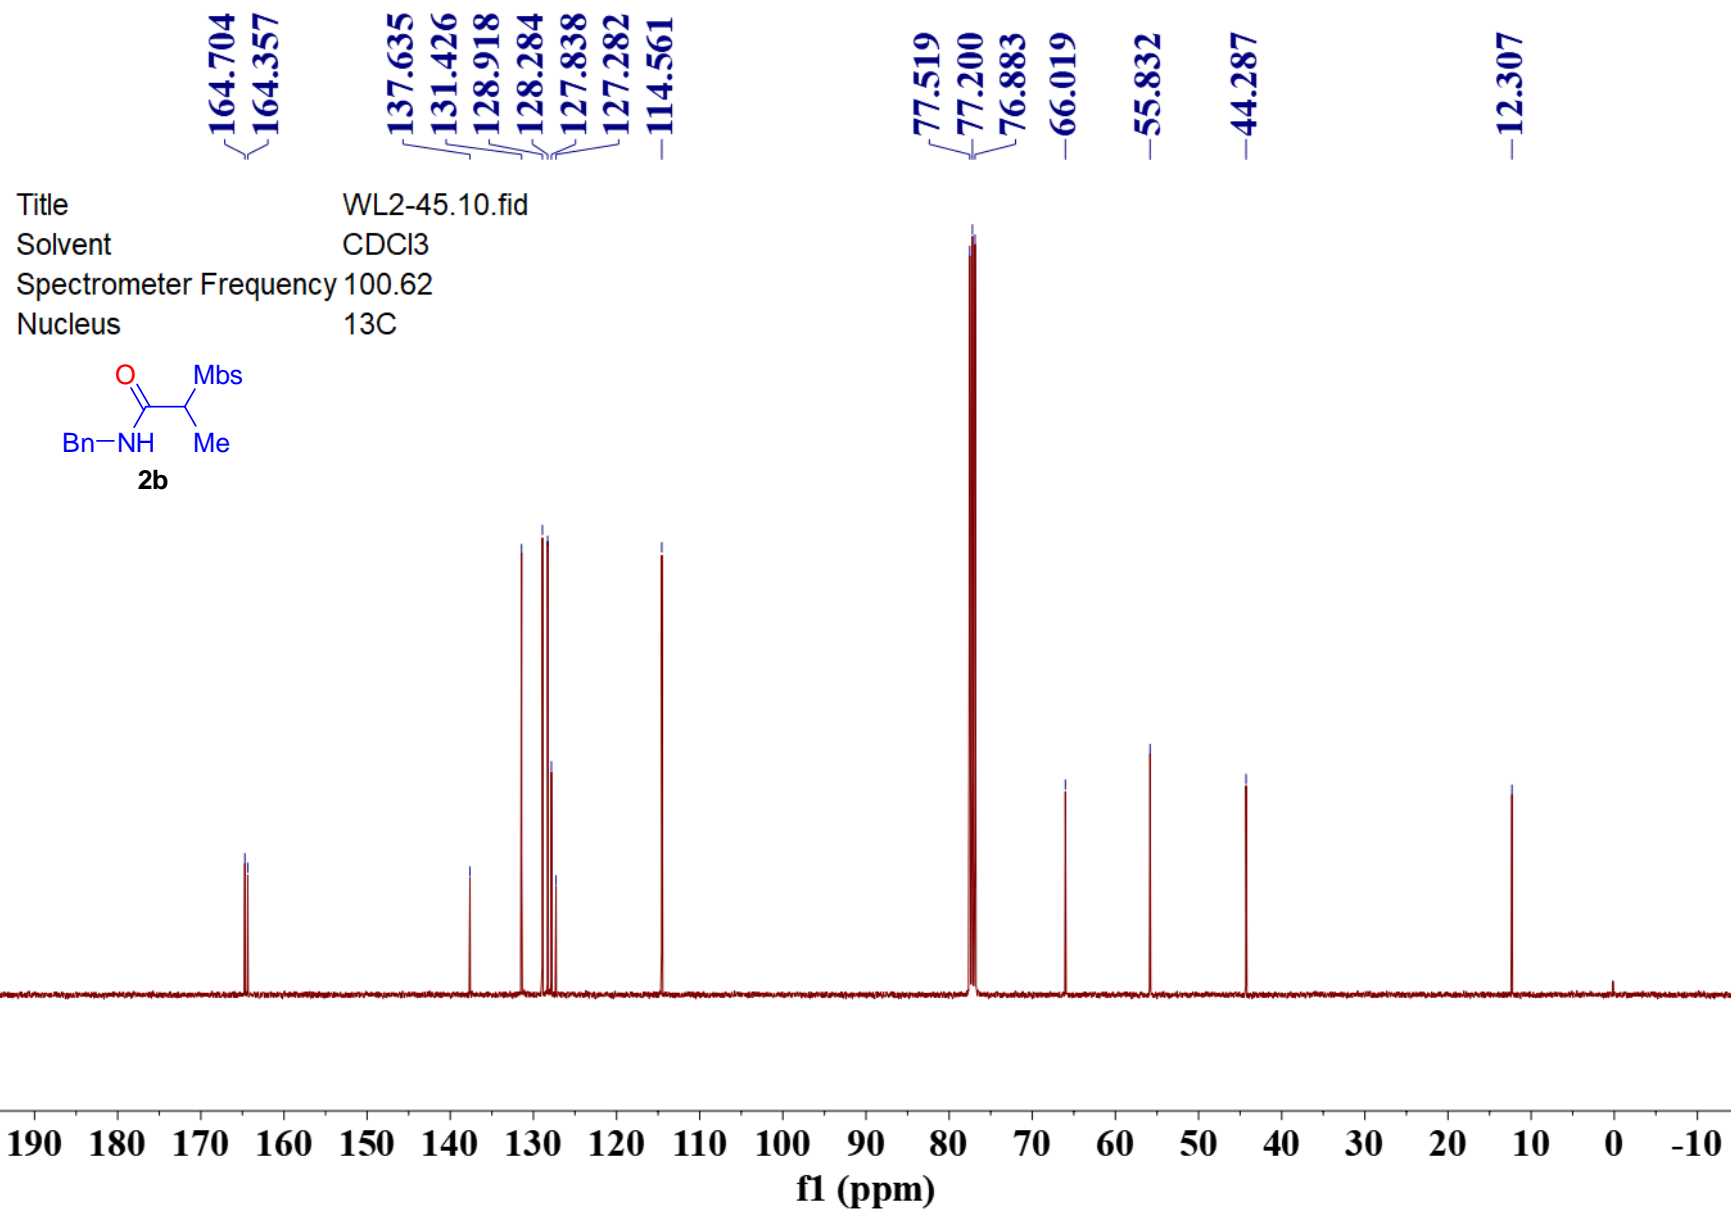

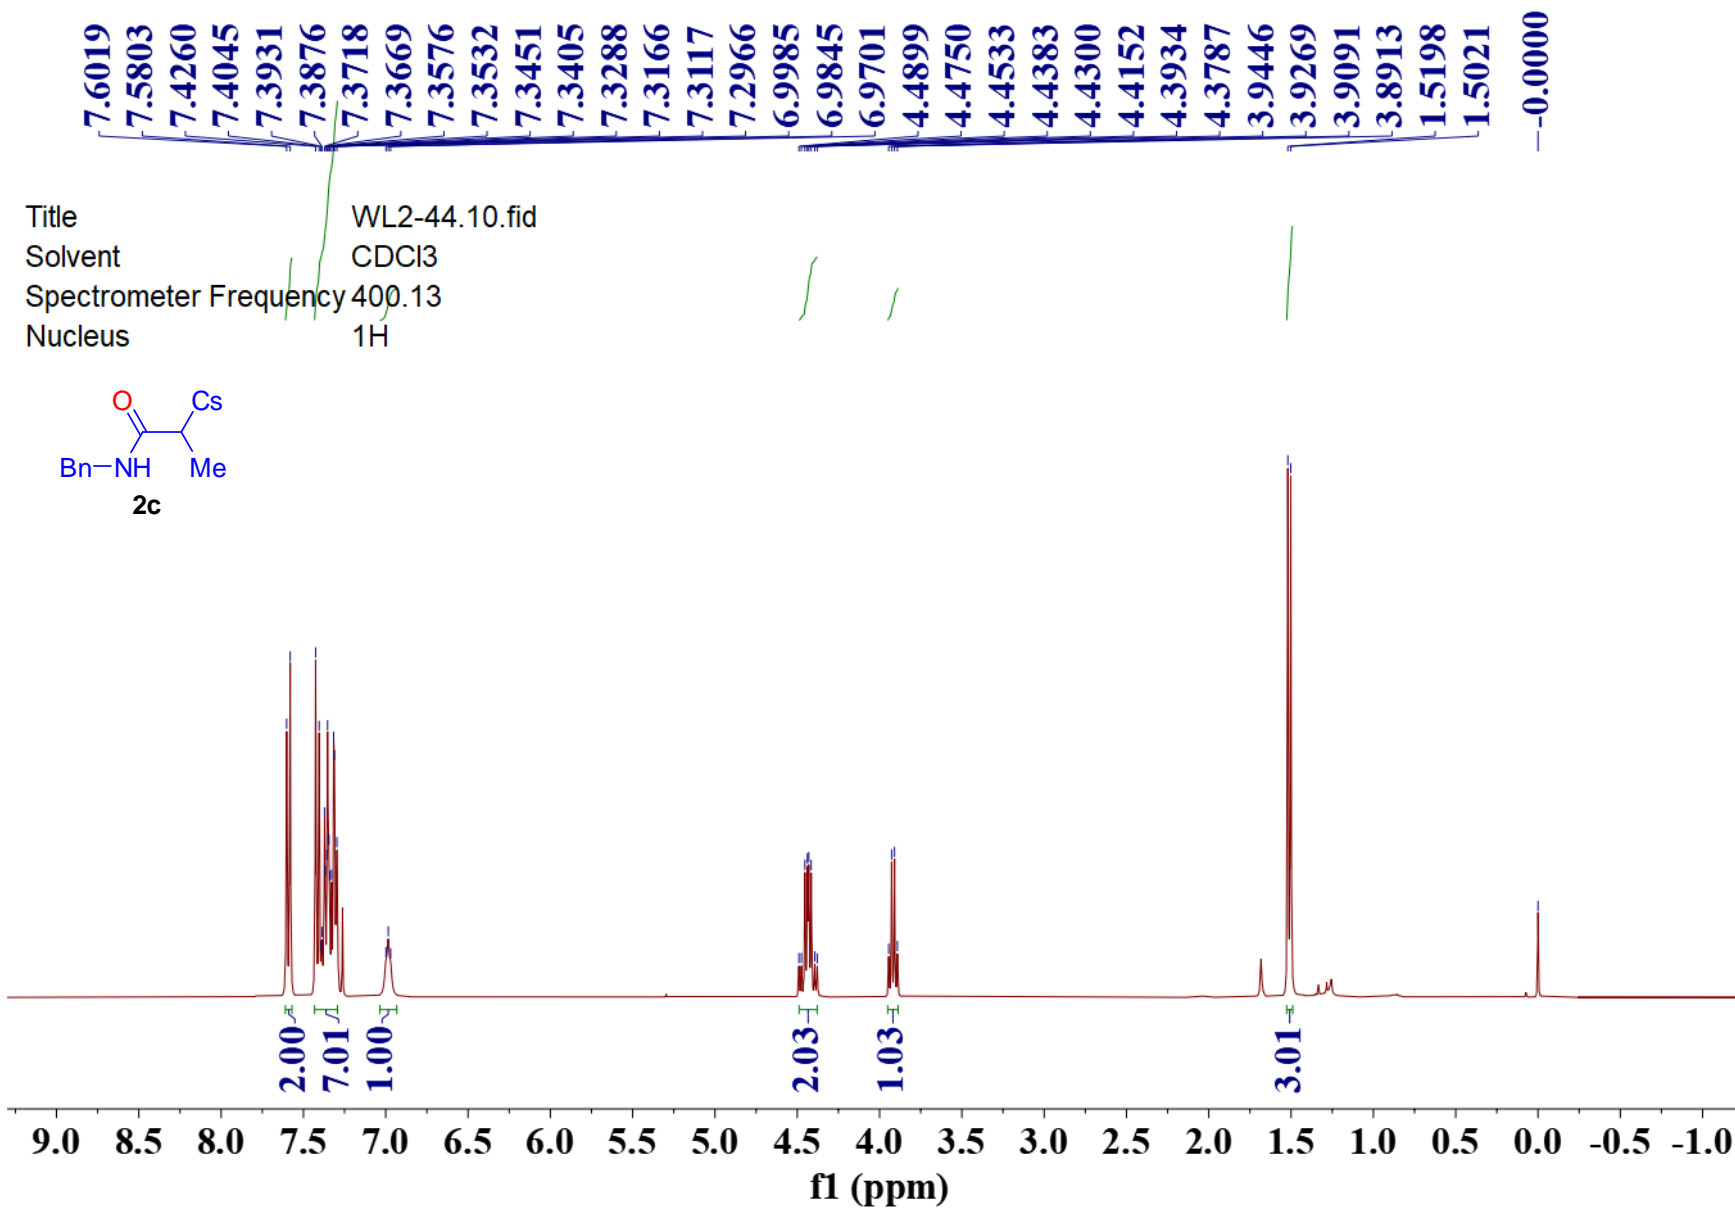



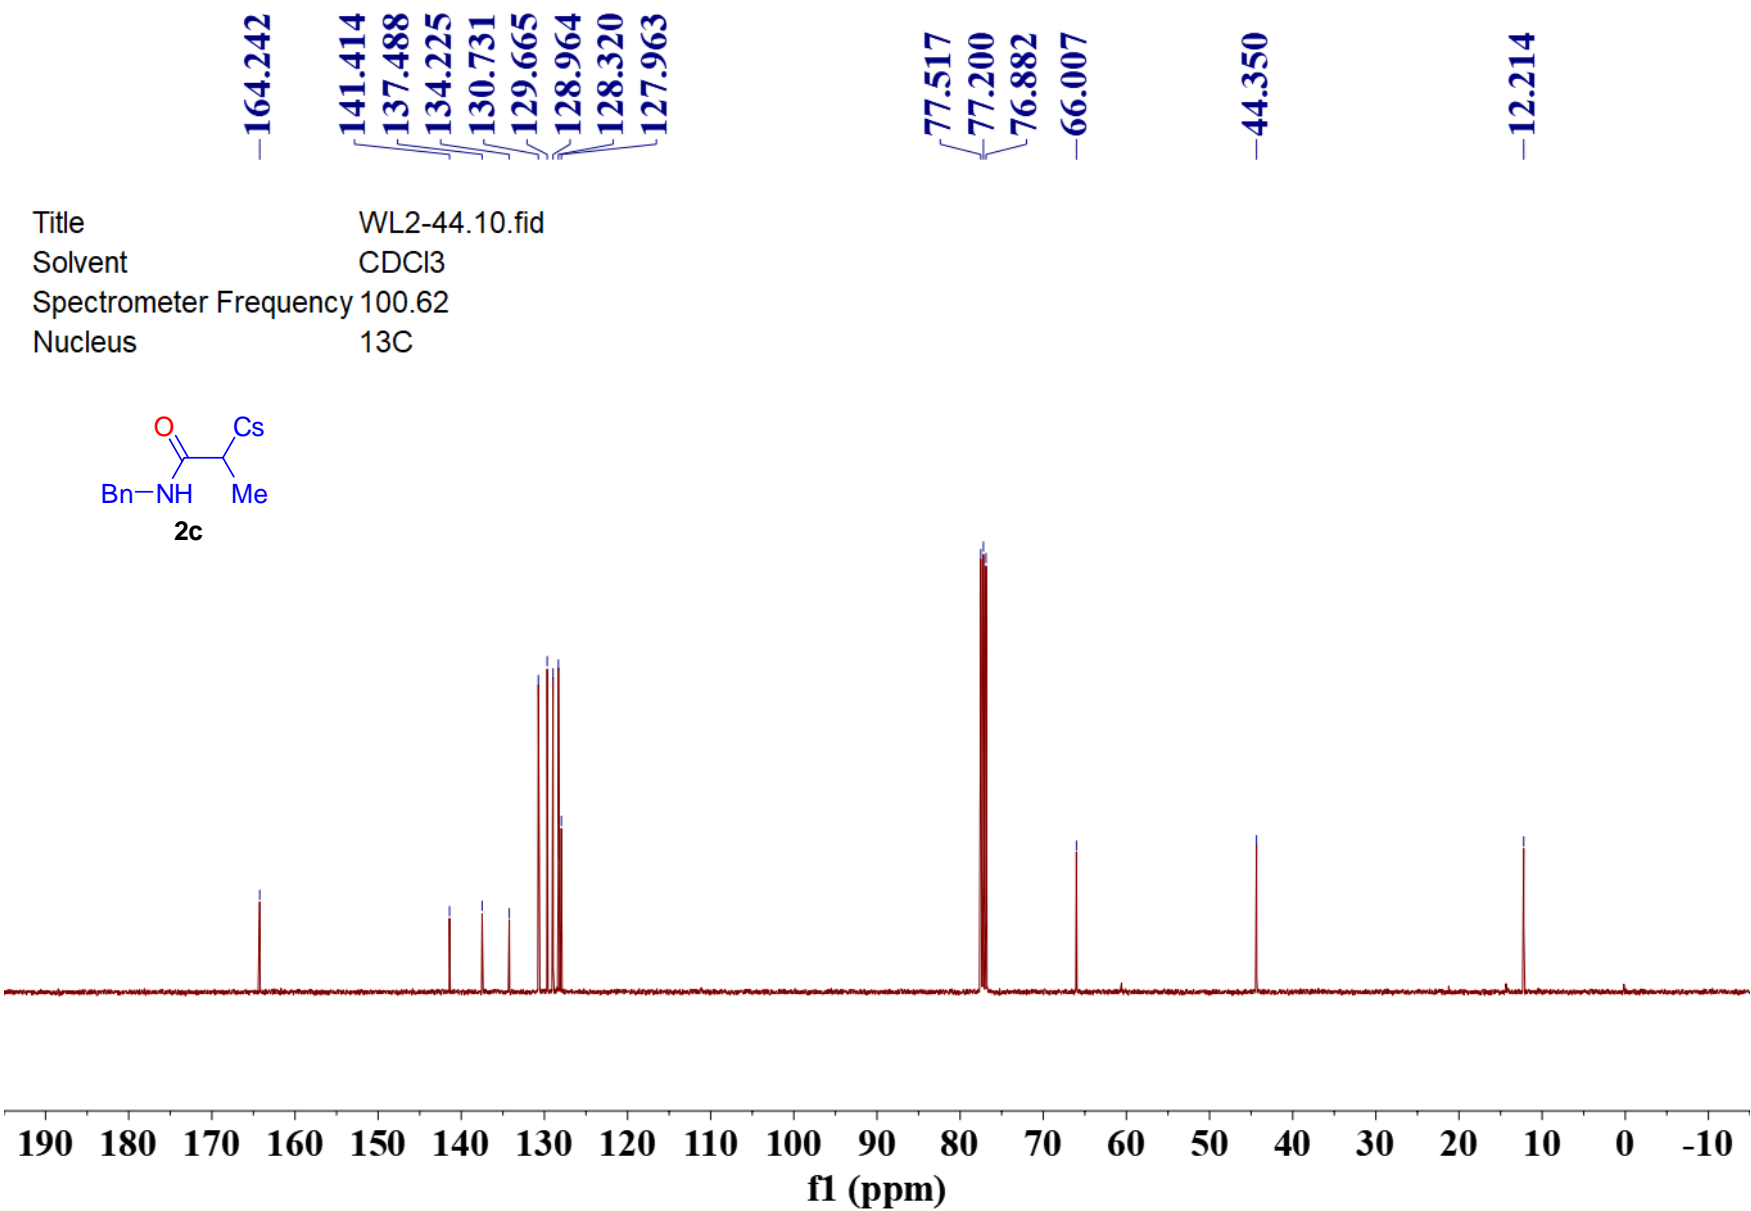

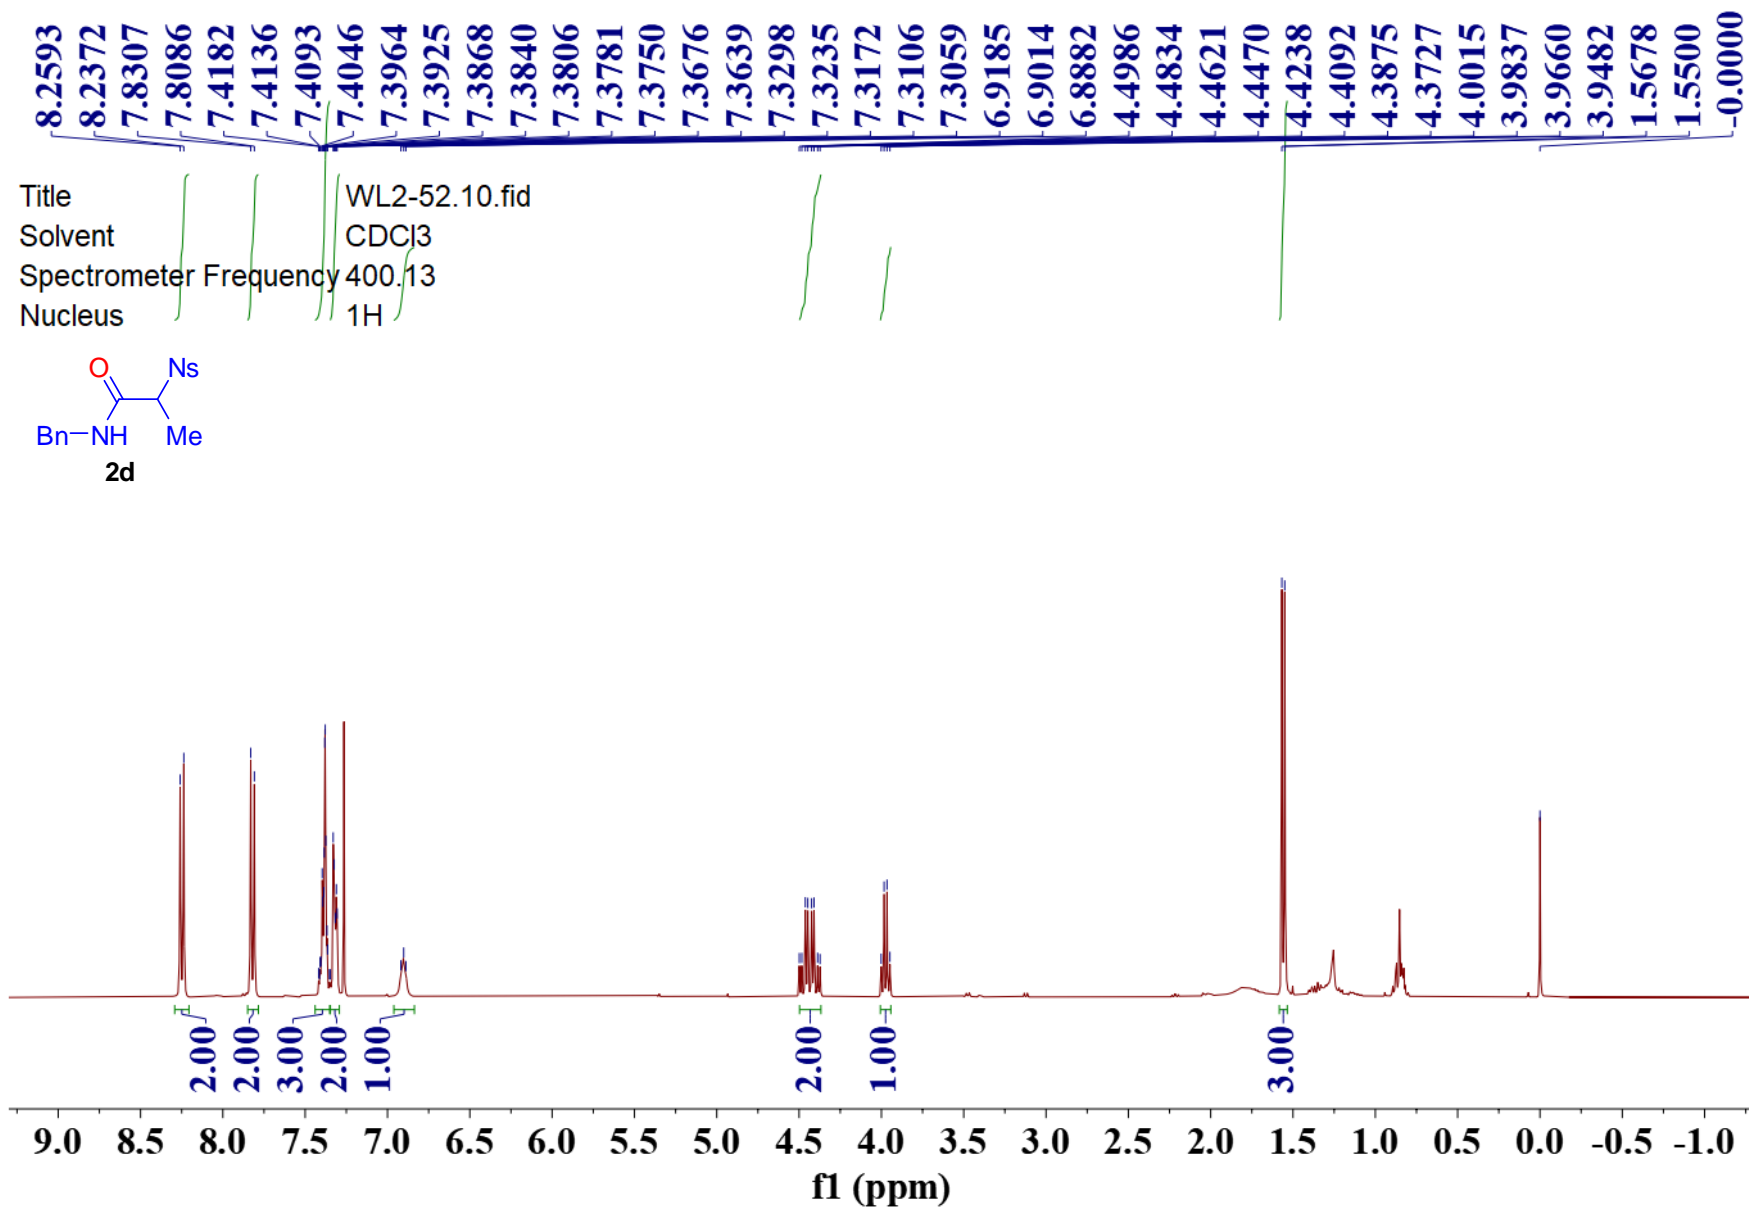

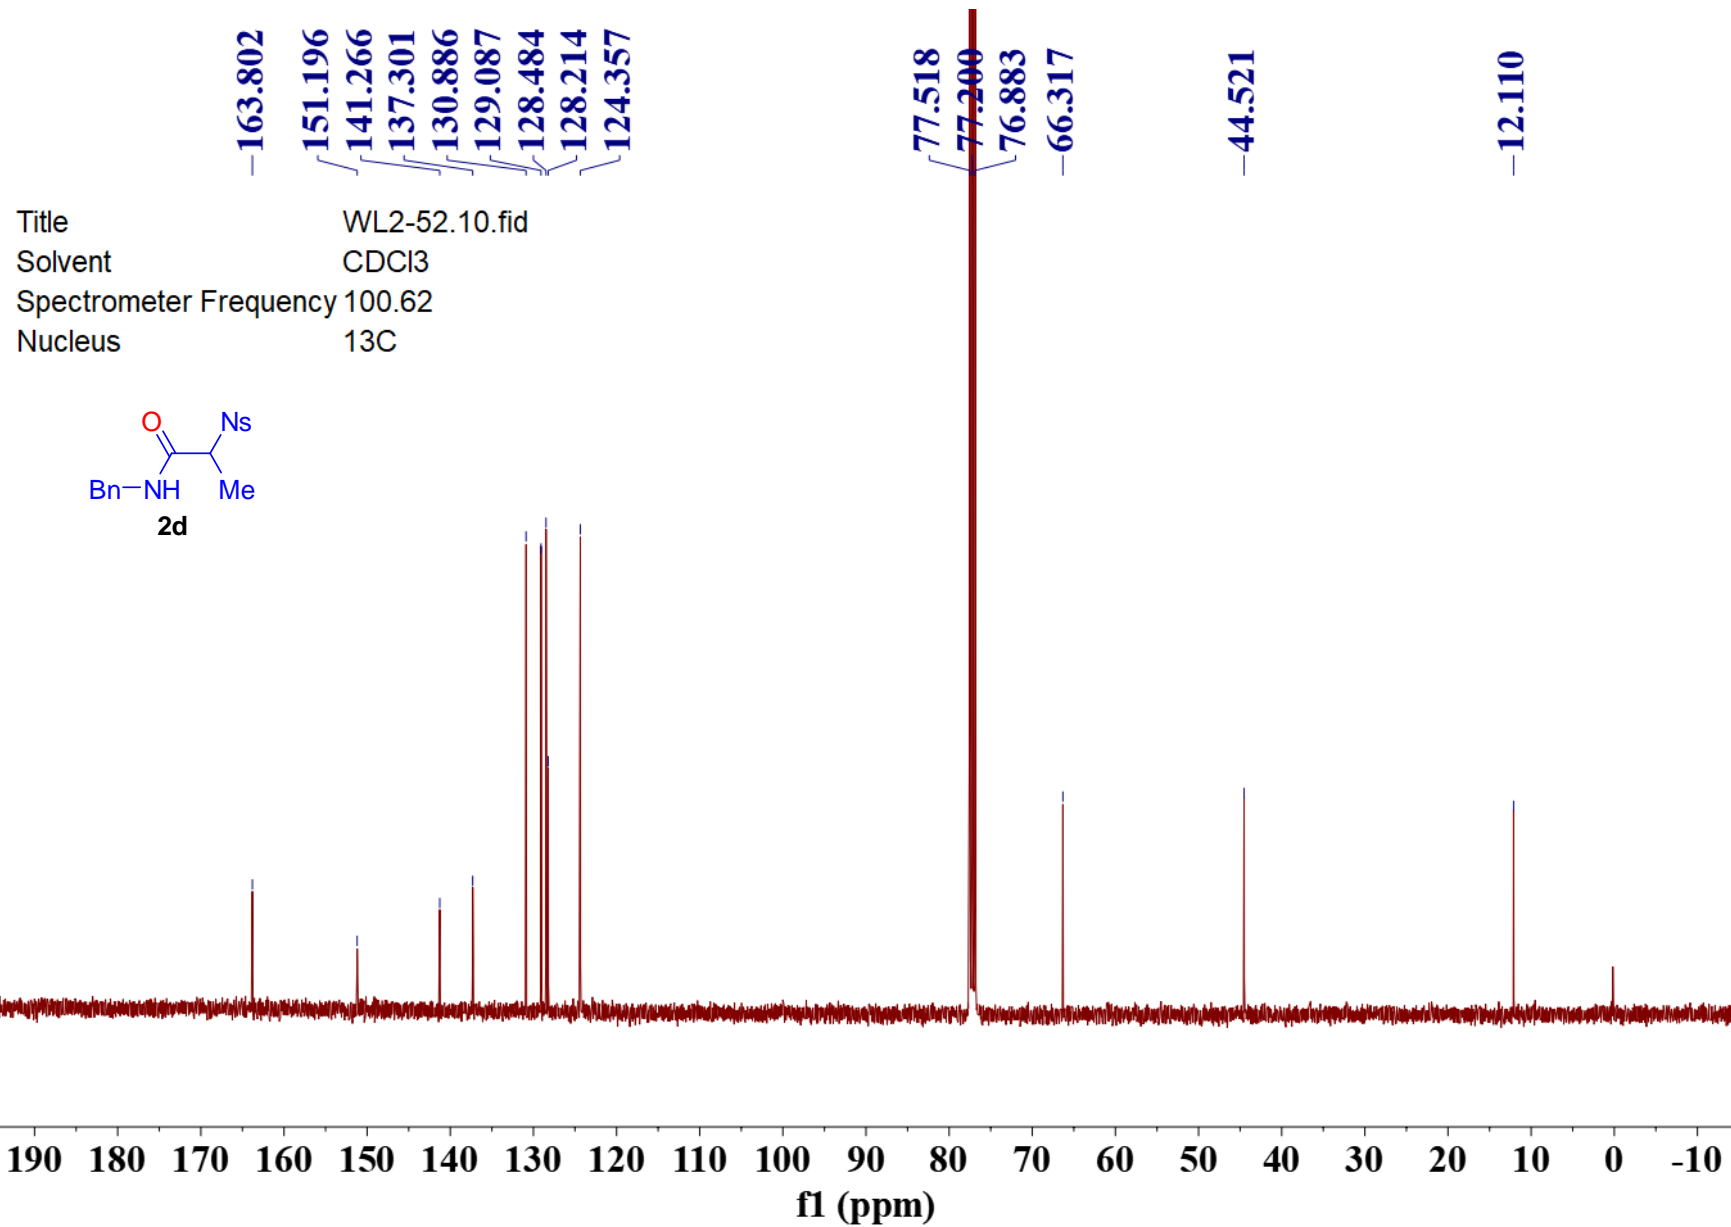

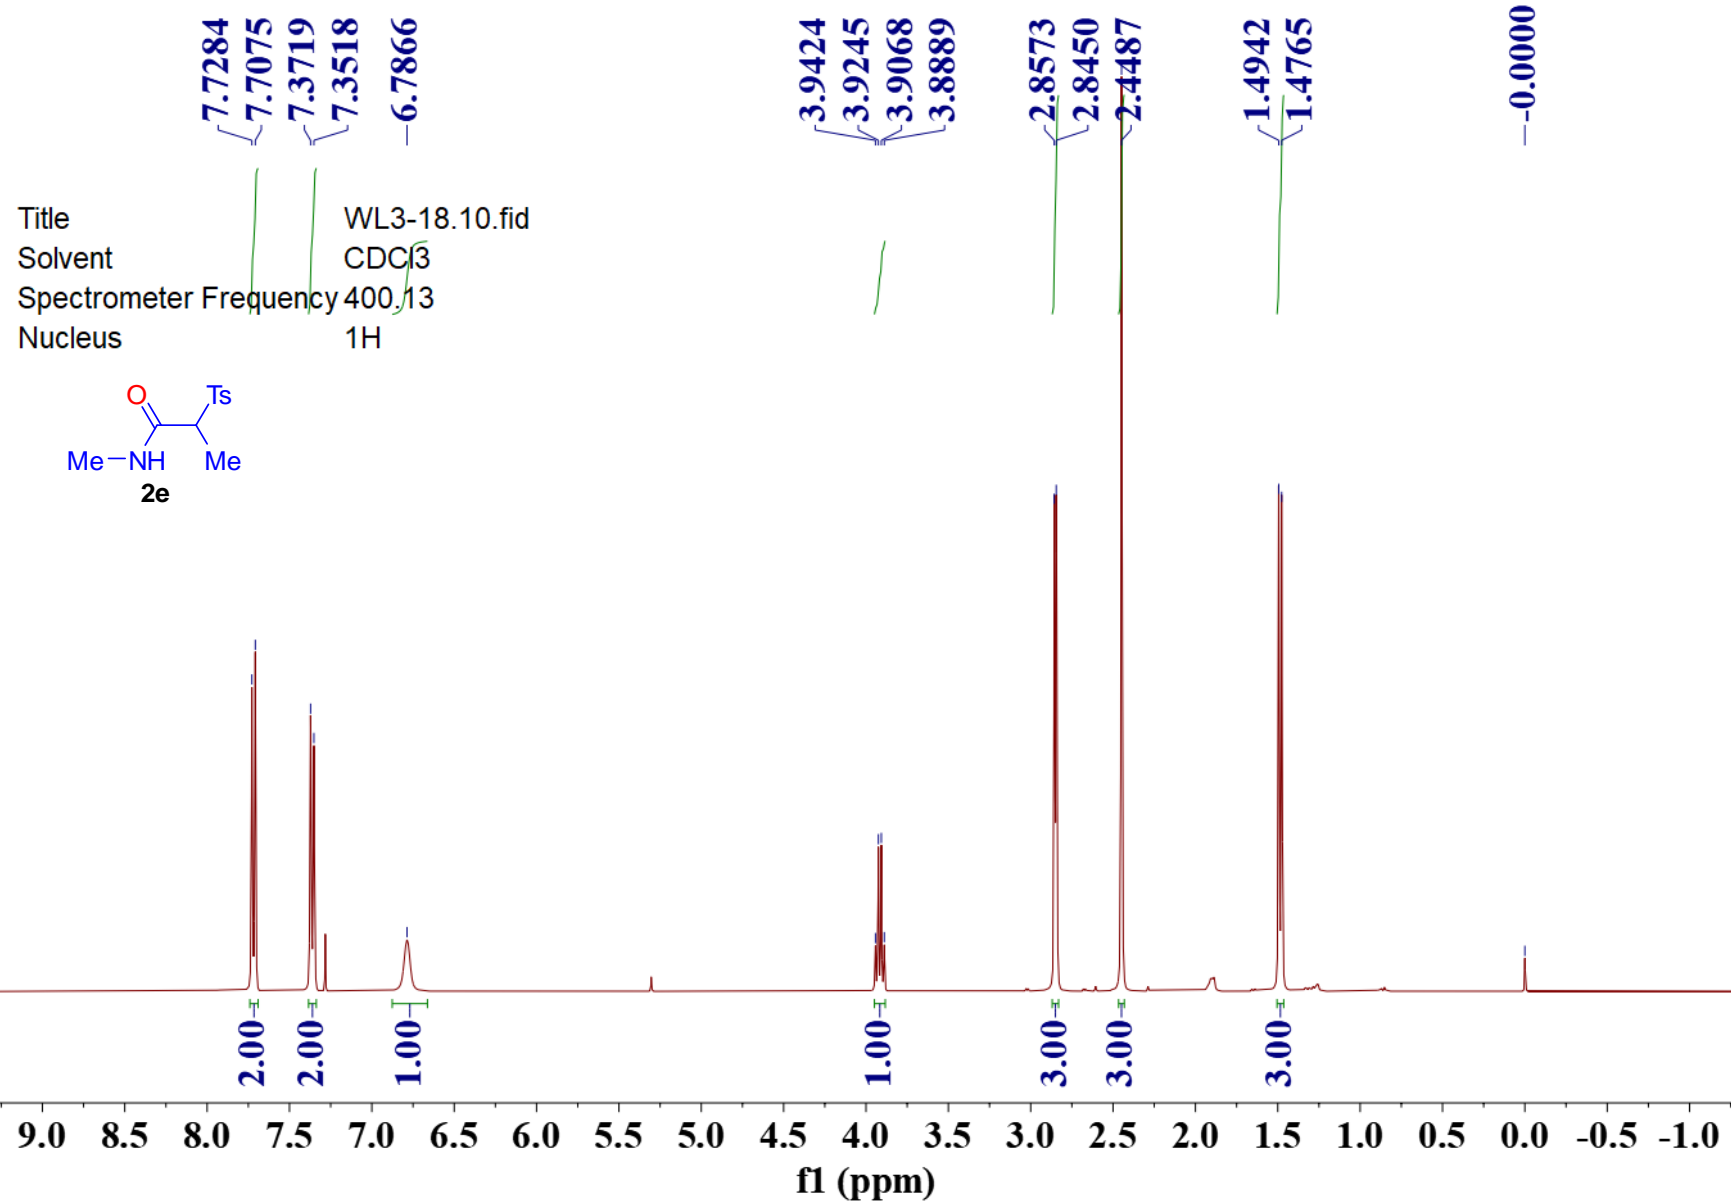

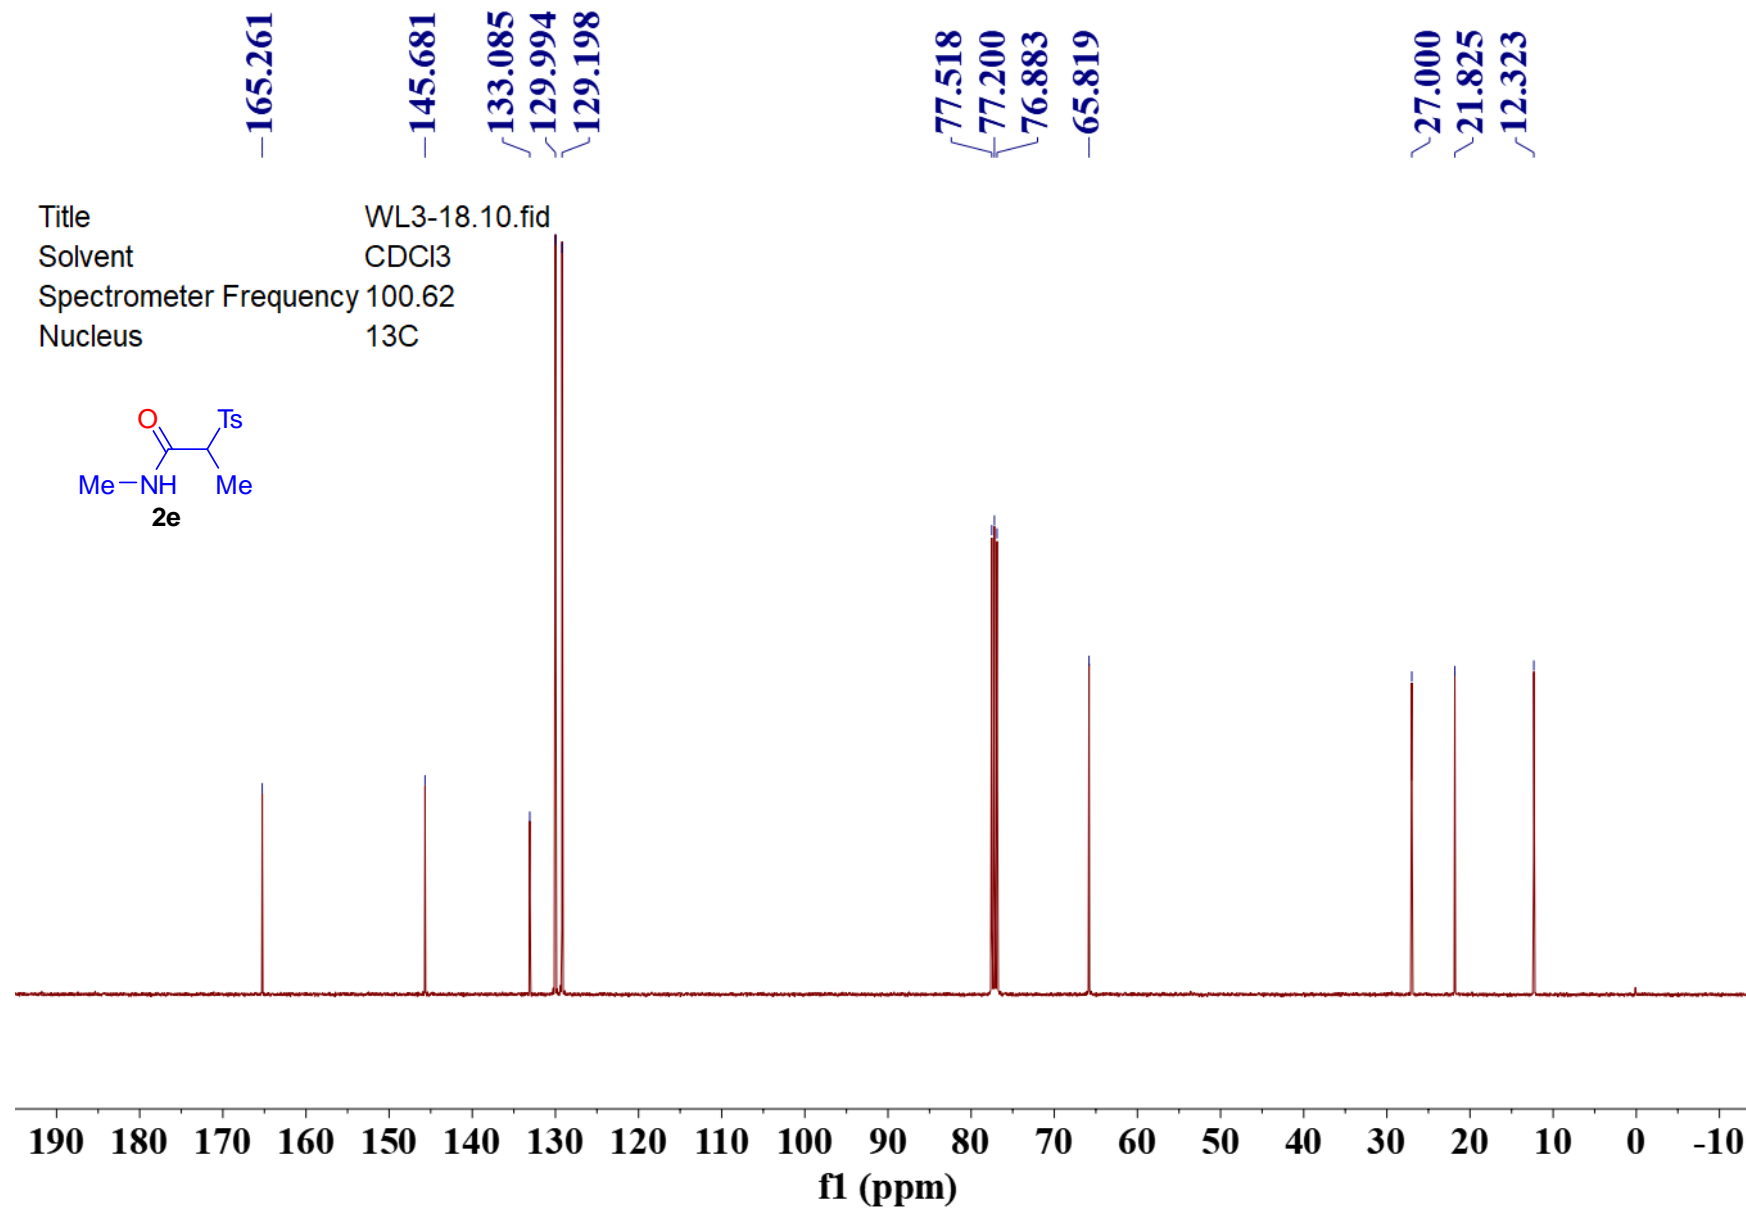

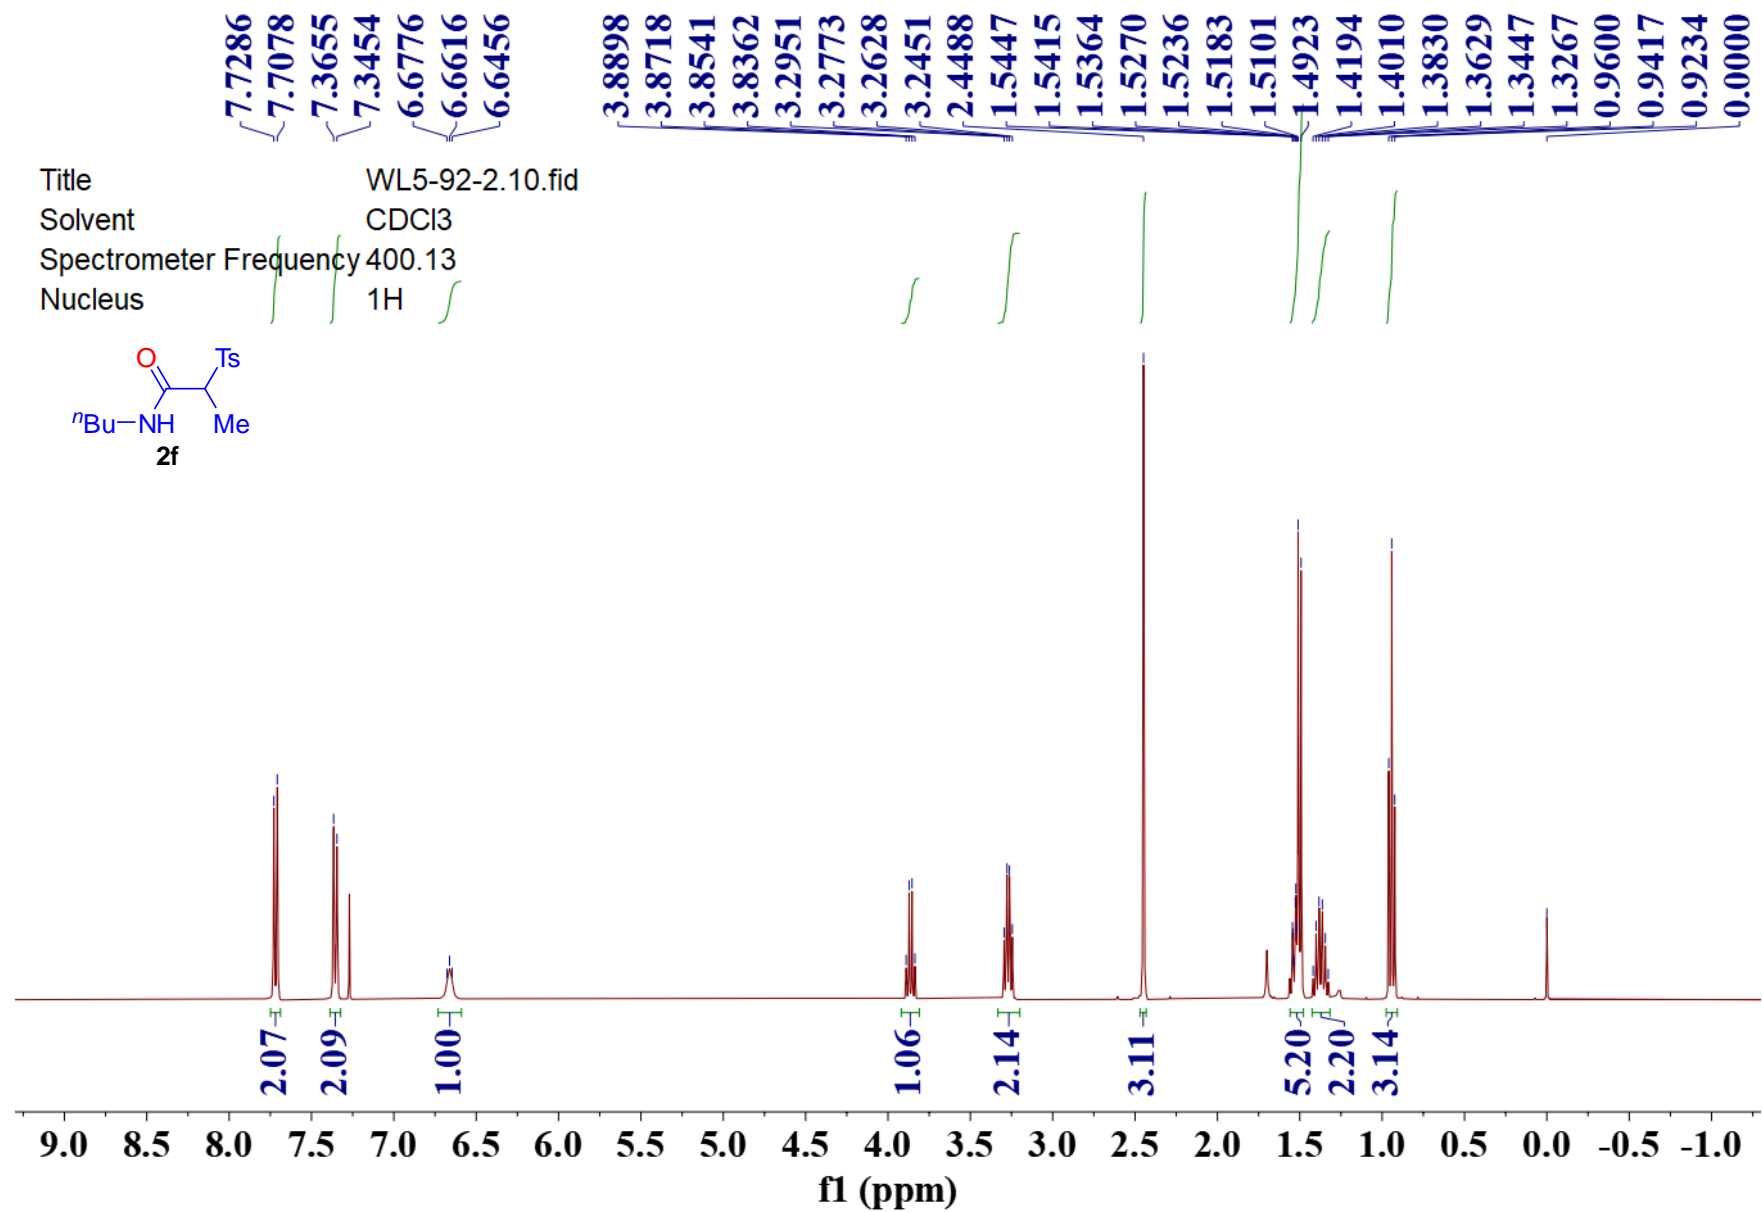

164.563  
145.716  
133.289  
130.037  
129.191

77.519  
77.200  
76.883  
65.932

40.073  
31.457  
21.869  
20.207  
13.884  
12.332

Title WL5-92-2.20.fid  
Solvent CDCl3  
Spectrometer Frequency 100.62  
Nucleus 13C

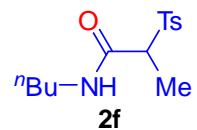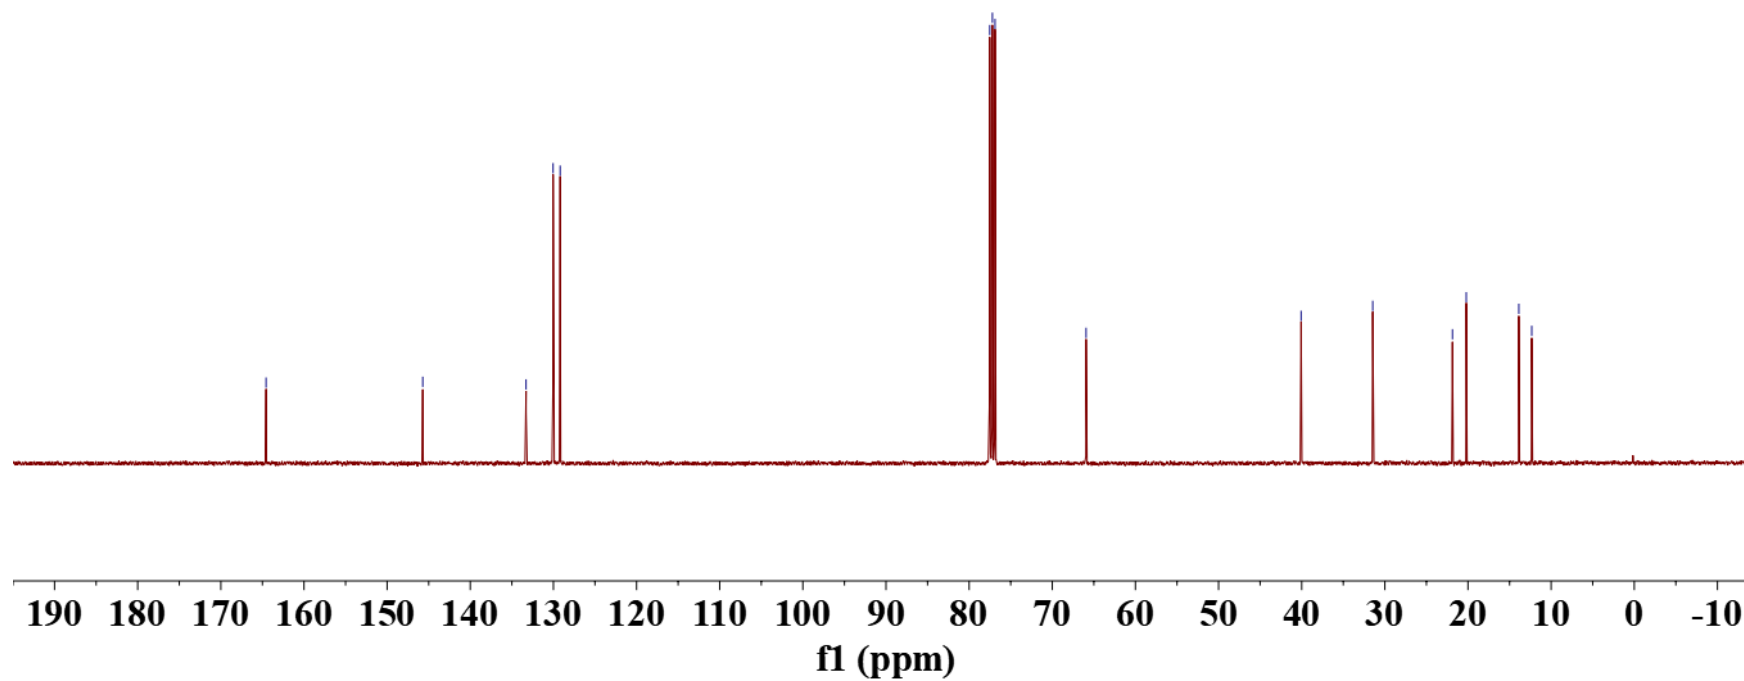

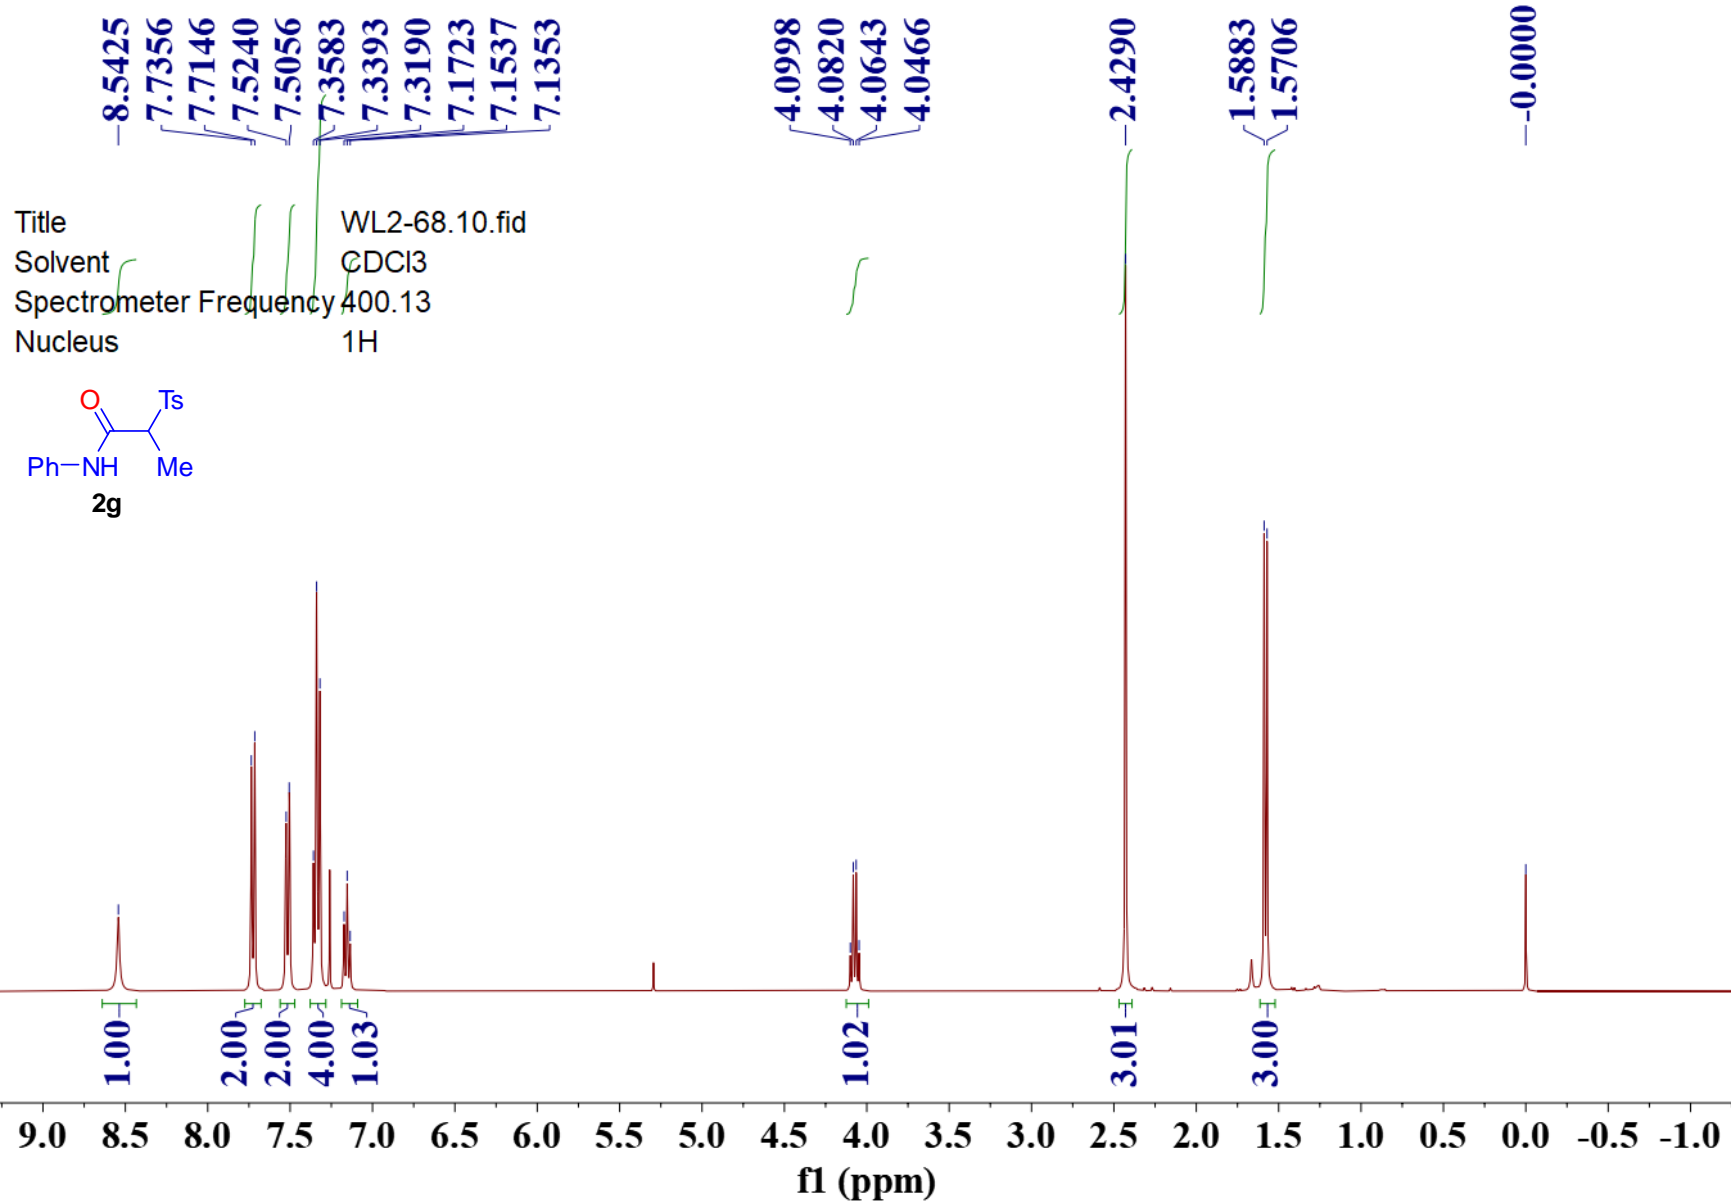



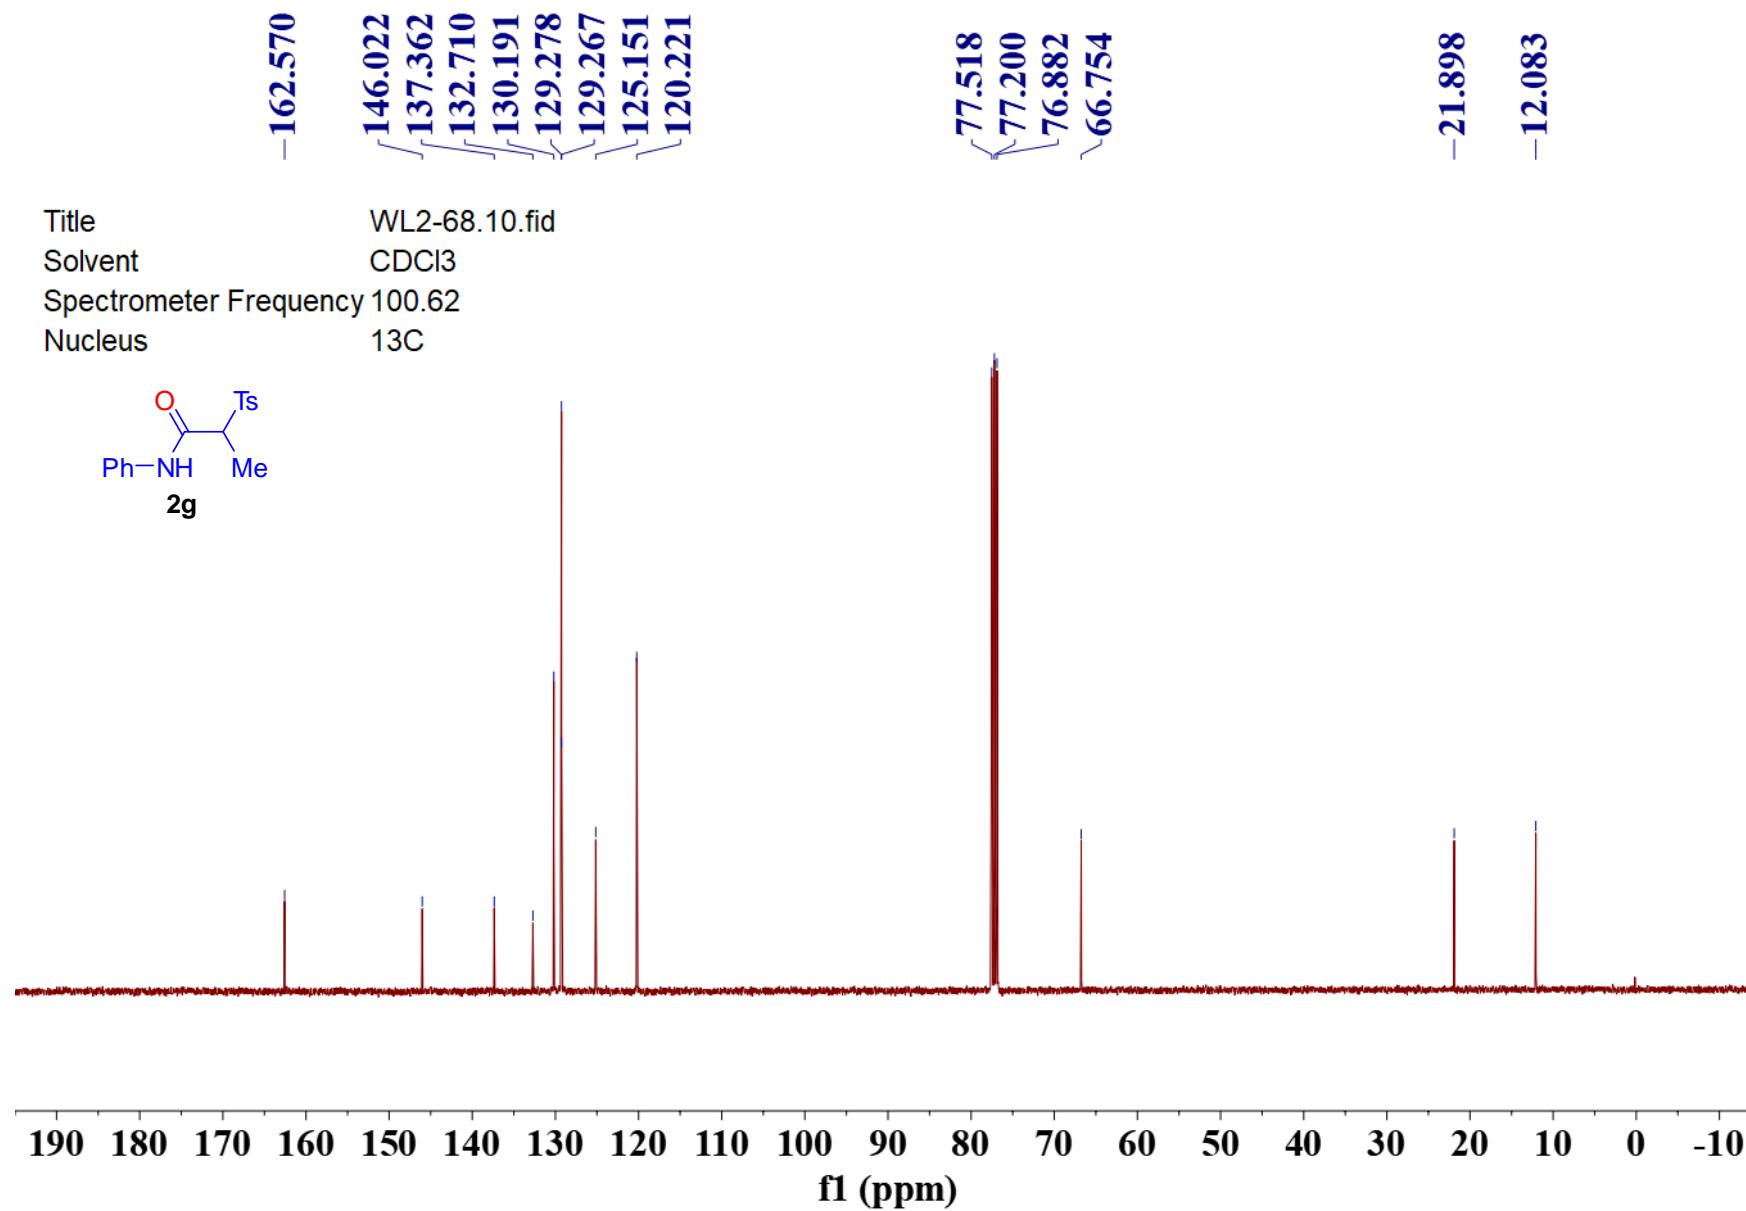

S100

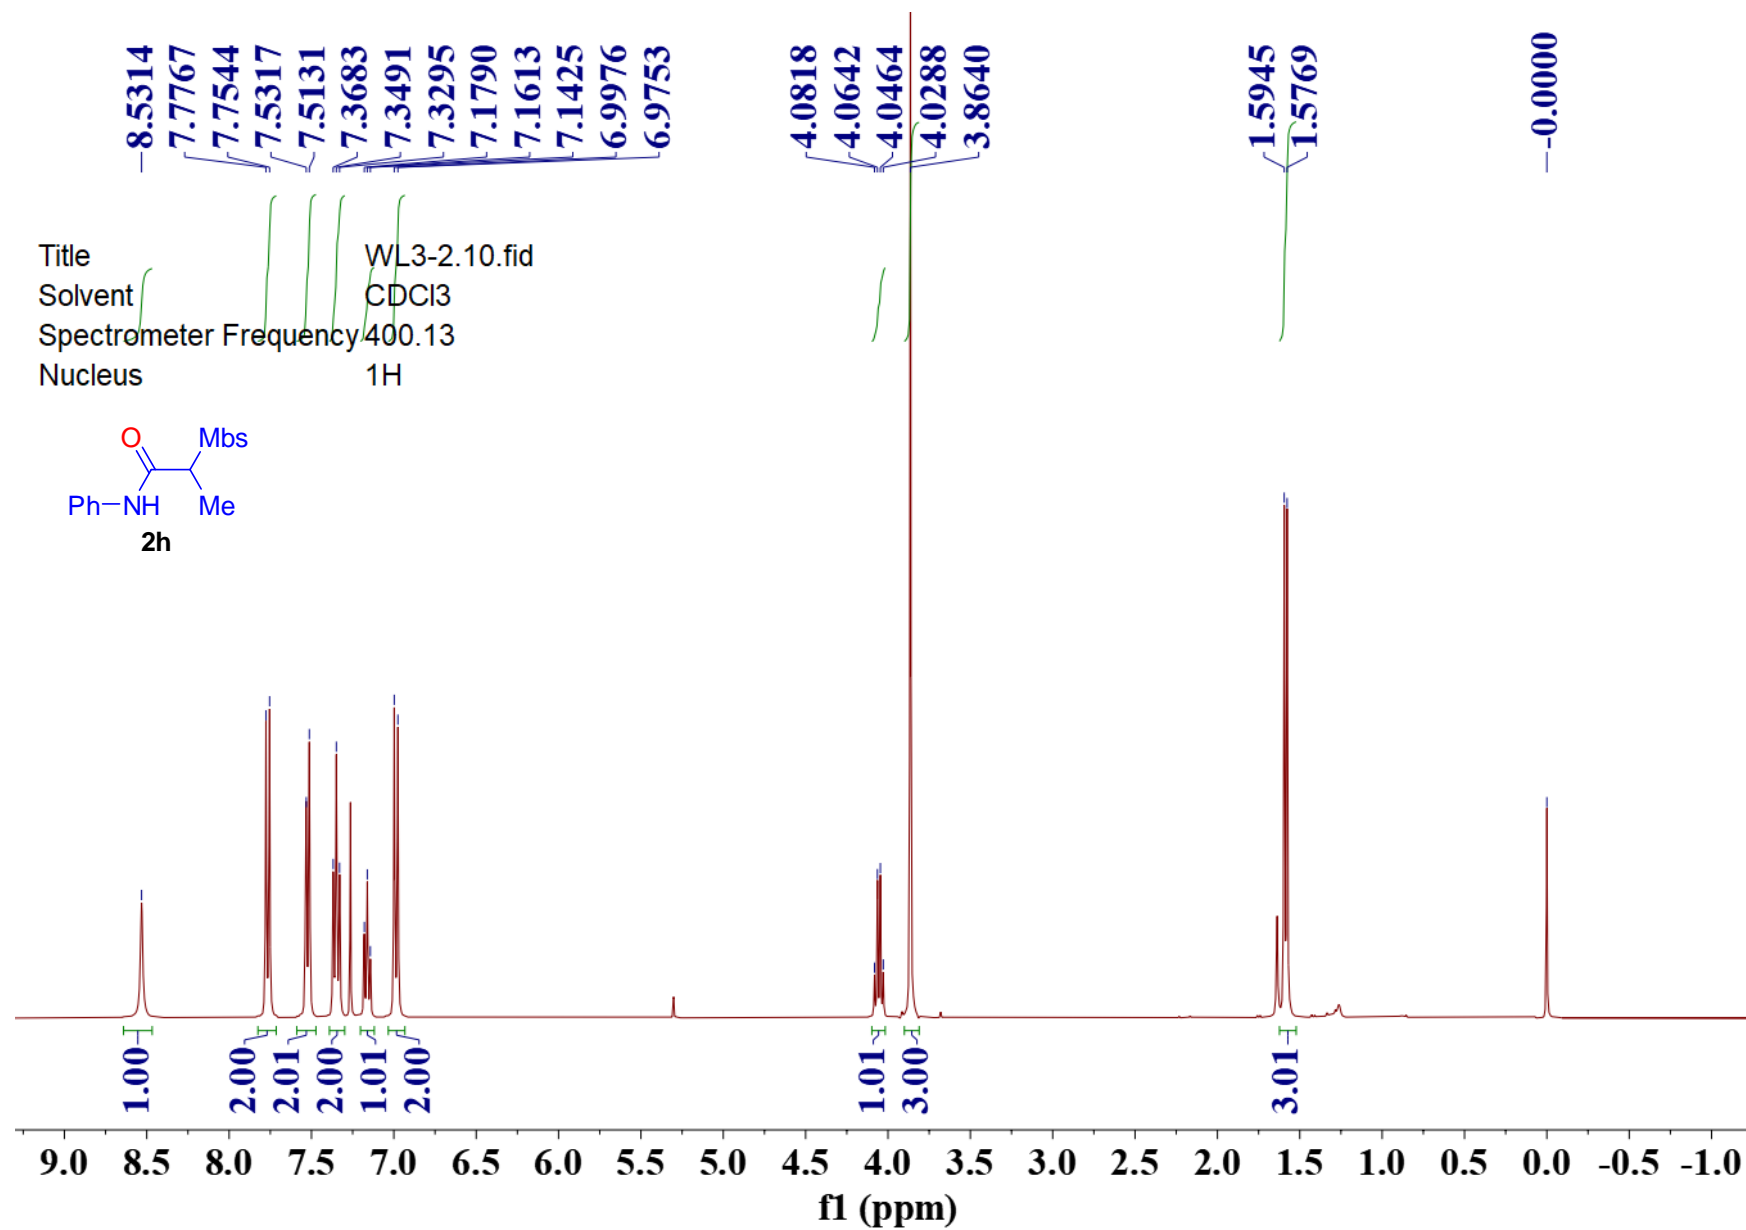

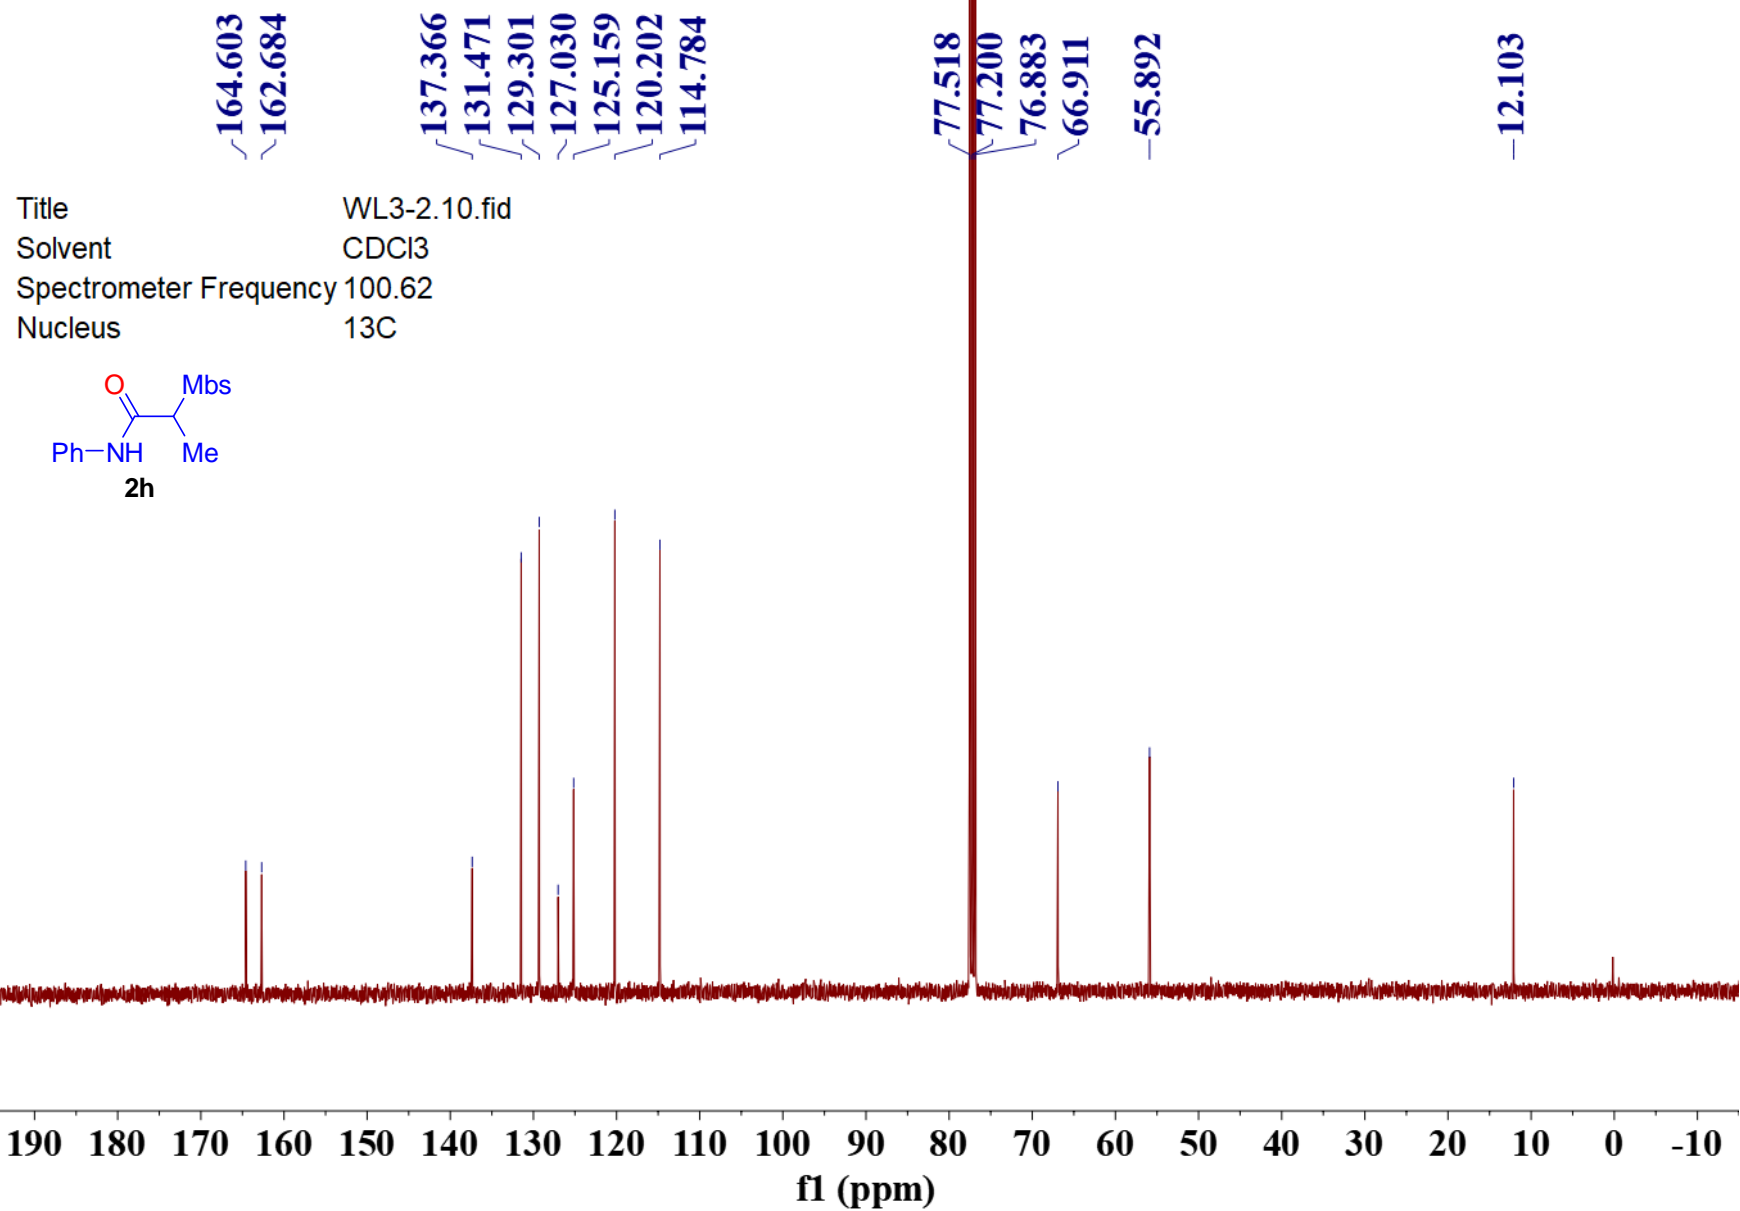

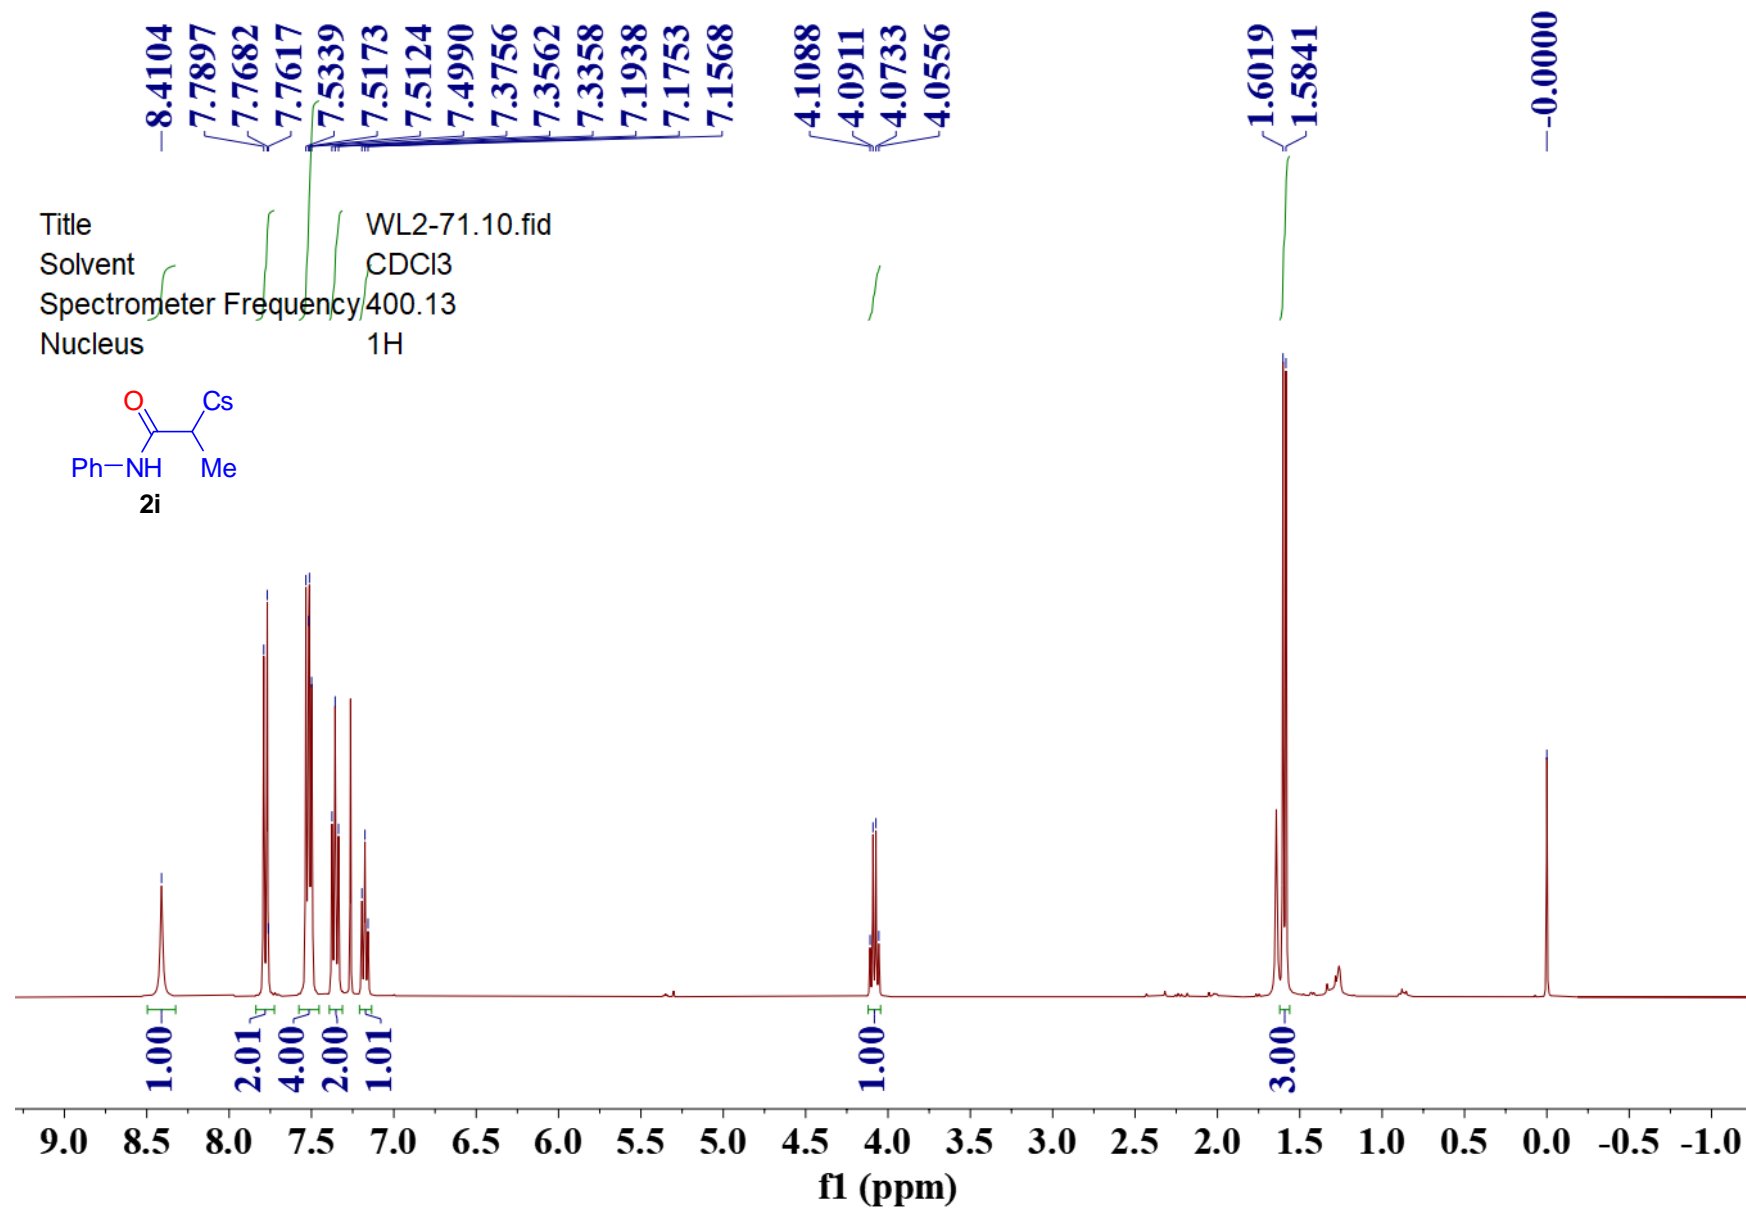

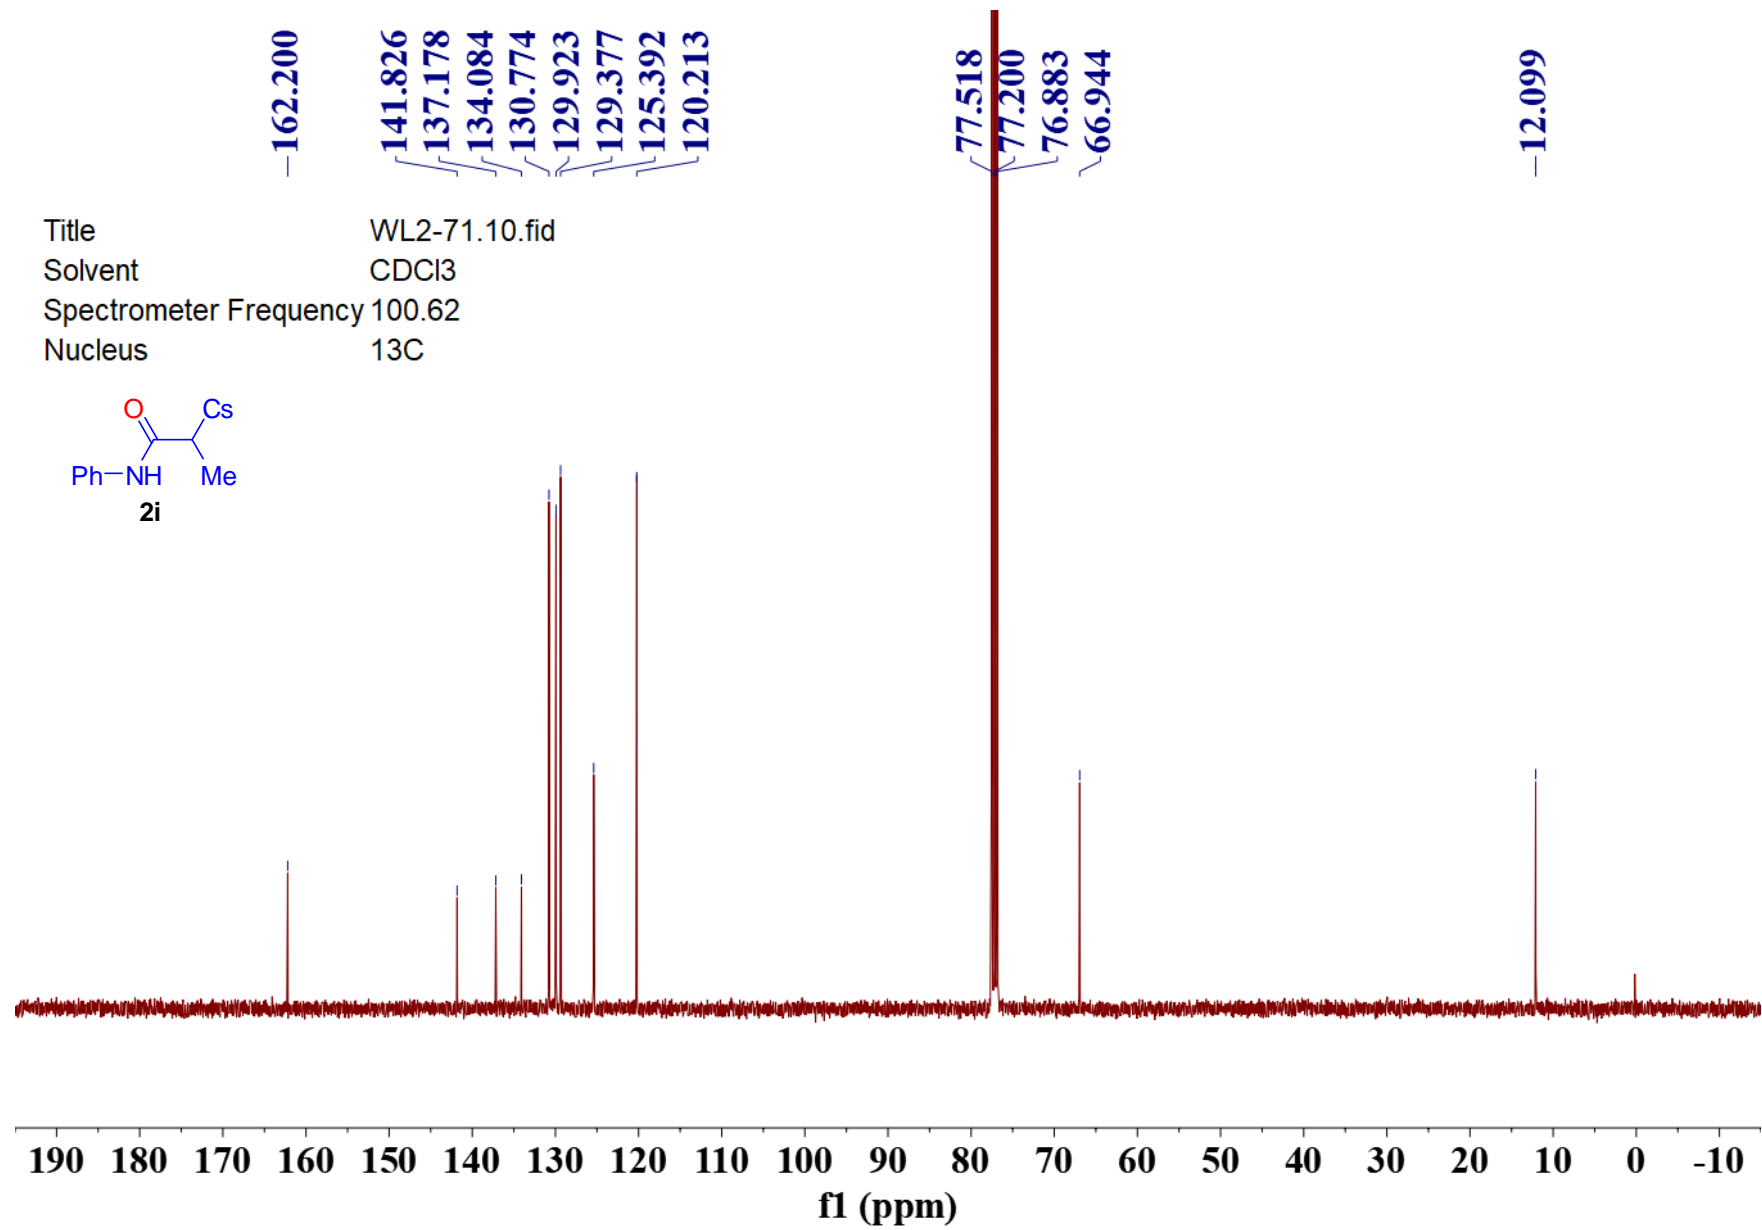

S104

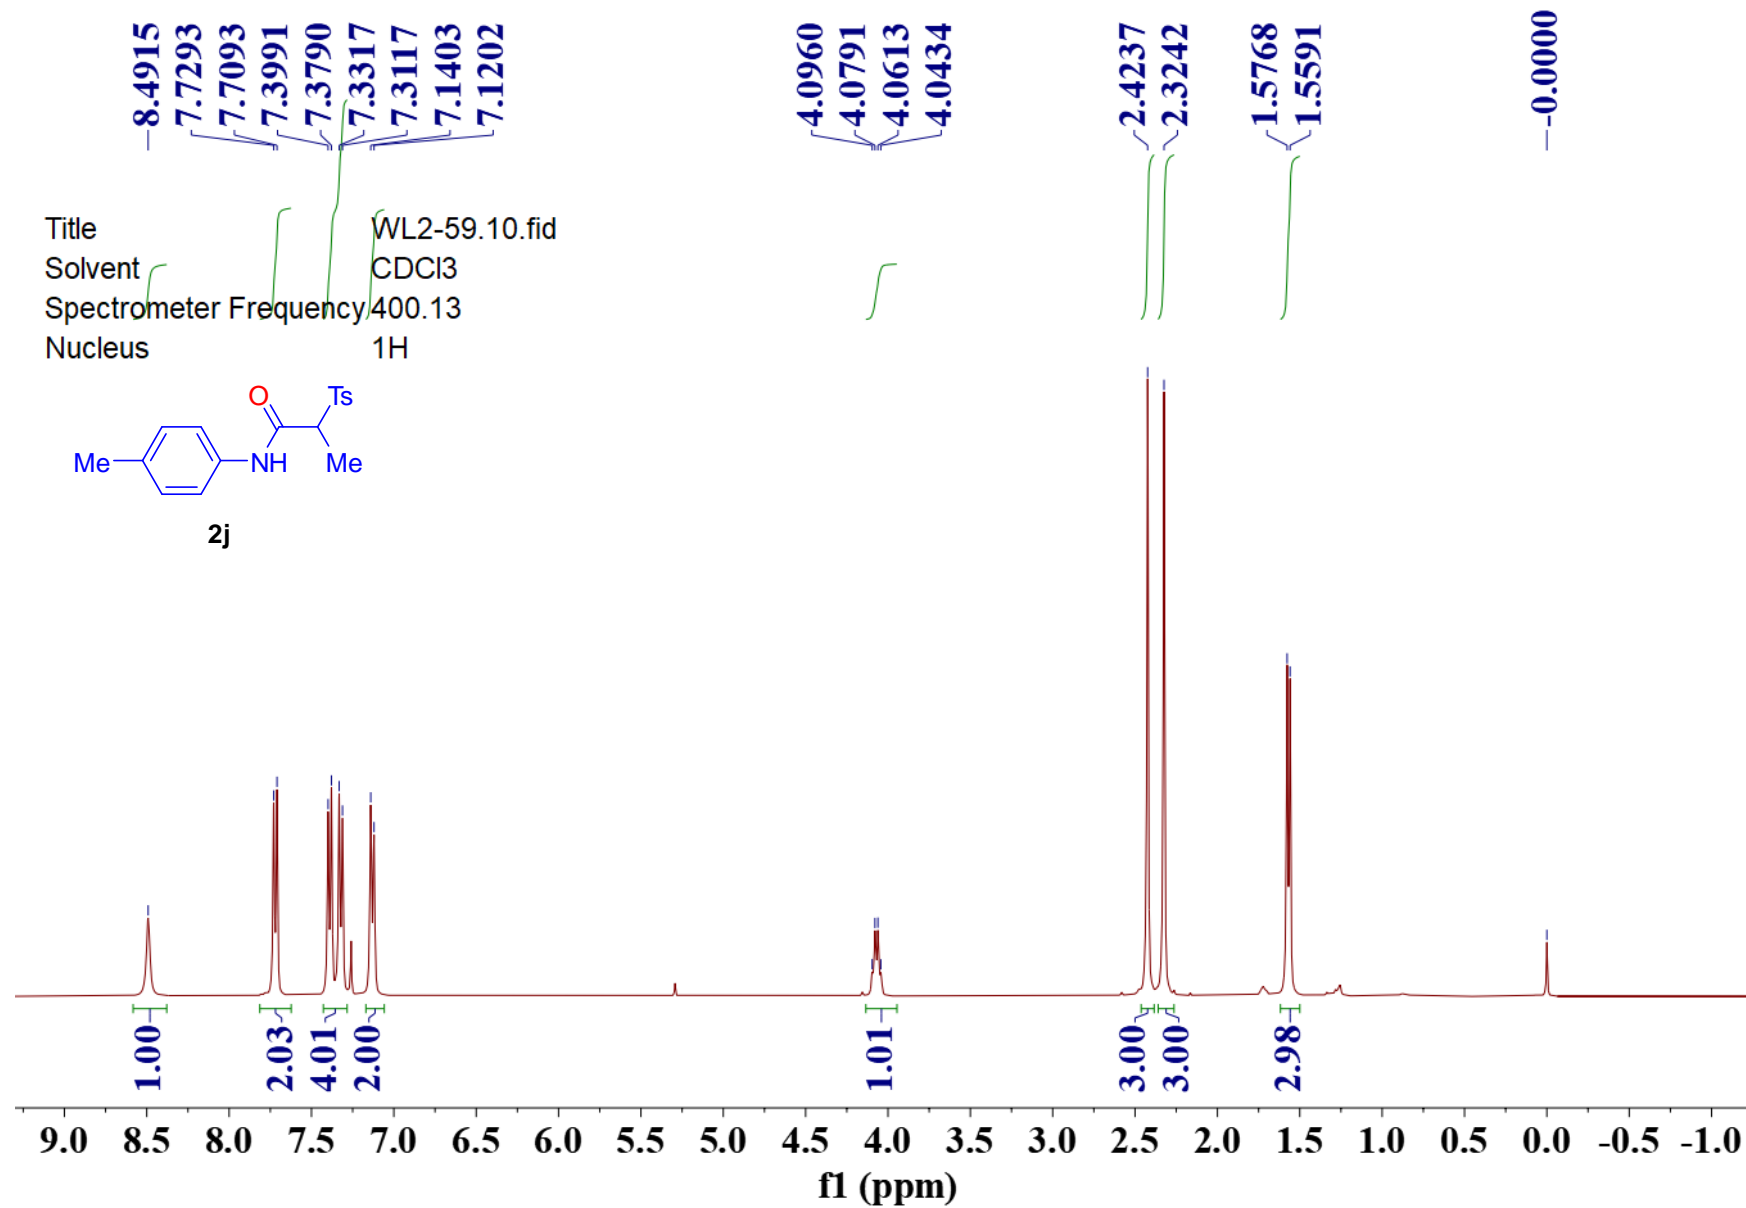

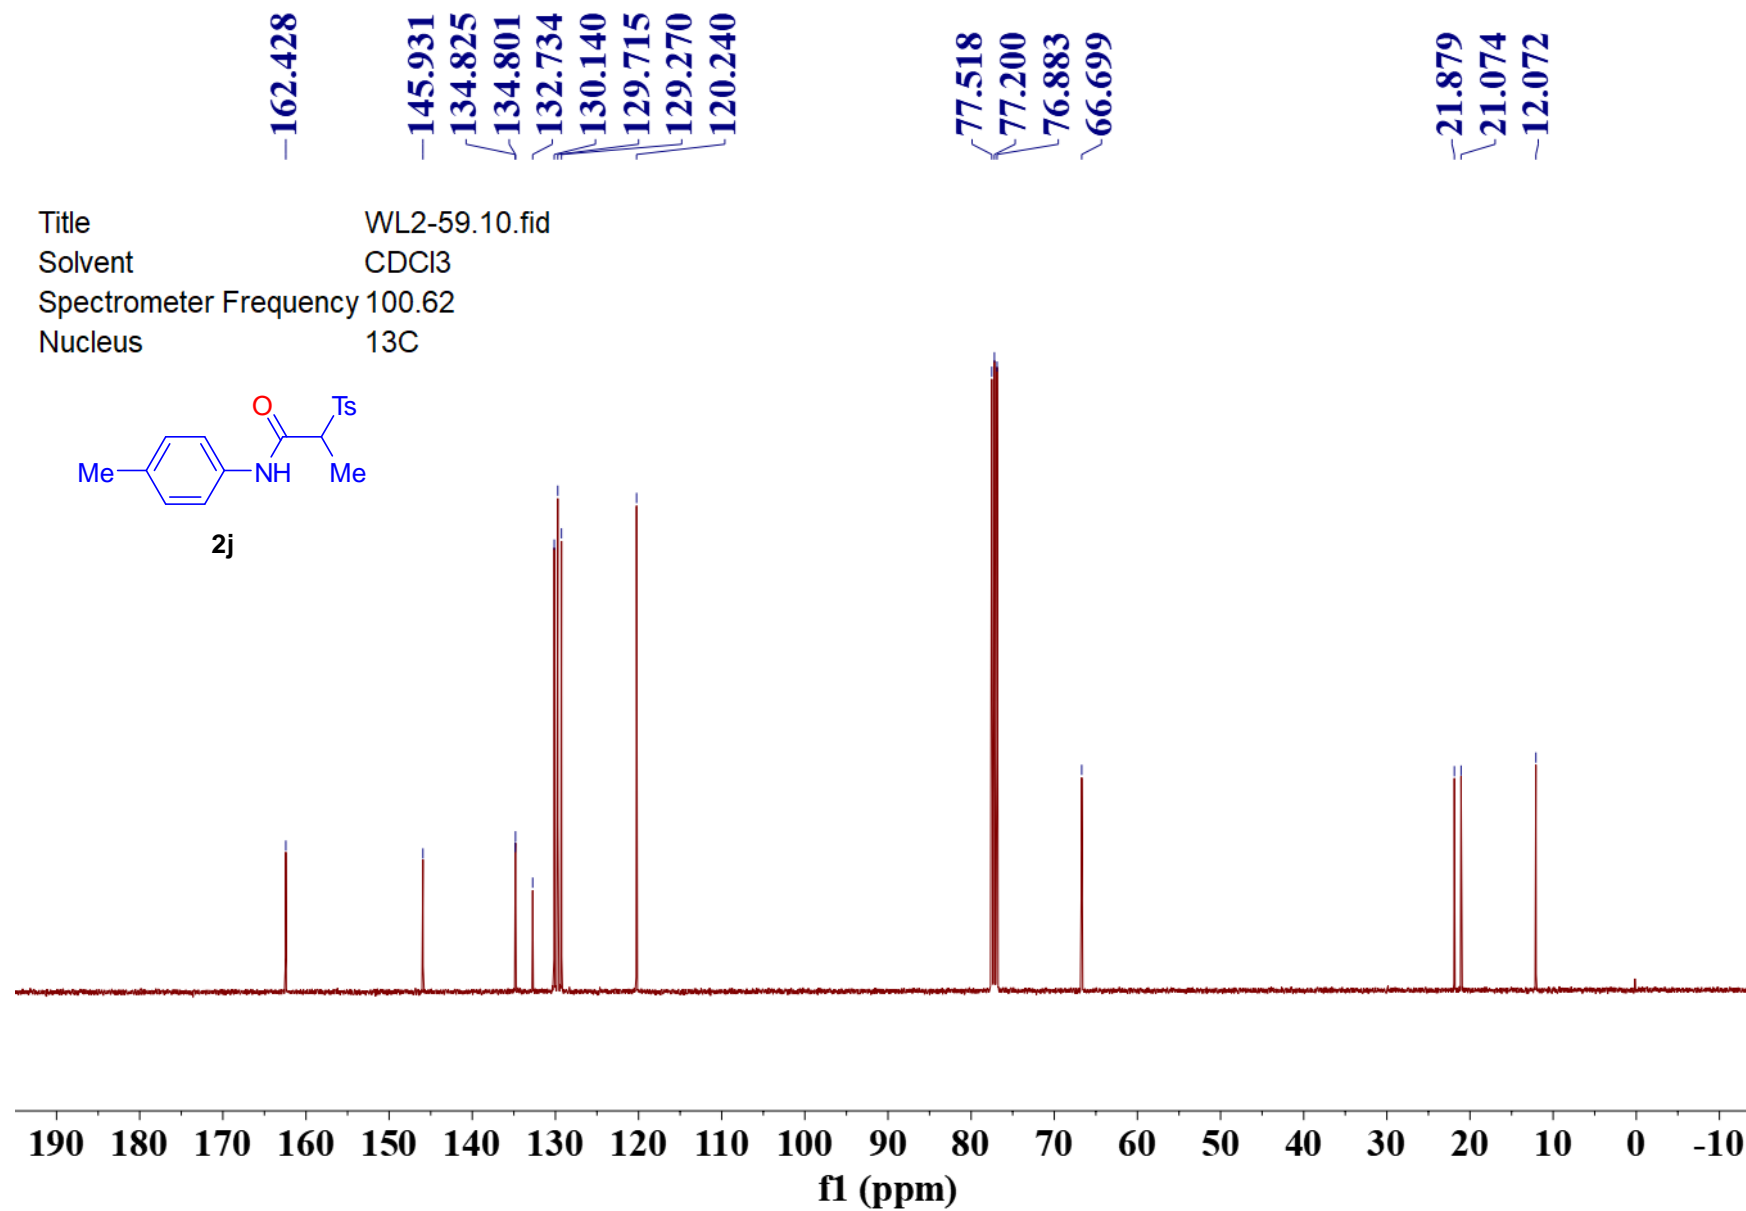

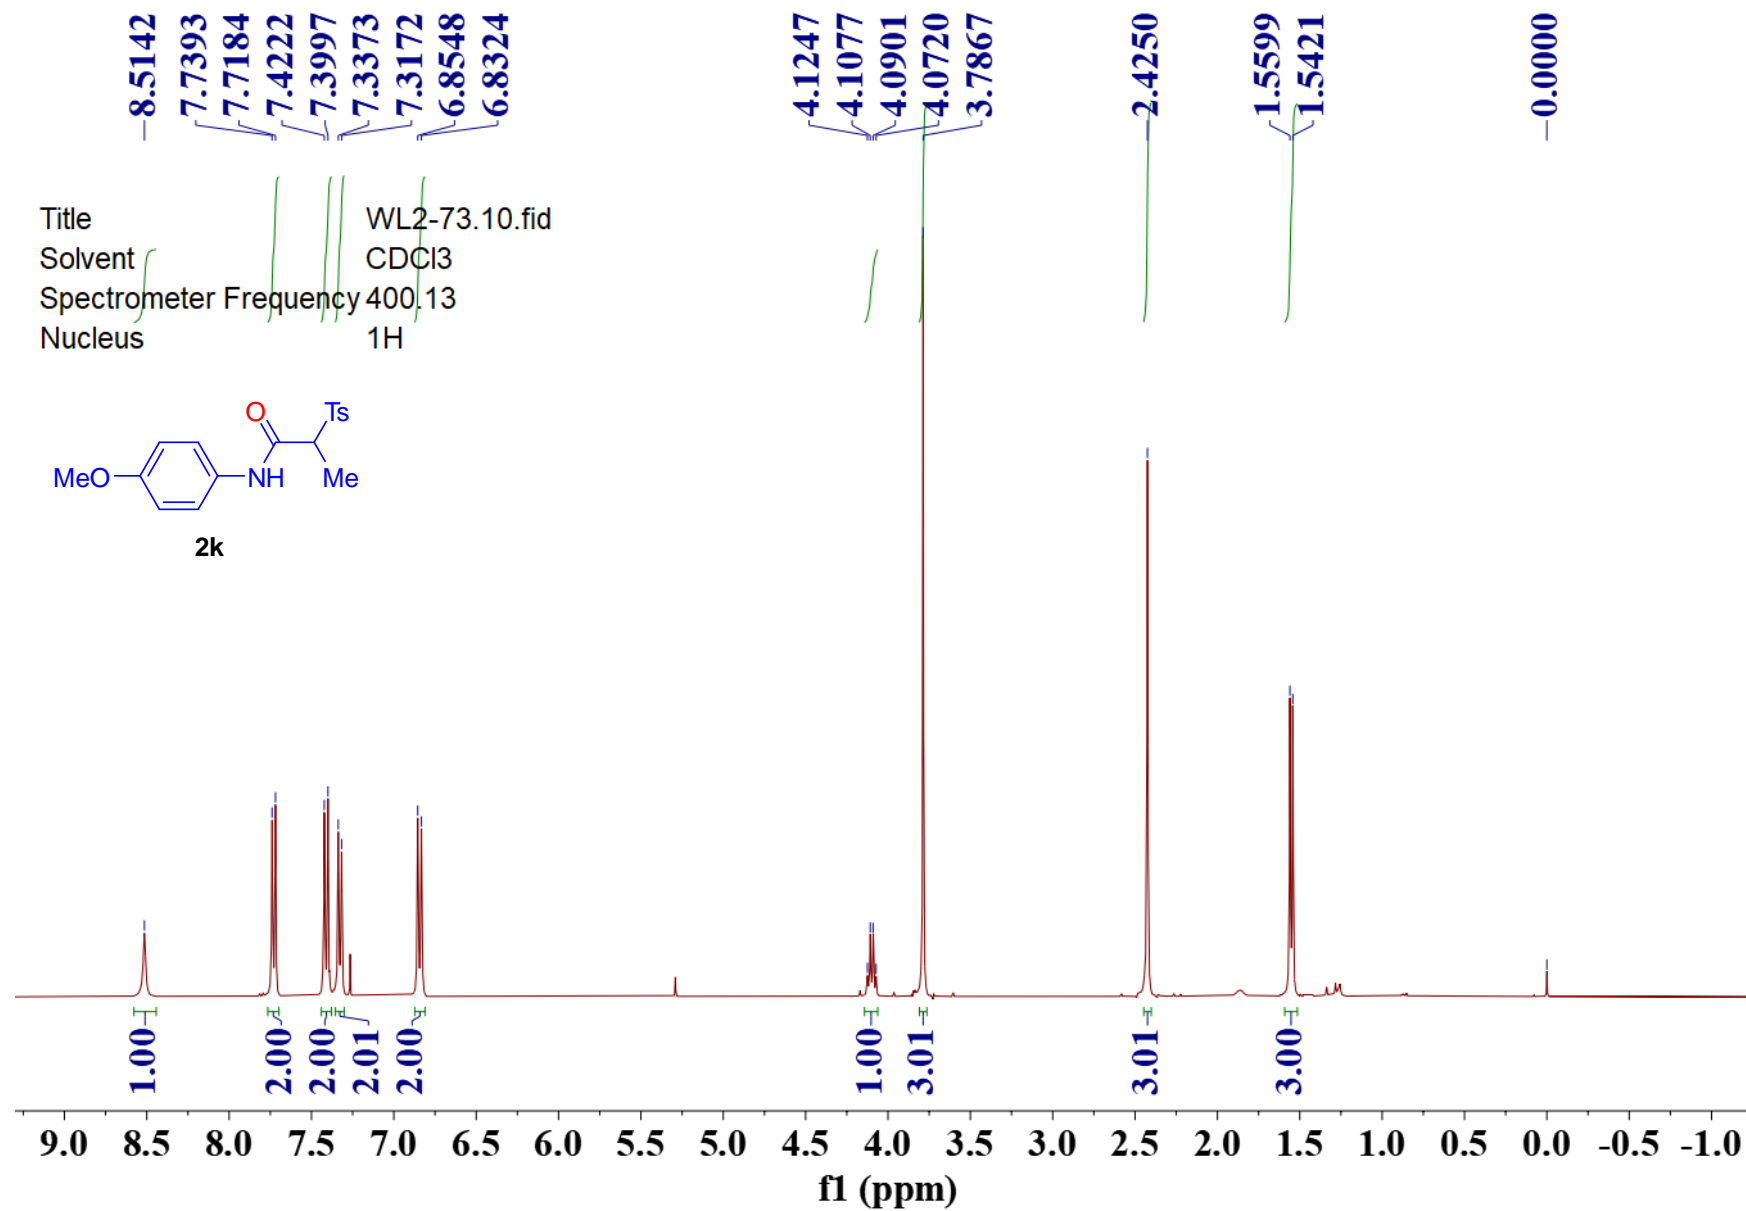



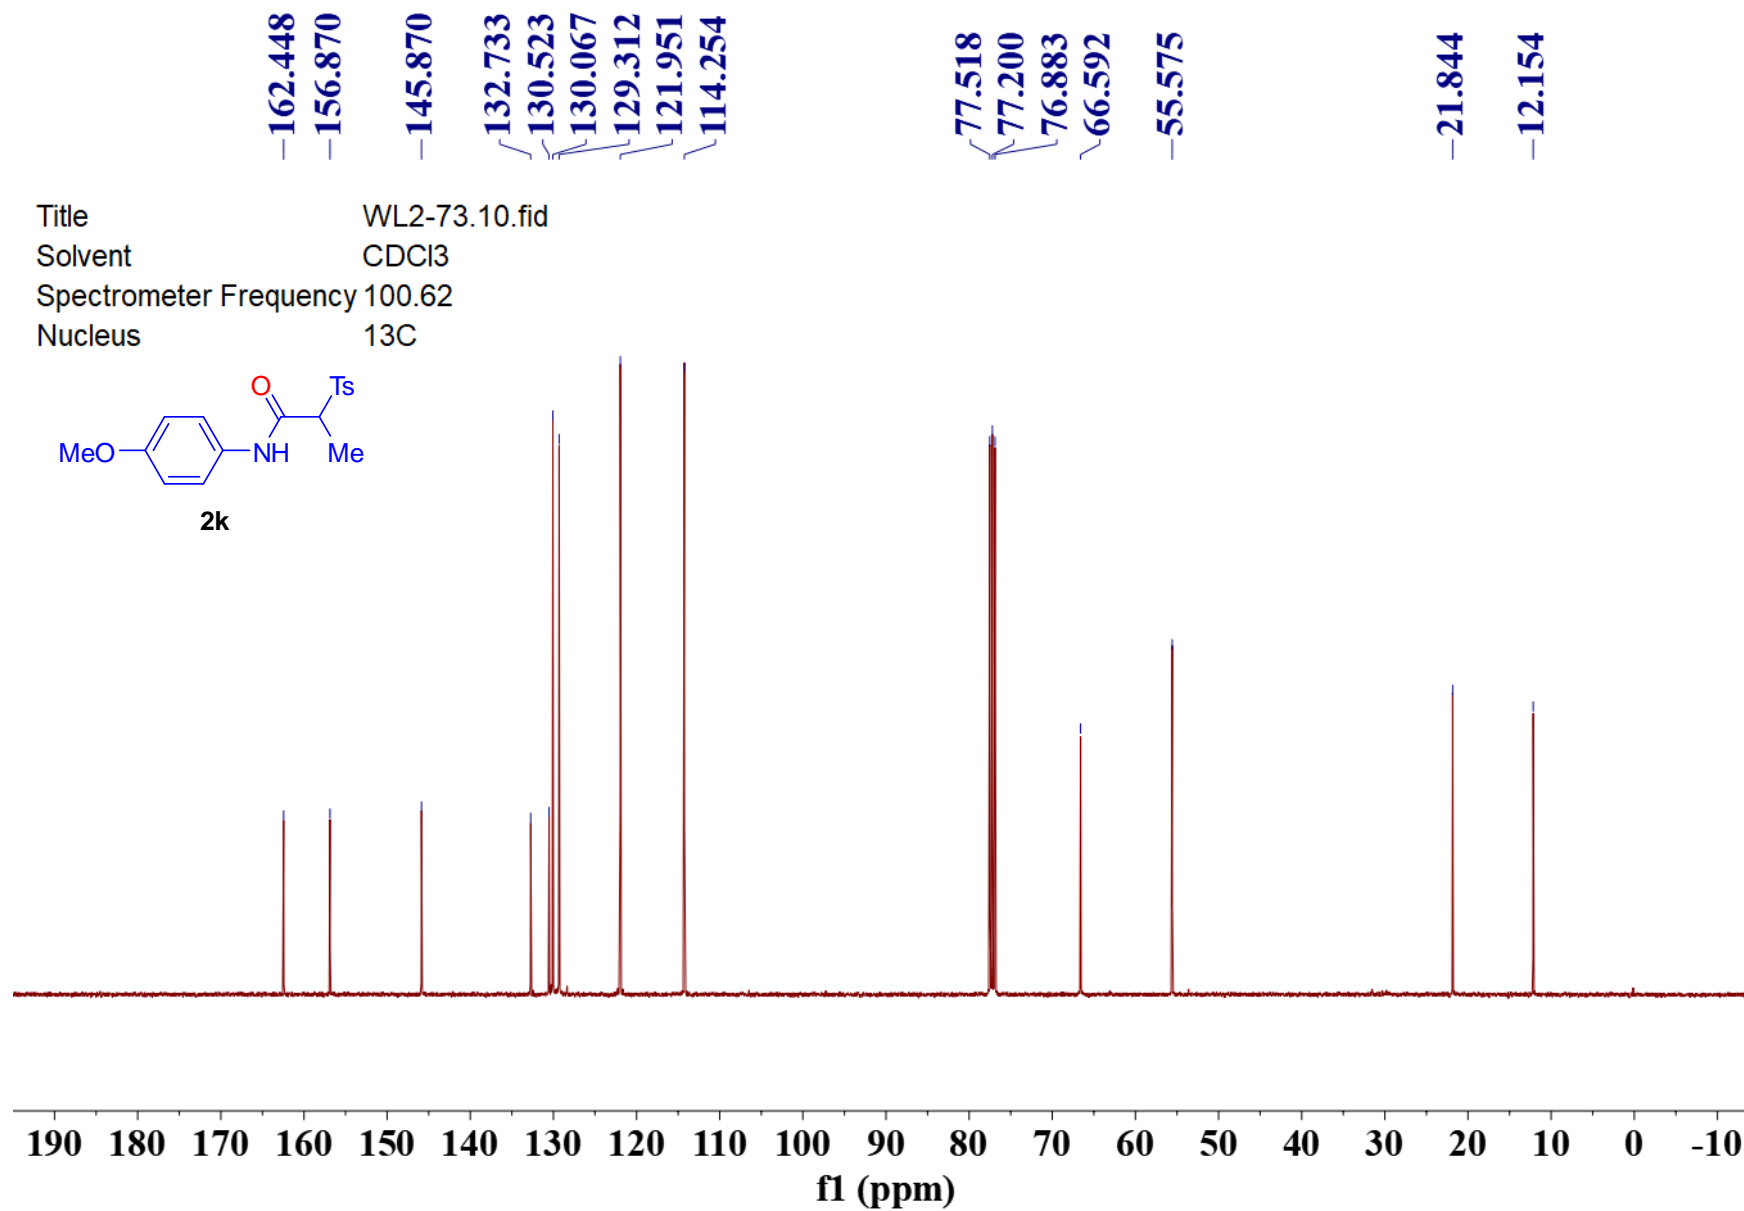

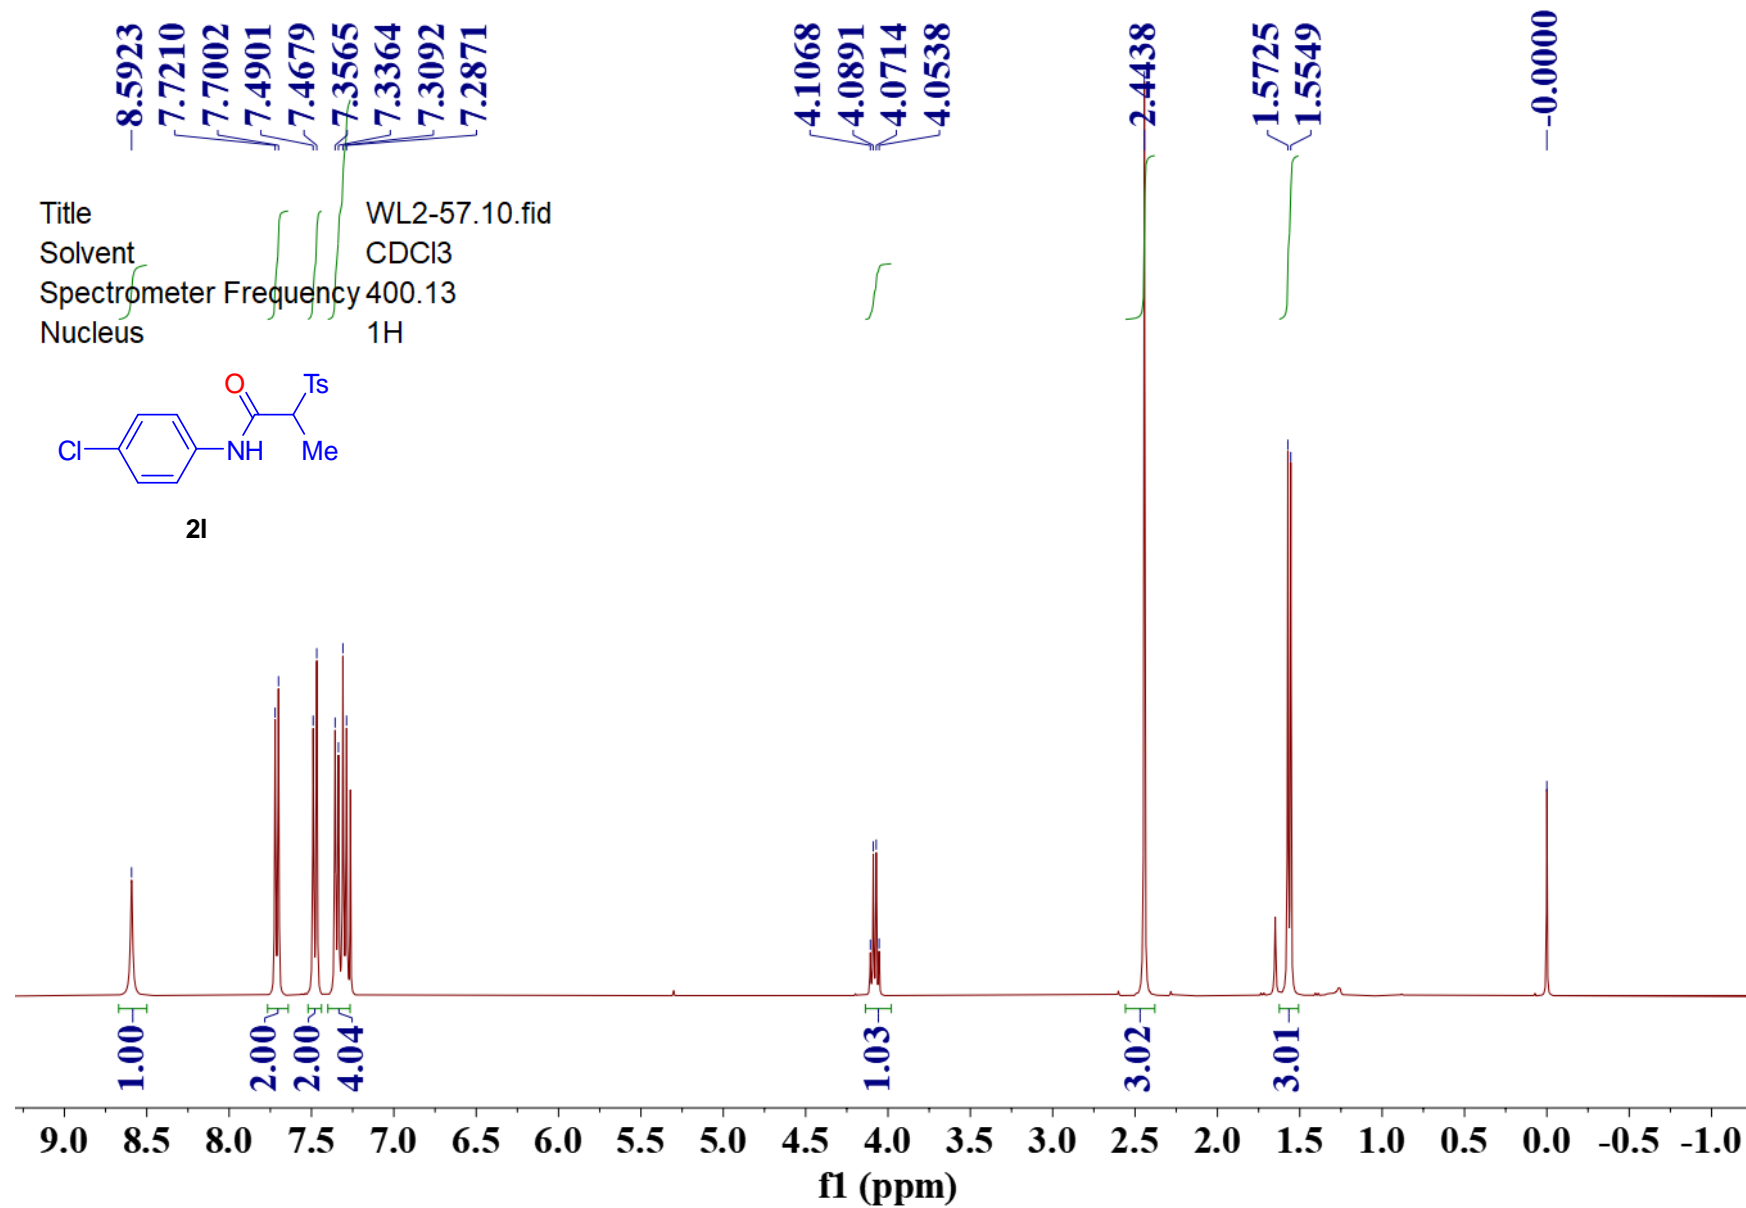

162.612  
 146.185  
 135.951  
 132.591  
 130.252  
 130.174  
 129.309  
 129.246  
 121.427

77.518  
 77.200  
 76.883  
 66.702

21.924  
 12.092

Title WL2-57.10.fid  
 Solvent CDCl3  
 Spectrometer Frequency 100.62  
 Nucleus 13C

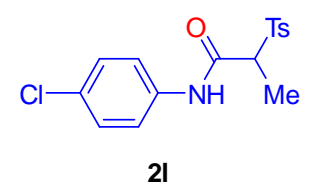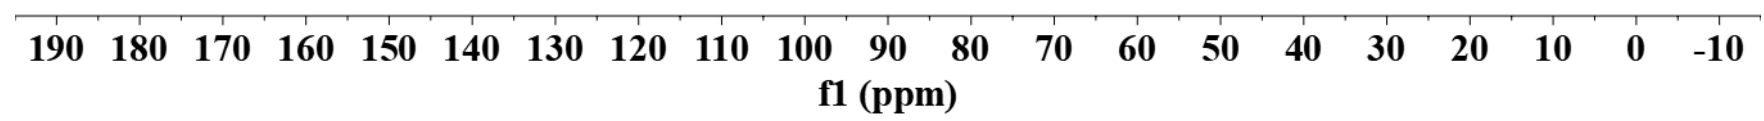

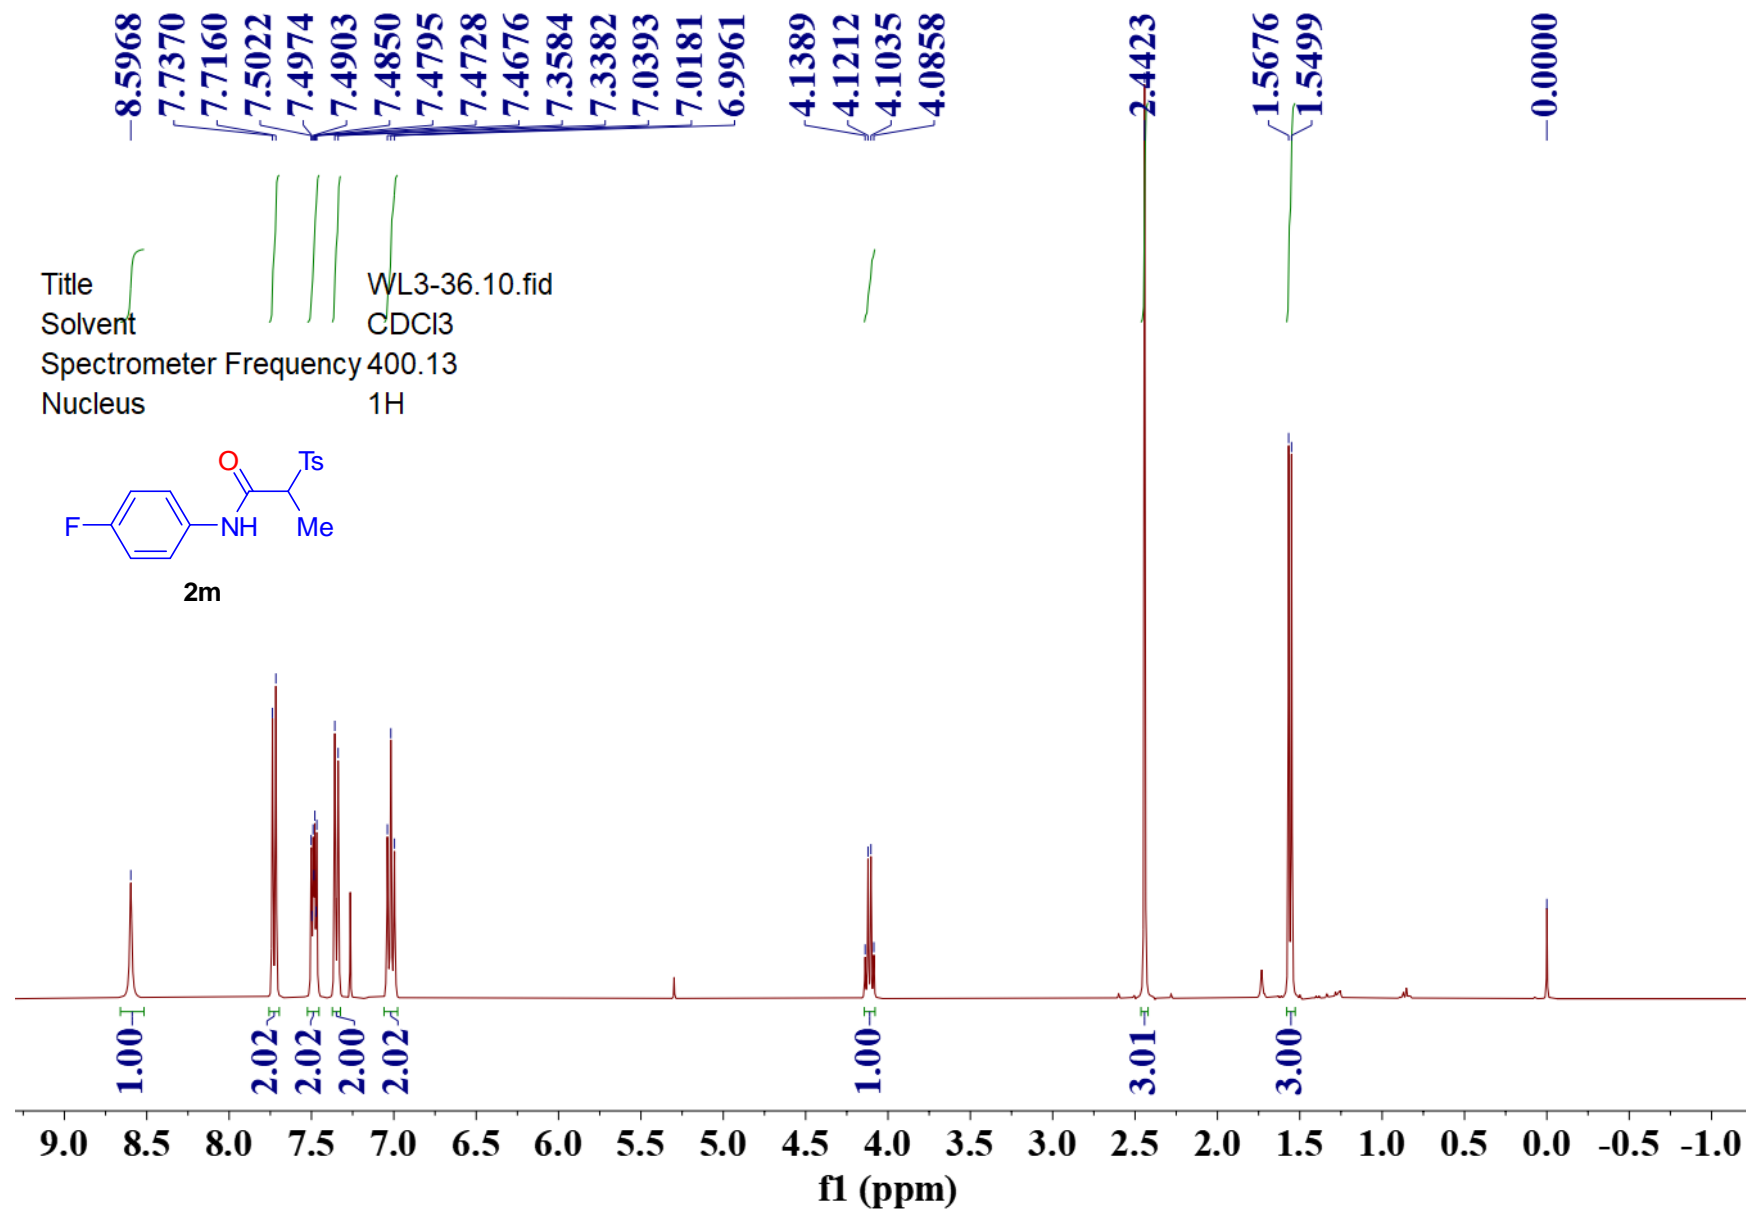

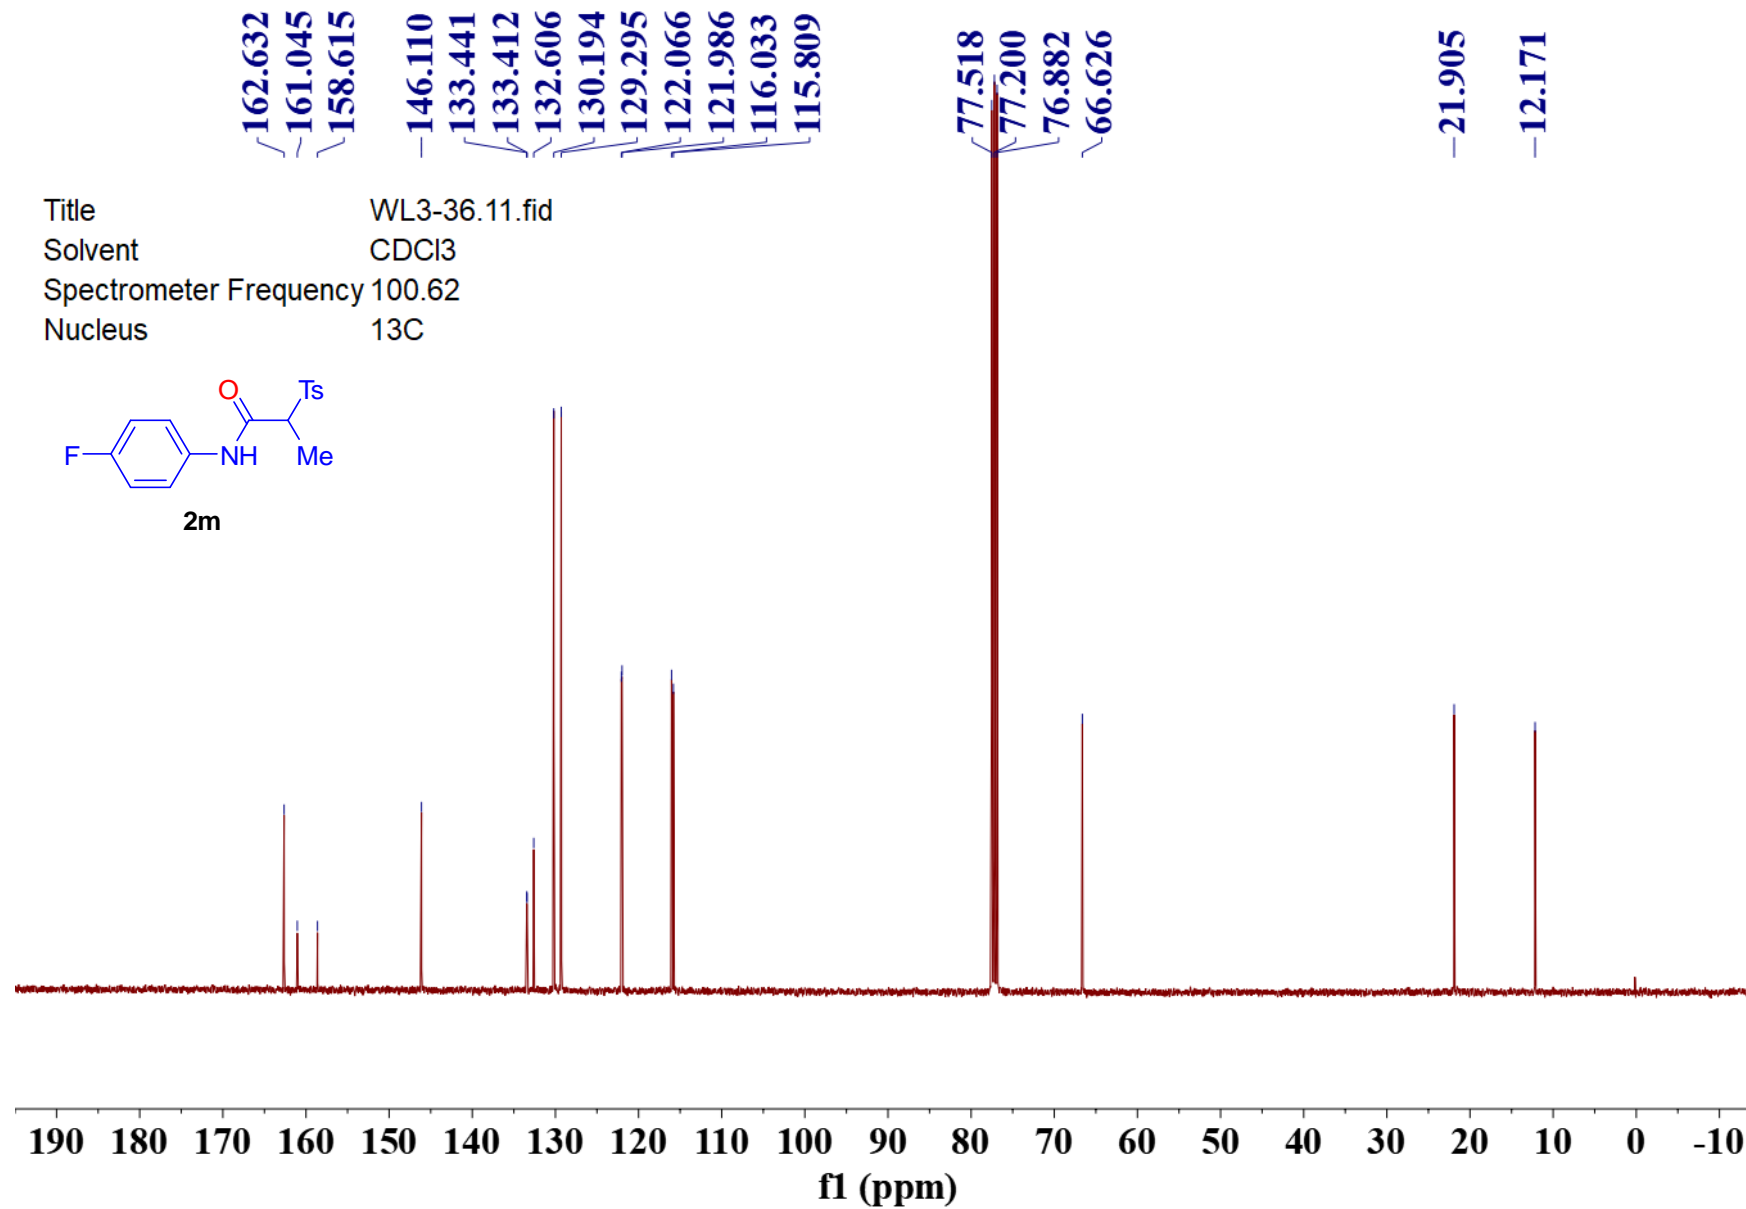

Title WL3-36.10.fid  
Solvent CDCl3  
Spectrometer Frequency 376.46  
Nucleus 19F

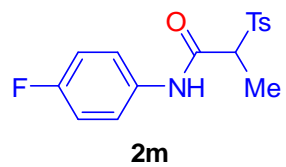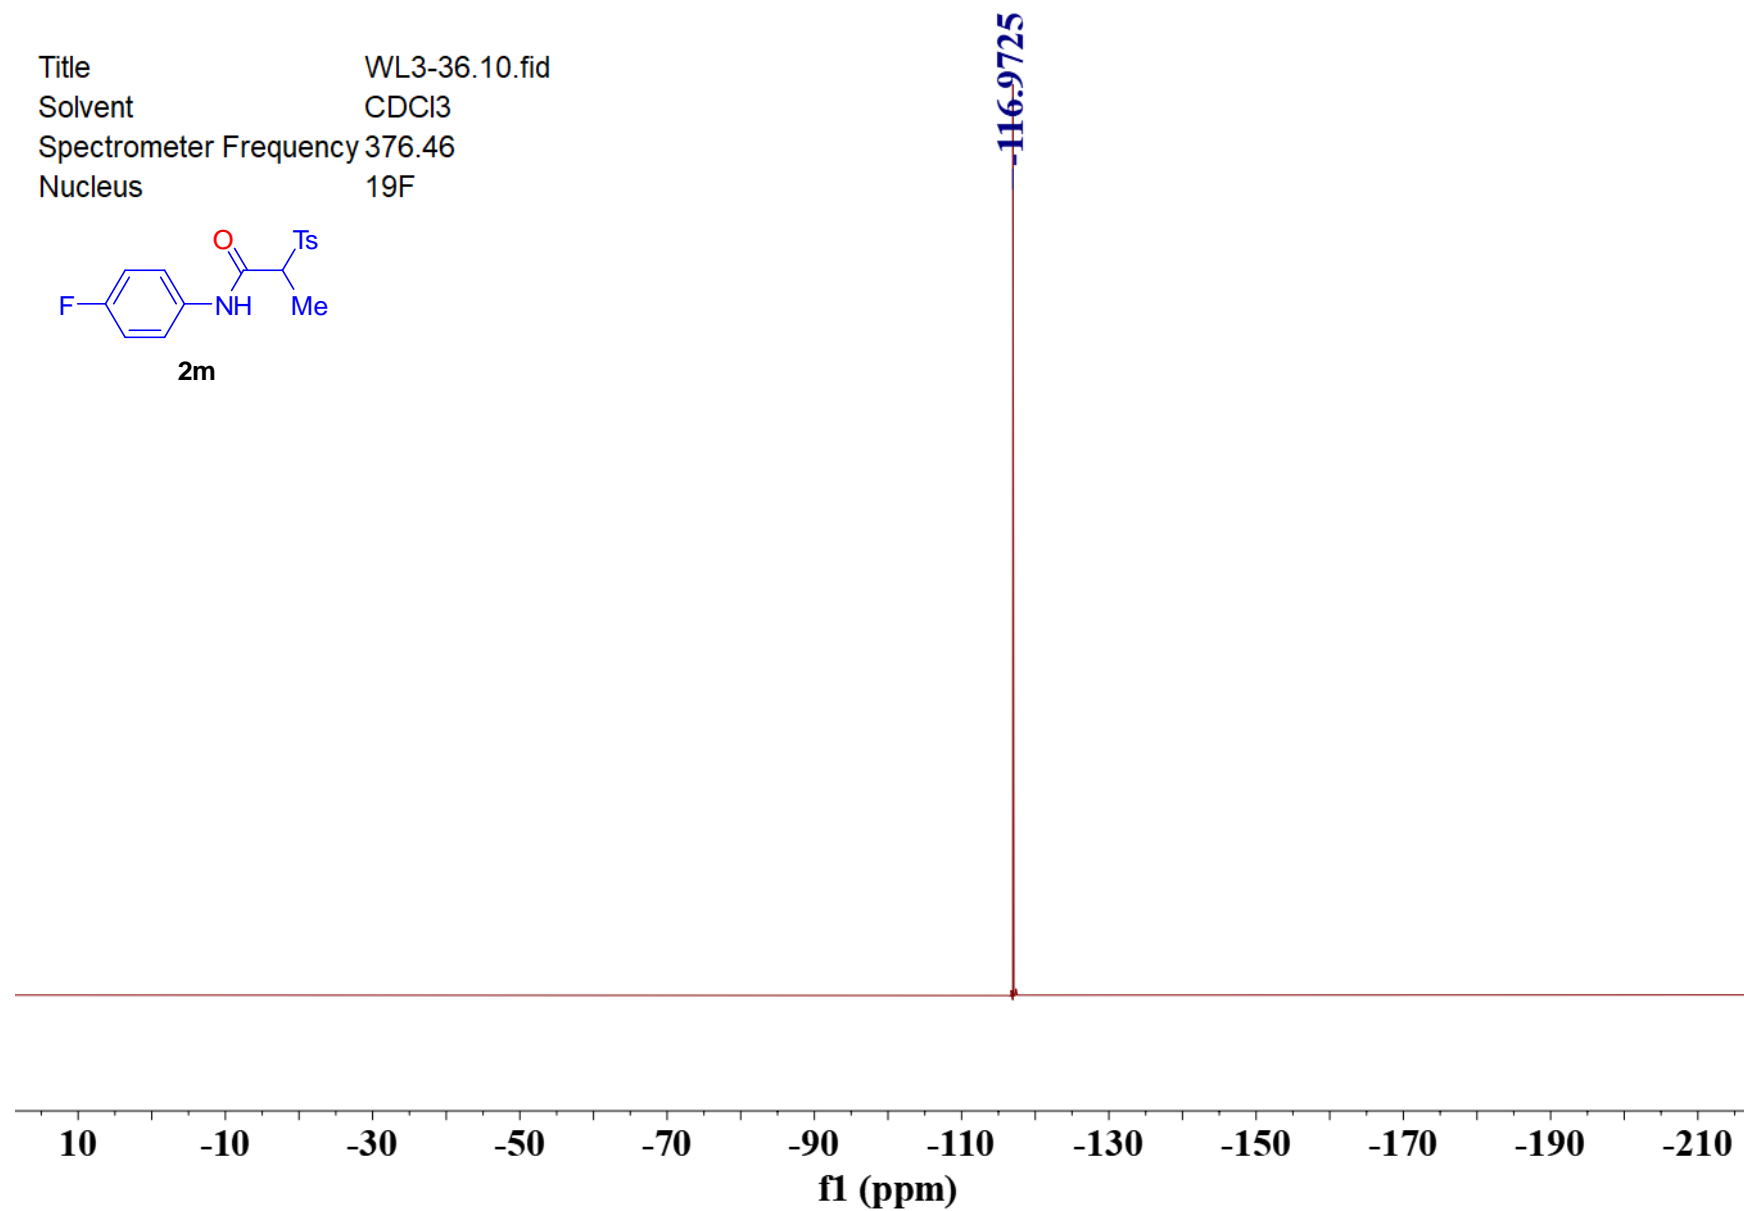

S113

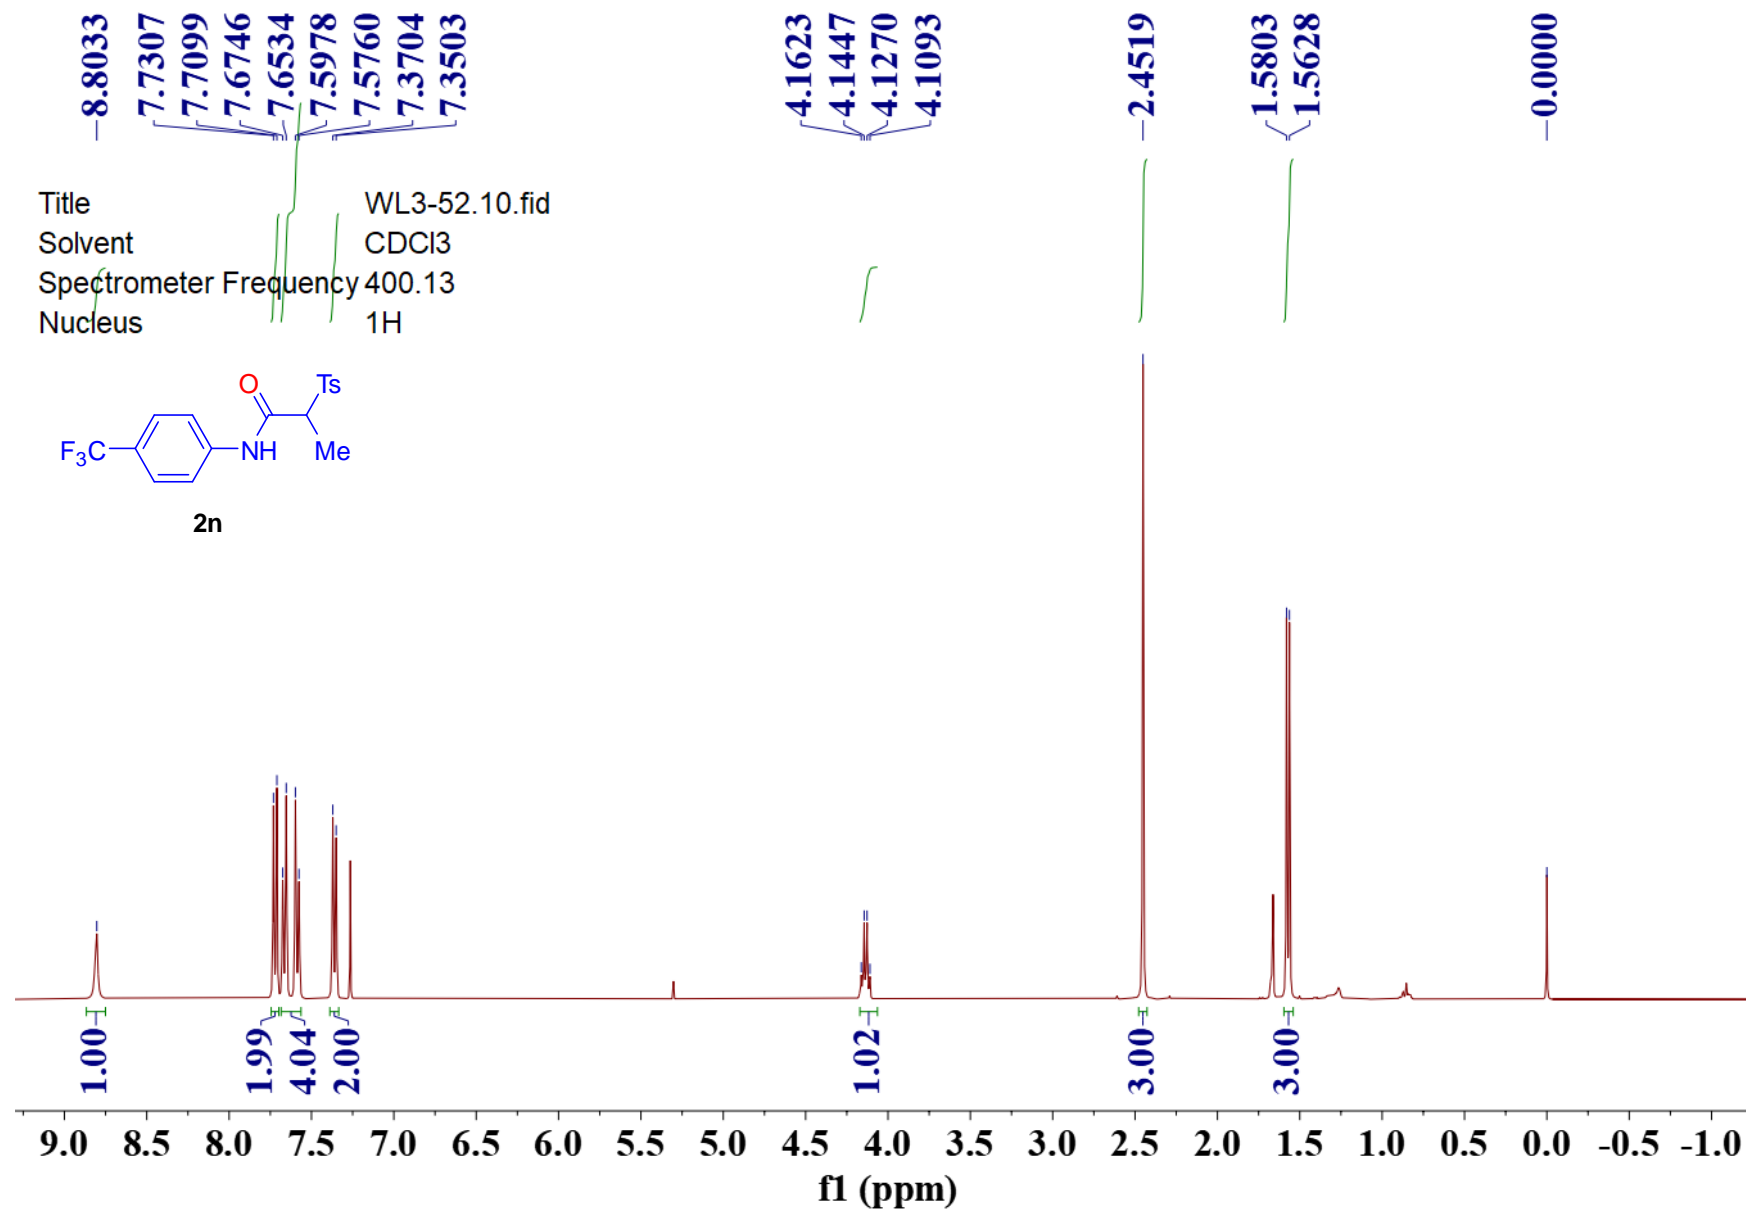

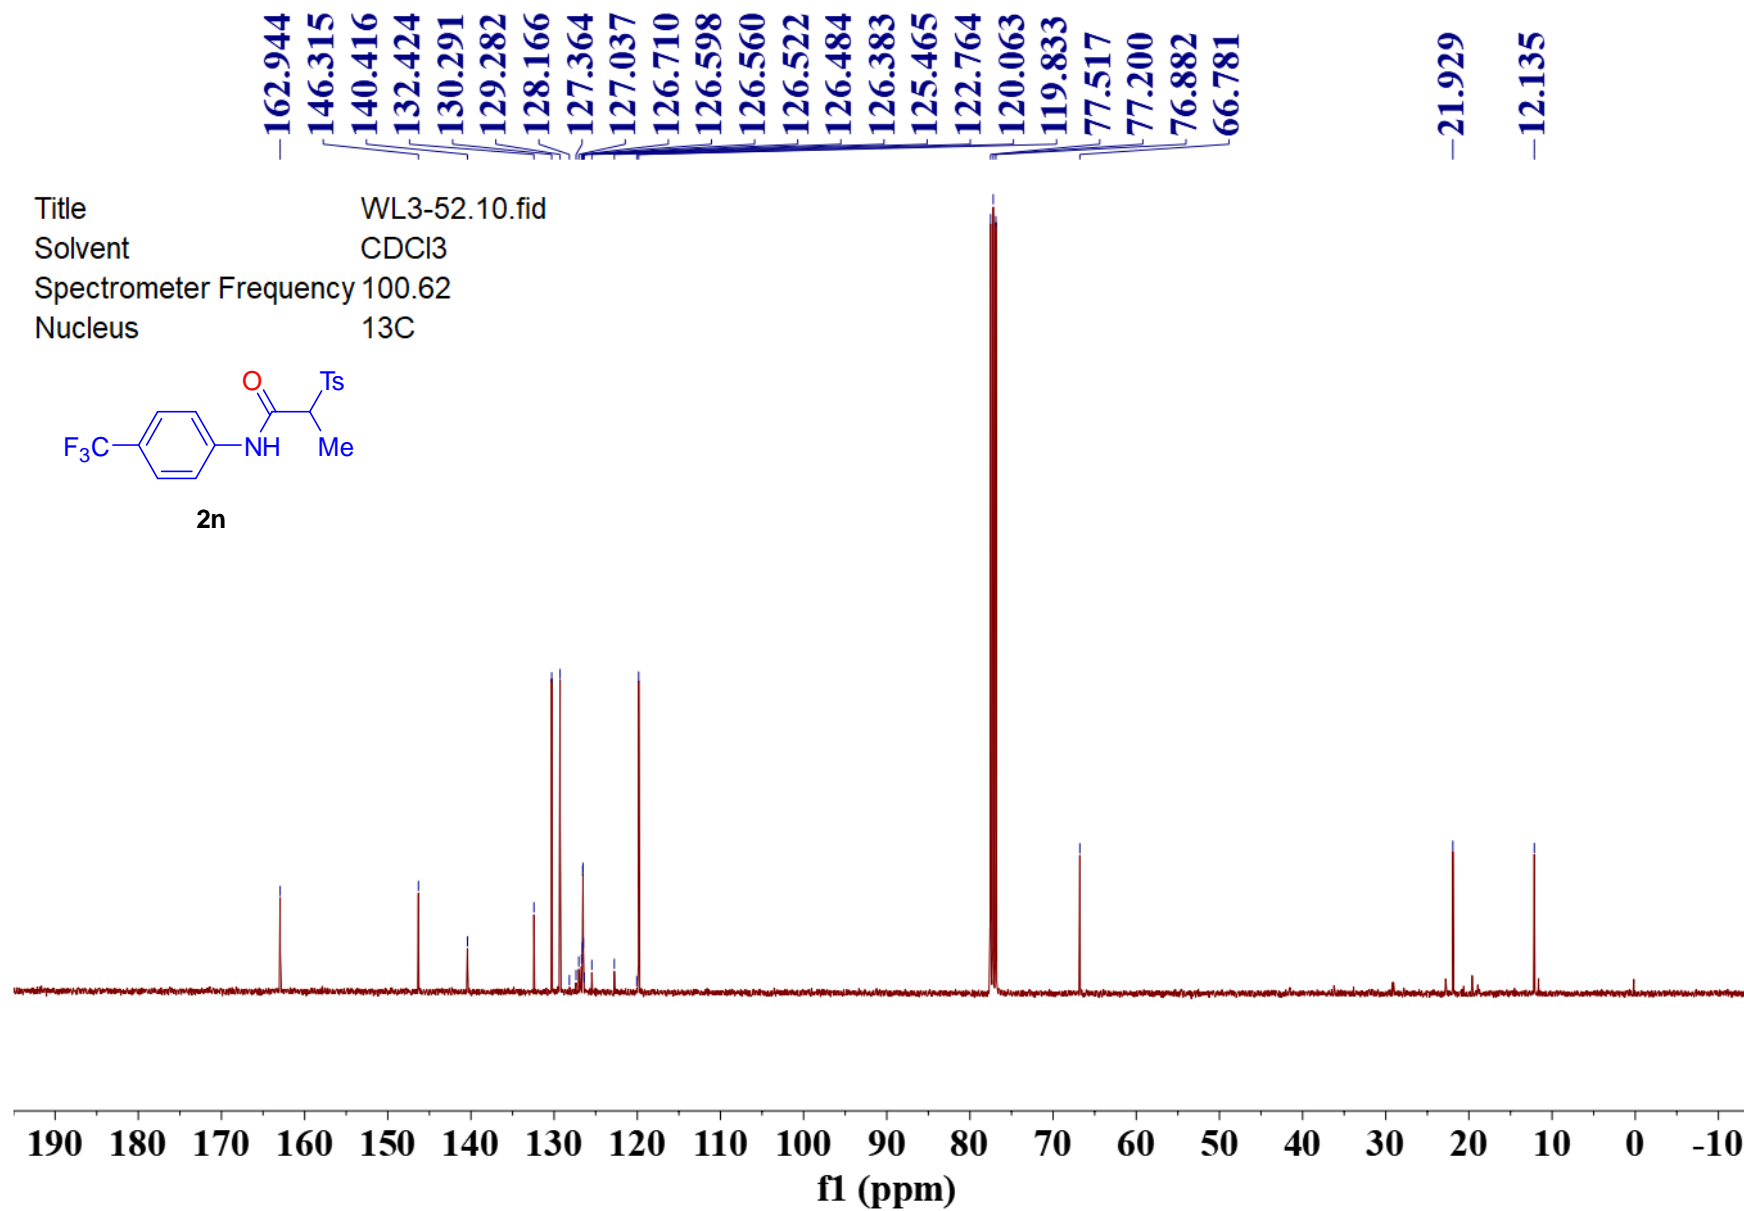



Title WL3-52.11.fid  
Solvent CDCl3  
Spectrometer Frequency 376.46  
Nucleus <sup>19</sup>F

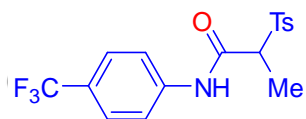

**2n**

--62.2064

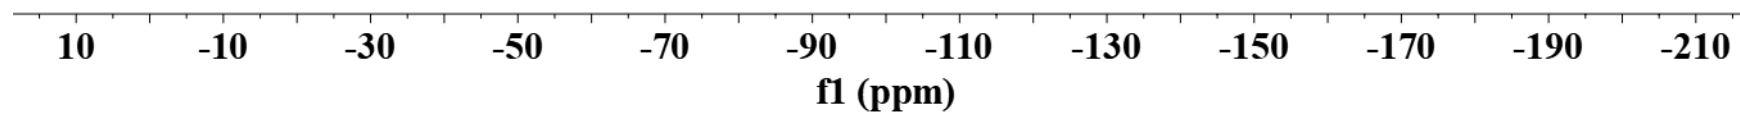

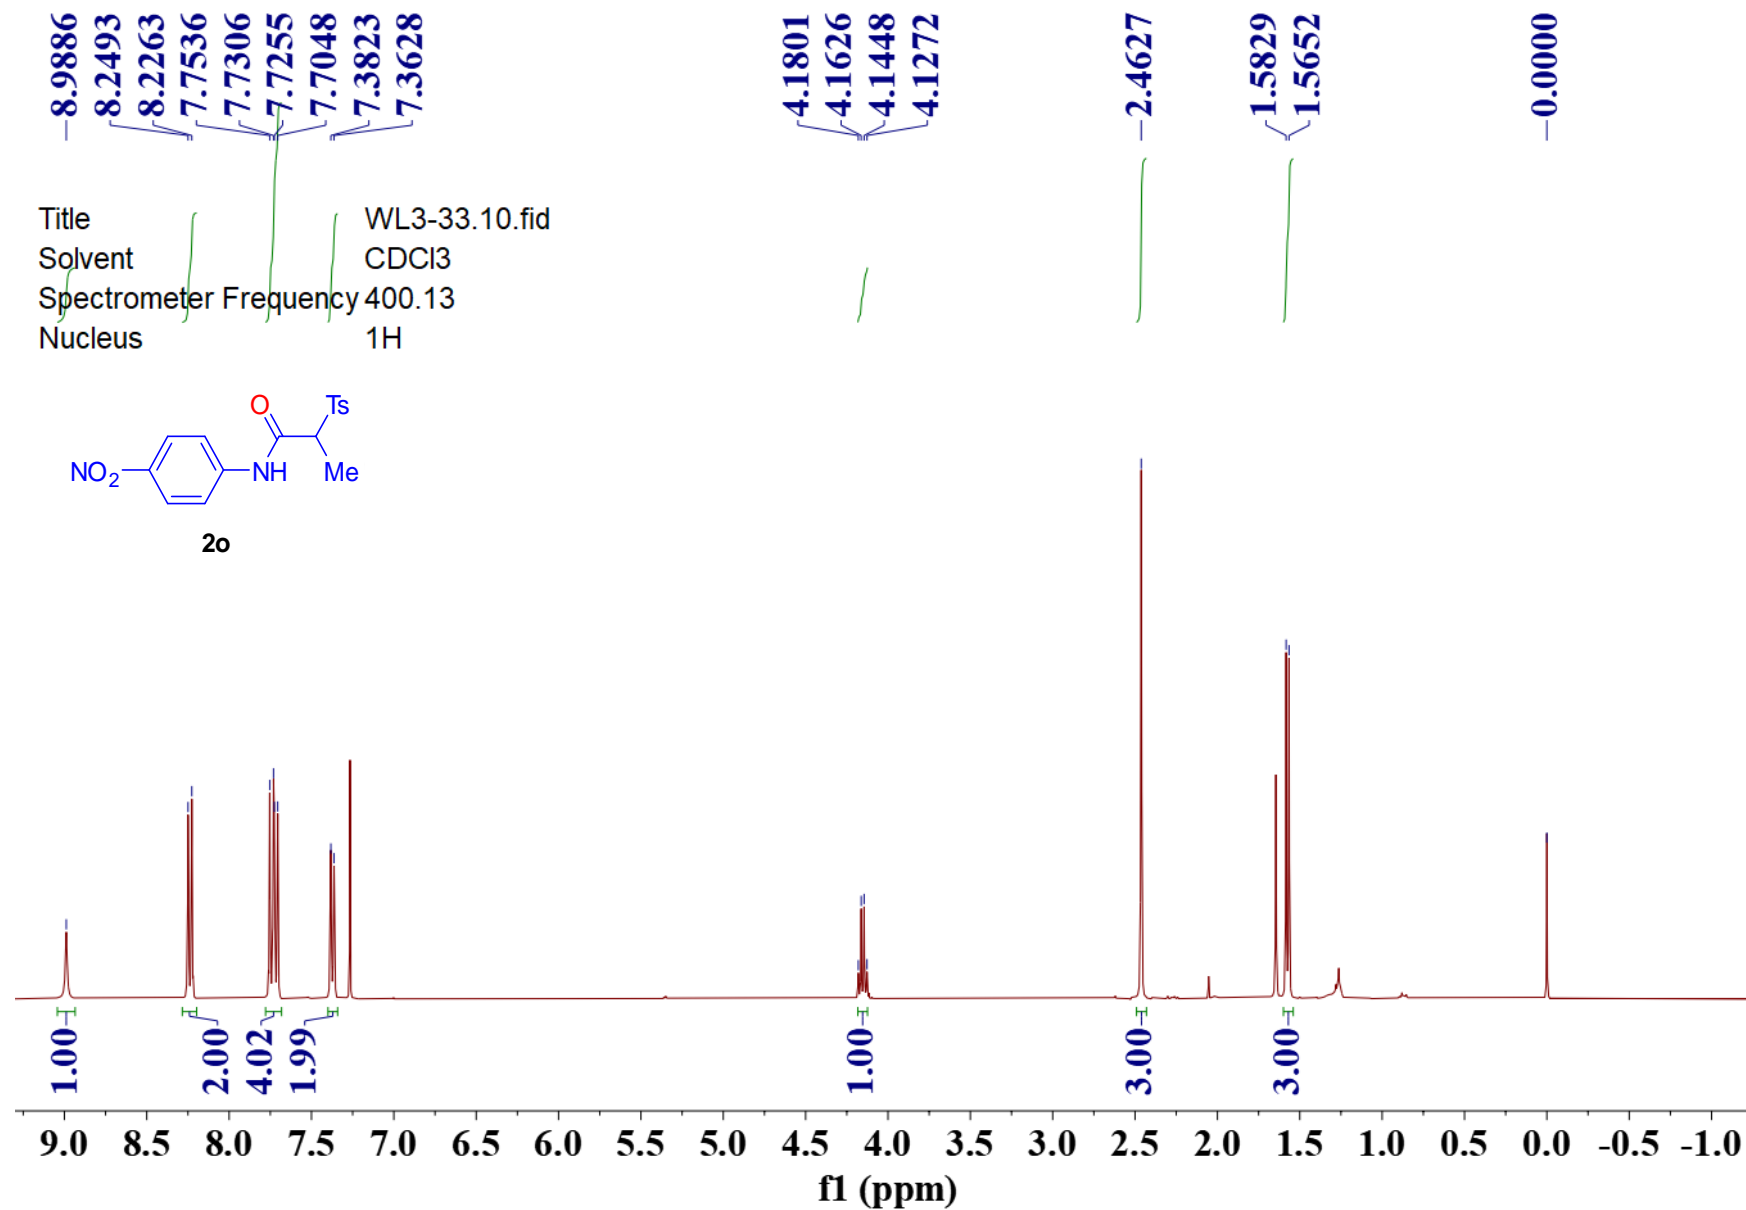

Title WL3-33.11.fid  
Solvent CDCl<sub>3</sub>  
Spectrometer Frequency 100.62  
Nucleus <sup>13</sup>C

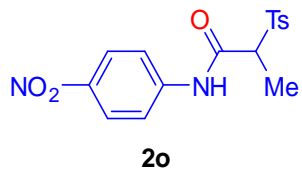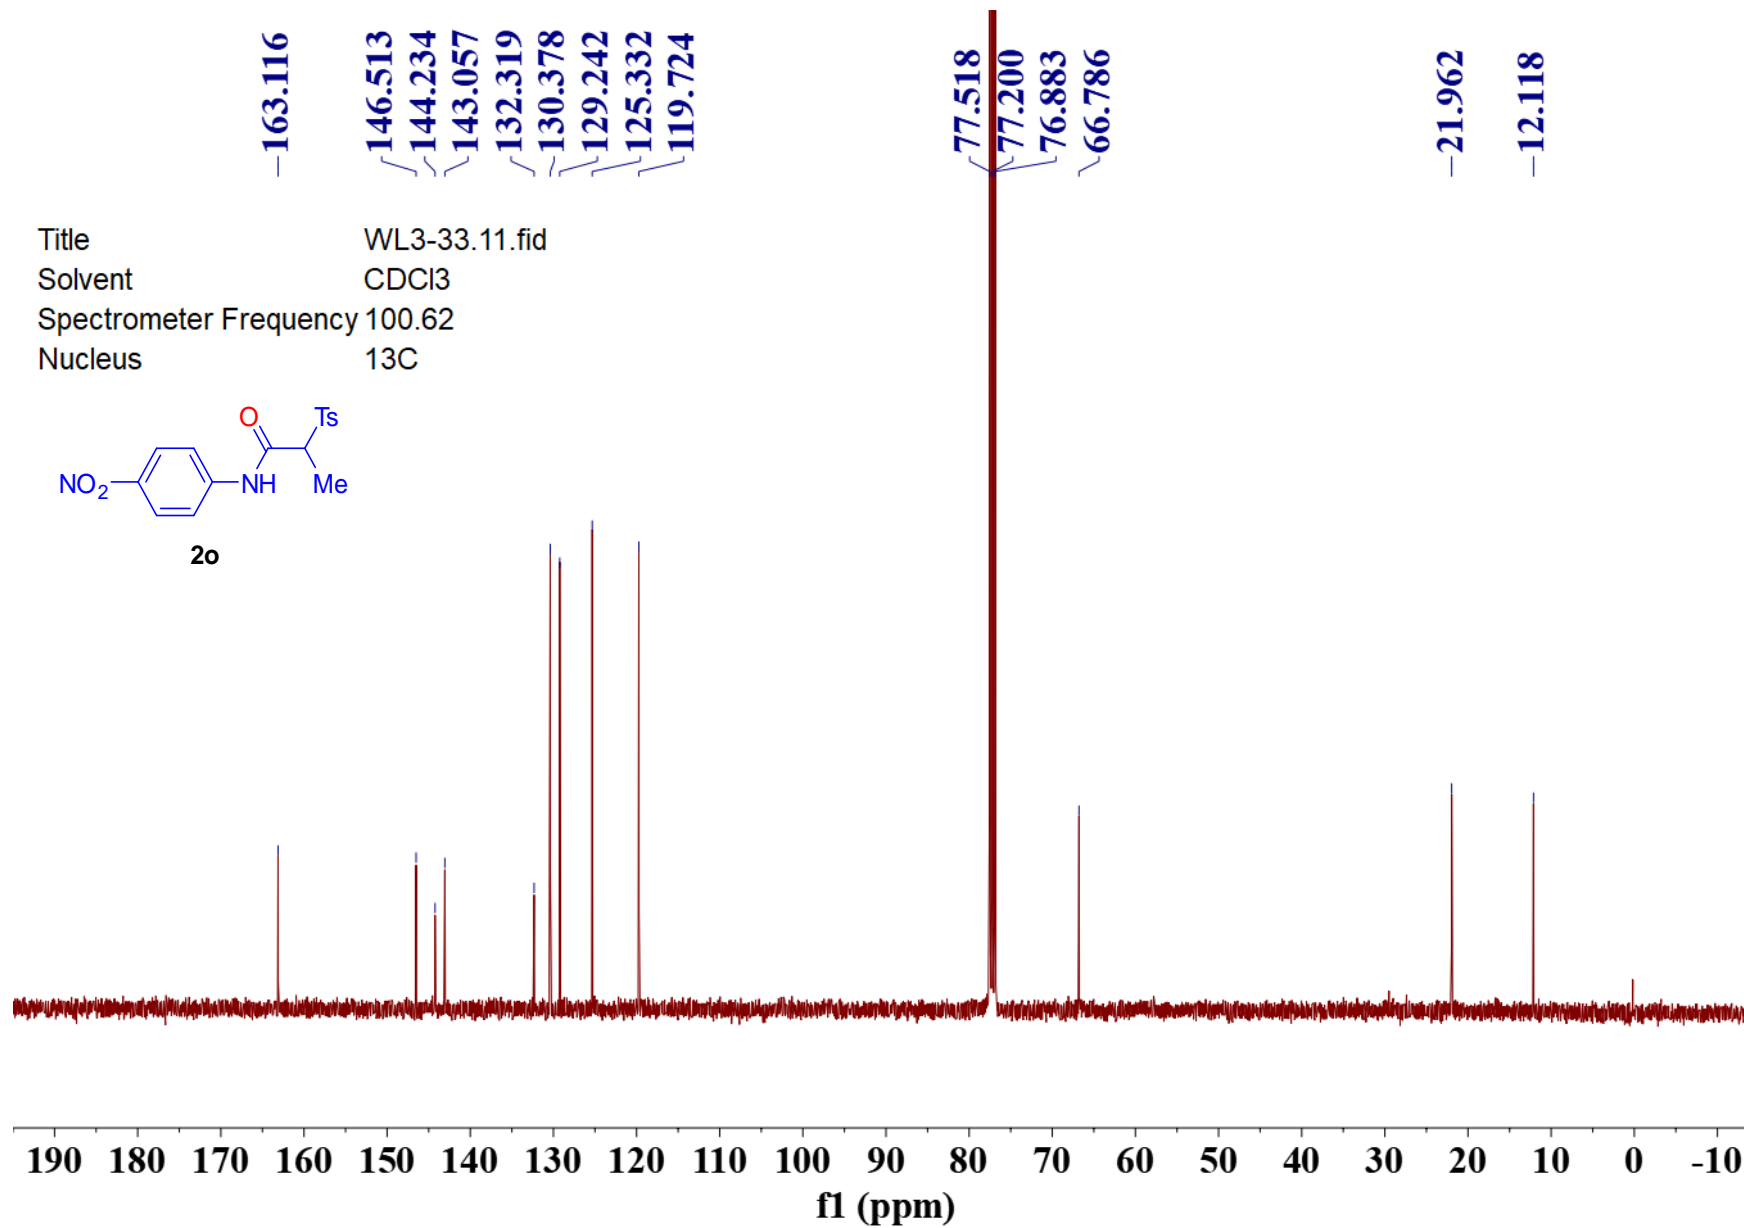

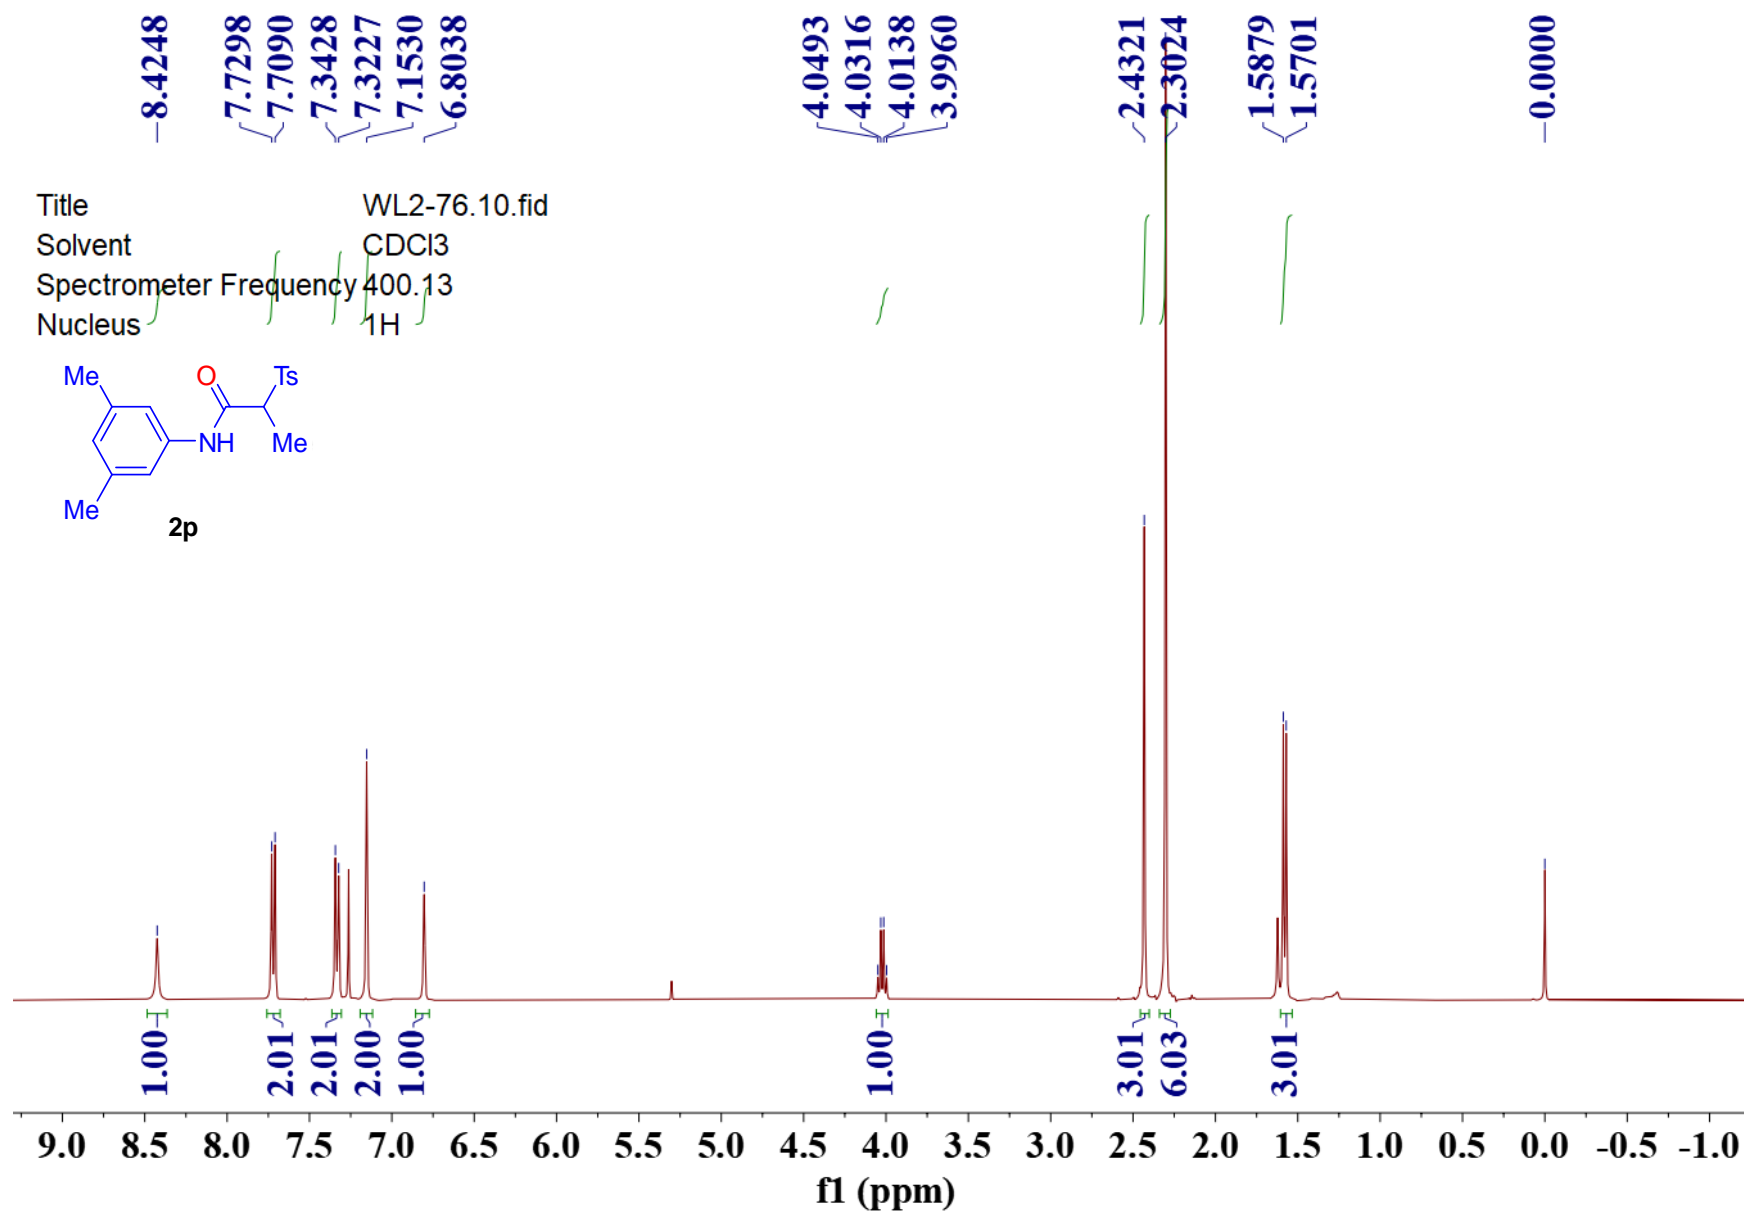

162.388  
 145.994  
 139.044  
 137.167  
 132.815  
 130.229  
 129.219  
 126.897  
 117.882

77.518  
 77.200  
 76.882  
 66.770

21.910  
 21.527  
 12.022

Title WL2-76.10.fid  
 Solvent CDCl3  
 Spectrometer Frequency 100.62  
 Nucleus 13C

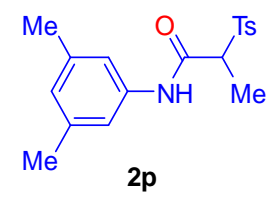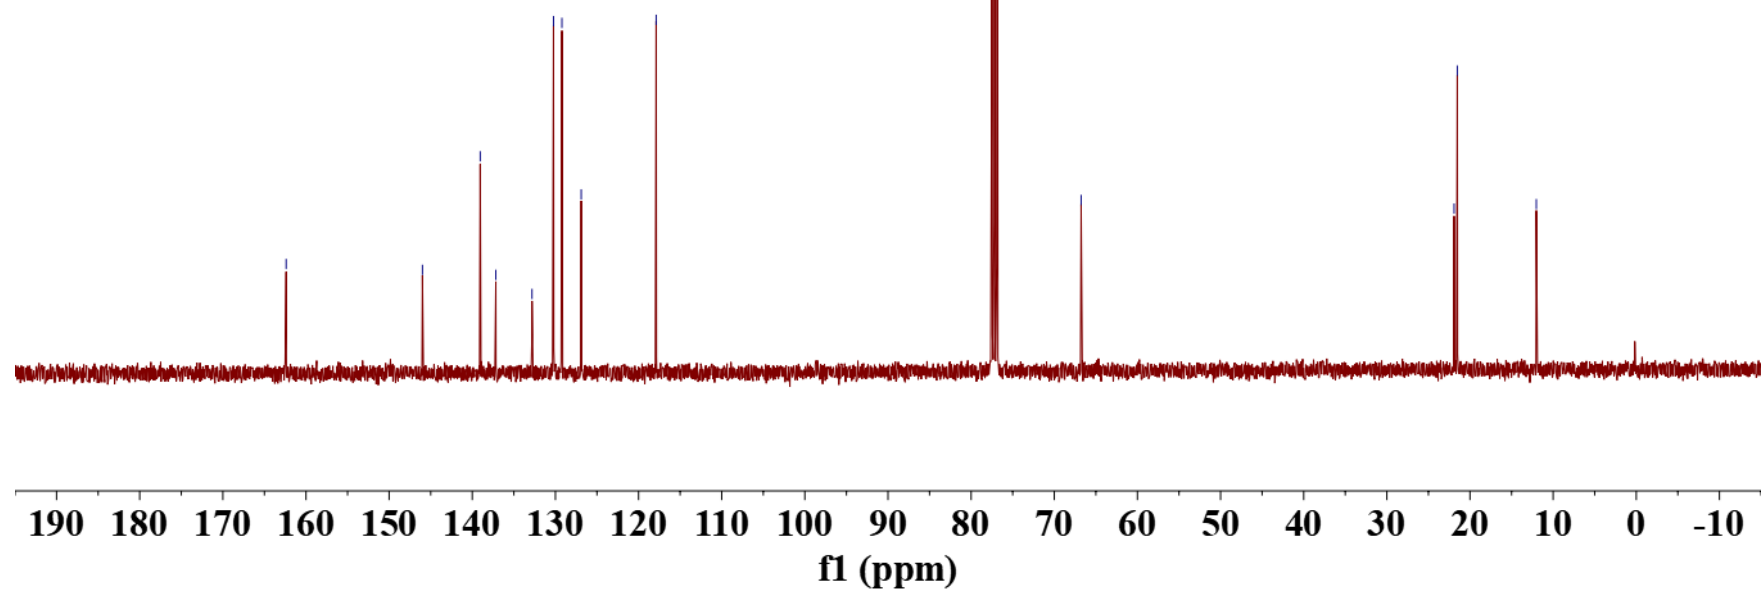

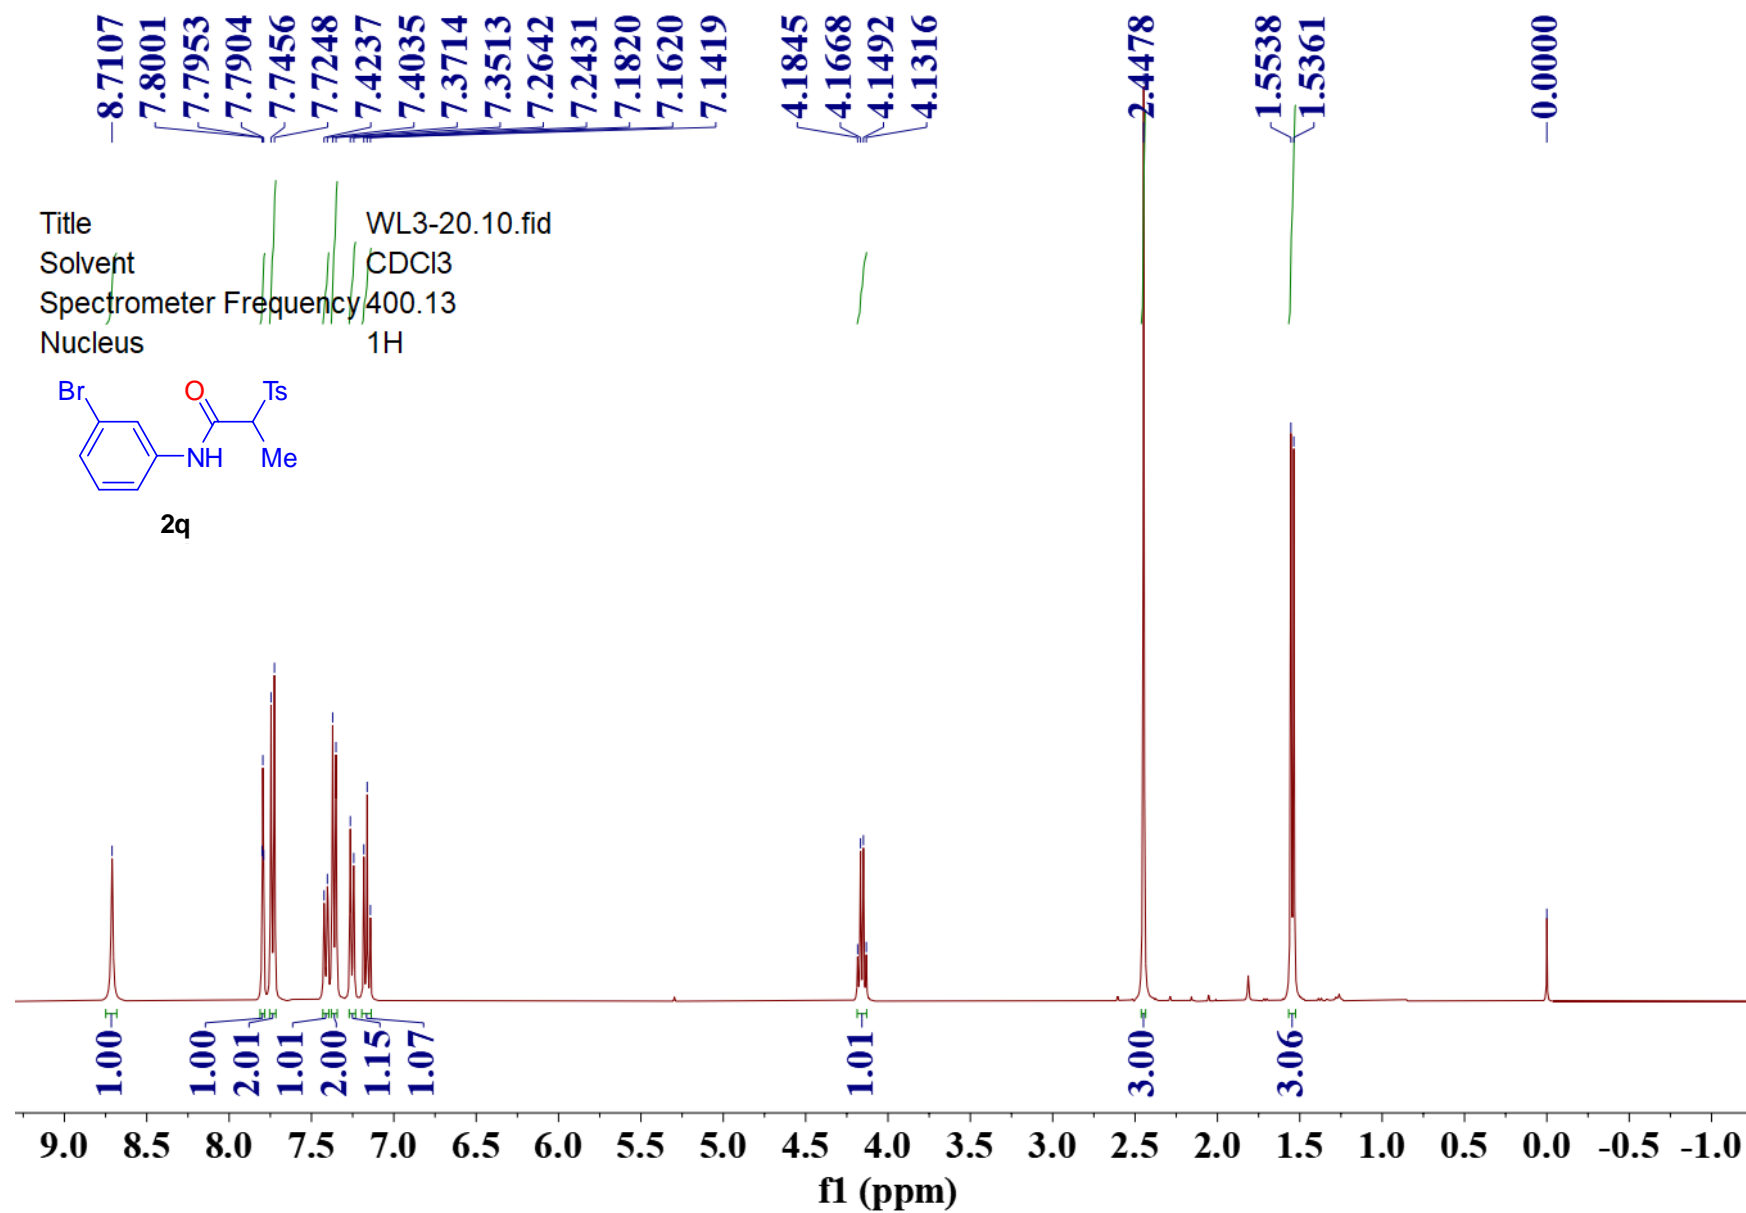

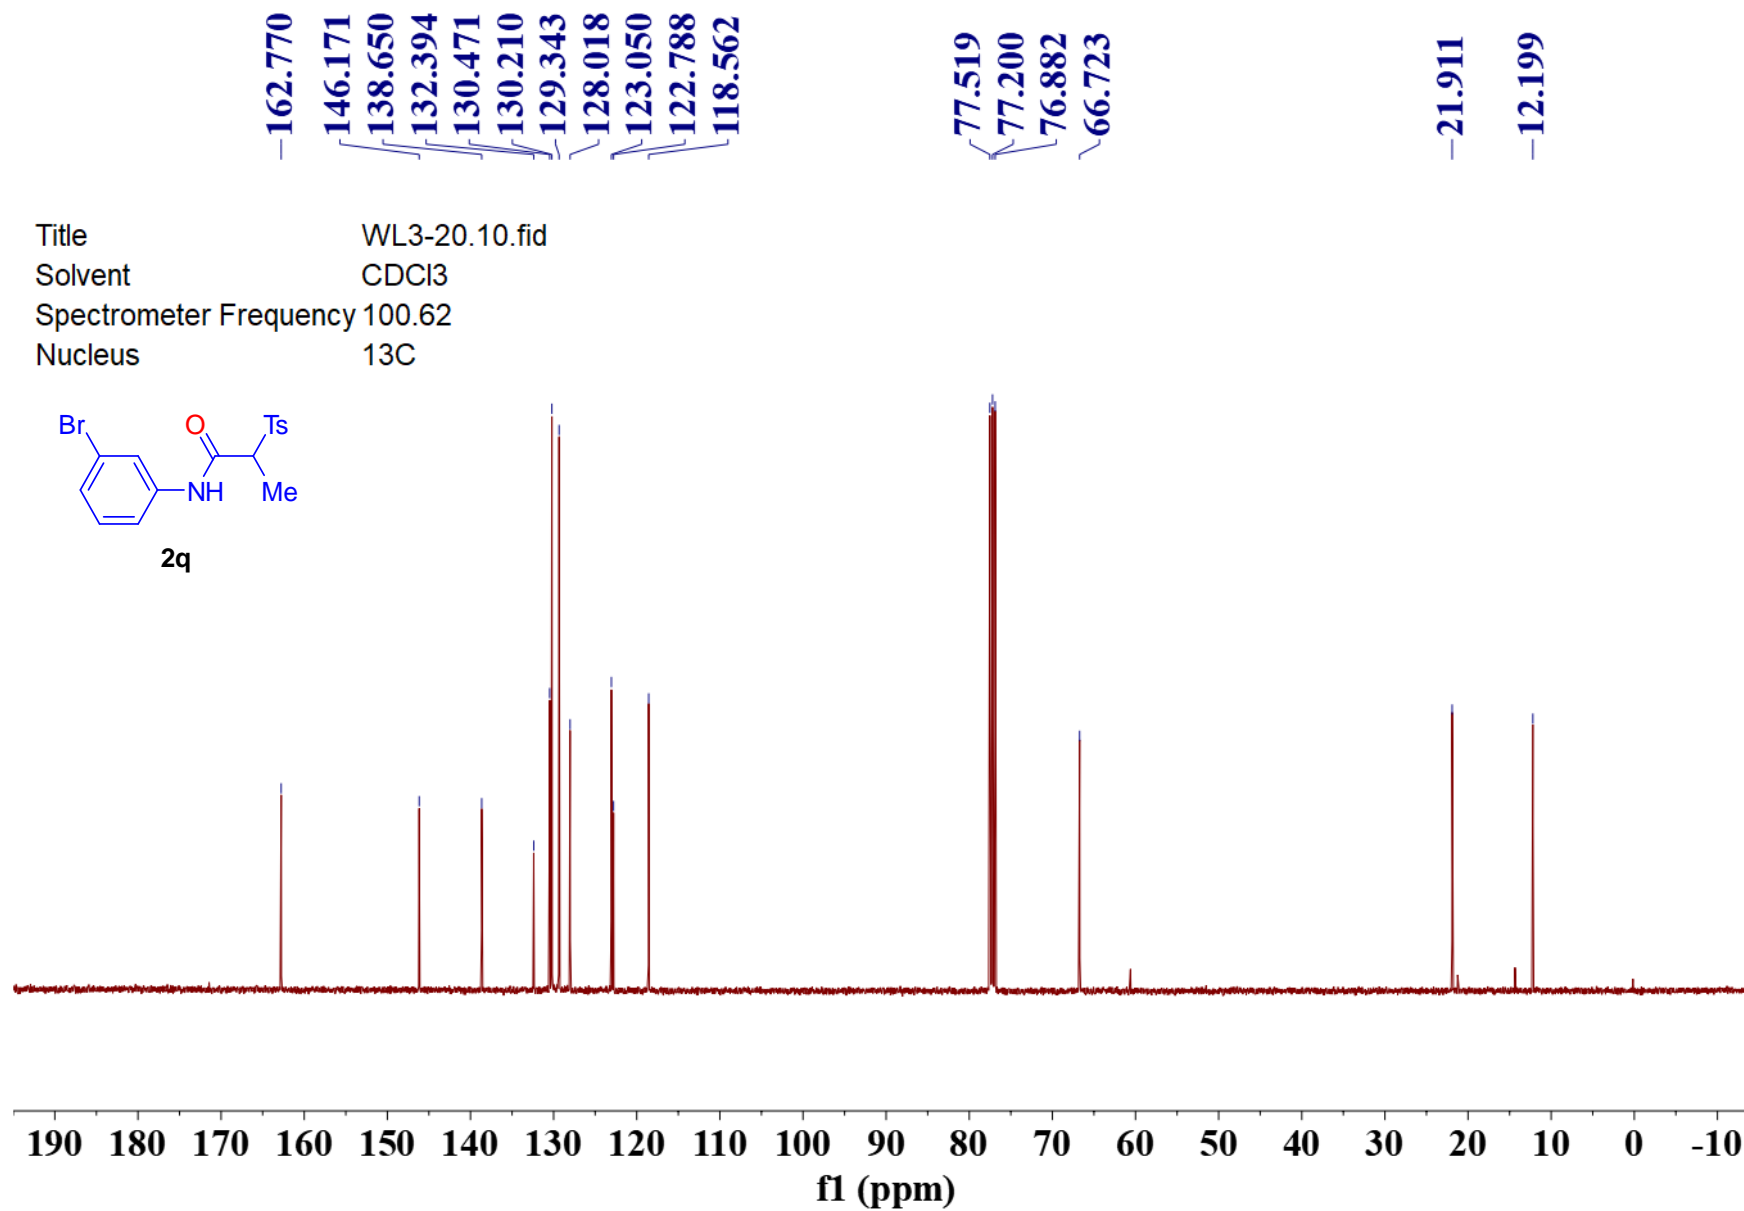

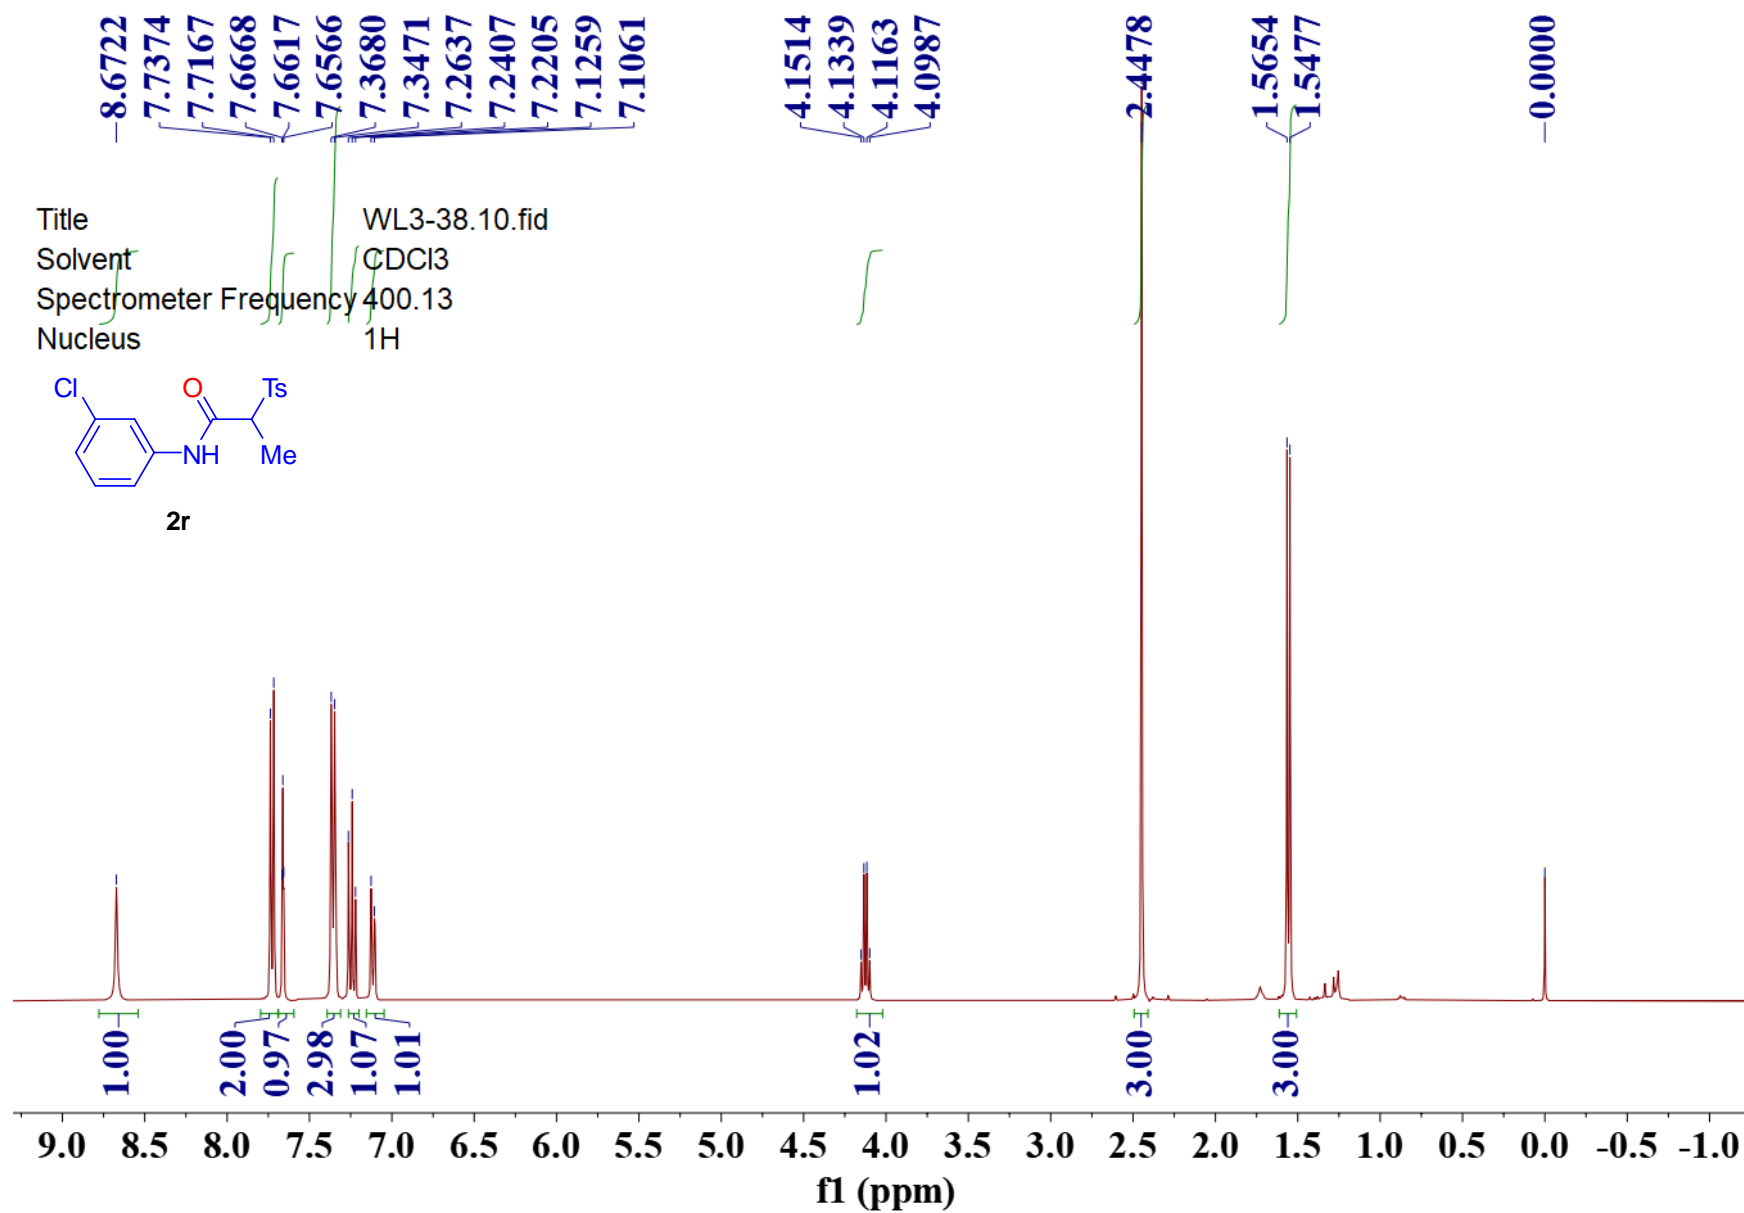



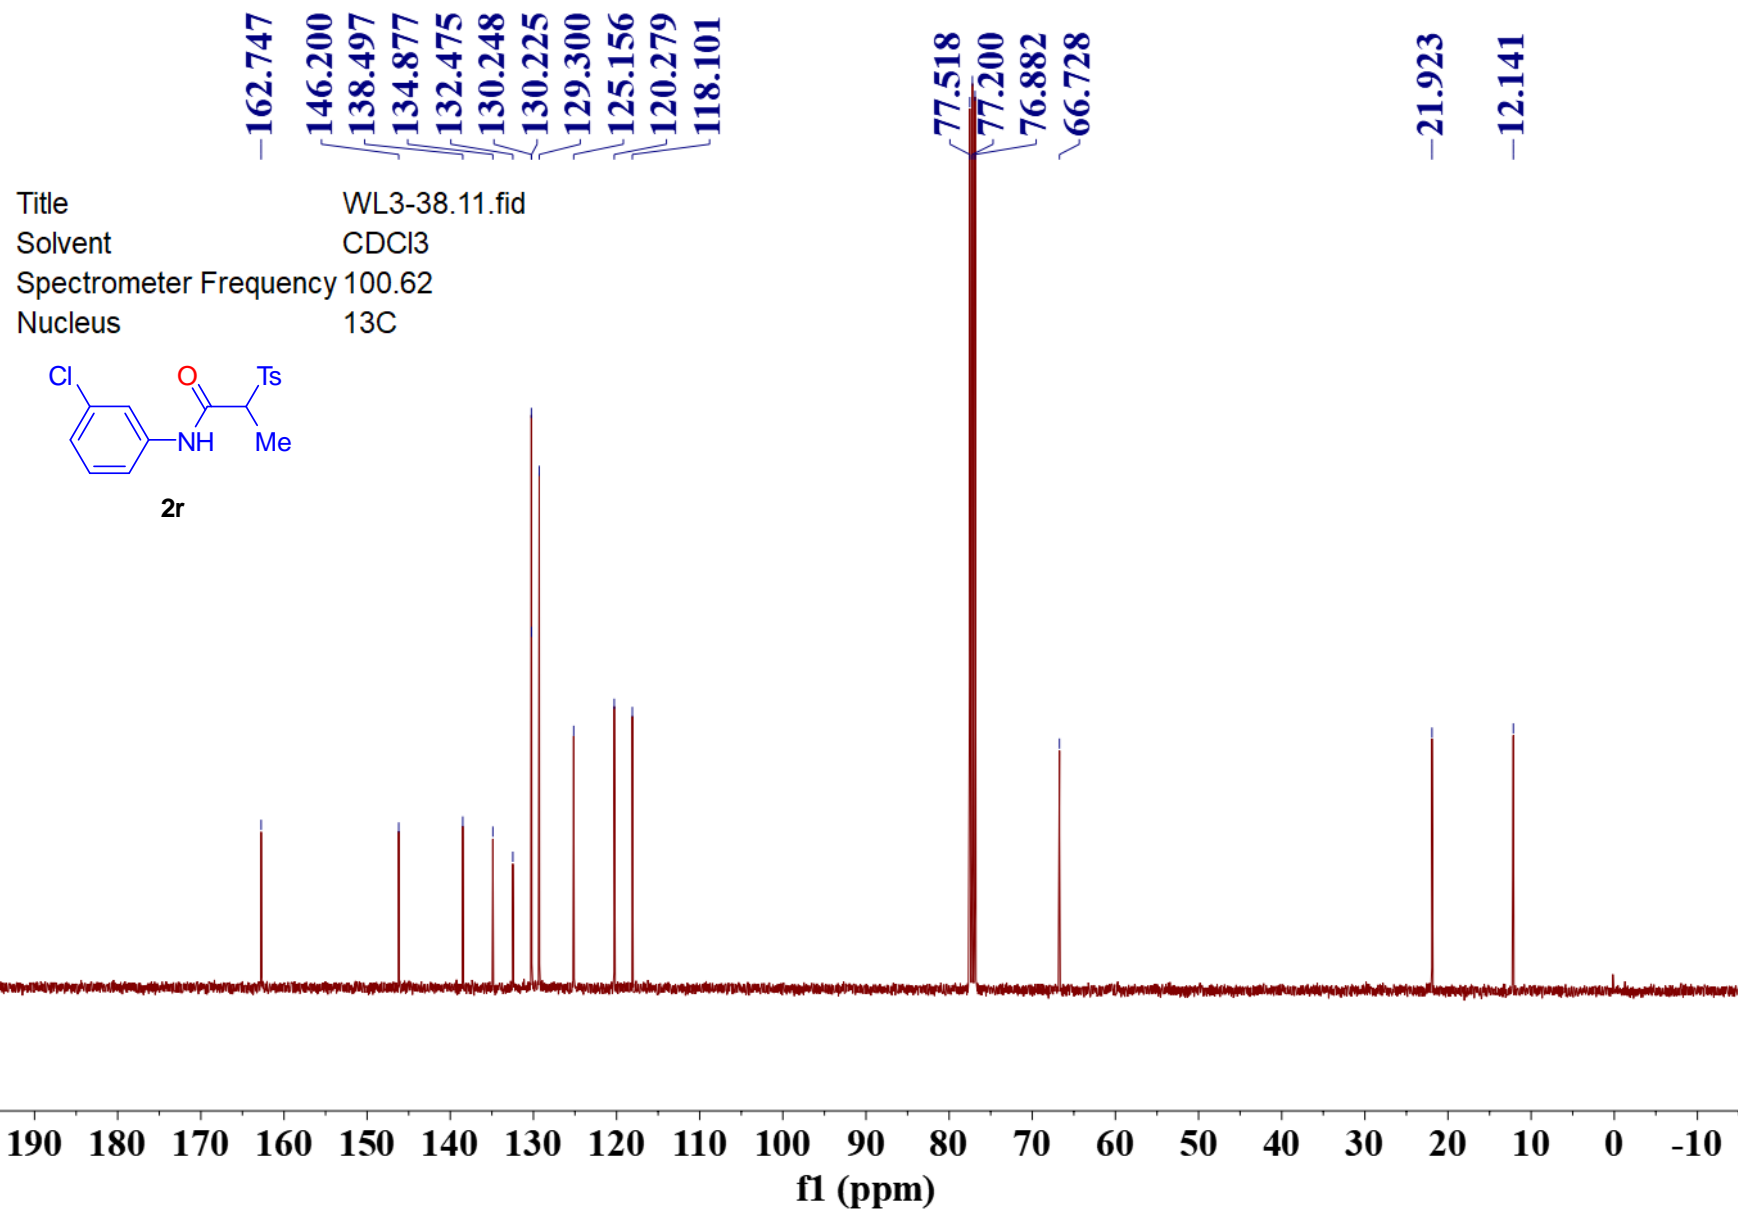

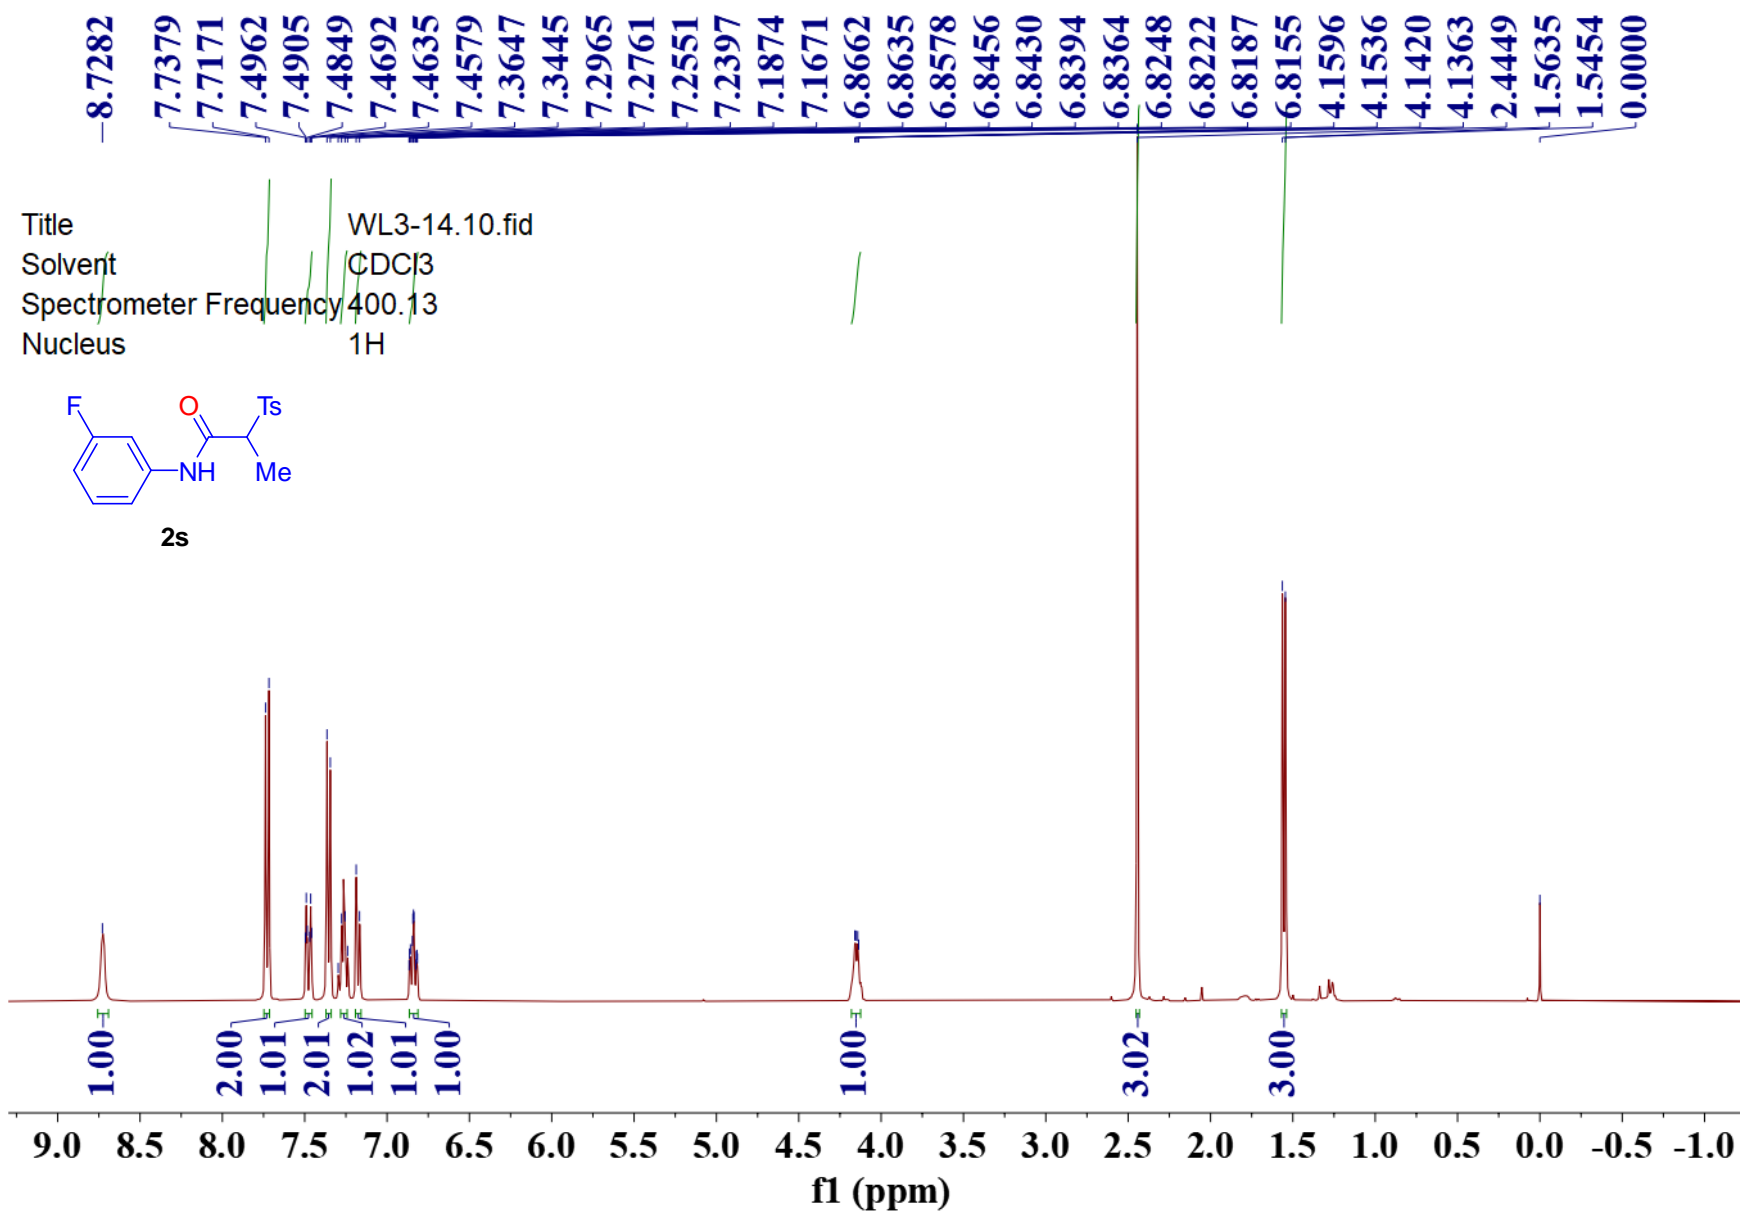

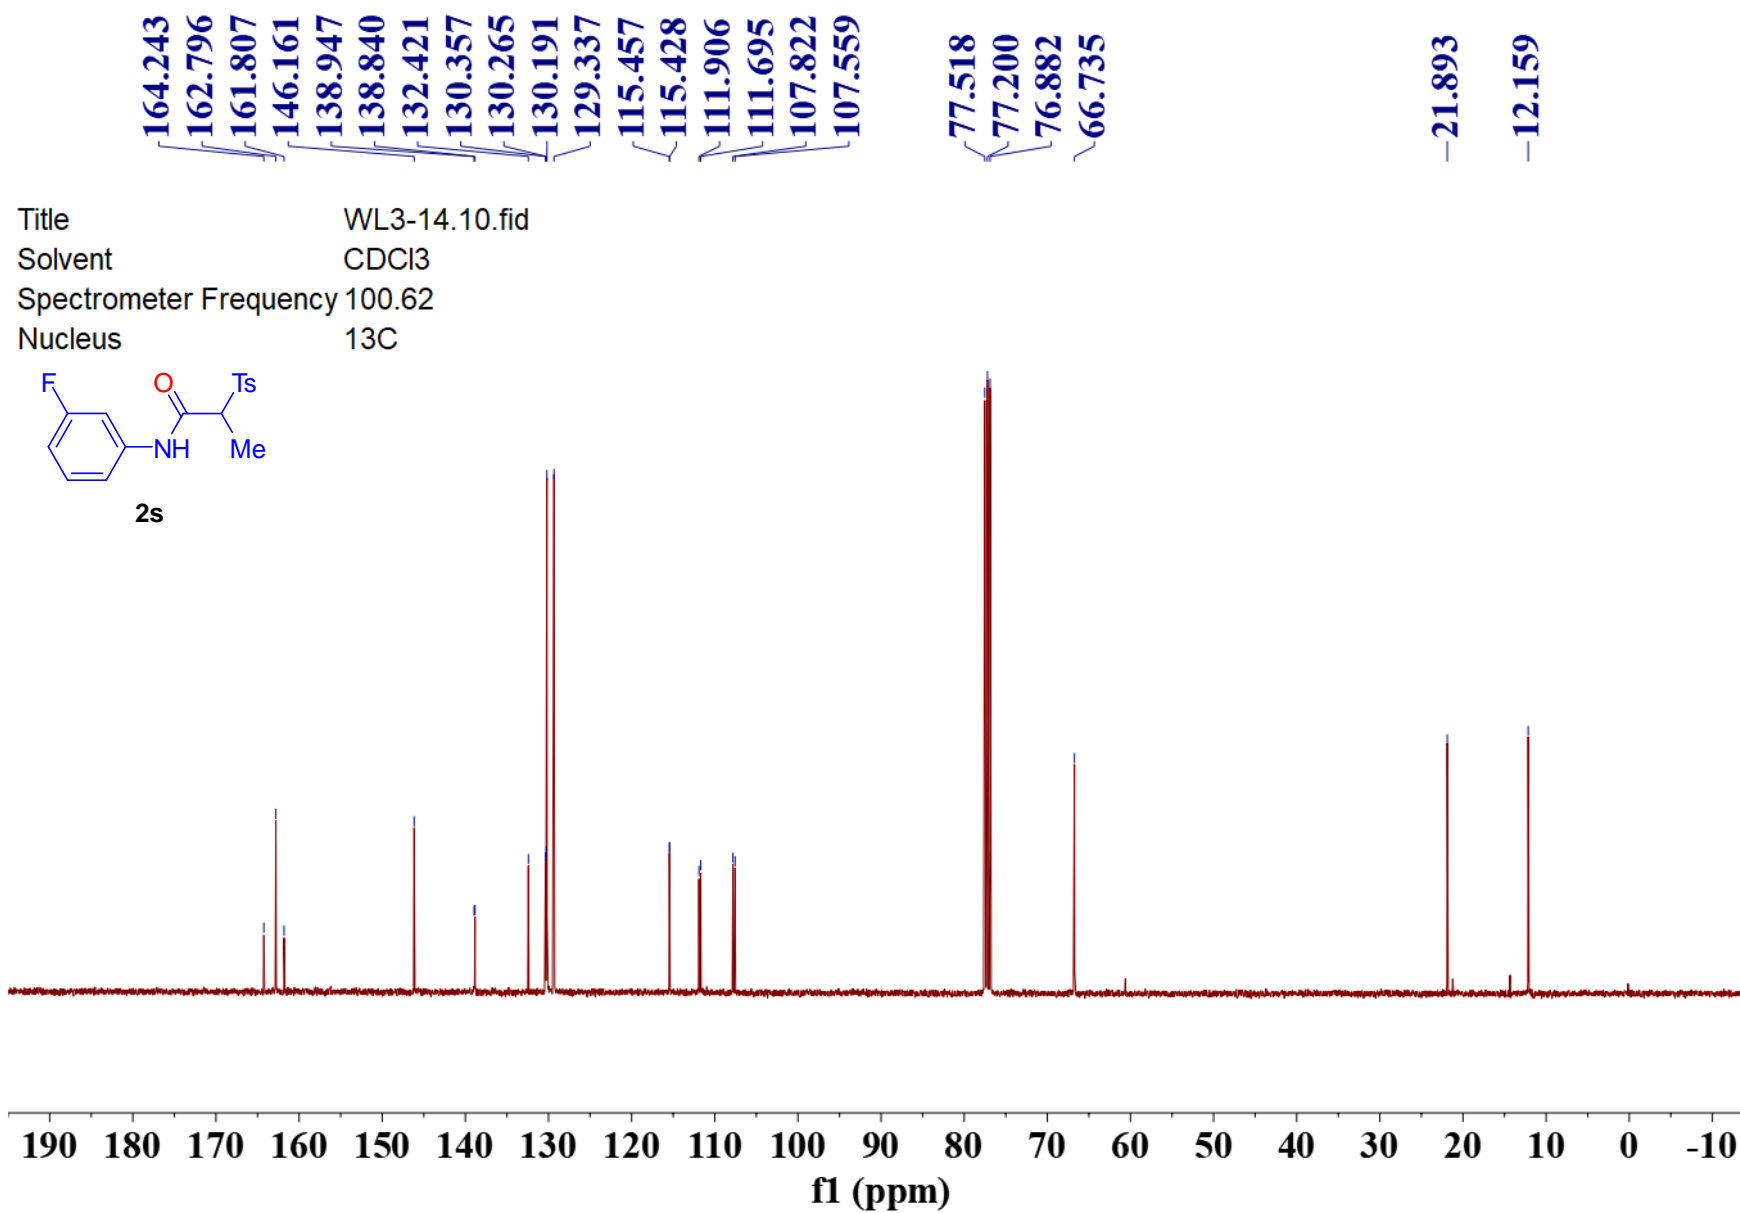

Title WL3-14.10.fid  
Solvent CDCl3  
Spectrometer Frequency 376.46  
Nucleus 19F

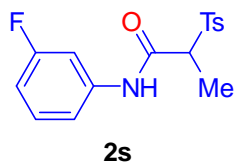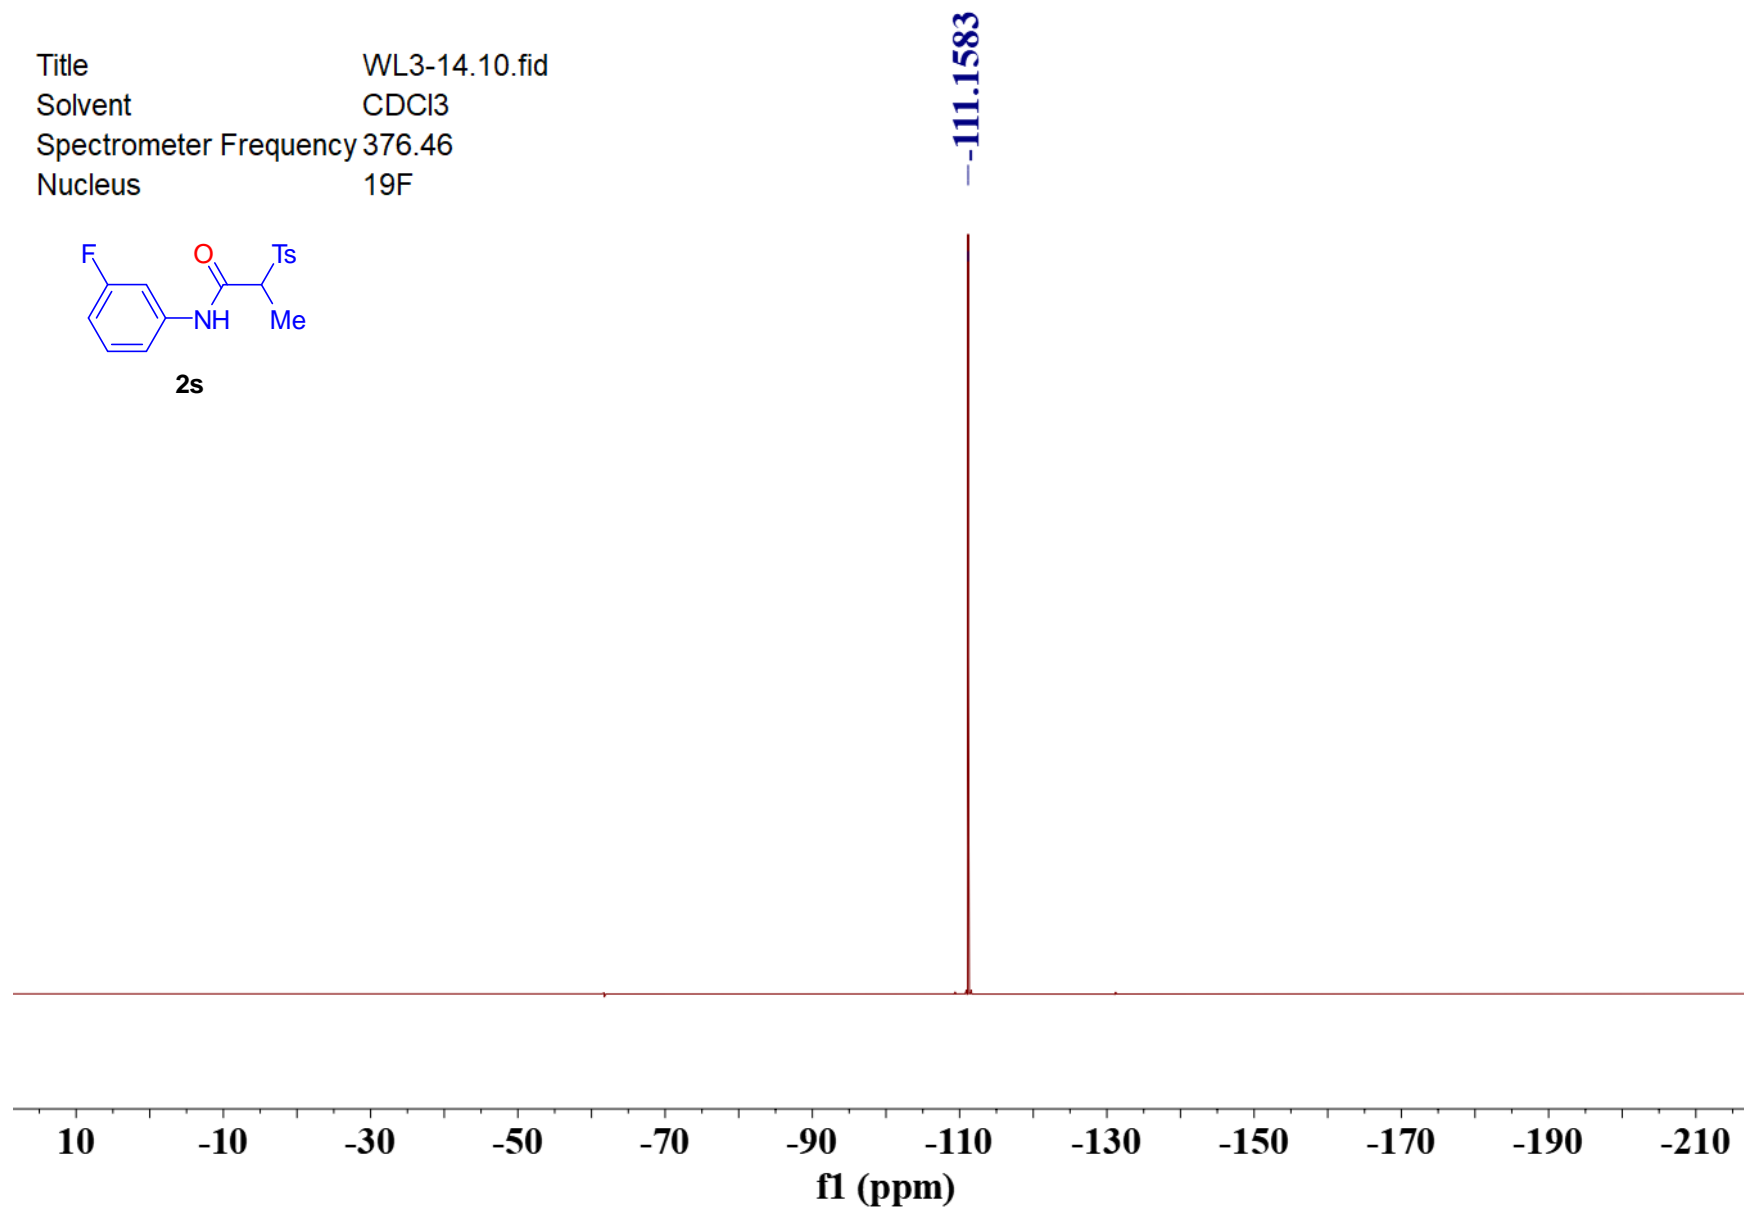

S127

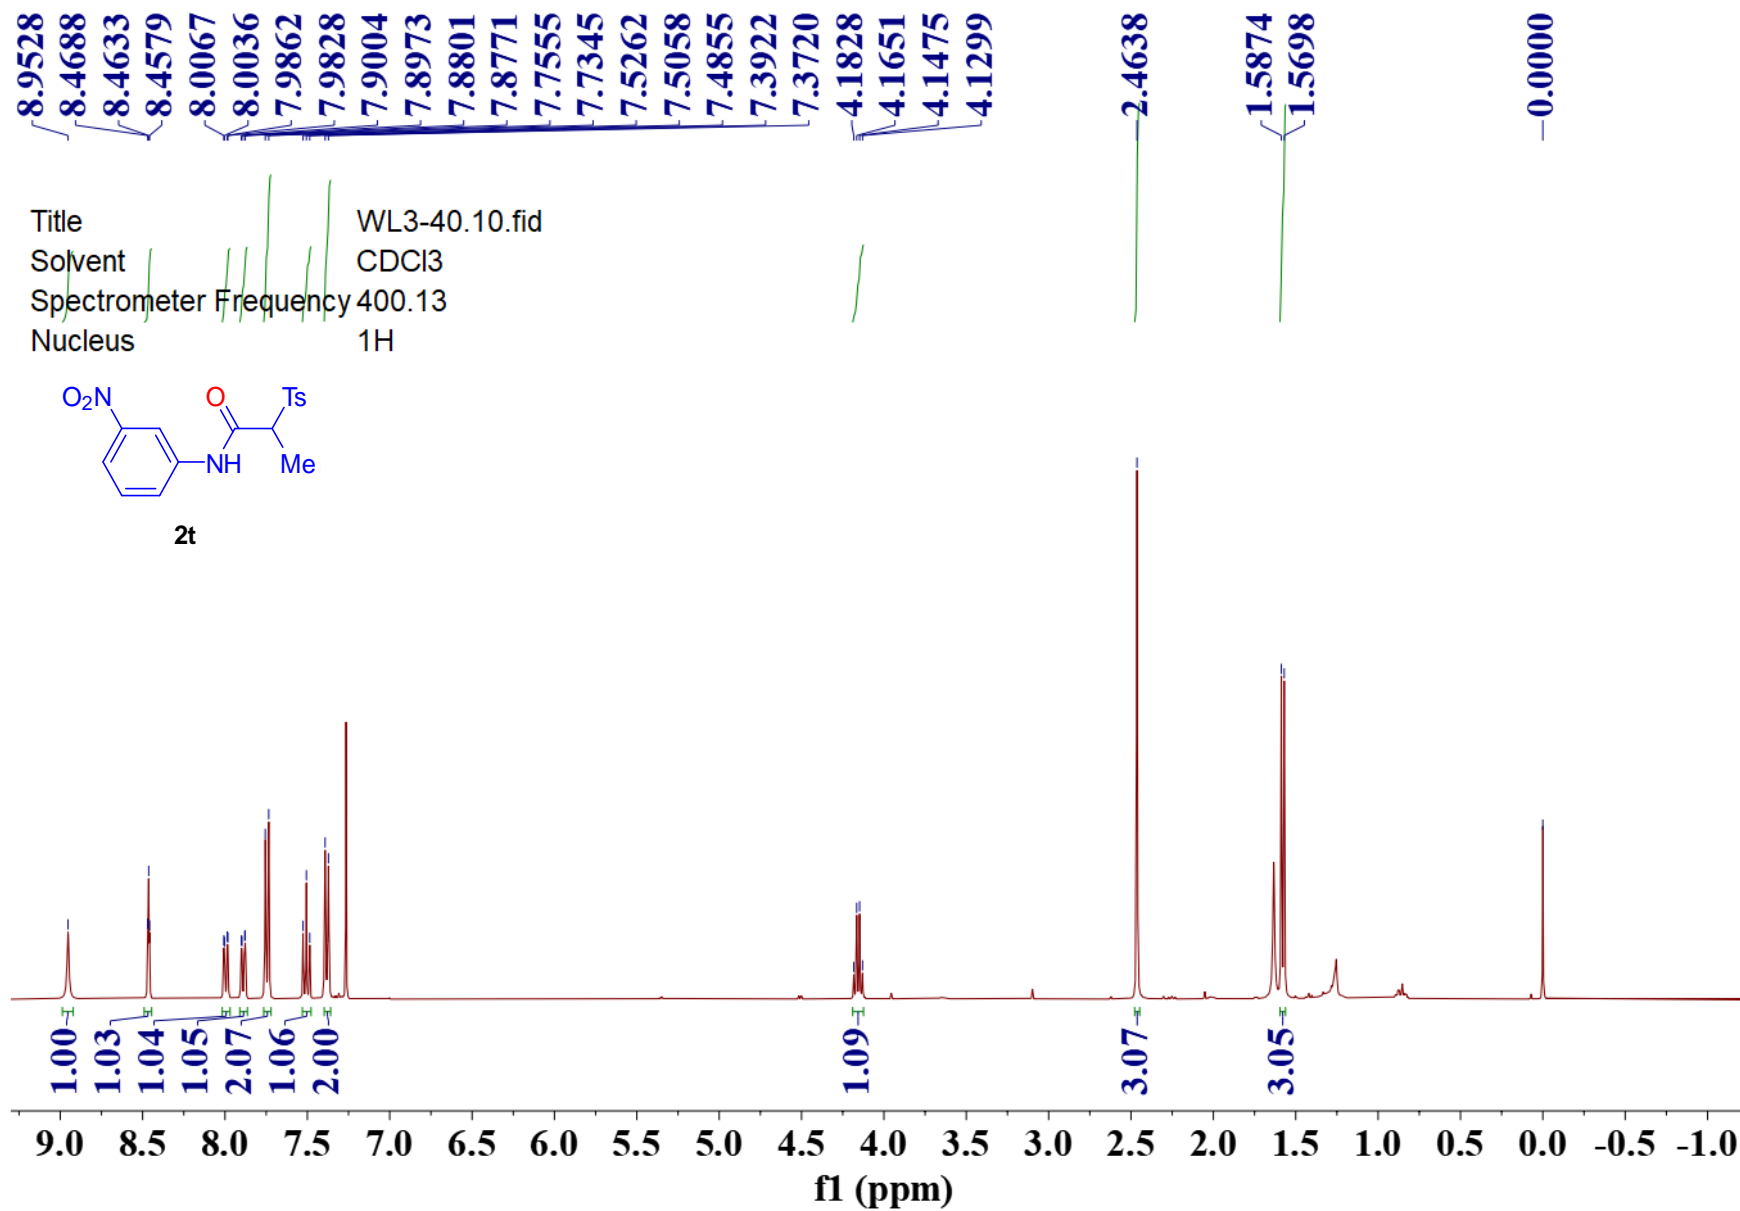

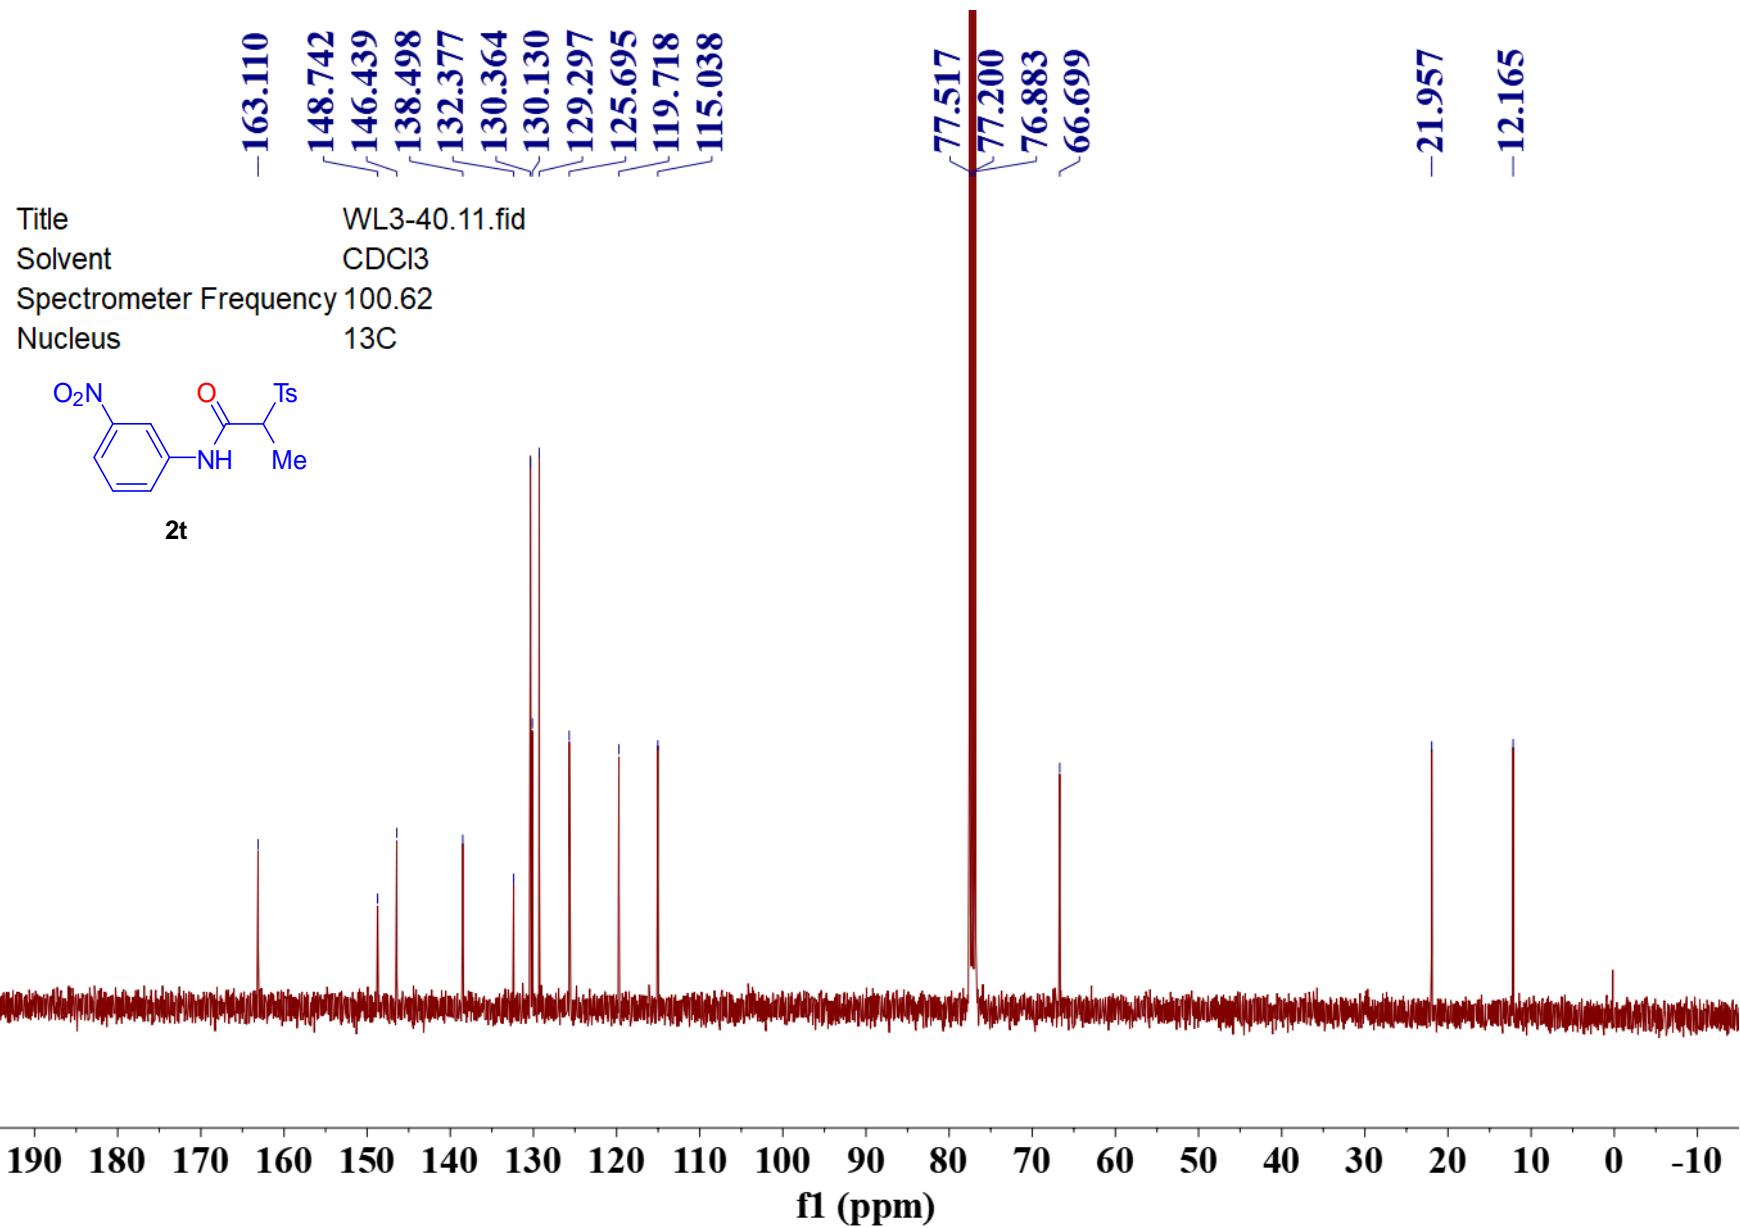

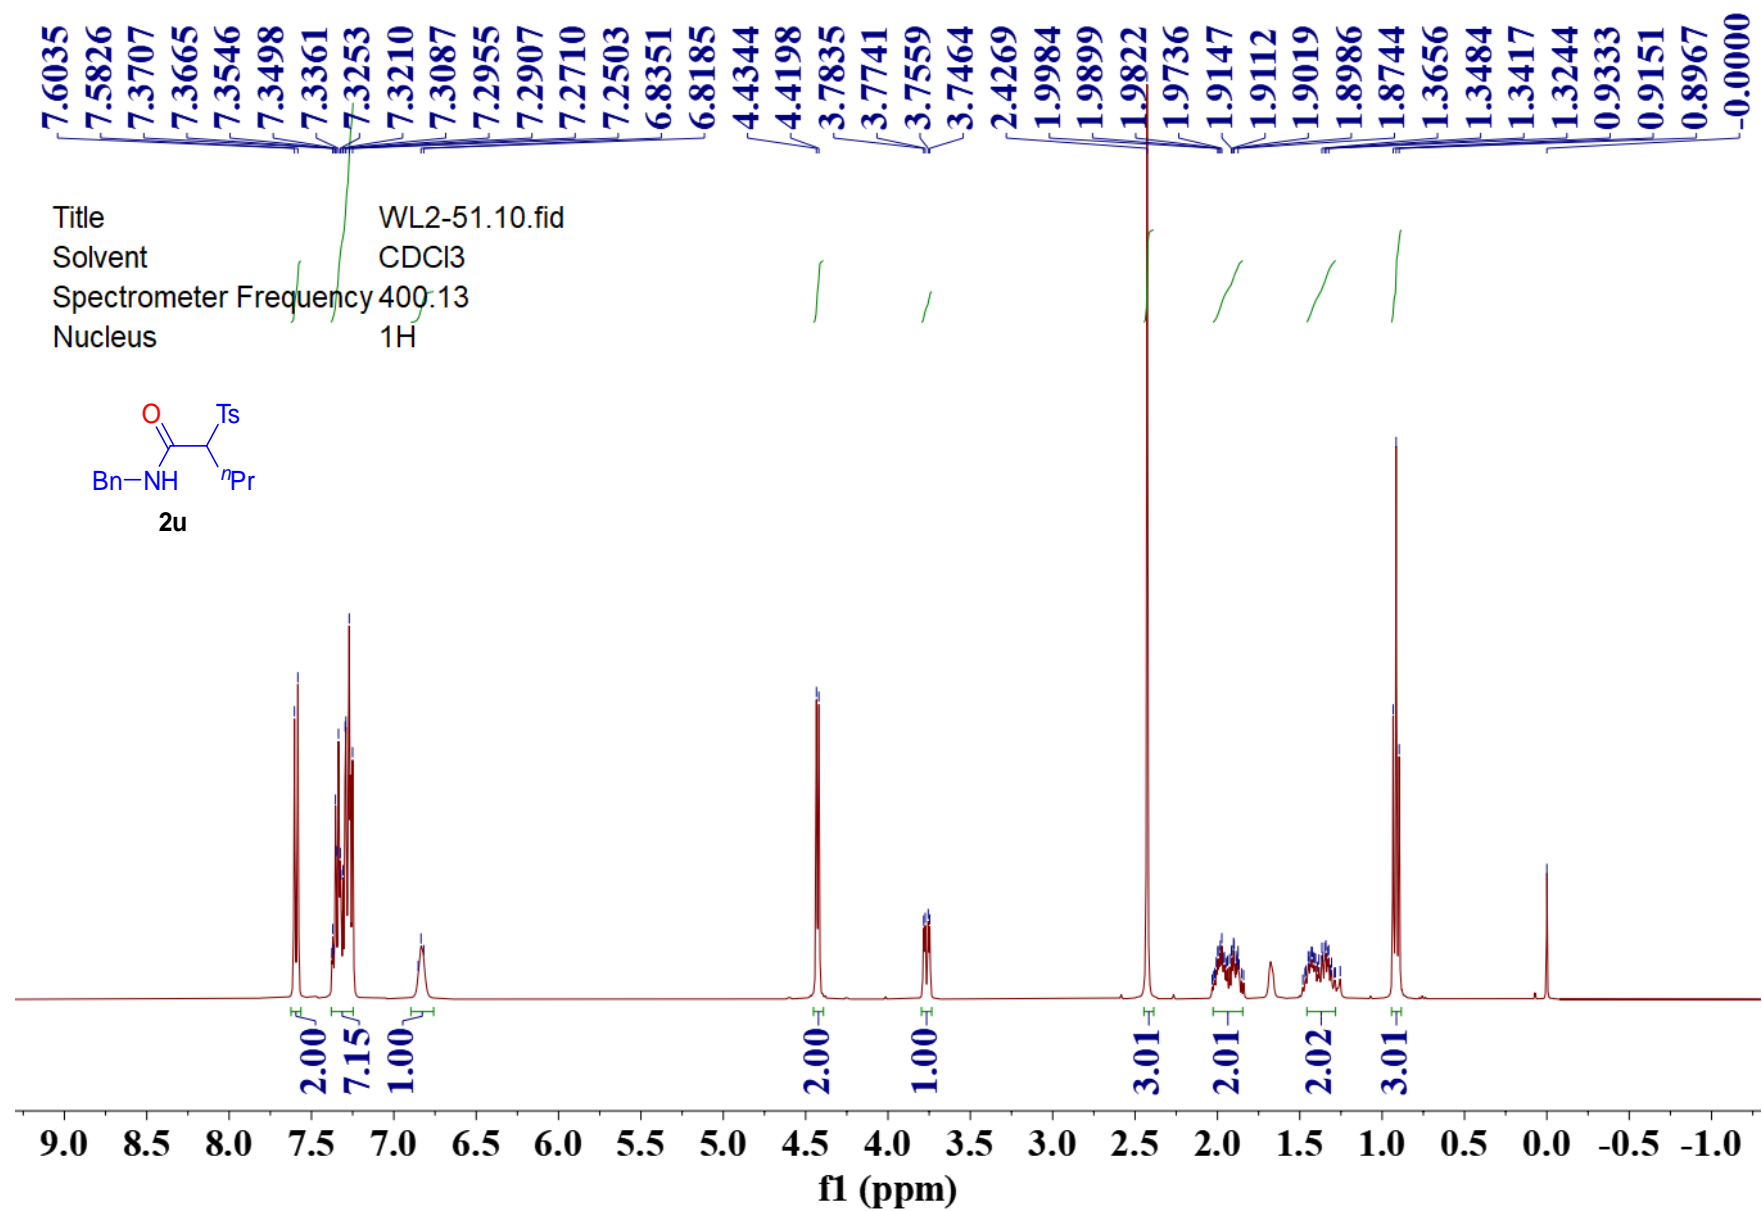

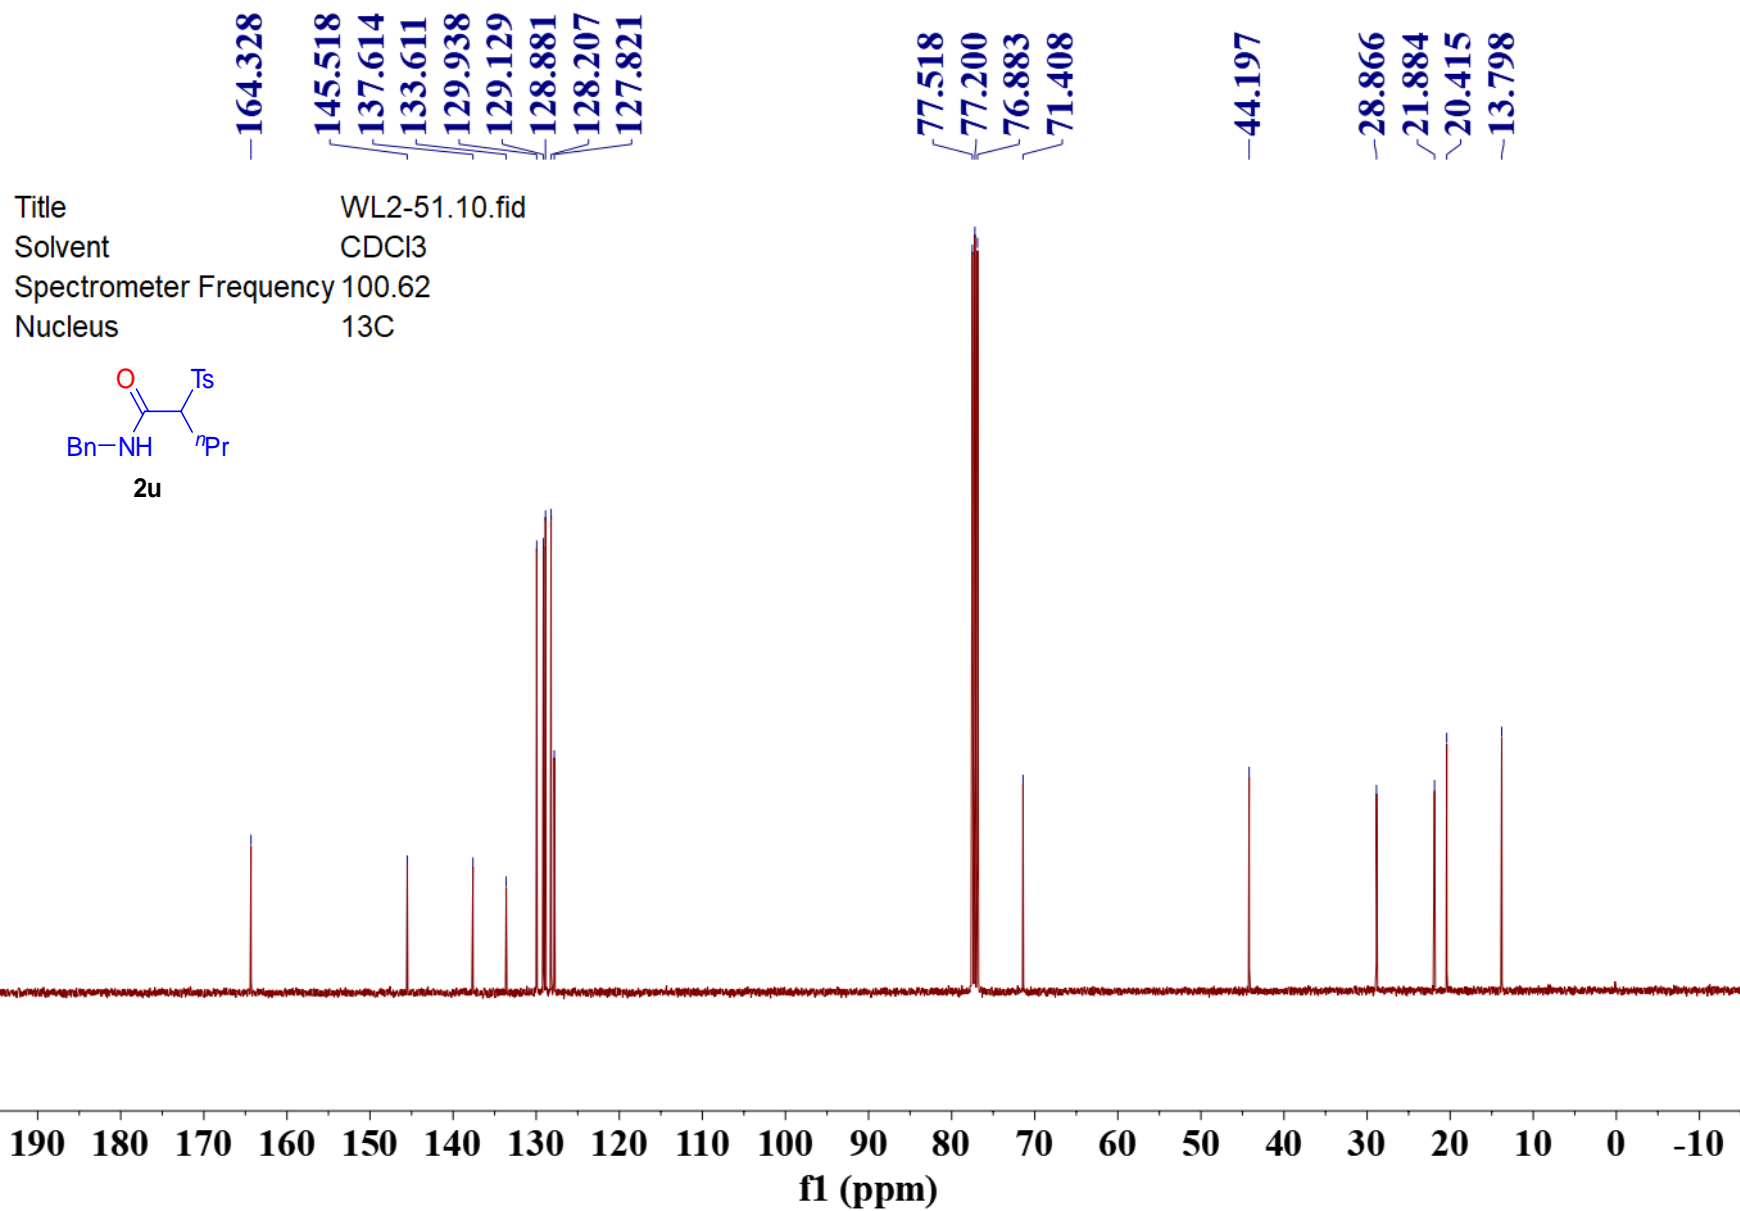



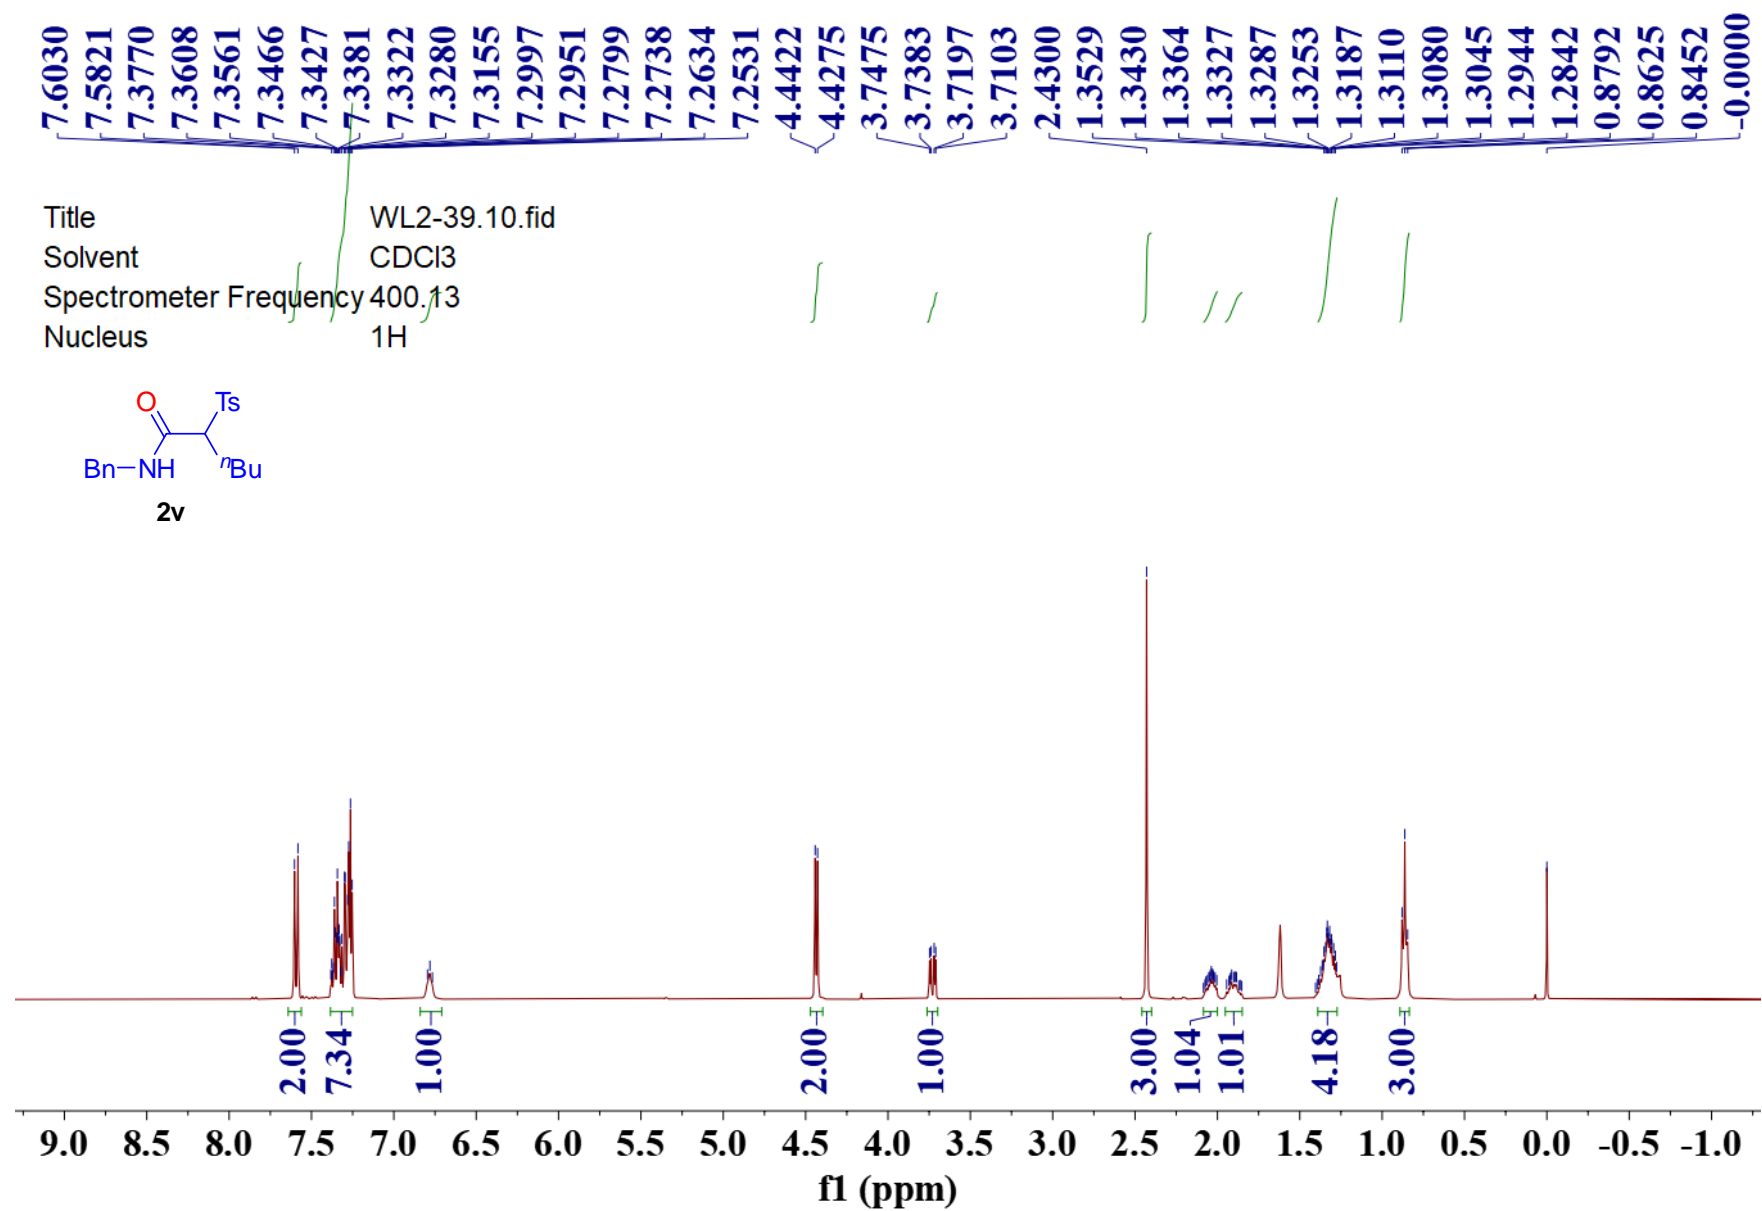

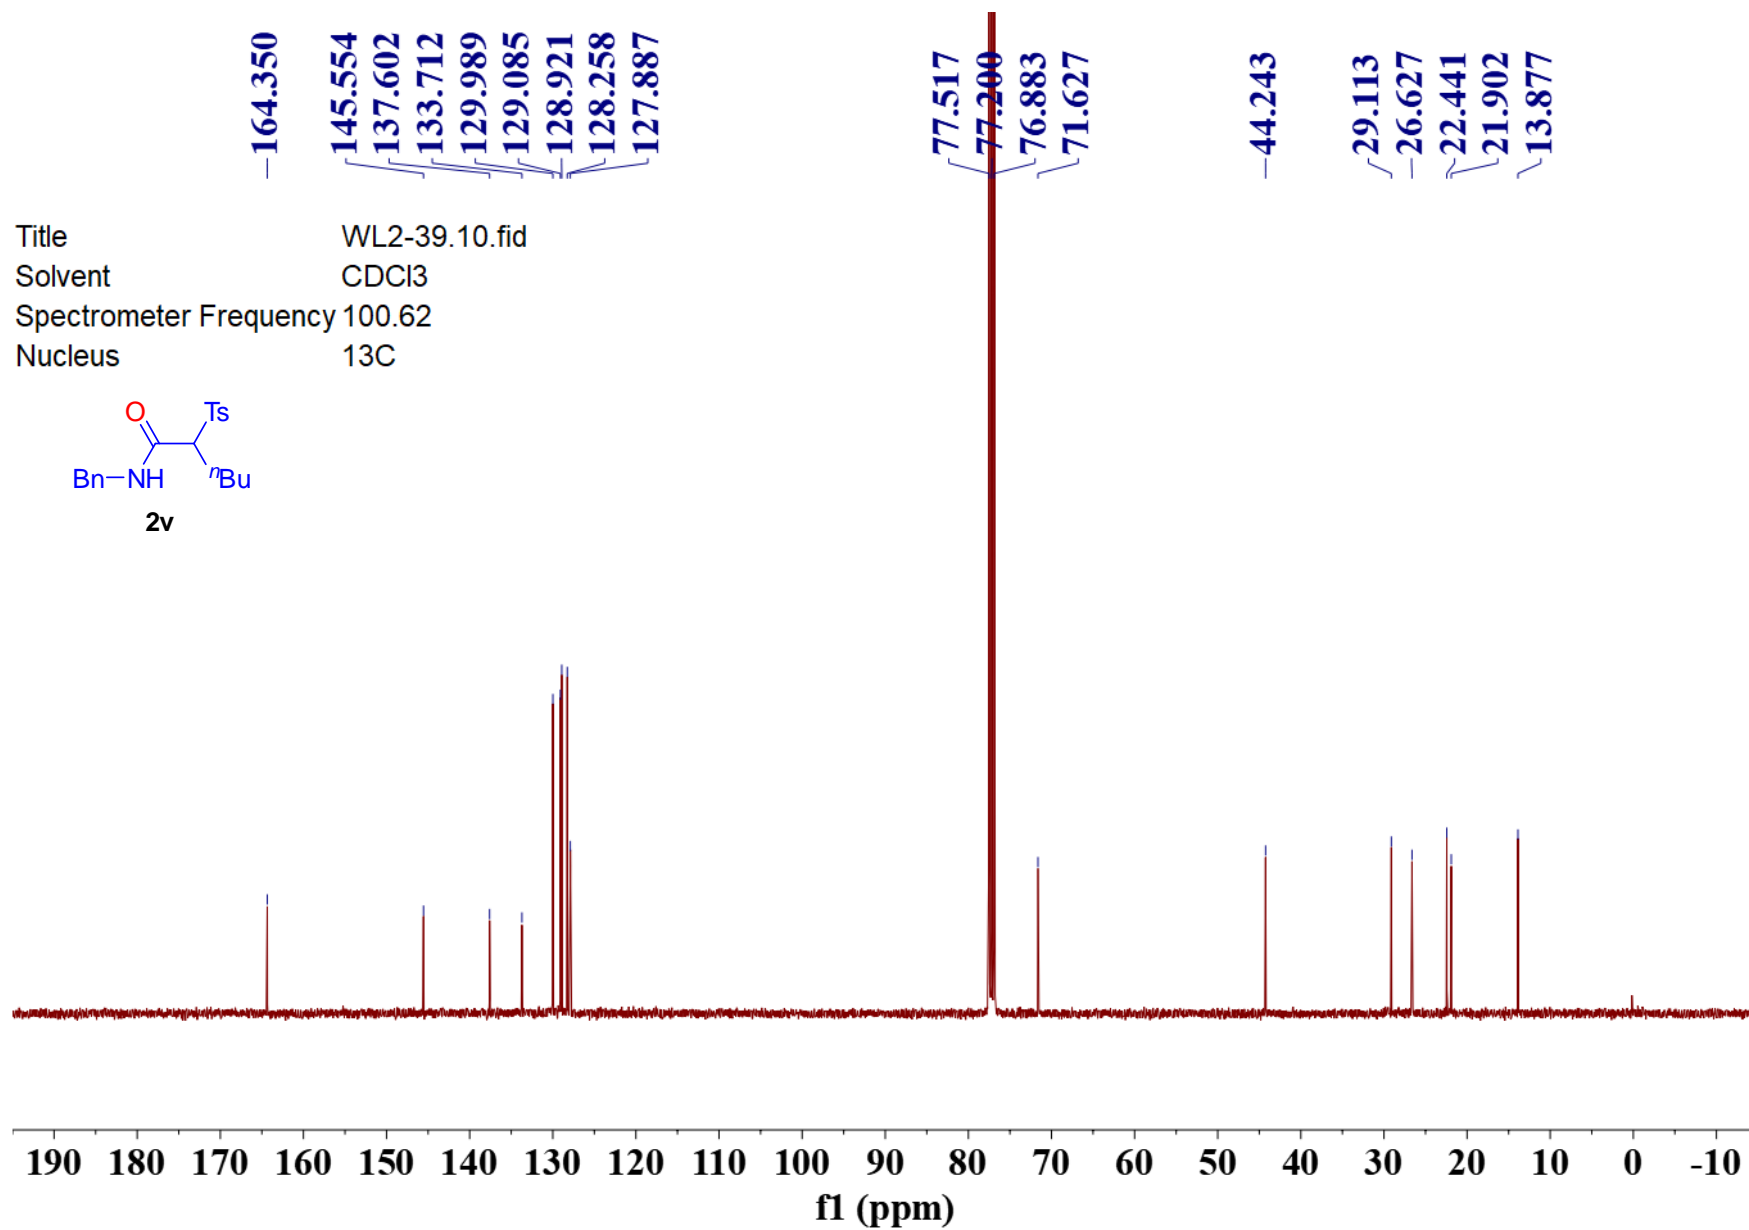

S133

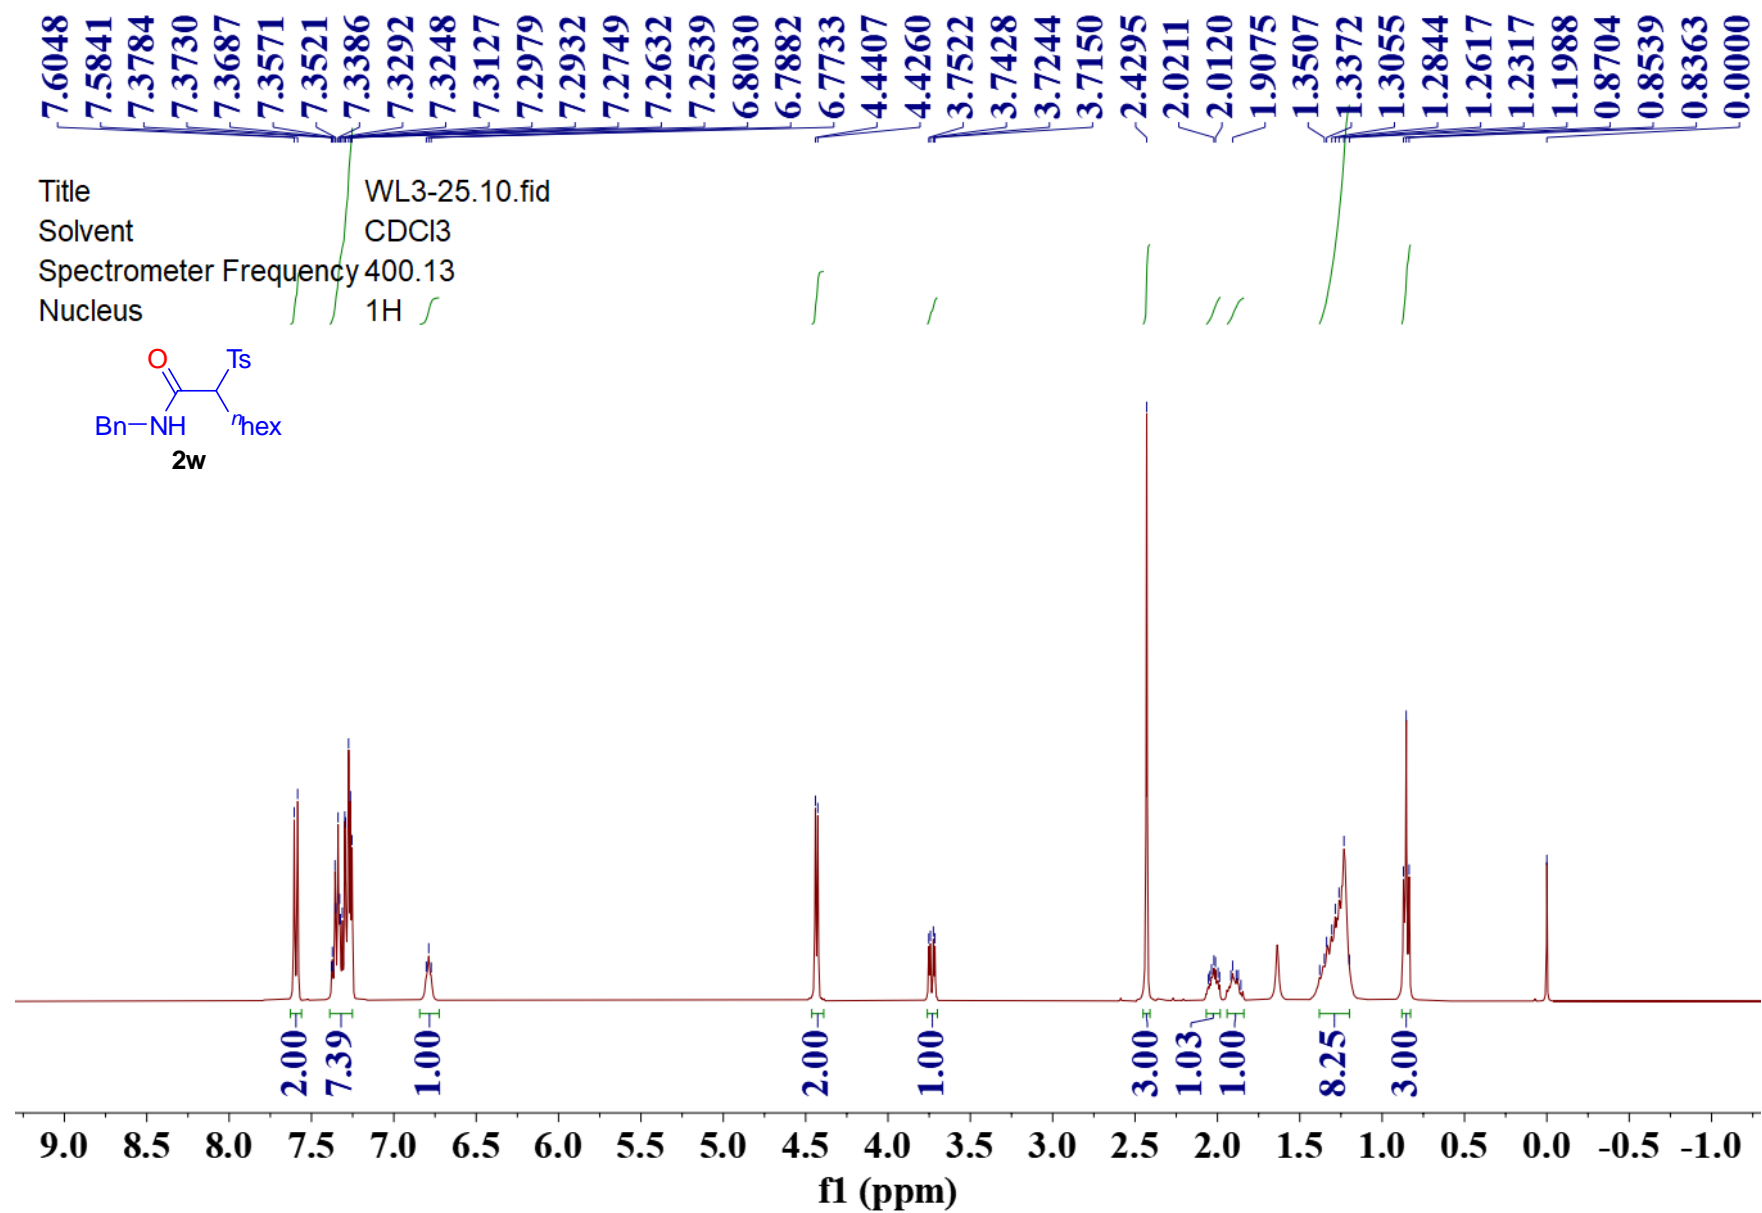

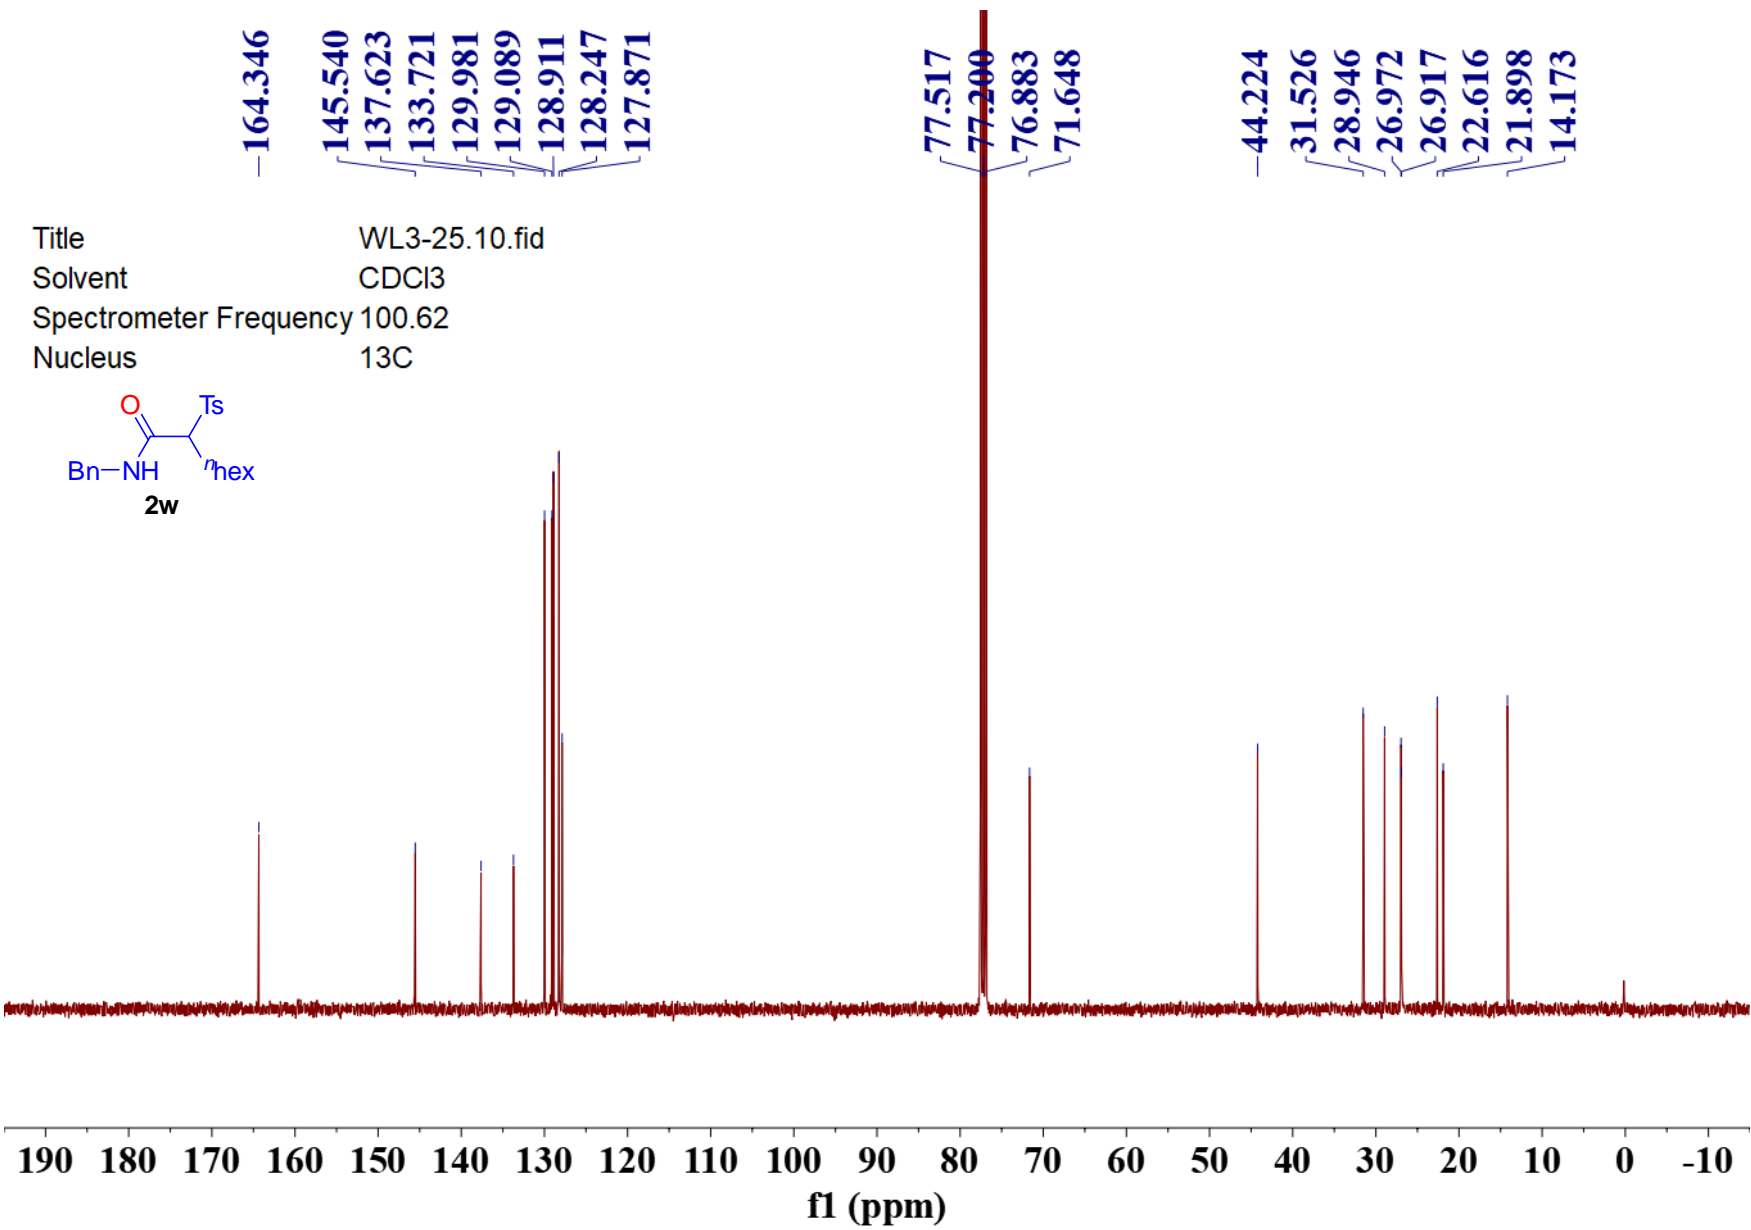

S135

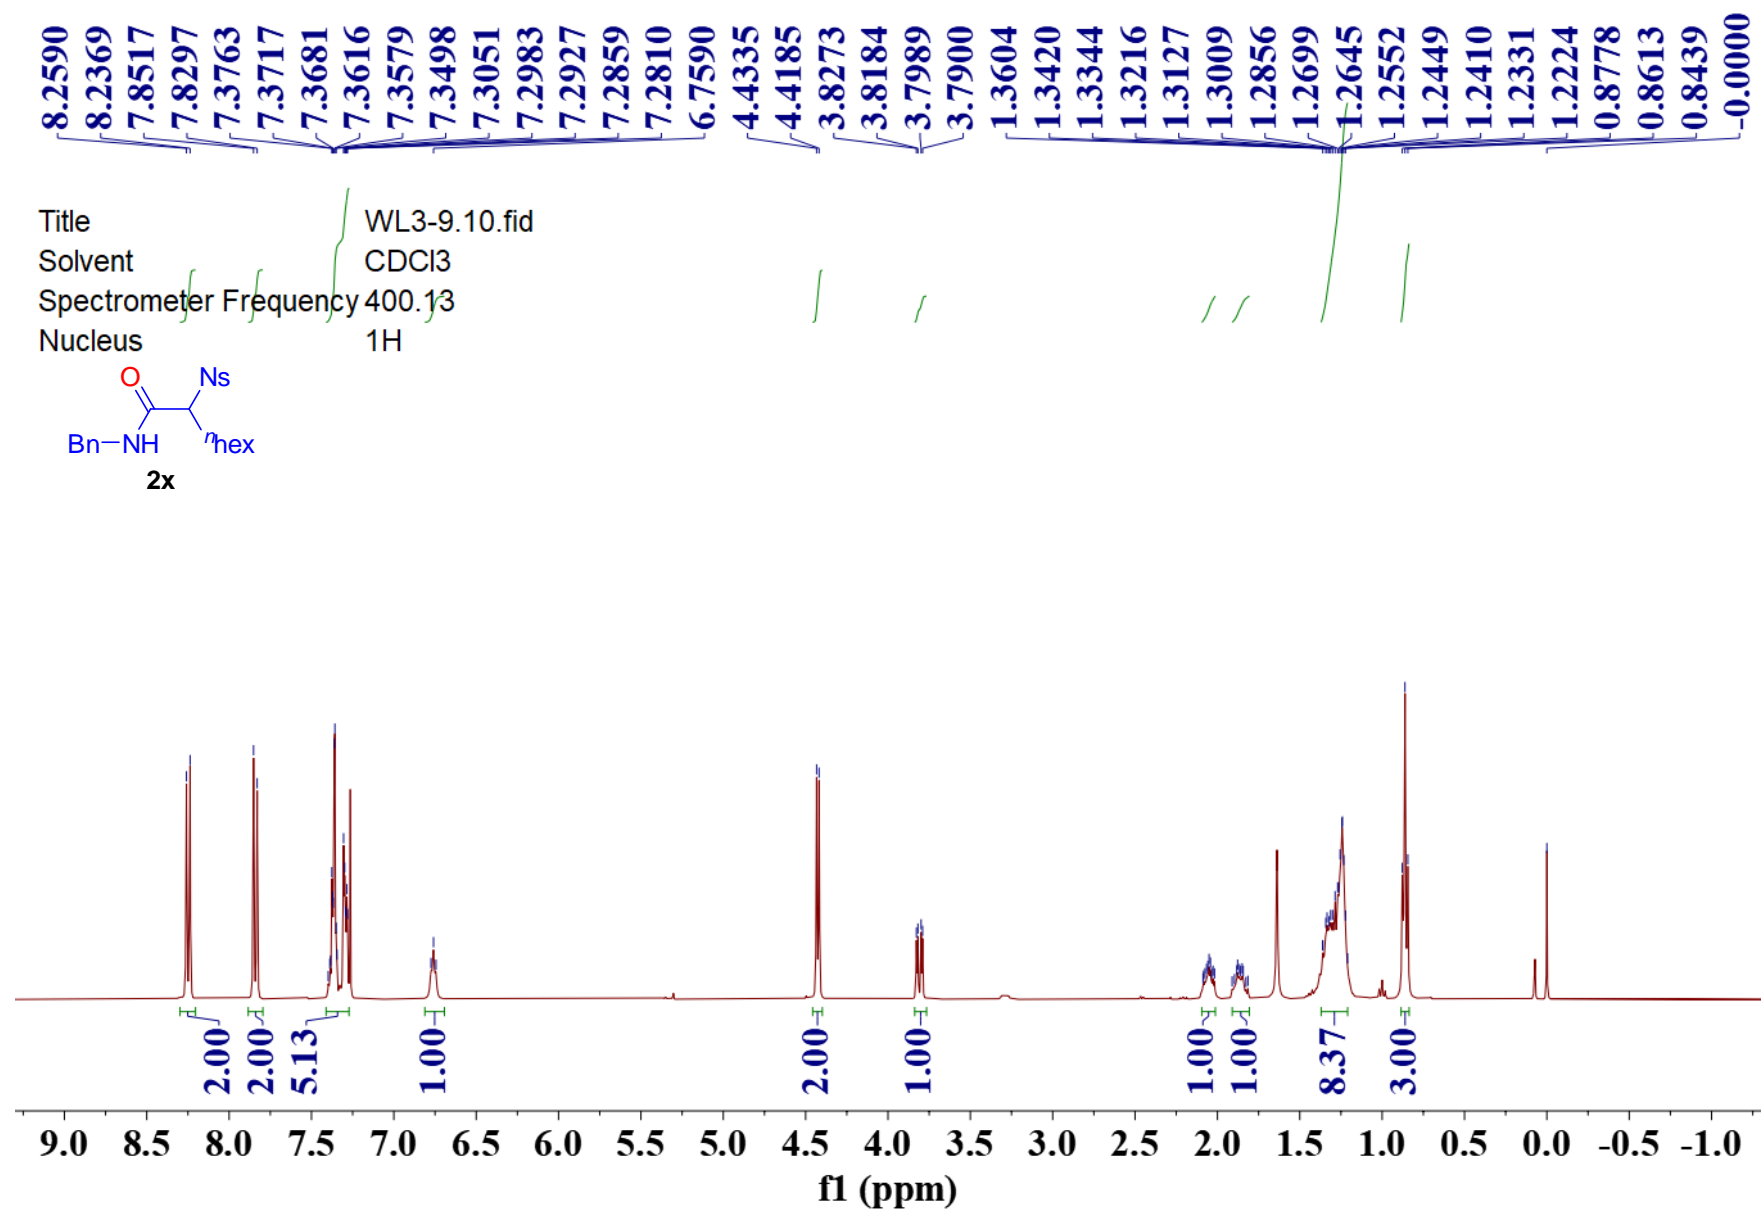

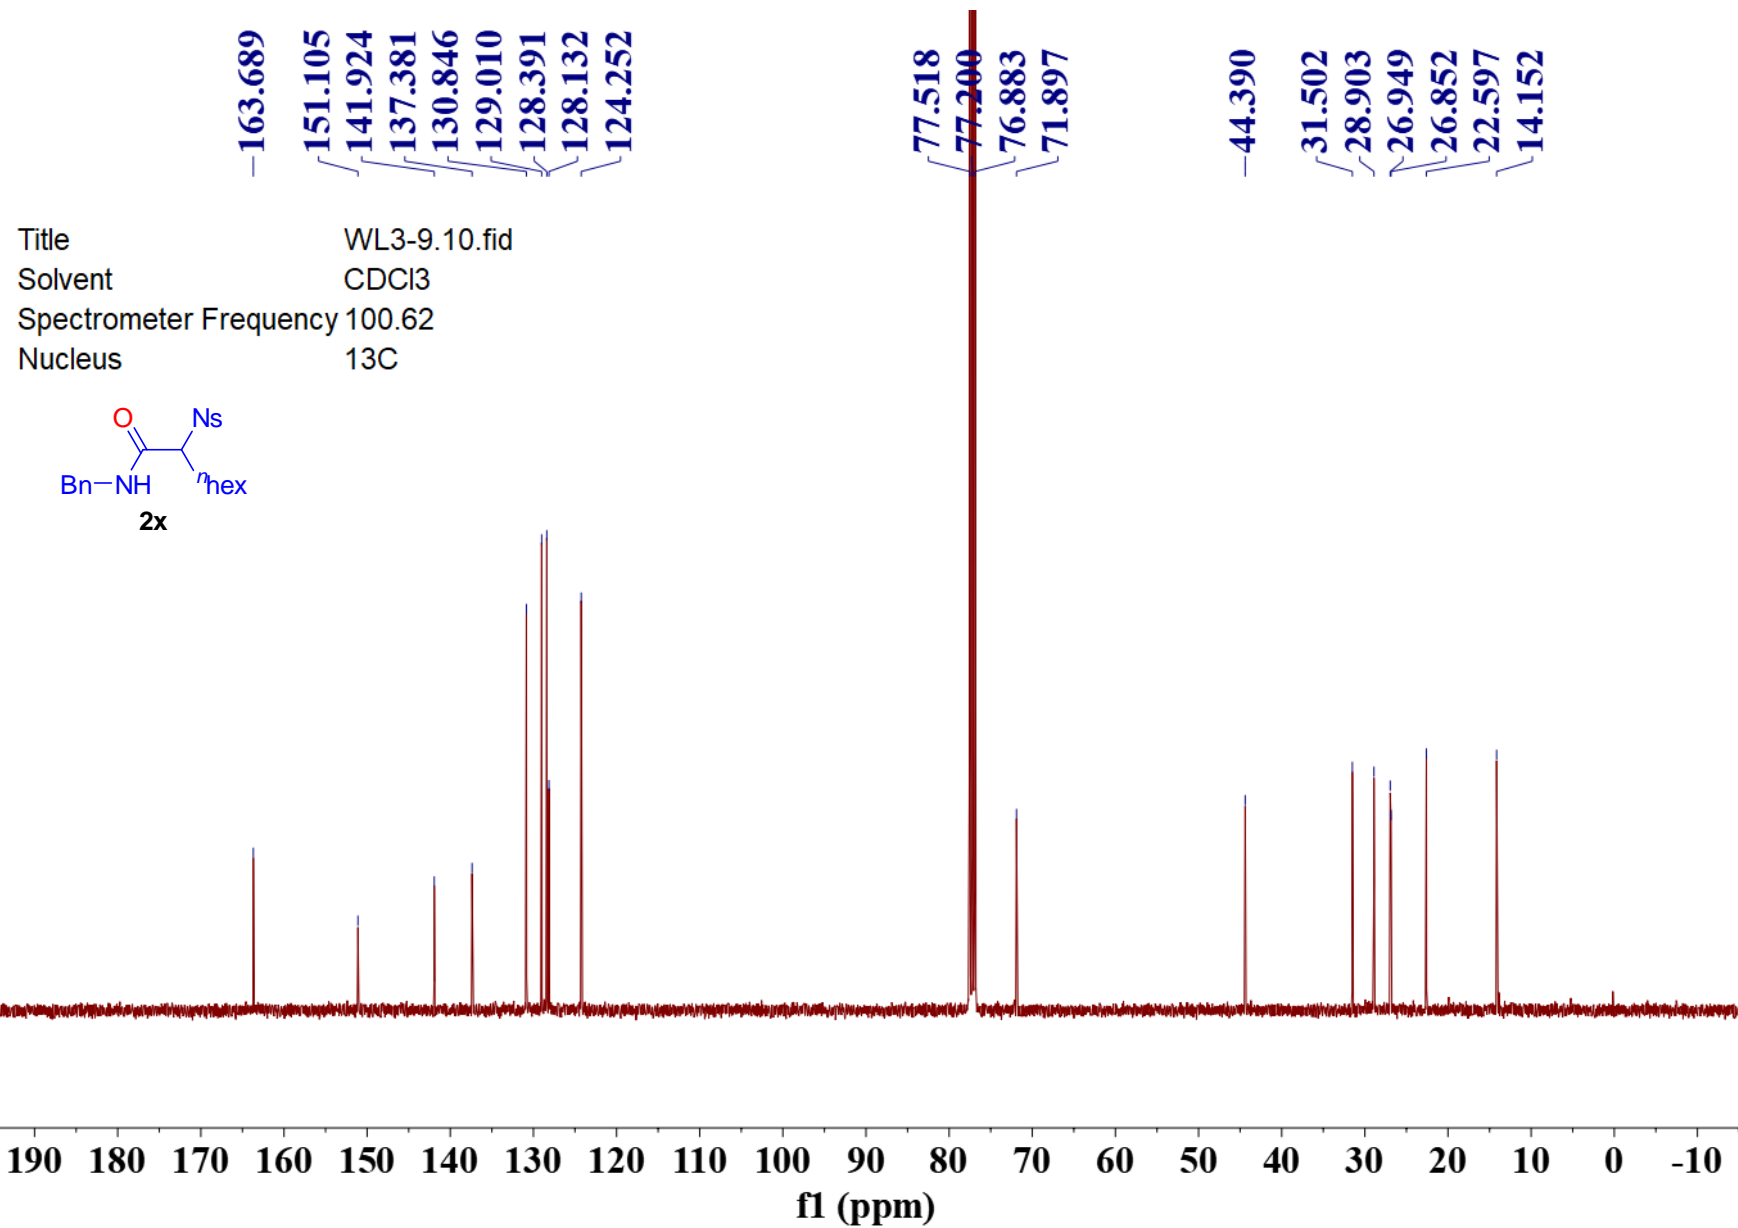

S137

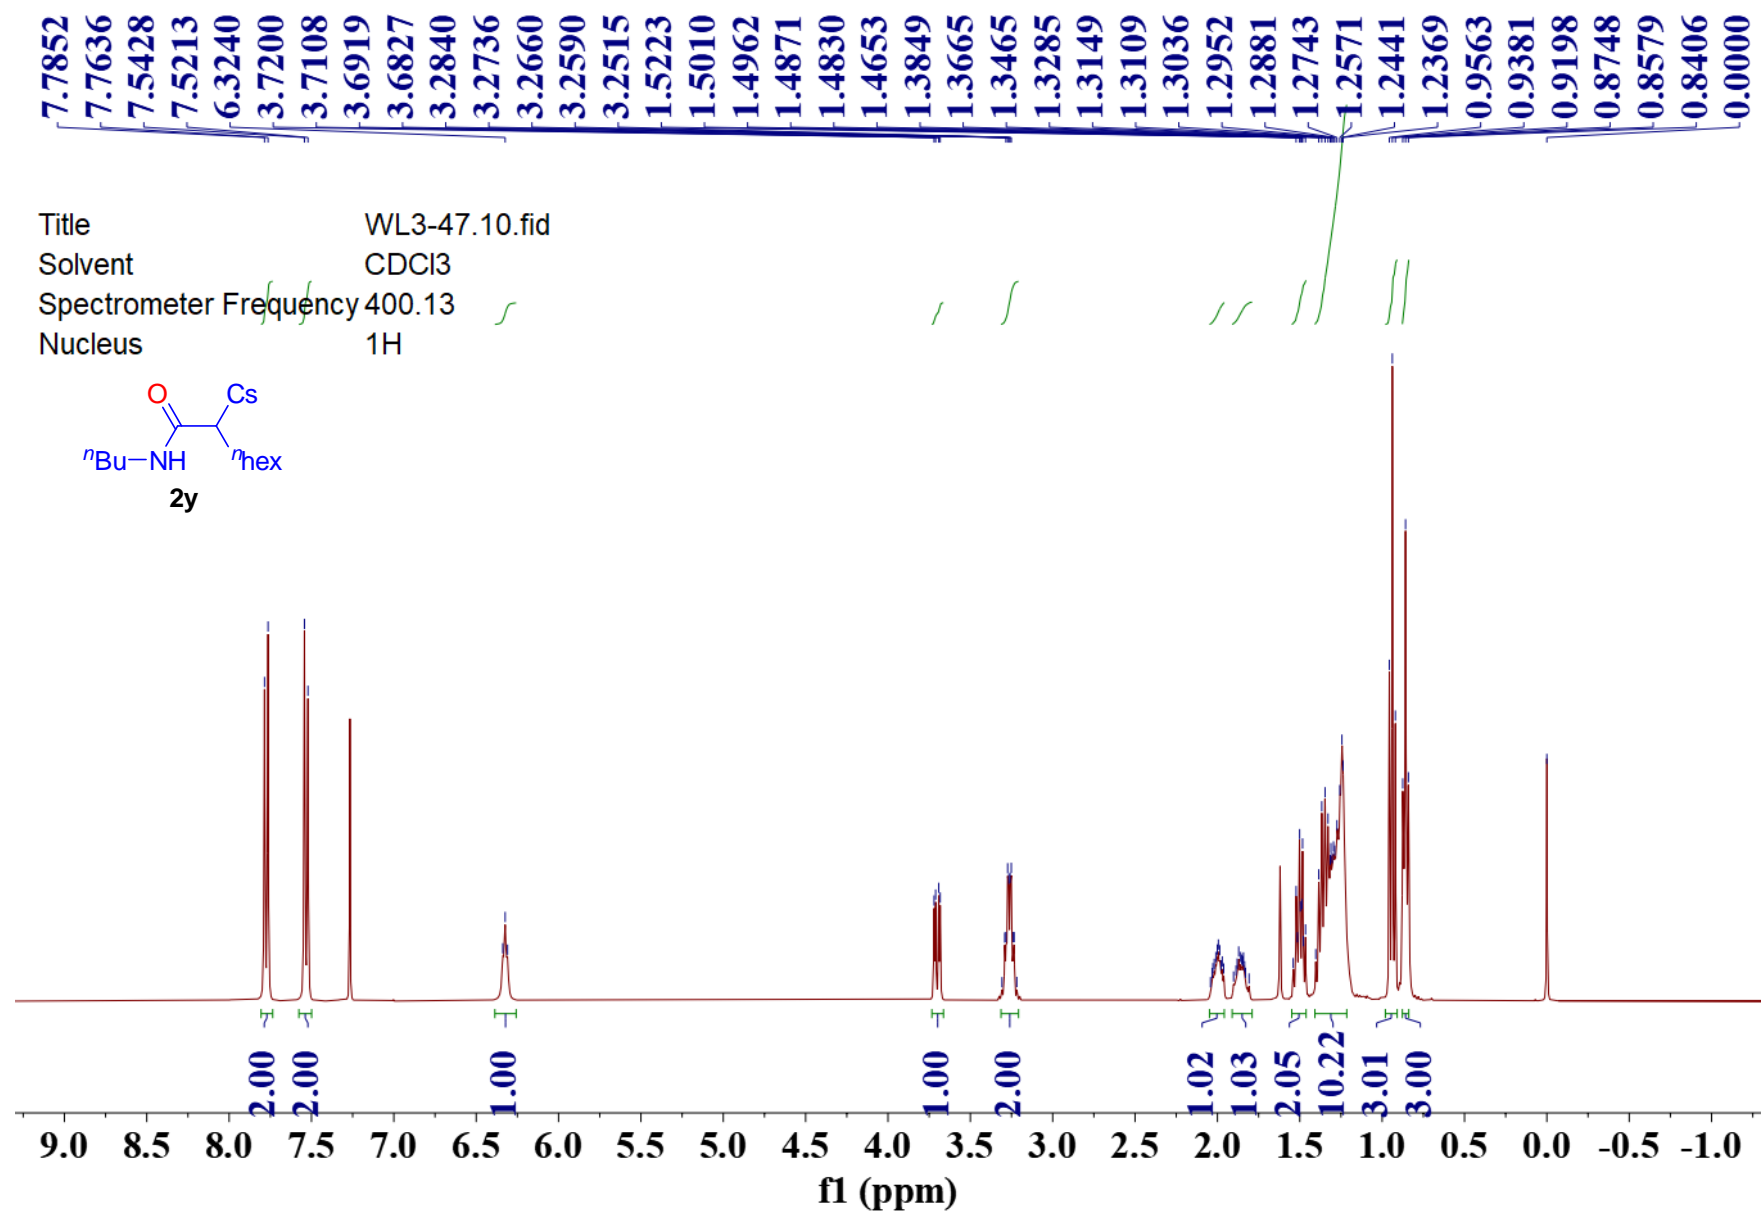

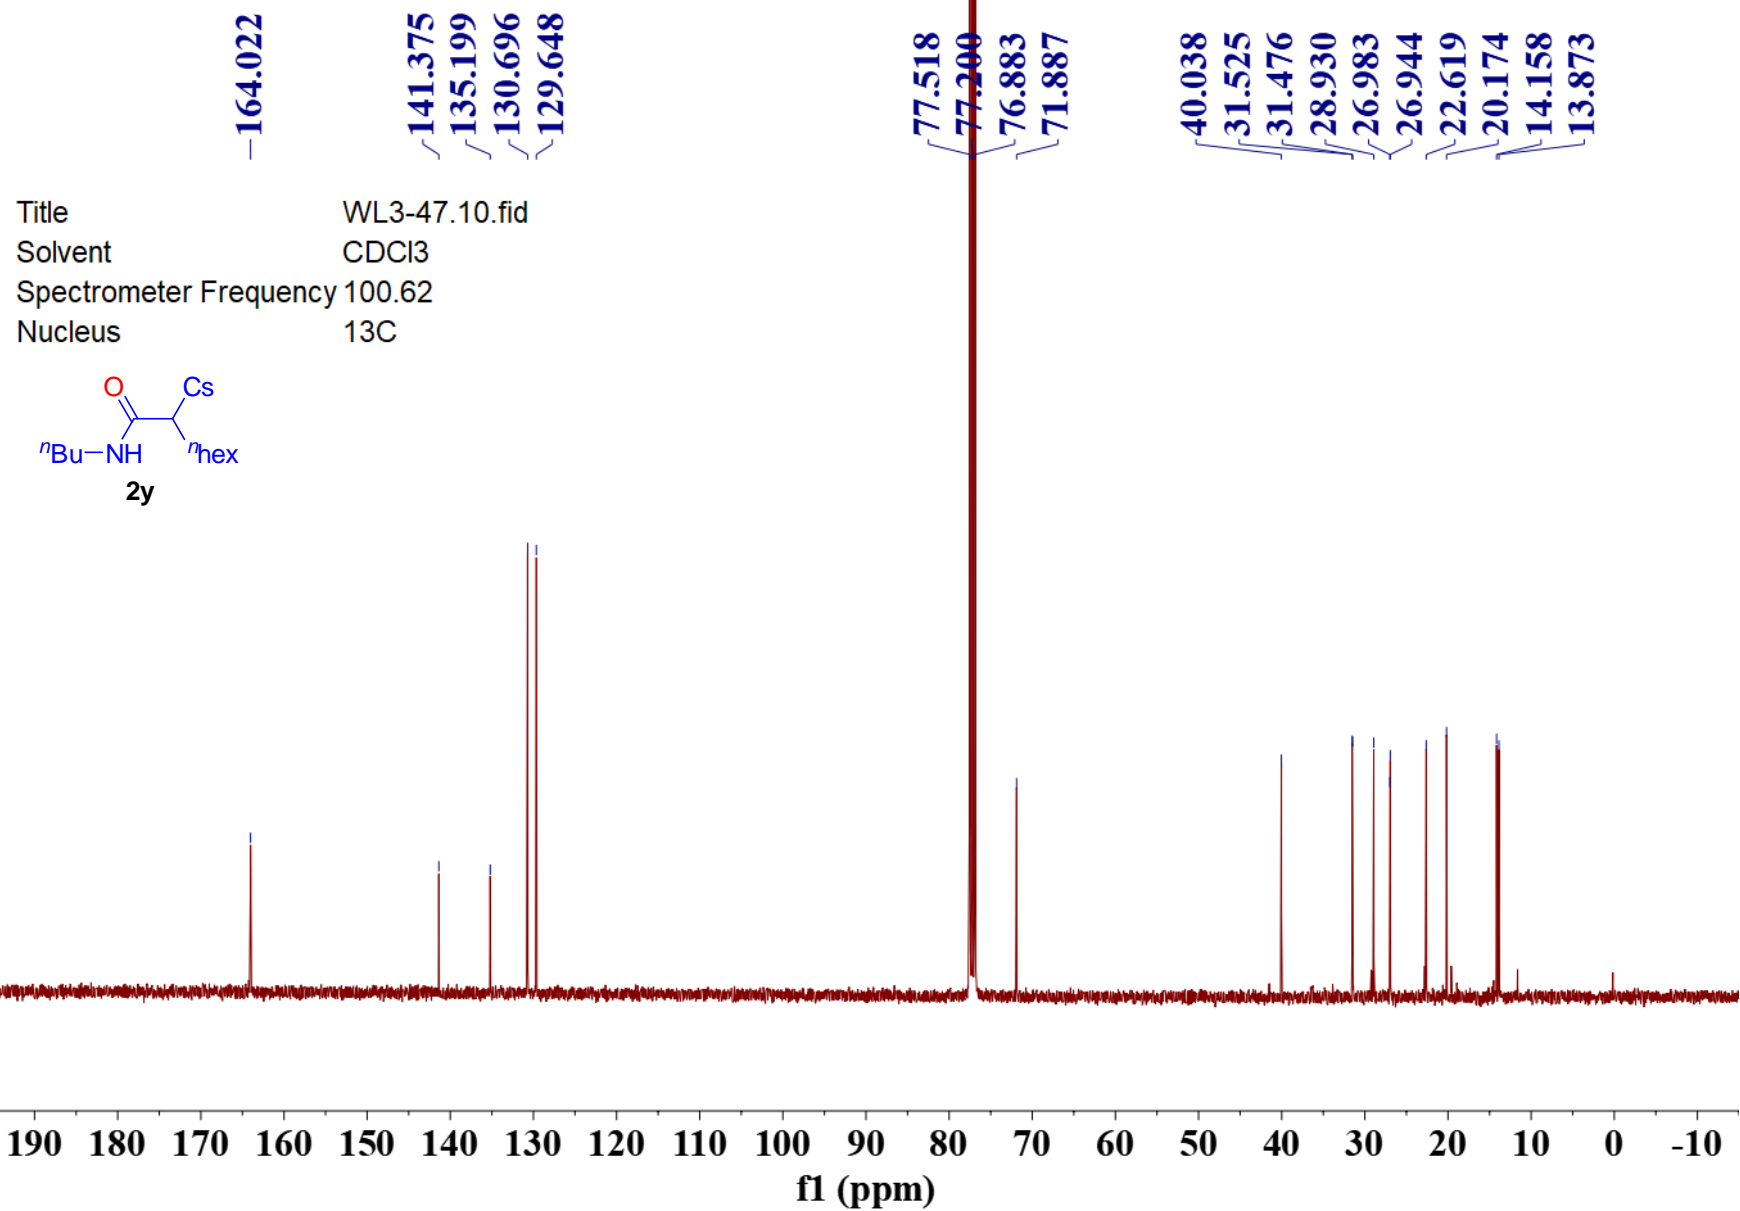



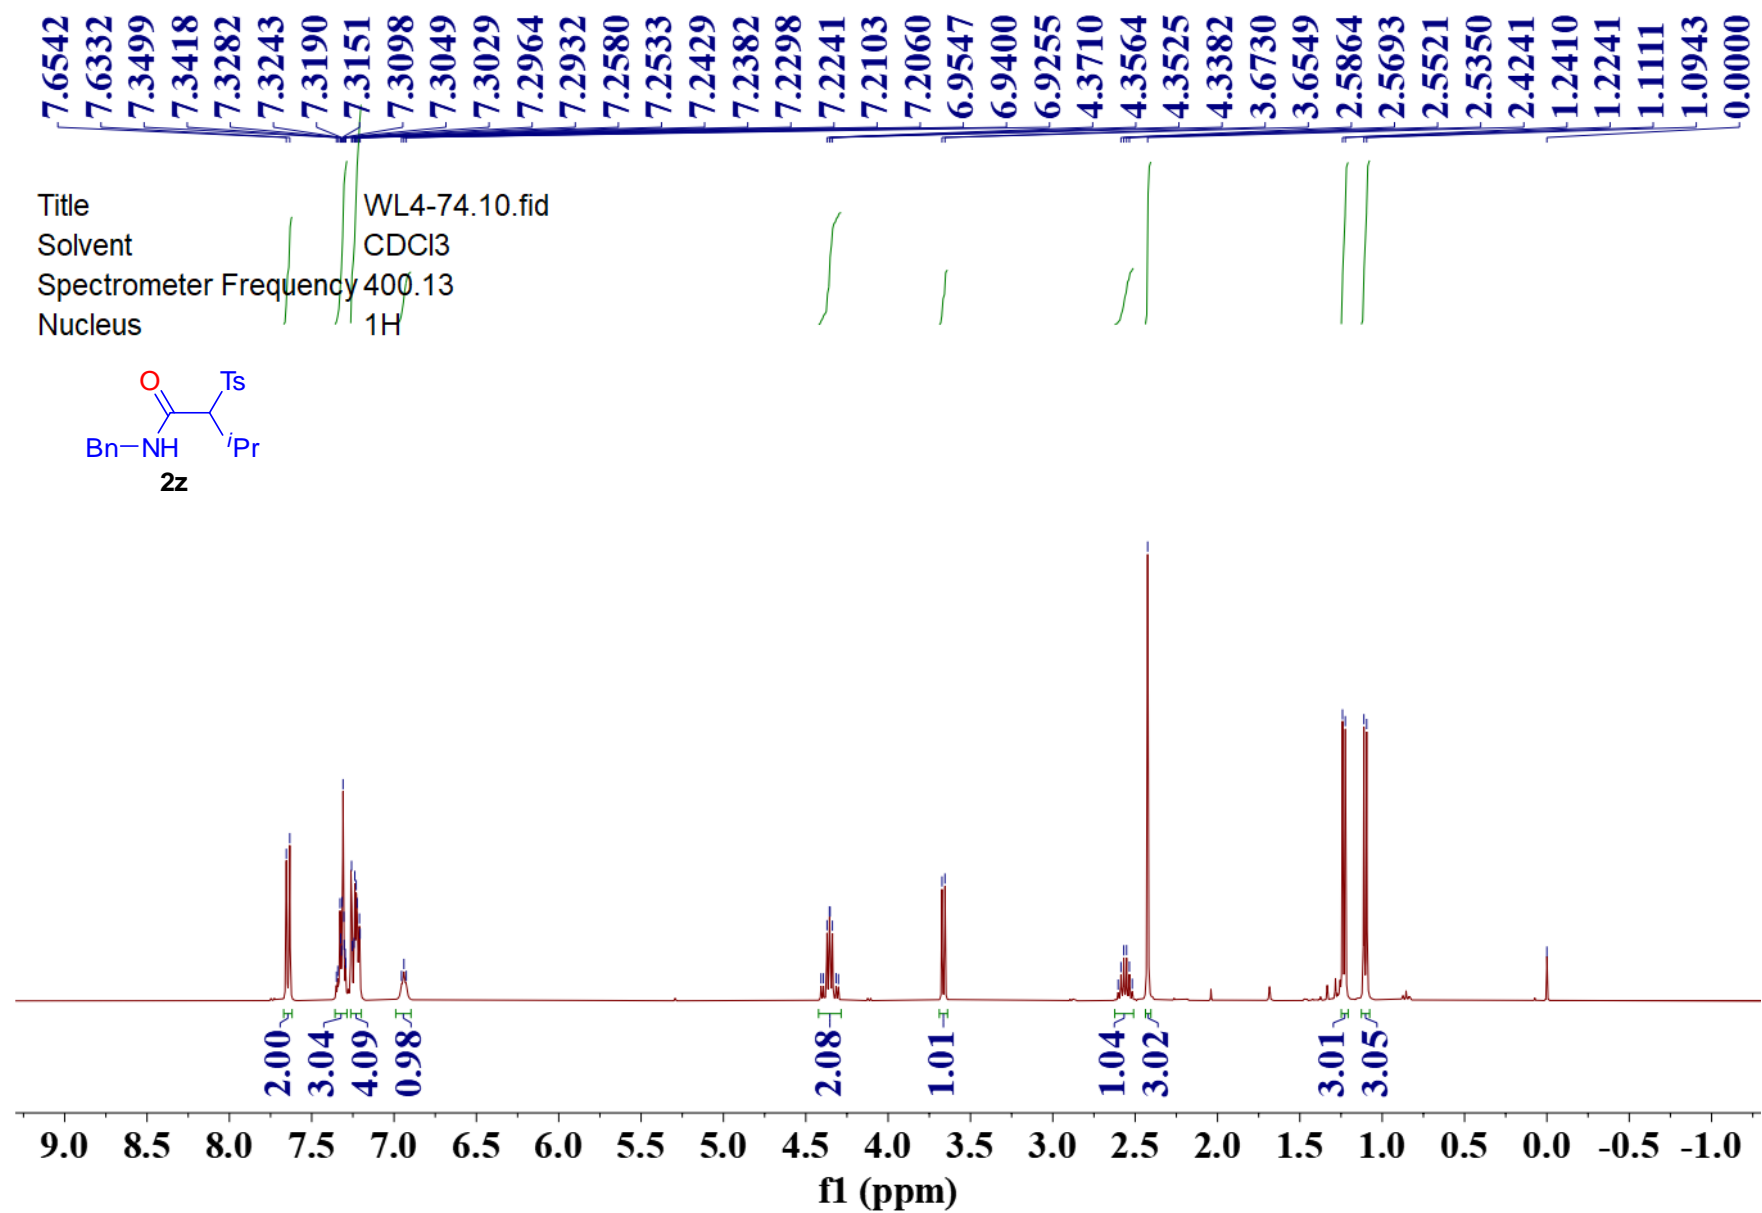

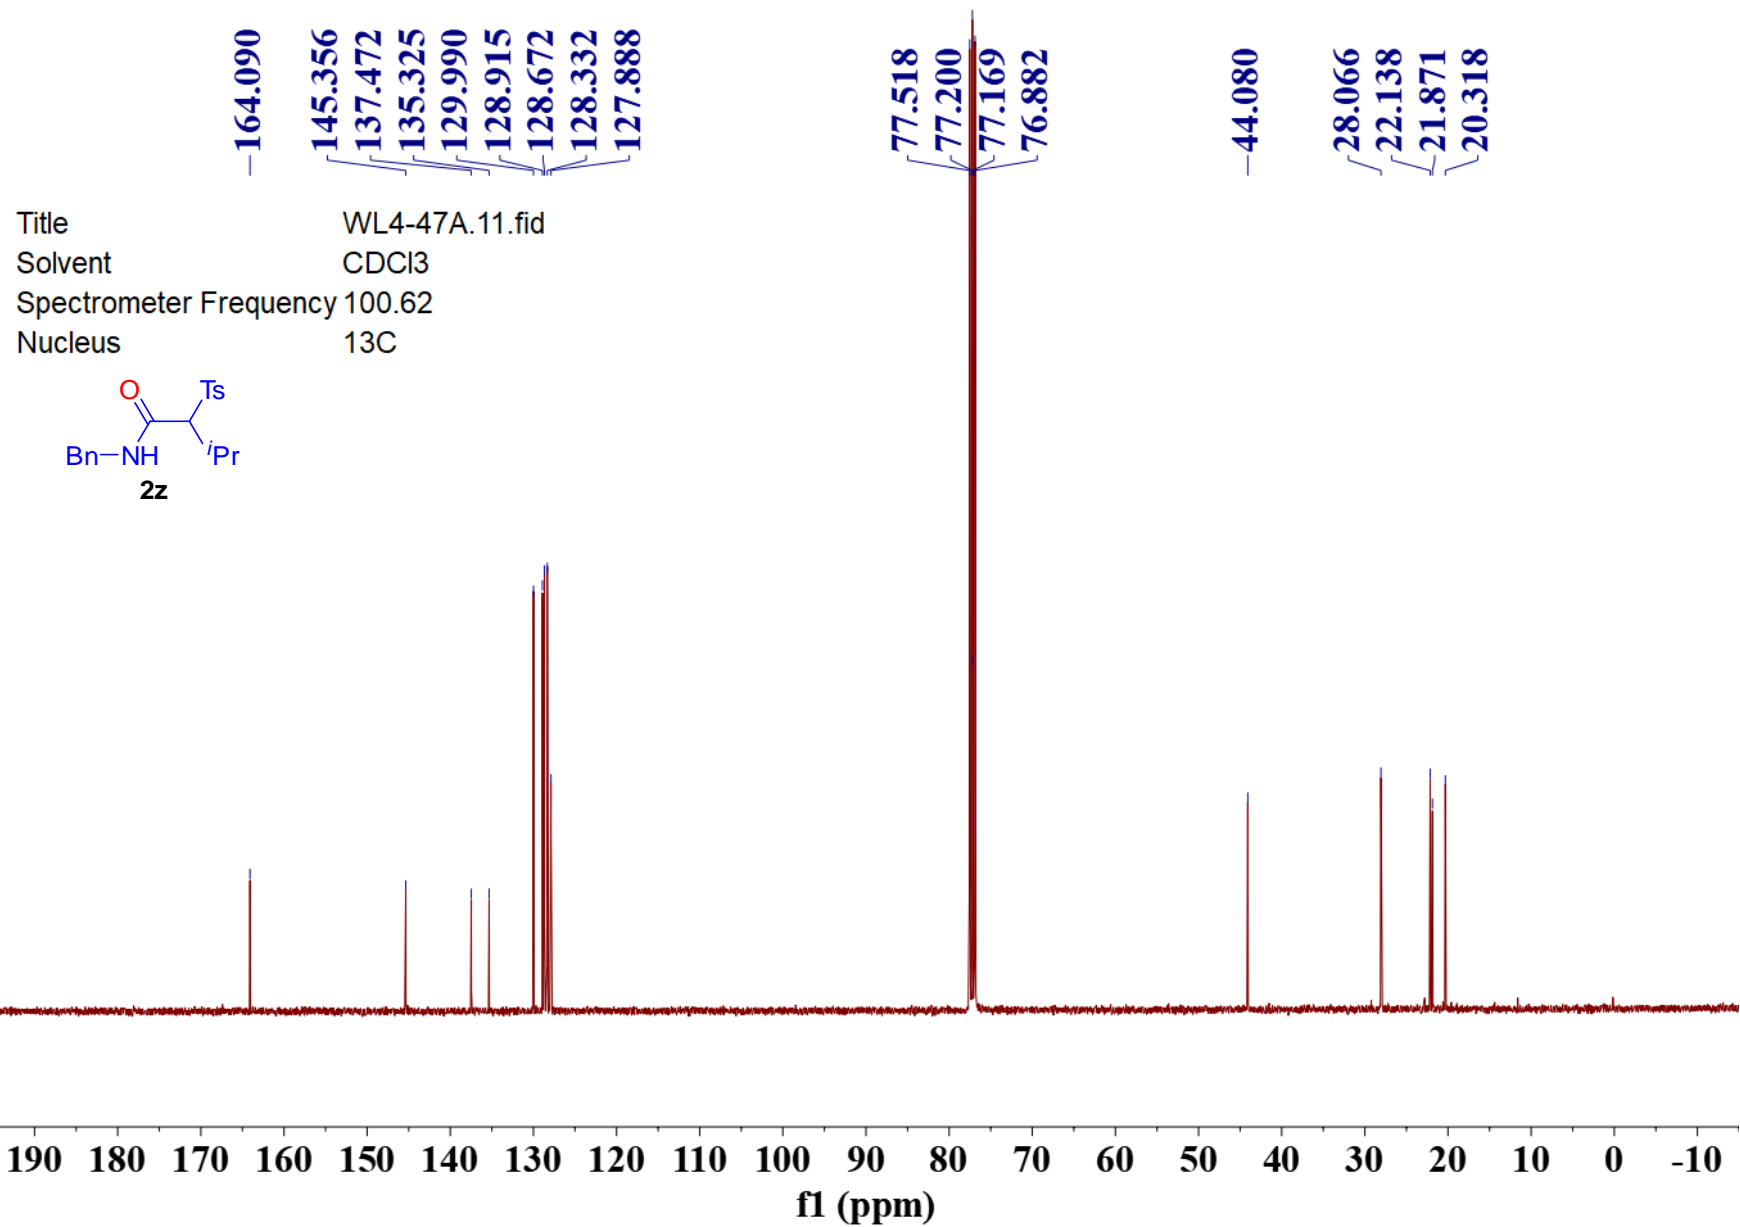

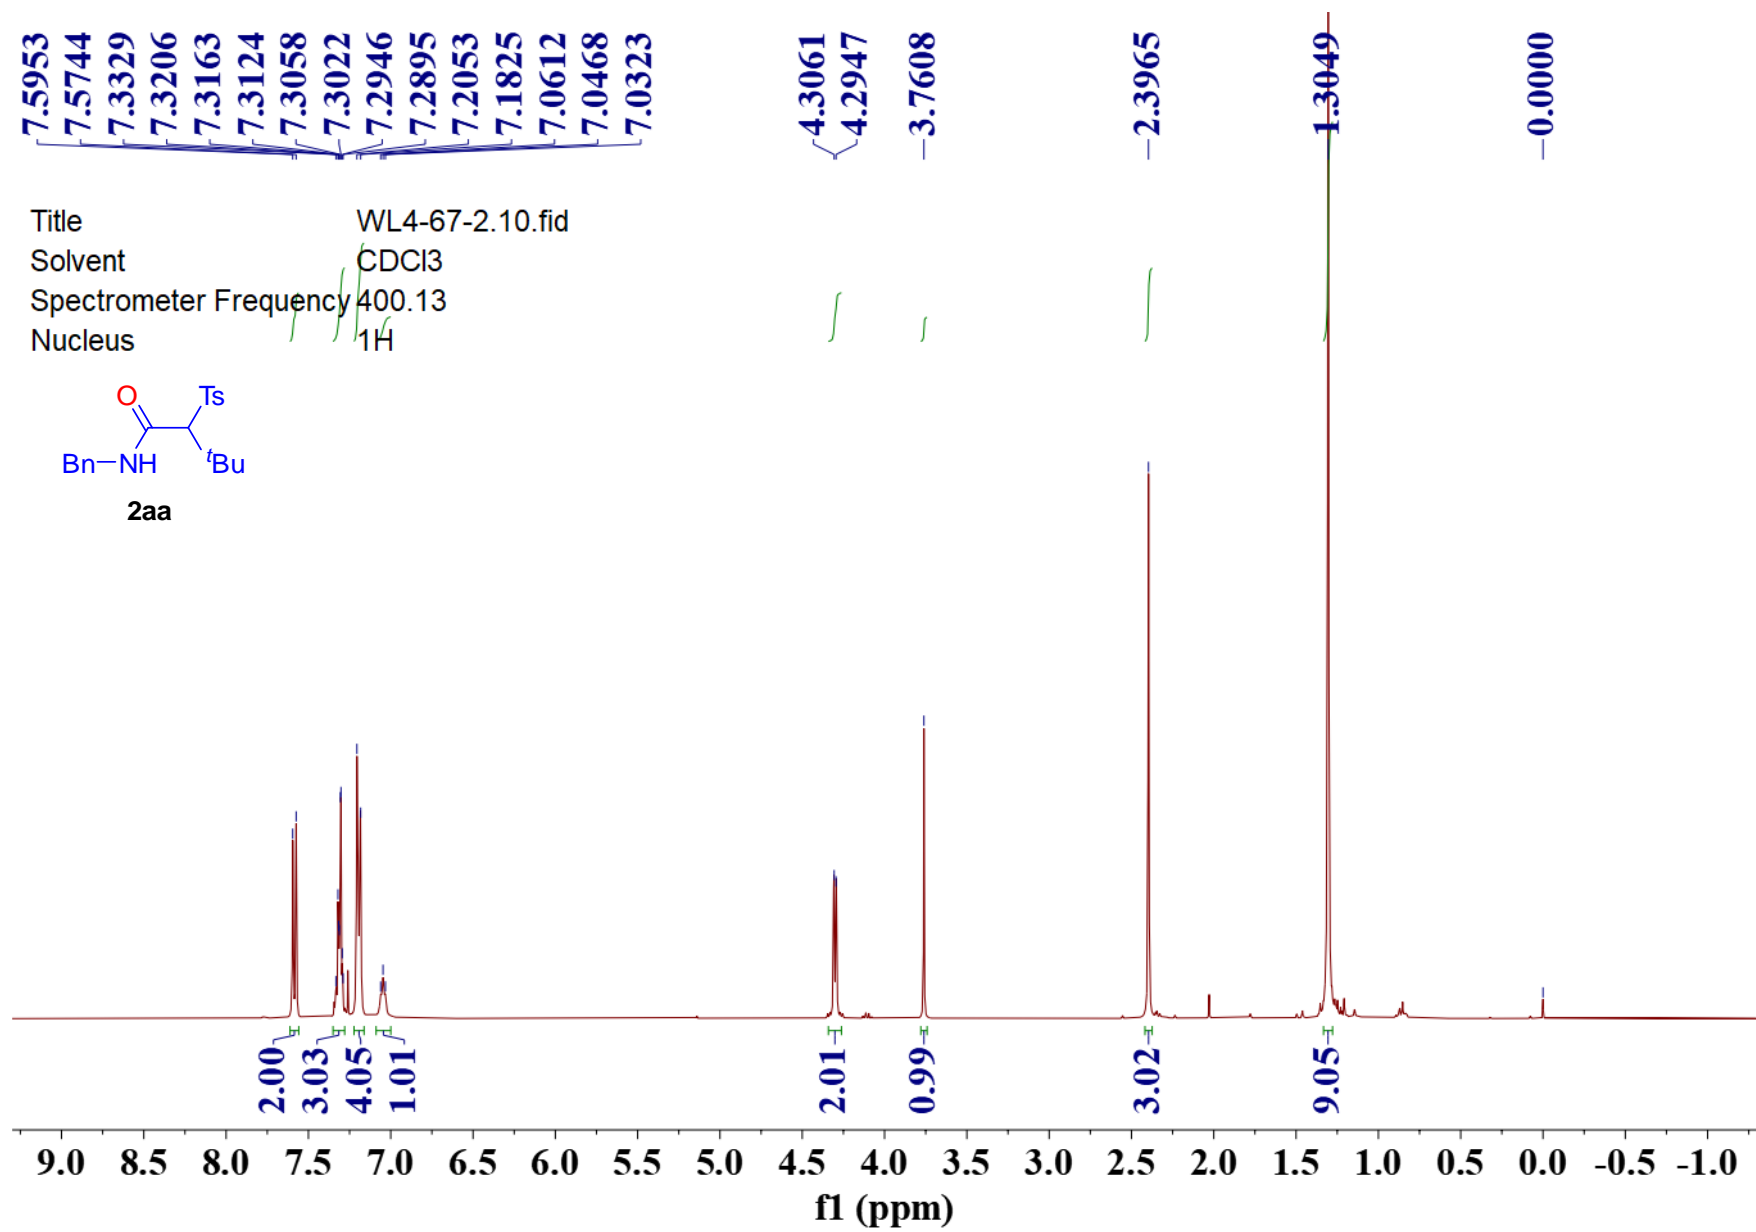

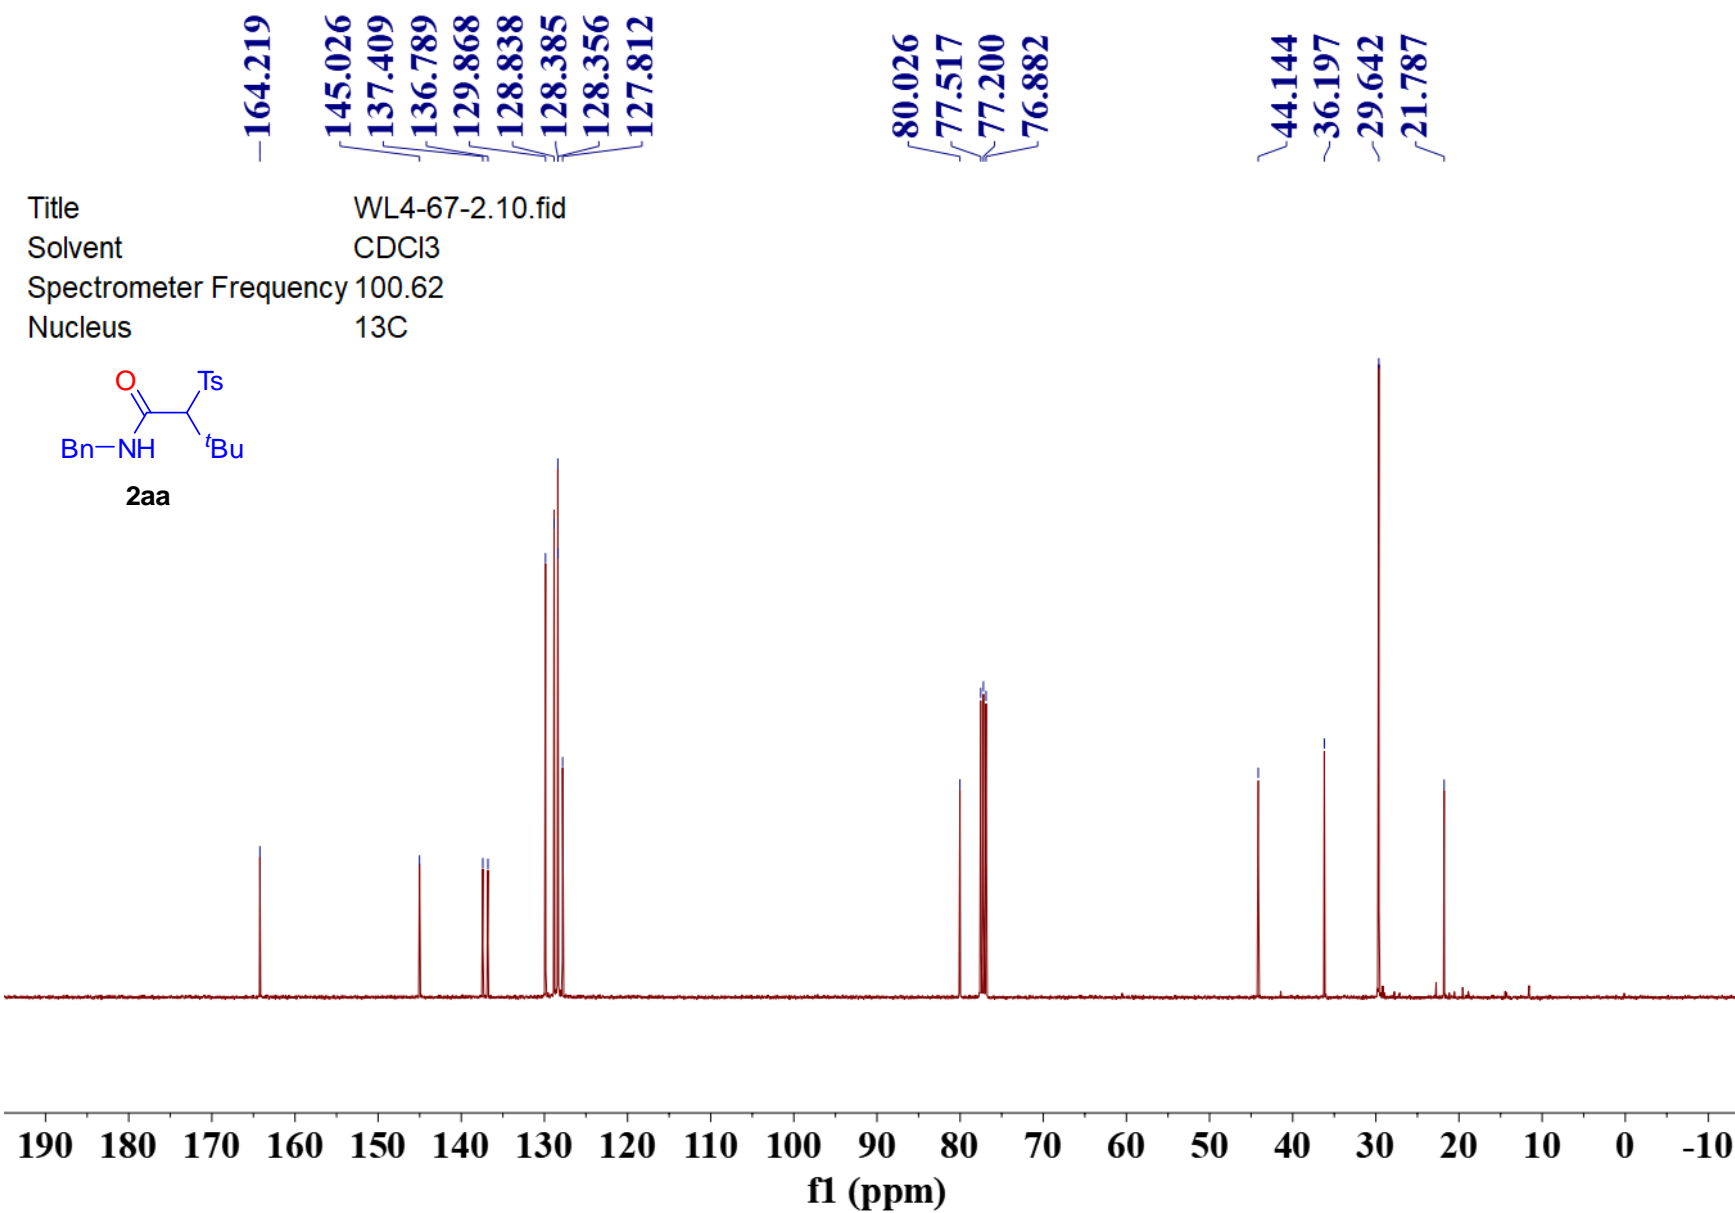

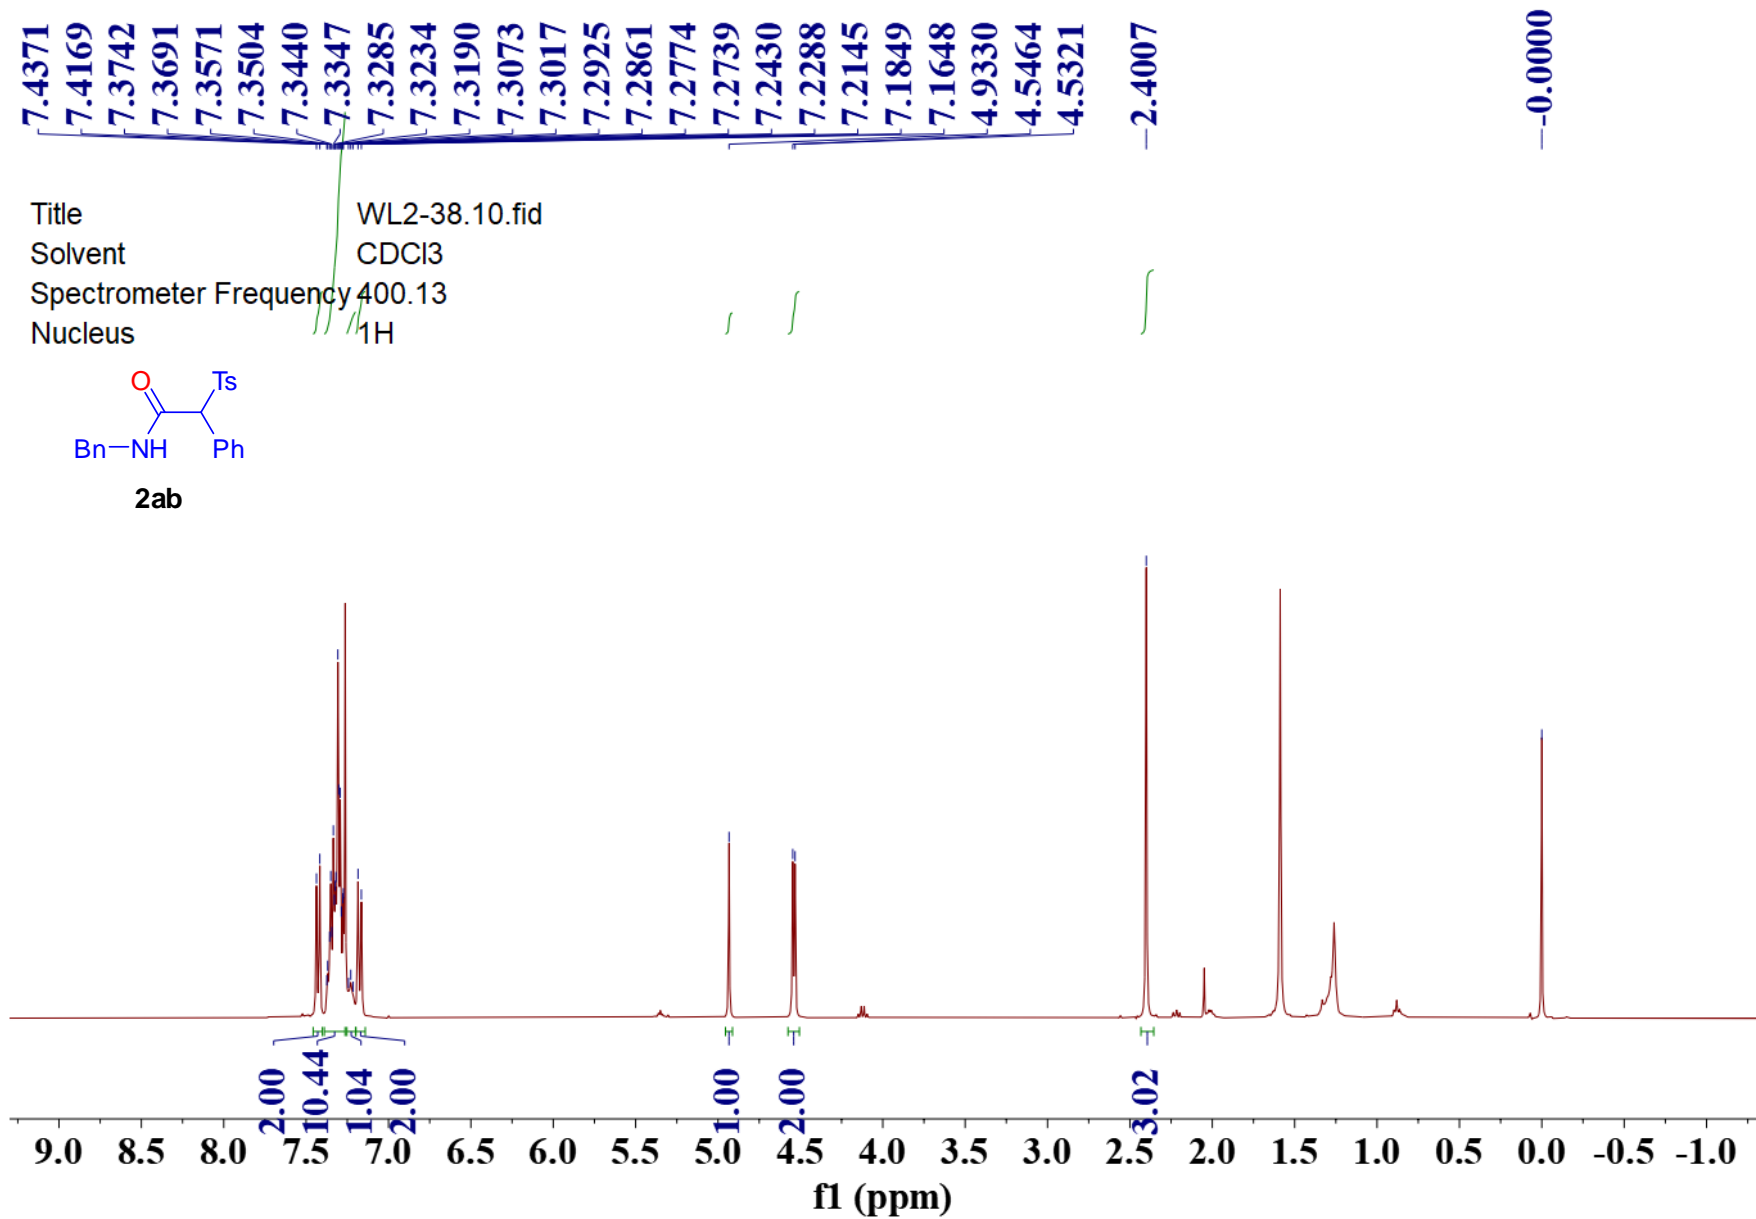

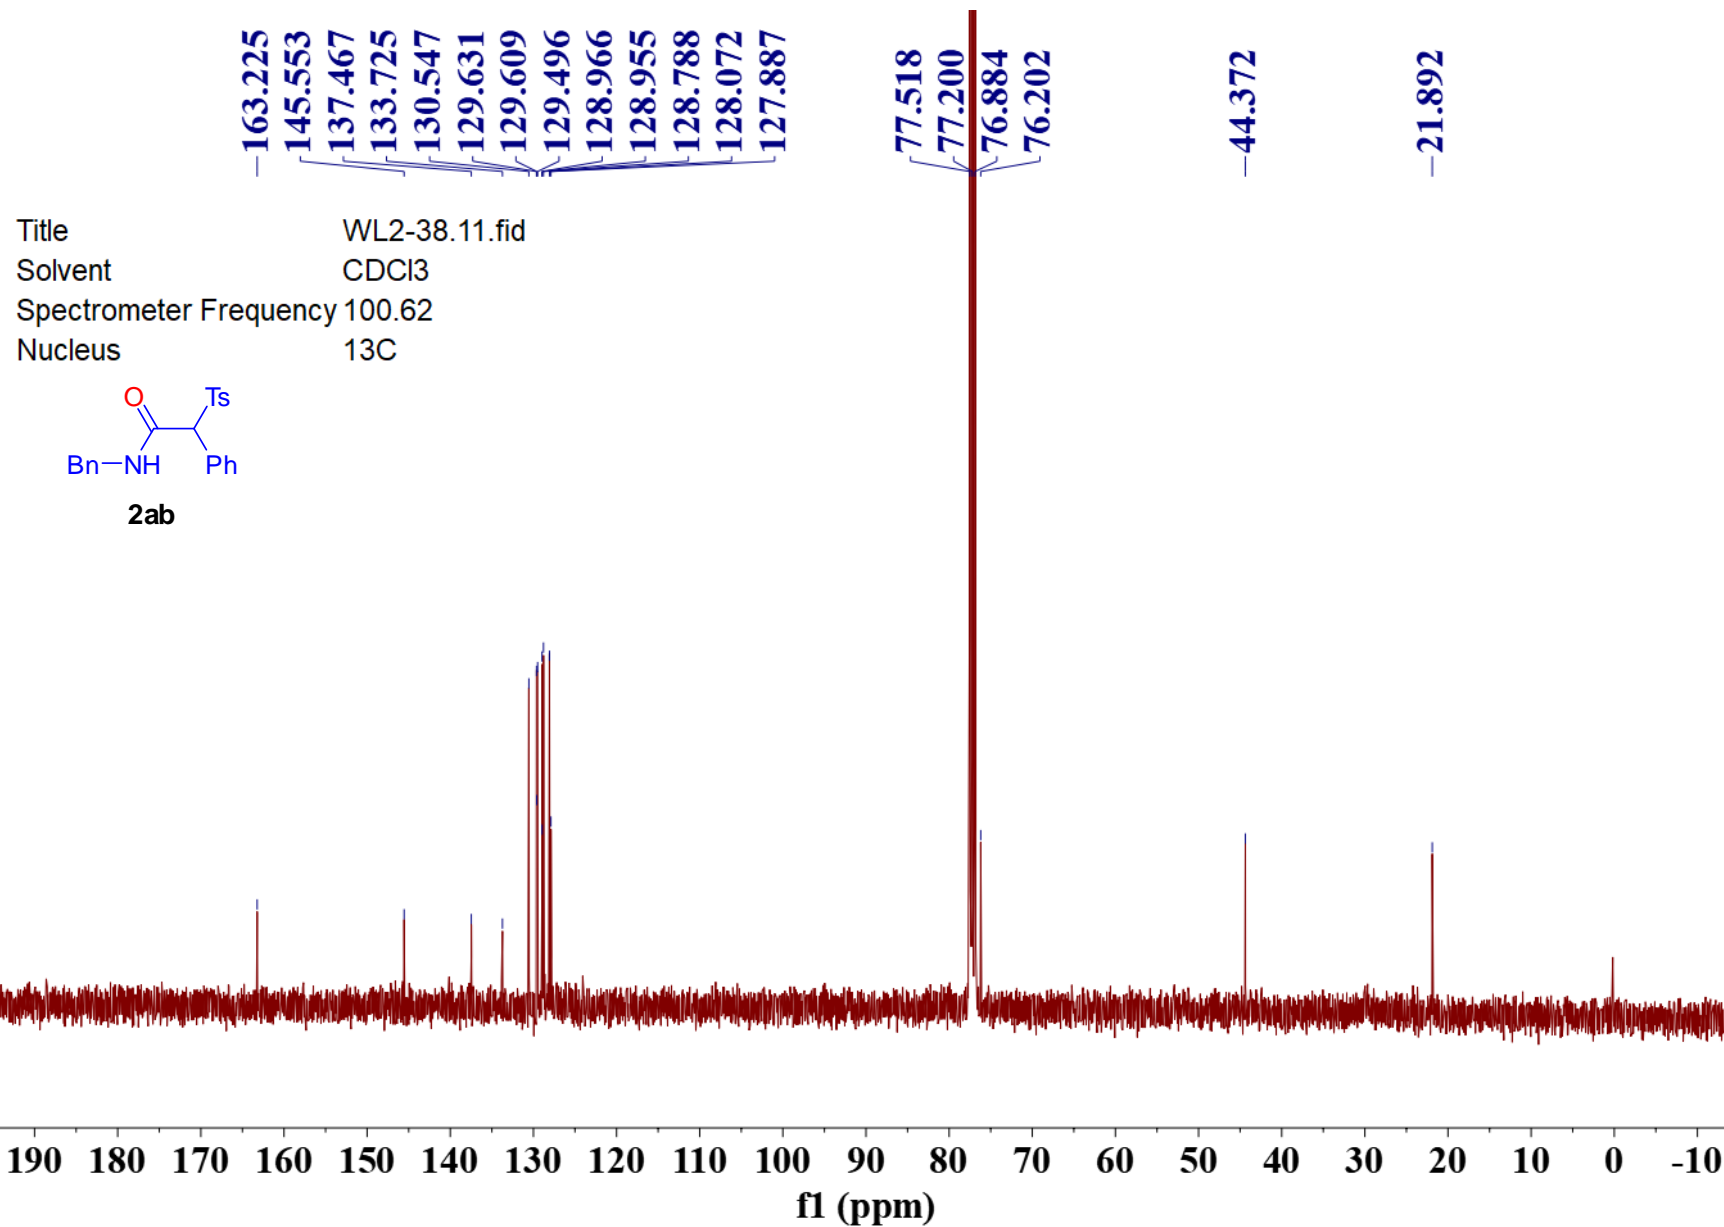

S145

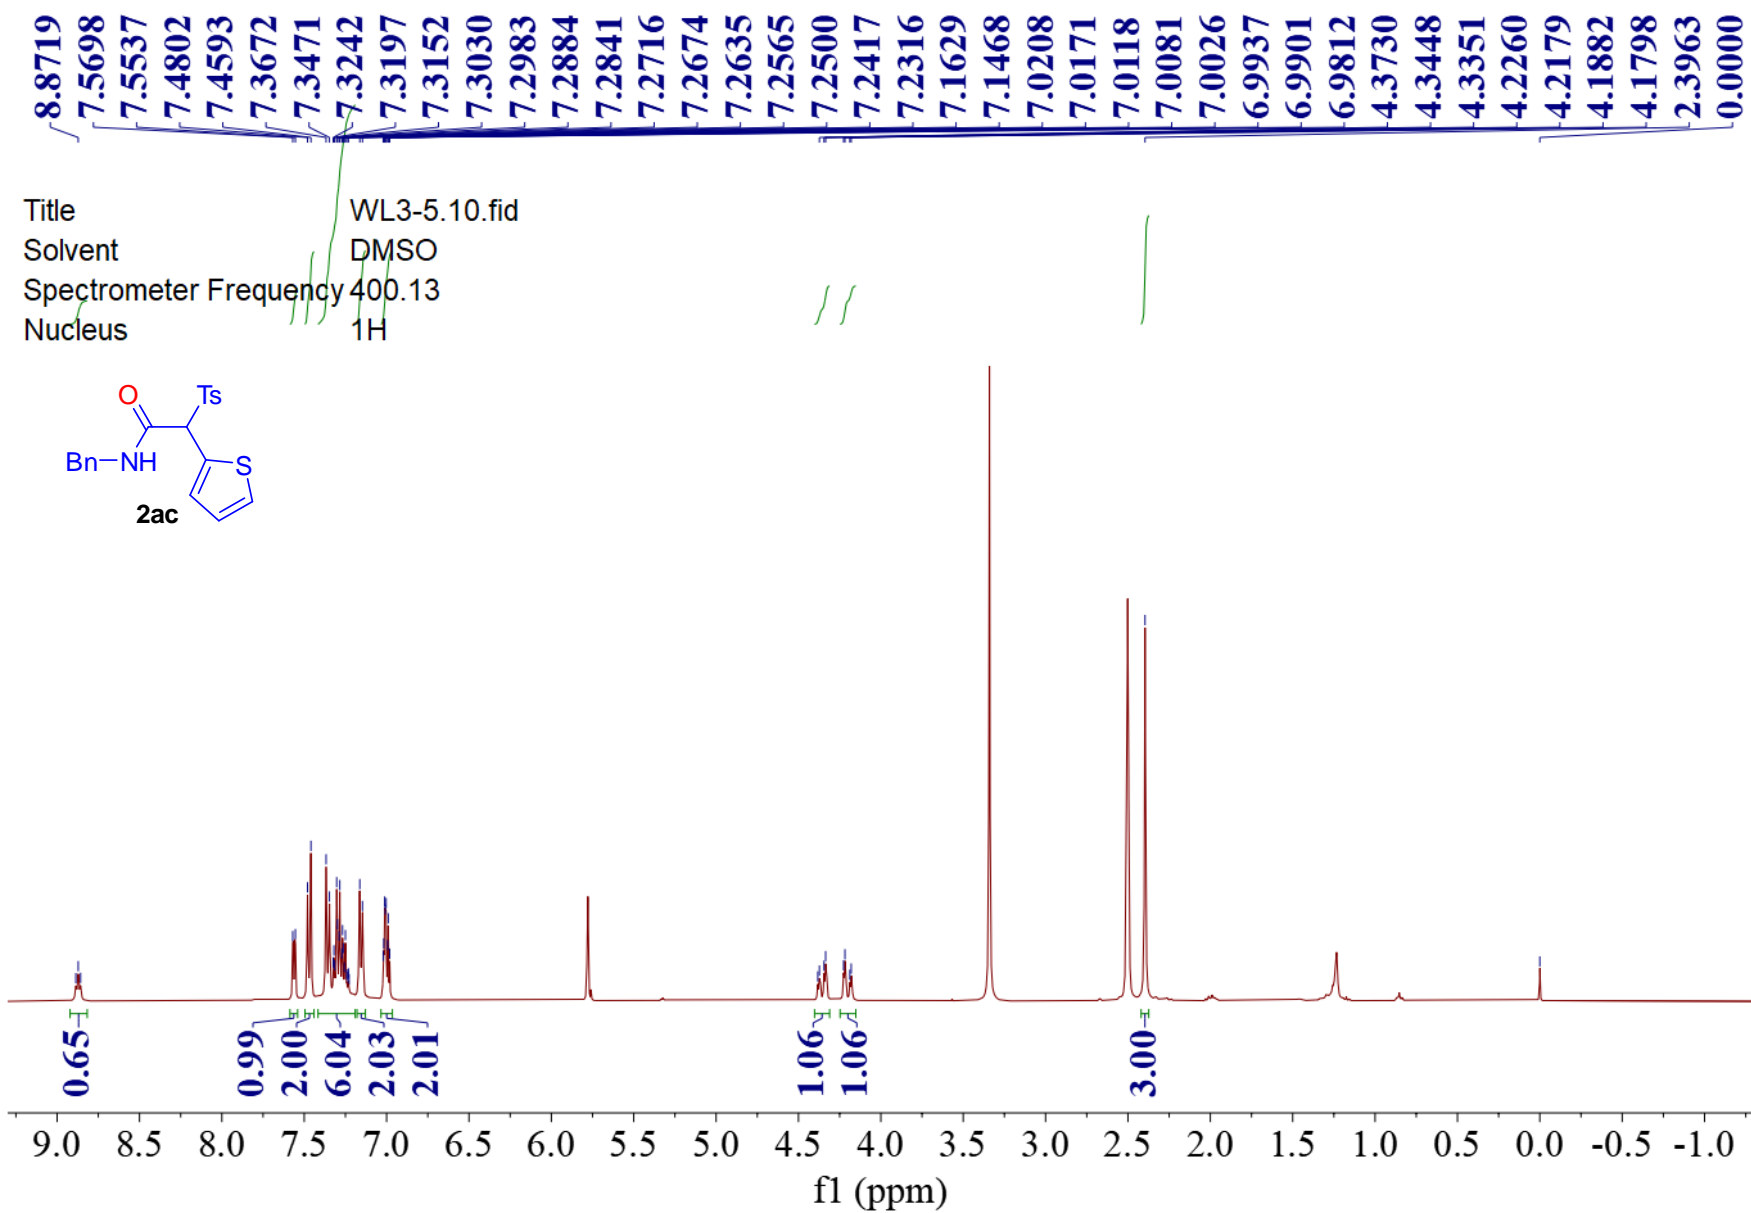

S146

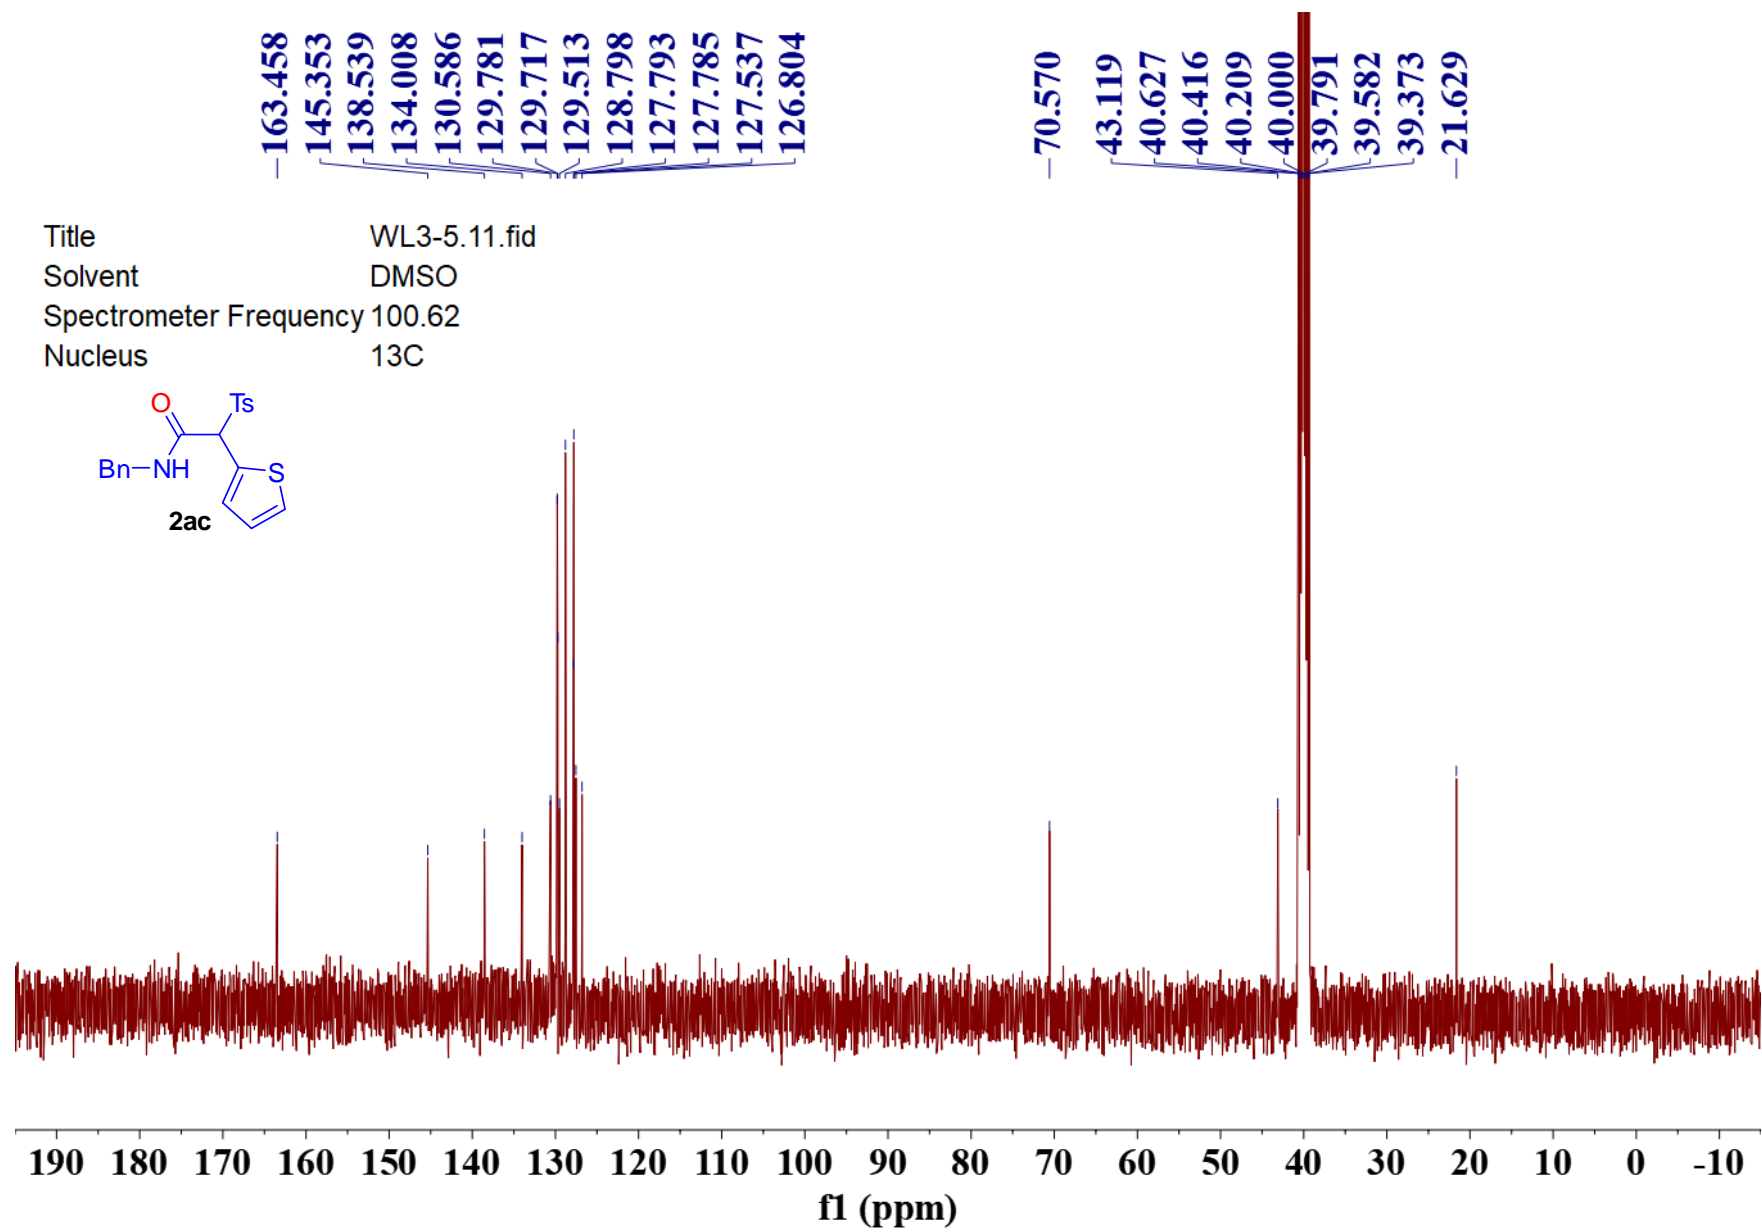



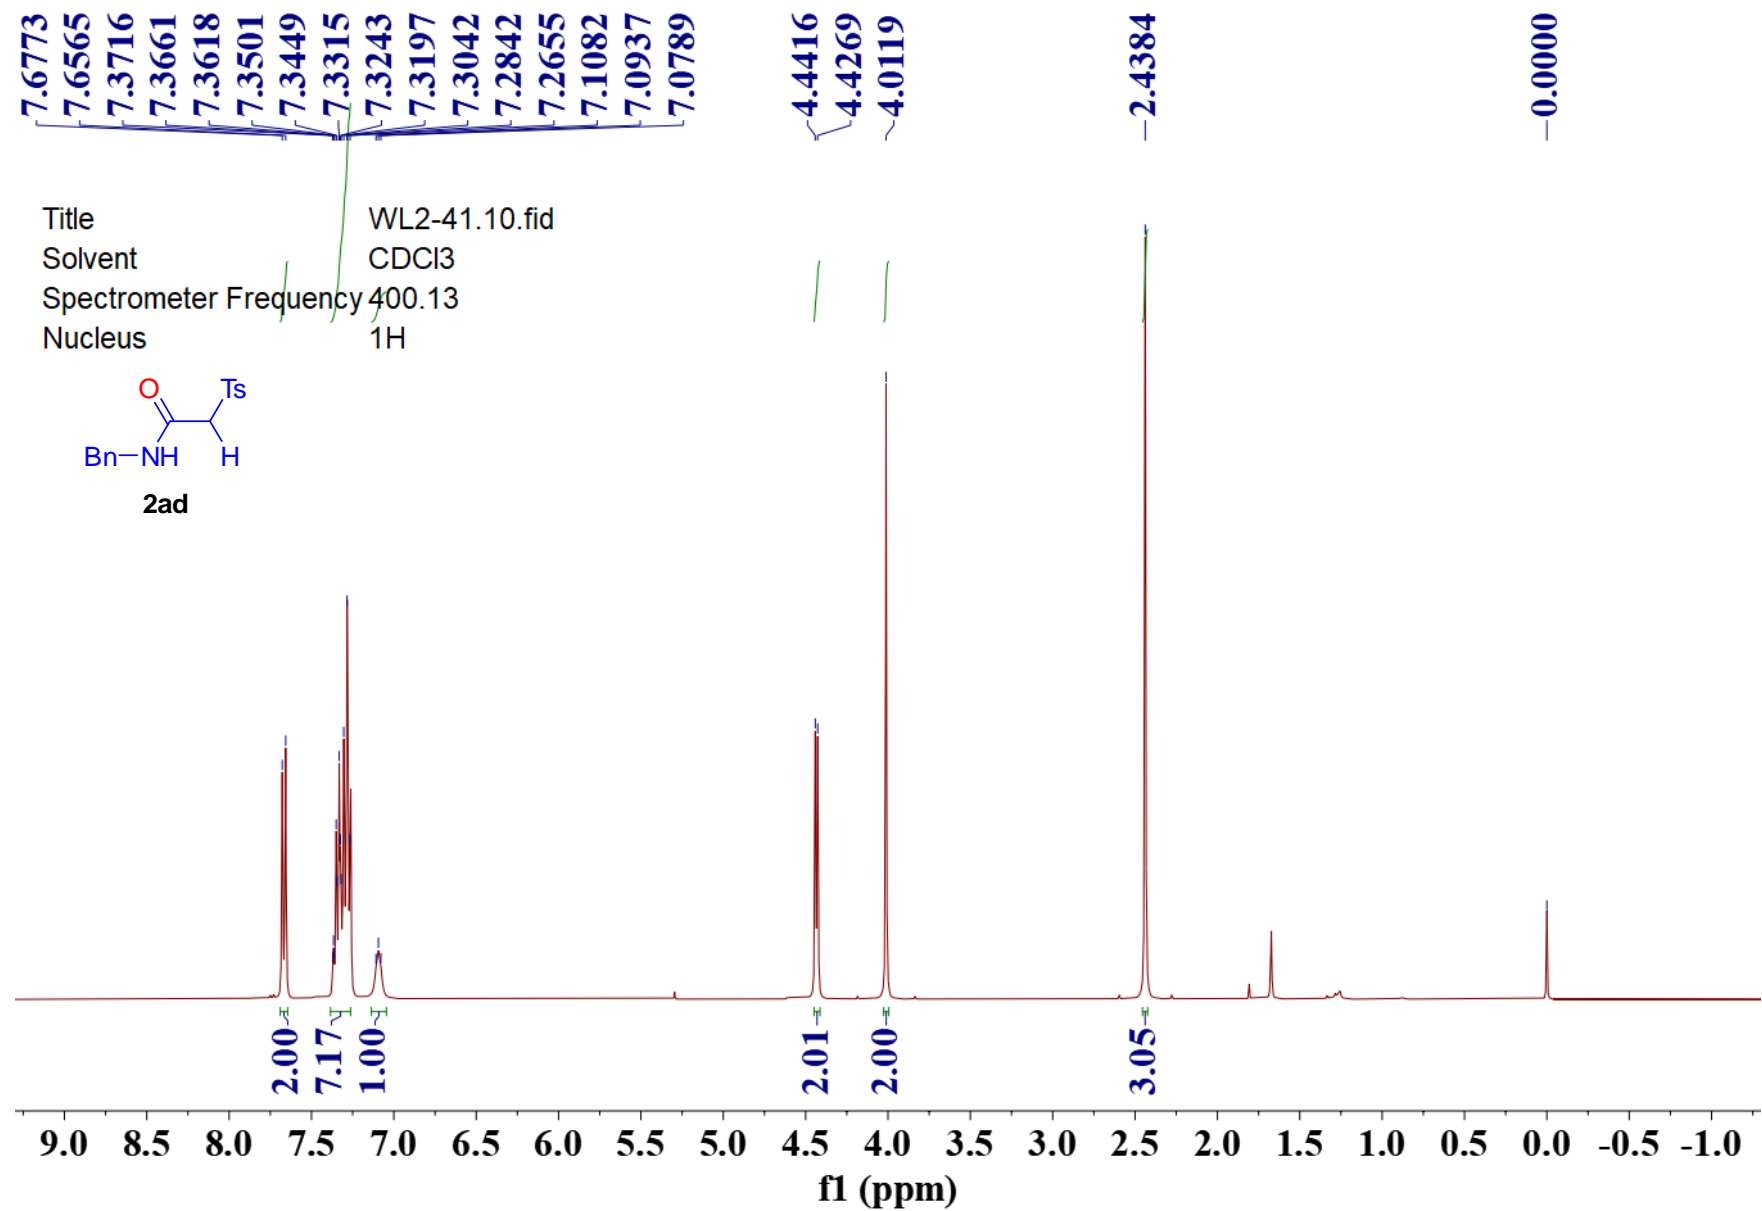

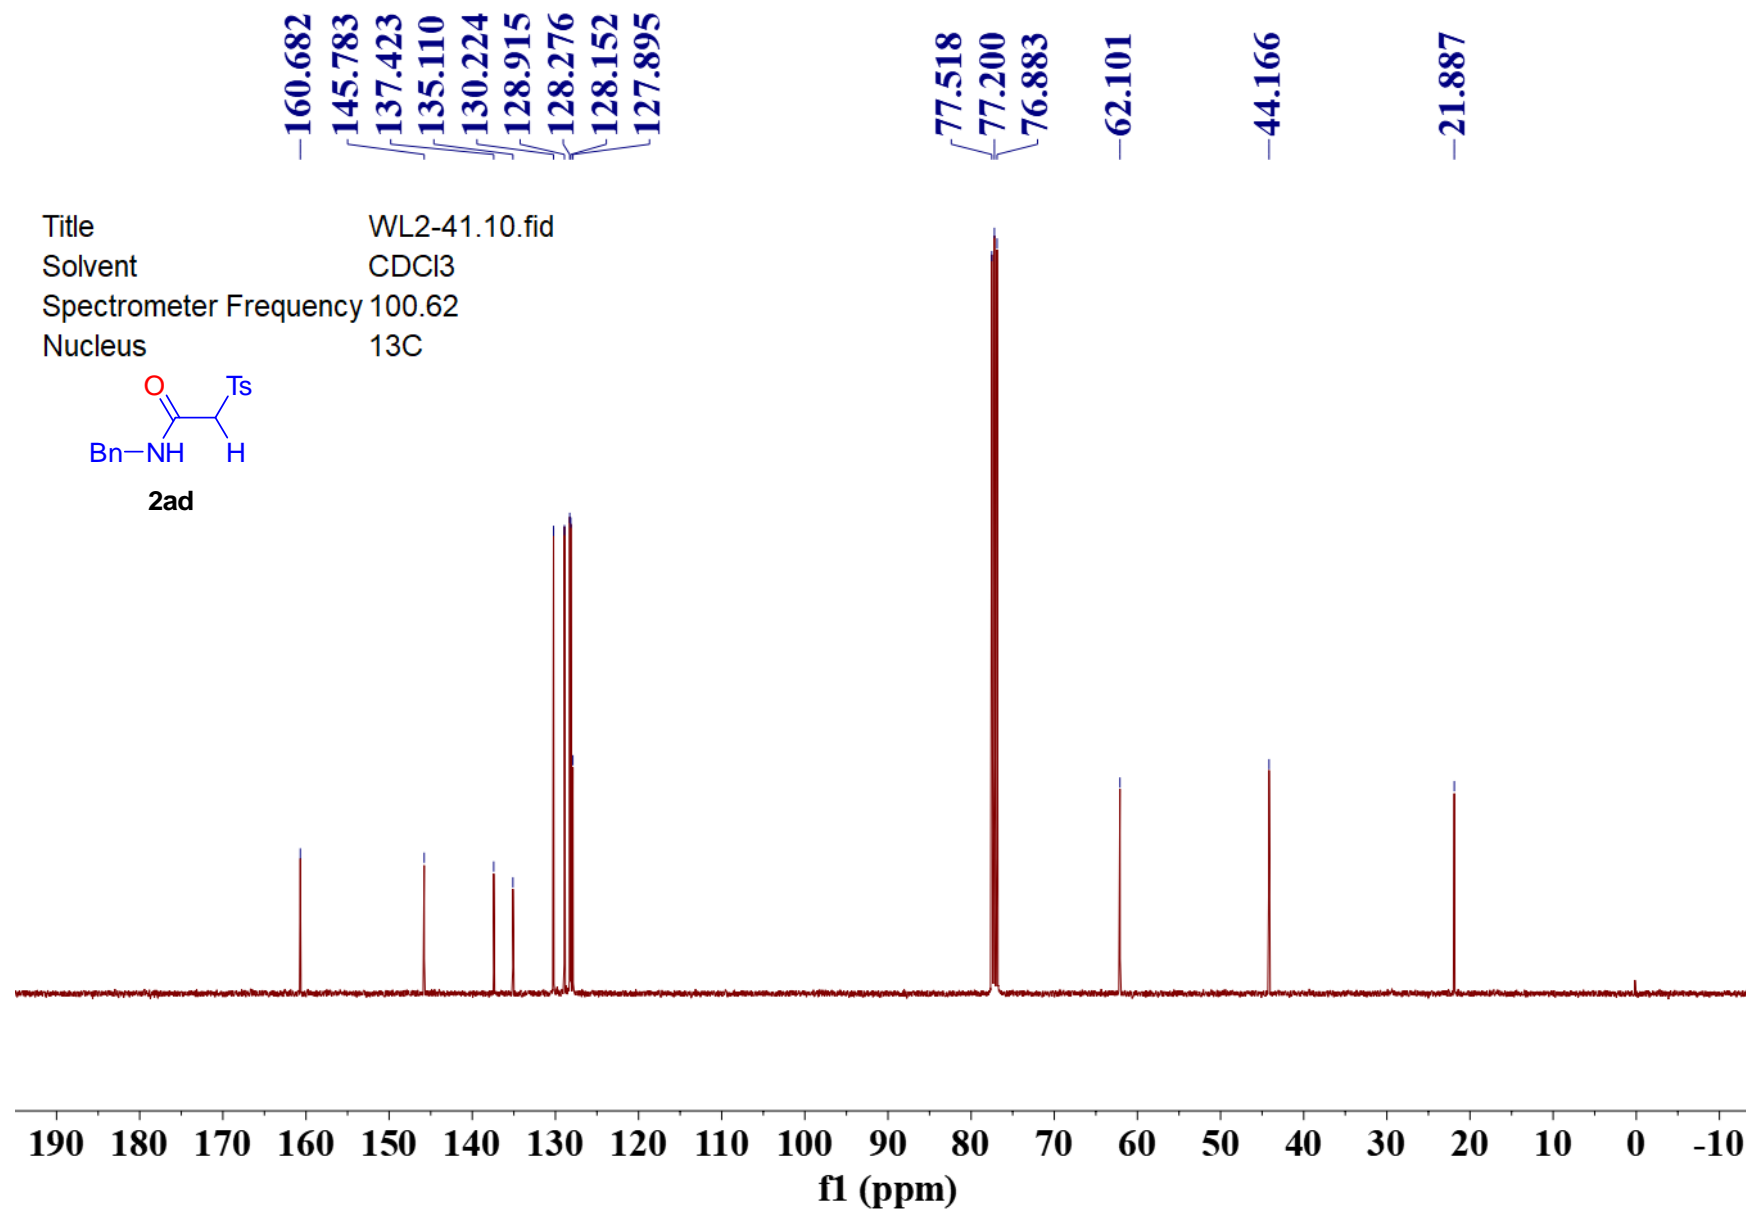

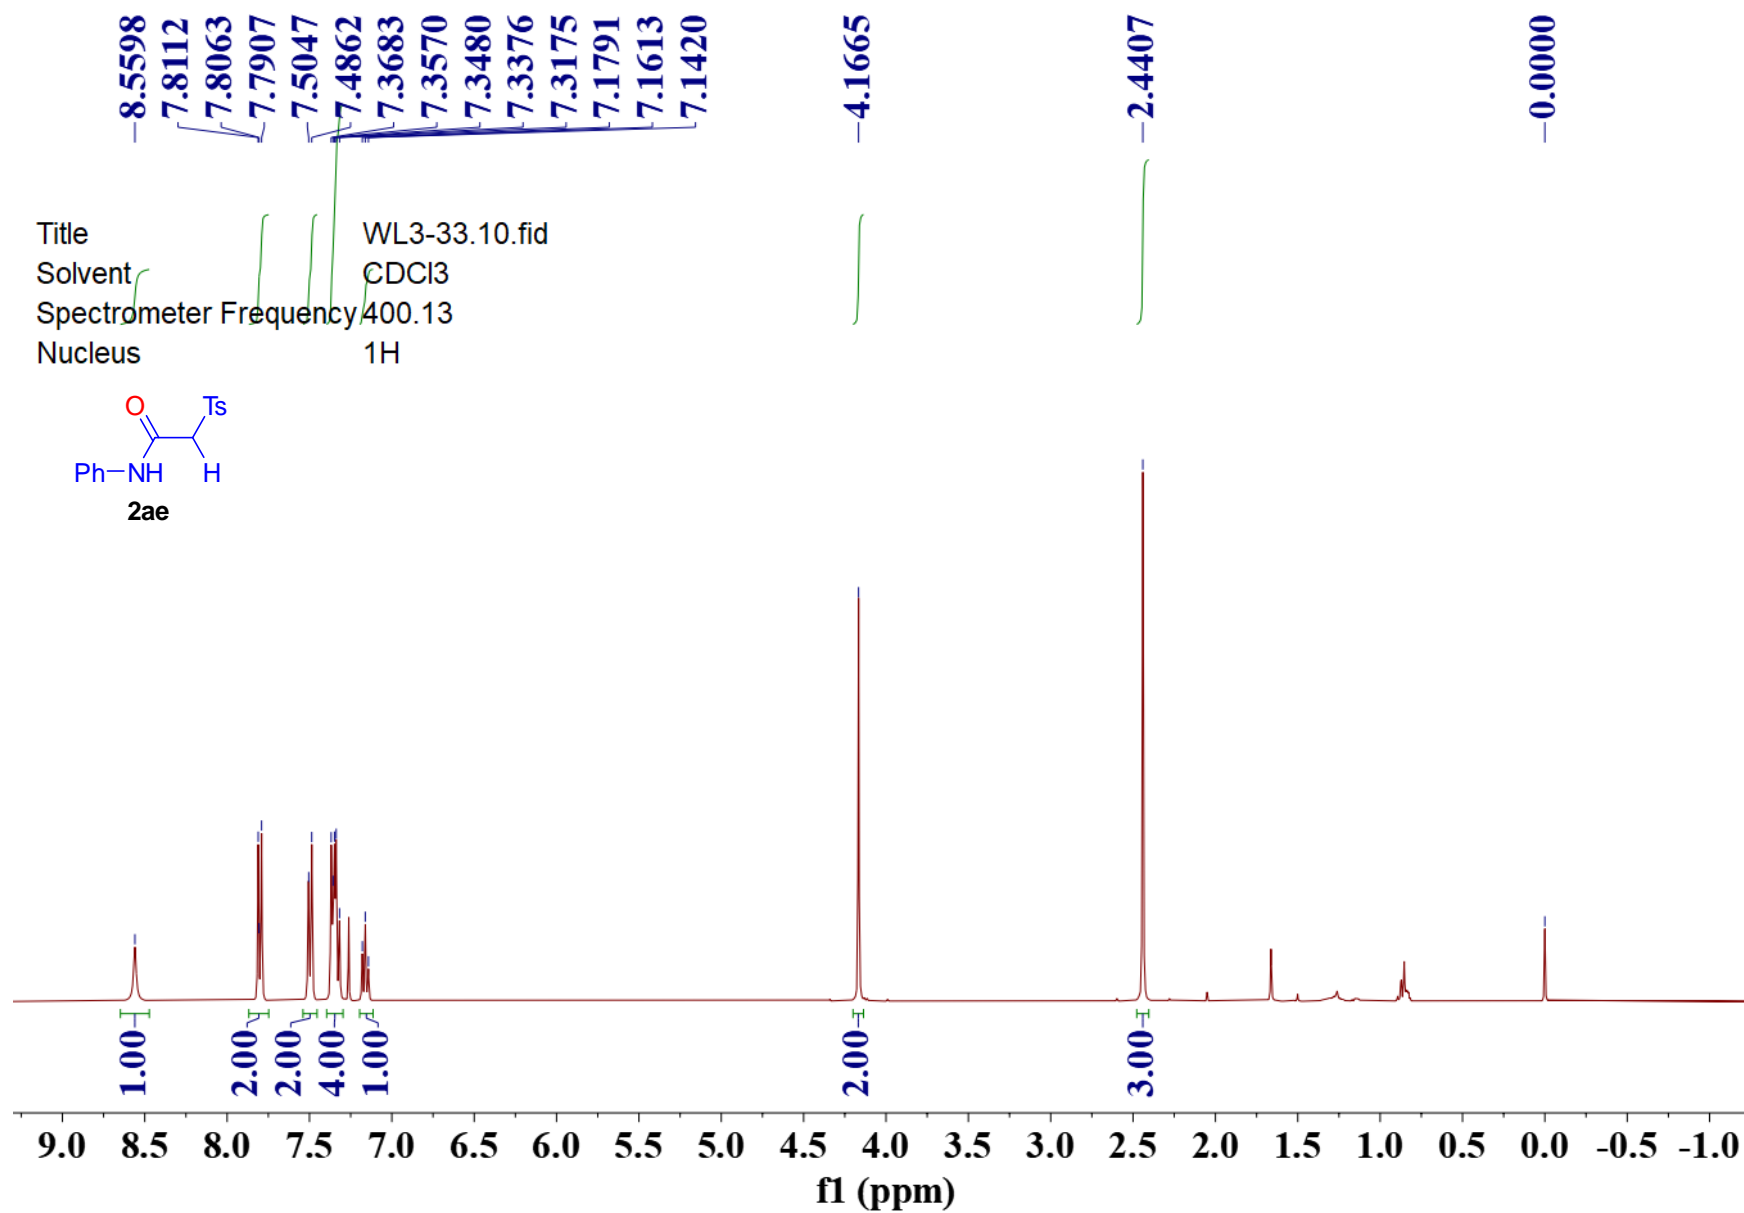

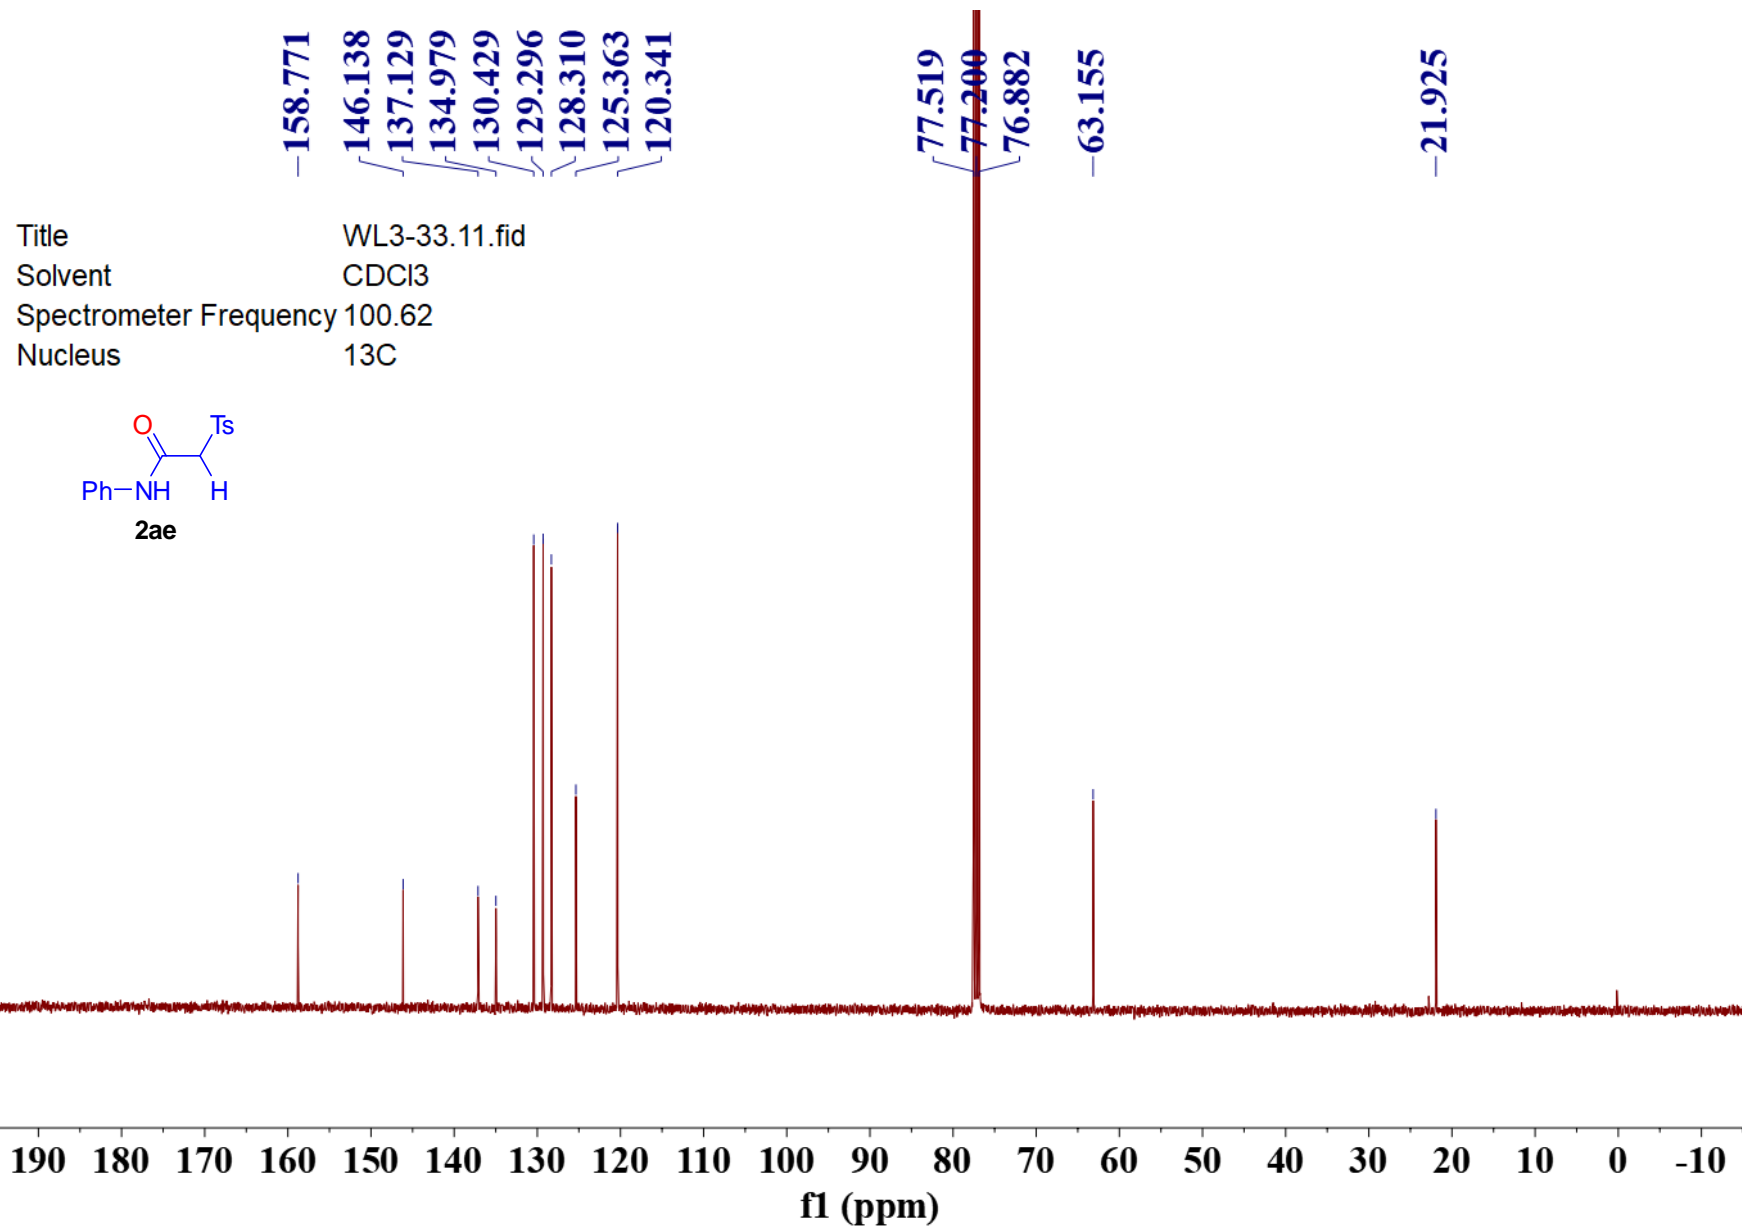

S151

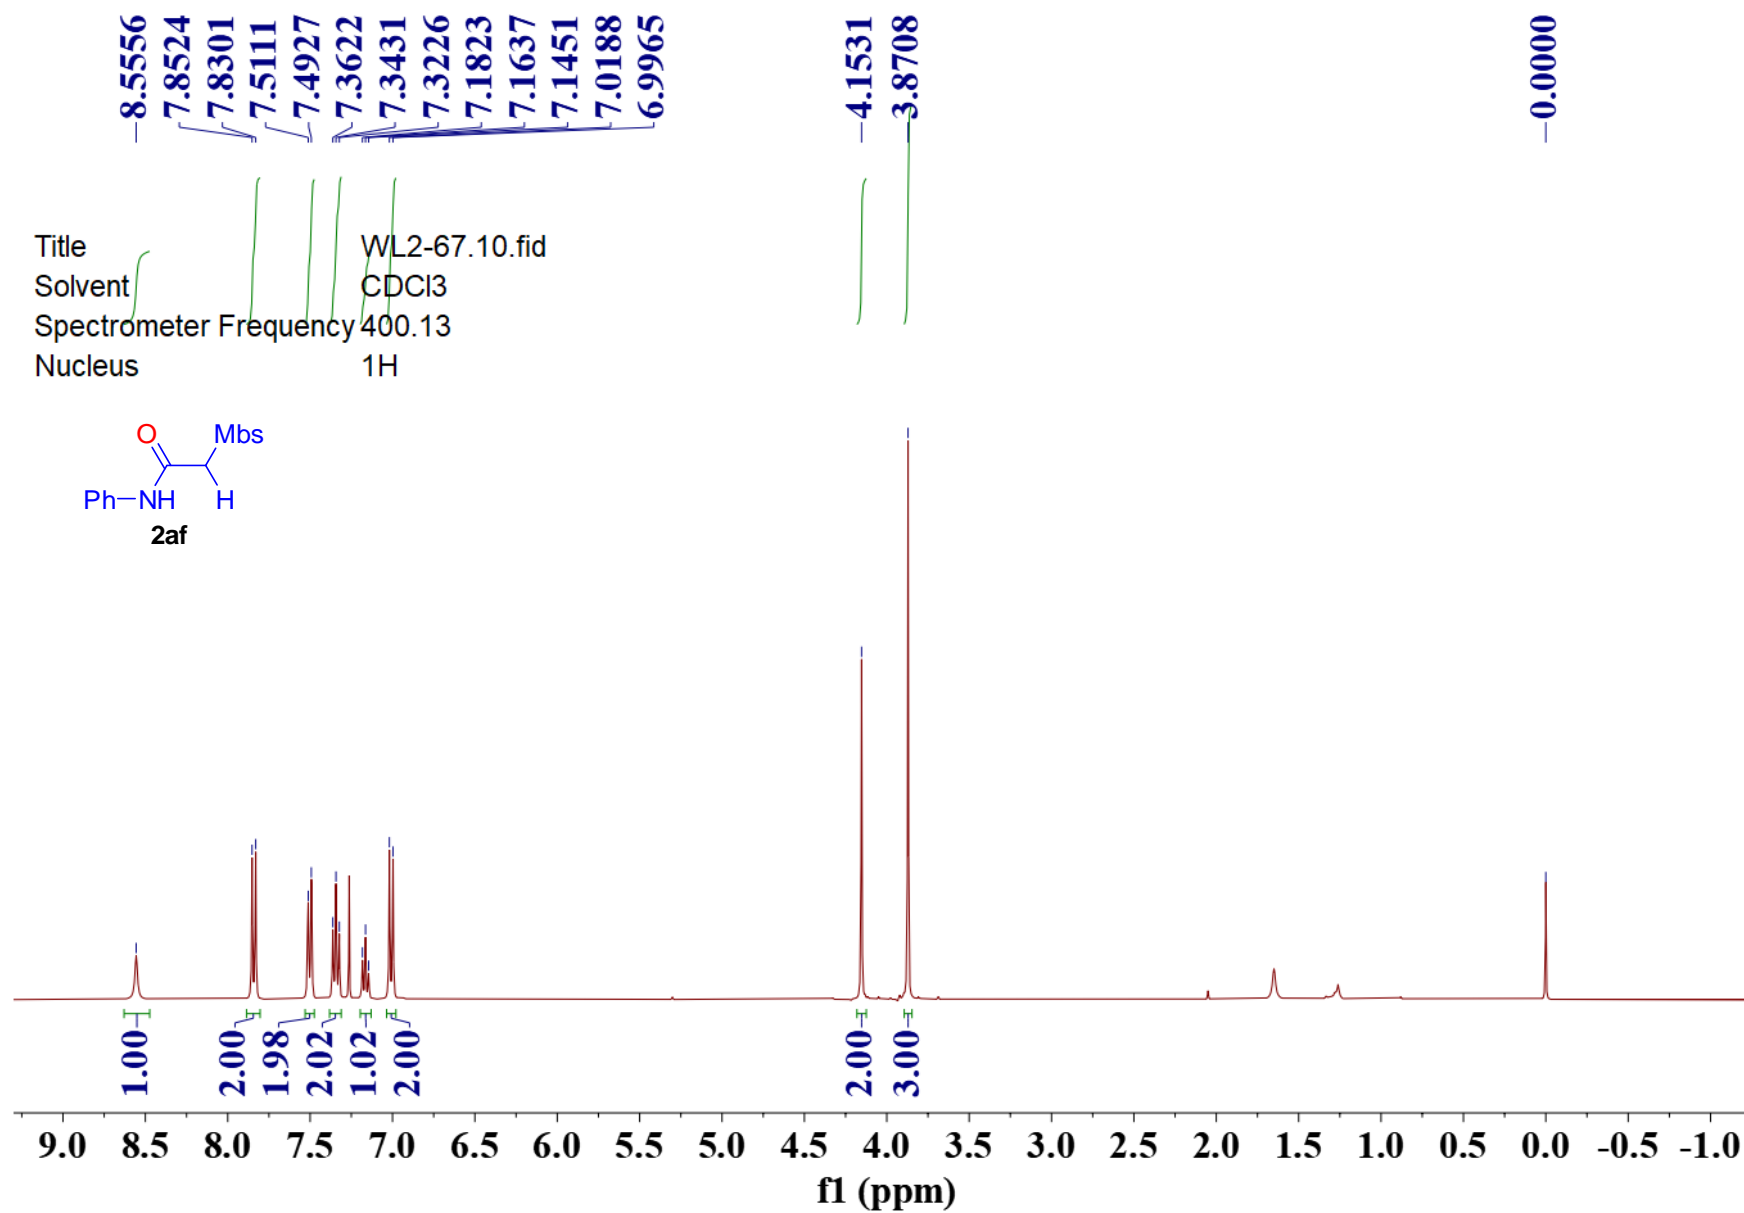

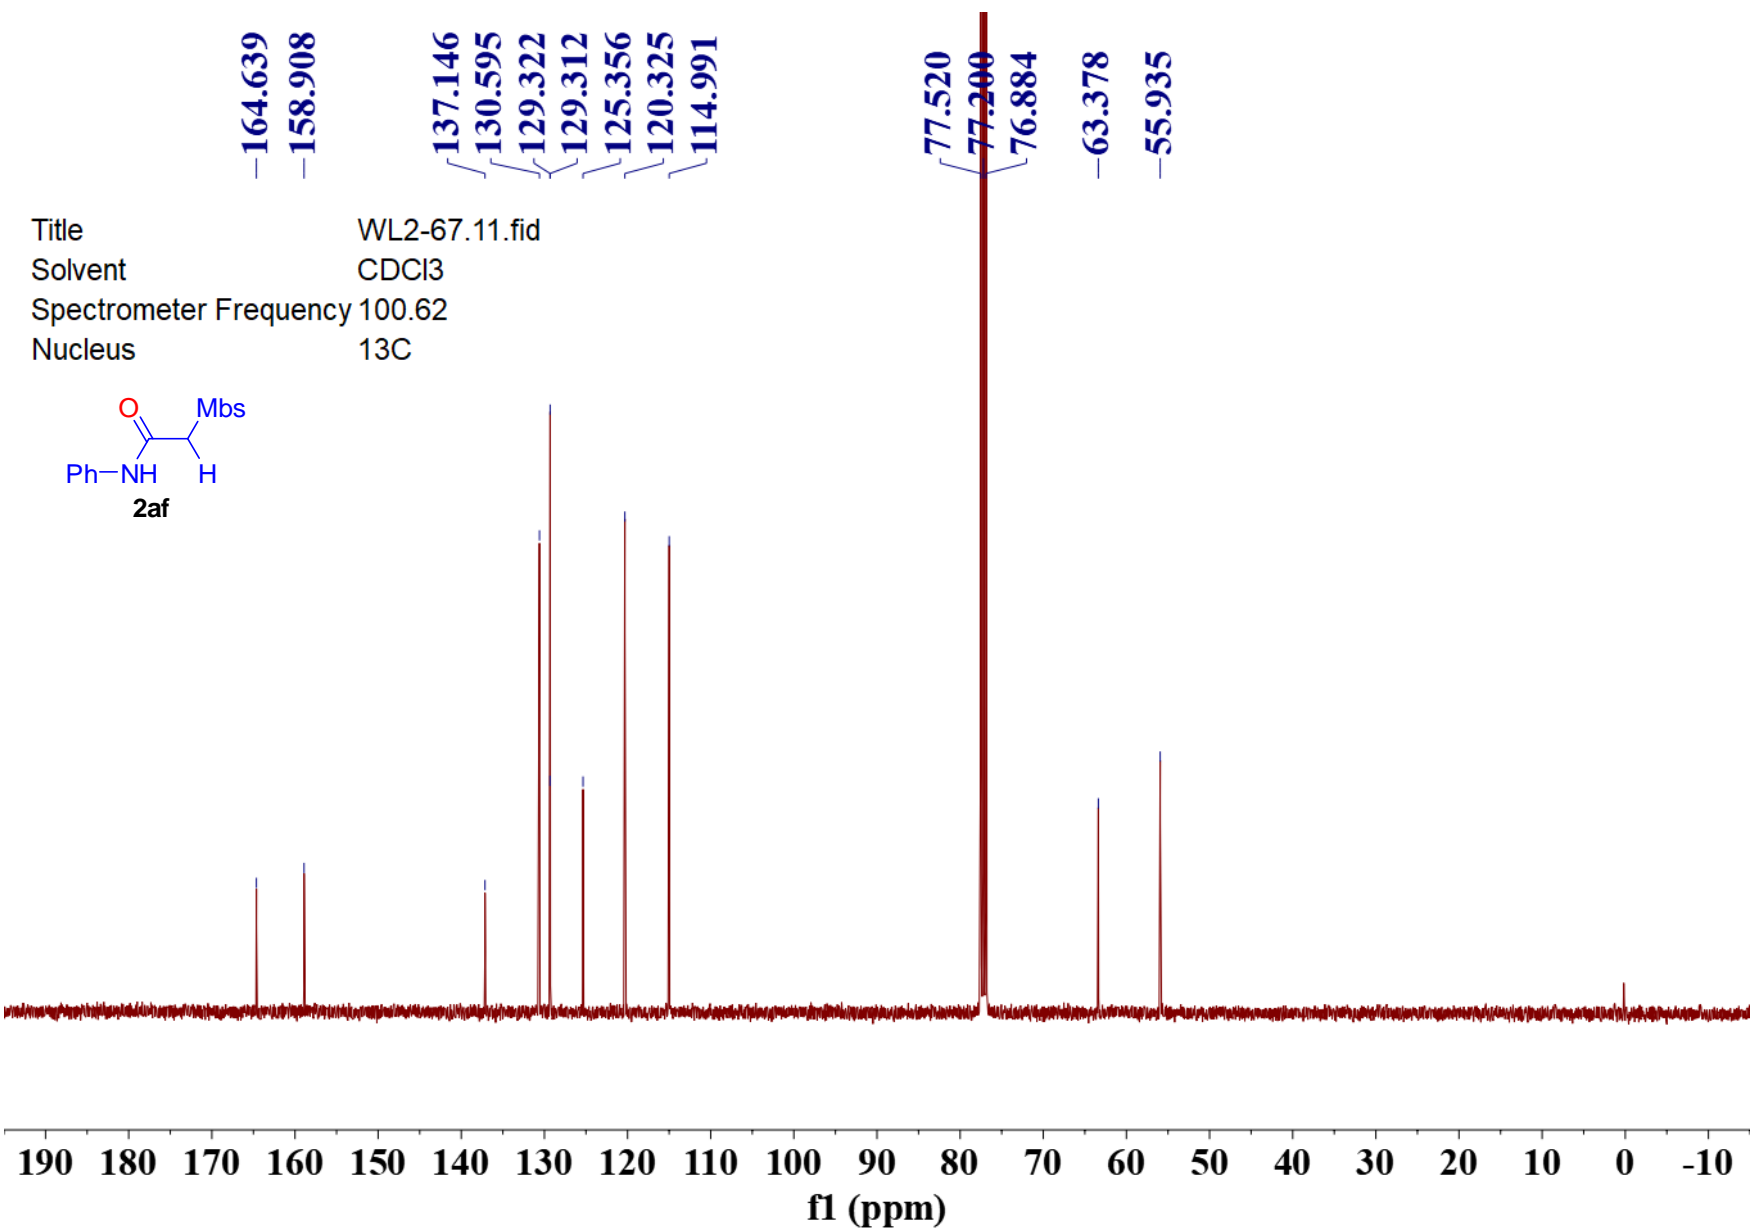

S153

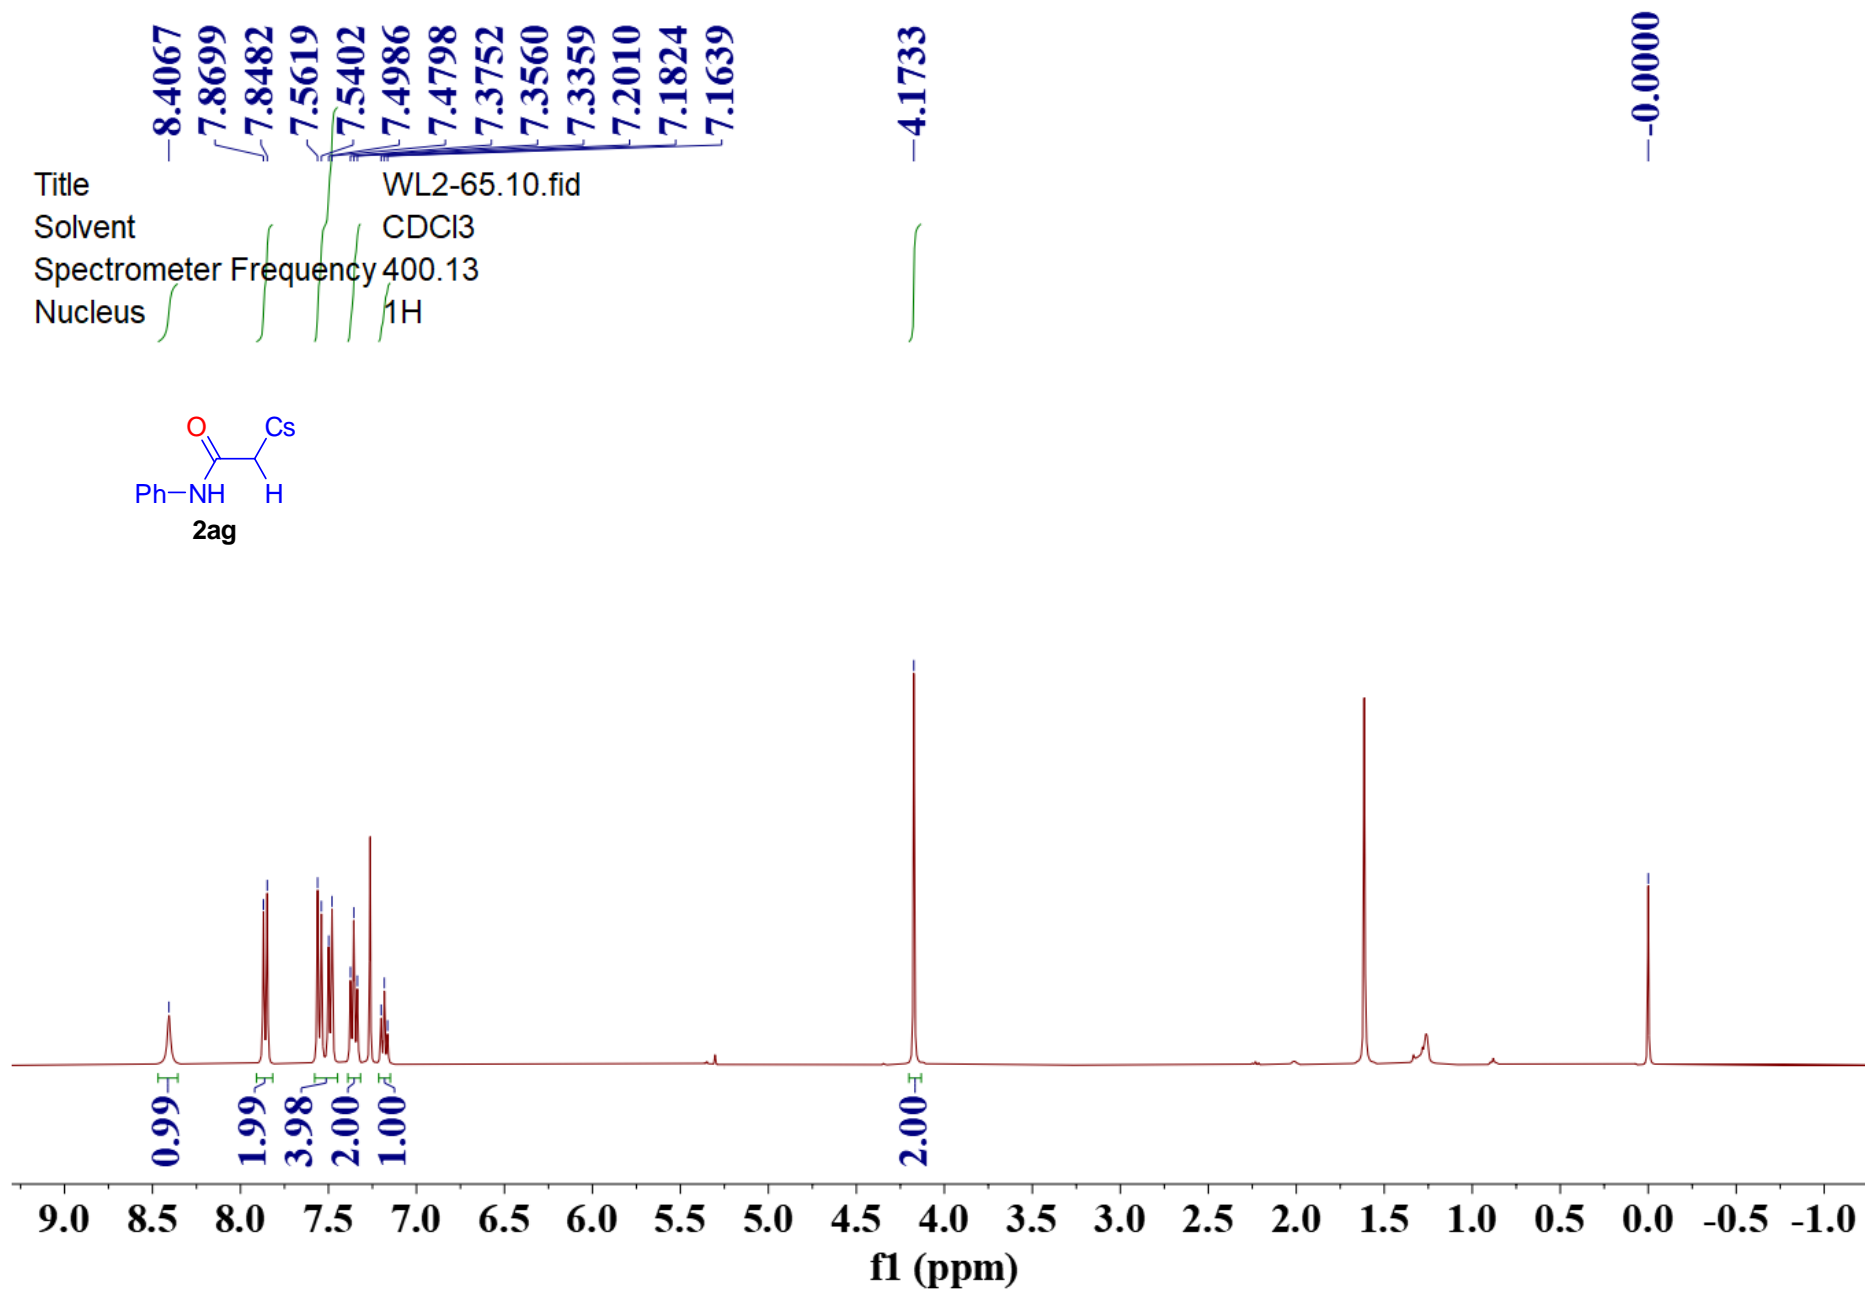

Title WL2-65.10.fid  
Solvent CDCl3  
Spectrometer Frequency 100.62  
Nucleus 13C

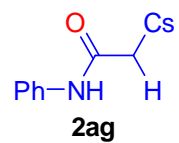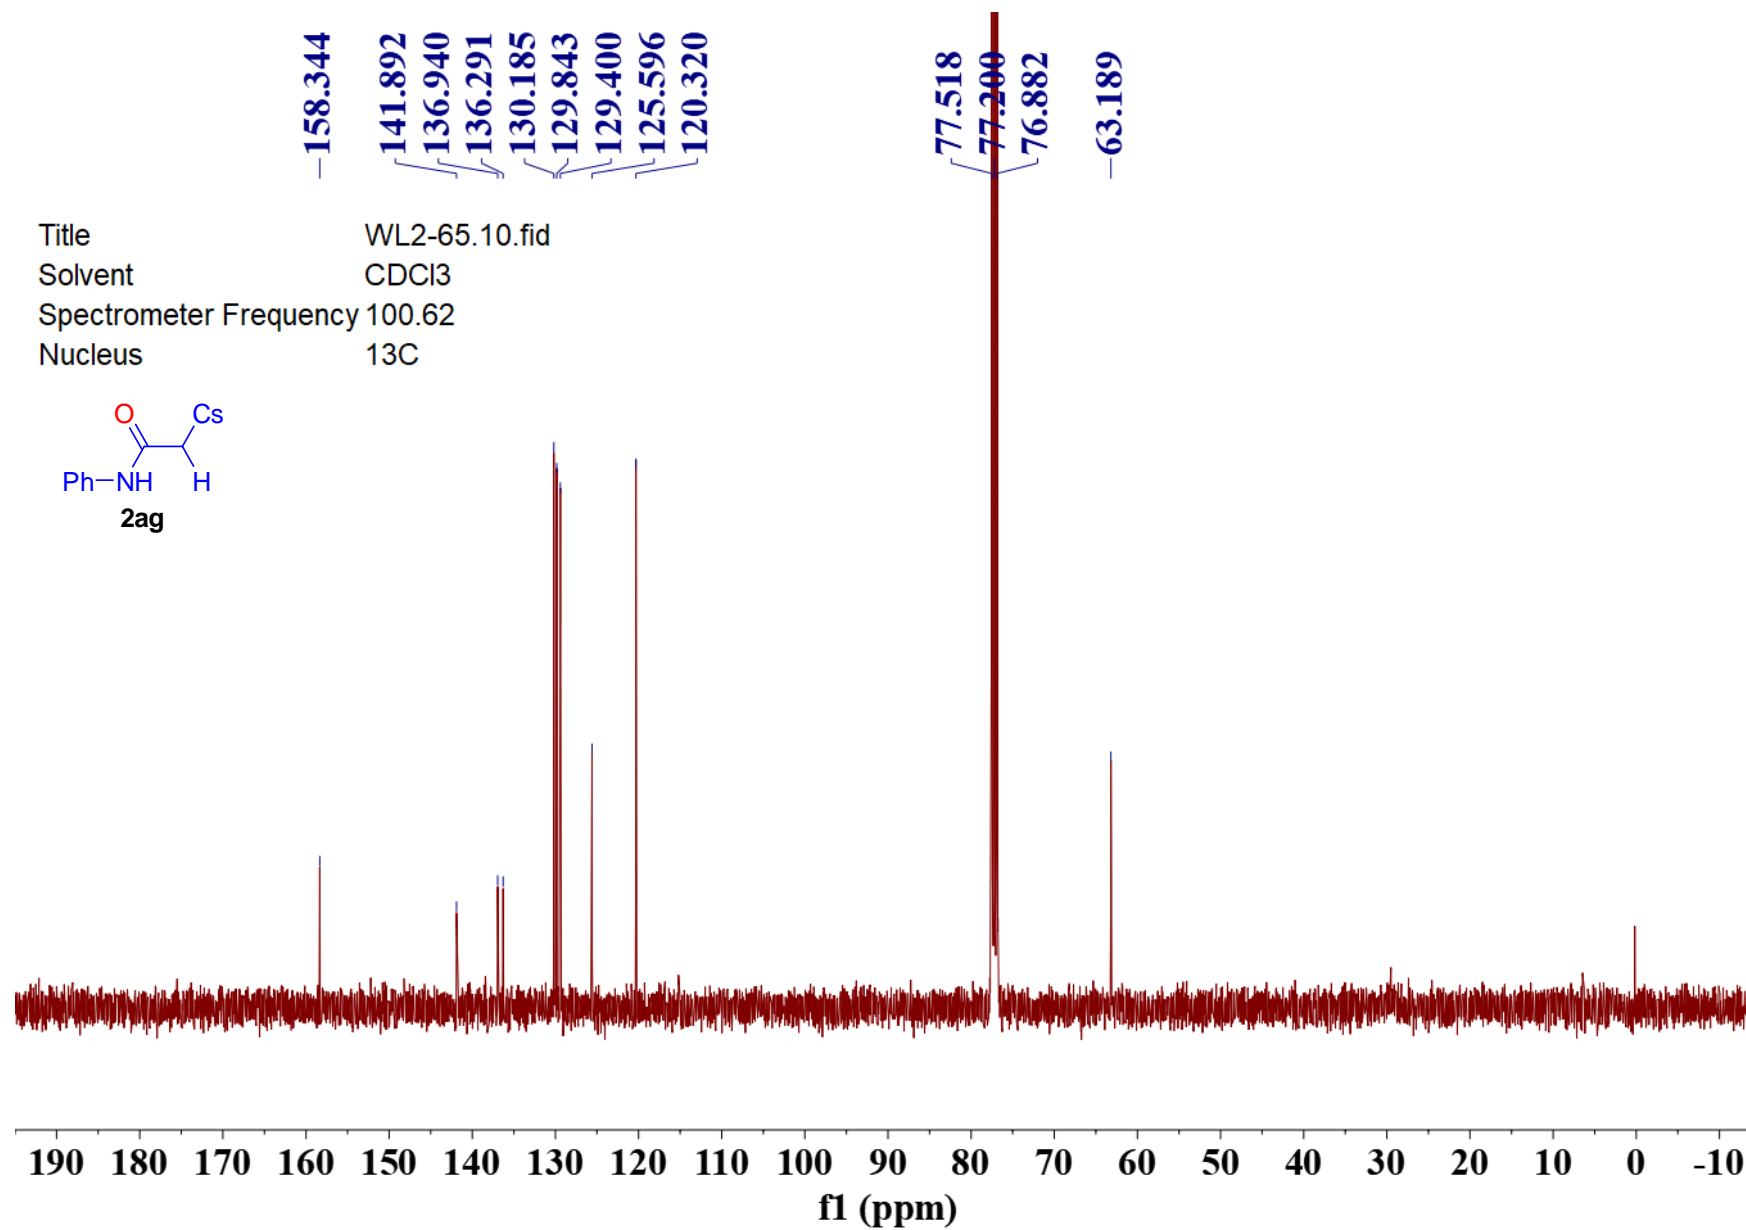



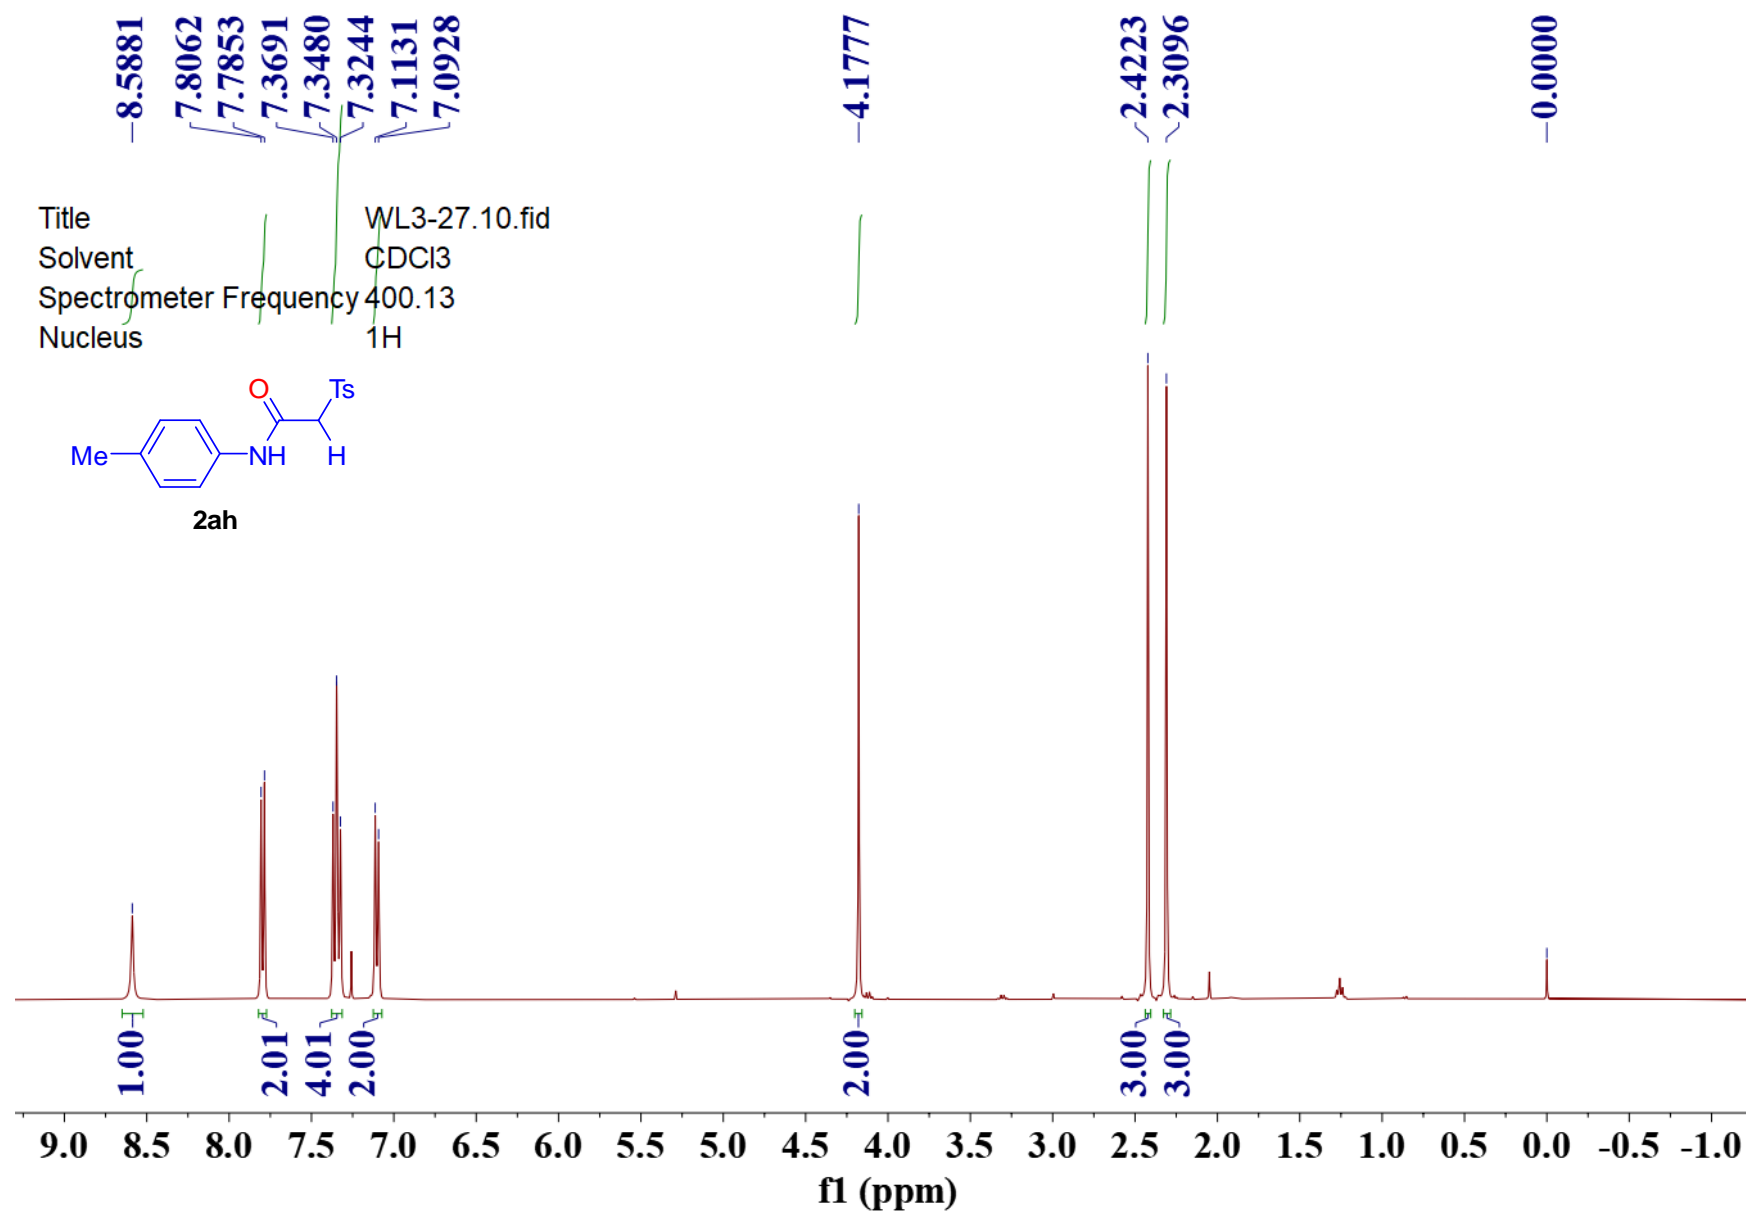

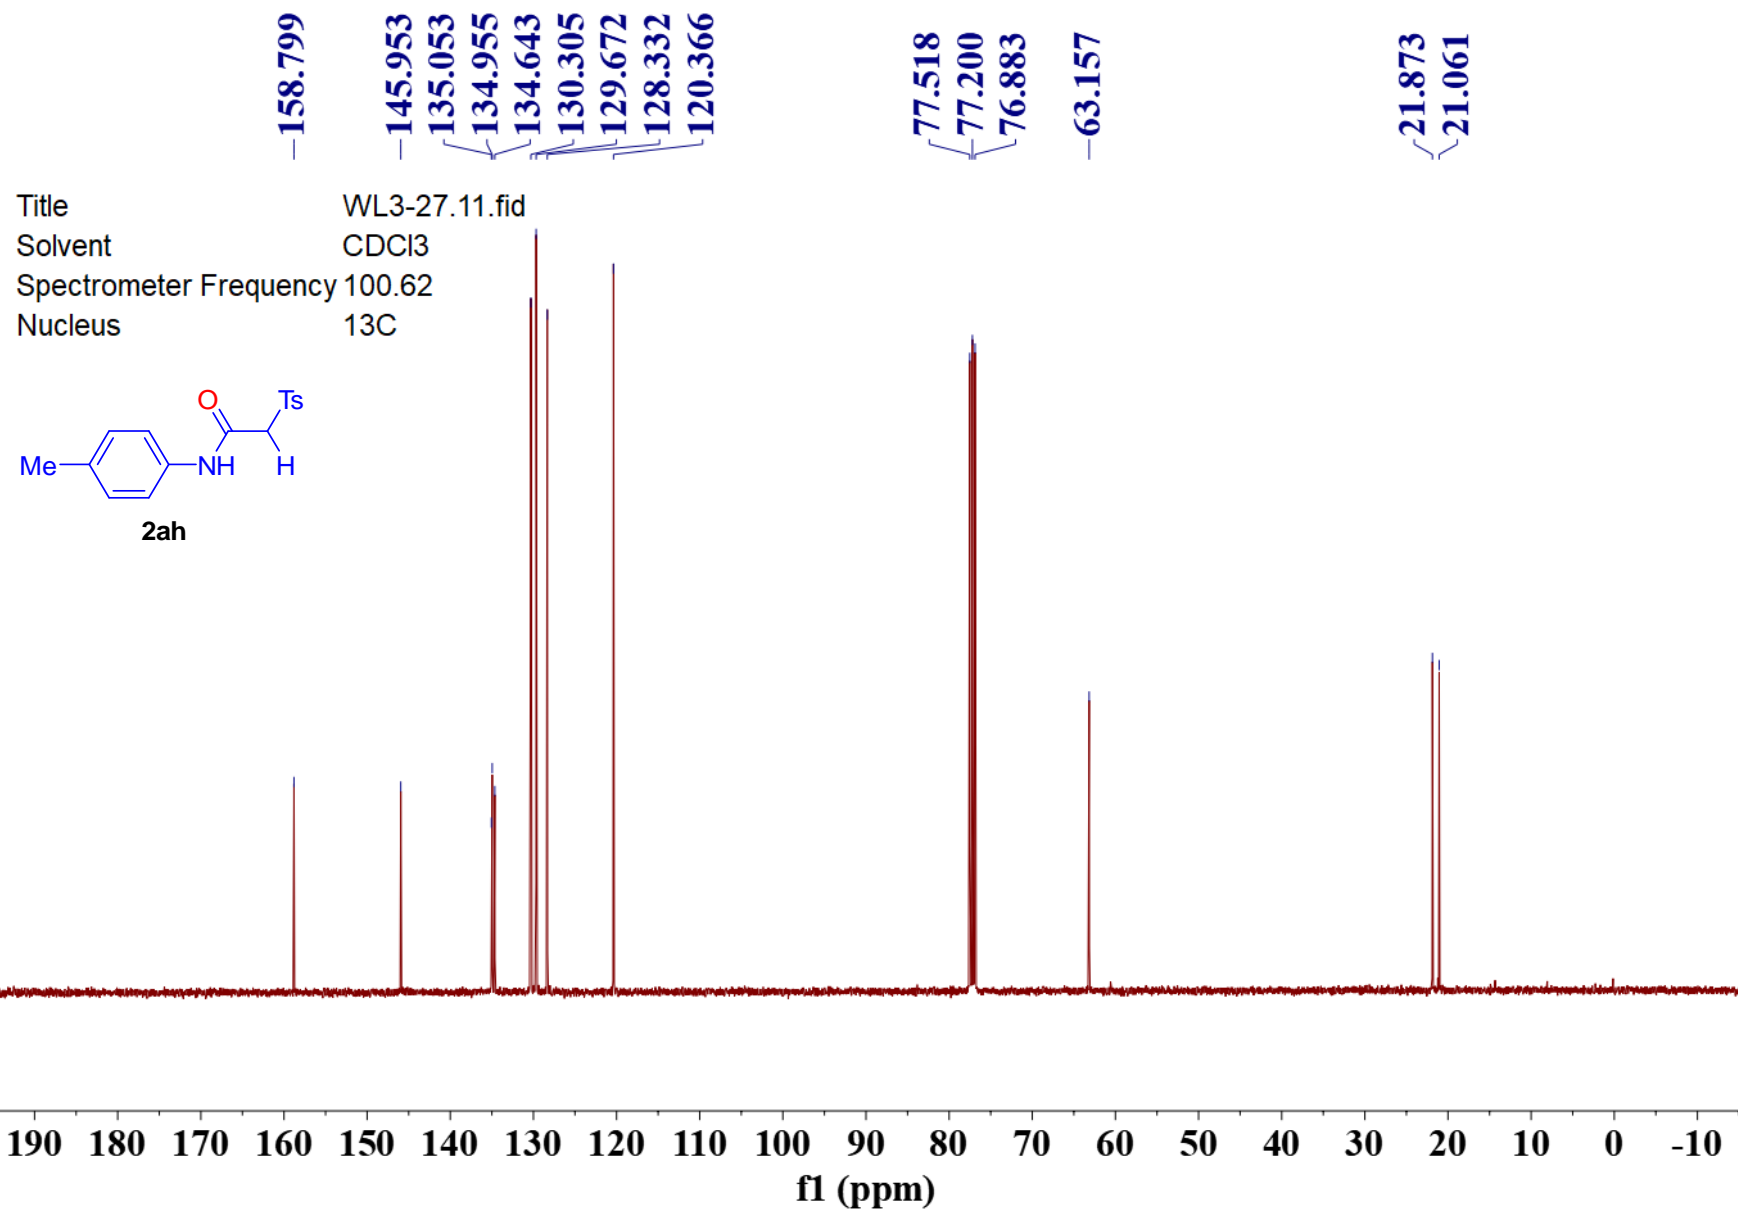

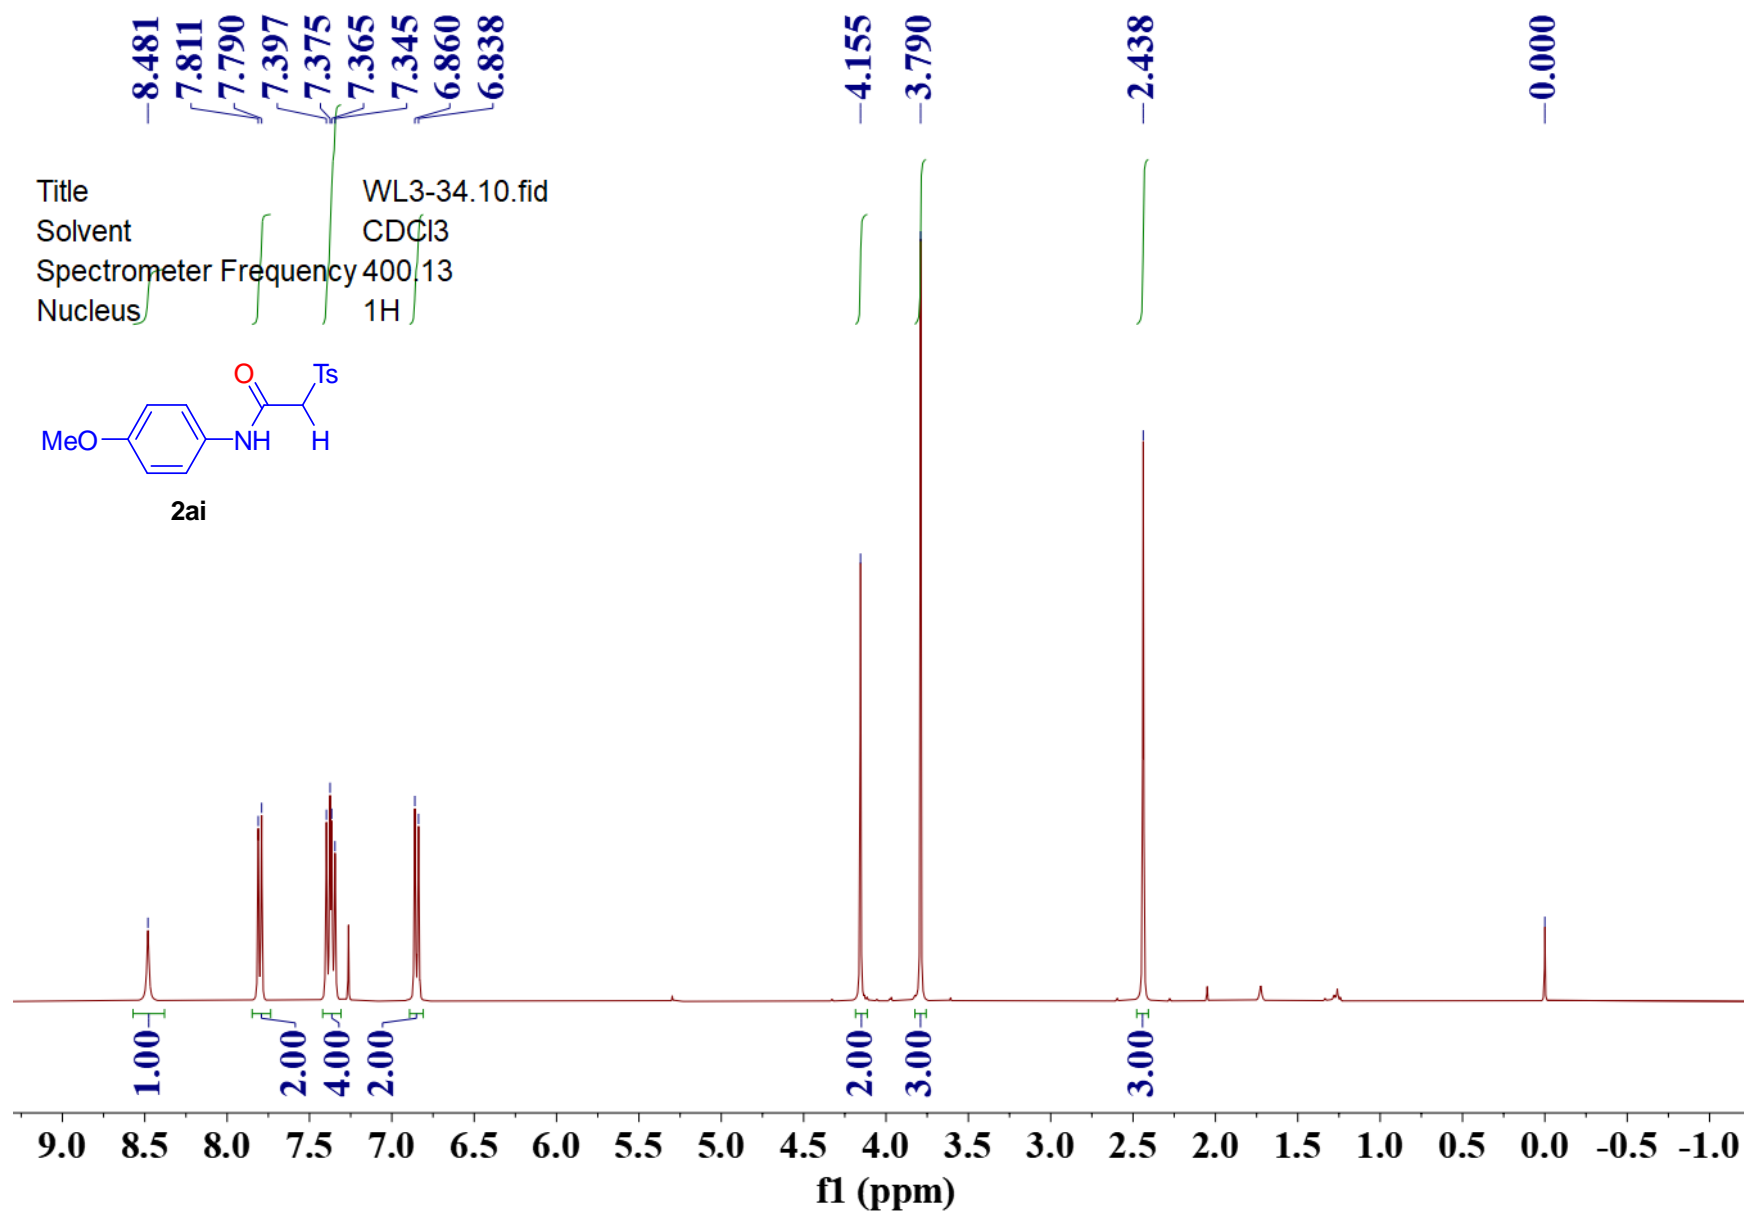

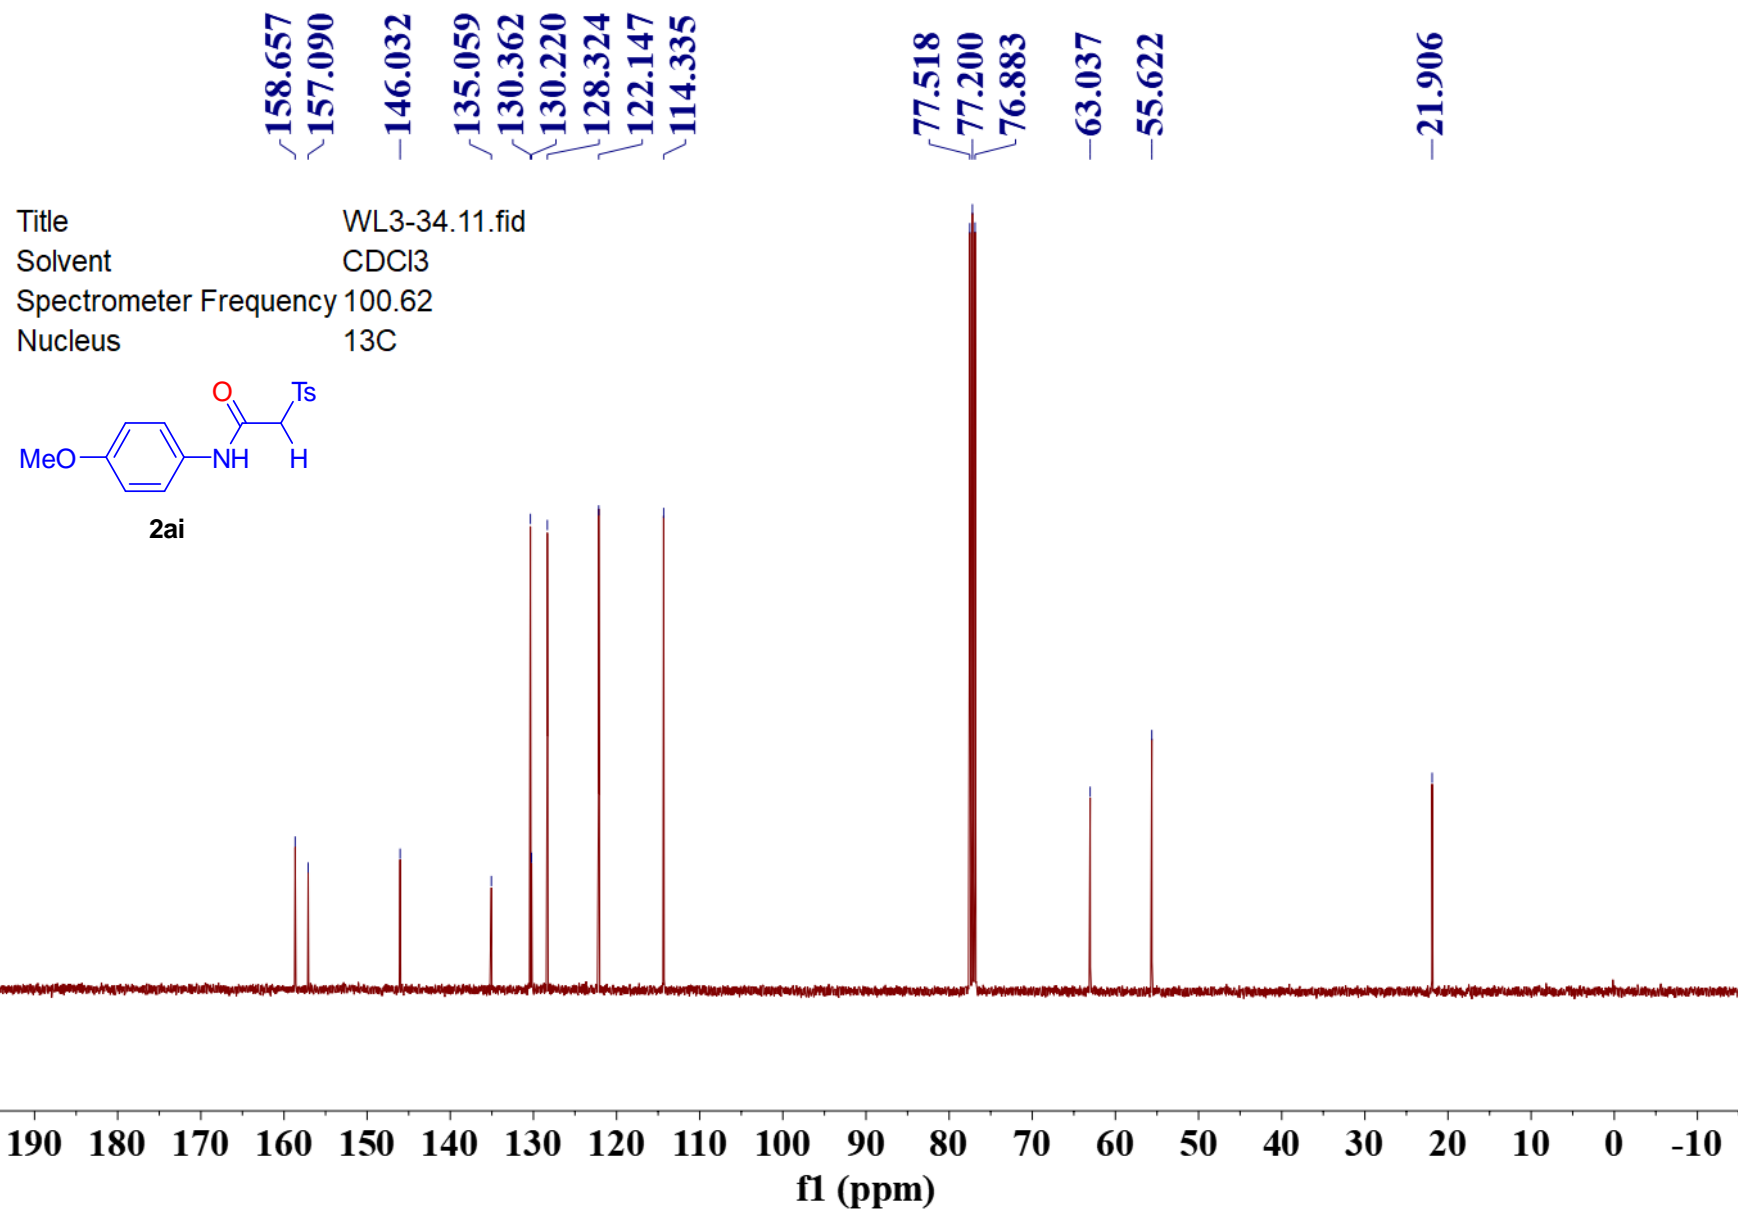

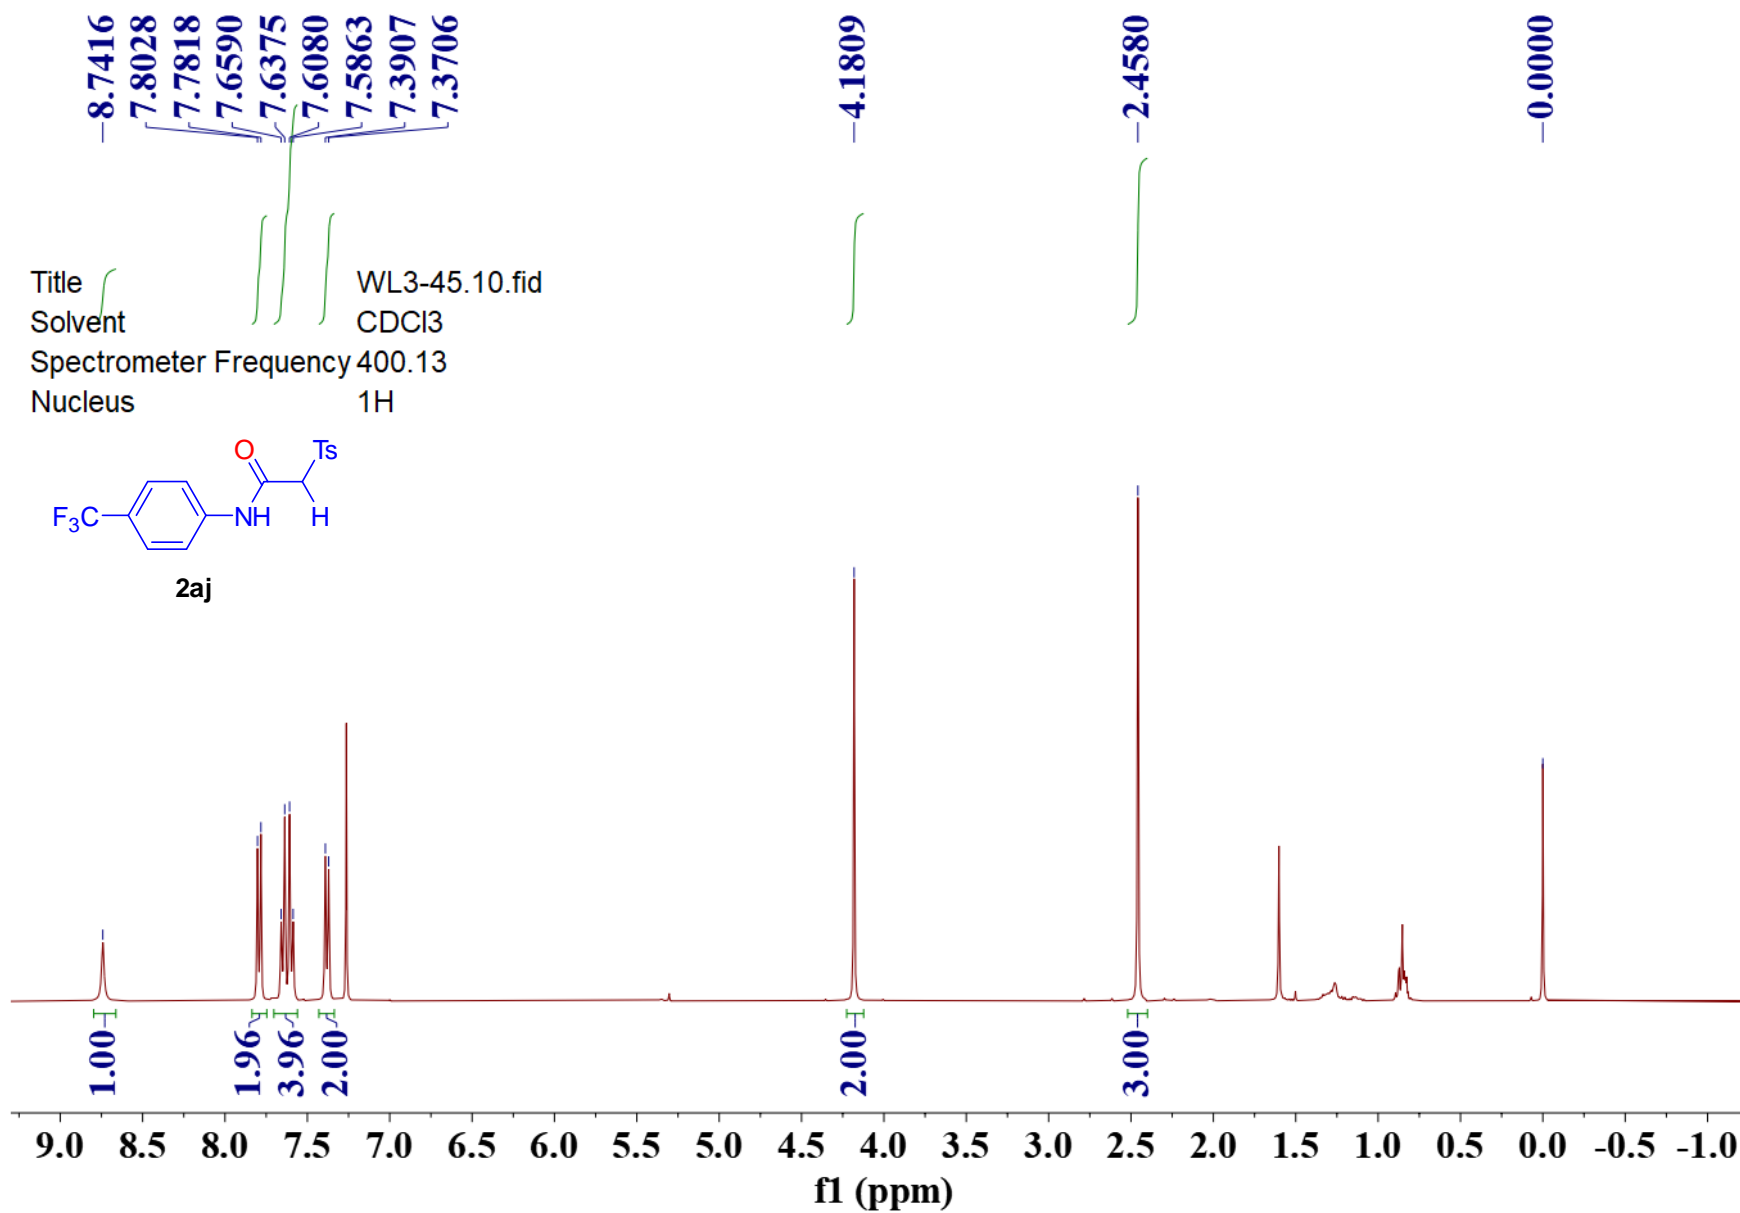

S160

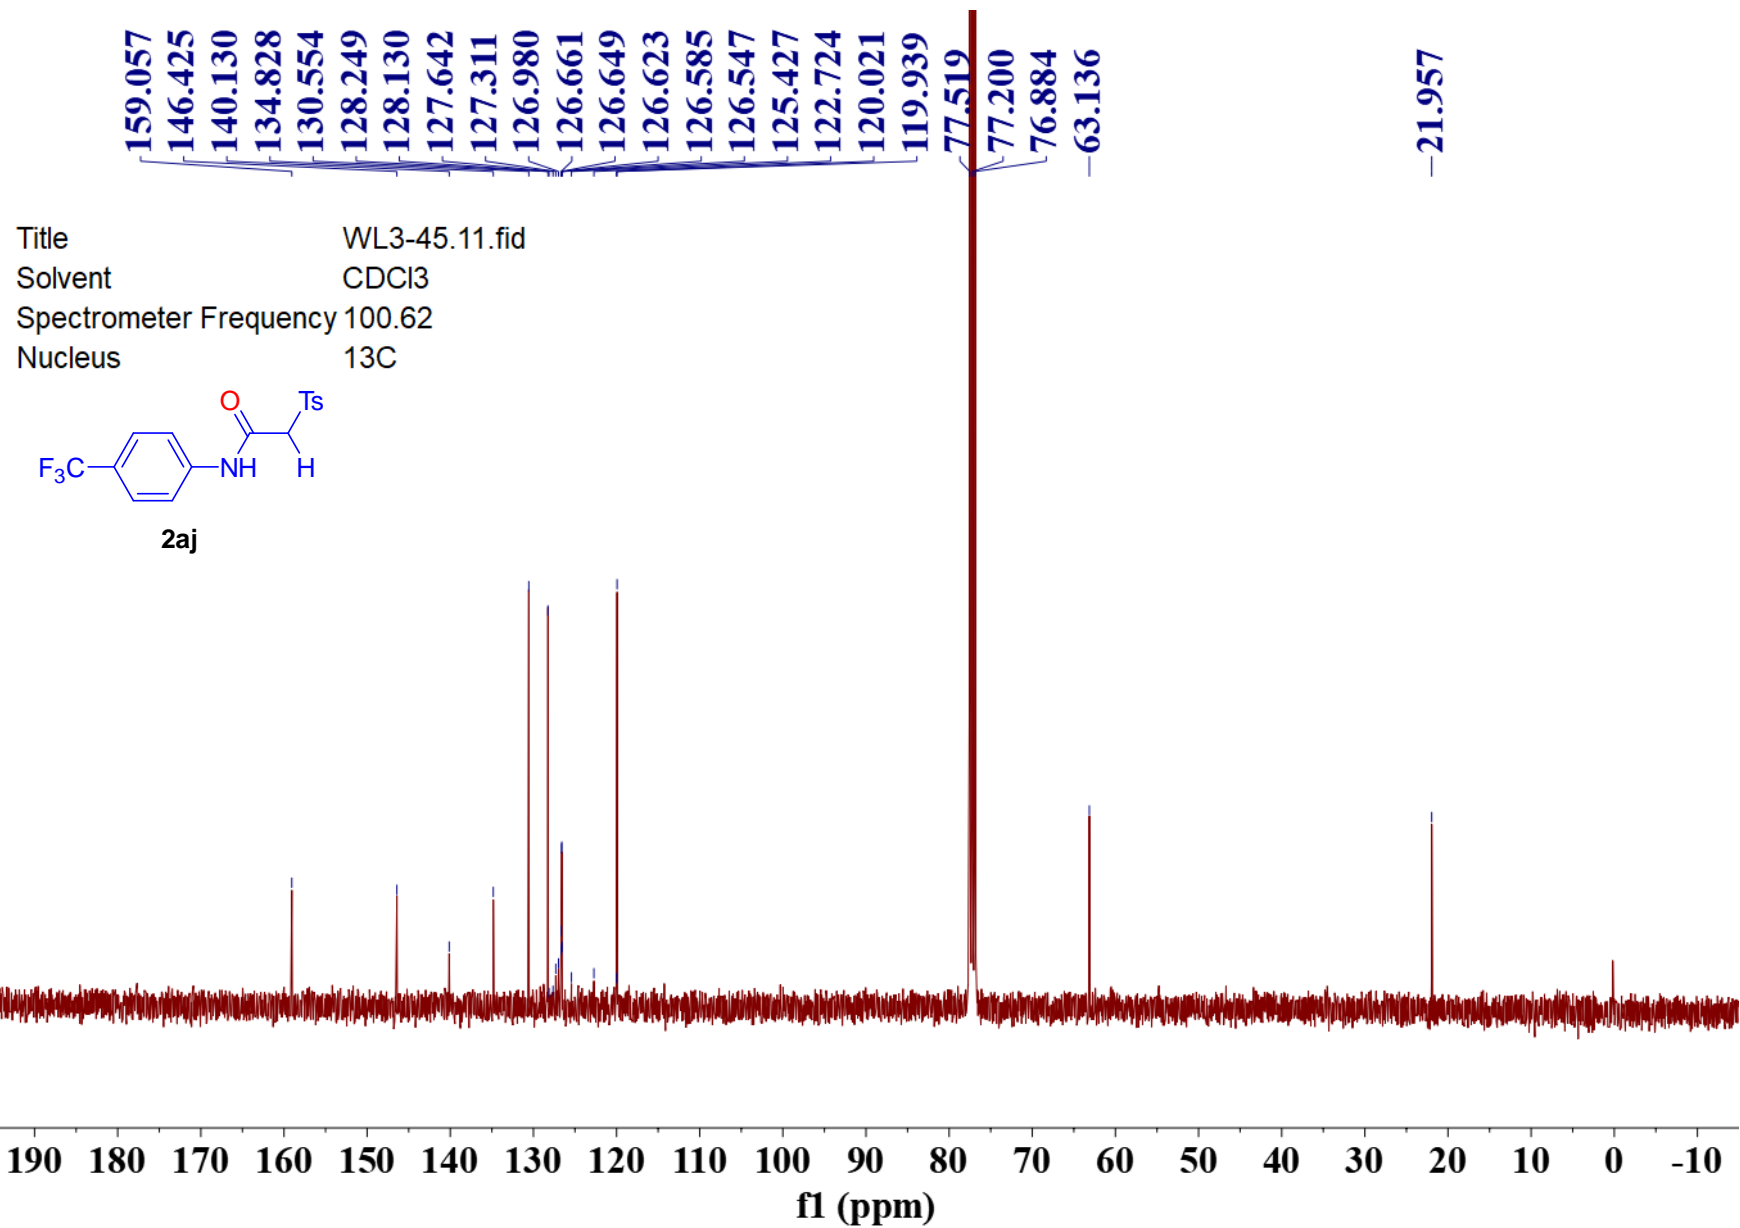

|                        |               |
|------------------------|---------------|
| Title                  | WL3-45.11.fid |
| Solvent                | CDCl3         |
| Spectrometer Frequency | 376.46        |
| Nucleus                | 19F           |

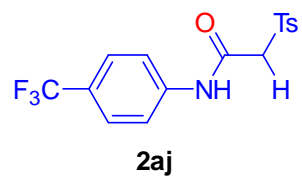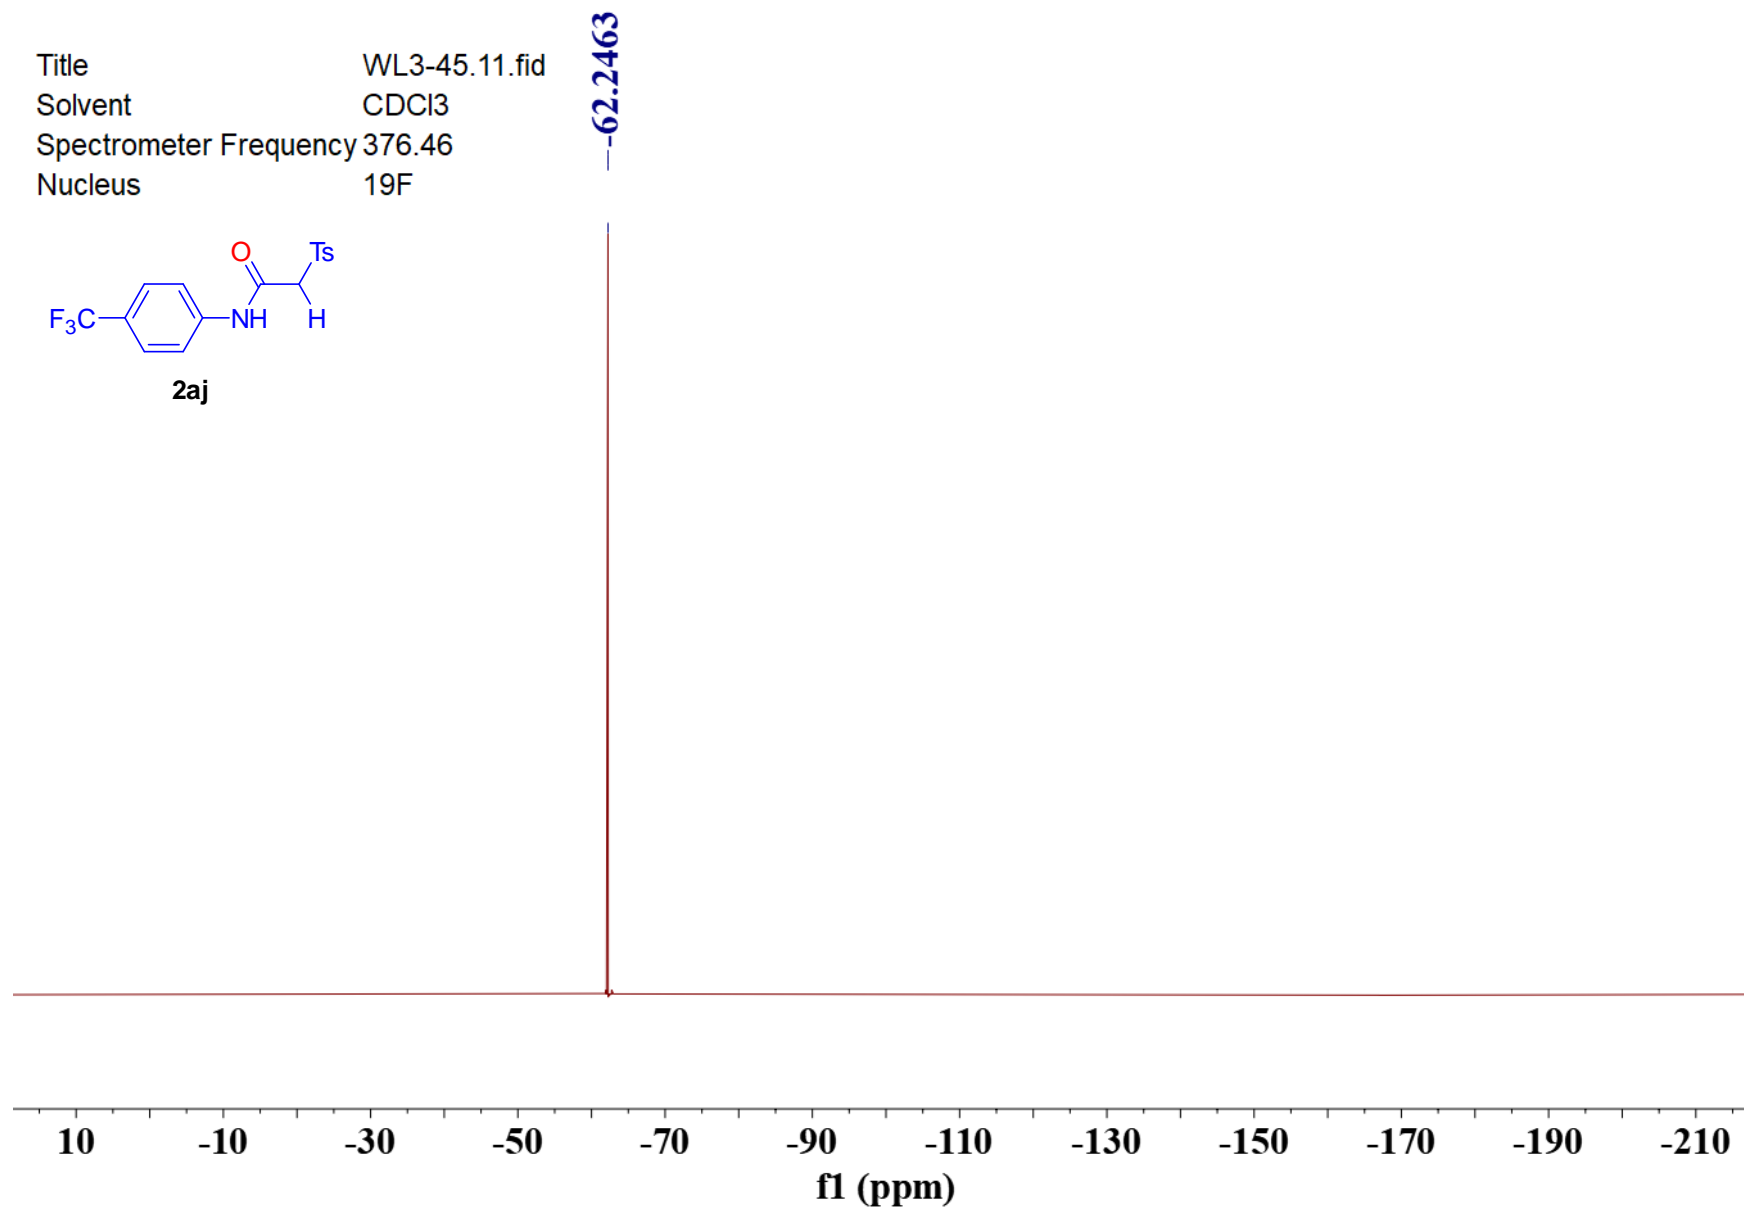

S162

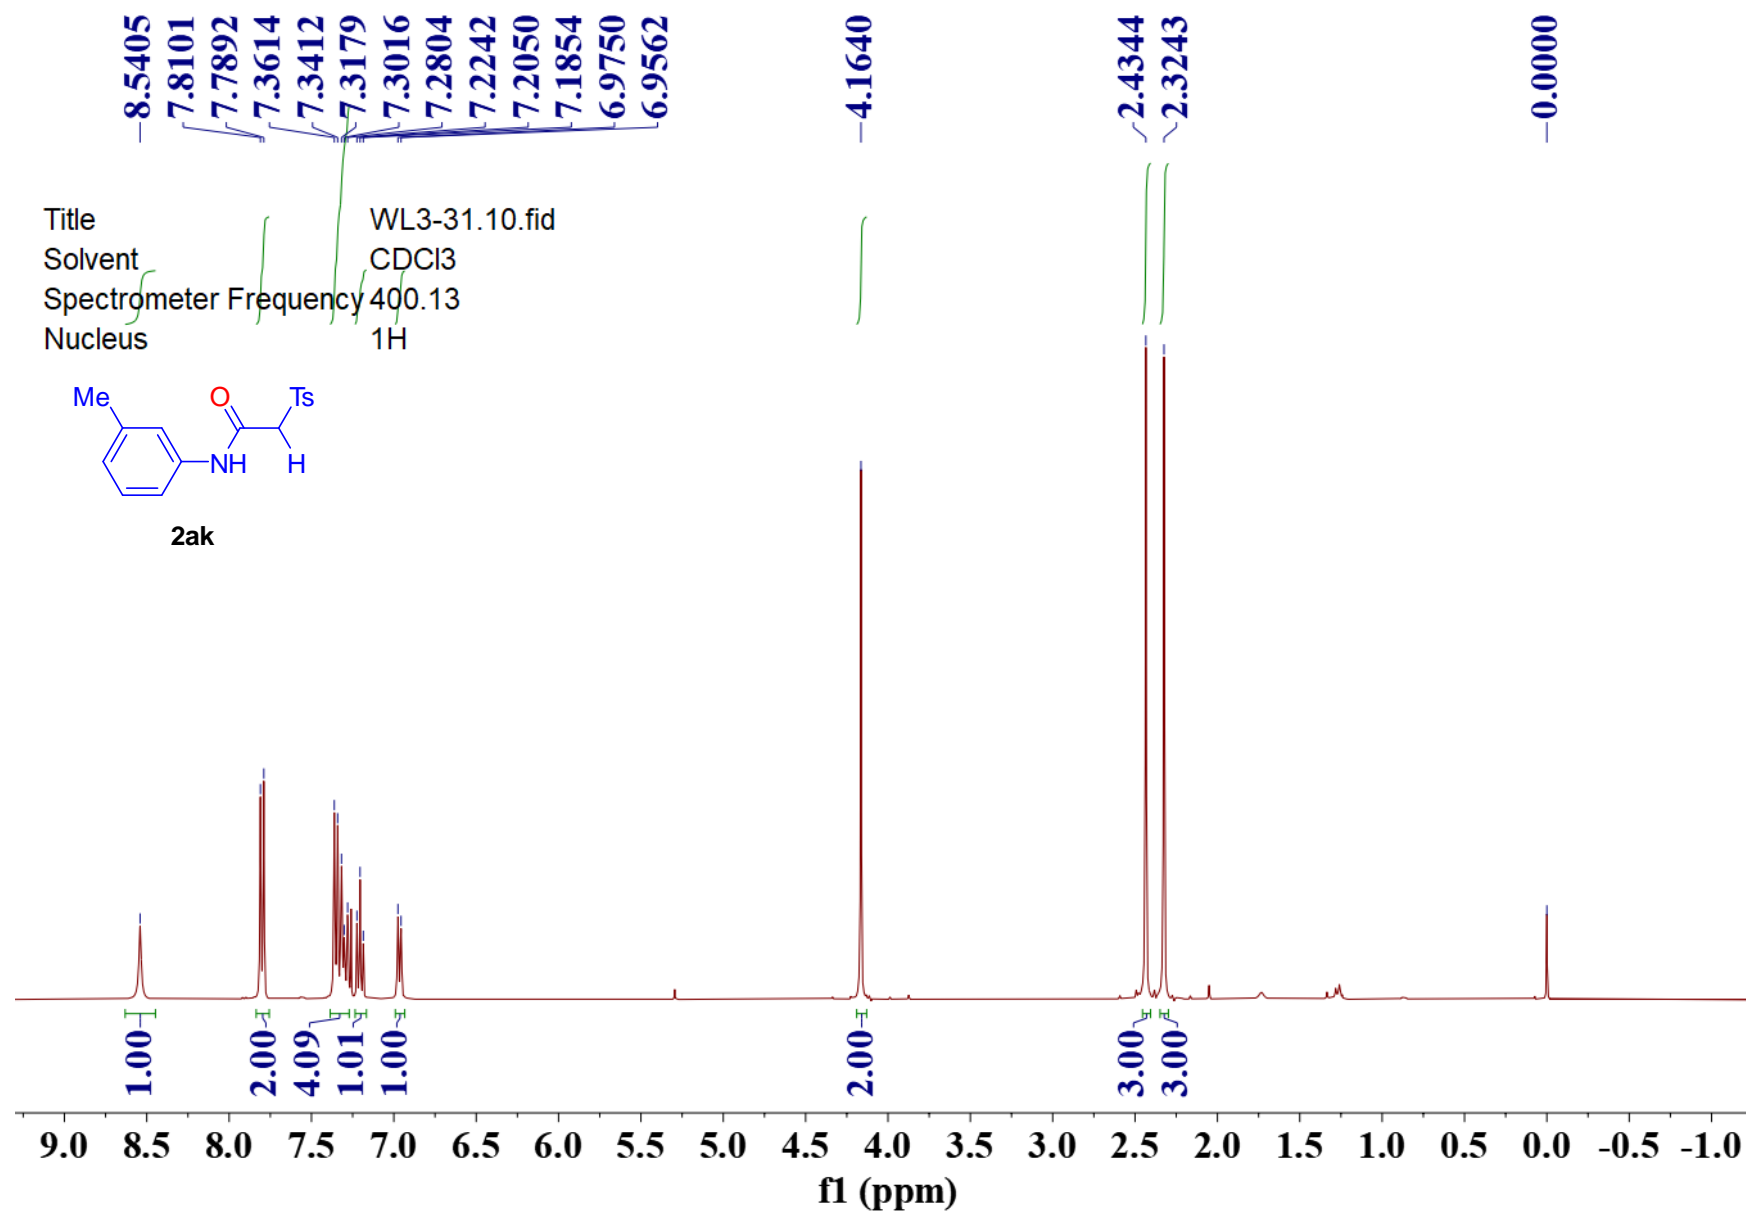



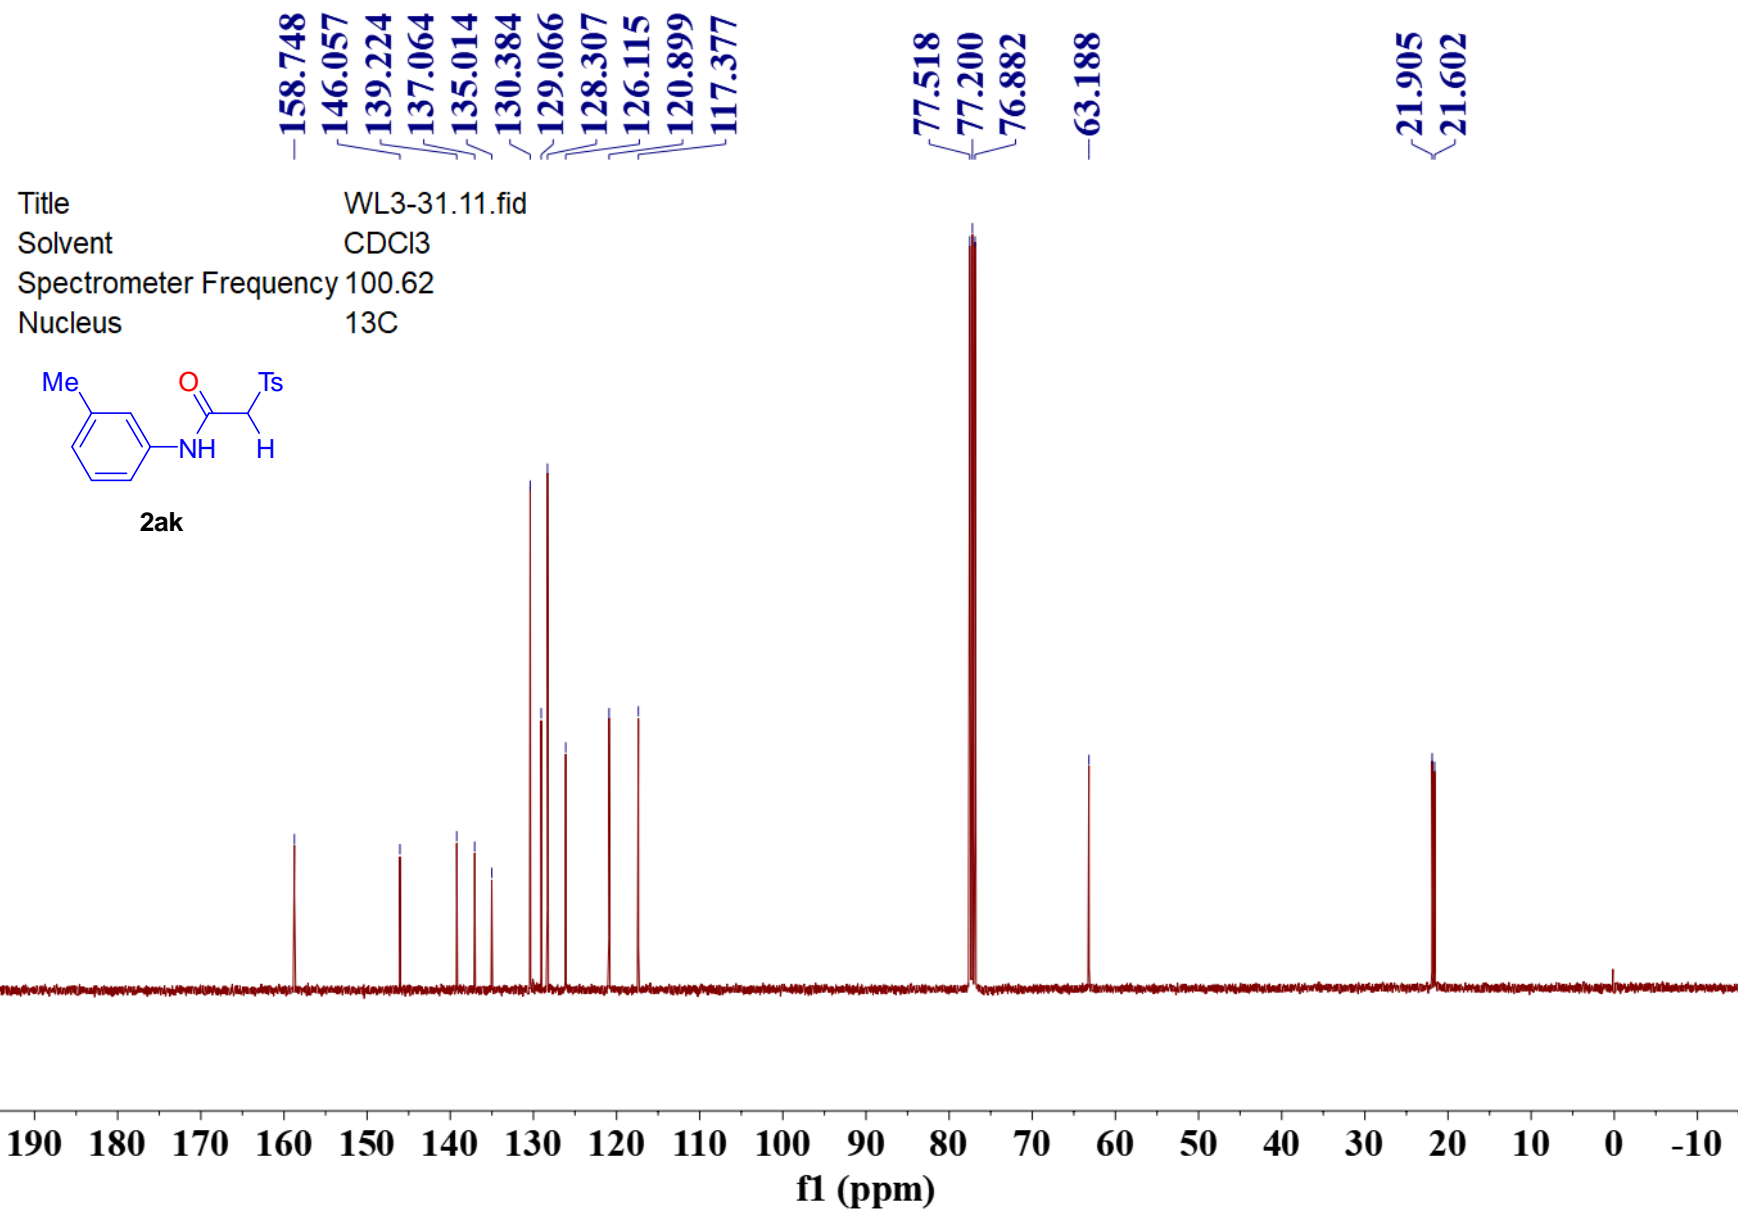

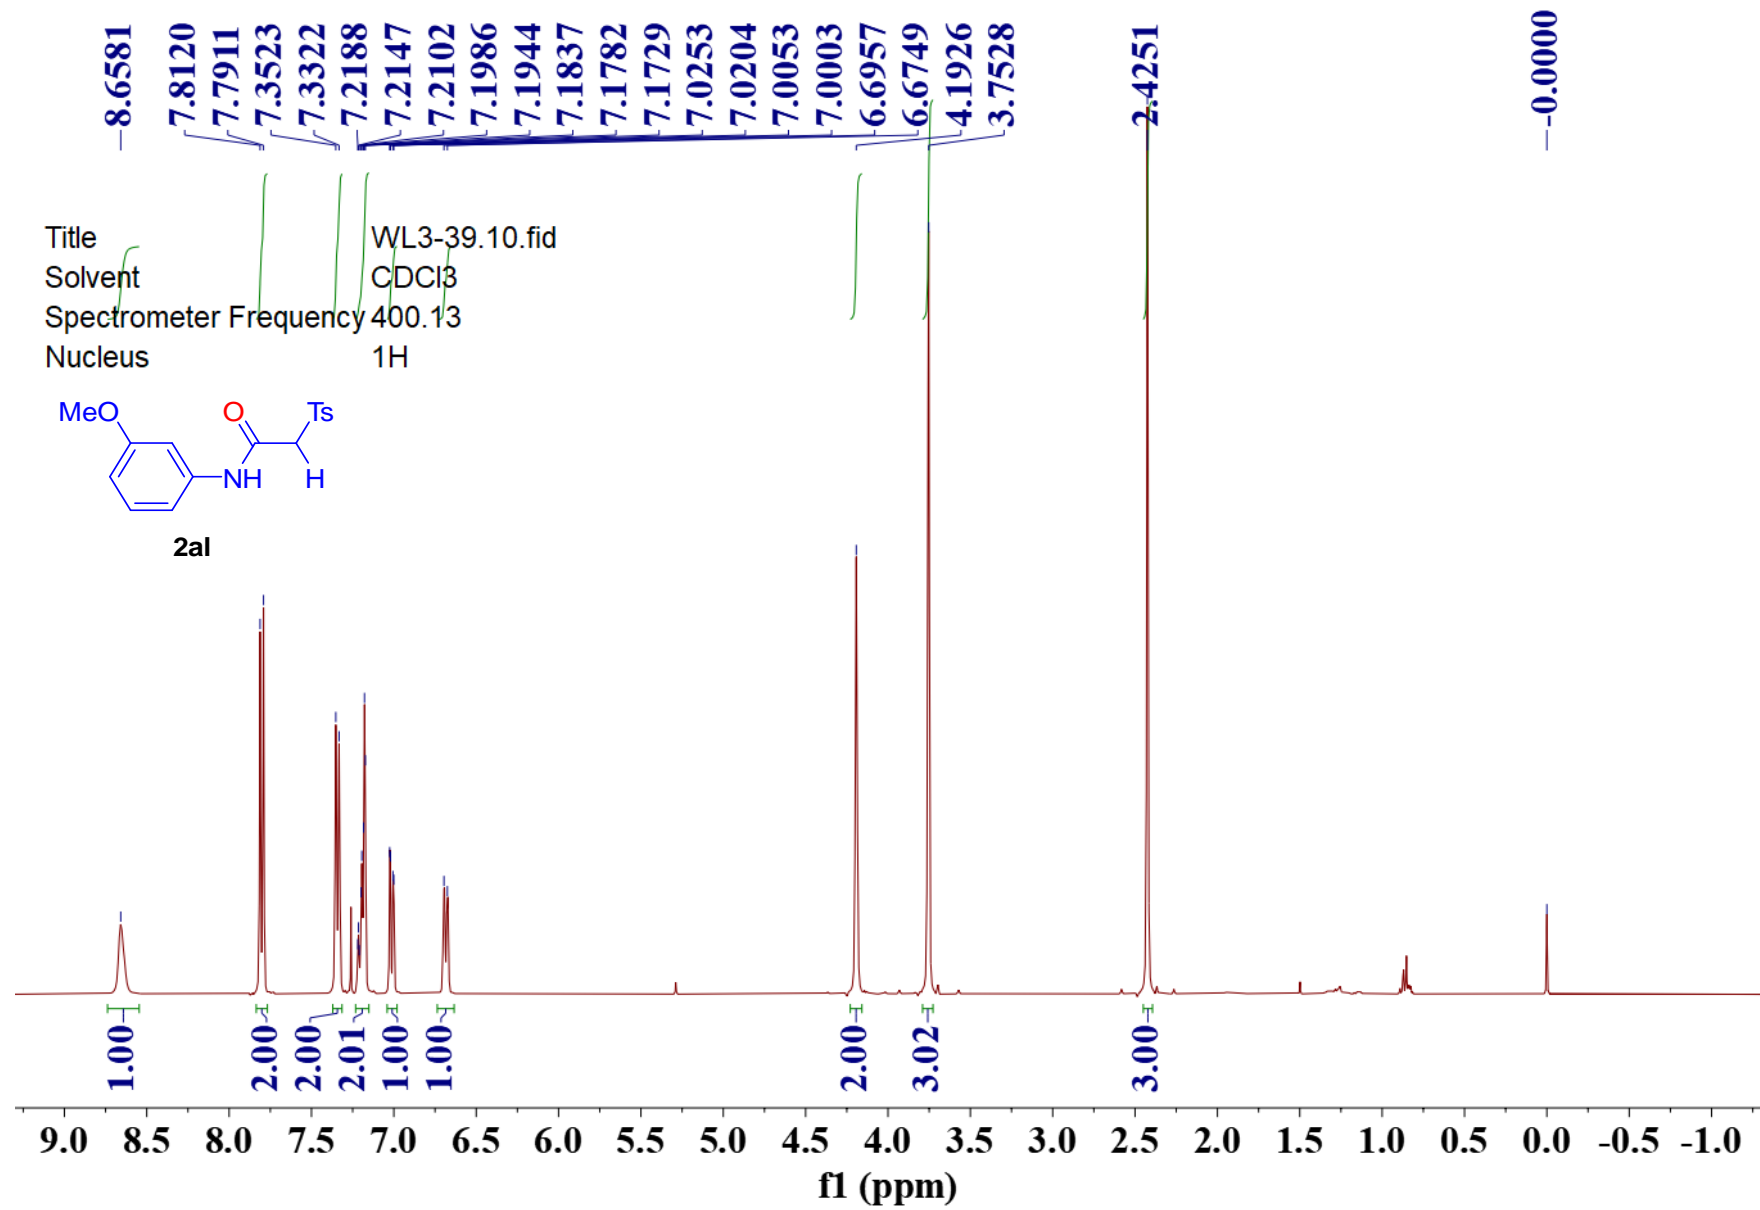

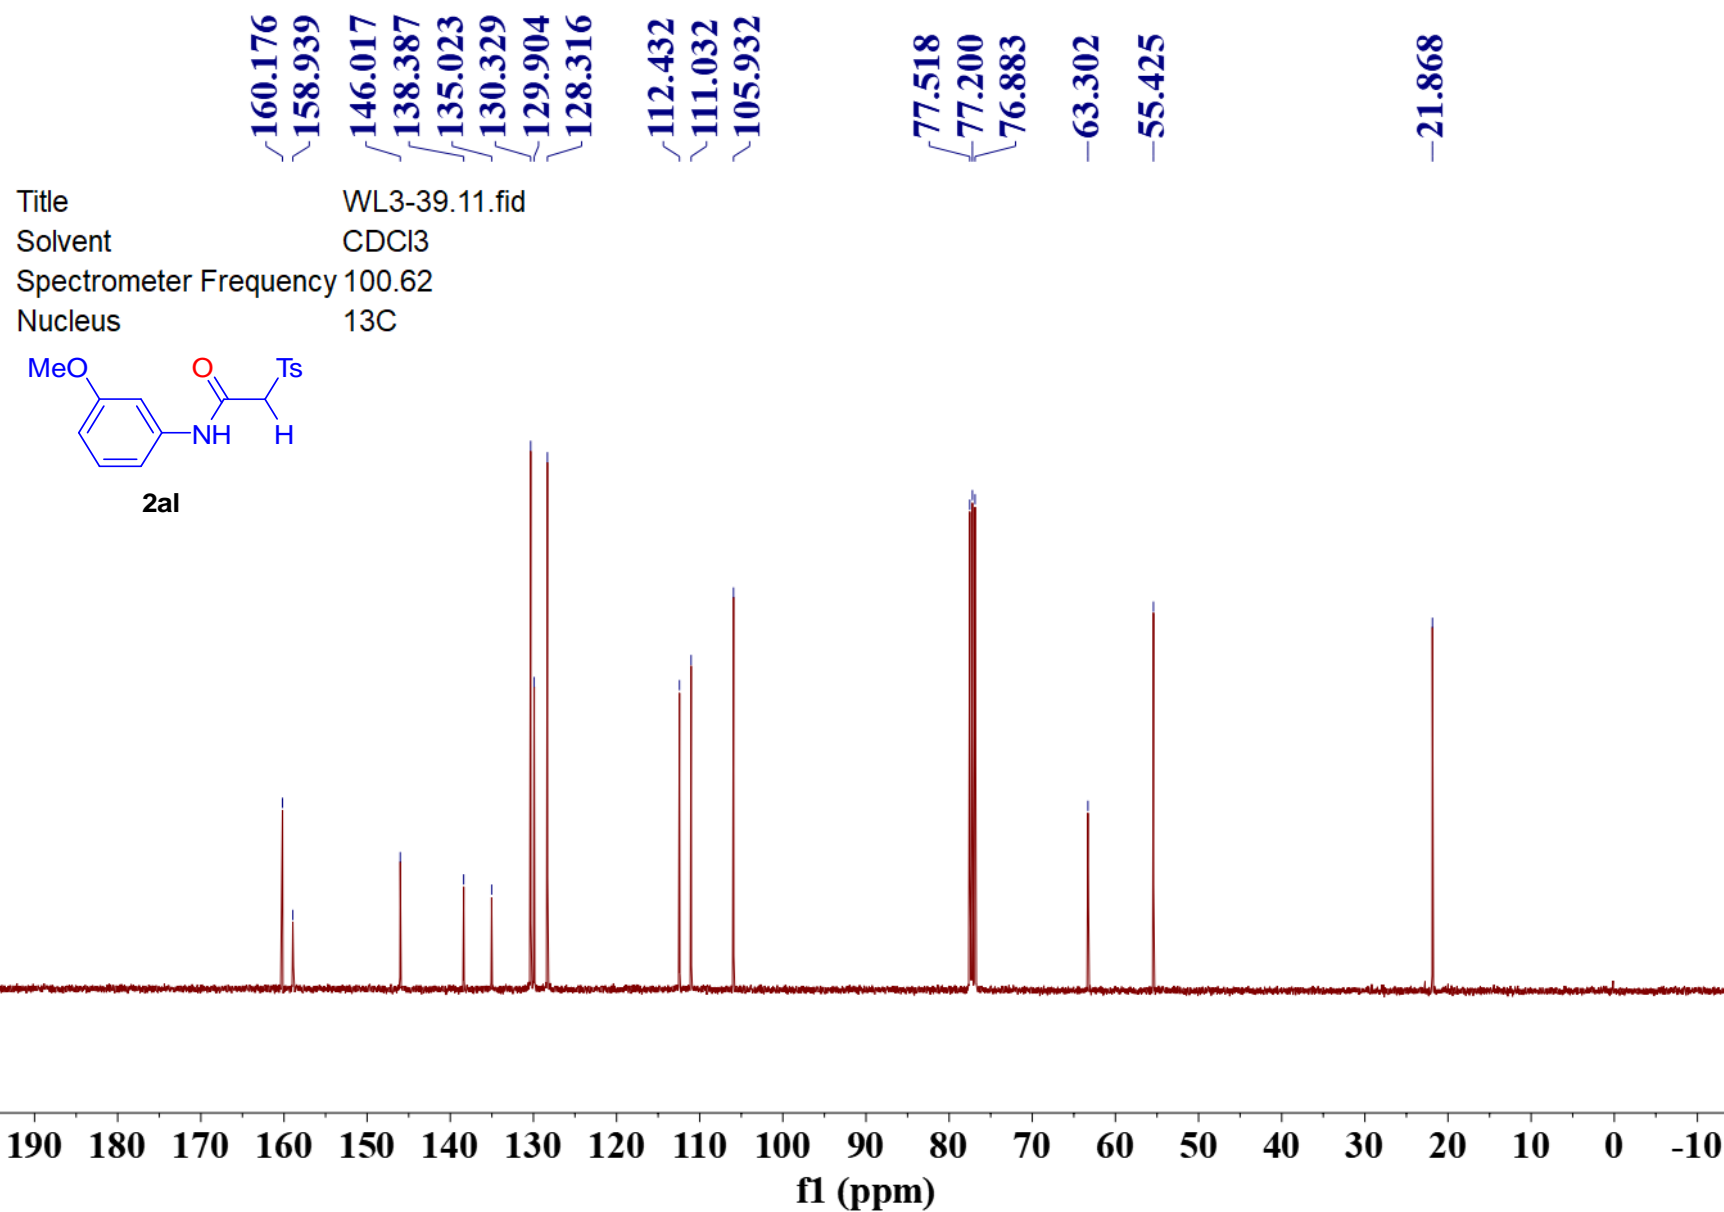

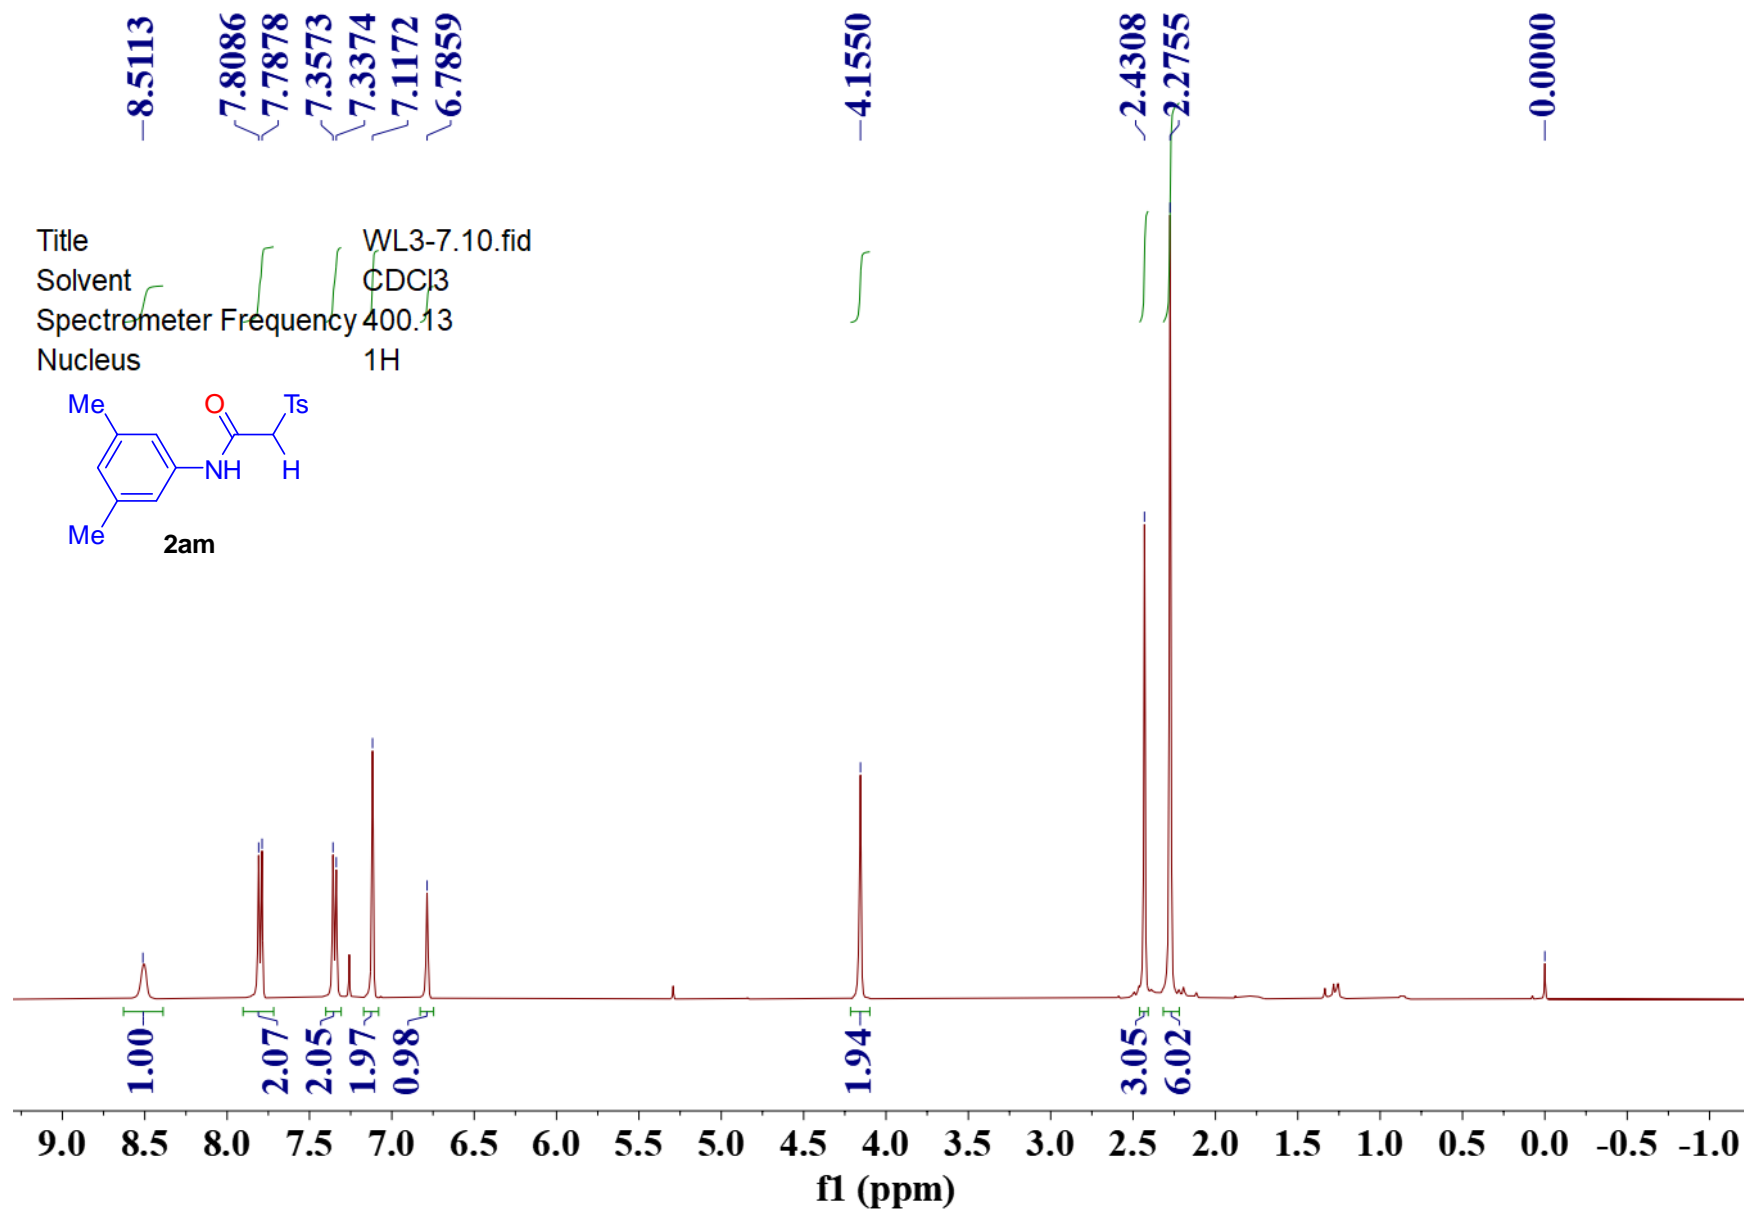

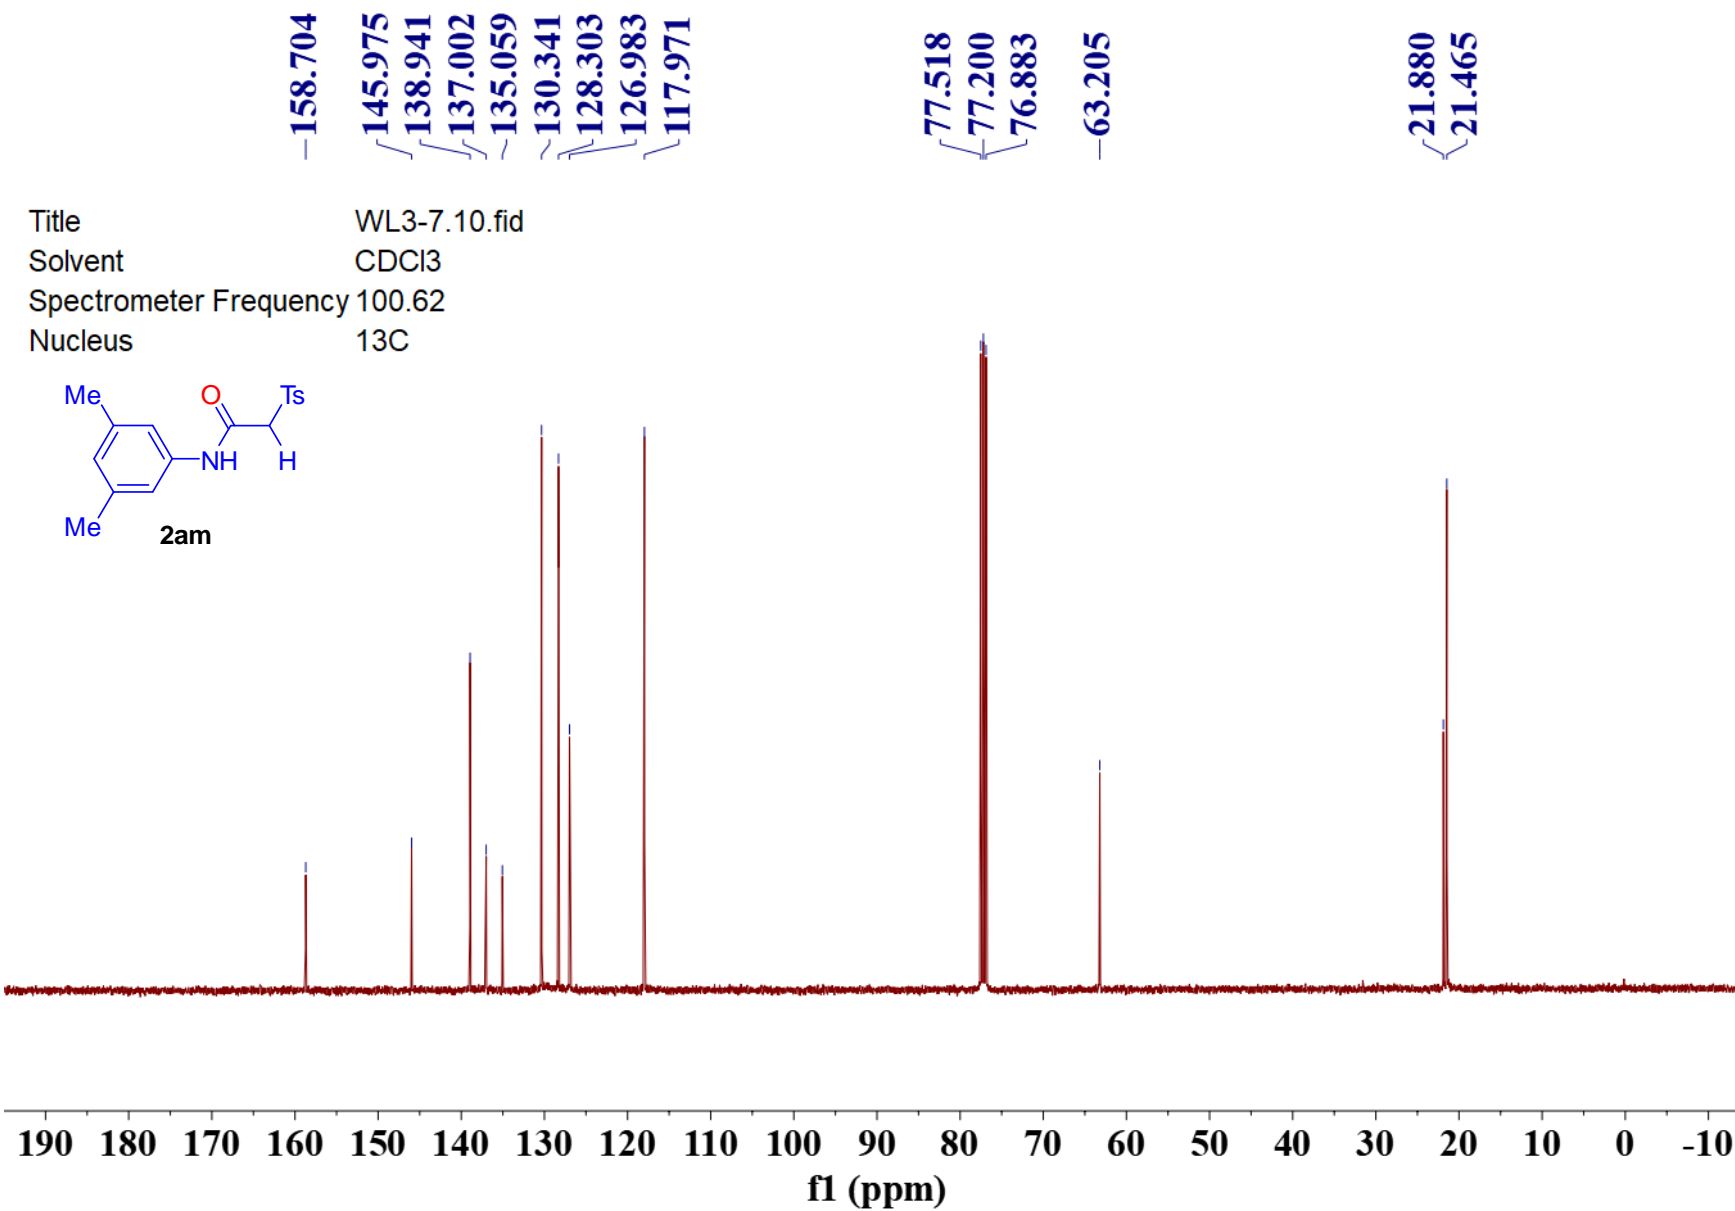

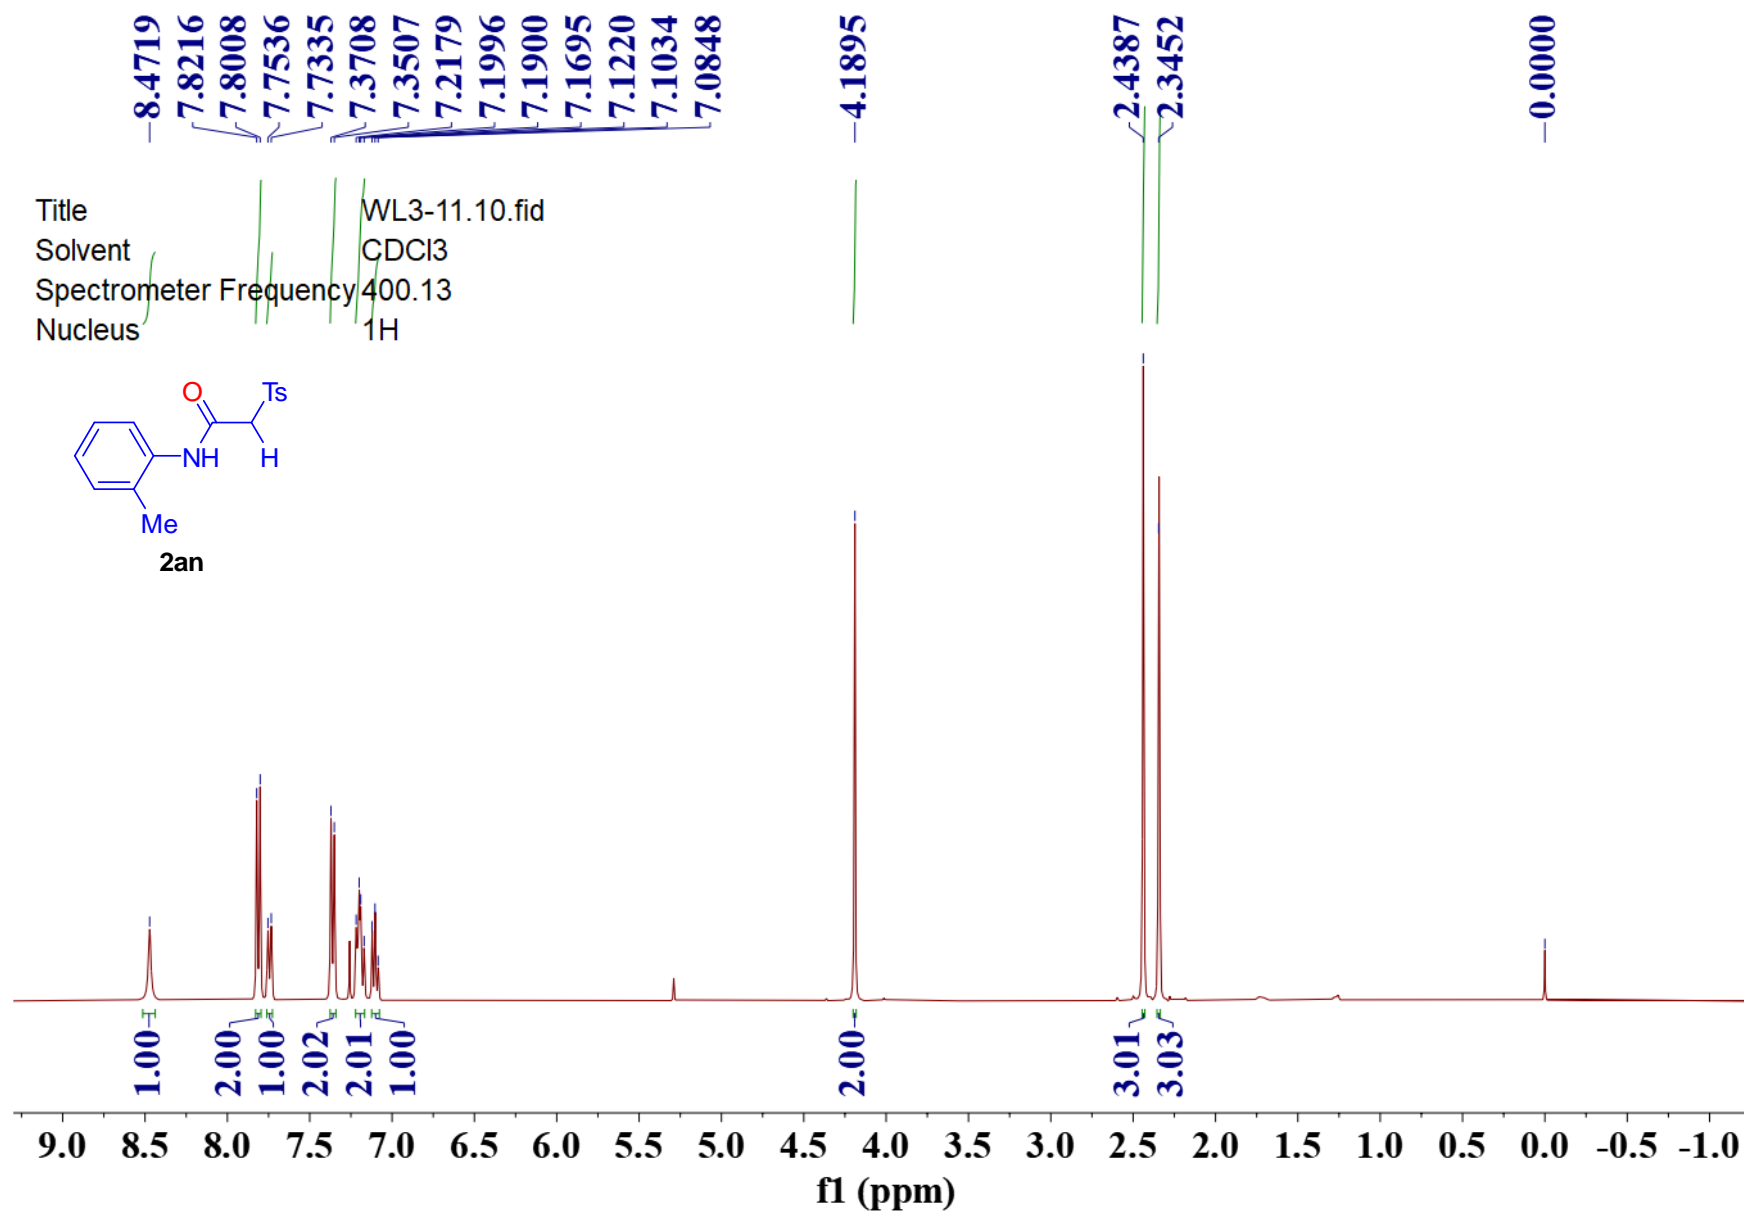

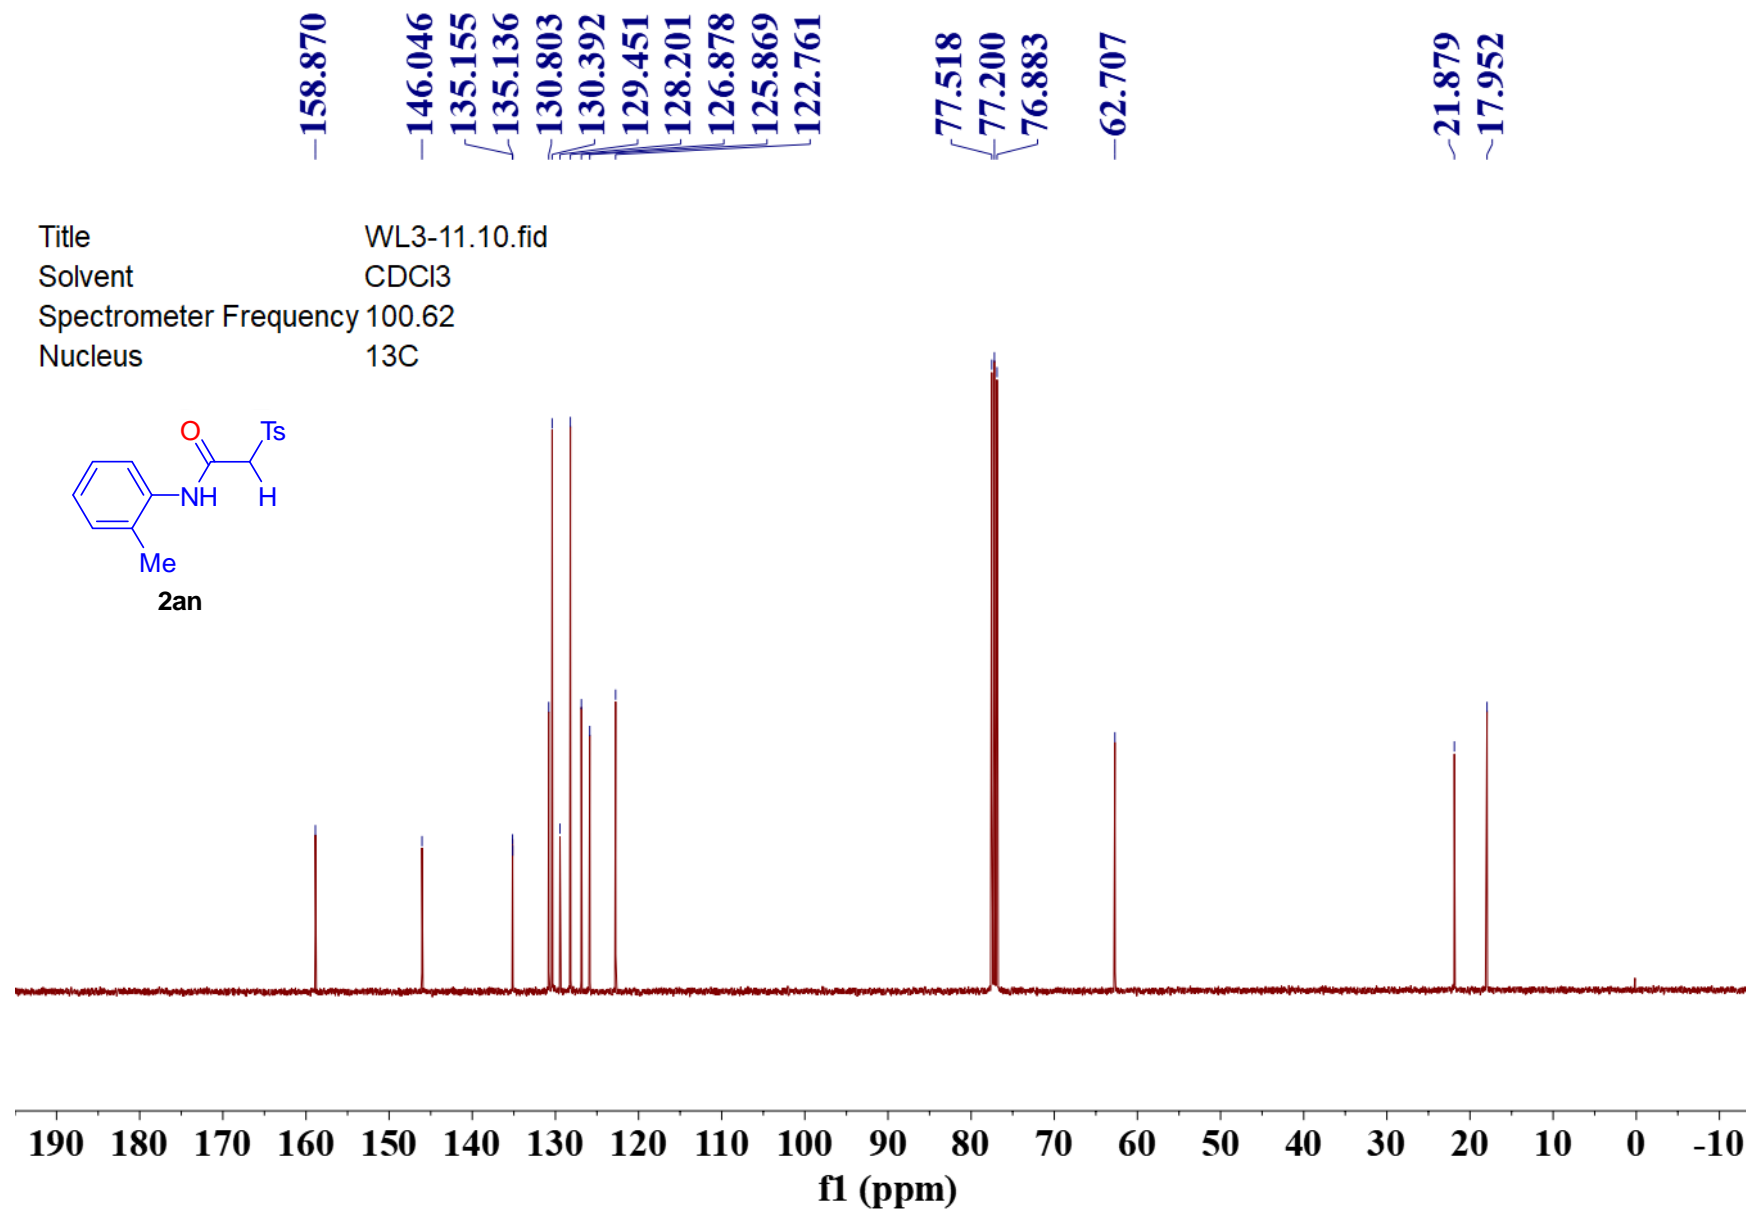

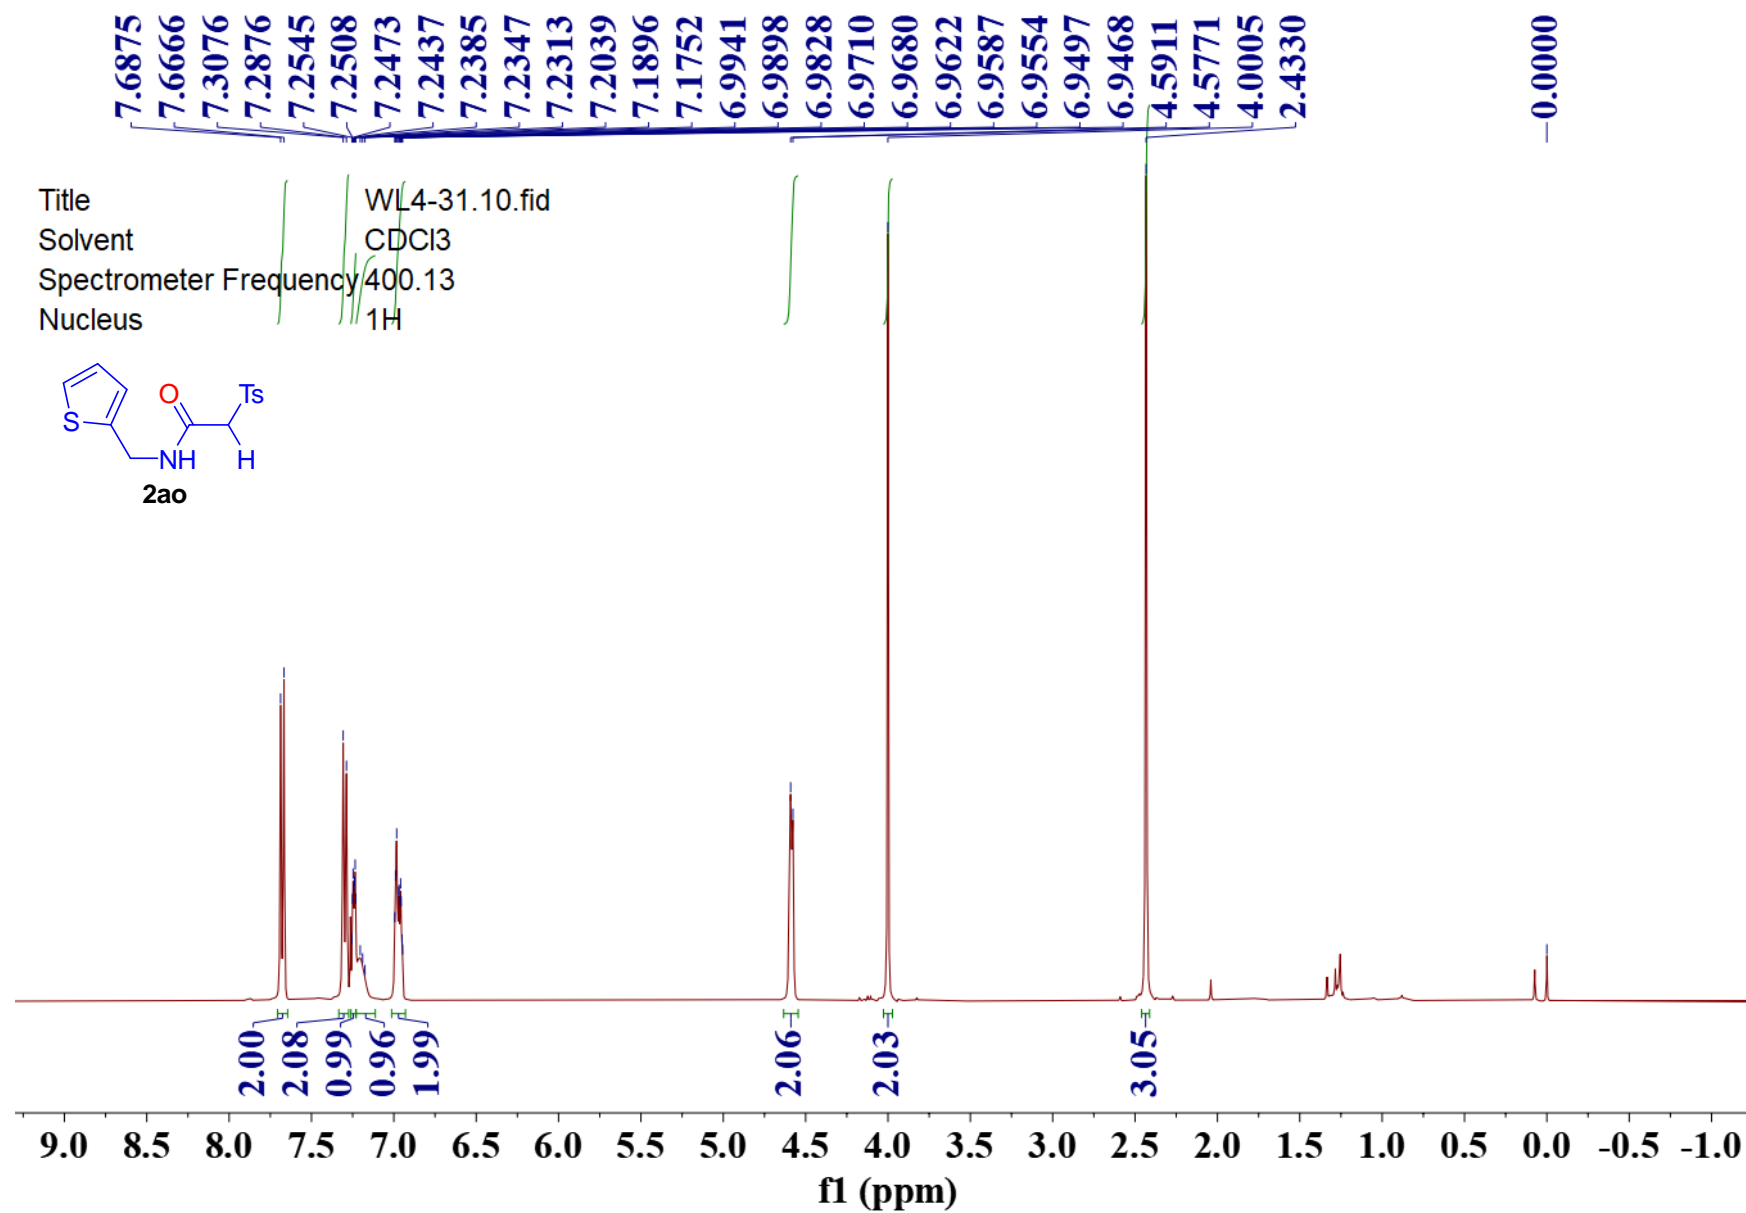



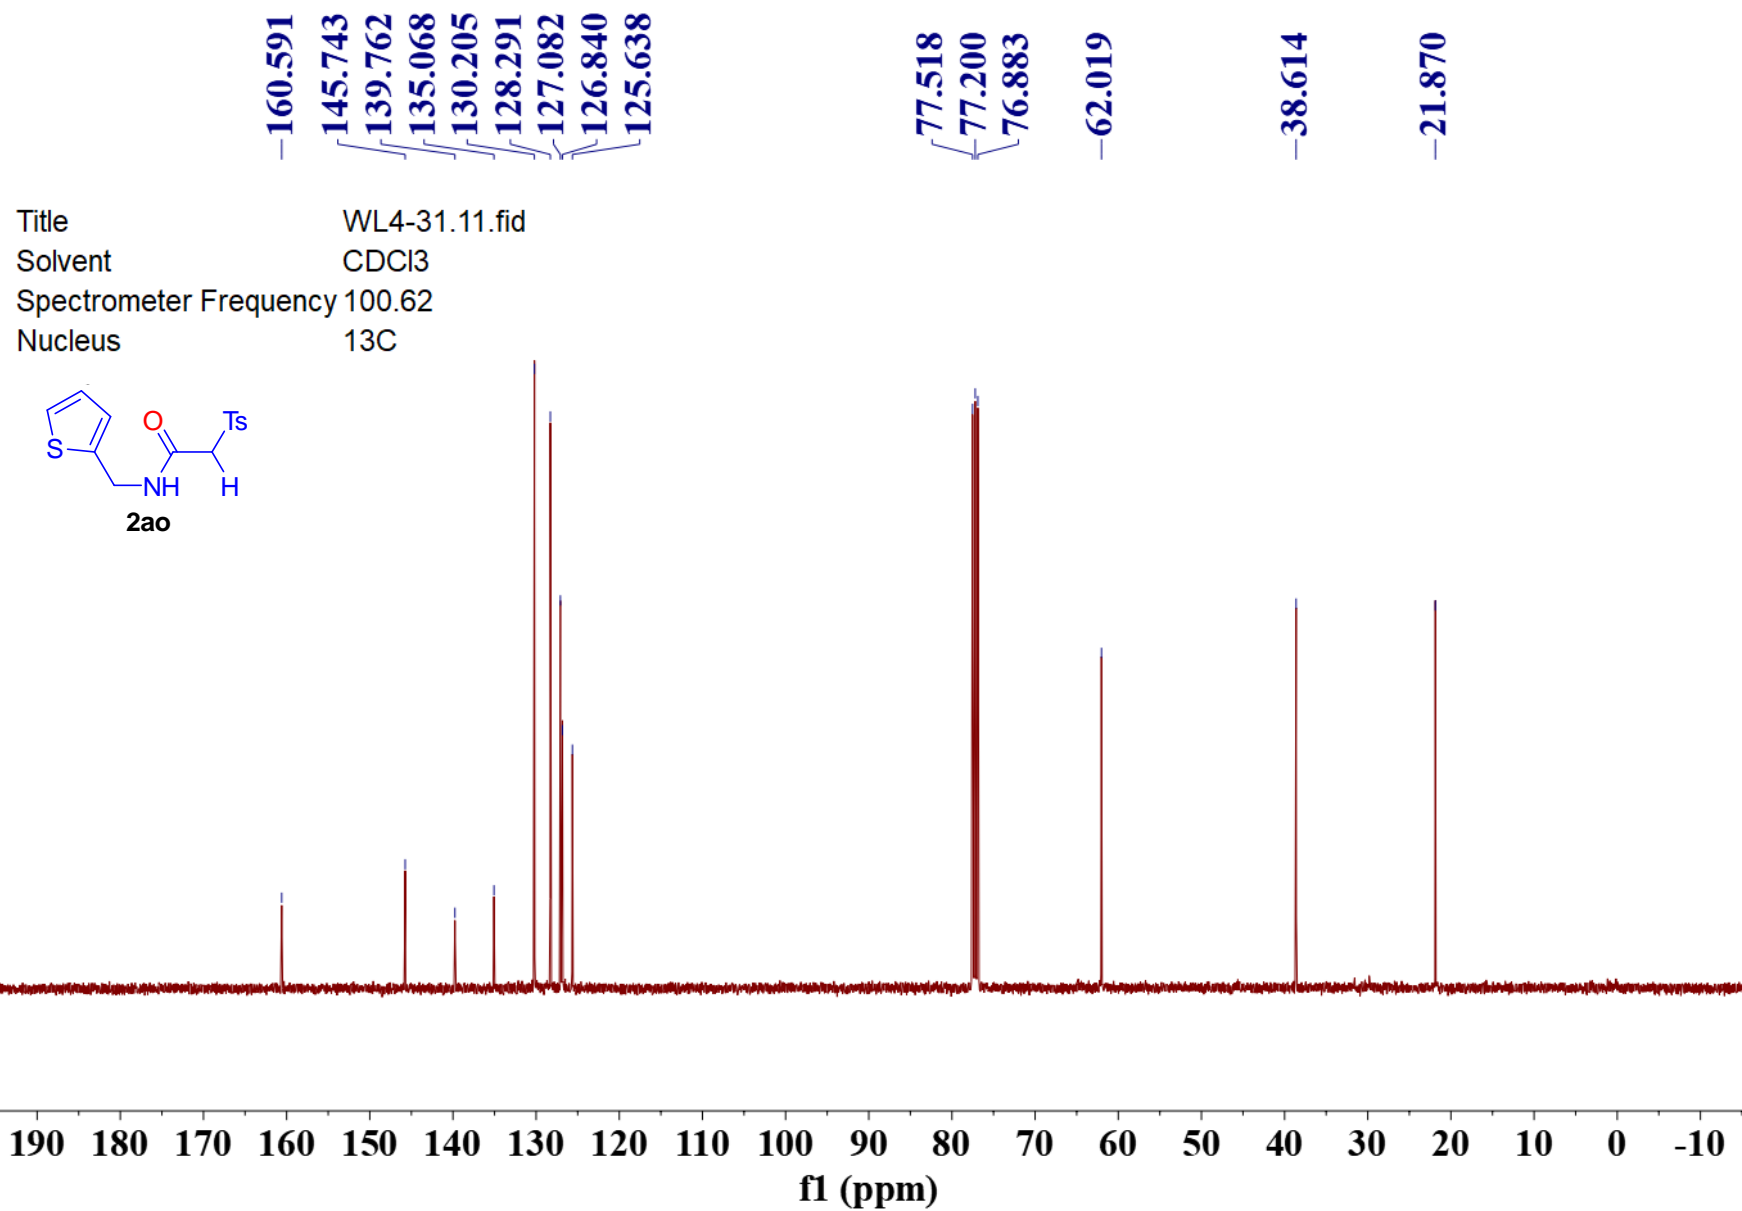

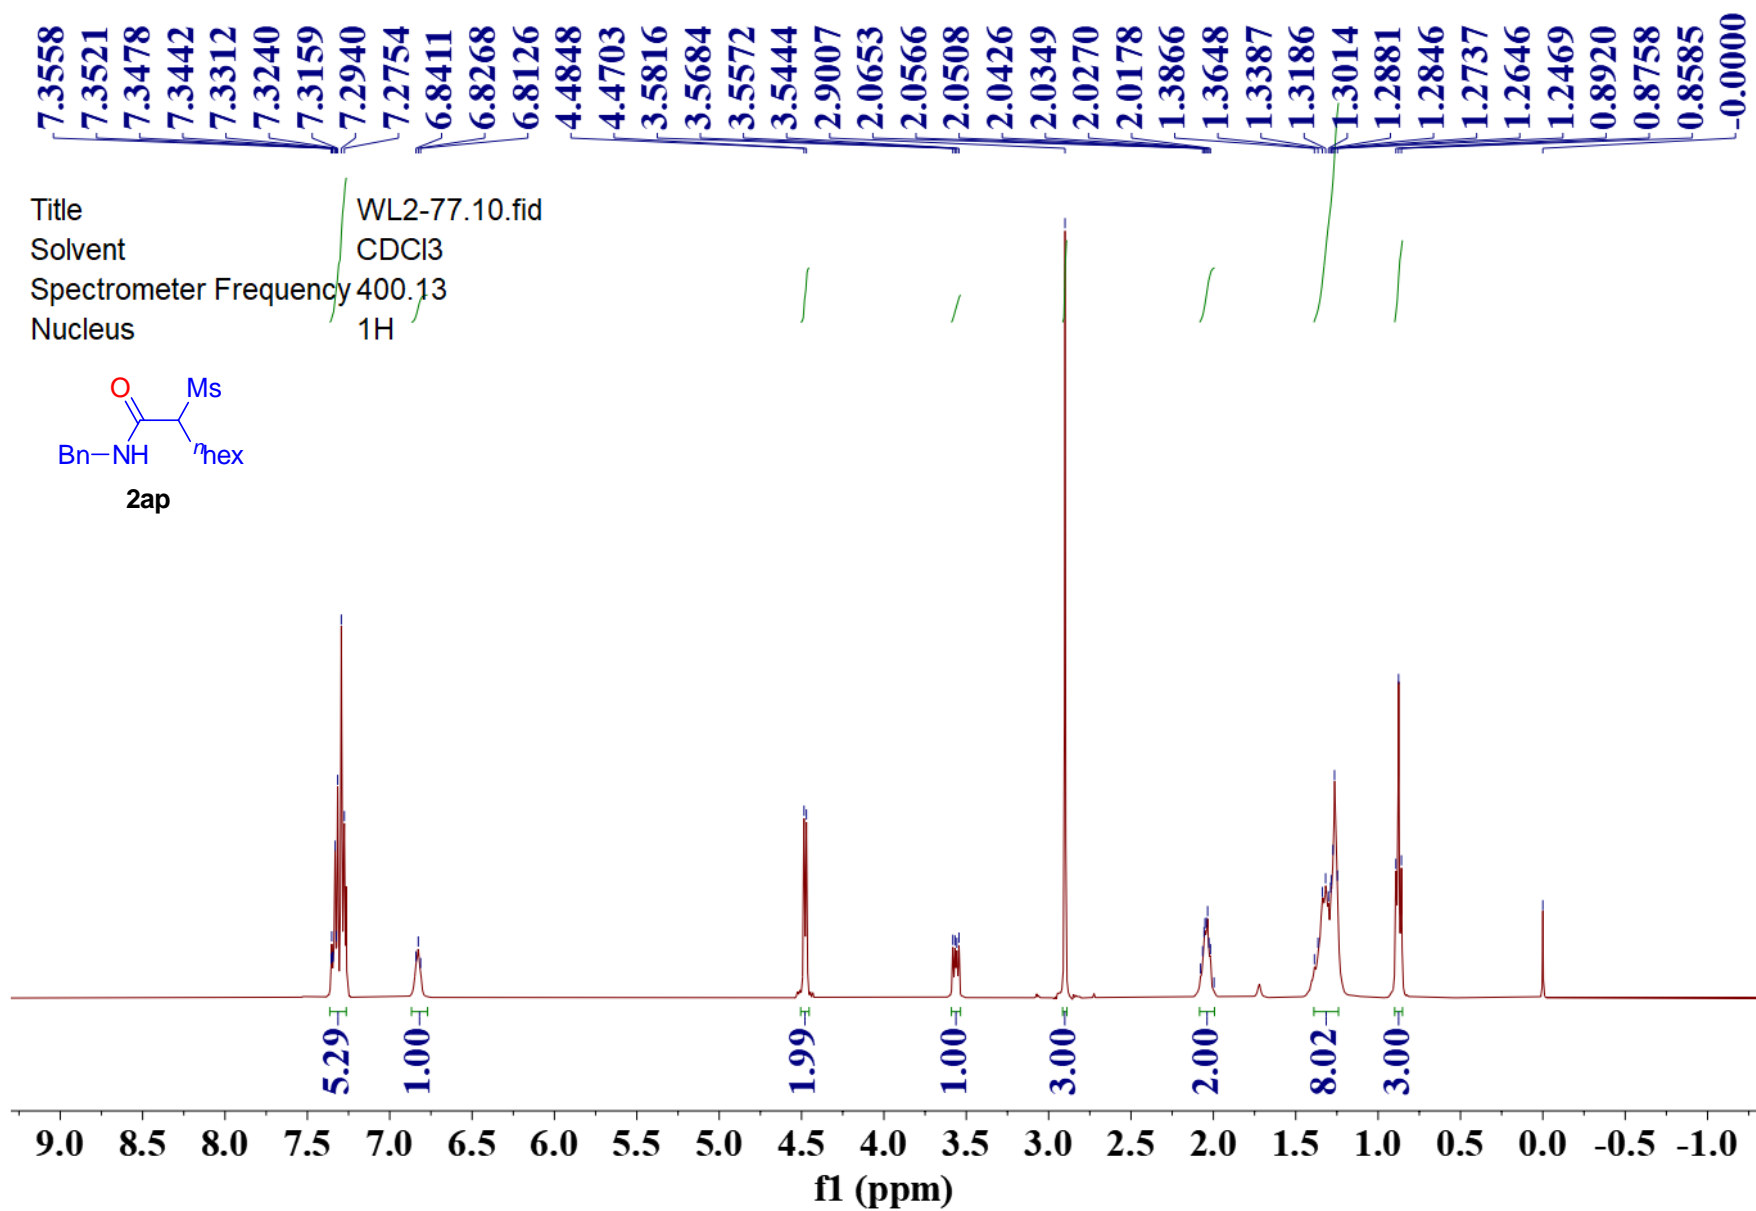

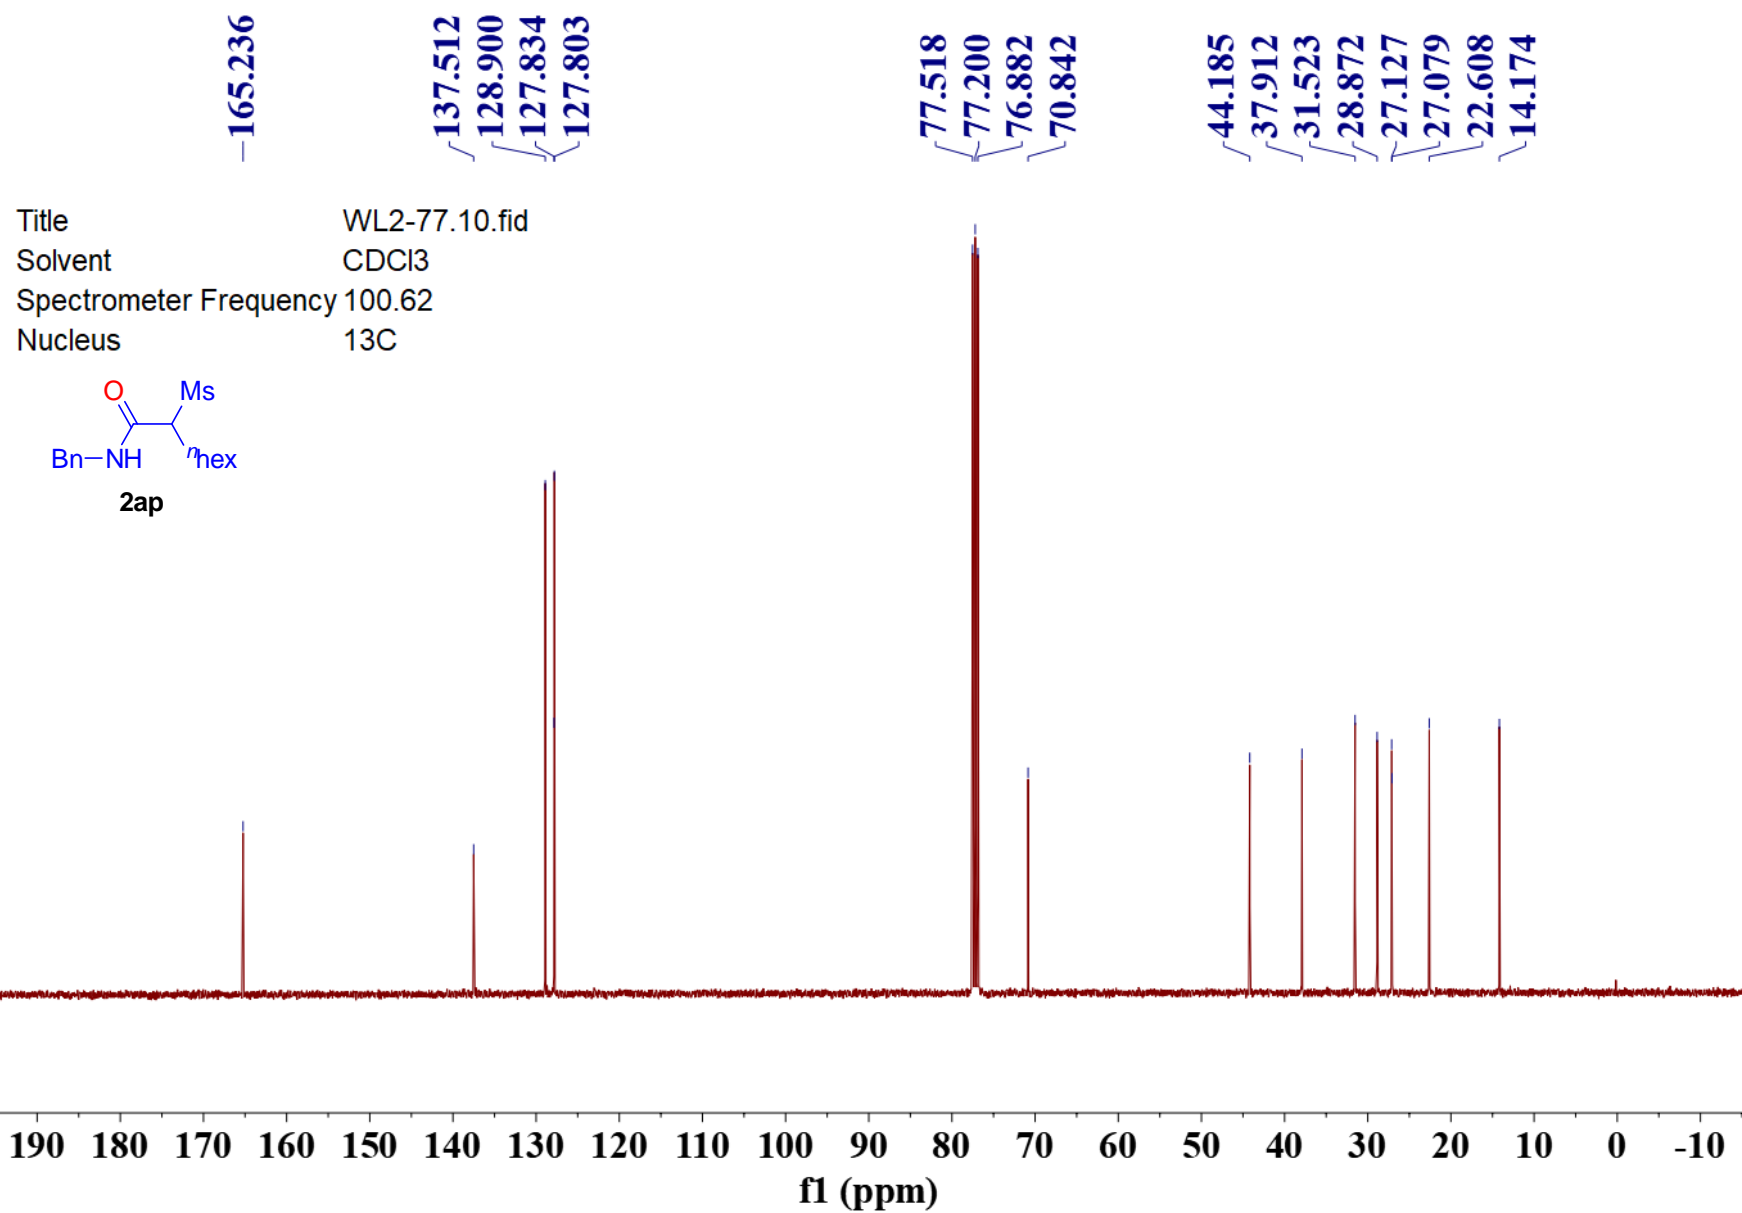

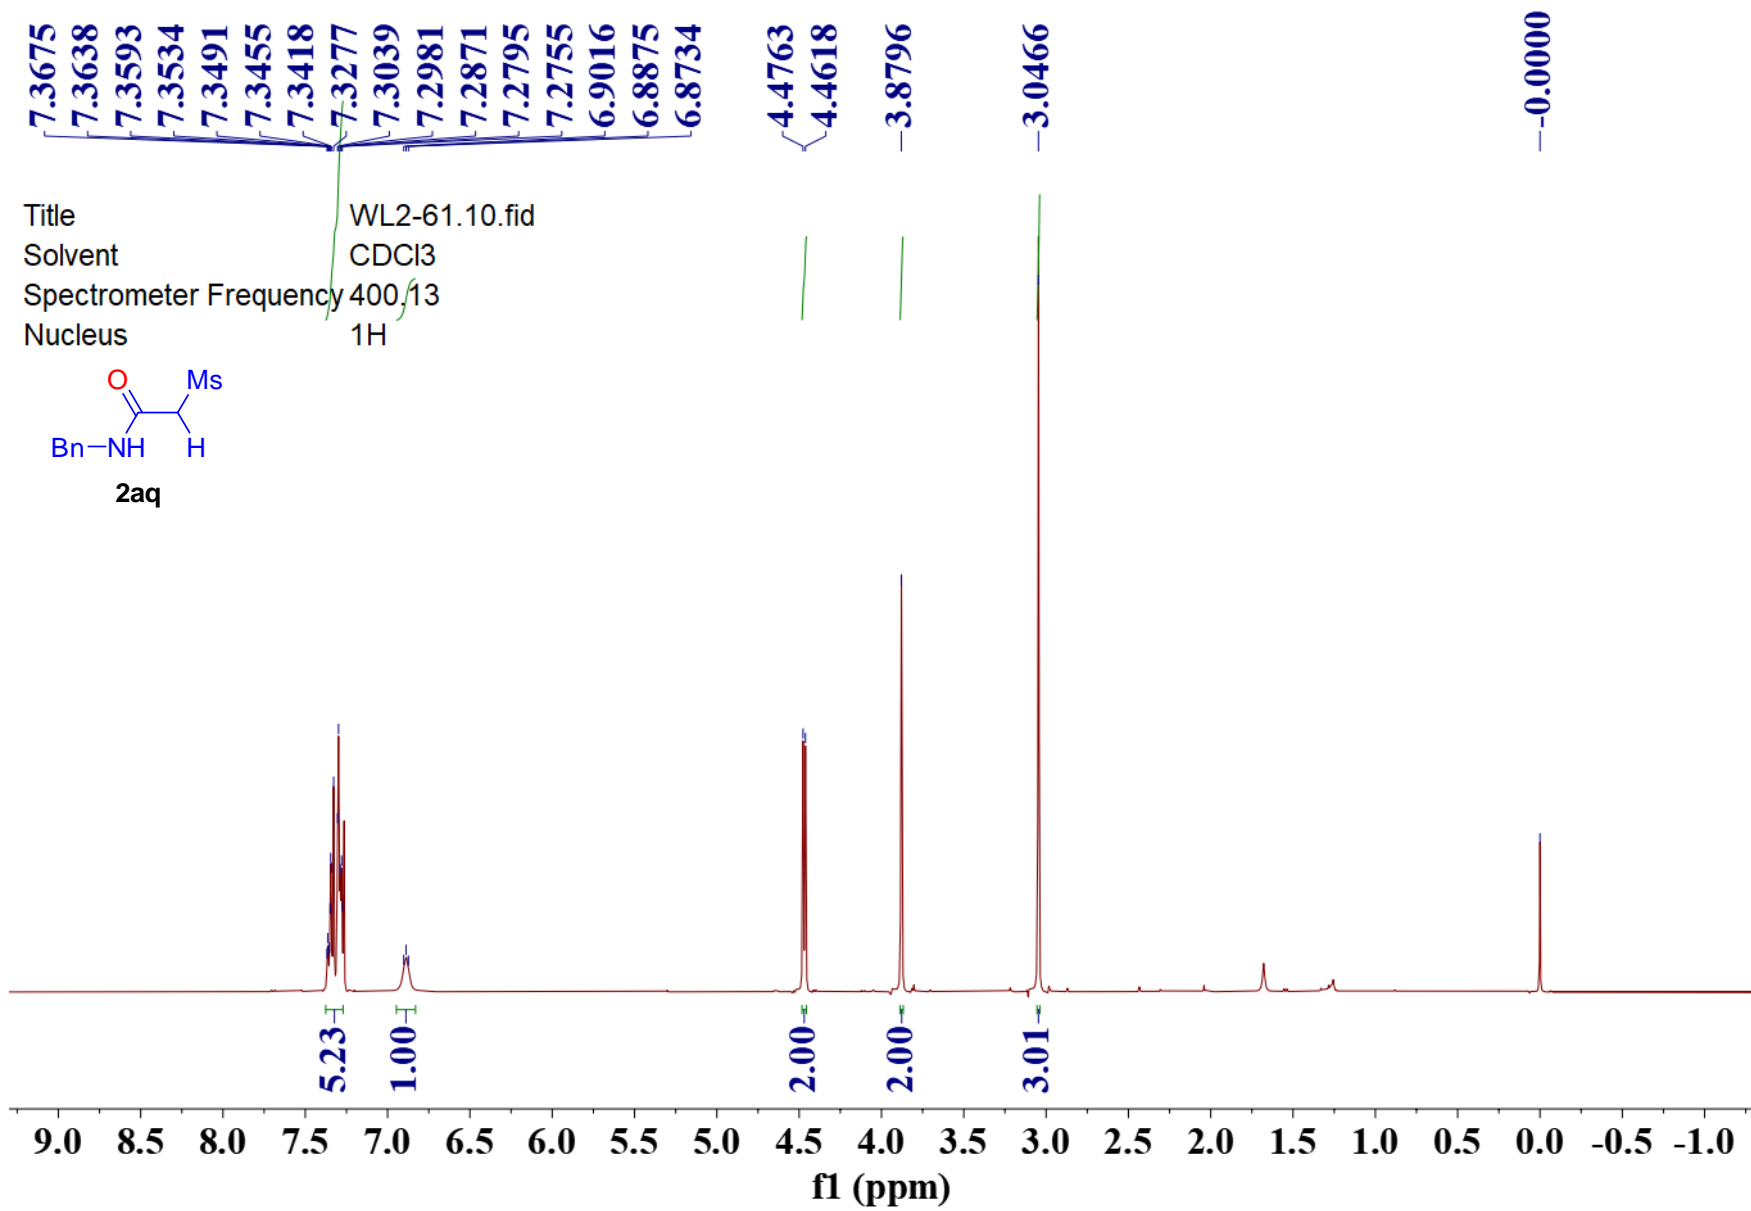

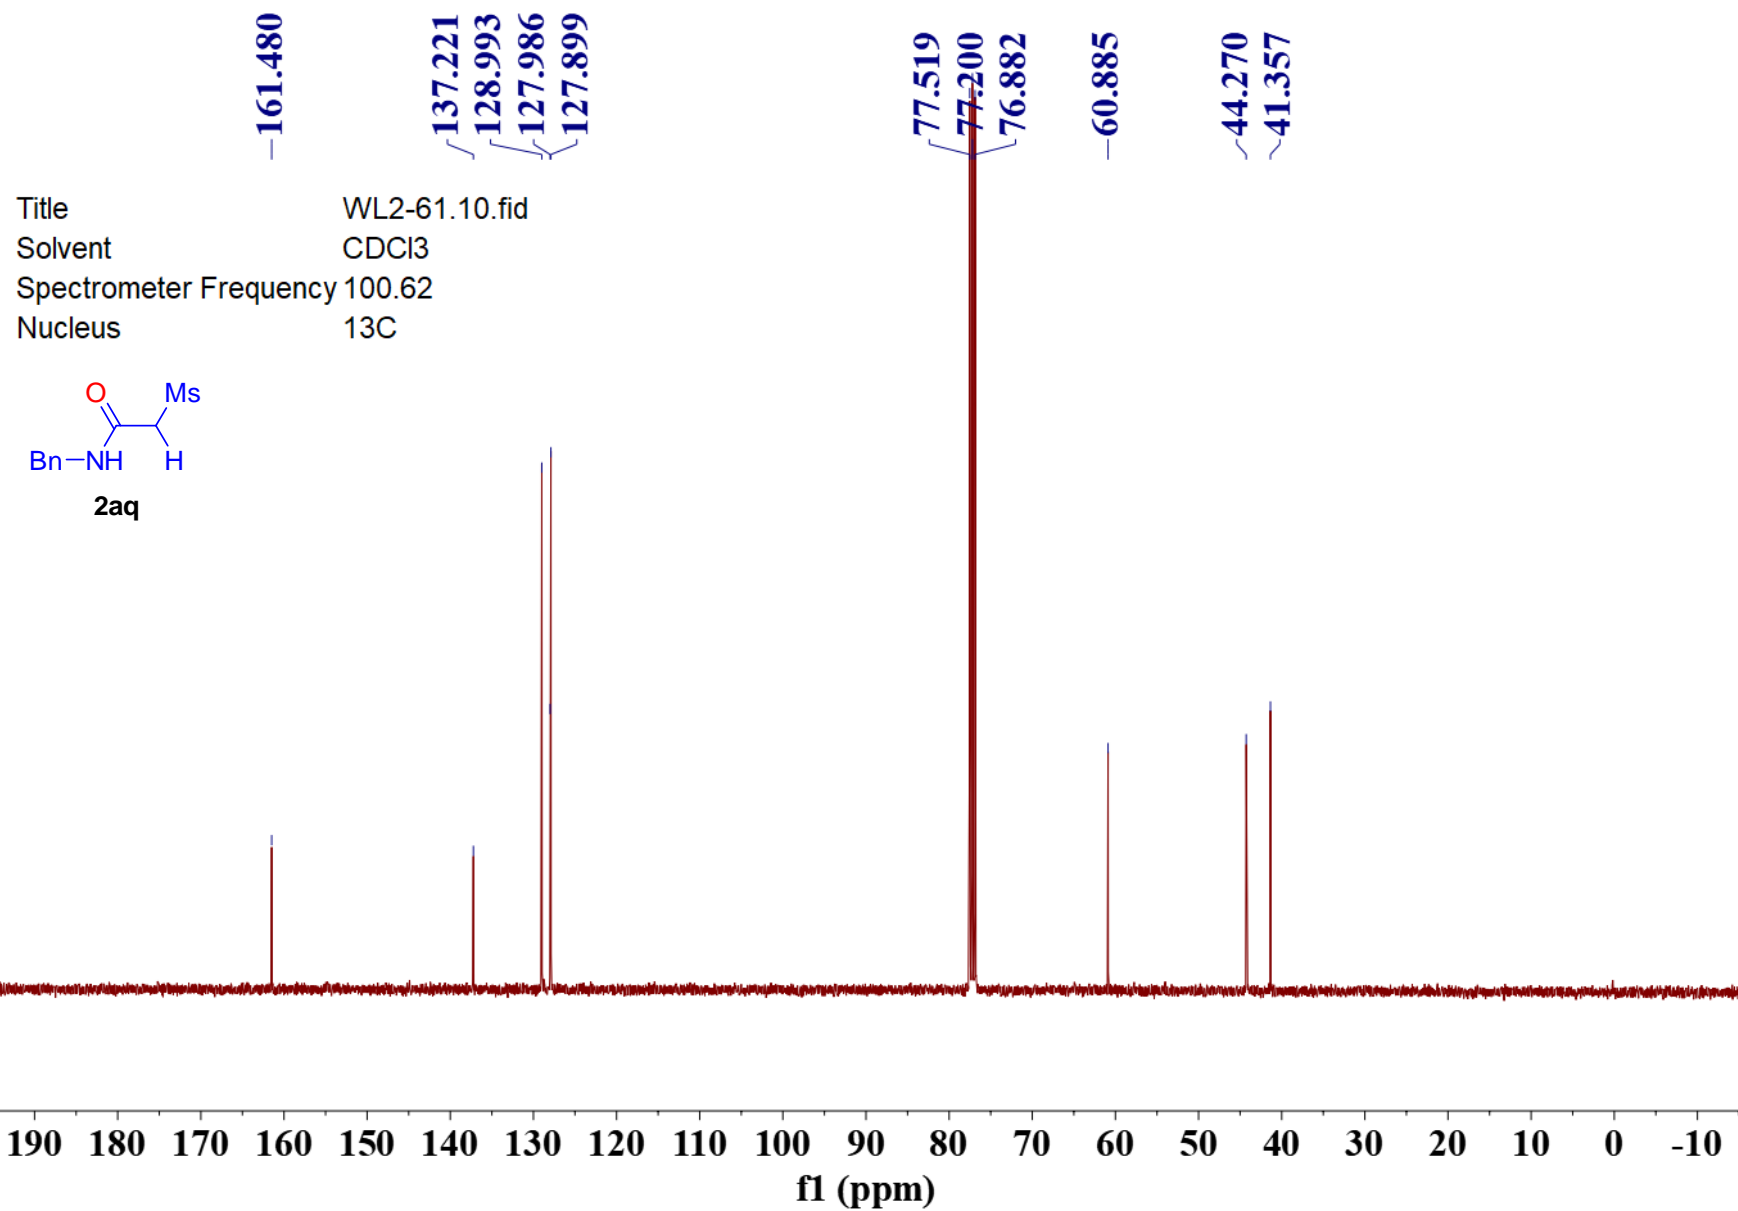

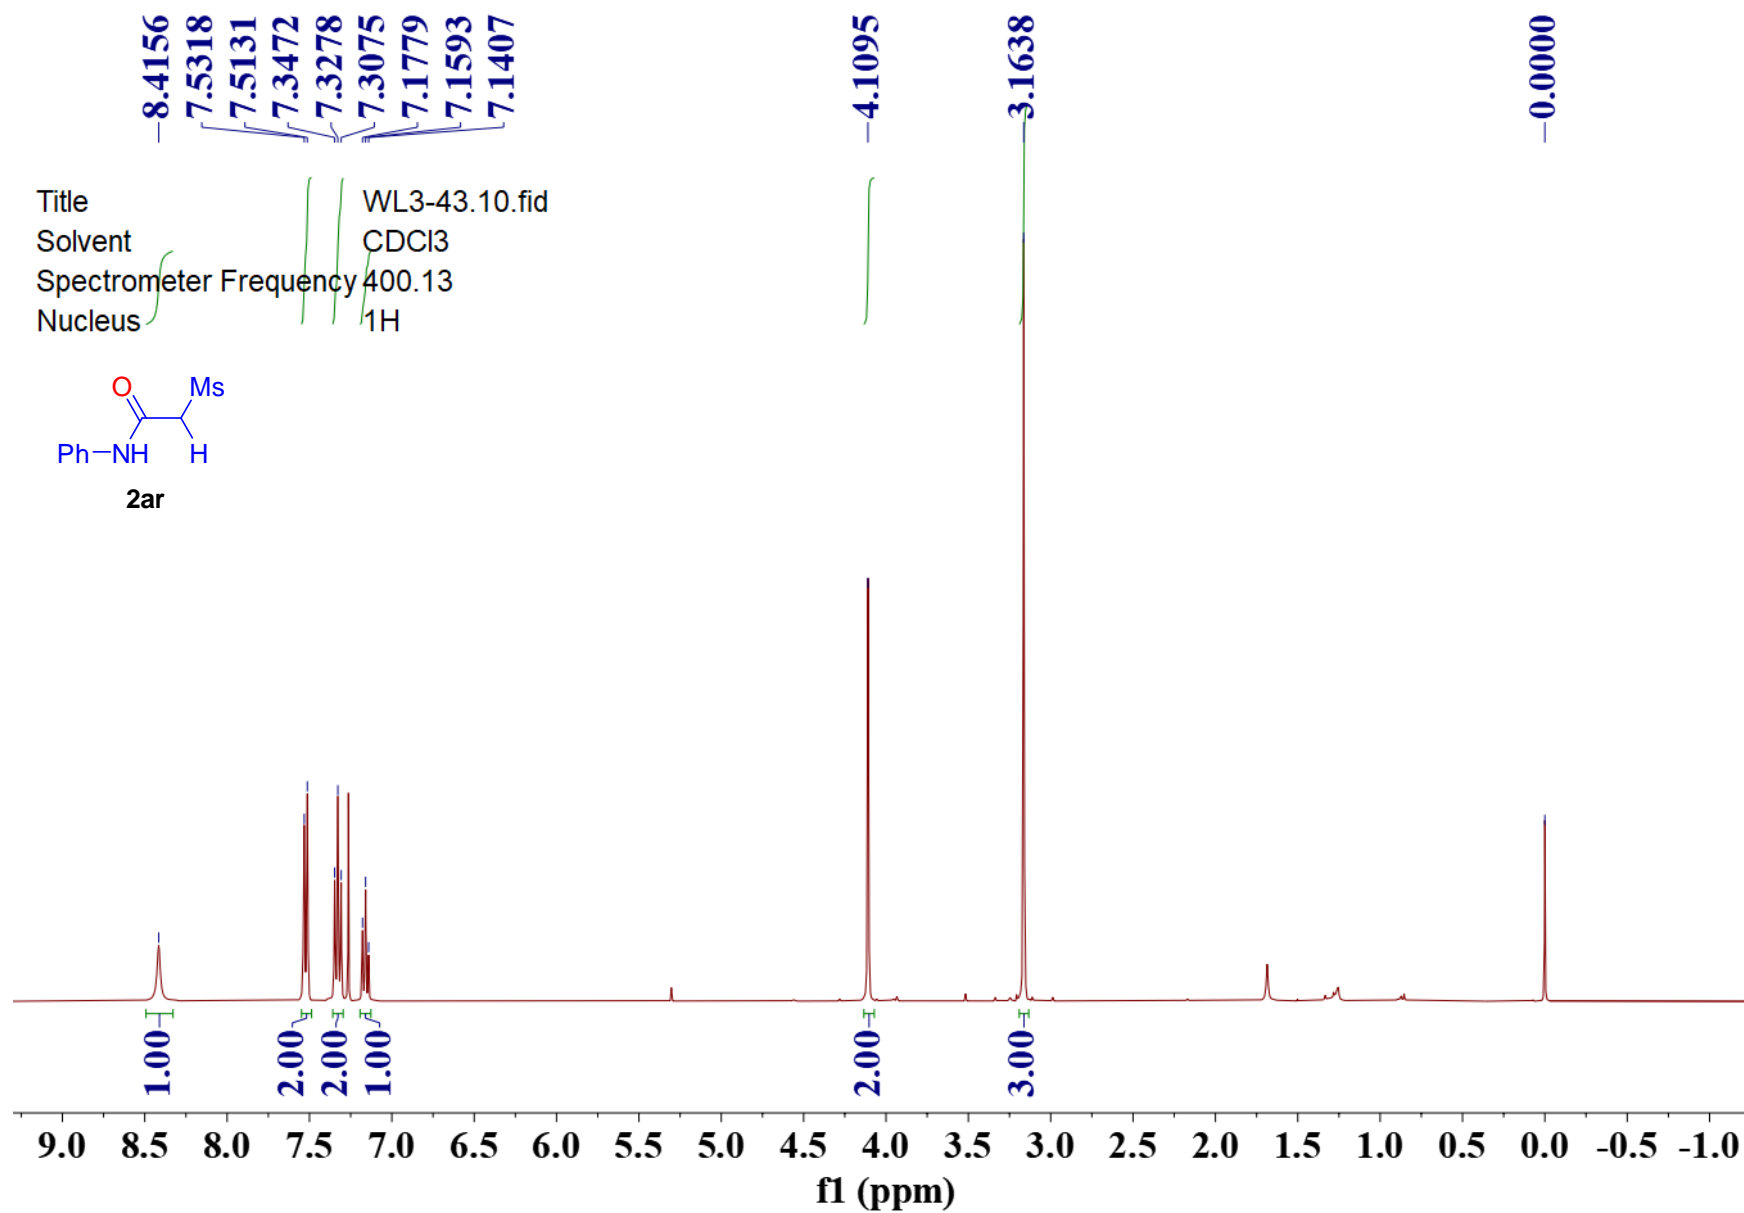

Title WL3-43.10.fid  
Solvent CDCl3  
Spectrometer Frequency 100.62  
Nucleus 13C

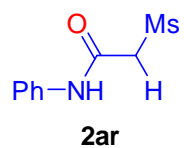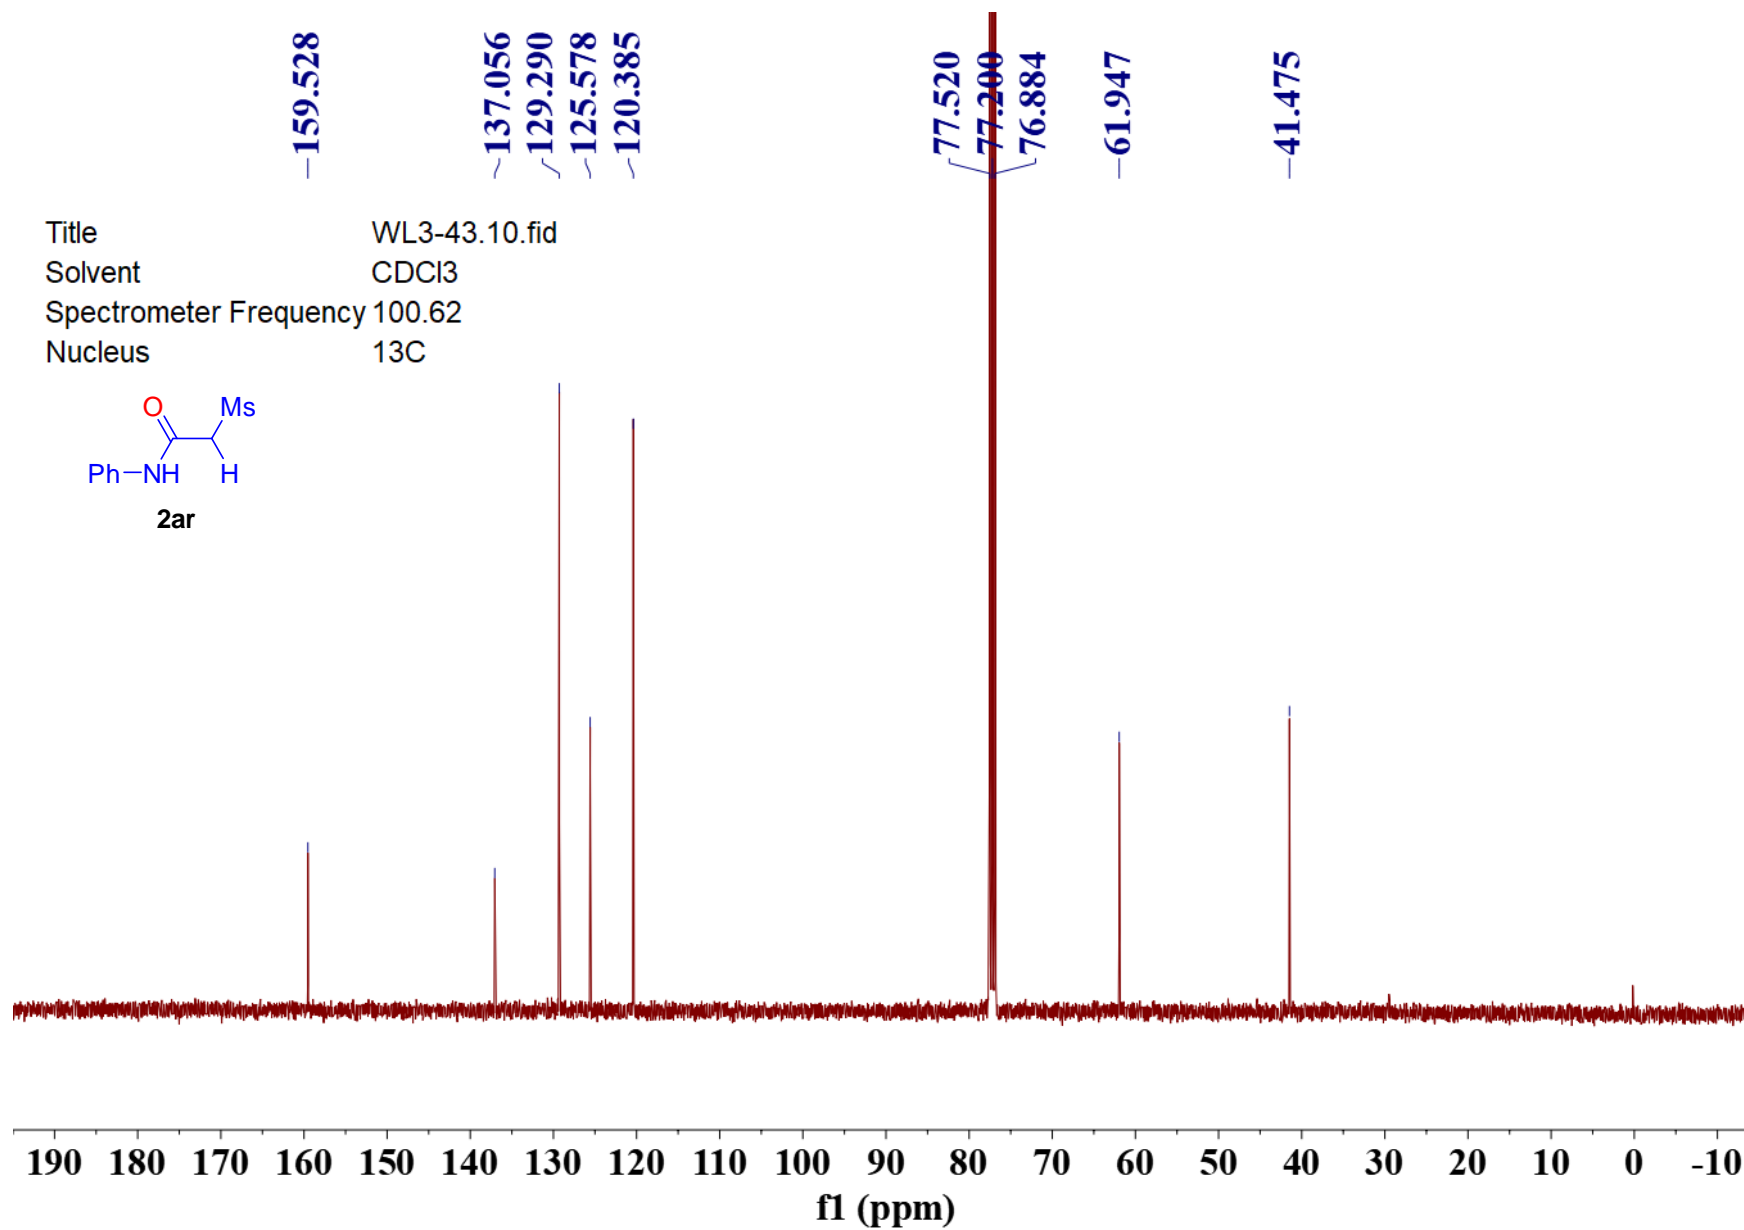

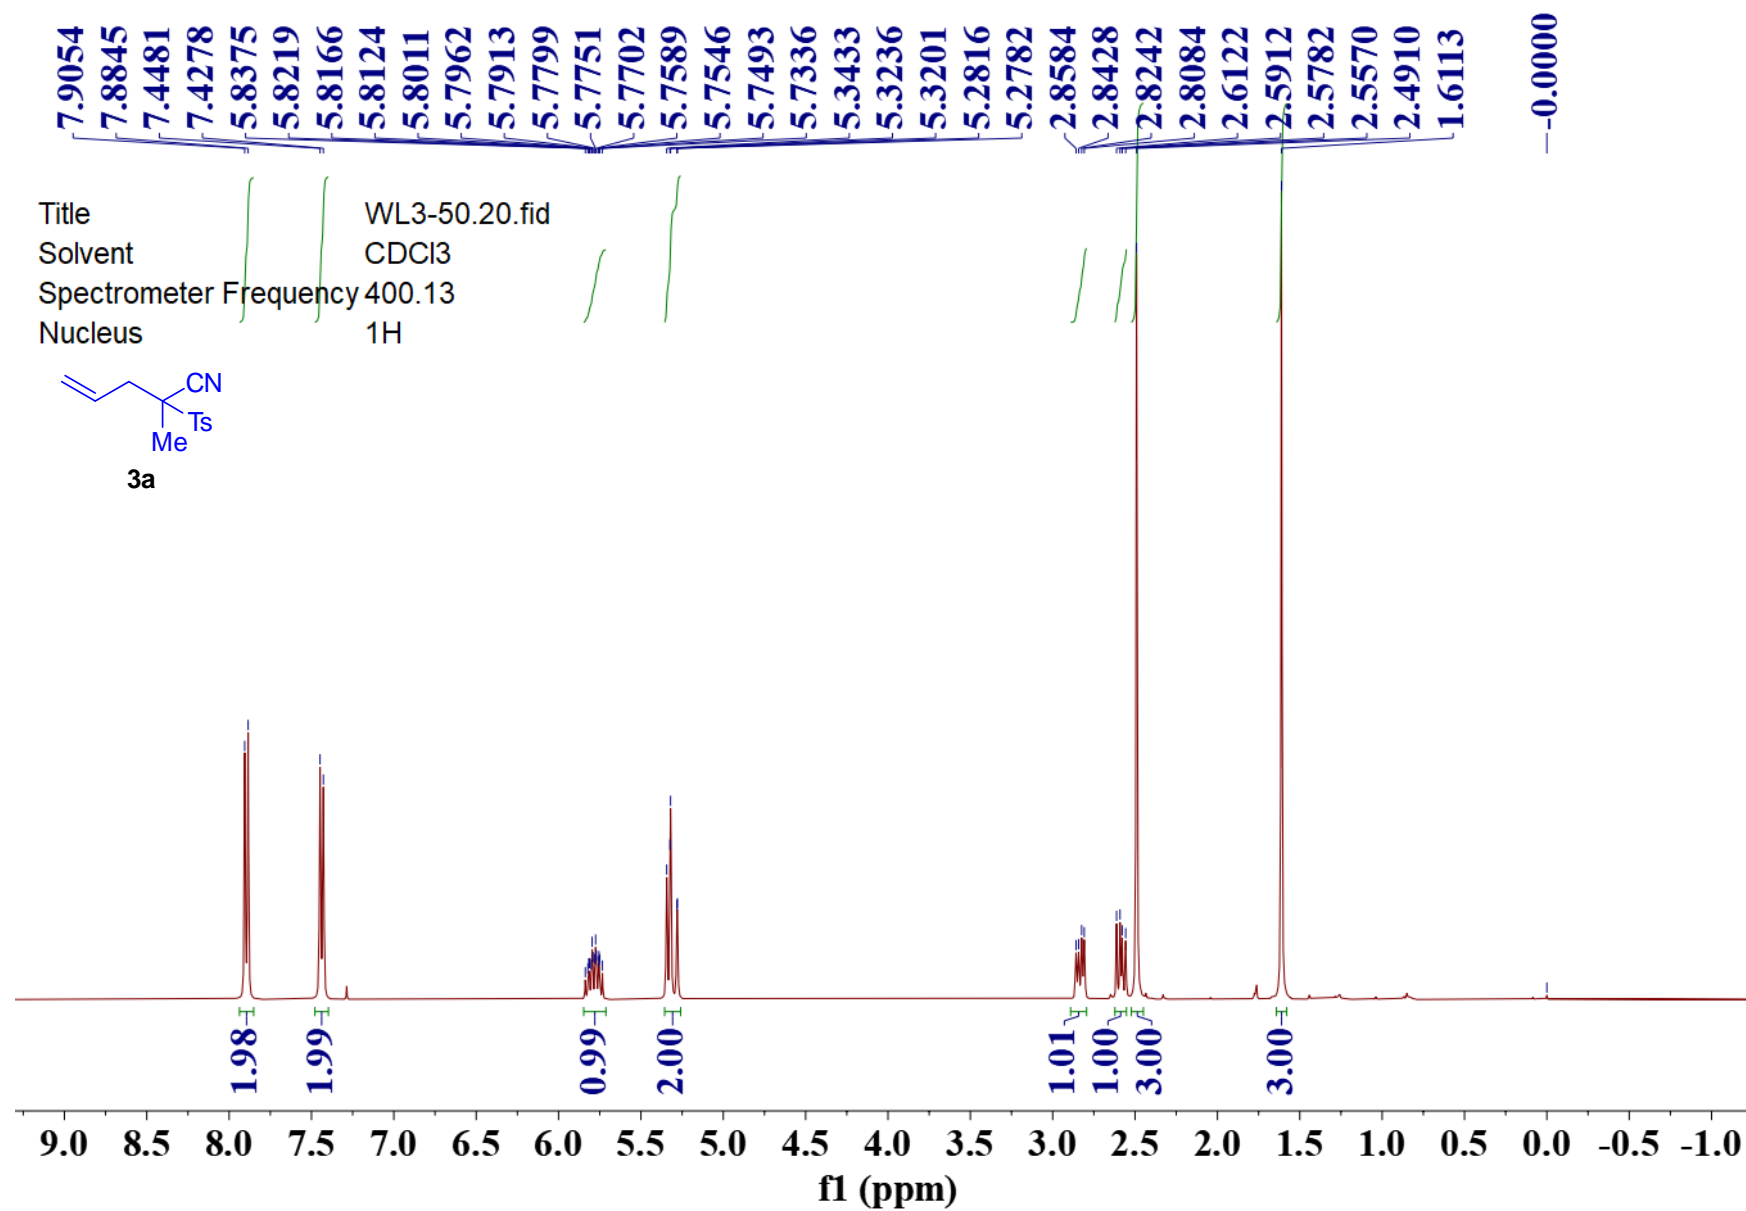



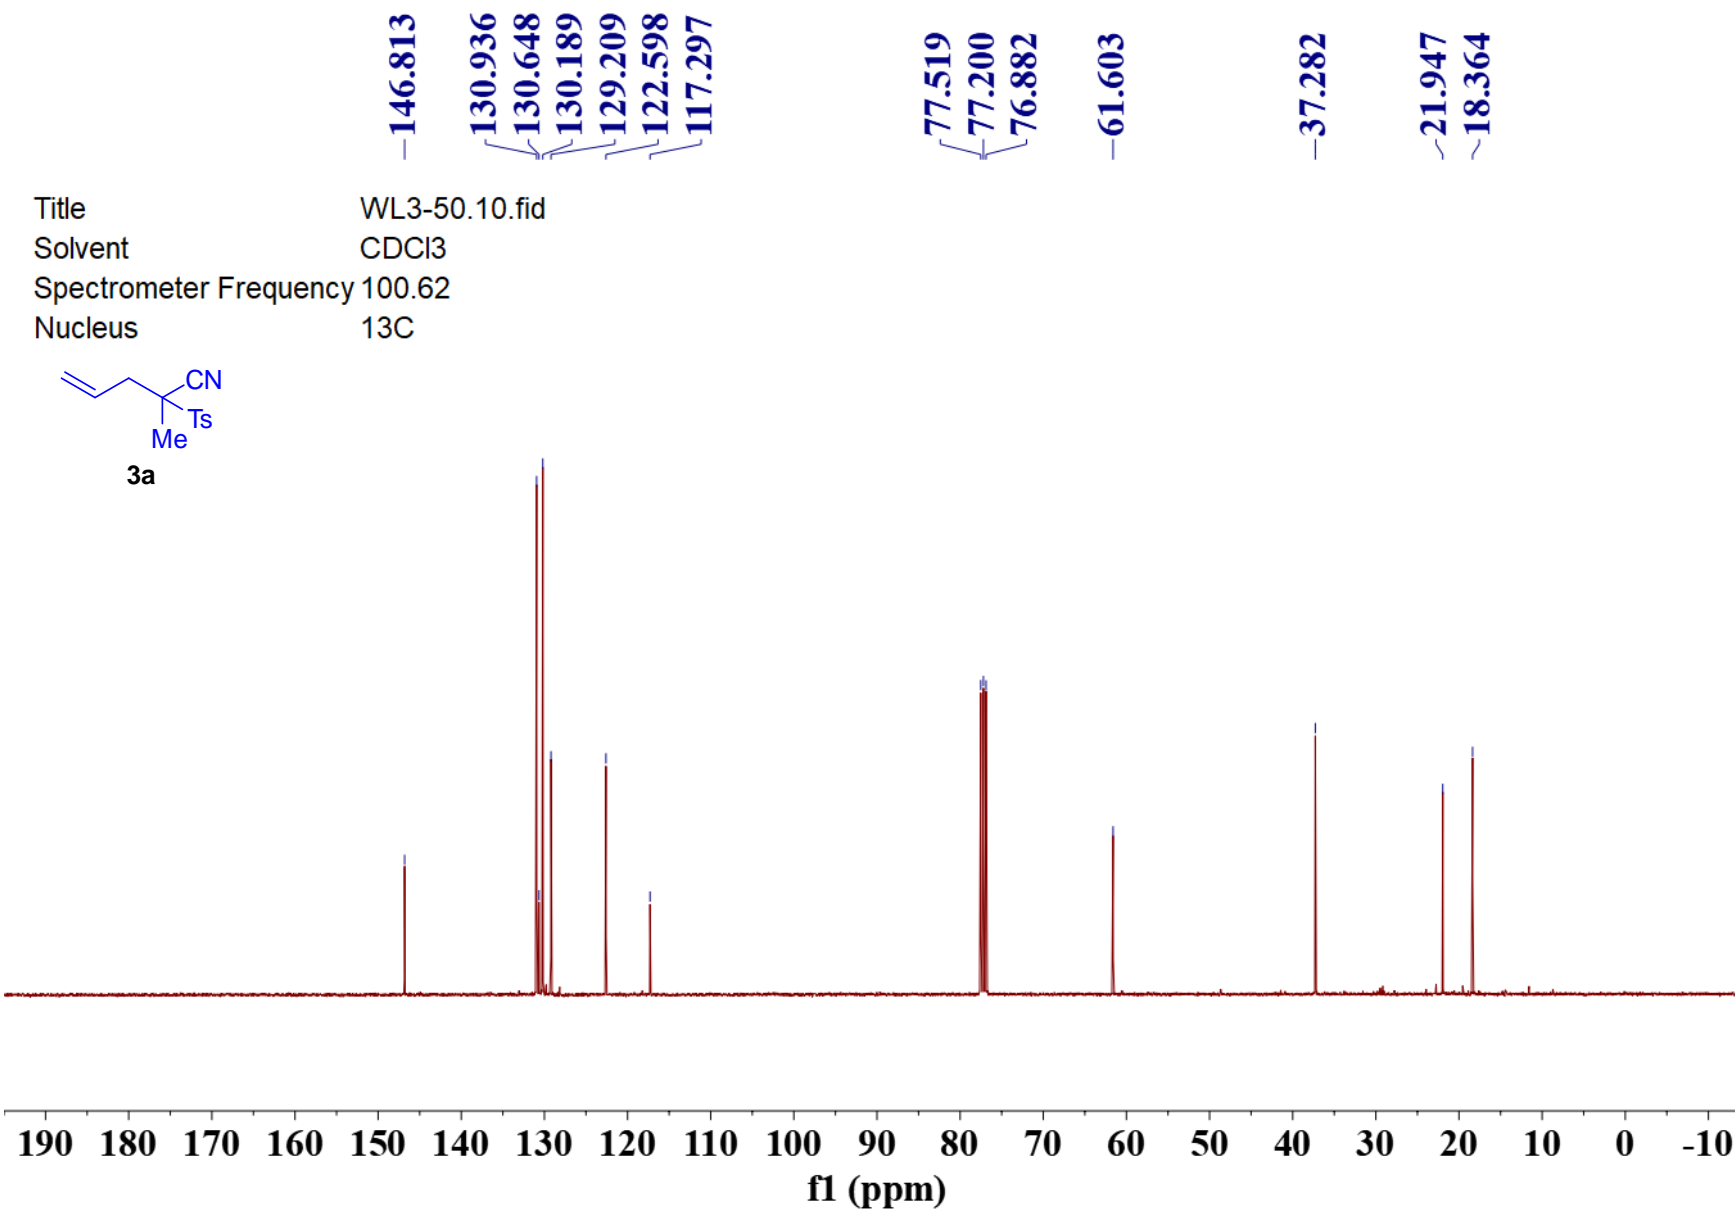

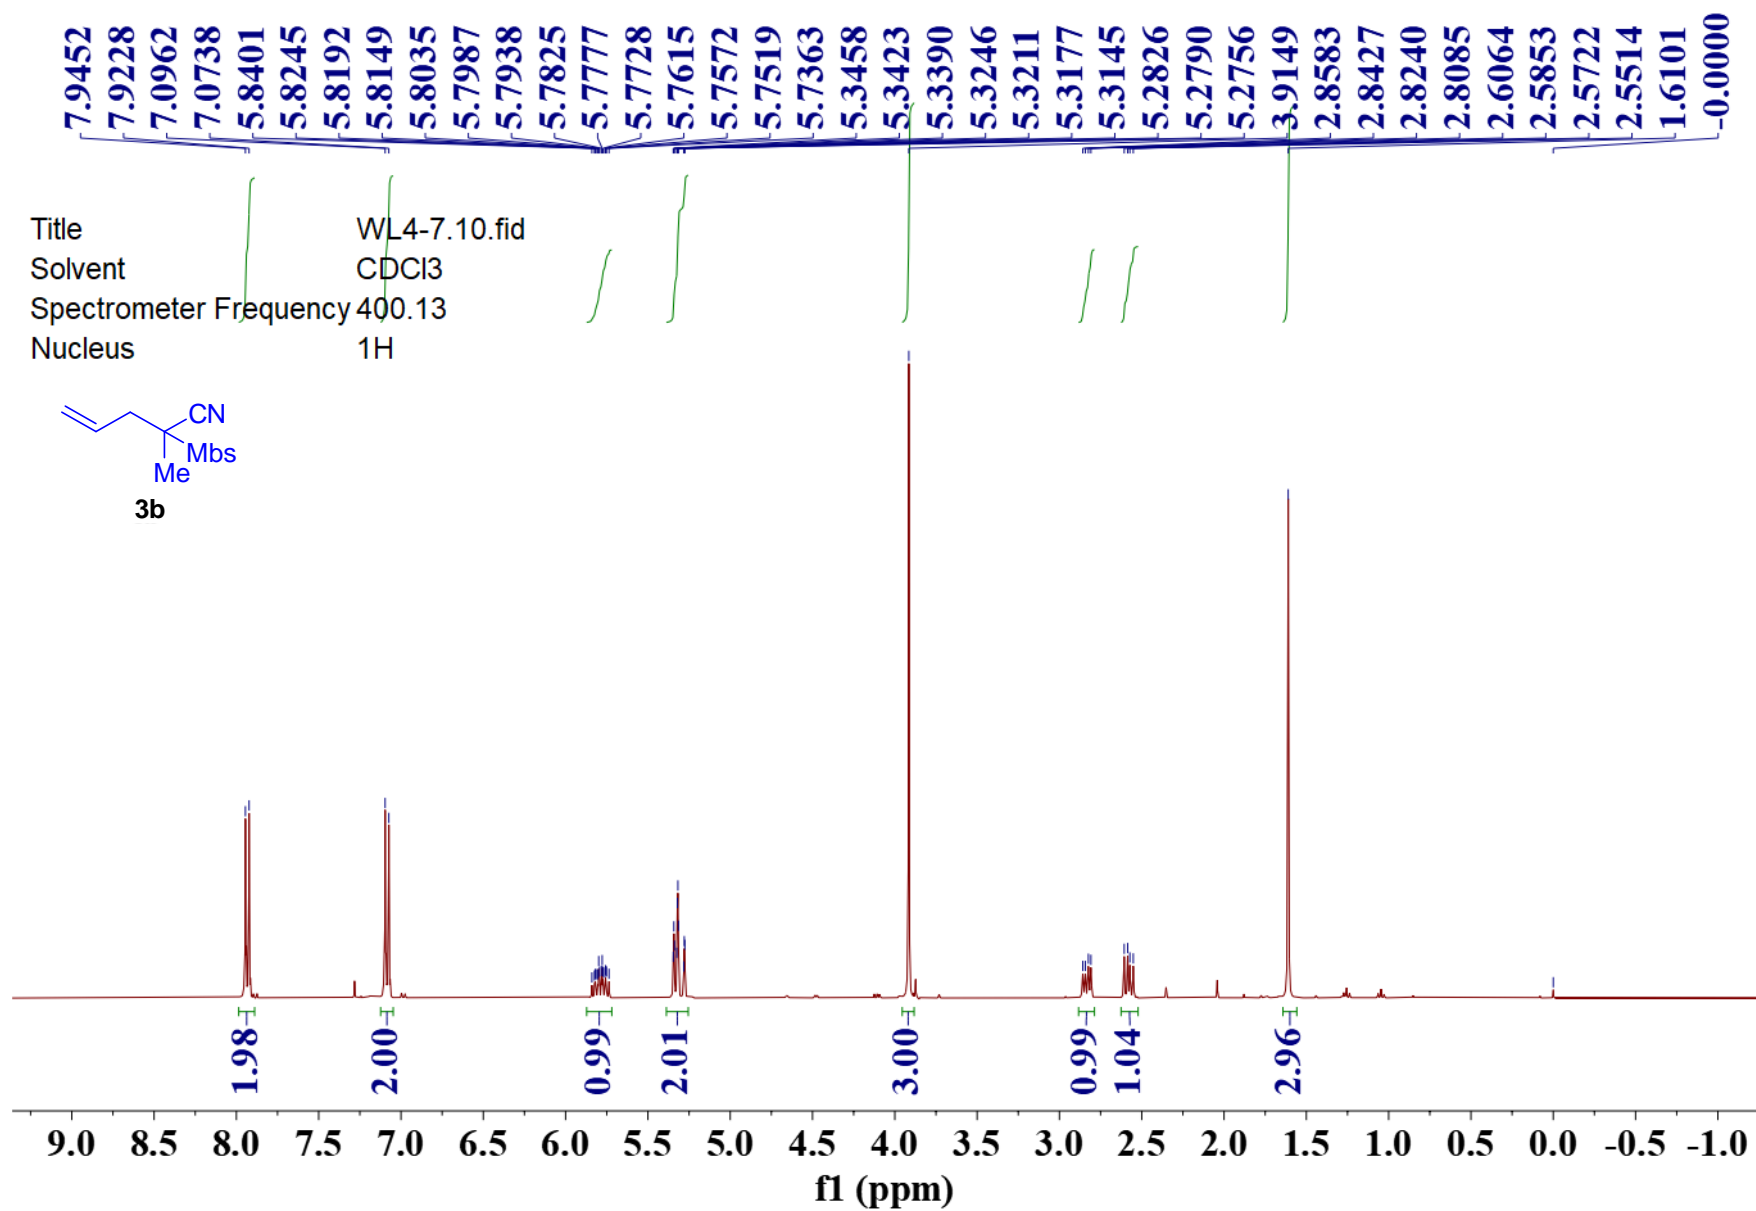

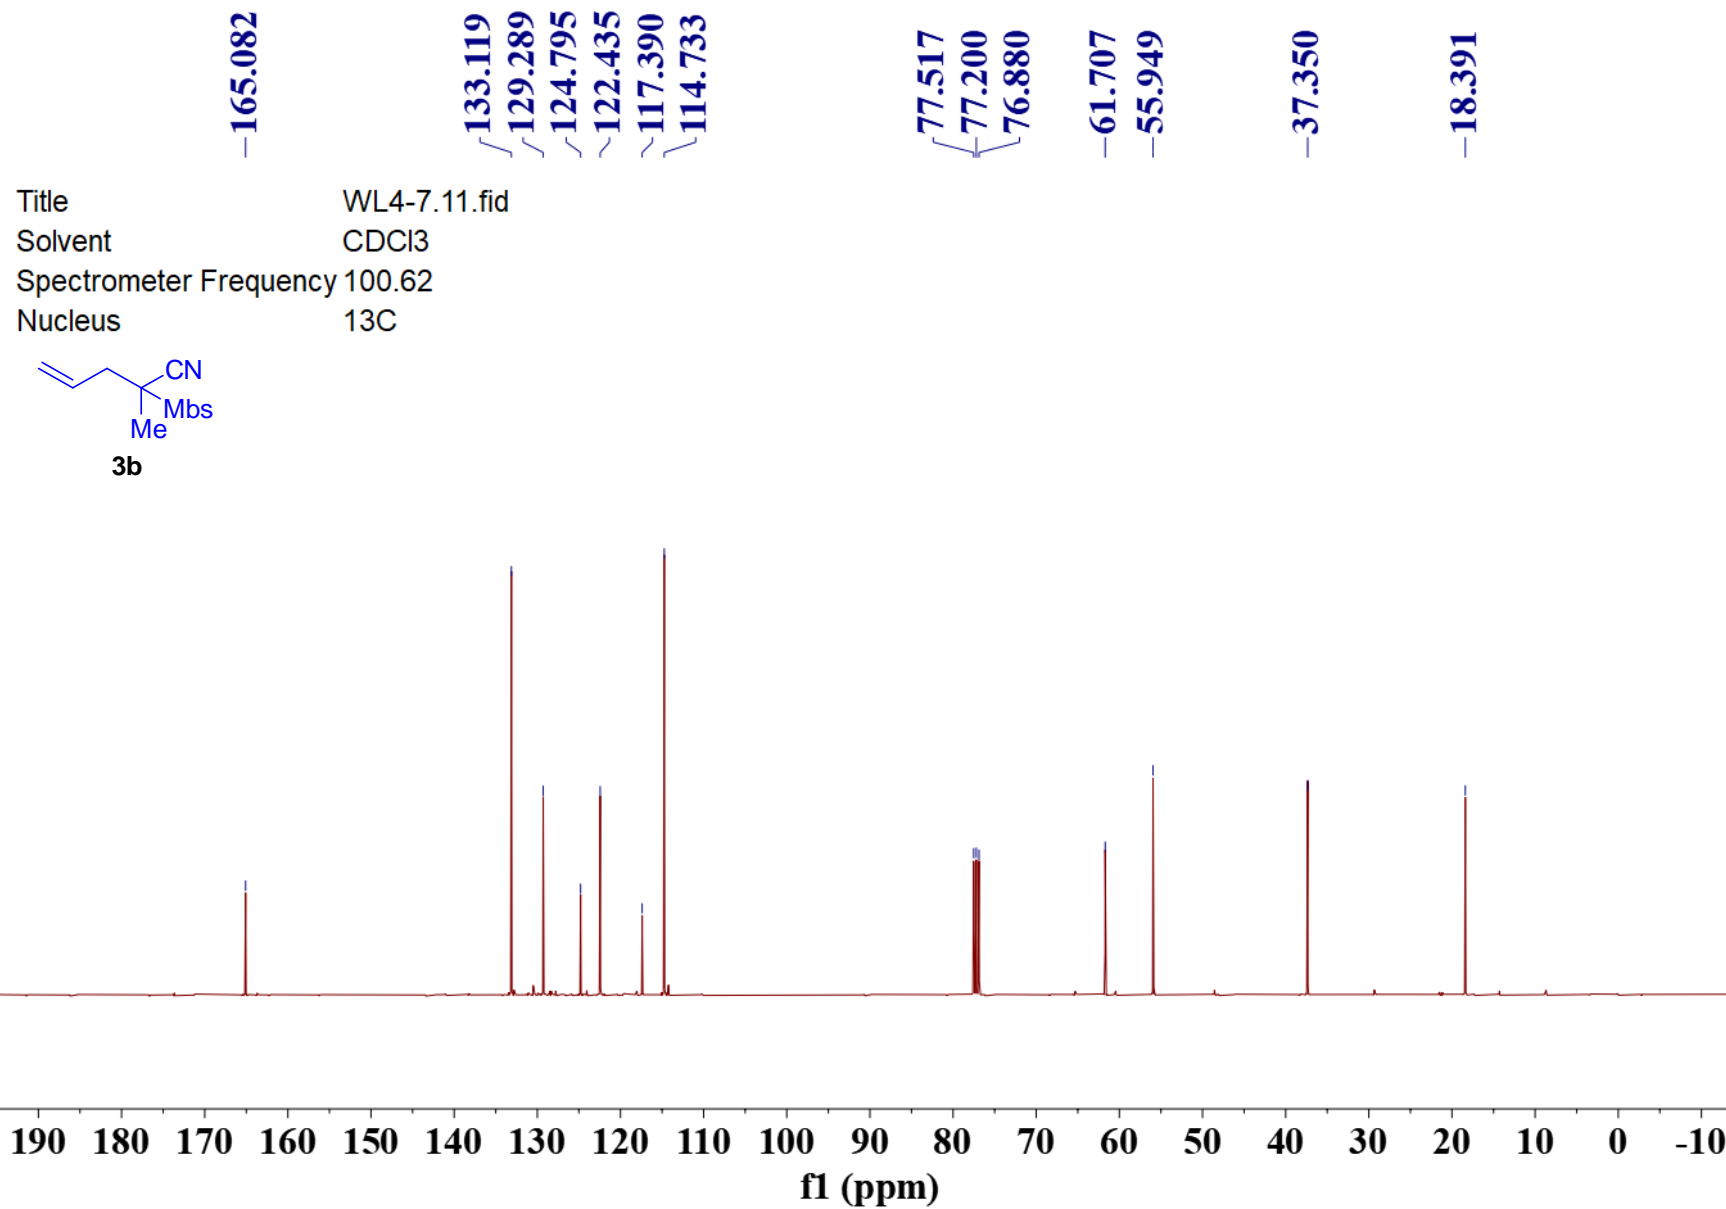

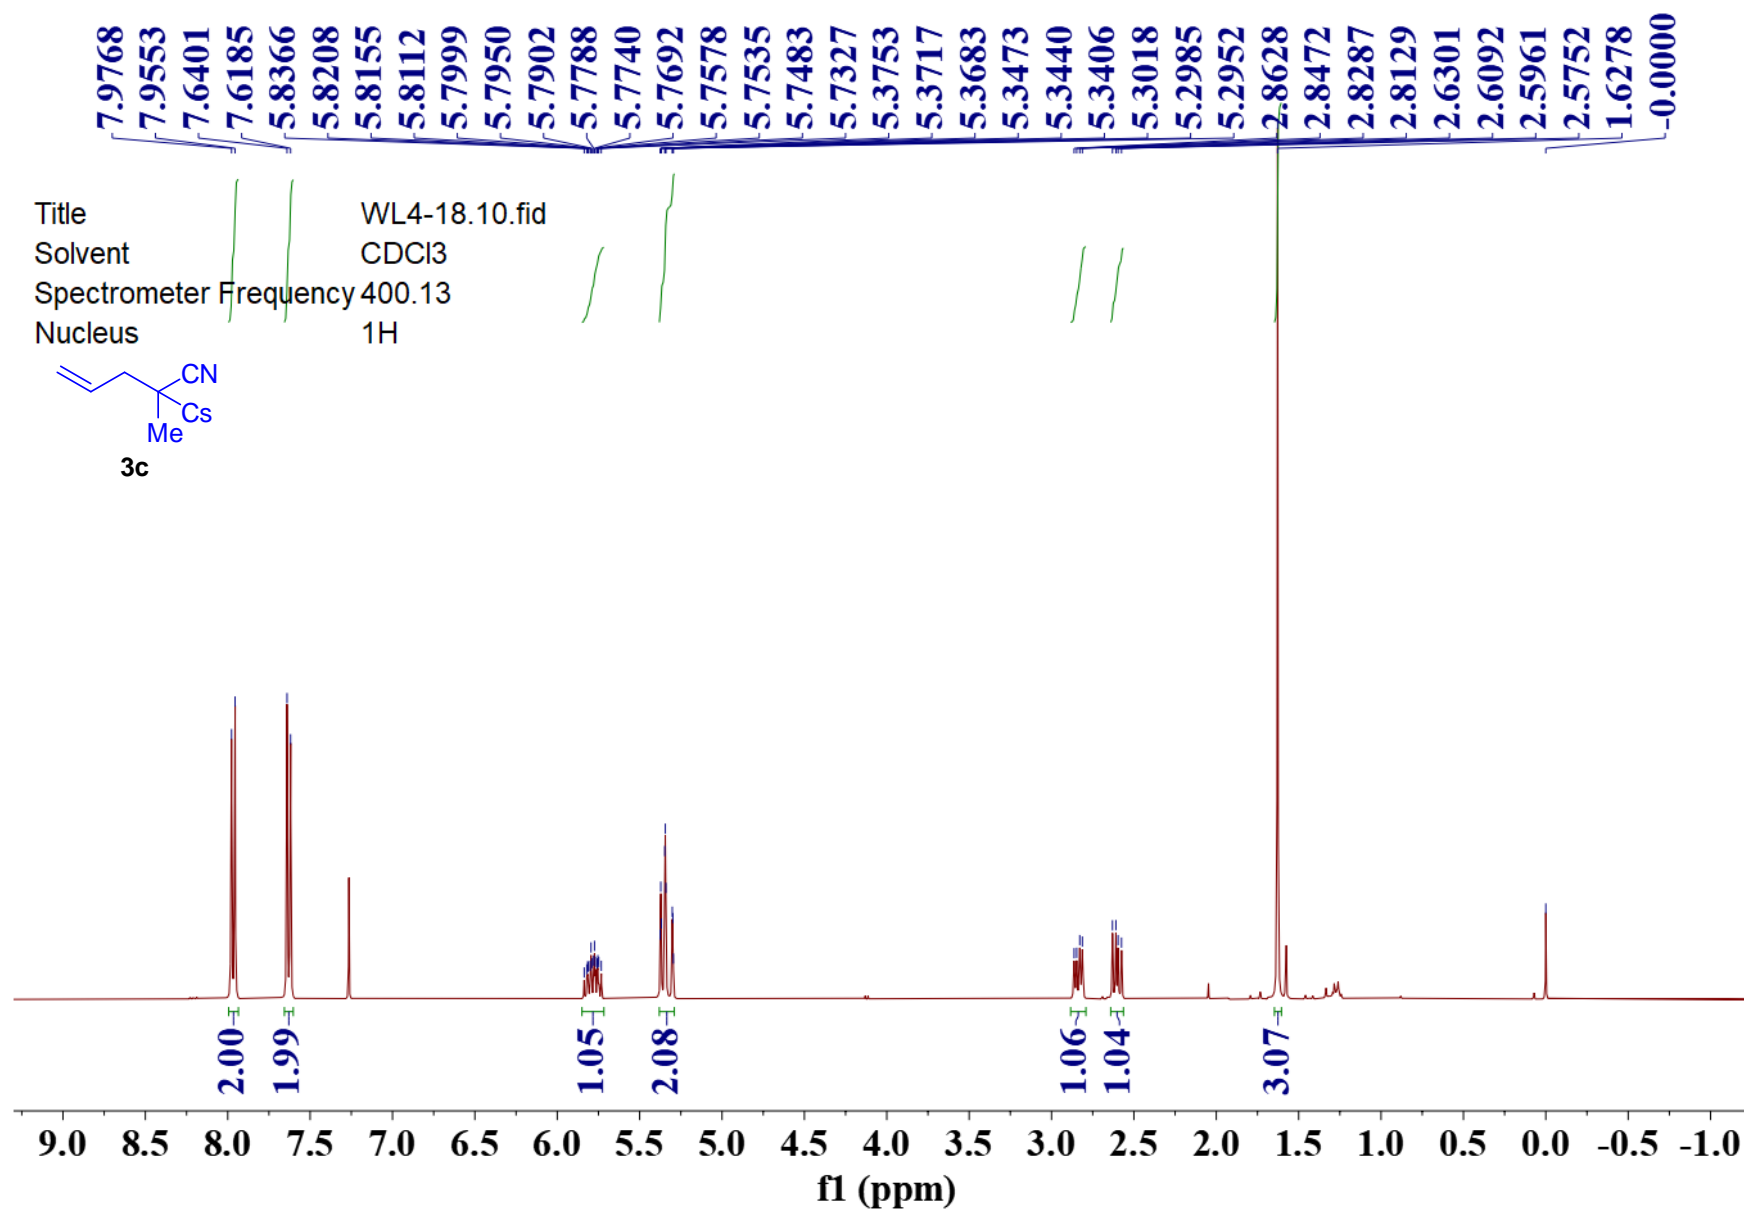

Title WL4-18.11.fid  
Solvent CDCl3  
Spectrometer Frequency 100.62  
Nucleus 13C

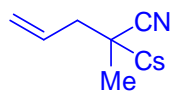

3c

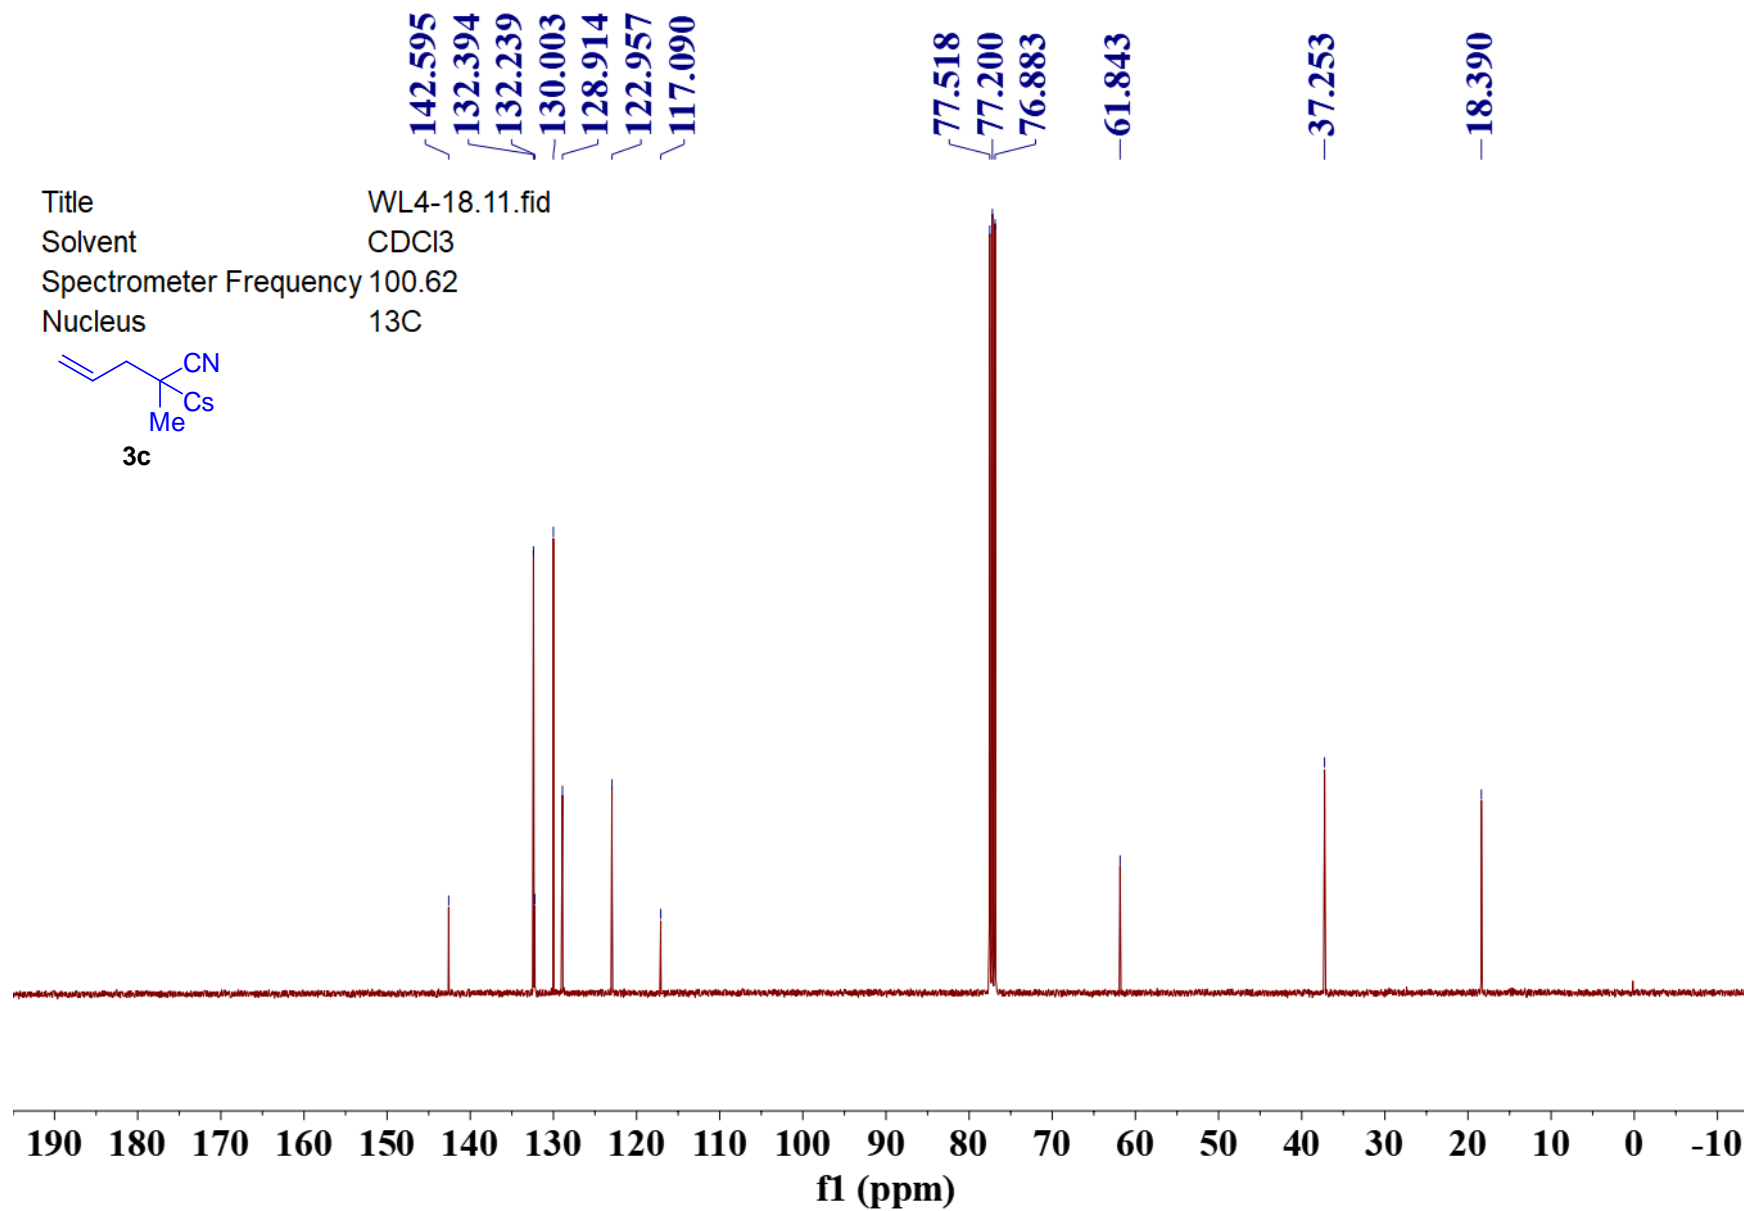

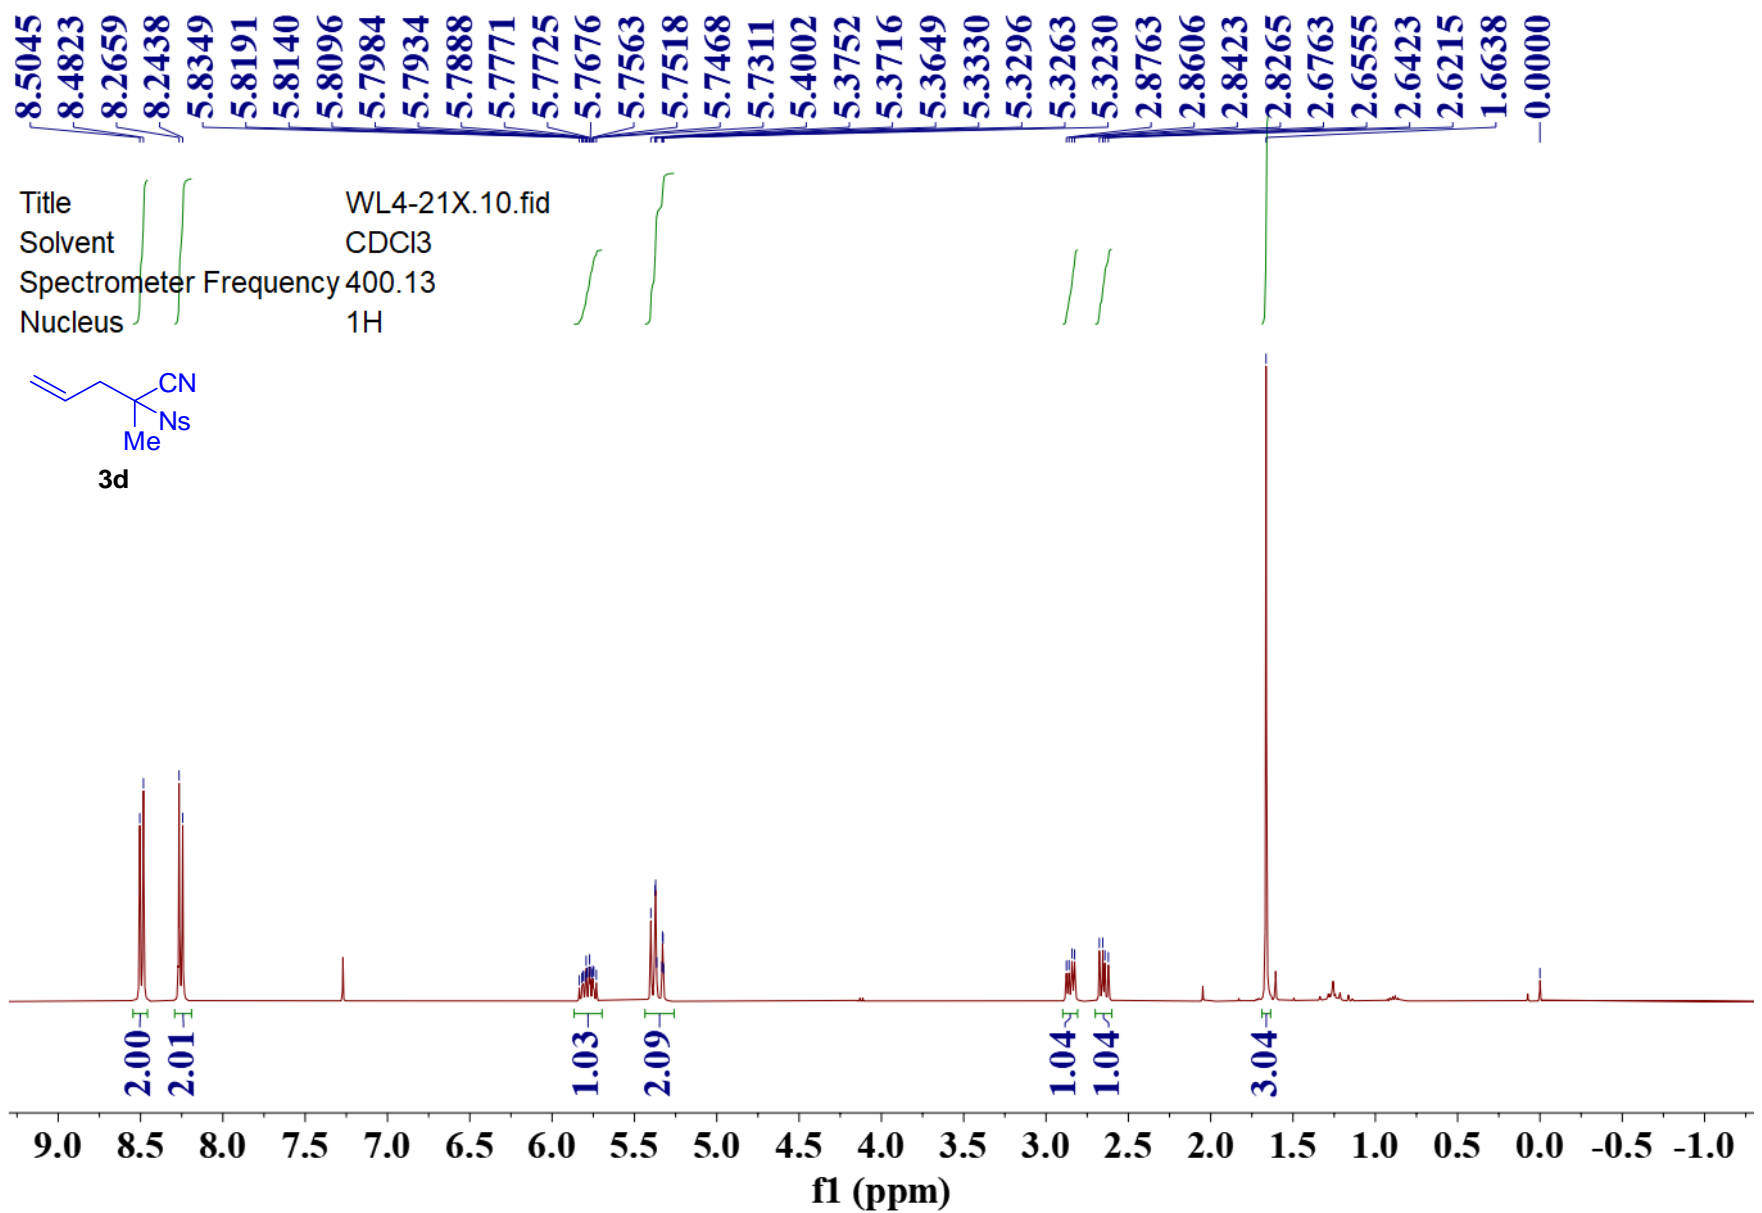

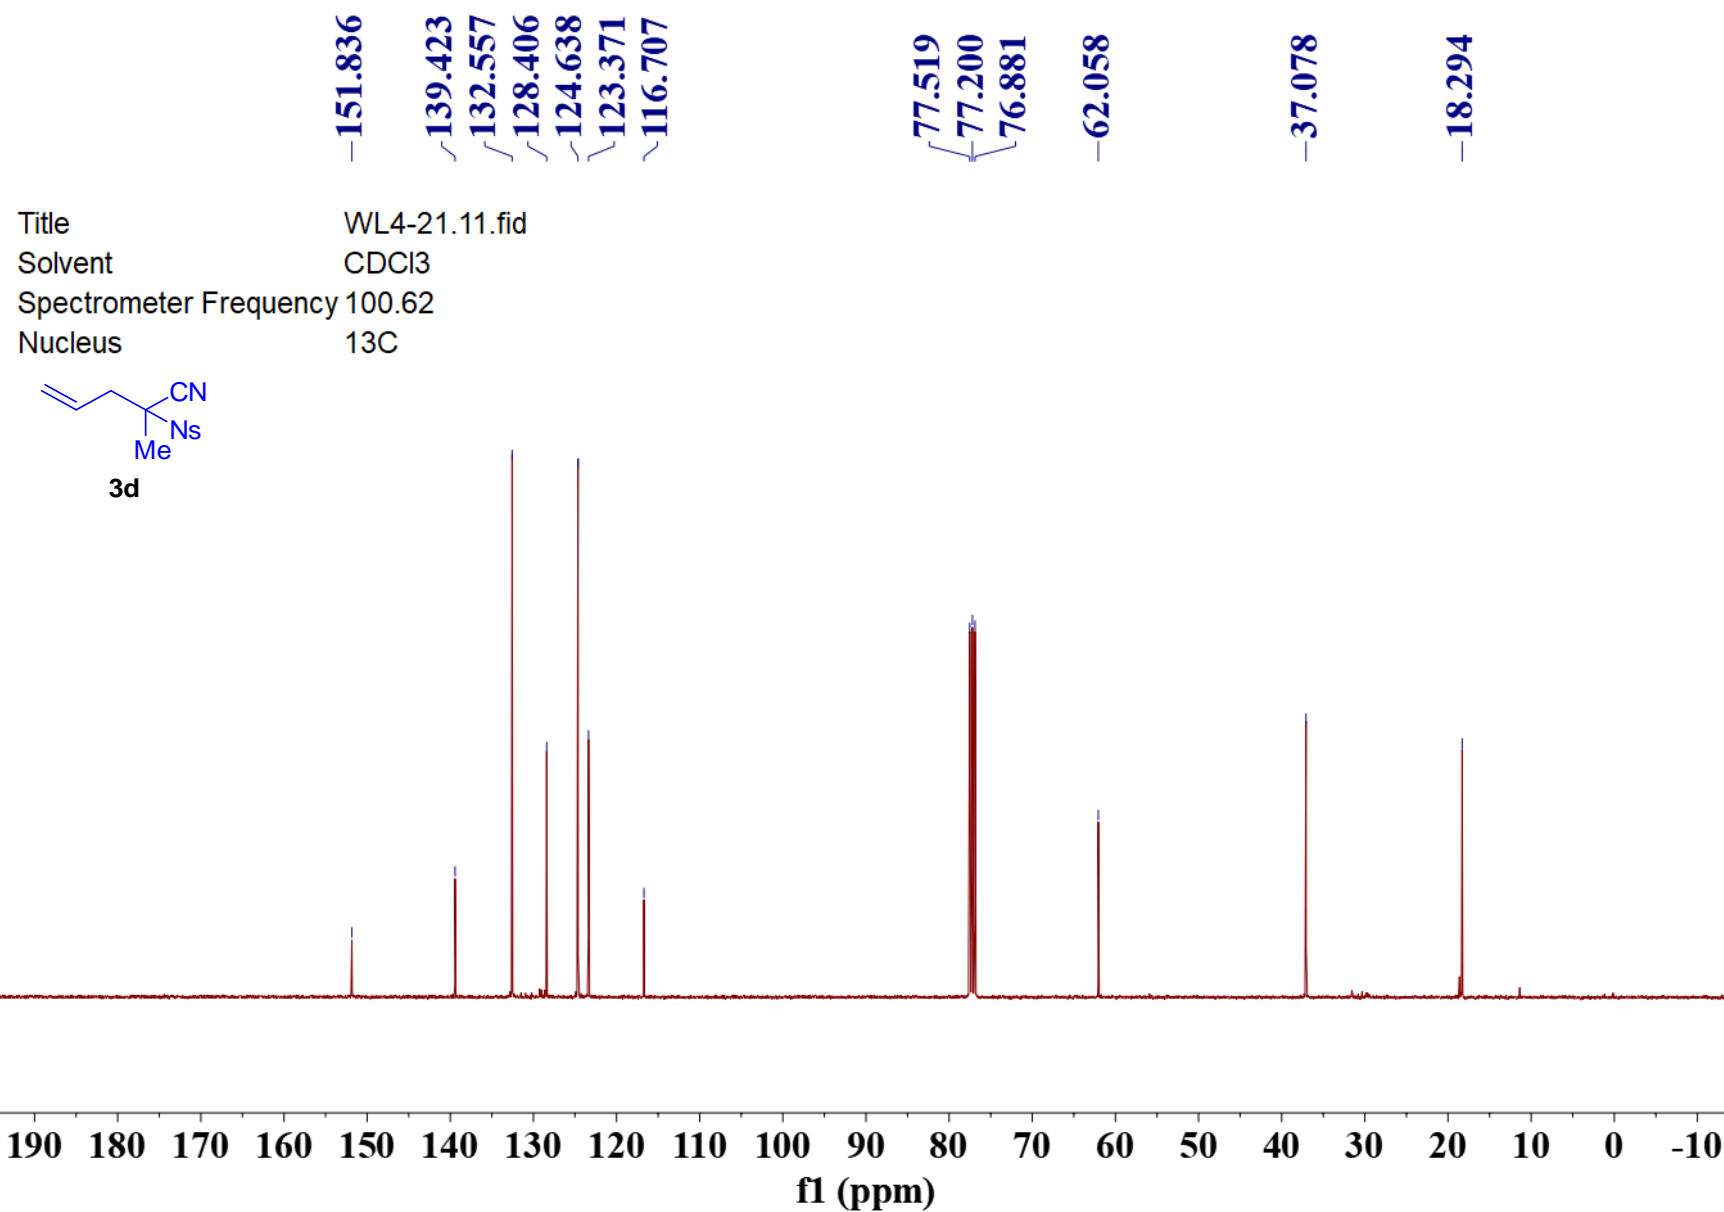

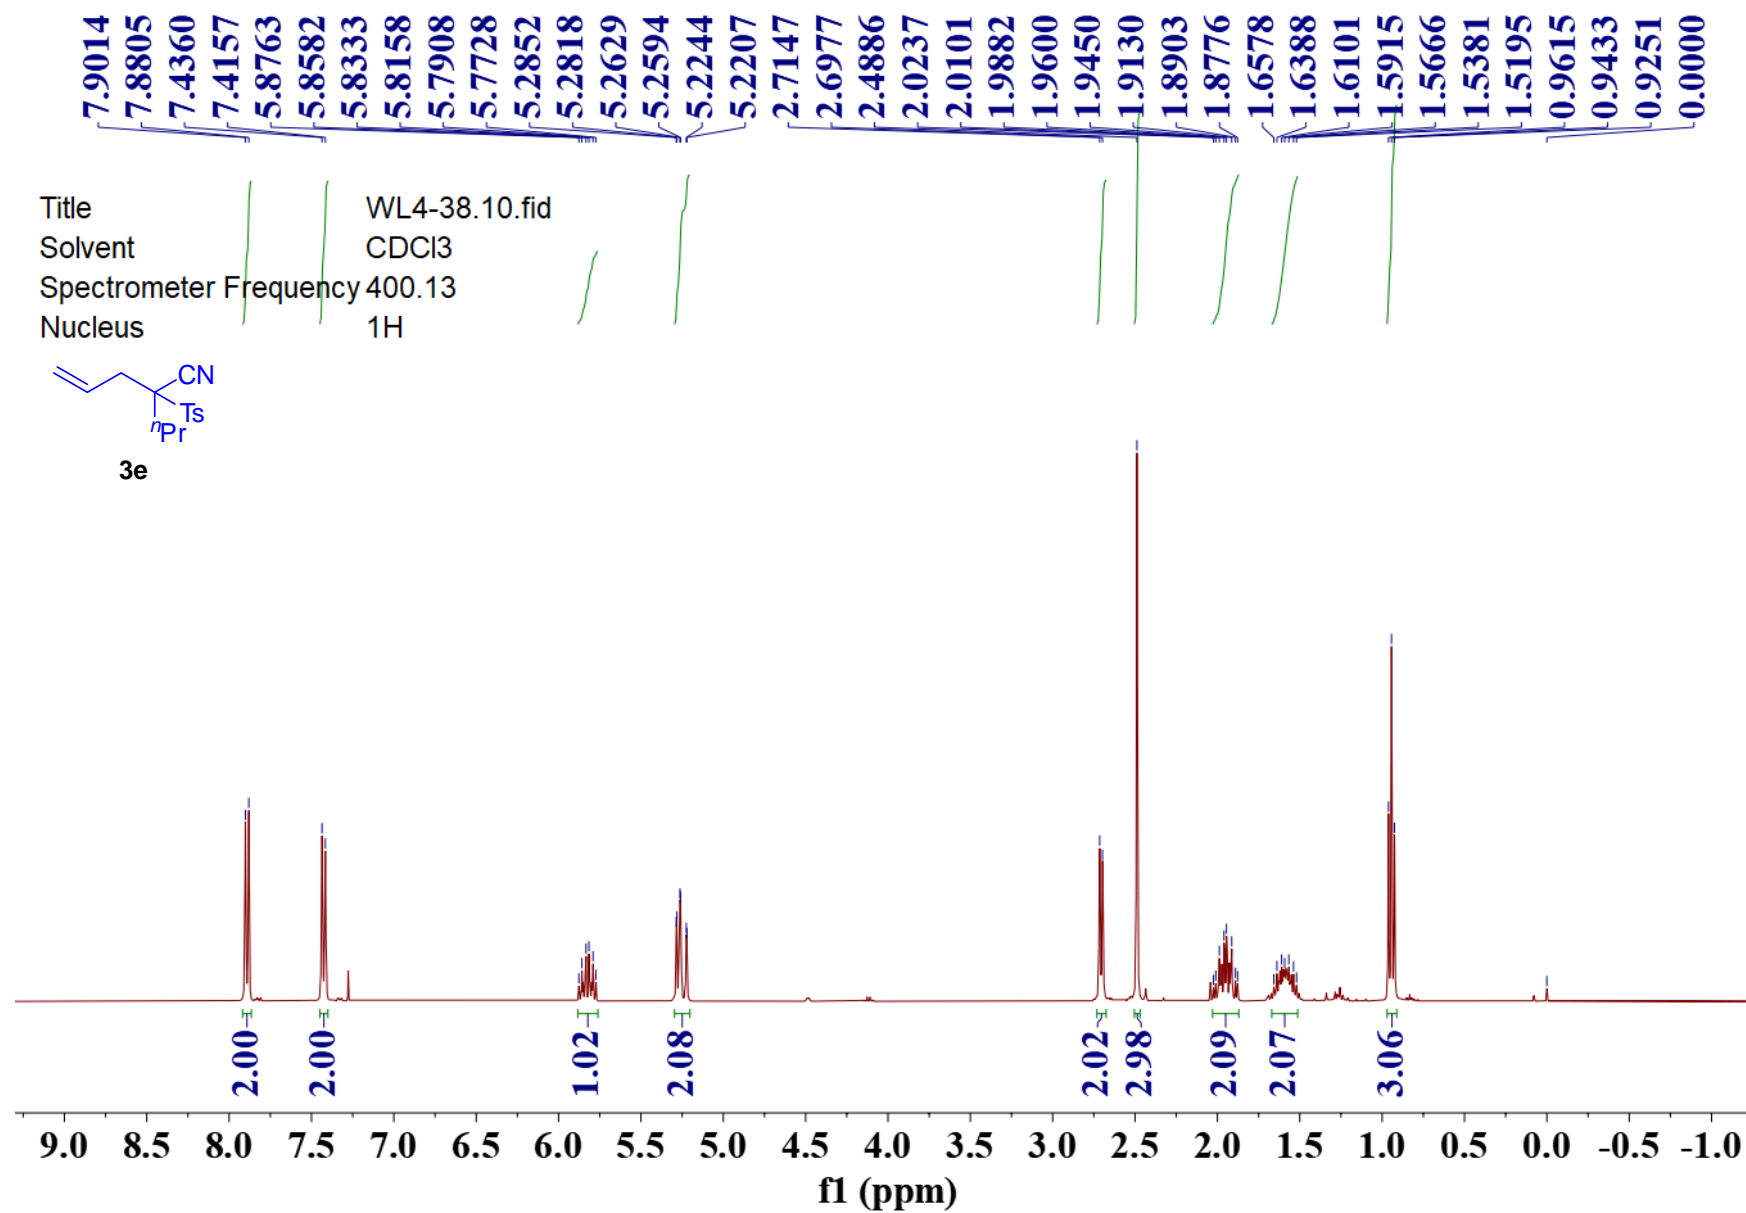



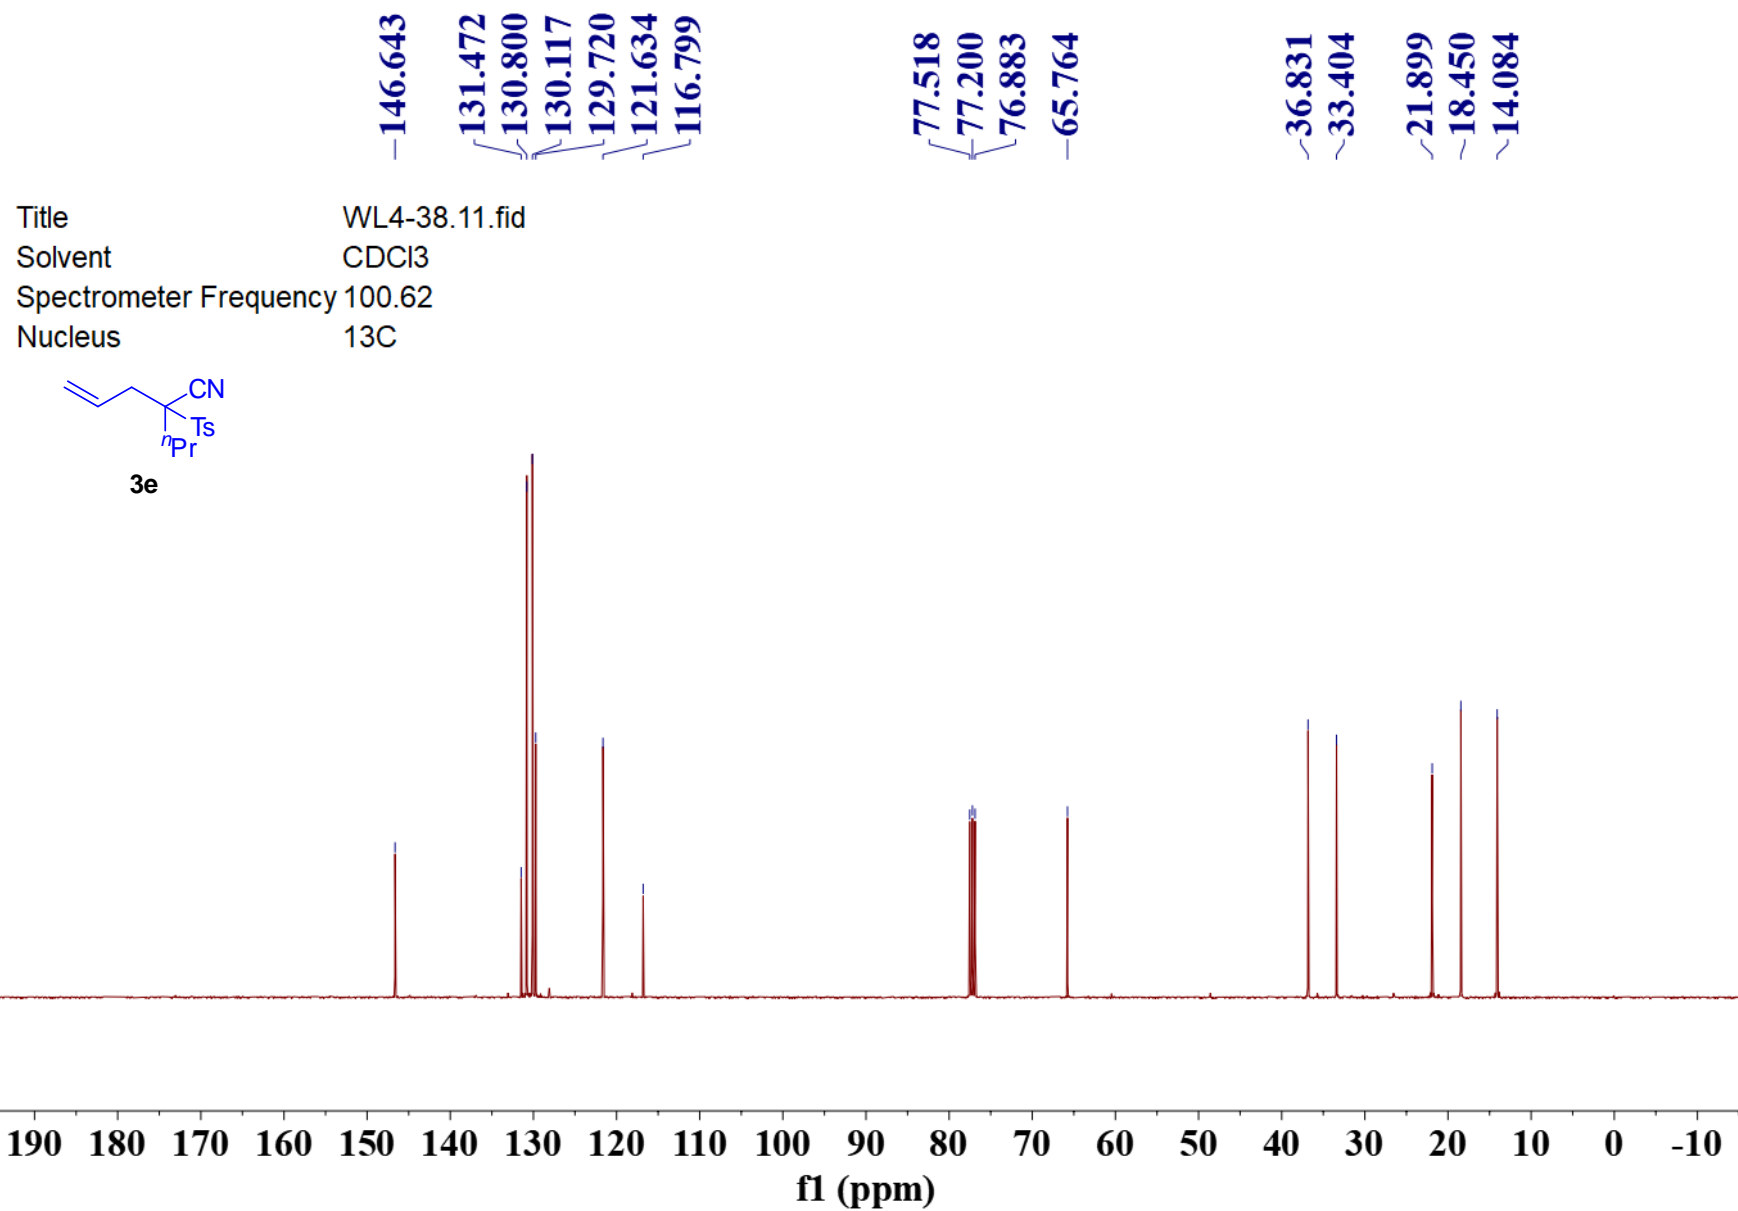

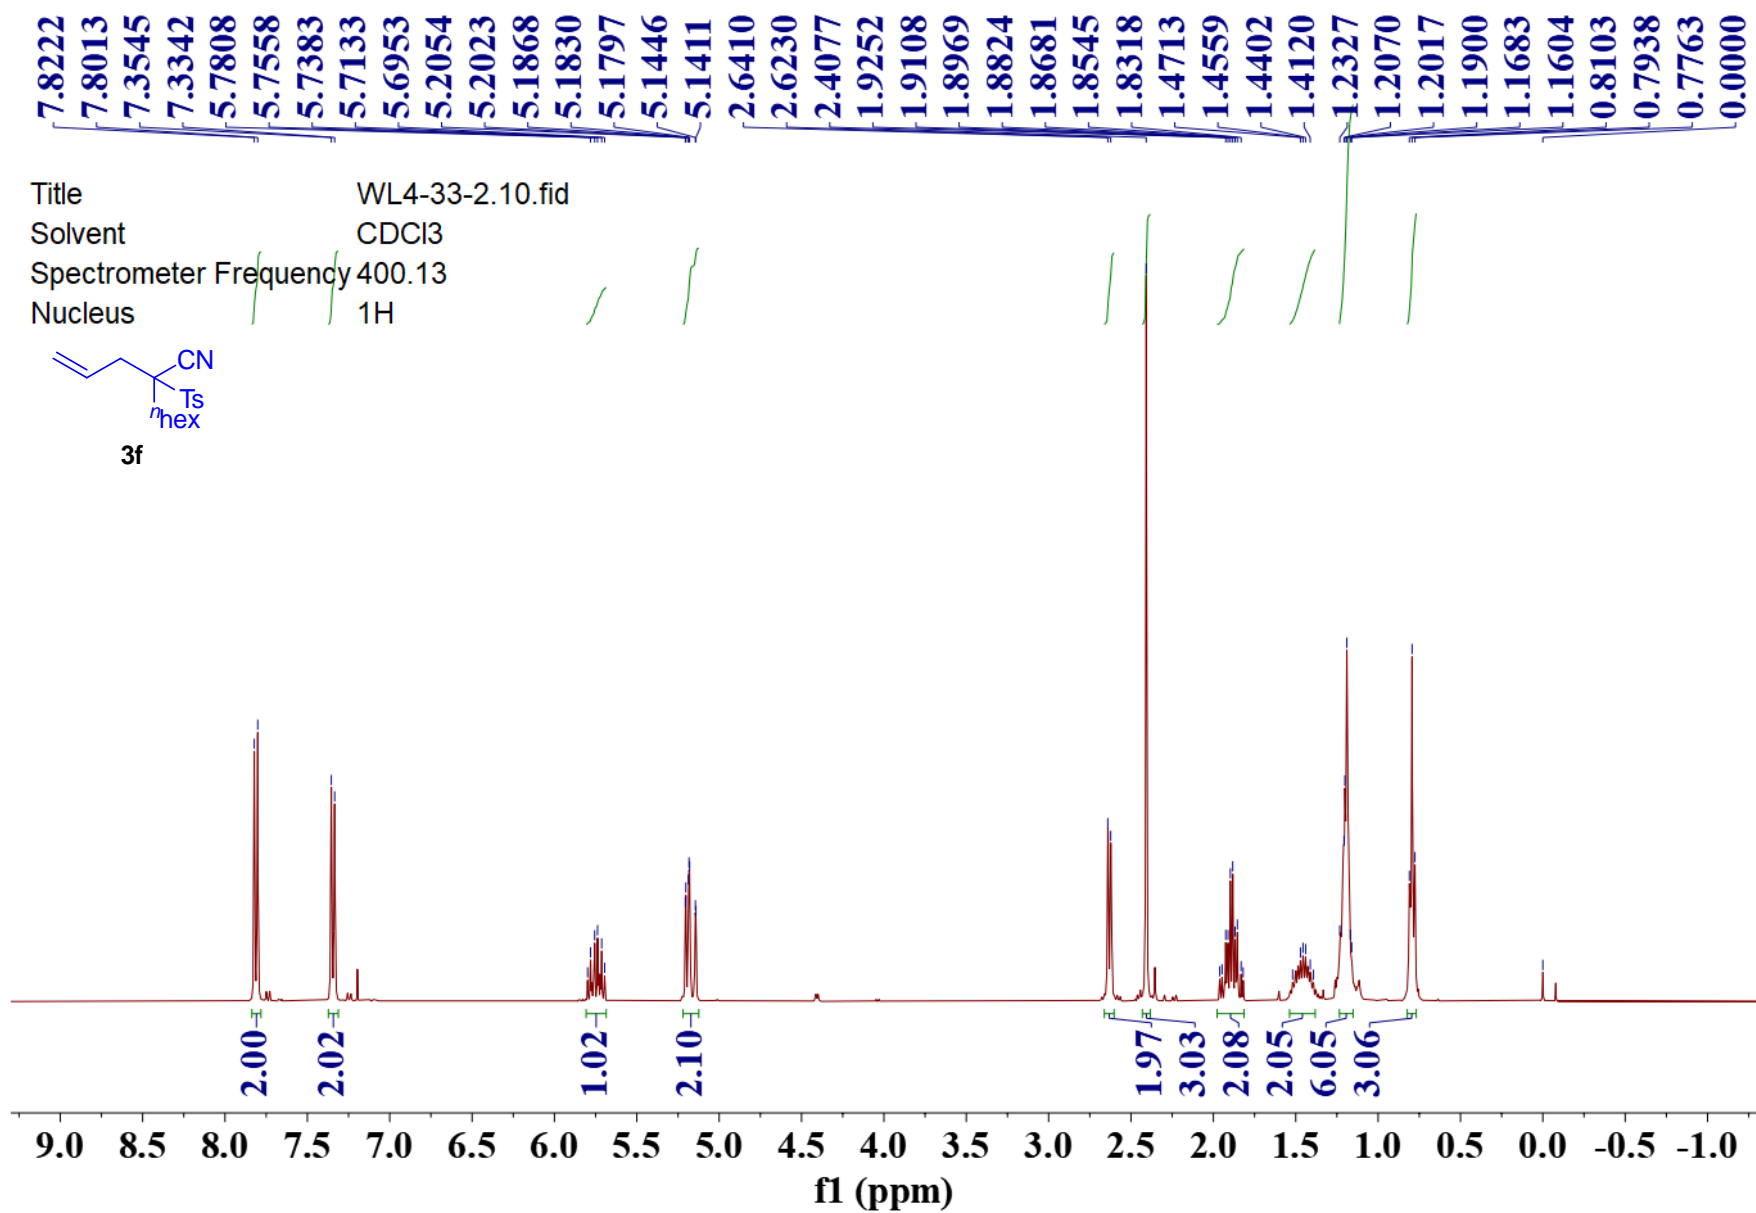

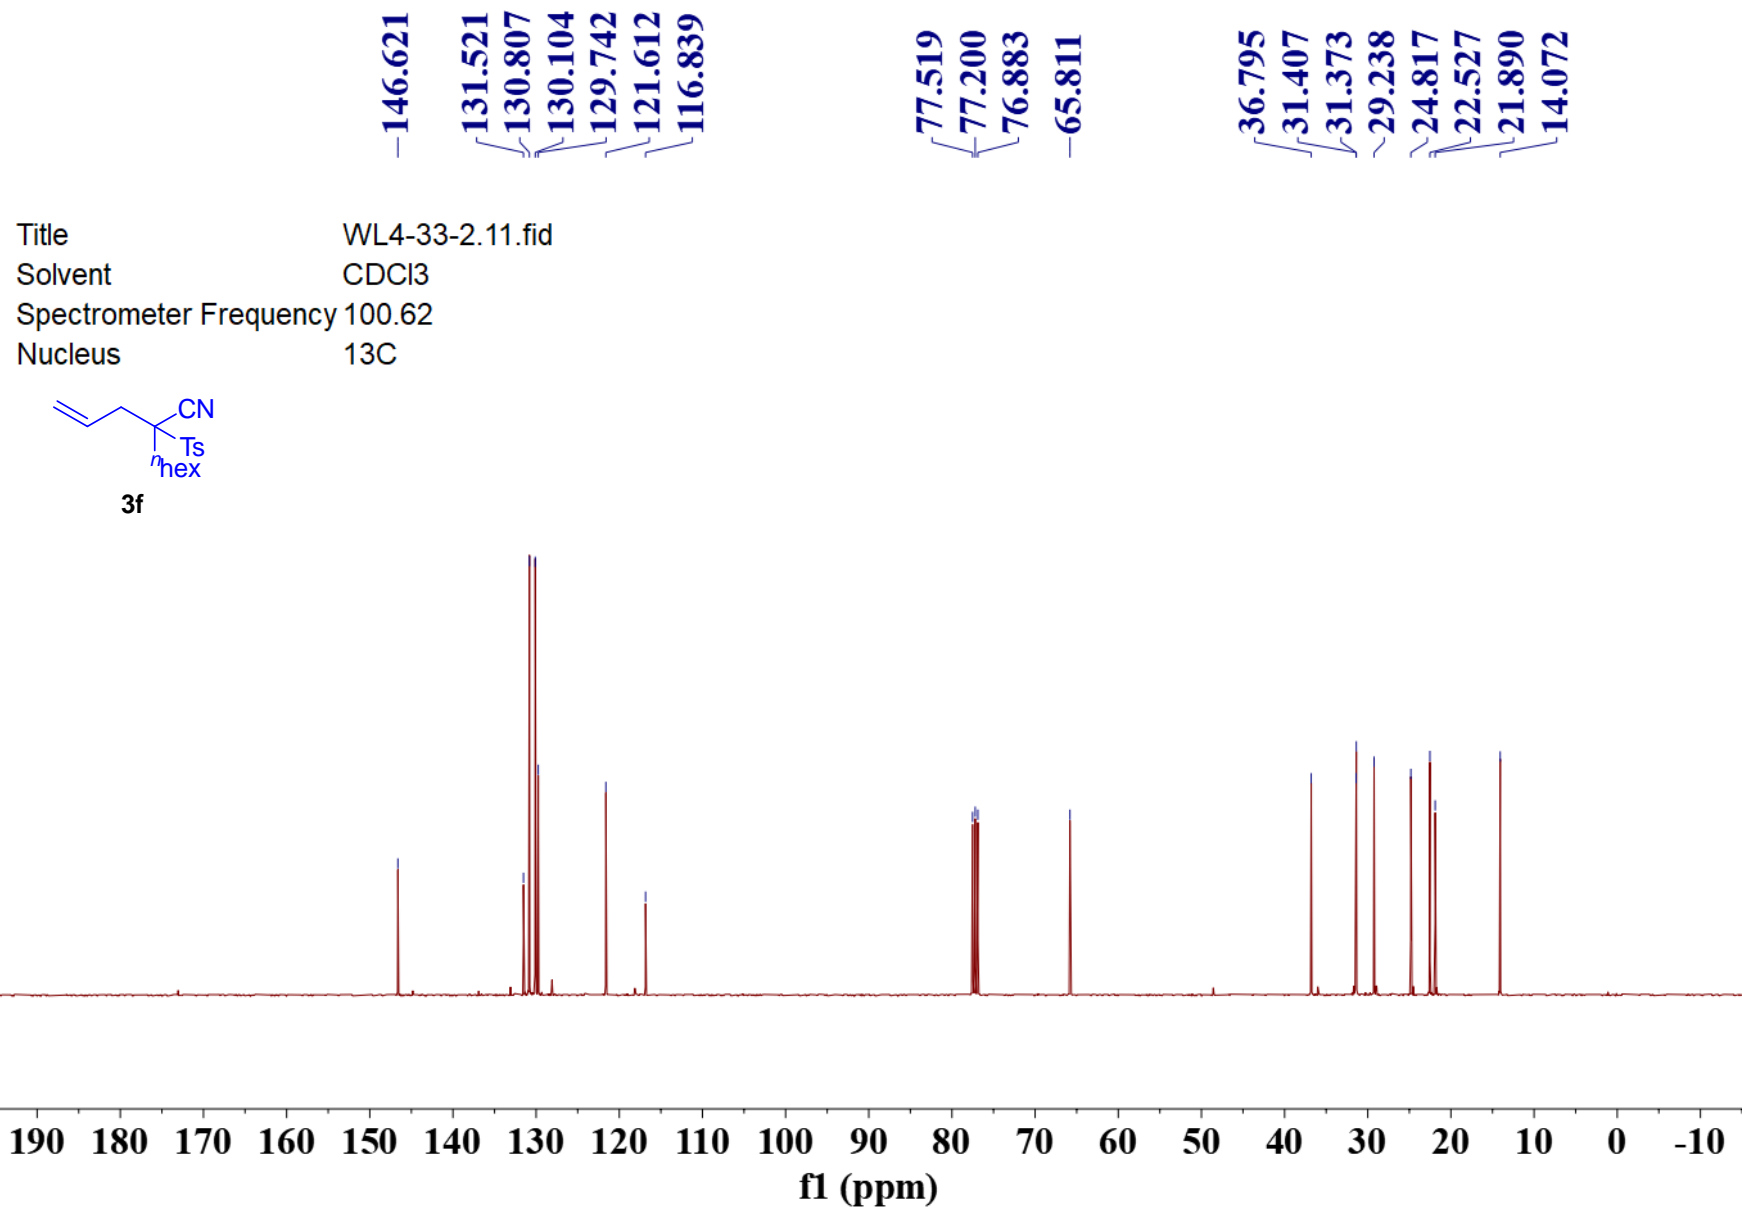

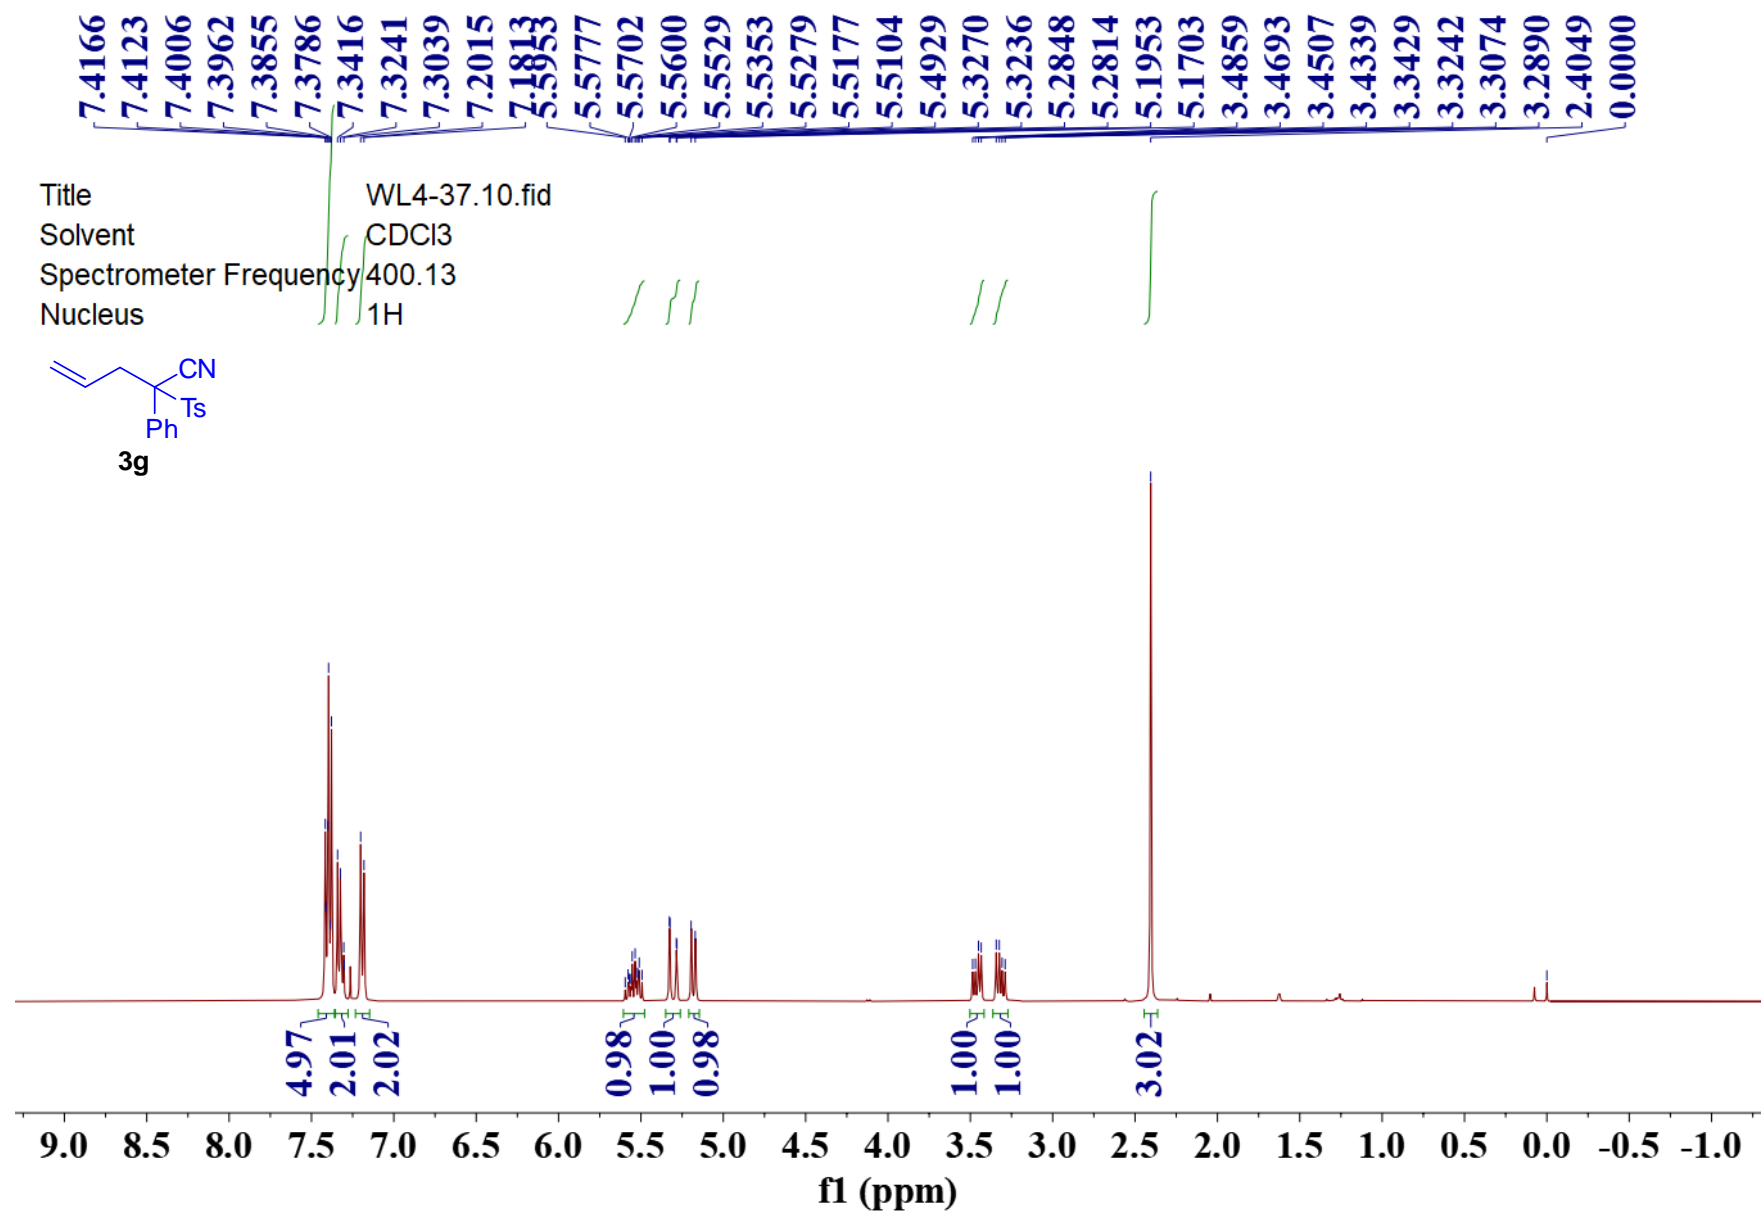

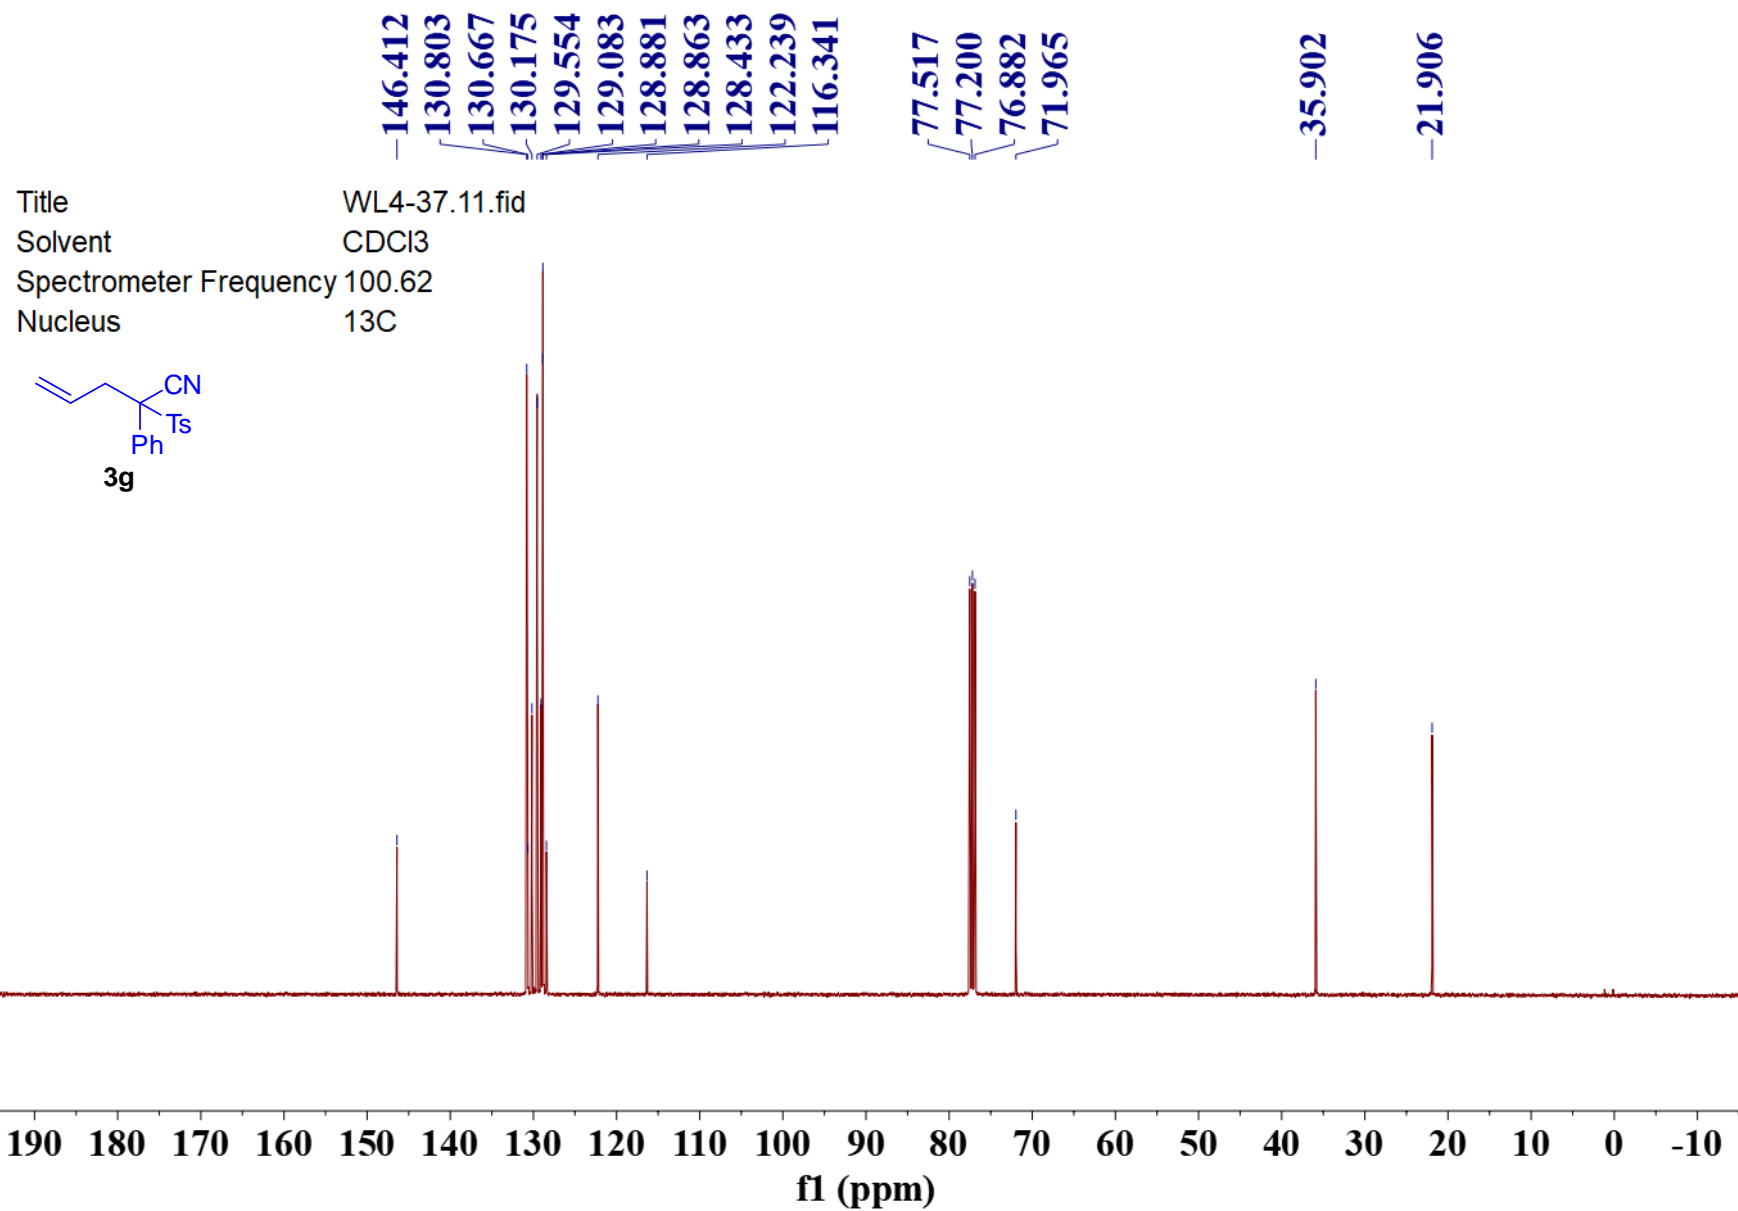

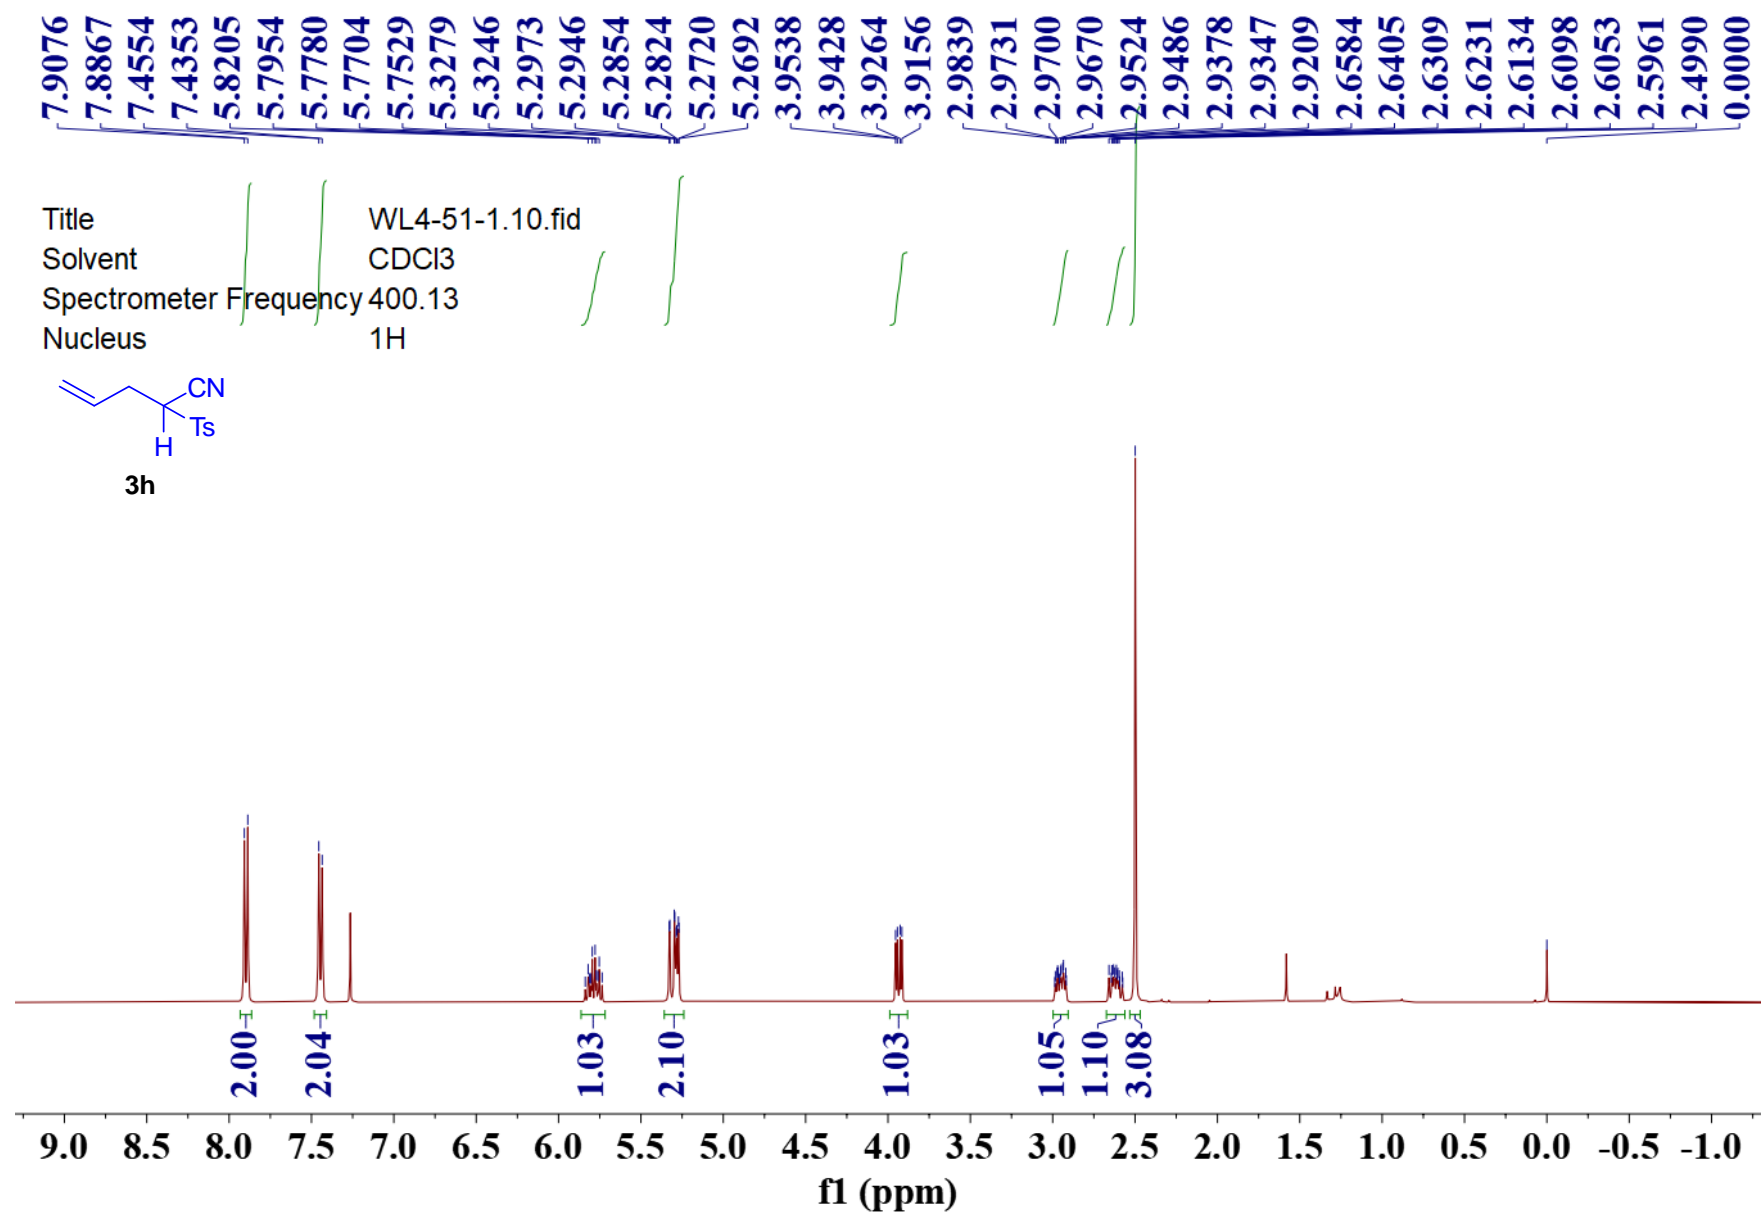

Title WL4-51-1.10.fid  
Solvent CDCl<sub>3</sub>  
Spectrometer Frequency 100.62  
Nucleus <sup>13</sup>C

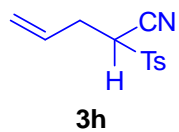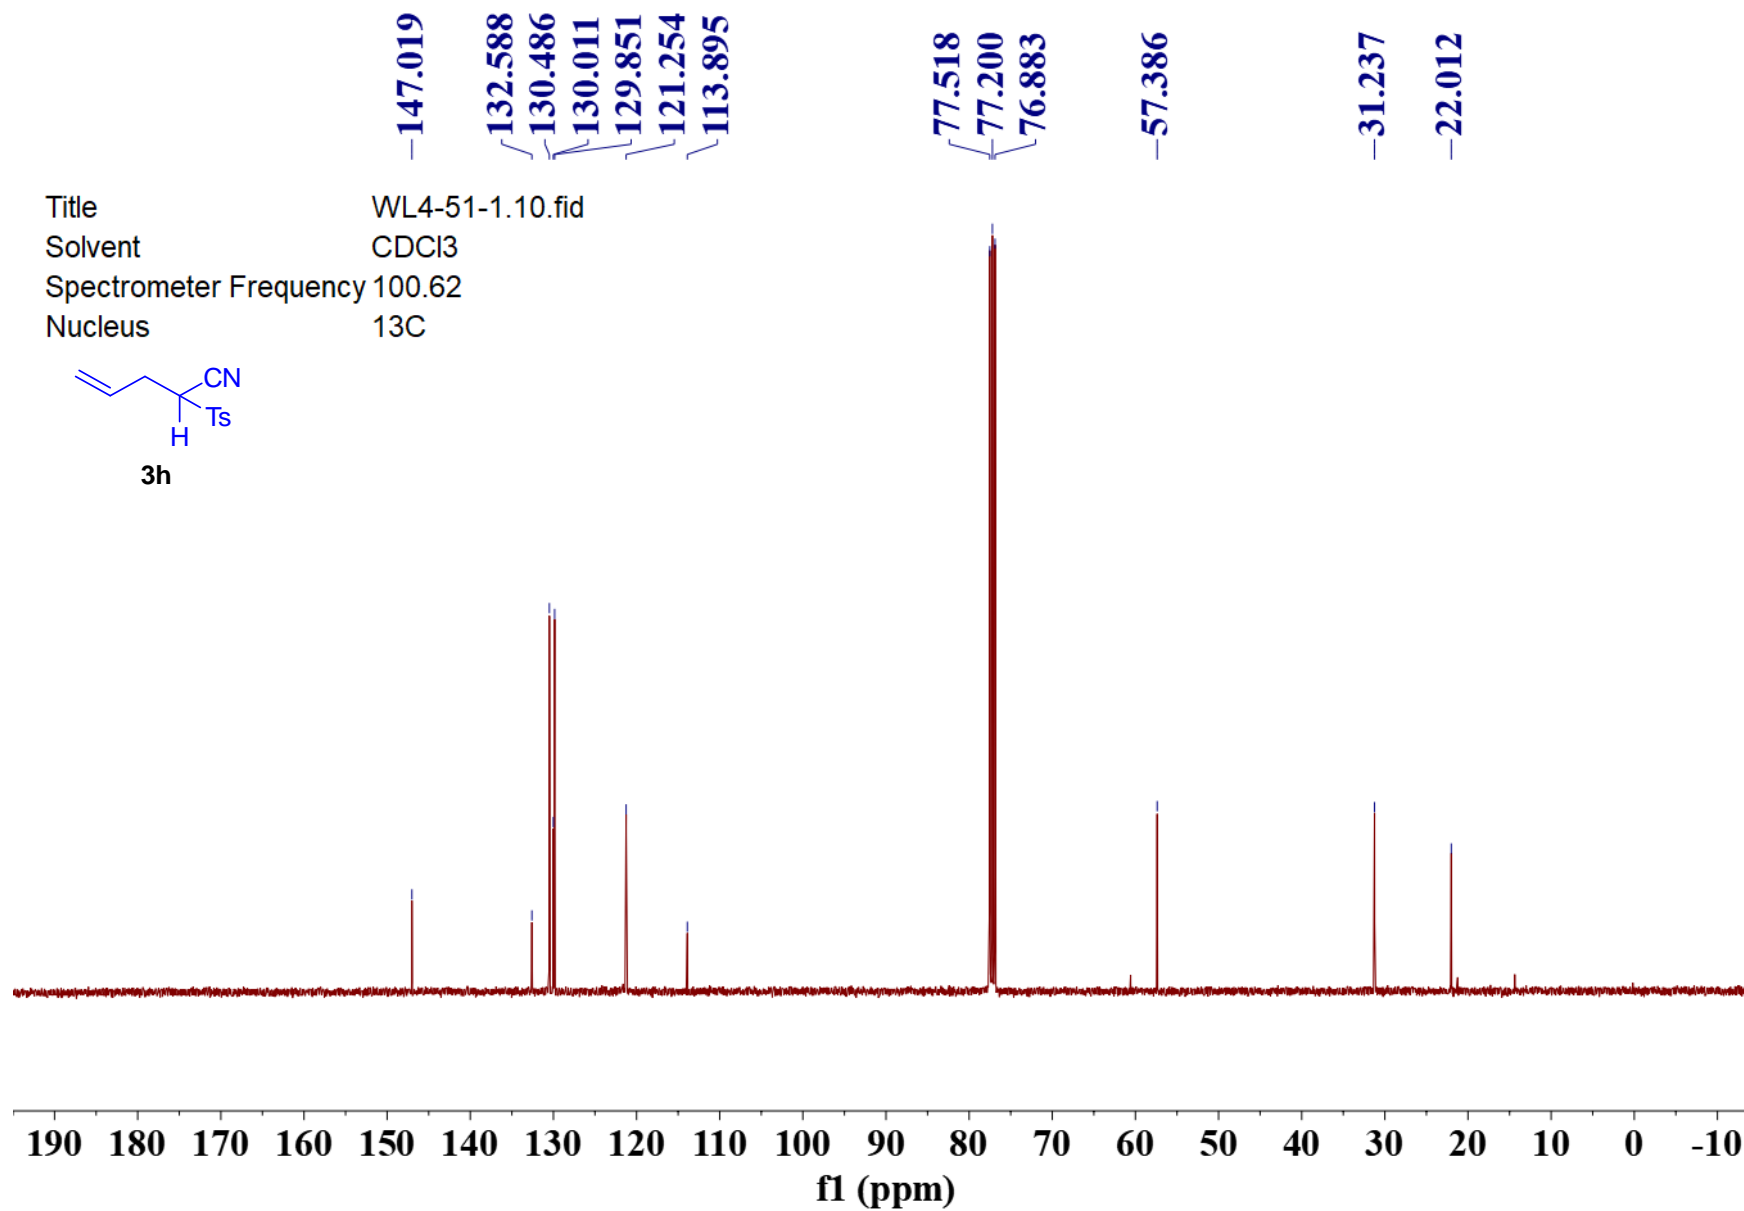

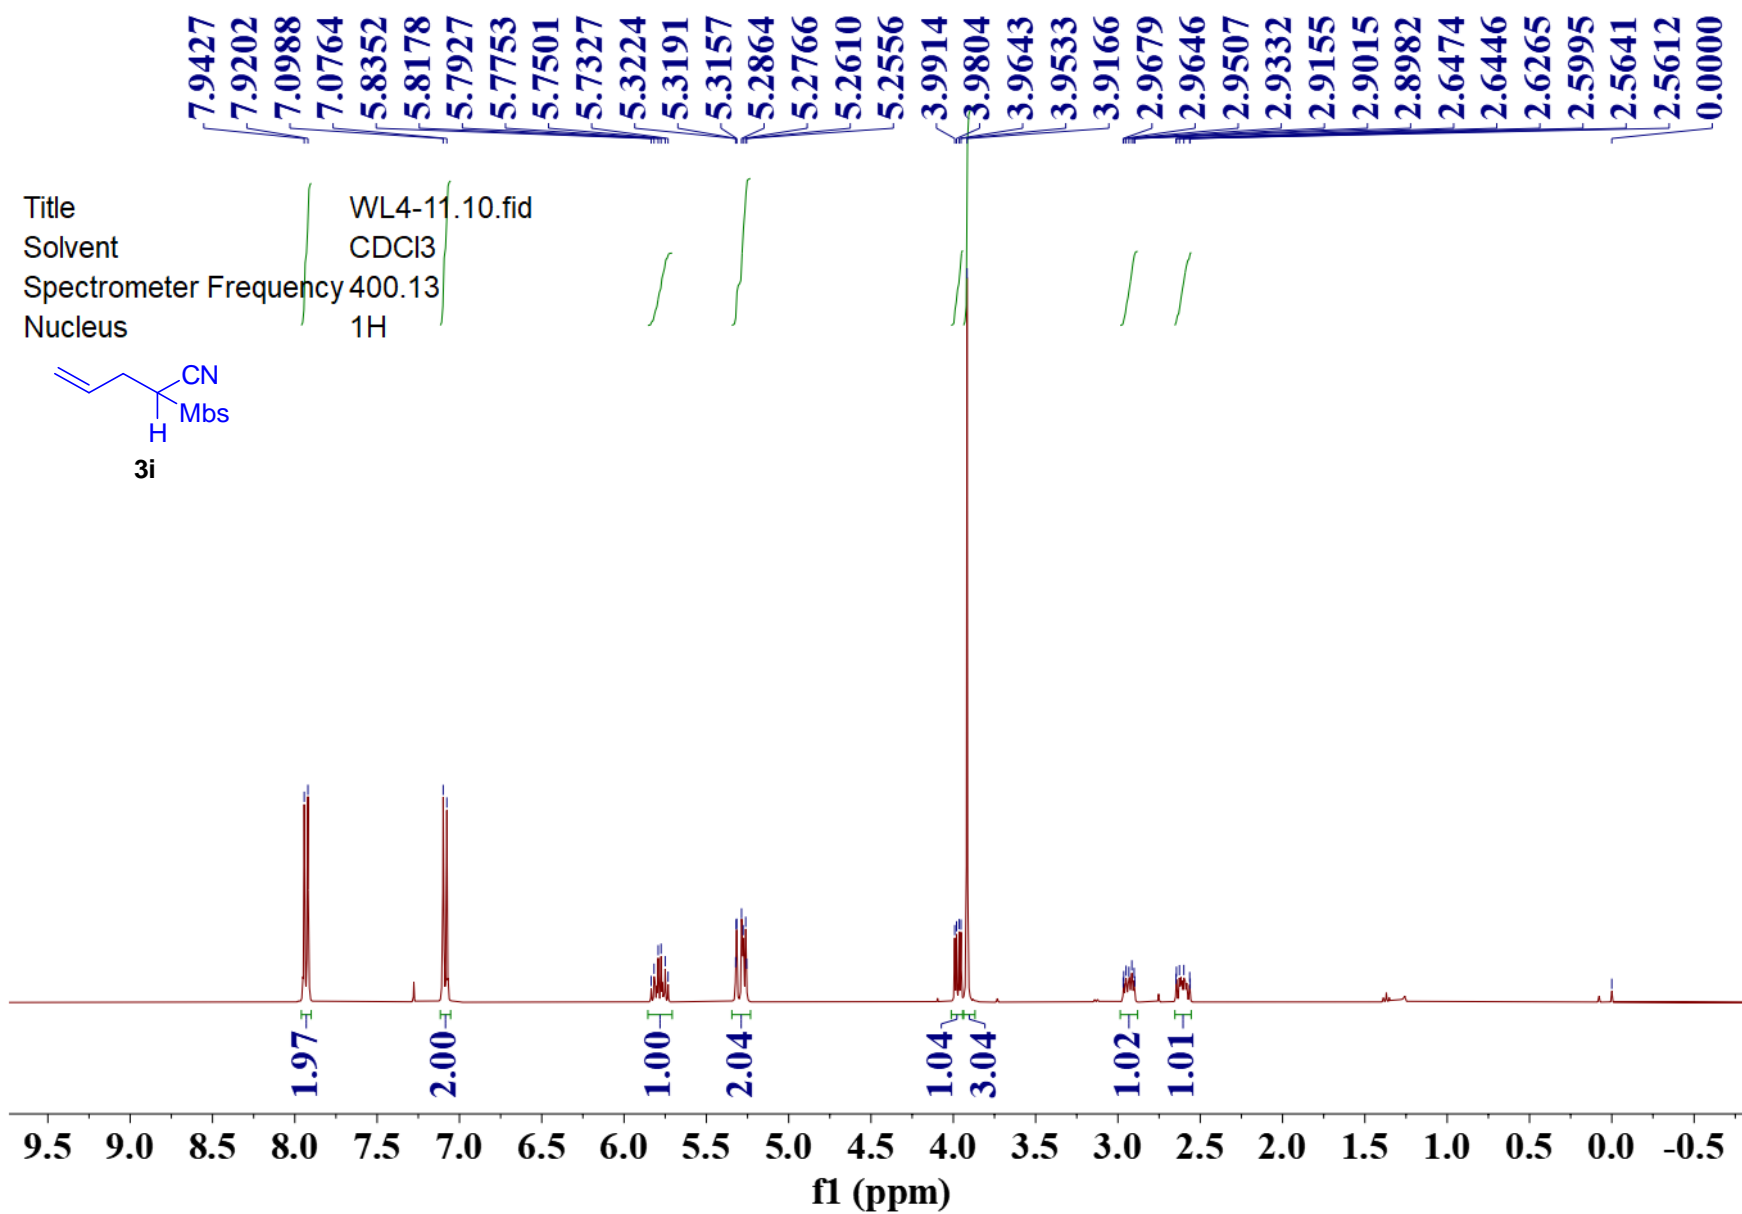



165.191  
 132.081  
 130.047  
 126.687  
 121.076  
 114.993  
 114.021  
 77.520  
 77.200  
 76.883  
 57.430  
 56.005  
 31.297

Title WL4-11.11.fid  
 Solvent CDCl<sub>3</sub>  
 Spectrometer Frequency 100.62  
 Nucleus <sup>13</sup>C

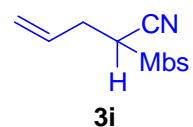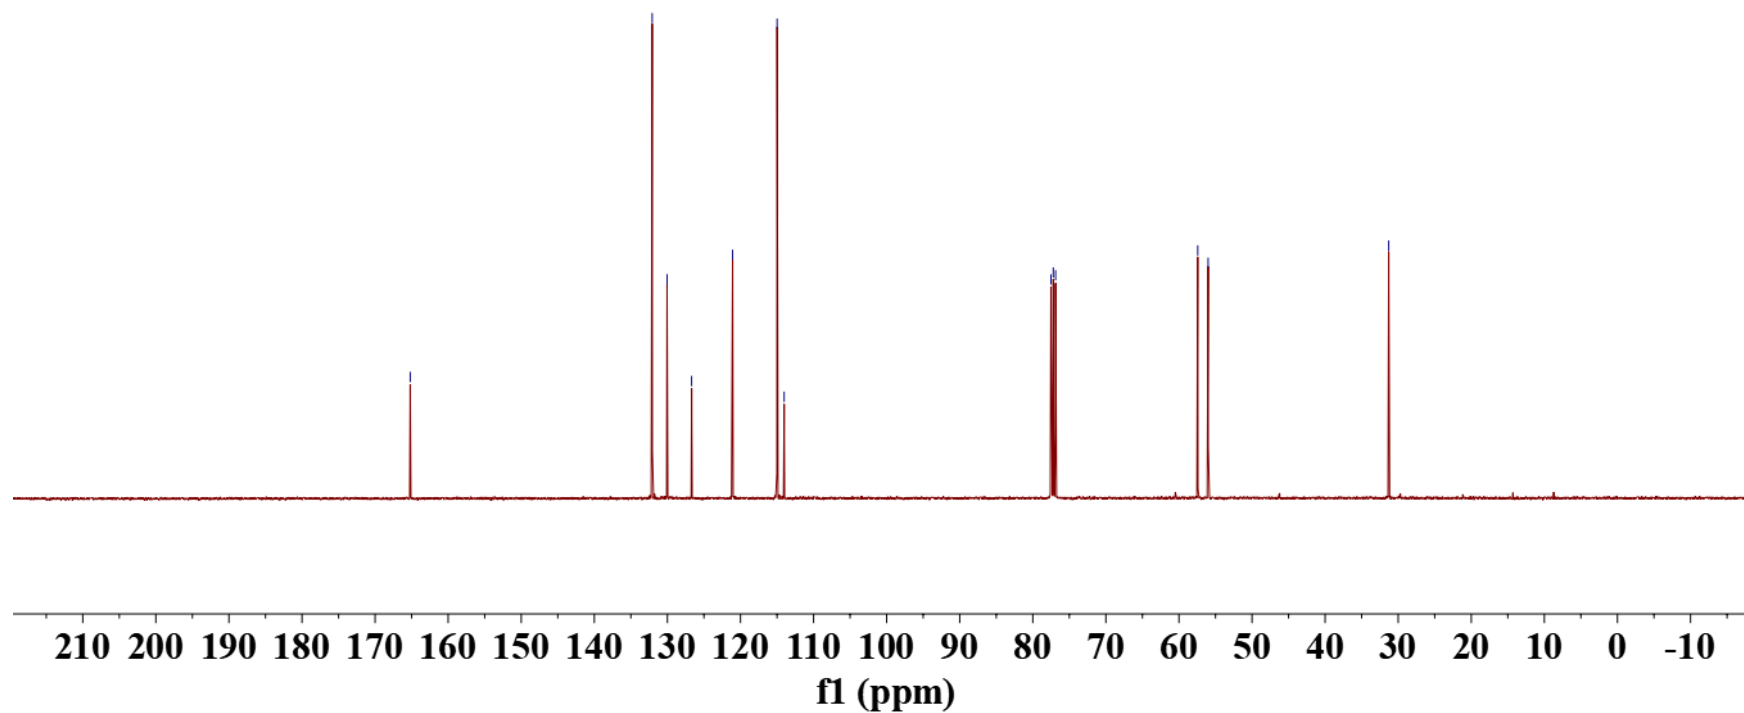

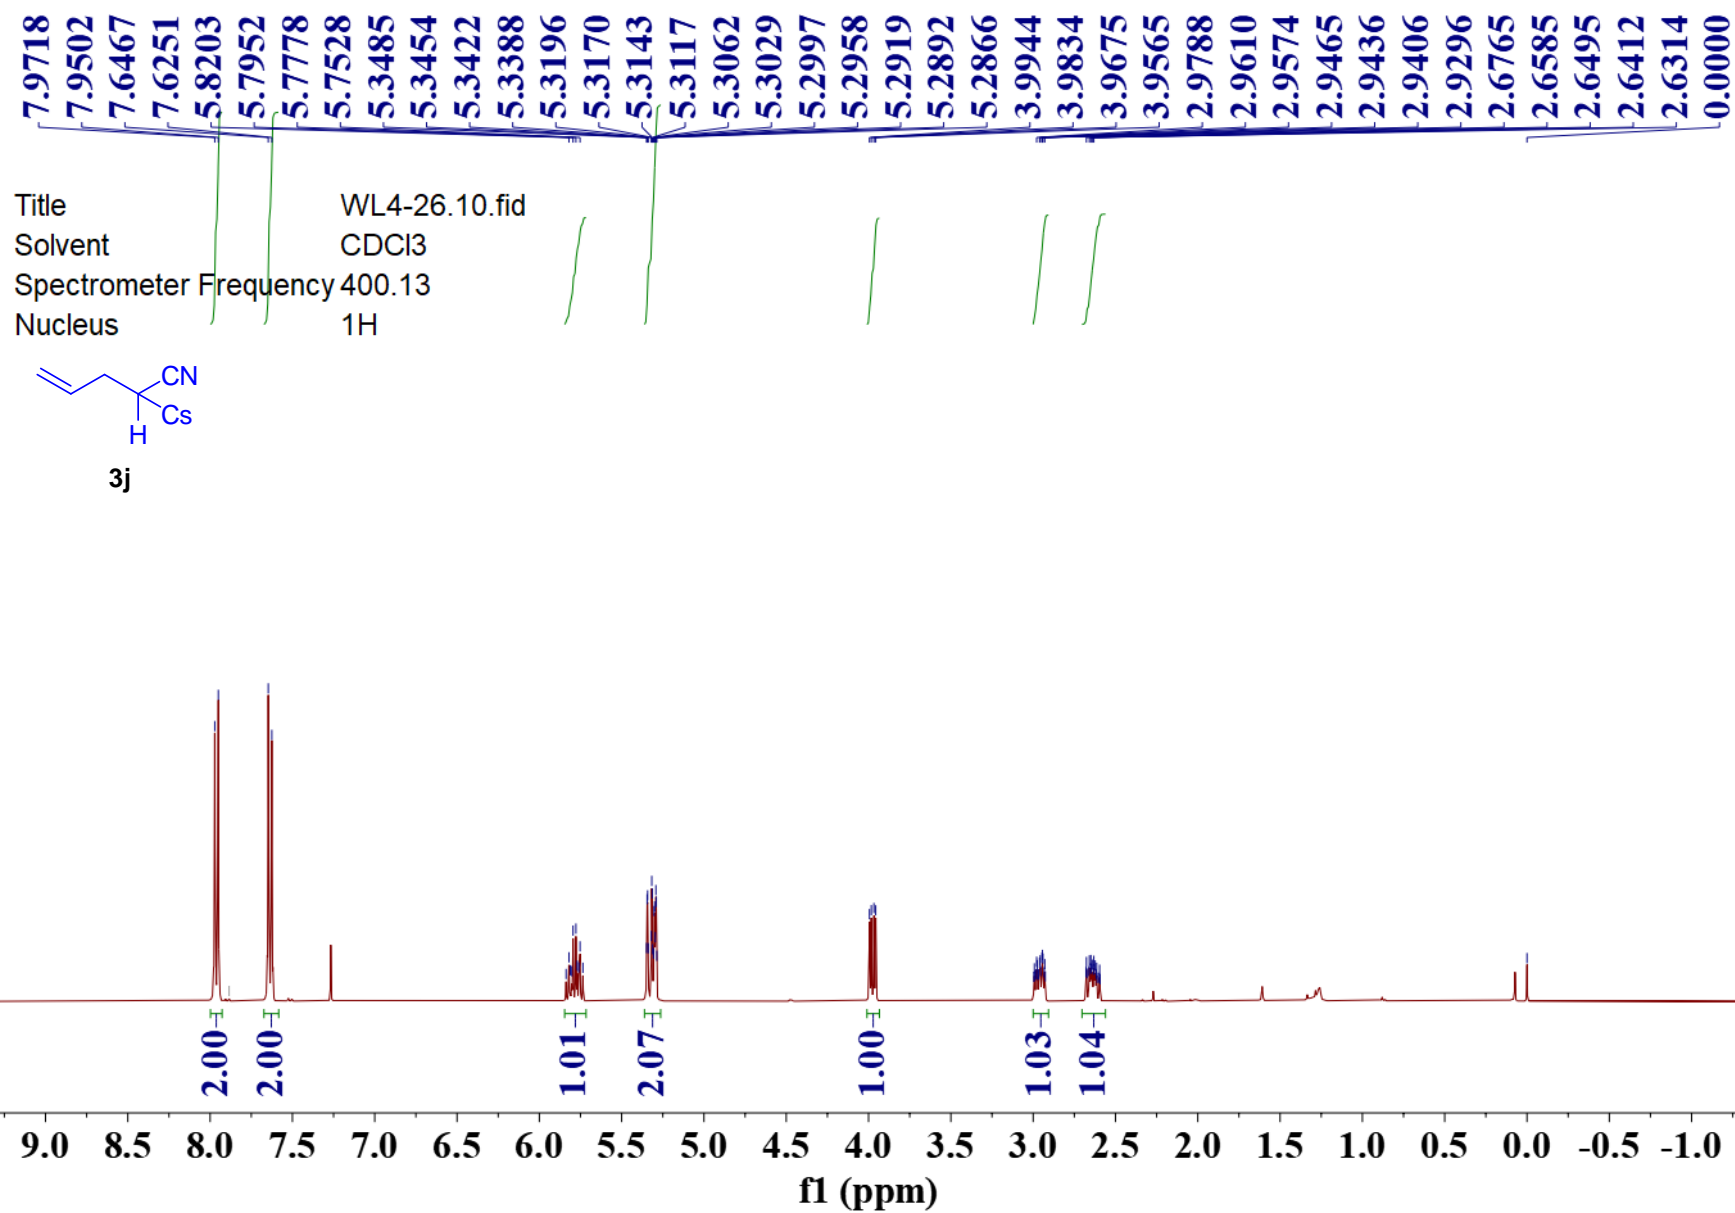

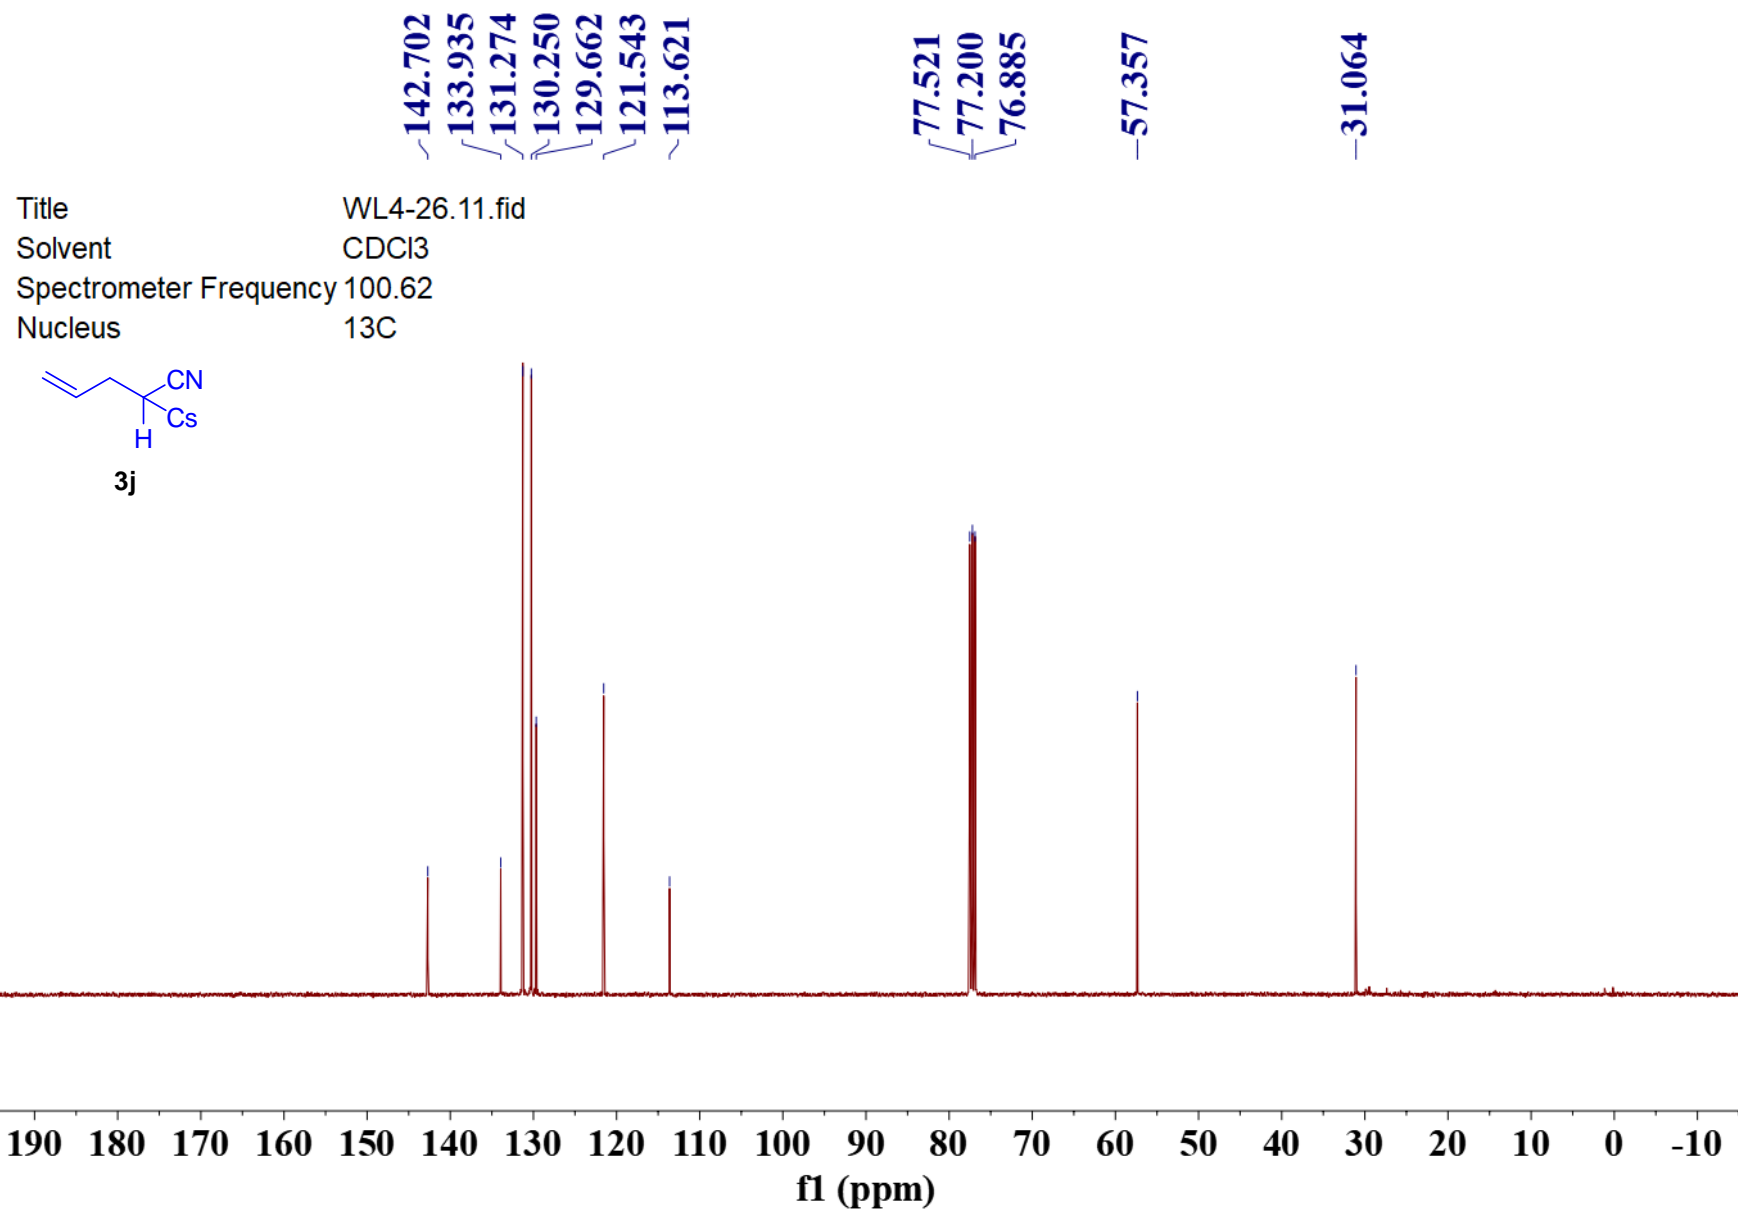

8.5122  
8.4901  
8.2619  
8.2398  
5.8304  
5.8130  
5.8053  
5.7880  
5.7706  
5.7629  
5.7454  
5.3745  
5.3715  
5.3500  
5.3250  
5.3222  
4.0379  
4.0267  
4.0113  
4.0002  
3.0445  
3.0332  
3.0304  
3.0277  
3.0195  
3.0166  
3.0126  
2.9982  
2.9953  
2.9924  
2.9893  
2.9813  
2.9779  
2.7298  
2.7117  
2.7033  
2.6853  
2.6681  
2.6499  
0.0000

Title WL4-45-4.10.fid  
Solvent CDCl3  
Spectrometer Frequency 400.13  
Nucleus 1H

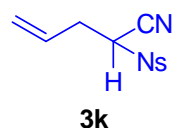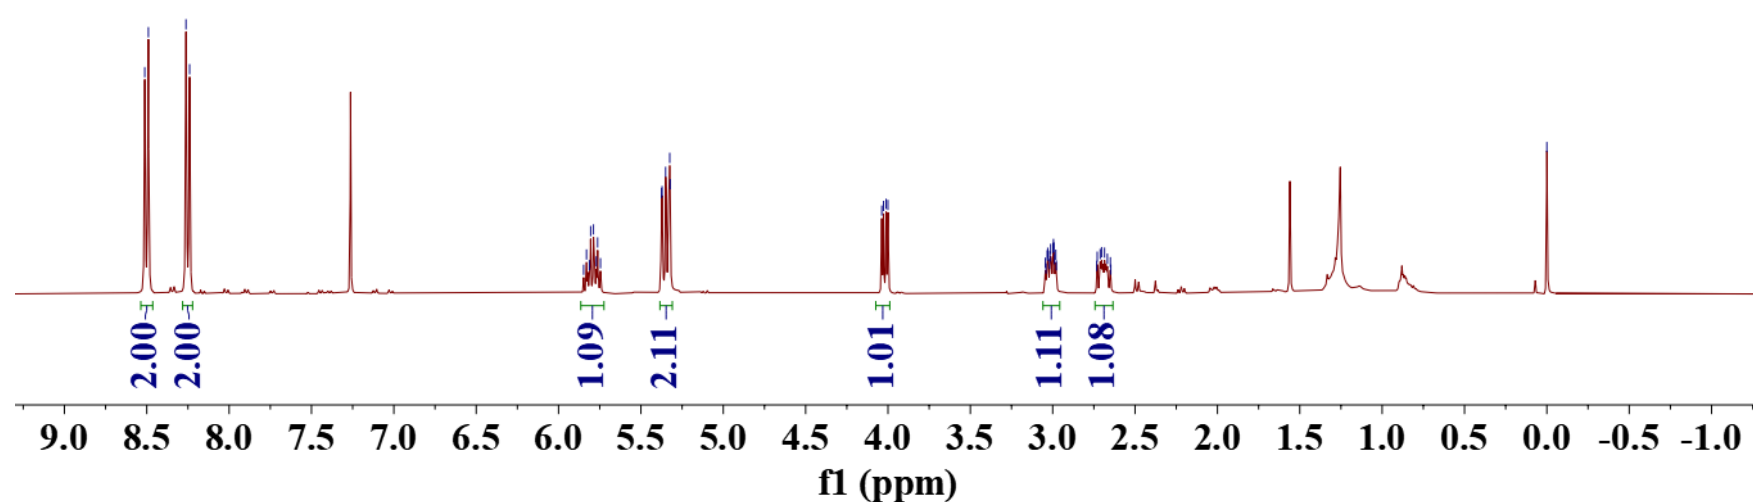

Title WL4-45-4.11.fid  
Solvent CDCl3  
Spectrometer Frequency 100.62  
Nucleus 13C

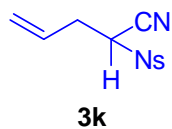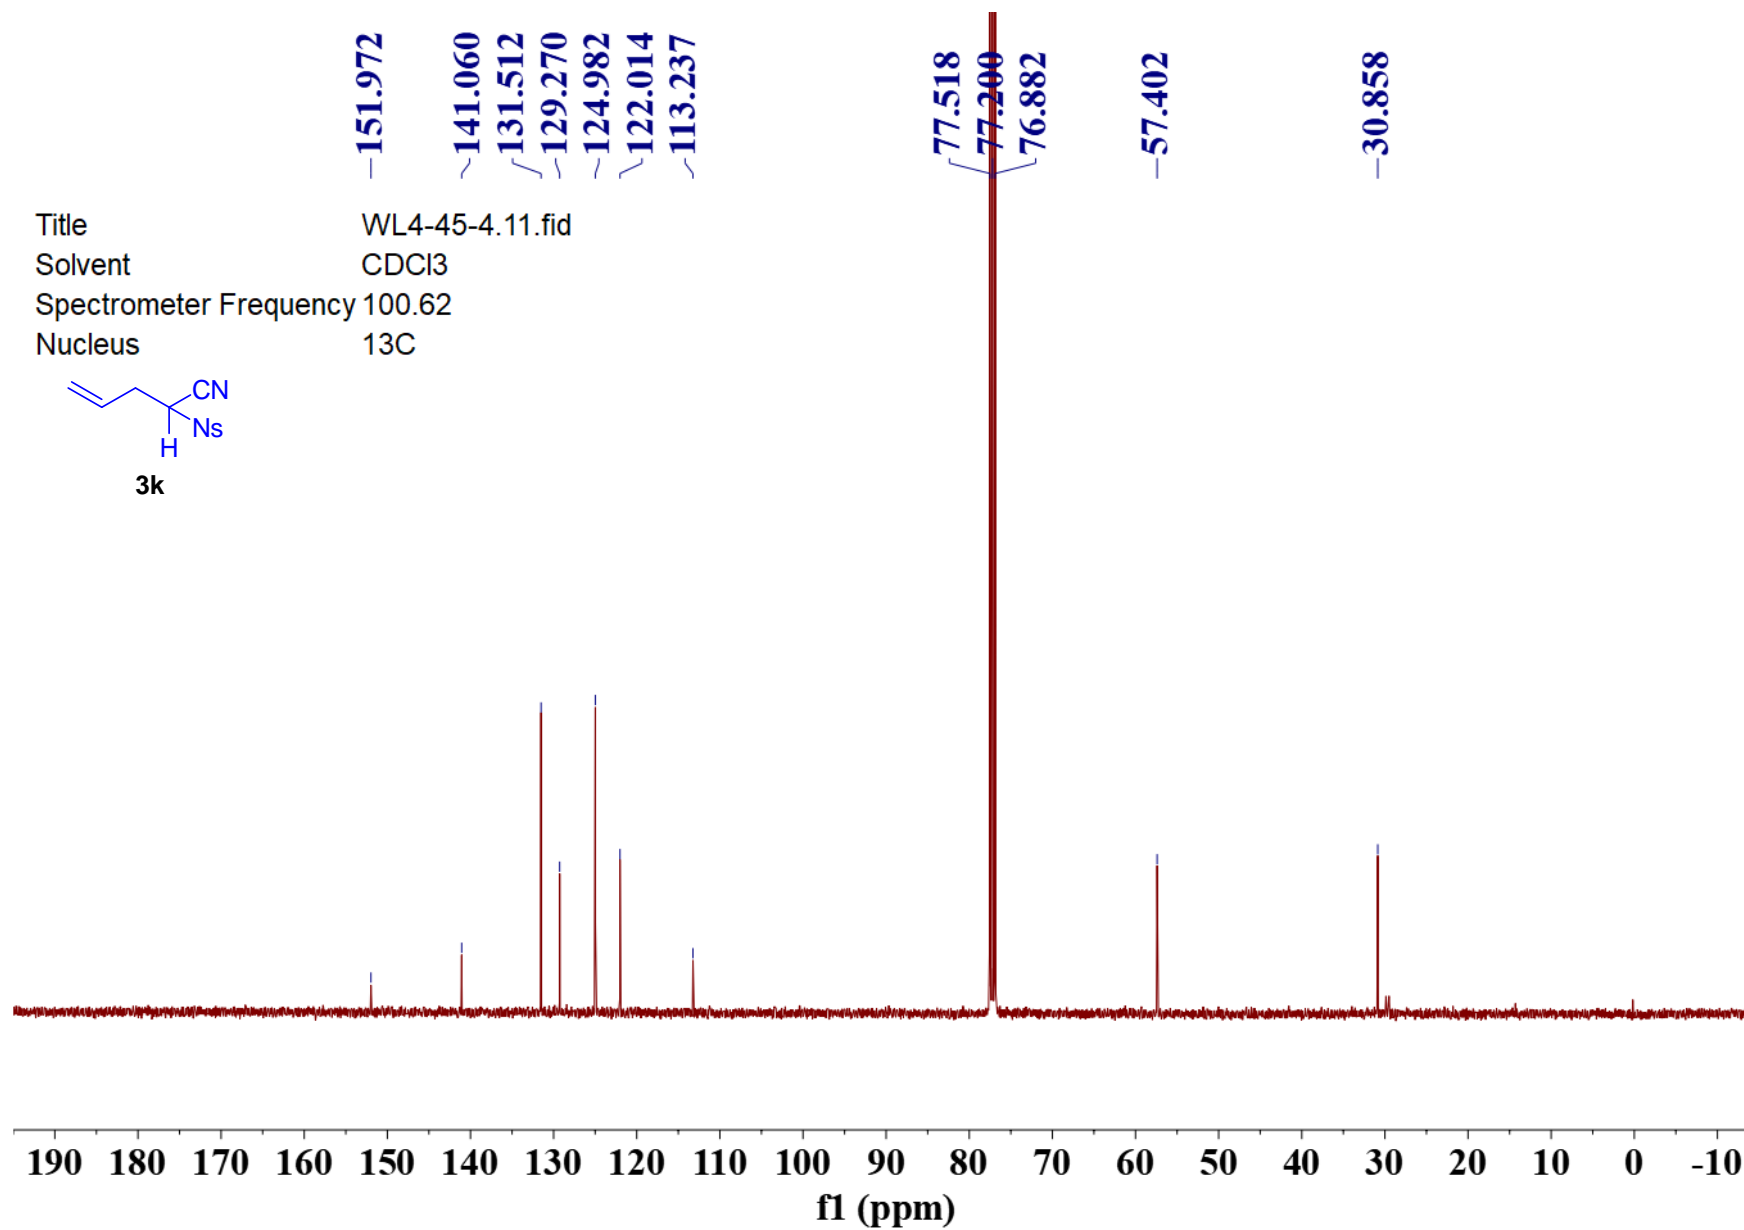

S200

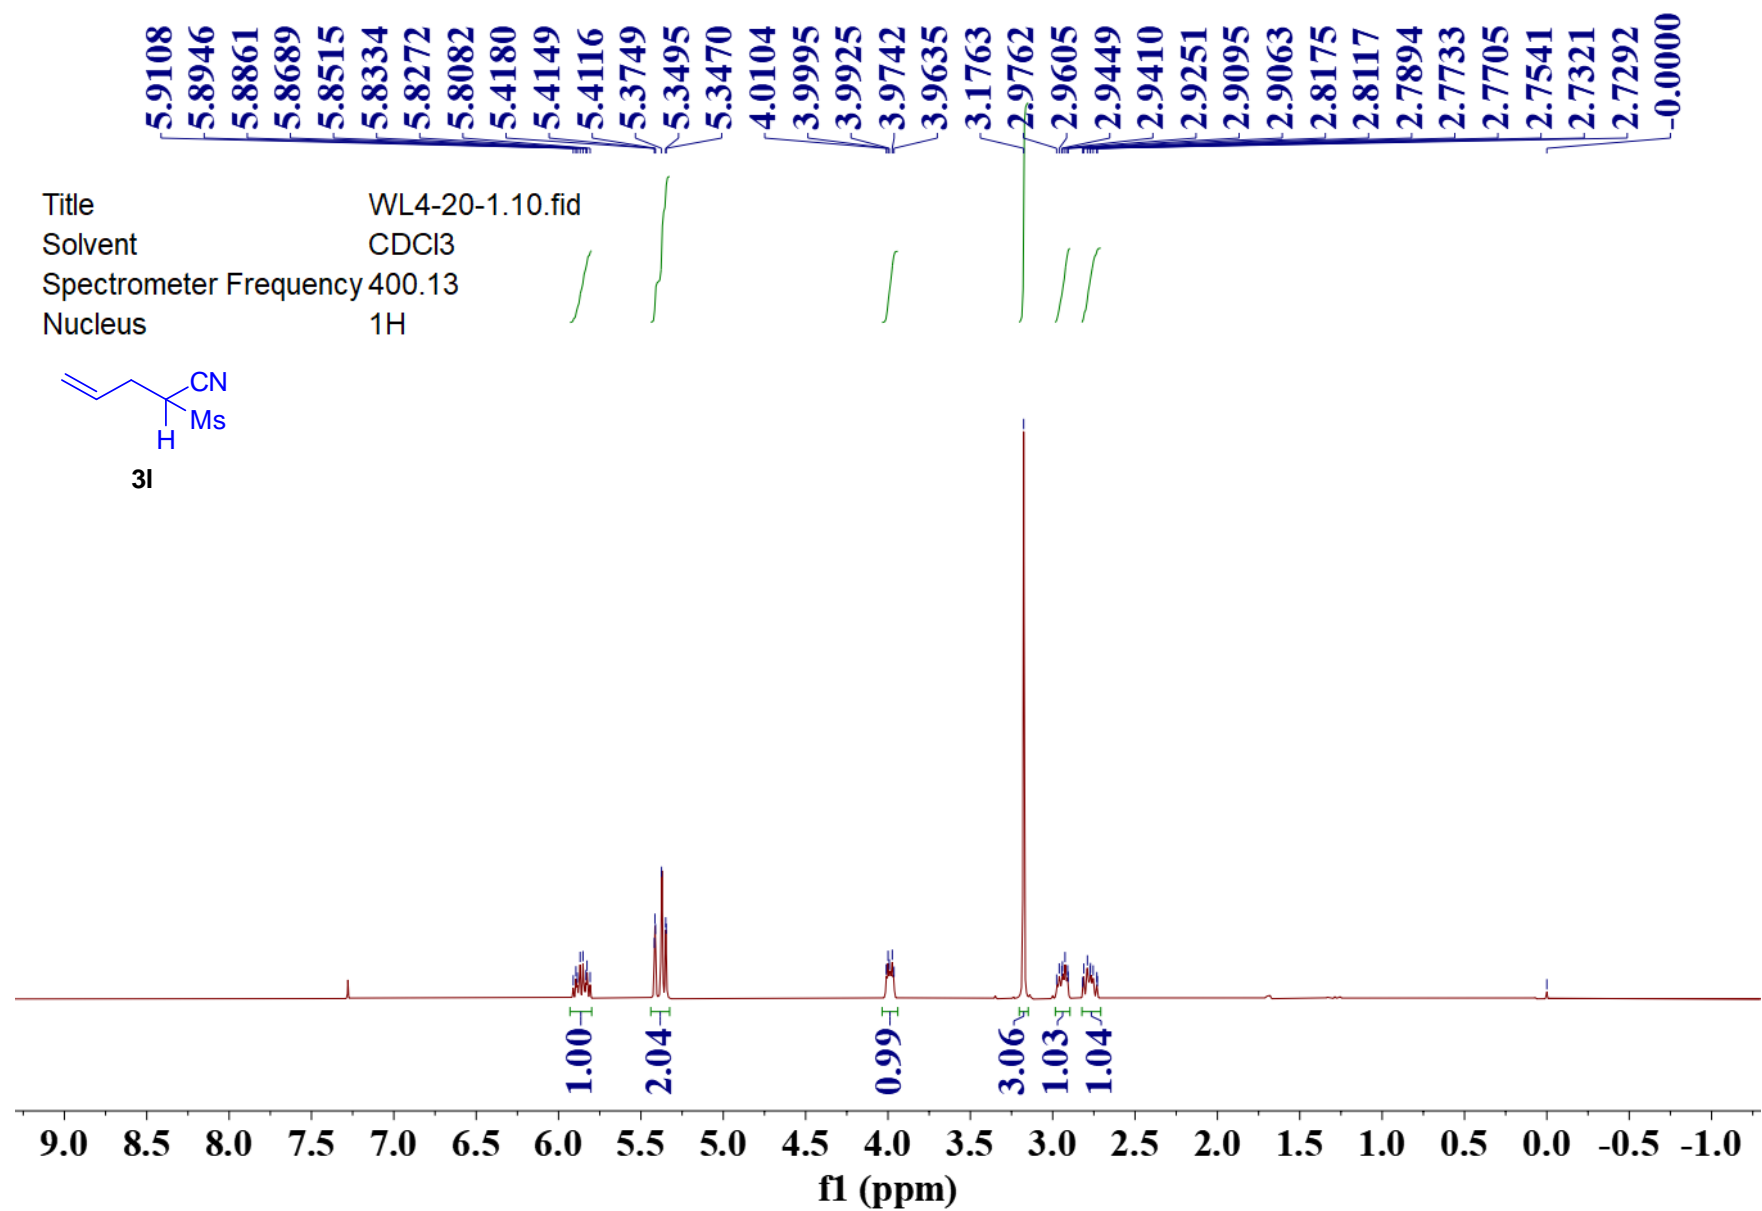

Title WL4-20-1.11.fid  
Solvent CDCl<sub>3</sub>  
Spectrometer Frequency 100.62  
Nucleus <sup>13</sup>C

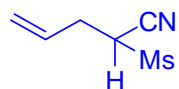

3l

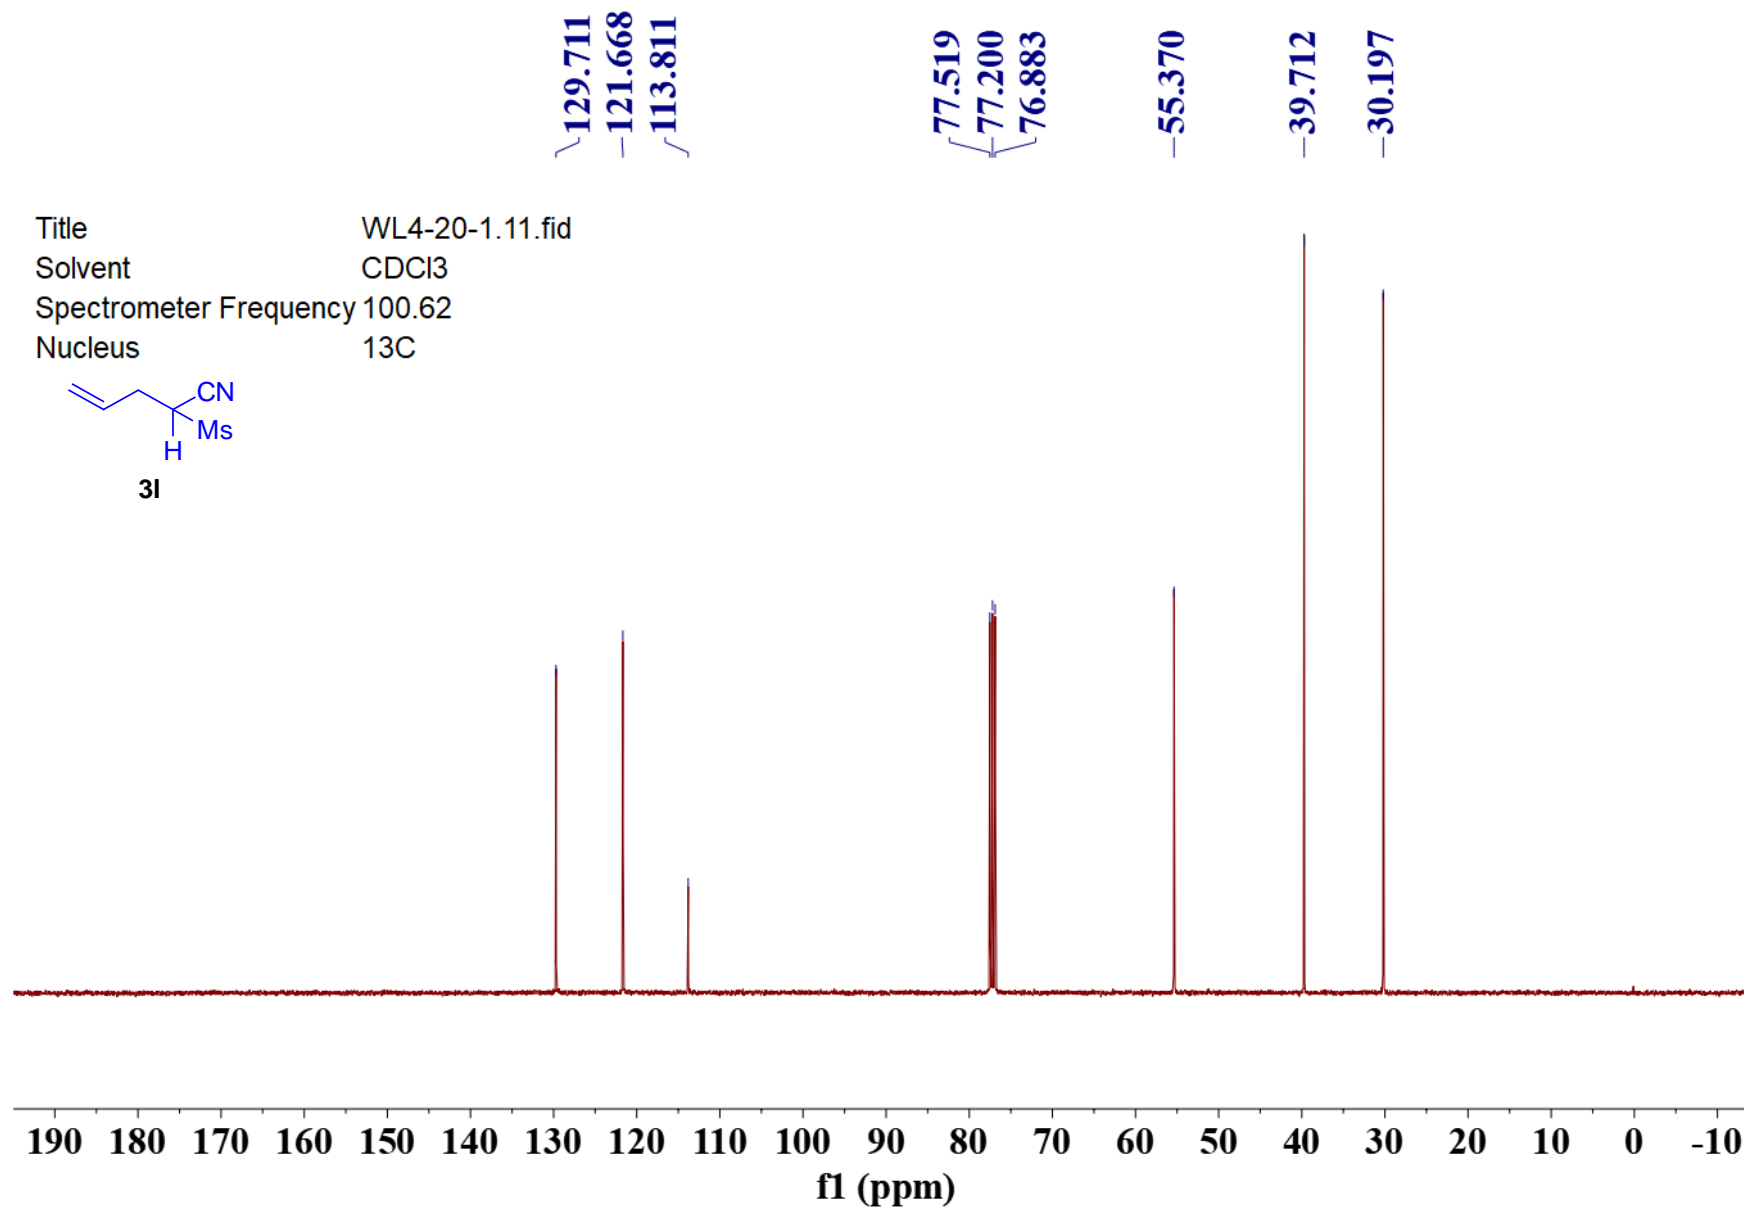

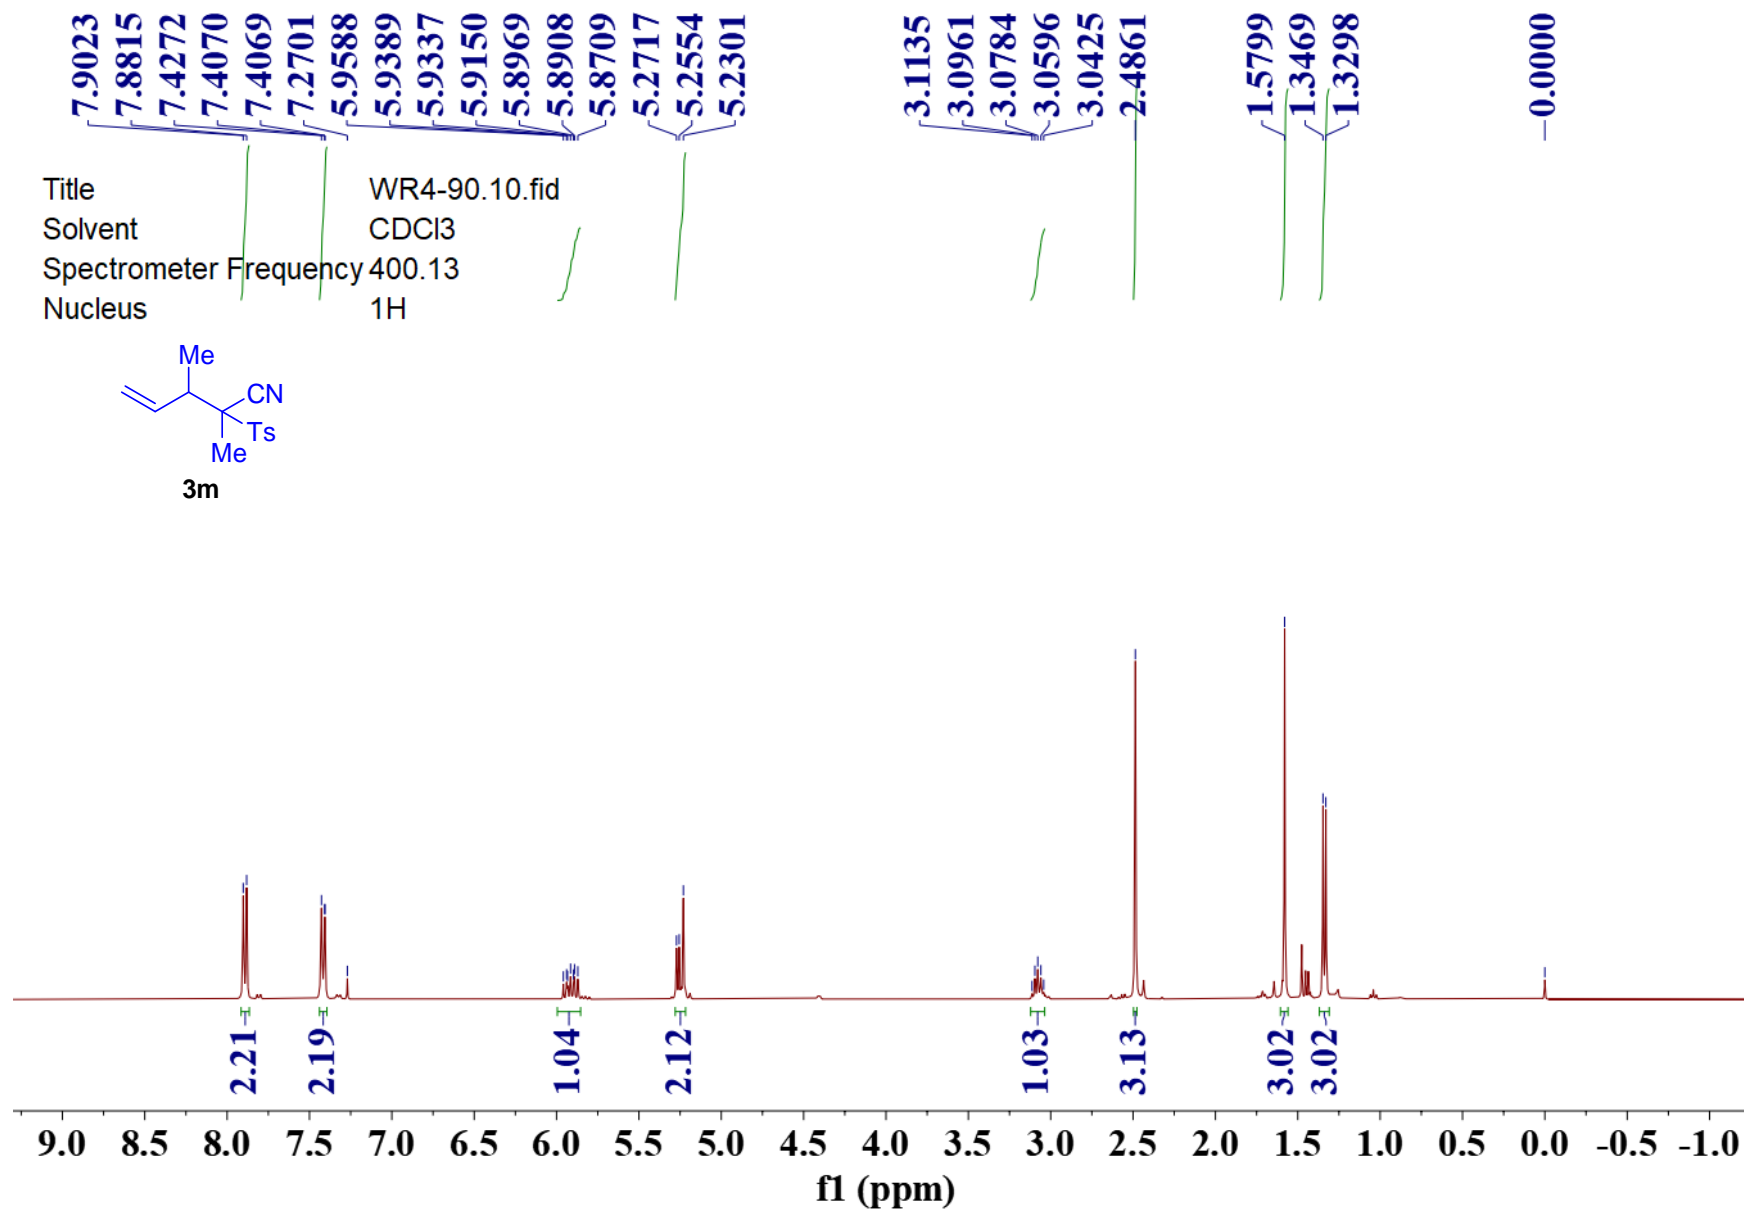



Title WR4-90.10.fid  
Solvent CDCl<sub>3</sub>  
Spectrometer Frequency 100.62  
Nucleus <sup>13</sup>C

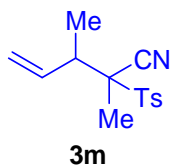

146.557  
136.699  
131.994  
130.896  
130.032  
118.808  
117.757

77.518  
77.200  
76.883  
65.467

40.990

21.948  
16.481  
15.186

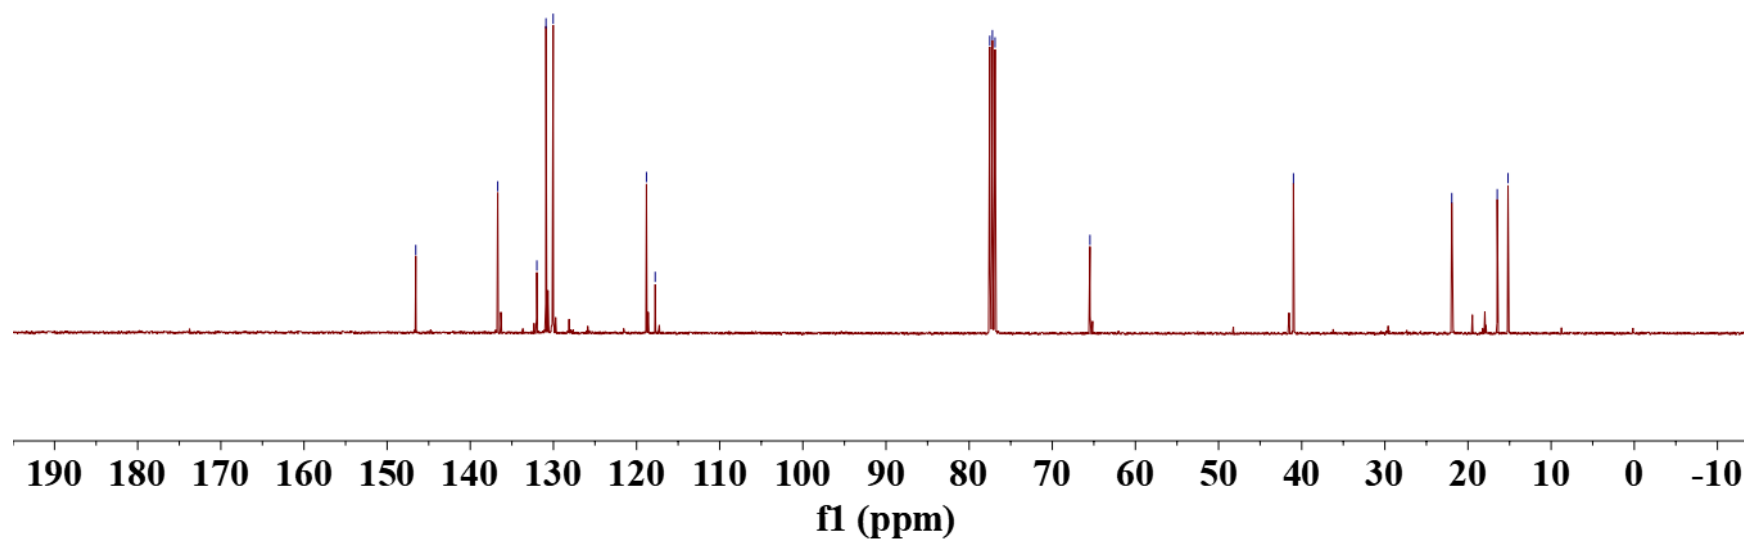

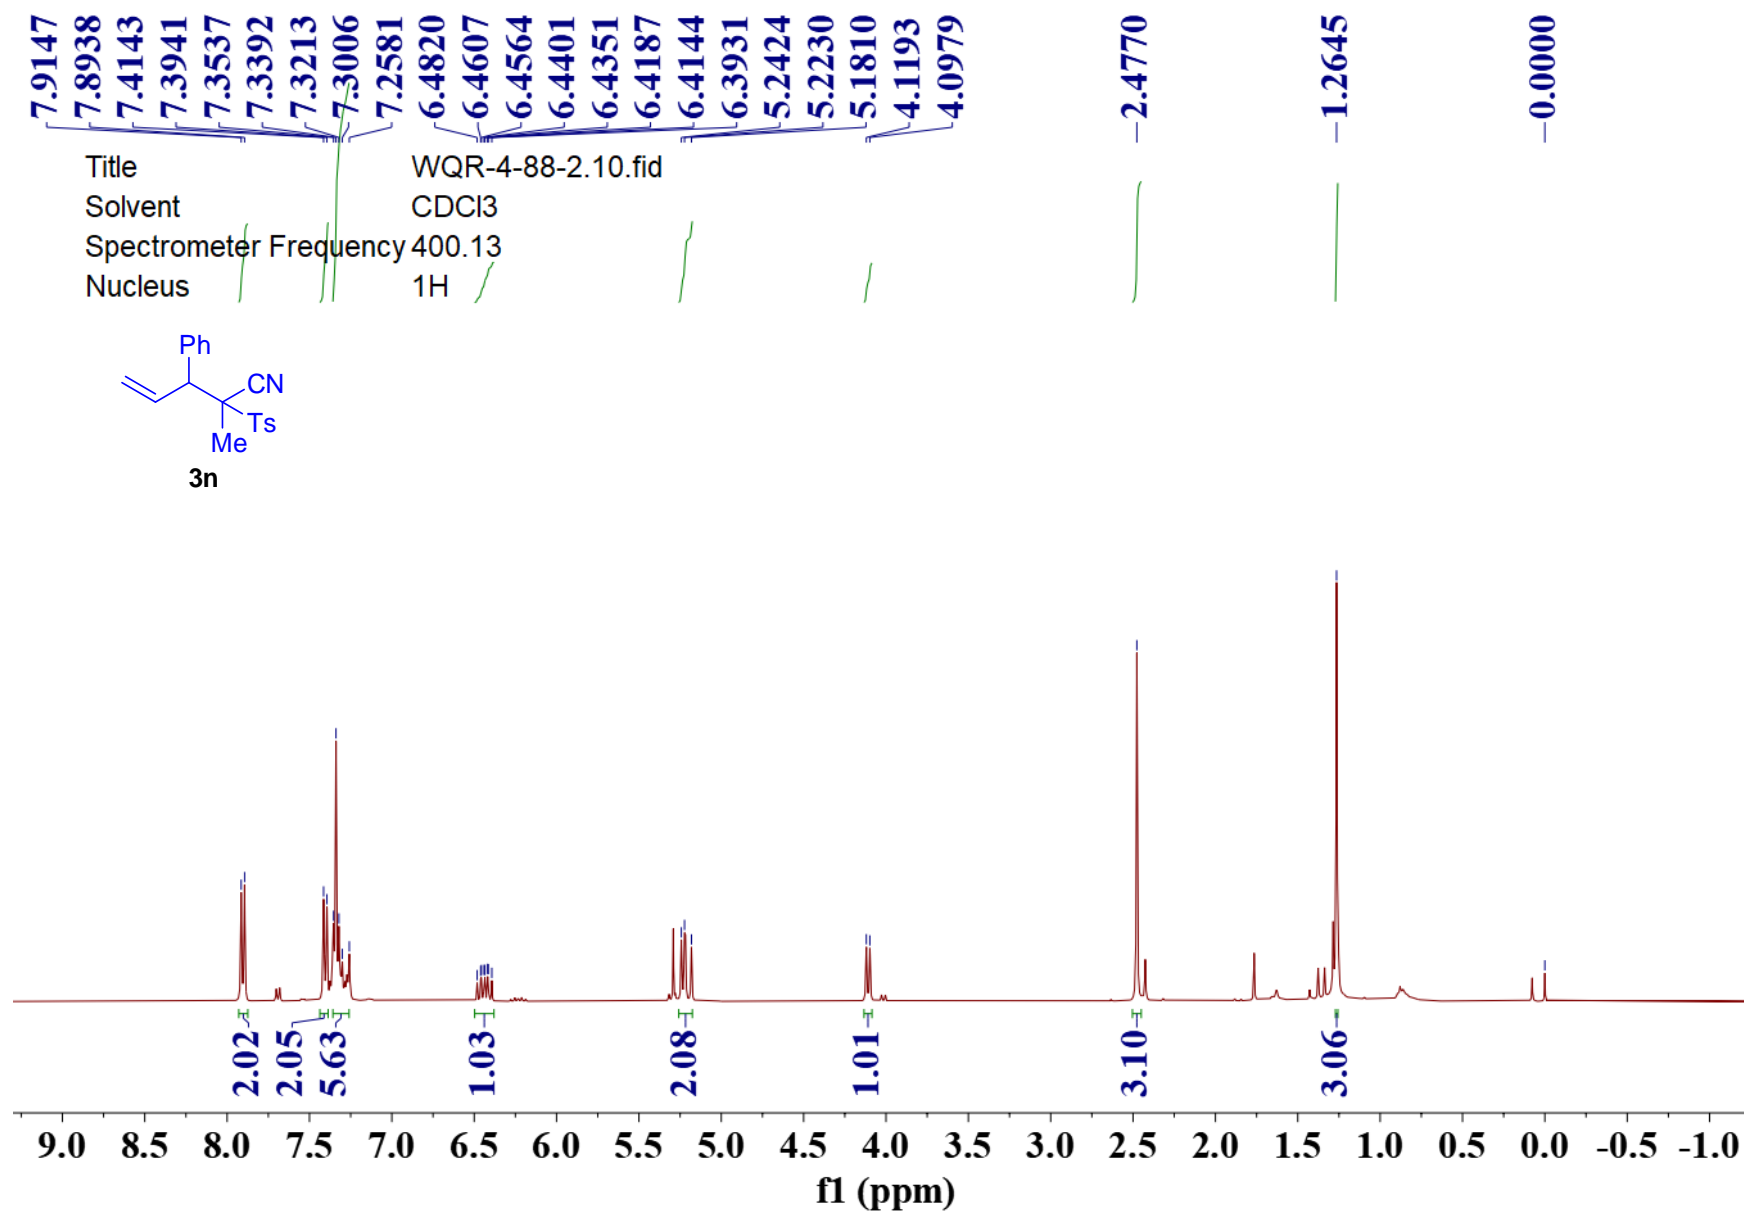

S205

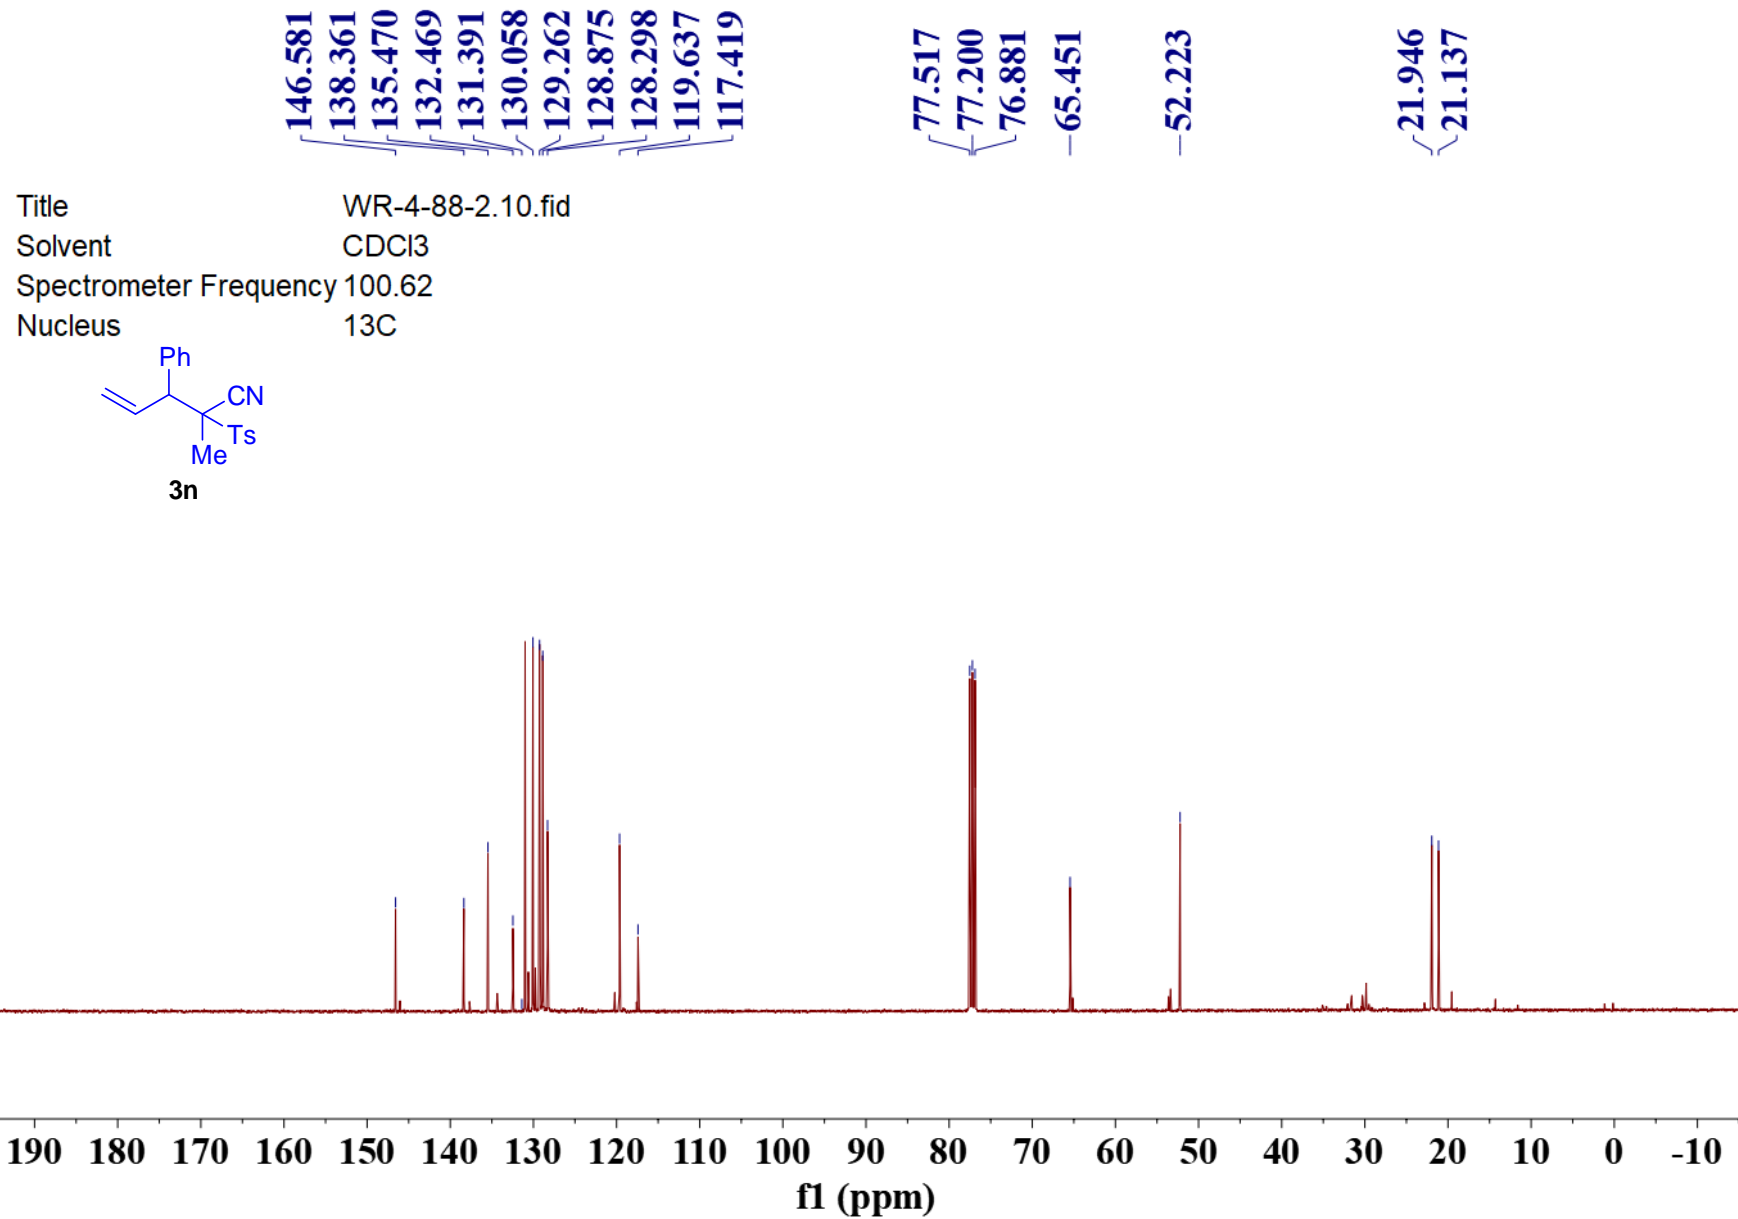

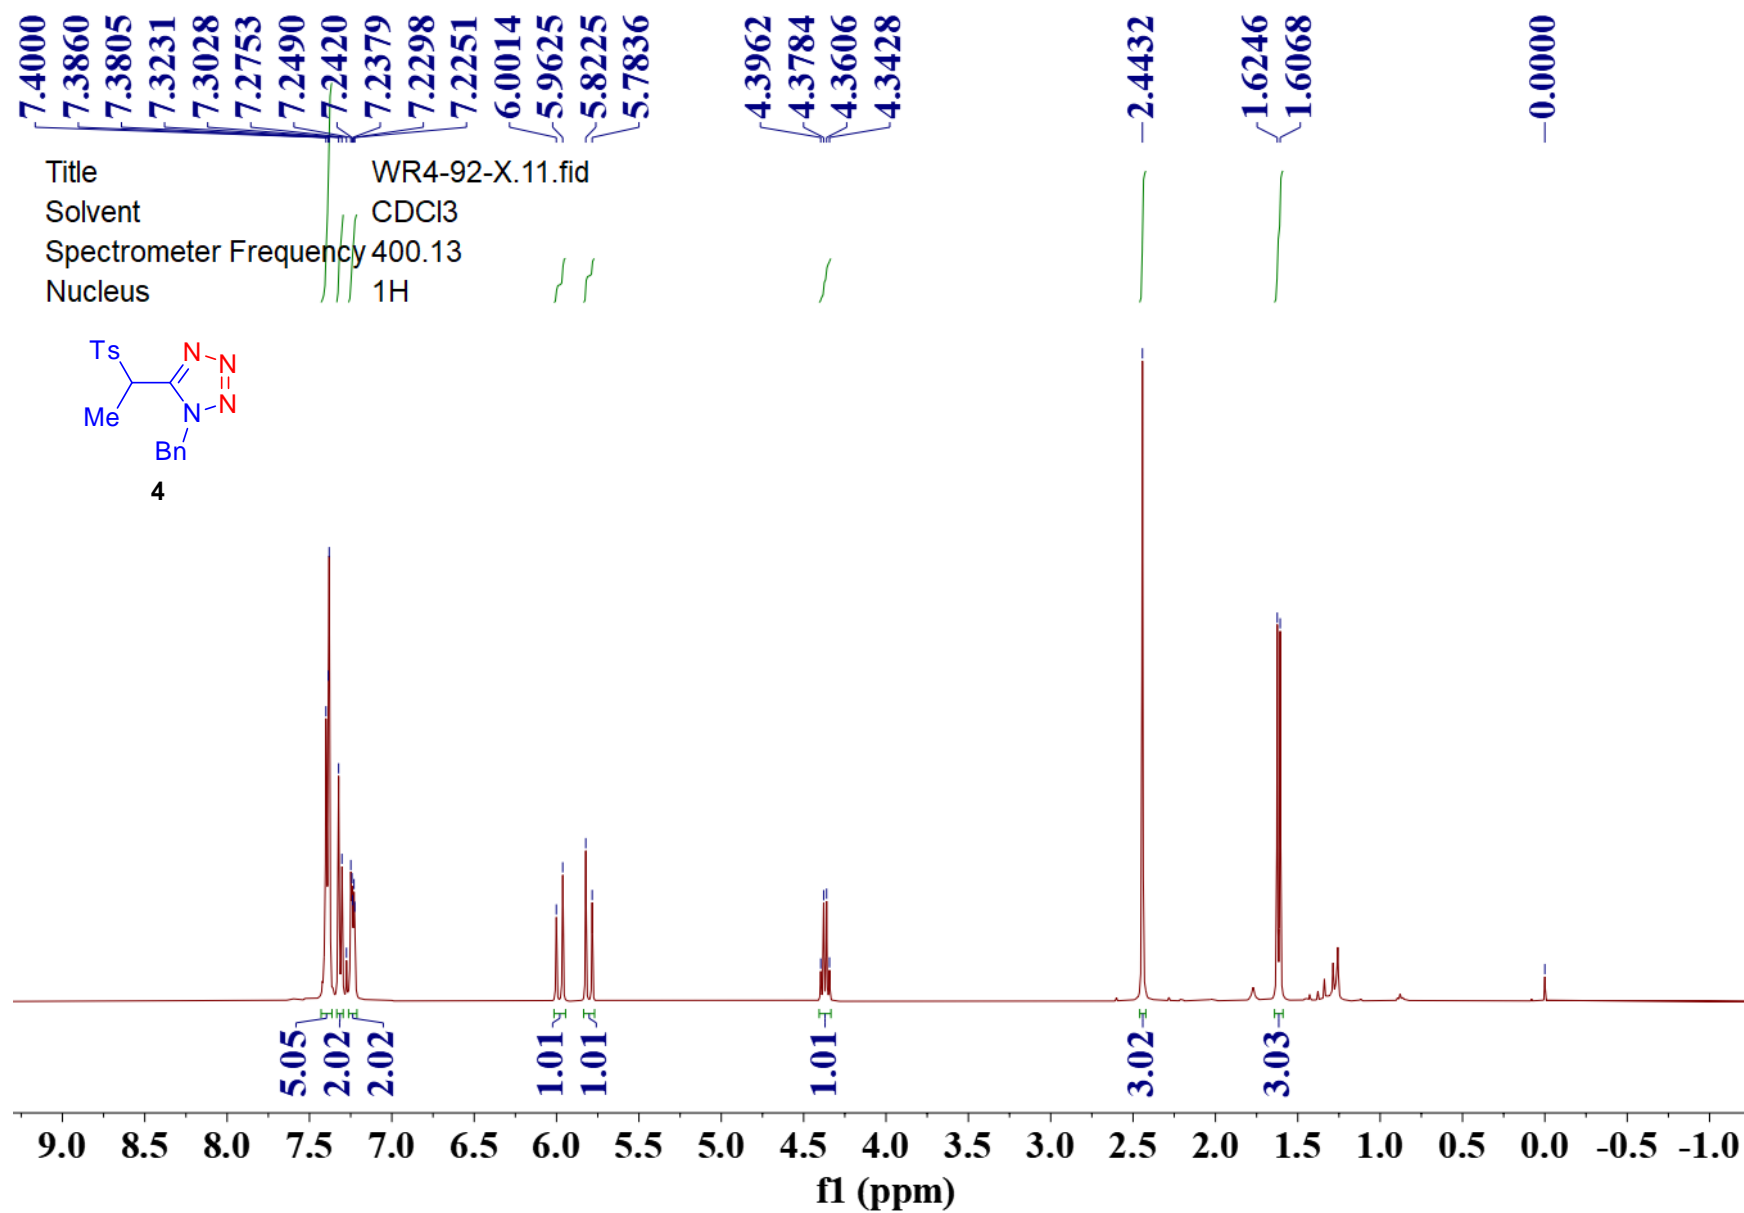

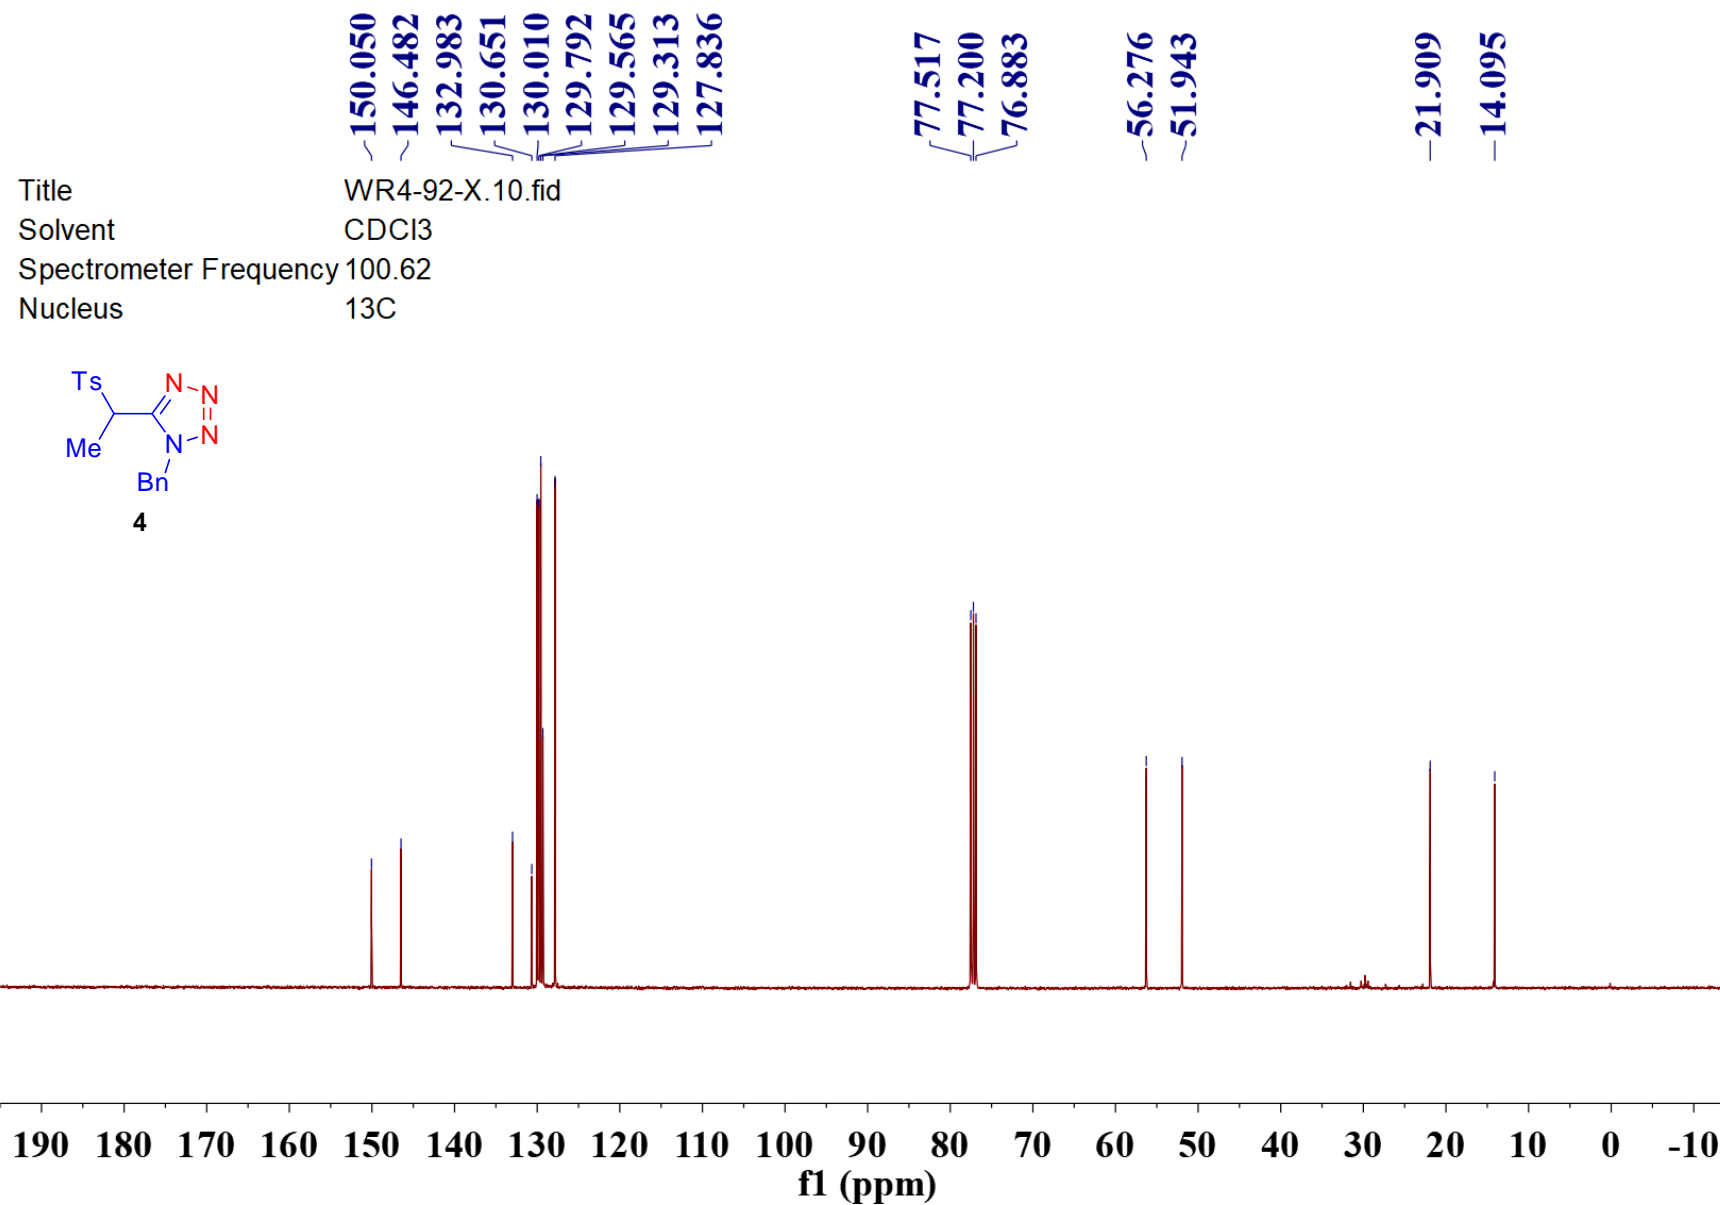

S208
